# Supplementary material for: Comparative Transcriptional Profiling of Primed and Non-primed Rice Seedlings under Submergence Stress
Source: Front Plant Sci. 2016 Jul 28;7:1125. doi: 10.3389/fpls.2016.01125 (PMC4964843; doi:10.3389/fpls.2016.01125)
Supplement: Table S1 — List of specific primers used for qRT-PCR analysis. F and R denote the forward and reserve primers, respectively. [file DataSheet1.XLS]

## Sheet: Primers list
Table S1: List of specific primers used for qRT-PCR analysis.
Primer Name	Sequence(5'to3')
LOC_Os08g37250.1-F	TGGAGACCGGCCATTACGT
LOC_Os08g37250.1-R	GGAGAGCTGCTTTGCGAACT
LOC_Os01g10980.1-F	CGTTCTTGAGAGGAGAAATGCA
LOC_Os01g10980.1-R	CAAGCAGAGCATACAAGAAAAGCT
LOC_Os05g12770.1-F	GGCCAGCTTCCCTTTCTTG
LOC_Os05g12770.1-R	AGCTCACGTCCAATATGCTTGA
LOC_Os02g07490.1-F	TCCGAGTTCCAACACCAAATG
LOC_Os02g07490.1-R	TCGTCATAGGATGCACTTTTTTCA
LOC_Os03g36560.1-F	ACATGAGATCGGAGGAGAGCTT
LOC_Os03g36560.1-R	CCACCCTGCCCATGTTCA
LOC_Os12g19470.1-F	GAGCTCGAGGAGGCAAAGAA
LOC_Os12g19470.1-R	GCCTAACGTTGTCAAAGCCAAT
LOC_Os06g41700.1-F	CTGCATAAGGCTTGGCAATG
LOC_Os06g41700.1-R	CCAGGGACTCCTTGATGTAGGT
LOC_Os01g52240.1-F	GAGGCCGTGTGGTTCAAG
LOC_Os01g52240.1-R	GACCTGGCAACCCCAGAT
House keeping gene
LOC_Os08g03290.1-F	GACAGCAGGTCGAGCATCTTC
LOC_Os08g03290.1-R	CAGGCGACAAGCTTGACAAAG
Note: F and R denote the farward and reverse primers, respectively
