# Supplementary material for: Comparative Transcriptional Profiling of Primed and Non-primed Rice Seedlings under Submergence Stress
Source: Front Plant Sci. 2016 Jul 28;7:1125. doi: 10.3389/fpls.2016.01125 (PMC4964843; doi:10.3389/fpls.2016.01125)
Supplement: Table S2 — List of DETs in NP+Cn (A), Se+Sub (B), and SA+Sub (C) treatments compared with NP+Sub. Genes with significantly (Fold change > |2|, FDR < 0.05) increased and decreased expression are presented. [file DataSheet2.XLS]

## Sheet: DETs-NP+Cn vs NP+Sub
Table S2-A: List of differentially expressed genes in NP+Cn compared with NP+Sub. Genes with significantly increased and decreased expression (Fold change > |2|, FDR<0.05) are given.
Gene ID	NP+Control-R1_CDPV	NP+Control-R2_CDPV	NP+Sub-R1_CDPV	NP+Sub-R2_CDPV	Fold Change	FDR	Description
ChrSy.fgenesh.mRNA.47	0.959371	1.12109	728.586	708.078	0.00144812	5.33e-13	/
ChrSy.fgenesh.mRNA.71	3.83748	0	40.2141	27.0528	0.0570486	0.0052928	/
ChrUn.fgenesh.mRNA.20	29.7405	41.4802	1.18277	4.70484	12.0967	0.0269742	/
ChrUn.fgenesh.mRNA.21	57.5623	51.5699	1429.97	1440.86	0.0380142	2.2e-06	/
ChrUn.fgenesh.mRNA.70	21.1062	8.96868	719.124	679.849	0.0214978	1.97e-07	/
ChrUn.fgenesh.mRNA.75	23.9843	29.1482	171.501	230.537	0.132158	0.0106804	/
ChrUn.fgenesh.mRNA.86	485.442	568.39	40.2141	32.9339	14.4068	0.000192958	/
ChrUn.fgenesh.mRNA.95	16.3093	15.6952	425.797	366.977	0.0403703	1.63e-05	/
ChrUn.fgenesh.mRNA.96	549.72	656.956	62.6868	85.8633	8.12303	0.00313806	/
LOC_Os01g01360.1	423.083	463.008	75.6972	52.9294	6.88886	0.00672975	peptide transporter PTR2, putative, expressed
LOC_Os01g01430.1	19.1874	20.1795	0	0	4365	0.00618309	No apical meristem protein, putative, expressed
LOC_Os01g01470.1	23.0249	21.3006	0	0	4365	0.0118413	no apical meristem protein, putative, expressed
LOC_Os01g01560.1	4.79686	2.24217	105.266	138.793	0.0288415	0.00011953	transposon protein, putative, unclassified, expressed
LOC_Os01g01650.1	1767.16	1909.21	128.922	216.422	10.6455	0.000464676	isoflavone reductase homolog IRL, putative, expressed
LOC_Os01g01660.1	188.996	208.522	0	0	4365	4.87e-09	isoflavone reductase, putative, expressed
LOC_Os01g01890.1	710.894	1103.15	55.5901	25.8766	22.2673	6.68e-06	expressed protein
LOC_Os01g01940.1	48.9279	36.9958	4.73108	3.52863	10.4028	0.0196958	expressed protein
LOC_Os01g02010.1	1058.19	1193.96	7.09661	14.1145	106.177	4.04e-10	expressed protein
LOC_Os01g02050.1	142.946	107.624	696.651	685.73	0.18126	0.0210465	phosphoenolpyruvate carboxylase, putative, expressed
LOC_Os01g02290.1	135.271	113.23	612.674	743.364	0.183255	0.0207072	Ser/Thr receptor-like kinase, putative, expressed
LOC_Os01g02300.1	130.474	100.898	593.75	738.659	0.173649	0.0160993	receptor kinase ORK10, putative, expressed
LOC_Os01g02900.1	2805.2	2538.14	13195	13475.8	0.200344	0.0234699	glycosyltransferase, putative, expressed
LOC_Os01g02910.1	616.876	590.812	2628.11	3153.42	0.208887	0.0293148	glycosyltransferase, putative, expressed
LOC_Os01g02930.1	1114.79	771.307	17642.2	20742.4	0.0491368	6.38e-06	glycosyltransferase protein, putative, expressed
LOC_Os01g03030.1	357.845	456.282	33.1175	31.7576	12.5491	0.000518943	alanyl-tRNA synthetase, putative, expressed
LOC_Os01g03080.1	47.9686	35.8747	351.282	308.167	0.127141	0.00445307	expressed protein
LOC_Os01g03180.1	11.5125	53.8121	2.36554	2.35242	13.8459	0.0205928	retrotransposon protein, putative, unclassified, expressed
LOC_Os01g03230.1	21.1062	63.9019	0	0	4365	0.000485154	retrotransposon protein, putative, unclassified, expressed
LOC_Os01g03310.1	124.718	178.253	0	0	4365	1.09e-07	BBTI1 - Bowman-Birk type bran trypsin inhibitor precursor, expressed
LOC_Os01g03320.1	26.8624	28.0271	0	0	4365	0.0176844	BBTI2 - Bowman-Birk type bran trypsin inhibitor precursor, expressed
LOC_Os01g03490.1	2493.41	3222	264.94	179.96	12.8465	0.000132108	heavy-metal-associated domain-containing protein, putative, expressed
LOC_Os01g03530.1	4.79686	8.96868	244.833	188.193	0.0317891	1.12e-05	multicopper oxidase domain containing protein, expressed
LOC_Os01g03549.1	308.918	267.939	1946.84	1787.84	0.15446	0.00696277	multi-copper oxidase type I family protein, putative, expressed
LOC_Os01g03630.1	1.91874	2.24217	78.0627	7.05725	0.0488829	0.0131022	multicopper oxidase domain containing protein, expressed
LOC_Os01g03640.1	0	2.24217	42.5797	7.05725	0.0451714	0.0150099	multicopper oxidase domain containing protein, expressed
LOC_Os01g03680.1	643.738	197.311	16.5588	4.70484	39.5535	7.24e-07	BBTI8 - Bowman-Birk type bran trypsin inhibitor precursor, expressed
LOC_Os01g03720.1	74.831	100.898	2.36554	15.2907	9.95277	0.00438446	MYB family transcription factor, putative, expressed
LOC_Os01g03914.2	14.3906	23.5428	0	0	4365	0.00898876	cation efflux family protein, putative, expressed
LOC_Os01g03940.1	114.165	144.62	5.91384	2.35242	31.3062	7.41e-05	expressed protein
LOC_Os01g04050.1	4460.12	4871.12	747.51	915.091	5.61243	0.0137647	BBTI12 - Bowman-Birk type bran trypsin inhibitor precursor, expressed
LOC_Os01g04170.1	357.845	553.816	36.6658	47.0484	10.8902	0.000650974	expressed protein
LOC_Os01g04350.1	2113.49	2910.34	78.0627	55.2818	37.6756	1.23e-07	hsp20/alpha crystallin family protein, putative, expressed
LOC_Os01g04390.1	66.1966	76.2338	9.46215	7.05725	8.62201	0.0288211	expressed protein
LOC_Os01g04590.1	326.186	282.513	8.27938	7.05725	39.6893	2.15e-06	expressed protein
LOC_Os01g04630.1	855.759	876.689	9.46215	15.2907	69.9898	9.95e-09	muconate cycloisomerase, putative, expressed
LOC_Os01g04750.1	108.409	58.2964	740.413	859.809	0.104176	0.00110157	B3 DNA binding domain containing protein, expressed
LOC_Os01g04800.1	509.426	692.831	3072.83	3805.04	0.174801	0.011525	B3 DNA binding domain containing protein, expressed
LOC_Os01g04950.3	40.2936	31.3904	2.36554	1.17621	20.2397	0.00772496	peptide transporter PTR2, putative, expressed
LOC_Os01g04960.1	6.7156	5.60543	79.2455	70.5725	0.0822399	0.0114637	transposon protein, putative, unclassified, expressed
LOC_Os01g05010.1	792.441	997.766	159.674	177.608	5.30775	0.0214775	mitochondrial glycoprotein, putative, expressed
LOC_Os01g05030.1	42.2123	34.7536	4.73108	2.35242	10.8655	0.026349	transposon protein, putative, unclassified, expressed
LOC_Os01g05744.1	122.8	112.109	7.09661	11.7621	12.4562	0.00206782	expressed protein
LOC_Os01g05810.1	876.865	1016.82	195.157	216.422	4.60103	0.0408204	gamma-glutamyltranspeptidase 1 precursor, putative, expressed
LOC_Os01g05820.1	304.121	403.591	7.09661	7.05725	50.0013	7.54e-07	gamma-glutamyltranspeptidase 1 precursor, putative, expressed
LOC_Os01g05840.1	3877.78	4285.91	644.609	639.858	6.3557	0.0071131	oxidoreductase, short chain dehydrogenase/reductase family domain containing family, expressed
LOC_Os01g06150.1	35.4967	12.3319	1104.71	1272.66	0.0201184	5.85e-08	expressed protein
LOC_Os01g06560.1	96.8965	109.866	9787.41	12430.2	0.00930627	5.67e-11	transcription factor HBP-1b, putative, expressed
LOC_Os01g06560.2	0.959371	1.12109	20.1071	38.8149	0.0353087	0.0426775	transcription factor HBP-1b, putative, expressed
LOC_Os01g06580.1	1239.51	1427.14	261.392	315.224	4.62465	0.0359968	fasciclin domain containing protein, expressed
LOC_Os01g06640.1	83.4653	44.8434	17.7415	4.70484	5.71623	0.0495003	basic helix-loop-helix, putative, expressed
LOC_Os01g07150.1	9.59371	12.3319	830.304	848.047	0.0130638	6.49e-09	expressed protein
LOC_Os01g07330.1	186.118	143.499	24.8381	38.8149	5.17834	0.042406	expressed protein
LOC_Os01g07420.1	648.535	670.409	43.7625	102.33	9.02813	0.00172651	hydrolase, alpha/beta fold family protein, putative, expressed
LOC_Os01g07480.1	61.3998	109.866	3.54831	5.88104	18.1631	0.000592802	DUF260 domain containing protein, putative, expressed
LOC_Os01g07530.1	869.19	1063.91	40.2141	41.1673	23.7536	4.18e-06	uncharacterized glycosyltransferase, putative, expressed
LOC_Os01g07850.1	787.644	1001.13	11.8277	21.1718	54.2061	4.1e-08	glyoxalase family protein, putative, expressed
LOC_Os01g07910.1	1996.45	1977.59	178.598	188.193	10.8346	0.000398742	NADH-cytochrome b5 reductase, putative, expressed
LOC_Os01g07990.1	75.7903	59.4175	424.614	412.849	0.161449	0.0140538	retrotransposon protein, putative, unclassified, expressed
LOC_Os01g08150.1	1425.63	1817.28	86.3421	54.1056	23.0898	3.74e-06	expressed protein
LOC_Os01g08220.1	154.459	159.194	613.857	764.536	0.22755	0.0492818	gibberellin 3-beta-dioxygenase 2-2, putative, expressed
LOC_Os01g08530.1	83.4653	68.3862	0	0	4365	7.41e-06	retrotransposon protein, putative, unclassified, expressed
LOC_Os01g08810.1	59.481	88.5657	0	1.17621	125.868	1.68e-05	cytochrome P450, putative, expressed
LOC_Os01g09030.1	297.405	281.392	4022.6	3868.55	0.0733477	8.76e-05	2-aminoethanethiol dioxygenase, putative, expressed
LOC_Os01g09080.1	452.823	340.81	2348.98	2103.06	0.178263	0.0150829	WRKY107, expressed
LOC_Os01g09430.1	598.648	658.077	102.901	107.035	5.98623	0.0130633	expressed protein
LOC_Os01g09470.1	127.596	218.612	8.27938	11.7621	17.2746	0.000275591	IQ calmodulin-binding motif family protein, expressed
LOC_Os01g09490.1	23.9843	10.0898	425.797	374.034	0.0426015	2.34e-05	transposon protein, putative, unclassified, expressed
LOC_Os01g09540.1	2152.83	3297.11	10.6449	4.70484	355.051	1.02e-13	HAD superfamily phosphatase, putative, expressed
LOC_Os01g09580.1	874.947	1063.91	43.7625	59.9867	18.6879	1.82e-05	CAMK_CAMK_like_Aur_like.1 - CAMK includes calcium/calmodulin depedent protein kinases, expressed
LOC_Os01g09580.2	146.784	162.557	10.6449	2.35242	23.8003	8.36e-05	CAMK_CAMK_like_Aur_like.1 - CAMK includes calcium/calmodulin depedent protein kinases, expressed
LOC_Os01g09590.1	57.5623	45.9645	14.1932	1.17621	6.73589	0.0269541	myb-like DNA-binding domain containing protein, putative, expressed
LOC_Os01g09640.1	730.082	582.964	151.394	132.912	4.61842	0.0392984	Myb transcription factor, putative, expressed
LOC_Os01g09830.1	136.231	190.584	622.136	902.152	0.214405	0.0328111	OsGrx_A2 - glutaredoxin subgroup III, expressed
LOC_Os01g10140.2	70.0341	99.7766	3.54831	10.5859	12.0142	0.0038036	RNA-dependent RNA polymerase, putative, expressed
LOC_Os01g10320.1	129.515	164.8	14.1932	21.1718	8.3222	0.00658333	class III HD-Zip protein 8, putative, expressed
LOC_Os01g10370.1	13.4312	1.12109	107.632	148.202	0.0568817	0.00175663	AP2 domain containing protein, expressed
LOC_Os01g10400.1	8006.91	4915.96	164.405	176.431	37.9152	7.58e-08	expressed protein
LOC_Os01g10400.2	1128.22	1151.35	24.8381	43.5197	33.3477	4.66e-07	expressed protein
LOC_Os01g10504.1	75.7903	66.144	3.54831	2.35242	24.0537	0.0010662	OsMADS3 - MADS-box family gene with MIKCc type-box, expressed
LOC_Os01g10980.1	22.0655	13.453	0	0	4365	0.00245841	auxin-induced protein 5NG4, putative, expressed
LOC_Os01g10990.1	103.612	108.745	0	0	4365	9.07e-07	integral membrane protein DUF6 containing protein, expressed
LOC_Os01g11010.1	512.304	554.937	14.1932	19.9956	31.2161	1.69e-06	peptide-N4-asparagine amidase A, putative, expressed
LOC_Os01g11280.1	137.19	160.315	28.3865	19.9956	6.14909	0.0308303	cytochrome P450, putative, expressed
LOC_Os01g11340.1	1772.92	1642.39	10660.3	11619.8	0.15329	0.00611696	cytochrome P450, putative, expressed
LOC_Os01g11350.1	681.154	890.142	3096.49	3943.83	0.223185	0.0371383	bZIP transcription factor domain containing protein, expressed
LOC_Os01g11460.1	10.5531	11.2109	59.1384	76.4536	0.16051	0.0415987	zinc finger, C3HC4 type domain containing protein, expressed
LOC_Os01g11480.1	23.0249	30.2693	432.893	523.413	0.0557292	4.64e-05	zinc finger, C3HC4 type domain containing protein, expressed
LOC_Os01g11520.1	75.7903	53.8121	769.983	662.206	0.0904926	0.000587432	RING-H2 finger protein, putative, expressed
LOC_Os01g11620.1	8235.24	8537.06	428.162	310.519	22.7057	2.81e-06	GDSL-like lipase/acylhydrolase, putative, expressed
LOC_Os01g11910.1	511.345	465.25	121.825	79.9822	4.83924	0.0327257	basic helix-loop-helix, putative, expressed
LOC_Os01g12040.1	8.63434	7.8476	92.256	92.9205	0.0890066	0.00945073	transposon protein, putative, unclassified, expressed
LOC_Os01g12070.1	3.83748	40.3591	0	0	4365	0.0189876	endoglucanase precursor, putative, expressed
LOC_Os01g12110.1	49.8873	72.8705	5.91384	3.52863	13.0006	0.0109087	expressed protein
LOC_Os01g12110.2	14.3906	39.238	0	1.17621	45.5944	0.0272168	expressed protein
LOC_Os01g12190.1	143.906	141.257	9.46215	7.05725	17.2623	0.000208056	expressed protein
LOC_Os01g12460.1	96.8965	132.288	11.8277	23.5242	6.48295	0.0281544	expressed protein
LOC_Os01g12560.1	204.346	301.572	50.8591	36.4625	5.79374	0.0205101	3-methyl-2-oxobutanoate hydroxymethyltransferase, putative, expressed
LOC_Os01g12570.1	76.7497	59.4175	0	0	4365	8.67e-05	3-methyl-2-oxobutanoate hydroxymethyltransferase, putative, expressed
LOC_Os01g12660.1	110.328	99.7766	430.528	631.624	0.19781	0.0288467	AAA-type ATPase family protein, putative, expressed
LOC_Os01g12740.1	38.3748	48.2067	0	0	4365	0.000267621	cytochrome P450, putative, expressed
LOC_Os01g12750.1	41.253	28.0271	0	2.35242	29.4506	0.0207072	cytochrome P450, putative, expressed
LOC_Os01g12790.1	42.2123	30.2693	204.619	216.422	0.172148	0.0242326	receptor protein kinase, putative, expressed
LOC_Os01g12810.1	1128.22	837.451	6434.26	5147.09	0.169727	0.0108735	retrotransposon protein, putative, unclassified, expressed
LOC_Os01g12860.1	990.071	1115.48	121.825	132.912	8.26559	0.00206226	MYB family transcription factor, putative, expressed
LOC_Os01g13120.1	243.68	396.864	35.4831	32.9339	9.36237	0.00222879	aquaporin protein, putative, expressed
LOC_Os01g13130.1	22.0655	16.8163	0	0	4365	0.00311556	aquaporin protein, putative, expressed
LOC_Os01g13140.1	148.703	204.038	1.18277	0	298.232	1.76e-08	WD domain, G-beta repeat domain containing protein, expressed
LOC_Os01g13210.1	3675.35	2689.48	18298.6	18742.9	0.17183	0.0114847	salt stress root protein RS1, putative, expressed
LOC_Os01g13229.1	118.003	143.499	11.8277	11.7621	11.0854	0.00277029	cyclin-A1, putative, expressed
LOC_Os01g13260.1	277.258	362.111	41.3969	36.4625	8.21184	0.00368825	cyclin-A1, putative, expressed
LOC_Os01g13300.1	29.7405	52.691	0	0	4365	0.00156032	B3 DNA binding domain containing protein, expressed
LOC_Os01g13600.1	31.6593	32.5115	0	0	4365	0.00915724	nmrA-like family domain containing protein, expressed
LOC_Os01g14060.1	11.5125	17.9374	126.556	65.8677	0.153047	0.0218365	expressed protein
LOC_Os01g14090.1	386.627	445.071	29.5692	54.1056	9.93964	0.00116266	kinesin motor domain containing protein, putative, expressed
LOC_Os01g14410.1	440.351	226.459	6784.36	9340.28	0.0413535	2.25e-06	early light-induced protein, chloroplast precursor, putative, expressed
LOC_Os01g14510.1	436.514	383.411	0	9.40967	87.1364	2.73e-08	BRASSINOSTEROID INSENSITIVE 1 precursor, putative, expressed
LOC_Os01g14520.1	15.3499	17.9374	0	0	4365	0.0149802	C4-dicarboxylate transporter/malic acid transport protein domain containing protein, expressed
LOC_Os01g14550.1	201.468	154.71	14.1932	12.9383	13.1278	0.00169617	pathogen-related protein, putative, expressed
LOC_Os01g14630.1	278.218	265.697	7.09661	21.1718	19.2411	0.000130509	polyprenyl synthetase, putative, expressed
LOC_Os01g15000.1	484.482	420.407	44.9452	39.9911	10.6537	0.000986345	lipase, putative, expressed
LOC_Os01g15120.1	521.898	651.35	8.27938	16.4669	47.411	1.84e-07	hydrolase, alpha/beta fold family domain containing protein, expressed
LOC_Os01g15270.1	8092.3	9202.99	30633.7	42524.7	0.236409	0.0471032	expressed protein
LOC_Os01g15320.1	755.985	911.442	235.371	123.502	4.64629	0.0371615	RALFL9 - Rapid ALkalinization Factor RALF family protein precursor, expressed
LOC_Os01g15340.1	9.59371	11.2109	101.718	39.9911	0.146812	0.0269131	flowering promoting factor-like 1, putative, expressed
LOC_Os01g15770.1	804.912	978.707	105.266	128.207	7.63951	0.00350622	transmembrane protein 136, putative, expressed
LOC_Os01g15810.1	49.8873	5.60543	1.18277	0	46.9176	0.0294933	peroxidase precursor, putative, expressed
LOC_Os01g15830.1	2909.77	2256.74	320.53	411.673	7.05612	0.00394751	peroxidase precursor, putative, expressed
LOC_Os01g15900.1	176.524	79.597	827.938	775.122	0.15977	0.0101163	expressed protein
LOC_Os01g15979.1	589.054	559.422	2641.12	2981.69	0.204253	0.0262971	gb protein, putative, expressed
LOC_Os01g15990.1	270.543	279.15	1487.92	2201.86	0.148977	0.00585574	expressed protein
LOC_Os01g16030.1	3222.53	3220.88	303.972	410.497	9.01846	0.00105662	ADP-ribosylation factor, putative, expressed
LOC_Os01g16030.2	831.775	765.701	68.6006	92.9205	9.8902	0.000927259	ADP-ribosylation factor, putative, expressed
LOC_Os01g16120.1	203.387	242.154	18.9243	4.70484	18.8556	0.000148146	zinc finger, C3HC4 type domain containing protein, expressed
LOC_Os01g16140.1	102.653	149.104	697.834	859.809	0.161627	0.0092361	expressed protein
LOC_Os01g16146.1	260.949	328.478	35.4831	38.8149	7.93329	0.00407365	phenazine biosynthesis protein, putative, expressed
LOC_Os01g16152.1	1685.62	1692.84	357.196	354.039	4.75012	0.0313489	peroxiredoxin, putative, expressed
LOC_Os01g16400.1	83.4653	96.4133	4.73108	4.70484	19.0632	0.000917988	NB-ARC domain containing protein, expressed
LOC_Os01g16450.1	3354.92	2836.35	41061	42892.8	0.0737461	8.48e-05	peroxidase precursor, putative, expressed
LOC_Os01g16650.1	856.719	1420.41	130.105	87.0395	10.4867	0.000542117	ubiquitin-conjugating enzyme, putative, expressed
LOC_Os01g16870.1	4064.86	4732.1	920.194	970.372	4.65308	0.032763	argonaute, putative, expressed
LOC_Os01g16980.1	93.059	102.019	4.73108	4.70484	20.674	0.000429016	expressed protein
LOC_Os01g17050.1	501.751	381.169	2164.47	3146.36	0.166249	0.0103472	VQ domain containing protein, putative, expressed
LOC_Os01g17160.1	43.1717	21.3006	311.068	403.44	0.0902332	0.00109952	OsSubt1 - Putative Subtilisin homologue, expressed
LOC_Os01g17214.1	171.727	218.612	15.376	4.70484	19.4384	0.000190395	major facilitator superfamily antiporter, putative, expressed
LOC_Os01g17402.1	70.9935	59.4175	2.36554	1.17621	36.8211	0.000328974	cyclin, putative, expressed
LOC_Os01g18080.1	671.56	793.728	2.36554	7.05725	155.505	1.88e-10	retrotransposon protein, putative, unclassified, expressed
LOC_Os01g18220.1	47.0092	52.691	1.18277	0	84.2939	0.000608954	expressed protein
LOC_Os01g18950.1	25.903	1.12109	237.737	176.431	0.0652492	0.000962826	peroxidase precursor, putative, expressed
LOC_Os01g18970.1	118.003	0	363.11	308.167	0.175788	0.0345025	peroxidase precursor, putative, expressed
LOC_Os01g19020.1	6777	4886.81	70594.7	72419.2	0.0815571	0.000165614	peroxidase precursor, putative, expressed
LOC_Os01g19170.1	357.845	393.501	14.1932	31.7576	16.3511	7.6e-05	polygalacturonase, putative, expressed
LOC_Os01g19220.1	4771.91	5338.61	24567.3	25726	0.201031	0.0227726	beta-D-xylosidase, putative, expressed
LOC_Os01g19330.1	96.8965	33.6326	268.489	462.25	0.178626	0.027767	MYB family transcription factor, putative, expressed
LOC_Os01g19390.1	160.215	125.562	2.36554	0	120.808	9.09e-07	glycerol-3-phosphate acyltransferase, putative, expressed
LOC_Os01g19480.1	373.195	520.184	27.2037	52.9294	11.1487	0.00058729	kelch motif family protein, putative, expressed
LOC_Os01g19610.1	76.7497	96.4133	0	1.17621	147.221	2.03e-05	plant protein of unknown function domain containing protein, expressed
LOC_Os01g19694.1	44.1311	77.3549	4.73108	1.17621	20.5654	0.000581233	Homeobox domain containing protein, expressed
LOC_Os01g19800.1	687.869	512.336	3658.3	4333.15	0.150186	0.00605059	zinc finger, C3HC4 type, putative, expressed
LOC_Os01g19820.1	491.198	561.664	3938.62	4369.62	0.126725	0.00212999	universal stress protein domain containing protein, putative, expressed
LOC_Os01g19820.2	123.759	85.2025	811.379	843.342	0.126282	0.00293431	universal stress protein domain containing protein, putative, expressed
LOC_Os01g19850.1	46.0498	34.7536	0	2.35242	34.3491	0.0140538	amino acid permease family protein, putative, expressed
LOC_Os01g19940.1	857.678	818.392	46.128	25.8766	23.2773	5.71e-06	expressed protein
LOC_Os01g19990.1	43.1717	42.6012	0	2.35242	36.4616	0.00166235	expressed protein
LOC_Os01g20980.1	89.2215	32.5115	7418.33	8264.04	0.00776241	2.24e-11	pectinesterase, putative, expressed
LOC_Os01g21070.1	506.548	784.76	112.363	114.092	5.70226	0.0157651	endoglucanase, putative, expressed
LOC_Os01g21120.1	626.469	578.48	14209.8	19921.5	0.0353034	6.23e-07	AP2 domain containing protein, expressed
LOC_Os01g21160.1	1236.63	1094.18	243.65	277.585	4.4717	0.0413575	2-oxo acid dehydrogenases acyltransferase domain containing protein, expressed
LOC_Os01g21300.1	173.646	184.979	5.91384	2.35242	43.3842	5.83e-06	esterase/lipase/thioesterase family protein, putative, expressed
LOC_Os01g21310.1	764.619	918.169	60.3212	23.5242	20.0701	1.4e-05	expressed protein
LOC_Os01g21630.1	342.496	380.048	7.09661	2.35242	76.4675	7.88e-08	pectinacetylesterase domain containing protein, expressed
LOC_Os01g22090.1	0	0	16.5588	14.1145	0	0.0196815	expressed protein
LOC_Os01g22249.1	1445.77	414.802	31292.5	32004.6	0.0293943	2.24e-07	peroxidase precursor, putative, expressed
LOC_Os01g22352.1	678.275	763.459	2.36554	2.35242	305.585	1.03e-11	peroxidase precursor, putative, expressed
LOC_Os01g22380.1	26.8624	61.6597	3.54831	1.17621	18.7368	0.00330092	expressed protein
LOC_Os01g22640.1	3098.77	3550.48	29.5692	27.0528	117.432	5.8e-11	GDSL-like lipase/acylhydrolase, putative, expressed
LOC_Os01g22780.1	306.039	319.509	2.36554	0	264.442	1.45e-09	GDSL-like lipase/acylhydrolase, putative, expressed
LOC_Os01g22780.2	30.6999	26.906	0	0	4365	0.00549404	GDSL-like lipase/acylhydrolase, putative, expressed
LOC_Os01g22980.1	193.793	236.549	3.54831	2.35242	72.9304	1.92e-07	OsSCP3 - Putative Serine Carboxypeptidase homologue, expressed
LOC_Os01g24030.1	3.83748	6.72651	100.535	138.793	0.0441402	3.65e-05	AMP-binding enzyme, putative, expressed
LOC_Os01g24540.1	3.83748	1.12109	78.0627	55.2818	0.0371861	0.00270324	transposon protein, putative, CACTA, En/Spm sub-class, expressed
LOC_Os01g24550.1	387.586	53.8121	16284.4	15734.1	0.0137857	1.26e-09	fruit bromelain precursor, putative, expressed
LOC_Os01g24560.1	432.676	81.8392	34219.9	34405.3	0.00749748	1.44e-11	fruit bromelain precursor, putative, expressed
LOC_Os01g24570.1	63.3185	11.2109	5659.55	5475.25	0.00669337	1.14e-11	fruit bromelain precursor, putative, expressed
LOC_Os01g24600.1	147.743	35.8747	7148.66	7113.71	0.0128743	8.59e-10	fruit bromelain precursor, putative, expressed
LOC_Os01g24700.1	6833.6	2394.64	33691.2	35241.6	0.133873	0.00347104	expressed protein
LOC_Os01g25010.1	51.806	42.6012	0	0	4365	1.88e-05	flavonol synthase/flavanone 3-hydroxylase, putative, expressed
LOC_Os01g25990.2	500.792	467.493	63.8695	36.4625	9.6508	0.0010639	expressed protein
LOC_Os01g27050.1	38.3748	39.238	0	0	4365	0.0027729	flavin-containing monooxygenase family protein, putative, expressed
LOC_Os01g27190.1	62.3591	100.898	5.91384	2.35242	19.7498	0.0010053	C2 domain containing protein, putative, expressed
LOC_Os01g27230.1	298.364	294.845	56.7729	63.5153	4.93157	0.0409793	12-oxophytodienoate reductase, putative, expressed
LOC_Os01g27340.1	94.9778	113.23	1.18277	4.70484	35.3637	0.000329608	glutathione S-transferase, putative, expressed
LOC_Os01g27360.1	612.079	811.666	117.094	128.207	5.80407	0.0160012	glutathione S-transferase, putative, expressed
LOC_Os01g28500.1	74.831	44.8434	0	0	4365	1.23e-05	SCP-like extracellular protein, expressed
LOC_Os01g28730.1	259.03	227.58	1095.24	1097.4	0.221928	0.0418645	protein kinase domain containing protein, expressed
LOC_Os01g28790.1	2830.15	1687.23	9287.1	10945.8	0.223269	0.0411819	PRAS-rich protein, putative, expressed
LOC_Os01g29330.1	31.6593	44.8434	7.09661	0	10.7802	0.0182011	expressed protein
LOC_Os01g29910.1	8.63434	10.0898	80.4283	76.4536	0.119352	0.0190511	retrotransposon protein, putative, unclassified, expressed
LOC_Os01g30956.1	72.9122	81.8392	364.293	366.977	0.21162	0.0413575	retrotransposon protein, putative, unclassified, expressed
LOC_Os01g31370.1	1246.22	919.29	6194.16	6364.47	0.172432	0.011989	glycosyltransferase, putative, expressed
LOC_Os01g31940.1	126.637	117.714	486.118	617.51	0.221407	0.0457033	purine permease, putative, expressed
LOC_Os01g32460.1	606.323	868.841	4.73108	0	311.803	6.53e-12	expressed protein
LOC_Os01g32830.1	88.2622	136.772	5.91384	2.35242	27.2233	0.000105802	expressed protein
LOC_Os01g32920.1	19.1874	33.6326	0	0	4365	0.00831142	ZOS1-08 - C2H2 zinc finger protein, expressed
LOC_Os01g33040.1	2257.4	2803.83	87.5249	61.1629	34.0393	2.44e-07	kinesin motor domain containing protein, expressed
LOC_Os01g33160.1	157.337	183.858	0	0	4365	2.79e-08	stress responsive A/B Barrel domain containing protein, expressed
LOC_Os01g33360.1	3.83748	2.24217	65.0523	111.74	0.0343887	0.000559216	DnaK family protein, putative, expressed
LOC_Os01g33810.1	0	0	17.7415	18.8193	0	0.00804749	disease resistance protein RPM1, putative, expressed
LOC_Os01g36070.1	1404.52	1037	8156.37	8241.7	0.148891	0.00555565	nodulin MtN3 family protein, putative, expressed
LOC_Os01g36220.1	302.202	258.971	1735.12	2104.24	0.146163	0.00540198	bZIP transcription factor domain containing protein, expressed
LOC_Os01g36294.1	23.0249	67.2651	0	0	4365	0.00142914	cytochrome P450, putative, expressed
LOC_Os01g36350.1	47.0092	56.0543	0	0	4365	0.000346434	cytochrome P450, putative, expressed
LOC_Os01g36460.1	343.455	475.34	2.36554	12.9383	53.5026	1.69e-07	MYB family transcription factor, putative, expressed
LOC_Os01g36550.1	42.2123	19.0584	173.867	272.88	0.137149	0.0143766	protein kinase family protein, putative, expressed
LOC_Os01g36580.1	13.4312	16.8163	96.9871	92.9205	0.159275	0.0217635	auxin-induced protein 5NG4, putative, expressed
LOC_Os01g36720.1	0	4.48434	68.6006	43.5197	0.0399958	0.00506281	transporter, major facilitator family, putative, expressed
LOC_Os01g36790.1	149.662	133.409	22.4726	17.6431	7.05636	0.0172153	TKL_IRAK_DUF26-lf.2 - DUF26 kinases have homology to DUF26 containing loci, expressed
LOC_Os01g37000.1	8.63434	71.7495	0	0	4365	1.43e-05	carboxyl-terminal peptidase, putative, expressed
LOC_Os01g37460.1	25.903	25.785	0	0	4365	0.0151556	zinc finger family protein, putative, expressed
LOC_Os01g37590.1	212.98	218.612	0	2.35242	183.467	1.17e-07	peptide transporter PTR2, putative, expressed
LOC_Os01g37630.1	58.5216	54.9332	3.54831	8.23346	9.62969	0.00978091	esterase, putative, expressed
LOC_Os01g37650.1	27.8218	29.1482	2.36554	0	24.0833	0.0147972	esterase, putative, expressed
LOC_Os01g37690.1	1634.77	1819.52	228.274	249.356	7.23214	0.00393198	sodium/calcium exchanger protein, putative, expressed
LOC_Os01g37910.1	1993.57	1812.79	259.026	232.889	7.73785	0.00255863	vacuolar-processing enzyme precursor, putative, expressed
LOC_Os01g38110.1	19.1874	38.1169	0	0	4365	0.012291	cytochrome P450, putative, expressed
LOC_Os01g38140.1	35.4967	10.0898	152.577	122.326	0.165828	0.0356447	retrotransposon protein, putative, unclassified, expressed
LOC_Os01g38229.1	3447.98	3945.1	36.6658	18.8193	133.244	1.87e-11	peptidyl-prolyl isomerase, putative, expressed
LOC_Os01g38229.2	397.18	459.645	4.73108	5.88104	80.7402	1.67e-08	peptidyl-prolyl isomerase, putative, expressed
LOC_Os01g38359.1	364.561	392.38	0	7.05725	107.257	3.04e-09	peptidyl-prolyl cis-trans isomerase, FKBP-type, putative, expressed
LOC_Os01g38580.1	62.3591	125.562	3.54831	2.35242	31.847	0.000109436	beta,beta-carotene 9,10-dioxygenase, putative, expressed
LOC_Os01g39000.1	1433.3	1144.63	8161.11	8776.87	0.152198	0.00612557	ZmGR2c, putative, expressed
LOC_Os01g39000.3	473.929	260.092	3114.23	2747.62	0.12522	0.00248196	ZmGR2c, putative, expressed
LOC_Os01g39330.1	507.507	395.743	3281	2966.4	0.14458	0.00495466	helix-loop-helix DNA-binding domain containing protein, expressed
LOC_Os01g39860.1	1760.45	1072.88	10889.8	12025.6	0.123643	0.00204612	1-aminocyclopropane-1-carboxylate oxidase protein, putative, expressed
LOC_Os01g40200.1	1079.29	853.146	6359.75	6907.88	0.145651	0.00487558	XIK, putative, expressed
LOC_Os01g40280.1	708.975	604.265	3037.35	3049.91	0.215736	0.0344994	integral membrane protein, putative, expressed
LOC_Os01g40870.1	1234.71	604.265	5104.83	4420.19	0.193068	0.0223657	aldehyde dehydrogenase, putative, expressed
LOC_Os01g41120.1	1529.24	1042.61	19577.2	20876.5	0.063575	3.48e-05	retrotransposon protein, putative, Ty3-gypsy subclass, expressed
LOC_Os01g41200.1	47.9686	44.8434	0	0	4365	0.000342014	heavy metal-associated domain containing protein, expressed
LOC_Os01g41240.1	287.811	226.459	6091.26	7200.75	0.0386902	1.41e-06	hydrolase, alpha/beta fold family domain containing protein, expressed
LOC_Os01g41290.1	19.1874	20.1795	93.4387	155.26	0.158292	0.0371268	OsFBD5 - F-box and FBD domain containing protein, expressed
LOC_Os01g41430.1	502.711	229.822	2050.92	2550.02	0.159214	0.00942761	UDP-glucoronosyl and UDP-glucosyl transferase, putative, expressed
LOC_Os01g41660.1	433.636	452.918	2059.2	2488.86	0.19493	0.0215774	phosphoethanolamine/phosphocholine phosphatase, putative, expressed
LOC_Os01g41730.1	251.355	273.545	55.5901	43.5197	5.29614	0.031187	serine/threonine-protein kinase, putative, expressed
LOC_Os01g41770.1	64.2779	50.4488	2114.79	1973.68	0.028061	2.08e-07	leucine rich repeat protein, putative, expressed
LOC_Os01g41810.1	96.8965	116.593	8.27938	1.17621	22.5781	0.000130034	cytochrome P450 72A1, putative, expressed
LOC_Os01g42070.1	1010.22	1344.18	36.6658	49.4008	27.3555	1.61e-06	kinesin motor domain containing protein, putative, expressed
LOC_Os01g42090.1	31.6593	41.4802	2.36554	2.35242	15.5023	0.00530012	nodulin MtN3 family protein, putative, expressed
LOC_Os01g42200.1	109.368	118.835	0	3.52863	64.672	1.93e-05	expressed protein
LOC_Os01g42330.1	44.1311	17.9374	231.823	242.299	0.130912	0.00822613	retrotransposon protein, putative, unclassified, expressed
LOC_Os01g42460.1	656.21	748.885	108.815	141.145	5.62128	0.0177579	BAH domain containing protein, expressed
LOC_Os01g42520.1	10137.7	10326.3	47032.8	57704.8	0.195383	0.0201783	expressed protein
LOC_Os01g42780.1	81.5466	133.409	0	1.17621	182.753	1.74e-06	cysteine proteinase EP-B 2 precursor, putative, expressed
LOC_Os01g42800.1	475.848	406.954	75.6972	104.683	4.89413	0.036947	MEE18, putative, expressed
LOC_Os01g42900.1	177.484	226.459	3.54831	2.35242	68.4565	5e-07	ABC-2 type transporter domain containing protein, expressed
LOC_Os01g43090.1	891.256	1141.26	176.233	152.907	6.17525	0.0100308	oxidoreductase, aldo/keto reductase family protein, putative, expressed
LOC_Os01g43270.1	215.859	278.029	0	0	4365	8.69e-10	hydroquinone glucosyltransferase, putative, expressed
LOC_Os01g43340.1	47.9686	40.3591	0	0	4365	0.00038254	retrotransposon protein, putative, unclassified, expressed
LOC_Os01g43350.1	361.683	367.716	7.09661	8.23346	47.5796	4.91e-07	protein kinase family protein, putative, expressed
LOC_Os01g43440.1	34.5374	99.7766	4.73108	5.88104	12.6567	0.00619126	TOO MANY MOUTHS precursor, putative, expressed
LOC_Os01g43460.1	73.8716	65.0229	0	7.05725	19.6811	0.000705721	C4-dicarboxylate transporter/malic acid transport protein, expressed
LOC_Os01g43510.1	49.8873	56.0543	2.36554	10.5859	8.17992	0.034561	expressed protein
LOC_Os01g43844.1	795.319	734.311	3571.96	3992.05	0.202225	0.0252312	cytochrome P450 72A1, putative, expressed
LOC_Os01g43950.1	193.793	191.706	1412.23	1739.61	0.122309	0.00210214	expressed protein
LOC_Os01g44069.1	1204.97	1347.54	0	2.35242	1085.06	1.57e-14	glycerol-3-phosphate acyltransferase, putative, expressed
LOC_Os01g44220.1	608.241	471.977	22.4726	10.5859	32.676	1.83e-06	glucose-1-phosphate adenylyltransferase large subunit, chloroplast precursor, putative, expressed
LOC_Os01g44220.2	35.4967	40.3591	2.36554	1.17621	21.4176	0.0265948	glucose-1-phosphate adenylyltransferase large subunit, chloroplast precursor, putative, expressed
LOC_Os01g44330.1	34.5374	40.3591	203.436	192.898	0.188973	0.0405978	laccase precursor protein, putative, expressed
LOC_Os01g44394.1	548.76	829.603	164.405	129.383	4.6917	0.0391627	mitotic checkpoint protein, putative, expressed
LOC_Os01g44960.1	746.391	899.11	9.46215	24.7004	48.1668	9.18e-08	hydrolase, alpha/beta fold family domain containing protein, expressed
LOC_Os01g44970.1	997.746	847.54	59.1384	36.4625	19.302	1.45e-05	polygalacturonase, putative, expressed
LOC_Os01g45140.1	32.6186	63.9019	0	2.35242	41.0303	0.00206782	anthocyanin 3-O-beta-glucosyltransferase, putative, expressed
LOC_Os01g45380.1	219.696	190.584	17.7415	30.5814	8.49038	0.0056418	protein kinase domain containing protein, expressed
LOC_Os01g45550.1	846.165	1045.97	185.695	242.299	4.42095	0.0452248	auxin efflux carrier component, putative, expressed
LOC_Os01g45570.1	14.3906	28.0271	2.36554	0	17.9315	0.0331063	homeobox associated leucine zipper, putative, expressed
LOC_Os01g45659.1	419.245	142.378	0	1.17621	477.486	2.3e-09	expressed protein
LOC_Os01g45670.1	142.946	114.351	576.008	593.986	0.219913	0.0453508	expressed protein
LOC_Os01g45700.1	3252.27	2876.7	13509.6	17153.8	0.199879	0.0232319	expressed protein
LOC_Os01g45720.1	748.31	470.856	5984.81	7501.86	0.0903978	0.000334655	expressed protein
LOC_Os01g45760.1	25.903	29.1482	0	0	4365	0.00220513	YUC4, putative, expressed
LOC_Os01g45900.1	90.1809	113.23	15.376	16.4669	6.38793	0.0266479	OsFBX20 - F-box domain containing protein, expressed
LOC_Os01g46120.1	848.084	897.989	2.36554	0	738.13	5.09e-13	GDSL-like lipase/acylhydrolase, putative, expressed
LOC_Os01g46120.2	23.0249	20.1795	0	0	4365	0.0381337	GDSL-like lipase/acylhydrolase, putative, expressed
LOC_Os01g46130.1	167.89	225.338	11.8277	28.229	9.81679	0.00371493	expressed protein
LOC_Os01g46140.1	83.4653	115.472	1.18277	2.35242	56.2734	7.85e-05	expressed protein
LOC_Os01g46660.1	1.91874	3.36326	66.2351	69.3963	0.0389438	0.00286444	transposon protein, putative, unclassified, expressed
LOC_Os01g46870.1	98.8152	150.225	15.376	25.8766	6.03697	0.0309543	AP2 domain containing protein, expressed
LOC_Os01g47180.1	29.7405	50.4488	0	7.05725	11.3627	0.0252672	3-5 exonuclease domain-containing protein, putative, expressed
LOC_Os01g47190.1	75.7903	121.077	16.5588	3.52863	9.80055	0.0159673	phosphoglycerate mutase, putative, expressed
LOC_Os01g47270.1	141.028	183.858	35.4831	17.6431	6.11535	0.0217752	DUF1645 domain containing protein, putative, expressed
LOC_Os01g47400.1	3832.69	4361.02	863.421	765.712	5.02949	0.0229739	OsMan01 - Endo-Beta-Mannanase, expressed
LOC_Os01g47570.1	20.1468	19.0584	211.716	517.532	0.0537612	7.02e-05	expressed protein
LOC_Os01g47780.1	5535.57	5700.72	29820	36117.8	0.170407	0.0102082	fasciclin domain containing protein, expressed
LOC_Os01g48000.1	346.333	327.357	2285.11	2653.53	0.136412	0.0035394	S-locus-like receptor protein kinase, putative, expressed
LOC_Os01g48040.1	54.6842	58.2964	294.509	270.528	0.199952	0.0373978	S-locus-like receptor protein kinase, putative, expressed
LOC_Os01g48130.1	948.818	1014.58	57.9557	94.0967	12.9127	0.000179675	no apical meristem protein, putative, expressed
LOC_Os01g48530.1	71.9528	39.238	690.737	824.523	0.0733807	0.000192051	expressed protein
LOC_Os01g48570.1	50.8467	62.7808	0	0	4365	3.09e-05	expressed protein
LOC_Os01g48740.1	43.1717	70.6284	659.985	943.32	0.0709784	0.000118455	aspartyl protease family protein, putative, expressed
LOC_Os01g48750.1	215.859	225.338	2792.52	3459.23	0.0705717	7.32e-05	aspartic proteinase nepenthesin-2 precursor, putative, expressed
LOC_Os01g49120.1	343.455	297.088	68.6006	57.6342	5.07421	0.0323108	MATE efflux family protein, putative, expressed
LOC_Os01g49200.1	2479.02	3038.14	217.629	254.061	11.6966	0.000240149	microtubule associated protein, putative, expressed
LOC_Os01g49230.1	70.9935	91.929	1.18277	2.35242	46.086	0.000357927	limonoid UDP-glucosyltransferase, putative, expressed
LOC_Os01g49240.1	13.4312	4.48434	838.583	997.425	0.00975787	1.32e-09	limonoid UDP-glucosyltransferase, putative, expressed
LOC_Os01g49640.1	11.5125	13.453	1.18277	0	21.1077	0.0491586	LTPL149 - Protease inhibitor/seed storage/LTP family protein precursor, expressed
LOC_Os01g50050.1	137.19	154.71	29.5692	19.9956	5.88926	0.0333686	polyprenyl synthetase, putative, expressed
LOC_Os01g50080.1	32.6186	40.3591	0	0	4365	0.000464472	MDR-like ABC transporter, putative, expressed
LOC_Os01g50370.1	363.602	211.885	1063.31	1900.75	0.194155	0.0245371	STE_MEKK_ste11_MAP3K.4 - STE kinases include homologs to sterile 7, sterile 11 and sterile 20 from yeast, expressed
LOC_Os01g50410.1	976.64	594.175	3176.92	4462.54	0.205619	0.0294224	STE_MEKK_ste11_MAP3K.6 - STE kinases include homologs to sterile 7, sterile 11 and sterile 20 from yeast, expressed
LOC_Os01g50440.1	155.418	155.831	656.437	1000.95	0.187795	0.0218089	AWPM-19-like membrane family protein, putative, expressed
LOC_Os01g50460.1	194.752	179.374	22.4726	19.9956	8.80956	0.00261055	nodulin MtN3 family protein, putative, expressed
LOC_Os01g50720.1	490.239	476.461	42.5797	50.577	10.3771	0.000717227	MYB family transcription factor, putative, expressed
LOC_Os01g50750.1	301.243	275.787	30.752	35.2863	8.73781	0.00320914	zinc finger, C3HC4 type domain containing protein, expressed
LOC_Os01g50820.1	420.205	146.862	1439.43	1240.9	0.211566	0.0373701	transporter, major facilitator family, putative, expressed
LOC_Os01g51230.1	168.849	220.854	29.5692	42.3435	5.41911	0.0312221	IQ calmodulin-binding motif domain containing protein, expressed
LOC_Os01g51260.1	24.9437	29.1482	0	0	4365	0.0104185	MYB family transcription factor, putative, expressed
LOC_Os01g51310.1	46.0498	39.238	251.93	342.277	0.143532	0.0109356	expressed protein
LOC_Os01g51400.1	27.8218	35.8747	0	2.35242	27.077	0.0226876	Leucine Rich Repeat family protein, expressed
LOC_Os01g51490.1	0	1.12109	22.4726	42.3435	0.0172964	0.000440448	expressed protein
LOC_Os01g51520.1	2.87811	0	50.8591	47.0484	0.0293963	0.00201259	expressed protein
LOC_Os01g51570.1	6306.91	4958.56	54589.5	47444.7	0.110409	0.000990084	glycosyl hydrolases family 17, putative, expressed
LOC_Os01g51870.1	640.86	690.588	98.1698	139.969	5.59106	0.0172681	methyltransferase, putative, expressed
LOC_Os01g51920.1	5067.4	4414.83	1155.57	1098.58	4.20658	0.0494498	phosphotransferase, putative, expressed
LOC_Os01g51980.1	472.011	625.566	9.46215	1.17621	103.172	5.11e-09	alliin lyase precursor, putative, expressed
LOC_Os01g52010.1	4537.83	5519.1	127.739	122.326	40.2173	6.64e-08	alliin lyase precursor, putative, expressed
LOC_Os01g52100.1	101.693	152.468	2.36554	2.35242	53.871	6.38e-06	DUF581 domain containing protein, expressed
LOC_Os01g52130.1	447.067	498.883	5.91384	0	159.955	7.7e-10	sulfate transporter, putative, expressed
LOC_Os01g52180.1	19.1874	12.3319	205.802	196.427	0.0783618	0.00126864	lipase, putative, expressed
LOC_Os01g52260.1	779.969	539.242	4751.18	4900.09	0.136688	0.00353203	serine acetyltransferase protein, putative, expressed
LOC_Os01g52330.1	26.8624	15.6952	2.36554	0	17.9907	0.0131784	NB-ARC domain containing protein, expressed
LOC_Os01g52514.1	28.7811	40.3591	0	0	4365	0.00286444	B3 DNA binding domain containing protein, expressed
LOC_Os01g52660.1	28.7811	14.5741	0	0	4365	0.0063724	POEI51 - Pollen Ole e I allergen and extensin family protein precursor, expressed
LOC_Os01g52680.1	29.7405	44.8434	1.18277	0	63.0587	0.00197931	OsMADS32 - MADS-box family gene with MIKCc type-box, expressed
LOC_Os01g52690.1	665.804	838.572	107.632	54.1056	9.30133	0.00122657	retrotransposon protein, putative, unclassified, expressed
LOC_Os01g52750.1	2164.34	2041.5	59.1384	76.4536	31.0183	4.88e-07	OsSub3 - Putative Subtilisin homologue, expressed
LOC_Os01g52790.1	108.409	118.835	7.09661	2.35242	24.0494	0.000100335	cytochrome P450 72A1, putative, expressed
LOC_Os01g52880.1	45.0904	132.288	3.54831	1.17621	37.5443	4.1e-05	leucine-rich repeat family protein, putative, expressed
LOC_Os01g52900.1	5.75623	10.0898	164.405	616.334	0.0202962	1.55e-07	expressed protein
LOC_Os01g53010.1	0	0	39.0314	43.5197	0	0.000132108	hypothetical protein
LOC_Os01g53090.1	346.333	230.944	2.36554	0	244.036	7.11e-09	pathogen-related protein, putative, expressed
LOC_Os01g53240.1	4493.69	6026.95	922.56	992.72	5.49301	0.0154832	BURP domain containing protein, expressed
LOC_Os01g53260.1	77.7091	108.745	2.36554	0	78.8211	1.43e-05	WRKY23, expressed
LOC_Os01g53390.1	288.771	269.06	1154.38	1278.54	0.229284	0.0468436	glucosyltransferase, putative, expressed
LOC_Os01g53430.1	72.9122	52.691	1606.2	1646.69	0.0386128	2.03e-06	anthocyanidin 5,3-O-glucosyltransferase, putative, expressed
LOC_Os01g53440.1	2.87811	2.24217	33.1175	27.0528	0.0850965	0.0314627	expressed protein
LOC_Os01g53790.1	377.033	362.111	3276.27	3936.77	0.102473	0.000689756	stress-induced protein, putative, expressed
LOC_Os01g54090.1	44.1311	44.8434	340.637	406.968	0.119013	0.00325773	expressed protein
LOC_Os01g54210.1	394.302	562.785	74.5144	91.7443	5.75661	0.0159673	GATA zinc finger domain containing protein, expressed
LOC_Os01g54230.1	0	0	89.8904	96.4491	0	4.3e-06	expressed protein
LOC_Os01g54470.1	231.208	352.021	52.0418	59.9867	5.20608	0.0352359	GDSL-like lipase/acylhydrolase, putative, expressed
LOC_Os01g54620.1	7713.34	7356.56	623.319	655.148	11.7875	0.000196686	CESA4 - cellulose synthase, expressed
LOC_Os01g54700.1	397.18	294.845	2228.34	2437.11	0.14833	0.00589813	retrotransposon protein, putative, unclassified, expressed
LOC_Os01g55100.1	1369.02	1741.05	152.577	152.907	10.1808	0.000566297	slTCP3, putative, expressed
LOC_Os01g55150.1	795.319	883.415	4576.13	5592.87	0.165083	0.00888592	bZIP transcription factor domain containing protein, expressed
LOC_Os01g55190.1	3147.7	4112.14	856.325	786.884	4.41809	0.042071	expressed protein
LOC_Os01g55220.1	51.806	86.3236	2.36554	1.17621	39.0004	0.000216924	expressed protein
LOC_Os01g55240.1	189.956	152.468	1798.99	2560.61	0.0785446	0.000161184	gibberellin 2-beta-dioxygenase, putative, expressed
LOC_Os01g55260.1	2001.25	2029.16	146.663	150.555	13.5605	0.000104062	AAA-type ATPase family protein, putative, expressed
LOC_Os01g55500.1	1322.01	2002.26	320.53	381.092	4.73798	0.032763	nucleobase-ascorbate transporter, putative, expressed
LOC_Os01g55510.1	1498.54	1229.83	6525.34	7459.52	0.195095	0.0213134	dynein light chain type 1 domain containing protein, expressed
LOC_Os01g55590.1	3549.67	3325.14	766.434	577.519	5.11537	0.0206811	AMP-binding enzyme, putative, expressed
LOC_Os01g55600.1	25.903	32.5115	0	0	4365	0.00270349	peptide transporter PTR2, putative, expressed
LOC_Os01g55750.1	1382.45	1654.72	36.6658	12.9383	61.2283	6.28e-09	TCP family transcription factor, putative, expressed
LOC_Os01g55750.2	319.471	329.599	5.91384	4.70484	61.1253	1.21e-07	TCP family transcription factor, putative, expressed
LOC_Os01g55750.3	287.811	360.989	4.73108	5.88104	61.1377	1.3e-07	TCP family transcription factor, putative, expressed
LOC_Os01g55820.1	223.534	171.526	2914.34	3979.12	0.0573093	2.03e-05	X8 domain containing protein, expressed
LOC_Os01g55830.1	17035.6	16684	3791.96	3589.79	4.56796	0.0338594	glutathione S-transferase, putative, expressed
LOC_Os01g55890.1	535.329	642.382	114.729	74.1012	6.23689	0.0111721	amino acid kinase, putative, expressed
LOC_Os01g56020.1	414.448	532.515	26.0209	19.9956	20.5788	1.85e-05	expressed protein
LOC_Os01g56370.1	436.514	525.789	39.0314	58.8104	9.83529	0.00145384	wax synthase, putative, expressed
LOC_Os01g56420.1	154.459	42.6012	1230.08	1231.49	0.0800546	0.000250161	ctr copper transporter family protein, putative, expressed
LOC_Os01g56510.1	444.189	559.422	36.6658	55.2818	10.915	0.000742524	periplasmic beta-glucosidase precursor, putative, expressed
LOC_Os01g56510.2	59.481	93.0501	1.18277	17.6431	8.10219	0.0347283	periplasmic beta-glucosidase precursor, putative, expressed
LOC_Os01g56570.1	97.8559	79.597	987.612	1033.89	0.0877828	0.000426603	xylosyltransferase, putative, expressed
LOC_Os01g56810.1	381.83	353.142	3516.37	4188.48	0.0953907	0.000441522	cytokinin dehydrogenase precursor, putative, expressed
LOC_Os01g57004.1	133.353	93.0501	1032.56	1257.37	0.098869	0.000731104	adhesive/proline-rich protein, putative, expressed
LOC_Os01g57040.1	116.084	49.3277	357.196	879.804	0.13372	0.00532388	expressed protein
LOC_Os01g57050.1	90.1809	96.4133	4.73108	7.05725	15.8287	0.00330092	expressed protein
LOC_Os01g57370.1	20.1468	52.691	1.18277	0	61.5824	0.00478928	cyclic nucleotide-gated ion channel 2, putative, expressed
LOC_Os01g57440.1	71.9528	62.7808	371.389	430.492	0.168022	0.0160047	DNA repair metallo-beta-lactamase, putative, expressed
LOC_Os01g57570.1	9440.21	9140.21	1581.36	1705.5	5.65293	0.0123655	NADPH-dependent FMN reductase domain containing protein, expressed
LOC_Os01g57690.1	310.836	360.989	52.0418	58.8104	6.06055	0.0152621	early nodulin 20 precursor, putative, expressed
LOC_Os01g57890.1	22.0655	19.0584	0	2.35242	17.4816	0.0240943	Homeobox domain containing protein, expressed
LOC_Os01g58140.1	1377.66	687.225	6707.48	10556.5	0.119607	0.00177002	expressed protein
LOC_Os01g58150.1	568.907	340.81	1694.91	2600.6	0.211783	0.0344557	expressed protein
LOC_Os01g58300.1	0	0	14.1932	29.4052	0	0.013823	expressed protein
LOC_Os01g58310.1	13.4312	21.3006	140.75	255.237	0.0877095	0.00165342	expressed protein
LOC_Os01g58335.1	10.5531	5.60543	60.3212	75.2774	0.119164	0.0222633	expressed protein
LOC_Os01g58550.1	6195.62	5450.72	32323.9	32336.3	0.180116	0.0140909	methyladenine glycosylase, putative, expressed
LOC_Os01g58550.2	108.409	96.4133	708.479	544.585	0.163457	0.0127181	methyladenine glycosylase, putative, expressed
LOC_Os01g58640.1	134.312	108.745	866.97	825.699	0.143594	0.00611213	nucleotide pyrophosphatase/phosphodiesterase, putative, expressed
LOC_Os01g58670.1	4.79686	15.6952	76.88	164.669	0.0848359	0.00104201	expressed protein
LOC_Os01g58910.1	291.649	323.994	0	0	4365	1e-10	auxin-induced protein 5NG4, putative, expressed
LOC_Os01g59120.1	1901.47	2571.77	179.781	154.083	13.3984	0.00010887	cyclin, putative, expressed
LOC_Os01g59190.1	111.287	121.077	641.061	856.28	0.155185	0.00810774	expressed protein
LOC_Os01g59680.1	8.63434	2.24217	210.533	195.251	0.0268037	1.21e-05	NHL25, putative, expressed
LOC_Os01g59819.1	681.154	594.175	60.3212	91.7443	8.38671	0.00265128	Os1bglu2 - beta-glucosidase homologue, similar to G. max isohydroxyurate hydrolase, expressed
LOC_Os01g59840.1	1300.91	889.021	6670.82	7439.52	0.1552	0.00699458	Os1bglu3 - beta-glucosidase homologue, similar to G. max isohydroxyurate hydrolase, expressed
LOC_Os01g60120.1	511.345	442.829	29.5692	28.229	16.5087	7.82e-05	transmembrane protein 56, putative, expressed
LOC_Os01g60120.2	80.5872	117.714	10.6449	3.52863	13.9909	0.00350396	transmembrane protein 56, putative, expressed
LOC_Os01g60120.3	101.693	132.288	9.46215	5.88104	15.2498	0.00148368	transmembrane protein 56, putative, expressed
LOC_Os01g60340.1	85.384	49.3277	7.09661	7.05725	9.51767	0.0213054	NTMC2Type1.1 protein, putative, expressed
LOC_Os01g60670.1	1501.42	1865.49	325.261	375.211	4.80662	0.0297462	receptor-like protein kinase precursor, putative, expressed
LOC_Os01g60740.1	14813.7	20096.6	1868.77	1307.94	10.9894	0.000306635	LTPL16 - Protease inhibitor/seed storage/LTP family protein precursor, expressed
LOC_Os01g60810.1	270.543	315.025	26.0209	16.4669	13.782	0.000315764	DUF623 domain containing protein, expressed
LOC_Os01g60850.1	25.903	31.3904	1.18277	4.70484	9.73119	0.0200377	expressed protein
LOC_Os01g60940.1	106.49	180.495	0	3.52863	81.3305	5.03e-06	expressed protein
LOC_Os01g61080.1	493.117	313.904	1757.59	1859.59	0.223108	0.0436413	WRKY24, expressed
LOC_Os01g61160.1	1107.11	1023.55	26.0209	22.348	44.0503	7.25e-08	laccase precursor protein, putative, expressed
LOC_Os01g61200.1	303.161	248.881	1801.36	2025.43	0.144257	0.0051612	GDSL-like lipase/acylhydrolase, putative, expressed
LOC_Os01g61210.1	0	0	31.9348	34.1101	0	0.000994095	bet v I allergen family protein, putative, expressed
LOC_Os01g61370.1	99.7746	142.378	1.18277	0	204.734	7.35e-07	expressed protein
LOC_Os01g61410.1	531.492	507.852	62.6868	123.502	5.5822	0.0194661	NADH-ubiquinone oxidoreductase, mitochondrial precursor, putative, expressed
LOC_Os01g61610.1	23.9843	33.6326	1.18277	0	48.7135	0.0210768	flavonol synthase/flavanone 3-hydroxylase, putative, expressed
LOC_Os01g61620.1	544.923	641.261	150.212	108.211	4.59009	0.0430789	protein kinase family protein, putative, expressed
LOC_Os01g61700.1	25.903	35.8747	0	1.17621	52.5228	0.0233605	ATP-dependent Clp protease adaptor protein ClpS containing protein, expressed
LOC_Os01g61940.1	335.78	417.044	2.36554	0	318.246	2.48e-10	white-brown complex homolog protein, putative, expressed
LOC_Os01g62060.1	197.63	199.553	2.36554	0	167.904	1.27e-07	plant-specific domain TIGR01589 family protein, expressed
LOC_Os01g62070.1	922.915	705.163	82.7938	79.9822	10.0019	0.000751175	cation efflux family protein, putative, expressed
LOC_Os01g62200.1	194.752	300.451	5.91384	9.40967	32.3166	3.79e-06	domain of unknown function DUF966 domain containing protein, expressed
LOC_Os01g62260.1	1490.86	2310.56	133.653	239.947	10.1751	0.000560224	thaumatin, putative, expressed
LOC_Os01g62430.1	345.374	183.858	1693.73	1582	0.161562	0.0104127	C2 domain containing protein, putative, expressed
LOC_Os01g62500.1	81.5466	103.14	16.5588	12.9383	6.26118	0.0413725	OsFtsH3 FtsH protease, homologue of AtFtsH3/10, expressed
LOC_Os01g62600.1	48.9279	86.3236	0	1.17621	114.989	4.78e-05	laccase precursor protein, putative, expressed
LOC_Os01g62640.1	14.3906	29.1482	0	1.17621	37.0162	0.0223342	zinc finger, C3HC4 type domain containing protein, expressed
LOC_Os01g62760.1	1293.23	1354.27	128.922	199.956	8.05012	0.00239893	protein phosphatase 2C, putative, expressed
LOC_Os01g62870.1	2016.6	1873.33	172.684	181.136	10.9941	0.000359842	oxidoreductase, aldo/keto reductase family protein, putative, expressed
LOC_Os01g62880.1	496.954	429.376	91.0732	83.5108	5.30593	0.0244343	oxidoreductase, aldo/keto reductase family protein, putative, expressed
LOC_Os01g62900.1	577.541	737.674	3.54831	7.05725	124.012	1.3e-09	amino acid kinase, putative, expressed
LOC_Os01g62980.1	428.839	503.367	1.18277	2.35242	263.694	3.32e-10	LTPL101 - Protease inhibitor/seed storage/LTP family protein precursor, expressed
LOC_Os01g62990.1	337.699	375.564	36.6658	16.4669	13.4242	0.000269873	ATROPGEF7/ROPGEF7, putative, expressed
LOC_Os01g63190.1	1239.51	1130.05	354.831	157.612	4.62405	0.0339581	laccase precursor protein, putative, expressed
LOC_Os01g63210.1	354.967	299.33	1551.79	1587.88	0.208396	0.0297685	SOUL heme-binding protein, putative, expressed
LOC_Os01g63230.1	322.349	311.662	29.5692	25.8766	11.4348	0.000729152	growth regulator related protein, putative, expressed
LOC_Os01g63480.1	231.208	190.584	924.925	990.368	0.220224	0.0421418	transferase family protein, putative, expressed
LOC_Os01g63540.1	245.599	214.127	0	0	4365	4.55e-10	cytochrome P450, putative, expressed
LOC_Os01g63690.1	1167.55	612.113	9874.94	13631.1	0.0757111	0.000115471	hs1, putative, expressed
LOC_Os01g64020.1	111.287	126.683	18.9243	9.40967	8.39874	0.00962363	transcription factor, putative, expressed
LOC_Os01g64410.1	57.5623	81.8392	0	0	4365	1.26e-05	ATOFP18/OFP18, putative, expressed
LOC_Os01g64480.1	1.91874	2.24217	26.0209	23.5242	0.0839823	0.0471599	harpin-induced protein 1 domain containing protein, expressed
LOC_Os01g64540.1	305.08	307.177	9.46215	15.2907	24.7348	3.15e-05	anthocyanidin 3-O-glucosyltransferase, putative, expressed
LOC_Os01g64570.1	34.5374	31.3904	222.361	306.991	0.124544	0.00658613	U-box domain-containing protein, putative, expressed
LOC_Os01g64590.1	42.2123	43.7223	1.18277	10.5859	7.302	0.0473599	dof zinc finger domain containing protein, putative, expressed
LOC_Os01g64660.1	730.082	977.586	3.54831	1.17621	361.448	1.45e-12	fructose-1,6-bisphosphatase, putative, expressed
LOC_Os01g64660.2	124.718	126.683	0	0	4365	9.97e-09	fructose-1,6-bisphosphatase, putative, expressed
LOC_Os01g64670.1	116.084	137.893	0	2.35242	107.964	2.63e-07	soluble inorganic pyrophosphatase, putative, expressed
LOC_Os01g64860.1	1532.12	1835.22	83.9766	88.2157	19.5557	1.18e-05	OsSub11 - Putative Subtilisin homologue, expressed
LOC_Os01g65110.1	225.452	294.845	65.0523	39.9911	4.95317	0.0310954	POT family protein, expressed
LOC_Os01g65130.1	23.9843	70.6284	0	1.17621	80.4386	0.00223305	peptide transporter, putative, expressed
LOC_Os01g65140.1	28.7811	144.62	3.54831	0	48.8687	0.00022732	peptide transporter PTR2, putative, expressed
LOC_Os01g65150.1	27.8218	73.9916	2.36554	0	43.0403	0.00393517	proton-dependent oligopeptide transport, putative, expressed
LOC_Os01g65169.1	119.921	269.06	11.8277	1.17621	29.9127	4.71e-05	proton-dependent oligopeptide transport, putative, expressed
LOC_Os01g65210.1	1322.97	1683.87	30.752	29.4052	49.9831	3.44e-08	proton-dependent oligopeptide transport, putative, expressed
LOC_Os01g65380.1	6546.75	5458.56	57208.2	61469.9	0.101159	0.000581233	patellin protein, putative, expressed
LOC_Os01g65420.1	175.565	177.131	9.46215	22.348	11.0876	0.00175007	expressed protein
LOC_Os01g65440.1	1517.73	2045.98	295.692	299.933	5.98313	0.0106976	universal stress protein domain containing protein, putative, expressed
LOC_Os01g65500.1	22.0655	23.5428	0	0	4365	0.0150498	chloride channel protein, putative, expressed
LOC_Os01g65510.1	643.738	567.269	112.363	157.612	4.48563	0.0473867	OsFBX31 - F-box domain containing protein, expressed
LOC_Os01g65620.1	64.2779	42.6012	8.27938	8.23346	6.47248	0.0430752	expressed protein
LOC_Os01g65630.1	332.902	426.012	18.9243	41.1673	12.6293	0.000483559	expressed protein
LOC_Os01g65630.2	10.5531	24.6639	0	0	4365	0.0397278	expressed protein
LOC_Os01g65760.1	0	0	16.5588	23.5242	0	0.041203	retrotransposon protein, putative, unclassified, expressed
LOC_Os01g65830.1	248.477	436.102	31510.1	38491.4	0.00977948	5.8e-11	acyl-desaturase, chloroplast precursor, putative, expressed
LOC_Os01g65904.1	59.481	89.6868	468.376	355.215	0.181119	0.0192363	expressed protein
LOC_Os01g66020.1	33.578	42.6012	1.18277	3.52863	16.1691	0.00660359	protein kinase family protein, putative, expressed
LOC_Os01g66160.1	34.5374	51.5699	197.522	251.709	0.191677	0.0250205	pentatricopeptide, putative, expressed
LOC_Os01g66490.1	338.658	396.864	59.1384	68.2201	5.77521	0.015603	no apical meristem protein, putative, expressed
LOC_Os01g66610.1	351.13	394.622	3.54831	7.05725	70.3171	3.81e-08	serine/threonine-protein kinase receptor precursor, putative, expressed
LOC_Os01g66700.1	89.2215	58.2964	4.73108	14.1145	7.82772	0.0435552	beta-hexosaminidase precursor, putative, expressed
LOC_Os01g66710.1	94.0184	93.0501	0	0	4365	9.4e-07	polygalacturonase, putative, expressed
LOC_Os01g66830.1	1124.38	1281.4	117.094	132.912	9.62291	0.000909311	pectinacetylesterase domain containing protein, expressed
LOC_Os01g66850.1	277.258	265.697	3.54831	16.4669	27.1271	8.5e-06	pectinacetylesterase domain containing protein, expressed
LOC_Os01g66860.2	272.461	317.267	9.46215	5.88104	38.4358	1.63e-06	serine/threonine protein kinase, putative, expressed
LOC_Os01g66890.1	73.8716	86.3236	2.36554	1.17621	45.2305	0.000126873	BTBZ1 - Bric-a-Brac, Tramtrack, and Broad Complex BTB domain with TAZ zinc finger and Calmodulin-binding domains, expressed
LOC_Os01g67010.1	101.693	23.5428	6511.14	6987.86	0.00927744	9.16e-11	expressed protein
LOC_Os01g67030.1	164.052	47.0856	8229.71	9249.71	0.0120792	4.87e-10	auxin-responsive protein, putative, expressed
LOC_Os01g67090.1	1680.82	2086.34	318.165	391.678	5.30703	0.0193626	IQ calmodulin-binding motif domain containing protein, expressed
LOC_Os01g67110.1	549.72	936.106	156.125	102.33	5.74886	0.0149383	expressed protein
LOC_Os01g67360.1	244.64	331.841	53.2246	55.2818	5.31287	0.029676	methyltransferase, putative, expressed
LOC_Os01g67410.1	6.7156	15.6952	0	0	4365	0.0323085	AP2/EREBP transcription factor BABY BOOM, putative, expressed
LOC_Os01g67650.1	70.0341	104.261	14.1932	10.5859	7.03395	0.0250117	gibberellin response modulator protein, putative, expressed
LOC_Os01g67820.1	555.476	316.146	2313.5	2878.18	0.167888	0.0115975	exo70 exocyst complex subunit domain containing protein, expressed
LOC_Os01g68020.1	257.111	355.384	69.7834	41.1673	5.52043	0.028484	BTBZ2 - Bric-a-Brac, Tramtrack, and Broad Complex BTB domain with TAZ zinc finger and Calmodulin-binding domains, expressed
LOC_Os01g68050.1	437.473	432.739	1.18277	1.17621	368.894	1.09e-10	transmembrane amino acid transporter protein, putative, expressed
LOC_Os01g68050.2	20.1468	22.4217	0	0	4365	0.0380394	transmembrane amino acid transporter protein, putative, expressed
LOC_Os01g68260.1	39.3342	30.2693	0	0	4365	0.0035533	lysine ketoglutarate reductase trans-splicing related 1, putative, expressed
LOC_Os01g68540.1	50.8467	31.3904	0	0	4365	0.00049862	rho GDP-dissociation inhibitor 1, putative, expressed
LOC_Os01g68650.1	228.33	159.194	1116.53	1840.77	0.13104	0.00328419	plant-specific domain TIGR01615 family protein, expressed
LOC_Os01g68670.1	4.79686	4.48434	43.7625	65.8677	0.0846592	0.00777935	cysteine proteinase inhibitor precursor, putative, expressed
LOC_Os01g68680.1	685.95	466.371	2671.88	2768.8	0.211798	0.0326604	tetratricopeptide repeat domain containing protein, expressed
LOC_Os01g68720.1	11.5125	4.48434	176.233	111.74	0.0555497	0.00013116	keratin, type I cytoskeletal 9, putative, expressed
LOC_Os01g68870.1	198.59	300.451	56.7729	45.8722	4.86181	0.0426775	leucine-rich repeat receptor protein kinase EXS precursor, putative, expressed
LOC_Os01g68900.1	374.155	537	3.54831	2.35242	154.414	1.31e-09	zinc finger, C3HC4 type family protein, expressed
LOC_Os01g68940.1	287.811	343.052	47.3108	72.925	5.24689	0.0307173	ubiquitin family domain containing protein, expressed
LOC_Os01g69010.1	32.6186	31.3904	0	0	4365	0.00678297	MATE efflux protein, putative, expressed
LOC_Os01g69030.1	279.177	145.741	35.4831	32.9339	6.21072	0.0109562	sucrose-phosphate synthase, putative, expressed
LOC_Os01g69050.1	844.247	711.889	138.384	148.202	5.4299	0.0188731	lysine ketoglutarate reductase trans-splicing related 1, putative, expressed
LOC_Os01g69200.1	501.751	634.534	119.46	98.8016	5.20608	0.0265948	regulatory protein, putative, expressed
LOC_Os01g69830.1	404.855	563.906	105.266	89.3919	4.97672	0.0321401	OsSPL2 - SBP-box gene family member, expressed
LOC_Os01g70210.1	445.148	369.958	17.7415	7.05725	32.8688	3.04e-06	CRAL/TRIO domain containing protein, expressed
LOC_Os01g70220.1	391.423	605.386	30.752	41.1673	13.8601	0.000210973	histone-lysine N-methyltransferase, putative, expressed
LOC_Os01g70260.1	198.59	262.334	39.0314	56.458	4.82696	0.0442958	receptor-like protein kinase 2 precursor, putative, expressed
LOC_Os01g70280.1	0	0	43.7625	17.6431	0	0.00778011	expressed protein
LOC_Os01g70370.1	0	0	27.2037	12.9383	0	0.0122483	serine palmitoyltransferase 2, putative, expressed
LOC_Os01g70520.1	302.202	375.564	1.18277	1.17621	287.313	3.64e-10	Os1bglu5 - beta-glucosidase homologue, similar to G. max isohydroxyurate hydrolase, expressed
LOC_Os01g70560.1	821.222	1387.9	37.8486	49.4008	25.3197	2.73e-06	expressed protein
LOC_Os01g70690.1	47.9686	47.0856	288.596	349.334	0.149004	0.0115933	RALFL1 - Rapid ALkalinization Factor RALF family protein precursor, putative, expressed
LOC_Os01g70830.1	126.637	132.288	0	0	4365	2.63e-07	esterase PIR7A, putative, expressed
LOC_Os01g70840.1	337.699	372.2	3.54831	5.88104	75.2861	9.77e-08	esterase, putative, expressed
LOC_Os01g70850.1	97.8559	99.7766	8.27938	4.70484	15.221	0.00363537	esterase, putative, expressed
LOC_Os01g70890.1	38.3748	56.0543	1.18277	0	79.8373	0.000329686	histone-like transcription factor and archaeal histone, putative, expressed
LOC_Os01g70970.1	338.658	347.536	1764.69	2138.35	0.17581	0.0134506	protein kinase, putative, expressed
LOC_Os01g71090.1	282.055	335.204	2690.8	3660.36	0.0971885	0.000468495	xylanase inhibitor, putative, expressed
LOC_Os01g71094.1	94.9778	99.7766	761.703	635.153	0.139423	0.00451561	basic 7S globulin 2 precursor, putative, expressed
LOC_Os01g71340.1	114.165	96.4133	2.36554	0	89.0193	1.08e-06	glycosyl hydrolases family 17, putative, expressed
LOC_Os01g71350.1	126.637	84.0814	9.46215	2.35242	17.8355	0.000240859	glycosyl hydrolases family 17, putative, expressed
LOC_Os01g71460.1	21.1062	47.0856	0	0	4365	0.00179423	OsFBDUF11 - F-box and DUF domain containing protein, expressed
LOC_Os01g71474.1	409.652	502.246	0	0	4365	4.06e-12	glycosyl hydrolases family 17, putative, expressed
LOC_Os01g71624.1	26.8624	14.5741	94.6215	134.088	0.181175	0.039194	expressed protein
LOC_Os01g71670.1	83.4653	61.6597	0	0	4365	3.08e-05	glycosyl hydrolases family 17, putative, expressed
LOC_Os01g71710.1	111.287	118.835	7.09661	1.17621	27.8166	0.00015265	amino acid permease family protein, putative, expressed
LOC_Os01g71780.1	196.671	274.666	18.9243	11.7621	15.3598	0.000237846	WD domain, G-beta repeat domain containing protein, expressed
LOC_Os01g71820.1	1197.3	1142.39	105.266	58.8104	14.2597	9.13e-05	glycosyl hydrolases family 17, putative, expressed
LOC_Os01g71860.1	193.793	57.1753	3278.64	2054.84	0.0470553	6.4e-06	glycosyl hydrolases family 17, putative, expressed
LOC_Os01g72009.1	2091.43	1727.59	11067.2	13160.6	0.15763	0.00719602	expressed protein
LOC_Os01g72120.1	61.3998	54.9332	0	0	4365	3.57e-05	glutathione S-transferase, putative, expressed
LOC_Os01g72130.1	118.003	114.351	4.73108	0	49.1122	2.37e-05	glutathione S-transferase, putative, expressed
LOC_Os01g72150.1	13.4312	34.7536	0	0	4365	0.0320551	glutathione S-transferase, putative, expressed
LOC_Os01g72170.1	58.5216	58.2964	3.54831	0	32.9222	0.000248571	glutathione S-transferase, putative, expressed
LOC_Os01g72250.1	384.708	399.106	50.8591	27.0528	10.0603	0.00122082	uridine 5-monophosphate synthase, putative, expressed
LOC_Os01g72260.1	535.329	588.57	24.8381	14.1145	28.8529	2.62e-06	cytochrome P450, putative, expressed
LOC_Os01g72290.1	3040.25	2968.63	44.9452	14.1145	101.742	1.38e-10	expressed protein
LOC_Os01g72430.1	2733.25	2848.68	502.677	561.052	5.24751	0.0192363	NADPH quinone oxidoreductase, putative, expressed
LOC_Os01g72460.1	126.637	119.956	7.09661	11.7621	13.0758	0.00203492	NADPH quinone oxidoreductase, putative, expressed
LOC_Os01g72470.1	80.5872	145.741	0	0	4365	4.3e-07	expressed protein
LOC_Os01g72610.1	1727.83	1389.02	7382.84	7010.21	0.216553	0.0344994	glycosyltransferase, putative, expressed
LOC_Os01g72730.1	40.2936	31.3904	0	0	4365	0.00361752	cytochrome P450, putative, expressed
LOC_Os01g72740.1	2308.25	2501.14	4.73108	8.23346	370.965	1.02e-13	cytochrome P450, putative, expressed
LOC_Os01g72760.1	83.4653	84.0814	0	0	4365	3.76e-06	cytochrome P450, putative, expressed
LOC_Os01g72810.1	185.159	216.369	2589.08	3550.97	0.0653949	4.49e-05	secreted glycoprotein, putative, expressed
LOC_Os01g72834.1	921.956	802.697	5055.15	5387.04	0.165162	0.0093227	RNA recognition motif containing protein, putative, expressed
LOC_Os01g72910.1	16.3093	32.5115	0	0	4365	0.00119982	abscisic stress-ripening, putative, expressed
LOC_Os01g73170.1	2598.94	2340.83	53.2246	85.8633	35.5154	1.8e-07	peroxidase precursor, putative, expressed
LOC_Os01g73250.1	26.8624	87.4446	0	0	4365	2.9e-06	abscisic stress-ripening, putative, expressed
LOC_Os01g73500.1	1060.11	691.71	4262.7	4457.83	0.200884	0.0256179	expressed protein
LOC_Os01g73700.1	110.328	3.36326	0	0	4365	0.000224209	RCLEA2 - Root cap and Late embryogenesis related family protein precursor, putative, expressed
LOC_Os01g74040.1	1912.03	1108.75	7026.83	8623.96	0.193011	0.0214775	zinc finger, RING-type, putative, expressed
LOC_Os01g74140.1	85.384	110.987	9.46215	5.88104	12.7986	0.00248082	WRKY17, expressed
LOC_Os01g74146.1	516.142	806.06	56.7729	32.9339	14.7392	9.99e-05	WD repeat-containing protein, putative, expressed
LOC_Os01g74200.1	188.996	162.557	805.466	836.285	0.214133	0.0387003	protein kinase domain containing protein, expressed
LOC_Os01g74300.1	13662.4	12610	98.1698	62.3391	163.682	2.31e-12	metallothionein, putative, expressed
LOC_Os01g74370.1	165.012	78.476	1238.36	1426.74	0.0913616	0.00049881	domain of unknown function DUF966 domain containing protein, expressed
LOC_Os02g01140.1	743.513	927.137	63.8695	102.33	10.0521	0.000745077	GDSL-like lipase/acylhydrolase, putative, expressed
LOC_Os02g01150.1	2714.06	3250.03	561.815	471.66	5.77091	0.0118868	erythronate-4-phosphate dehydrogenase domain containing protein, expressed
LOC_Os02g01150.2	343.455	418.165	68.6006	45.8722	6.65328	0.0083639	erythronate-4-phosphate dehydrogenase domain containing protein, expressed
LOC_Os02g01200.1	84.4247	127.804	11.8277	9.40967	9.99316	0.00750334	glutaredoxin, putative, expressed
LOC_Os02g01210.1	105.531	136.772	0	0	4365	5.13e-07	amino acid transporter, putative, expressed
LOC_Os02g01355.1	15.3499	26.906	0	1.17621	35.9256	0.0402678	MADS-box transcription factor, putative, expressed
LOC_Os02g01380.1	1179.07	1552.7	188.06	170.55	7.61765	0.00308566	expressed protein
LOC_Os02g01810.1	8.63434	3.36326	113.546	184.665	0.040232	0.000170619	expressed protein
LOC_Os02g02000.1	70.9935	153.589	0	2.35242	95.4686	1.46e-05	cytochrome P450, putative, expressed
LOC_Os02g02040.1	1129.18	1220.86	171.501	131.735	7.74985	0.00283202	protein kinase, putative, expressed
LOC_Os02g02040.2	46.0498	30.2693	2.36554	4.70484	10.7942	0.0371745	protein kinase, putative, expressed
LOC_Os02g02040.4	173.646	127.804	14.1932	18.8193	9.13137	0.00515754	protein kinase, putative, expressed
LOC_Os02g02170.1	24.9437	26.906	0	0	4365	0.000419269	transporter, major facilitator family, putative, expressed
LOC_Os02g02310.1	37.4155	49.3277	0	0	4365	0.00109952	auxin-induced protein 5NG4, putative, expressed
LOC_Os02g02340.1	532.451	566.148	54.4074	50.577	10.4644	0.000653837	glycerol-3-phosphate acyltransferase, putative, expressed
LOC_Os02g02370.1	48.9279	13.453	1098.79	1156.21	0.0276633	4.92e-07	myb-like DNA-binding domain containing protein, putative, expressed
LOC_Os02g02380.1	107.45	75.1127	751.058	732.778	0.123034	0.00279904	suppressor of phythchrome A, putative, expressed
LOC_Os02g02400.1	61440.1	77416.5	10.6449	21.1718	4364.27	1.14e-21	catalase isozyme A, putative, expressed
LOC_Os02g02400.2	57.5623	30.2693	0	0	4365	0.00151326	catalase isozyme A, putative, expressed
LOC_Os02g02400.3	43.1717	51.5699	0	0	4365	0.0010662	catalase isozyme A, putative, expressed
LOC_Os02g02524.1	1107.11	992.16	152.577	176.431	6.38061	0.00805261	canopy homolog 2 precursor, putative, expressed
LOC_Os02g02730.1	142.946	171.526	778.262	956.258	0.181302	0.0171779	expressed protein
LOC_Os02g02780.1	274.38	144.62	2352.53	2246.56	0.0911051	0.000410336	protein kinase family protein, putative, expressed
LOC_Os02g02820.1	19.1874	11.2109	0	0	4365	0.0332987	helix-loop-helix DNA-binding domain containing protein, expressed
LOC_Os02g02890.1	28709.2	38790.7	6954.68	7308.96	4.7323	0.0302376	peptidyl-prolyl cis-trans isomerase, putative, expressed
LOC_Os02g03120.1	152.54	192.827	2.36554	4.70484	48.847	5.93e-06	endoglucanase, putative, expressed
LOC_Os02g03200.1	592.891	766.822	0	3.52863	385.338	1.03e-11	FAD-binding and arabino-lactone oxidase domains containing protein, putative, expressed
LOC_Os02g03570.1	207.224	273.545	17.7415	30.5814	9.94908	0.00188394	hsp20/alpha crystallin family protein, putative, expressed
LOC_Os02g03620.1	1645.32	1891.27	324.079	337.572	5.34511	0.0182961	seven in absentia protein family domain containing protein, expressed
LOC_Os02g03870.1	1930.25	802.697	13003.4	14801.4	0.0982907	0.000583219	periplasmic beta-glucosidase precursor, putative, expressed
LOC_Os02g04070.1	55.6435	50.4488	520.418	461.074	0.108093	0.00174459	retrotransposon protein, putative, unclassified, expressed
LOC_Os02g04430.1	88.2622	58.2964	0	8.23346	17.8004	0.00240476	STRUBBELIG-RECEPTOR FAMILY 1 precursor, putative, expressed
LOC_Os02g04510.1	78.6684	43.7223	710.844	619.862	0.0919743	0.000488971	UOS1, putative, expressed
LOC_Os02g04540.1	2068.4	2430.51	8482.82	10449.4	0.237632	0.0486962	retrotransposon protein, putative, unclassified, expressed
LOC_Os02g04640.1	54.6842	42.6012	2.36554	4.70484	13.7596	0.0103472	Myb-like DNA-binding domain containing protein, putative, expressed
LOC_Os02g04690.1	939.224	969.739	22.4726	27.0528	38.5451	2.93e-07	cycloartenol synthase, putative, expressed
LOC_Os02g04690.2	56.6029	63.9019	0	1.17621	102.452	0.000586346	cycloartenol synthase, putative, expressed
LOC_Os02g04755.1	9.59371	10.0898	123.008	157.612	0.0701428	0.00171817	transposon protein, putative, unclassified, expressed
LOC_Os02g05692.1	624.551	540.363	106.449	62.3391	6.90163	0.00619802	zinc finger, C3HC4 type domain containing protein, expressed
LOC_Os02g05744.1	1539.79	1701.81	293.327	282.29	5.63152	0.0141932	endoglucanase, putative, expressed
LOC_Os02g05900.1	359.764	278.029	54.4074	67.0439	5.25143	0.0272753	ternary complex factor MIP1, putative, expressed
LOC_Os02g05930.1	441.311	452.918	100.535	55.2818	5.73896	0.0183234	phytosulfokine receptor precursor, putative, expressed
LOC_Os02g05960.1	38.3748	24.6639	4.73108	1.17621	10.6714	0.0387729	phytosulfokine receptor precursor, putative, expressed
LOC_Os02g06340.1	843.287	908.079	115.911	135.264	6.97268	0.00518433	EH domain-containing protein 1, putative, expressed
LOC_Os02g06460.1	32.6186	31.3904	1.18277	0	54.1179	0.0147972	expressed protein
LOC_Os02g06670.1	89.2215	85.2025	351.282	502.241	0.204358	0.0381854	retrotransposon protein, putative, unclassified, expressed
LOC_Os02g06690.1	57.5623	62.7808	435.259	530.47	0.124614	0.00370134	plastocyanin-like domain containing protein, putative, expressed
LOC_Os02g06830.1	317.552	255.607	42.5797	39.9911	6.94143	0.00888393	expressed protein
LOC_Os02g06960.1	183.24	346.415	11.8277	18.8193	17.2824	9.13e-05	expressed protein
LOC_Os02g07030.1	95.9371	139.015	2.36554	3.52863	39.8617	1.86e-05	DUF640 domain containing protein, putative, expressed
LOC_Os02g07180.1	261.908	286.998	29.5692	63.5153	5.89686	0.0190488	expressed protein
LOC_Os02g07490.1	3072.87	3492.18	269.671	311.695	11.2924	0.00029101	glyceraldehyde-3-phosphate dehydrogenase, putative, expressed
LOC_Os02g07650.1	28.7811	66.144	1.18277	0	80.2567	7.92e-05	zinc-binding protein, putative, expressed
LOC_Os02g07680.2	8.63434	15.6952	109.998	121.15	0.105256	0.0043741	cytochrome P450, putative, expressed
LOC_Os02g07680.3	1.91874	2.24217	46.128	38.8149	0.0489848	0.00474122	cytochrome P450, putative, expressed
LOC_Os02g07680.5	0	0	36.6658	30.5814	0	0.000335757	cytochrome P450, putative, expressed
LOC_Os02g08070.1	36.4561	87.4446	0	0	4365	4.26e-05	OsSPL5 - SBP-box gene family member, expressed
LOC_Os02g08110.1	211.062	244.397	8.27938	15.2907	19.3236	0.000193525	membrane associated DUF588 domain containing protein, putative, expressed
LOC_Os02g08190.1	962.249	1213.01	196.34	231.713	5.08176	0.0244853	CYPRO4, putative, expressed
LOC_Os02g08220.1	507.507	510.094	3124.88	3383.95	0.156342	0.00709007	expressed protein
LOC_Os02g08270.1	725.285	1020.19	9.46215	5.88104	113.762	7.49e-10	class I glutamine amidotransferase, putative, expressed
LOC_Os02g08310.1	184.199	334.083	21.2898	38.8149	8.62299	0.0041453	tubby, putative, expressed
LOC_Os02g09050.1	90.1809	51.5699	581.922	465.779	0.135297	0.00531725	expressed protein
LOC_Os02g09620.1	246.558	278.029	53.2246	49.4008	5.11167	0.0383903	GDSL-like lipase/acylhydrolase, putative, expressed
LOC_Os02g09630.1	786.684	615.476	2764.13	3519.22	0.223155	0.0406607	GA20292-PA, putative, expressed
LOC_Os02g09980.1	24.9437	13.453	74.5144	199.956	0.139894	0.0220819	expressed protein
LOC_Os02g09990.1	277.258	149.104	779.445	1447.91	0.191421	0.0243231	expressed protein
LOC_Os02g10020.1	405.814	501.125	24.8381	11.7621	24.7796	7.26e-06	Mad3/BUB1 homology region 1 domain containing protein, expressed
LOC_Os02g10120.1	127.596	261.213	0	0	4365	1.67e-08	lipoxygenase, putative, expressed
LOC_Os02g10350.1	121.84	115.472	0	2.35242	100.88	1.16e-06	MLO domain containing protein, putative, expressed
LOC_Os02g10470.1	333.861	341.931	42.5797	63.5153	6.36969	0.0122322	EF hand family protein, putative, expressed
LOC_Os02g10490.1	736.797	755.611	87.5249	61.1629	10.0372	0.000748797	expressed protein
LOC_Os02g10520.1	231.208	262.334	2392.74	2607.66	0.0987006	0.000574249	OsSub12 - Putative Subtilisin homologue, expressed
LOC_Os02g10760.1	910.443	1000.01	17.7415	17.6431	53.9909	2.67e-08	AP2 domain containing protein, expressed
LOC_Os02g10800.1	0	0	60.3212	42.3435	0	0.000416564	mitochondrial carrier protein, putative, expressed
LOC_Os02g11700.1	596.729	599.781	81.6111	68.2201	7.98572	0.00327369	cytokinin-O-glucosyltransferase 3, putative, expressed
LOC_Os02g11705.1	23.9843	17.9374	0	0	4365	0.00382688	expressed protein
LOC_Os02g11720.1	584.257	669.288	149.029	104.683	4.94083	0.0324699	lipase, putative, expressed
LOC_Os02g11760.1	991.03	853.146	3162.72	5450.55	0.214109	0.032763	pleiotropic drug resistance protein, putative, expressed
LOC_Os02g11770.1	1537.87	1389.02	23.6554	17.6431	70.8717	2.39e-09	expressed protein
LOC_Os02g11790.1	3.83748	53.8121	80.4283	205.837	0.201385	0.0408475	OsFBK4 - F-box domain and kelch repeat containing protein, expressed
LOC_Os02g12350.1	26.8624	19.0584	221.178	181.136	0.114142	0.002787	histone deacetylase, putative, expressed
LOC_Os02g12380.1	24.9437	21.3006	180.964	174.079	0.13025	0.00541872	histone deacetylase, putative, expressed
LOC_Os02g12670.1	92.0996	115.472	2.36554	5.88104	25.1706	0.000437611	protein kinase family protein, putative, expressed
LOC_Os02g12680.1	11.5125	8.96868	0	0	4365	0.0409364	cytochrome P450, putative, expressed
LOC_Os02g12690.1	2063.61	2589.71	302.789	289.347	7.85852	0.00255185	cytochrome P450, putative, expressed
LOC_Os02g12790.1	345.374	589.691	8.27938	9.40967	52.8612	1.59e-07	GATA zinc finger domain containing protein, expressed
LOC_Os02g13260.1	41.253	52.691	341.82	359.92	0.133873	0.00692687	F-box family protein, putative, expressed
LOC_Os02g13800.1	240.802	174.889	1428.78	2185.4	0.115017	0.00152569	HSF-type DNA-binding domain containing protein, expressed
LOC_Os02g13870.1	11463.5	12251.2	2519.3	1873.7	5.3983	0.0157213	aquaporin protein, putative, expressed
LOC_Os02g14180.1	6.7156	13.453	247.199	418.73	0.0302864	4.7e-06	peroxidase precursor, putative, expressed
LOC_Os02g14430.1	19.1874	11.2109	229.457	270.528	0.0607983	0.000294102	peroxidase precursor, putative, expressed
LOC_Os02g14480.1	170.768	137.893	809.014	715.135	0.202514	0.02872	receptor-like kinase, putative, expressed
LOC_Os02g14490.1	238.883	286.998	15.376	4.70484	26.1882	1.41e-05	MYB family transcription factor, putative, expressed
LOC_Os02g14840.1	441.311	337.447	11.8277	12.9383	31.4446	4.32e-06	potassium channel KAT1, putative, expressed
LOC_Os02g14910.1	444.189	424.891	4360.87	5402.33	0.0890159	0.000286202	bZIP transcription factor family protein, putative, expressed
LOC_Os02g15000.1	1.91874	4.48434	31.9348	49.4008	0.0787243	0.0316312	zinc finger, C3HC4 type domain containing protein, expressed
LOC_Os02g15120.1	11.5125	13.453	85.1594	152.907	0.104868	0.00454405	RING-H2 finger protein, putative, expressed
LOC_Os02g15280.1	12.4718	10.0898	105.266	150.555	0.0881928	0.00386048	VQ domain containing protein, putative, expressed
LOC_Os02g15290.1	45.0904	28.0271	542.891	724.545	0.0576894	6.03e-05	VQ domain containing protein, putative, expressed
LOC_Os02g15520.1	51.806	30.2693	3.54831	3.52863	11.5976	0.0330501	transposon protein, putative, unclassified, expressed
LOC_Os02g15690.1	1160.84	1337.45	157.308	124.678	8.85962	0.0013682	polygalacturonase, putative, expressed
LOC_Os02g15760.1	20.1468	40.3591	2.36554	0	25.5781	0.0148052	helix-loop-helix DNA-binding domain containing protein, expressed
LOC_Os02g15810.1	5286.14	8183.92	249.564	211.718	29.2014	5.59e-07	HMG1/2, putative, expressed
LOC_Os02g15860.1	82.5059	66.144	1.18277	0	125.68	8.77e-05	expressed protein
LOC_Os02g15870.1	198.59	164.8	28.3865	10.5859	9.32429	0.00401302	molybdenum cofactor biosynthesis protein 1, putative, expressed
LOC_Os02g16030.1	984.315	1013.46	87.5249	103.506	10.4578	0.000552741	harpin-induced protein 1 domain containing protein, expressed
LOC_Os02g16560.1	6.7156	7.8476	81.6111	121.15	0.0718246	0.00273129	early light-induced protein, chloroplast precursor, putative, expressed
LOC_Os02g17000.1	95.9371	102.019	9.46215	10.5859	9.87408	0.00524628	OsSub14 - Putative Subtilisin homologue, expressed
LOC_Os02g17534.1	637.023	420.407	6915.65	7114.89	0.0753663	0.000109681	xyloglucan fucosyltransferase, putative, expressed
LOC_Os02g17620.1	177.484	244.397	0	0	4365	3.14e-09	isochorismatase family protein, putative, expressed
LOC_Os02g17780.1	262.868	273.545	11.8277	4.70484	32.4459	7.31e-06	ent-kaurene synthase, chloroplast precursor, putative, expressed
LOC_Os02g18410.1	3351.08	3156.98	38041.4	46270.9	0.0771899	0.00011056	salt stress root protein RS1, putative, expressed
LOC_Os02g18650.1	28.7811	70.6284	26309.5	41028.5	0.00147628	8.9e-17	pectinesterase, putative, expressed
LOC_Os02g18670.1	0.959371	0	30.752	27.0528	0.0165967	0.0179889	ABC transporter family protein, putative, expressed
LOC_Os02g19450.1	20.1468	29.1482	0	1.17621	41.9101	0.0293523	ATPase, AAA family protein, expressed
LOC_Os02g19530.1	42.2123	57.1753	0	0	4365	3.09e-05	lectin-like receptor kinase, putative, expressed
LOC_Os02g19640.1	335.78	475.34	2.36554	0	342.89	1.64e-10	IQ calmodulin-binding motif family protein, putative, expressed
LOC_Os02g19820.1	8146.98	8266.88	449.452	497.536	17.3327	1.66e-05	nodulin MtN3 family protein, putative, expressed
LOC_Os02g19970.1	1464	1478.71	157.308	205.837	8.10341	0.00229994	aminotransferase, classes I and II, domain containing protein, expressed
LOC_Os02g19990.1	314.674	426.012	52.0418	36.4625	8.36893	0.00330092	reticulon domain containing protein, putative, expressed
LOC_Os02g19990.2	45.0904	66.144	2.36554	7.05725	11.8048	0.0159386	reticulon domain containing protein, putative, expressed
LOC_Os02g20540.1	2175.85	2815.04	0	1.17621	4243.21	3.46e-17	fasciclin domain containing protein, expressed
LOC_Os02g20560.1	3420.16	3831.87	1.18277	2.35242	2051.38	2.95e-17	fasciclin domain containing protein, expressed
LOC_Os02g21090.1	237.924	291.482	57.9557	50.577	4.87785	0.0409602	CPuORF33 - conserved peptide uORF-containing transcript, expressed
LOC_Os02g21300.1	102.653	19.0584	778.262	1033.89	0.067164	0.0001287	transposon protein, putative, unclassified, expressed
LOC_Os02g21340.1	45.0904	42.6012	0	0	4365	0.0011664	ABC-2 type transporter family protein, expressed
LOC_Os02g22160.1	959.371	760.096	3994.21	4353.15	0.205989	0.028097	DNA binding protein, putative, expressed
LOC_Os02g22680.1	15.3499	0	109.998	169.374	0.0549445	0.00122982	integral membrane protein DUF6 containing protein, expressed
LOC_Os02g25280.1	47.0092	58.2964	13.0105	1.17621	7.42286	0.0362582	retrotransposon protein, putative, Ty1-copia subclass, expressed
LOC_Os02g25680.1	1.91874	2.24217	30.752	32.9339	0.065335	0.0244979	expressed protein
LOC_Os02g25900.1	1470.72	1178.26	7458.54	7021.97	0.182934	0.0157651	pollen signalling protein with adenylyl cyclase activity, putative, expressed
LOC_Os02g26140.1	103.612	201.795	14.1932	2.35242	18.4585	0.000232482	microtubule-binding protein TANGLED1, putative, expressed
LOC_Os02g26210.1	96.8965	144.62	4.73108	2.35242	34.0957	1.66e-05	flowering promoting factor-like 1, putative, expressed
LOC_Os02g26580.1	4.79686	0	36.6658	39.9911	0.0625756	0.031174	expressed protein
LOC_Os02g26650.3	2532.74	2599.8	134.836	182.312	16.1834	3.02e-05	delta14-sterol reductase, putative, expressed
LOC_Os02g26670.1	46.0498	43.7223	2.36554	2.35242	19.0278	0.00868731	F-box/Kelch-repeat protein, putative, expressed
LOC_Os02g26770.1	174.606	190.584	9148.72	9421.43	0.0196654	1.09e-08	cytochrome P450, putative, expressed
LOC_Os02g26810.1	40.2936	36.9958	2978.21	3018.15	0.0128894	9.98e-10	cytochrome P450, putative, expressed
LOC_Os02g26840.1	196.671	174.889	5.91384	1.17621	52.4059	3.34e-06	O-acyltransferase, putative, expressed
LOC_Os02g27360.1	795.319	591.933	2907.25	3141.65	0.229339	0.0458613	aspartic proteinase-like protein 2 precursor, putative, expressed
LOC_Os02g27500.1	114.165	58.2964	689.554	746.893	0.120061	0.00276238	Leucine Rich Repeat family protein, expressed
LOC_Os02g27510.1	0	1.12109	26.0209	23.5242	0.0226276	0.0487247	transposon protein, putative, unclassified, expressed
LOC_Os02g27680.1	11.5125	13.453	99.3526	108.211	0.120279	0.0155905	NB-ARC domain containing protein
LOC_Os02g27690.1	2.87811	2.24217	81.6111	74.1012	0.032883	0.00101535	Leucine Rich Repeat family protein, expressed
LOC_Os02g28334.1	0	3.36326	42.5797	29.4052	0.0467217	0.0298167	expressed protein
LOC_Os02g28340.1	393.342	512.336	83.9766	98.8016	4.95507	0.0318708	transferase family protein, putative, expressed
LOC_Os02g28850.1	589.054	715.252	87.5249	69.3963	8.31185	0.00243335	Kinesin motor domain domain containing protein, expressed
LOC_Os02g29140.1	47.0092	40.3591	224.726	255.237	0.182031	0.0256292	ankyrin, putative, expressed
LOC_Os02g29960.1	445.148	463.008	18.9243	25.8766	20.2709	2.25e-05	cytochrome P450, putative, expressed
LOC_Os02g30080.1	422.123	433.86	0	0	4365	1.07e-11	cytochrome P450, putative, expressed
LOC_Os02g30110.1	41.253	63.9019	0	0	4365	1.52e-05	cytochrome P450, putative, expressed
LOC_Os02g30240.1	168.849	204.038	18.9243	38.8149	6.45812	0.015075	expressed protein
LOC_Os02g30380.1	69.0747	79.597	351.282	501.065	0.174426	0.0180249	expressed protein
LOC_Os02g30780.1	243.68	299.33	3531.75	4629.56	0.0665347	4.59e-05	LGC1, putative, expressed
LOC_Os02g30850.1	62.3591	118.835	3.54831	9.40967	13.9832	0.00185129	OsGrx_C8 - glutaredoxin subgroup III, expressed
LOC_Os02g30910.1	159.256	177.131	0	0	4365	5.55e-08	nodulin MtN3 family protein, putative, expressed
LOC_Os02g31140.1	55.6435	76.2338	247.199	386.973	0.207952	0.0414487	major ampullate spidroin 2-2, putative, expressed
LOC_Os02g31840.1	7.67497	15.6952	0	0	4365	0.0423257	expressed protein
LOC_Os02g31845.1	41.253	31.3904	0	0	4365	0.00142544	expressed protein
LOC_Os02g32250.1	529.573	639.019	3686.69	3713.29	0.157918	0.00702228	retrotransposon protein, putative, unclassified, expressed
LOC_Os02g32420.1	51.806	95.2922	8.27938	14.1145	6.56868	0.0313489	protein binding protein, putative, expressed
LOC_Os02g32504.1	672.519	650.229	18.9243	37.6387	23.3854	7.5e-06	heparan-alpha-glucosaminide N-acetyltransferase, putative, expressed
LOC_Os02g32580.1	239.843	200.674	11.8277	11.7621	18.6741	8.69e-05	expressed protein
LOC_Os02g32814.1	1530.2	1040.37	6359.75	7354.83	0.187433	0.018365	heavy metal-associated domain containing protein, expressed
LOC_Os02g33110.1	5594.09	6769.11	992.343	1017.42	6.15157	0.00847005	glycosyl hydrolases, putative, expressed
LOC_Os02g33380.1	47.9686	44.8434	0	0	4365	0.00104082	pectinesterase inhibitor domain containing protein, putative, expressed
LOC_Os02g33420.1	120.881	182.737	16.5588	27.0528	6.96186	0.0125286	ATPase, AAA family protein, expressed
LOC_Os02g33550.1	2051.14	2225.35	279.133	229.361	8.41011	0.00165638	harpin-induced protein 1 domain containing protein, expressed
LOC_Os02g33670.1	27.8218	60.5386	3.54831	2.35242	14.9745	0.0114065	expressed protein
LOC_Os02g33680.1	402.936	250.002	1522.22	2001.91	0.185276	0.0191733	U-box domain containing protein, expressed
LOC_Os02g33890.1	25.903	49.3277	2.36554	3.52863	12.7636	0.0277926	expressed protein
LOC_Os02g34440.1	15.3499	23.5428	3.54831	0	10.9609	0.0371383	retrotransposon protein, putative, Ty3-gypsy subclass, expressed
LOC_Os02g34810.1	1409.32	1430.5	308.703	219.951	5.3718	0.0169952	OsAPx8 - Thylakoid-bound Ascorbate Peroxidase encoding gene 5,8, expressed
LOC_Os02g34860.1	2467.5	2976.48	418.7	402.263	6.63121	0.00605059	Regulator of chromosome condensation domain containing protein, expressed
LOC_Os02g35230.1	341.536	350.9	0	4.70484	147.175	2.99e-09	expressed protein
LOC_Os02g35500.1	2440.64	2750.02	463.645	573.99	5.0024	0.0243421	NAD binding domain of 6-phosphogluconate dehydrogenase containing protein, expressed
LOC_Os02g35650.1	11.5125	35.8747	0	0	4365	0.0192363	late embryogenesis abundant protein, putative, expressed
LOC_Os02g35660.1	61.3998	70.6284	0	4.70484	28.0622	0.000733373	PTF1, putative, expressed
LOC_Os02g35730.1	75.7903	96.4133	8.27938	9.40967	9.73504	0.0127775	expressed protein
LOC_Os02g35830.1	632.226	573.996	2573.71	3274.57	0.206253	0.0276494	extracellular ligand-gated ion channel, putative, expressed
LOC_Os02g36070.1	16.3093	47.0856	0	0	4365	0.00906678	cytochrome P450, putative, expressed
LOC_Os02g36110.1	38.3748	38.1169	2.36554	2.35242	16.2129	0.0182646	cytochrome P450, putative, expressed
LOC_Os02g36140.2	319.471	397.985	26.0209	15.2907	17.3669	7.19e-05	terpene synthase, putative, expressed
LOC_Os02g36150.1	156.378	128.925	7.09661	5.88104	21.9841	0.000278693	cytochrome P450, putative, expressed
LOC_Os02g36210.1	28.7811	21.3006	0	0	4365	0.0123274	ent-kaurene synthase, chloroplast precursor, putative, expressed
LOC_Os02g36220.1	85.384	90.8079	0	0	4365	9.65e-06	terpene synthase, putative, expressed
LOC_Os02g36300.1	20.1468	34.7536	410.421	479.893	0.0616641	8.67e-05	zinc finger, C3HC4 type domain containing protein, expressed
LOC_Os02g36350.1	23.9843	19.0584	101.718	136.44	0.180732	0.0496698	expressed protein
LOC_Os02g36414.1	395.261	274.666	2539.4	2134.82	0.143324	0.00502653	transporter family protein, putative, expressed
LOC_Os02g36450.1	568.907	706.284	99.3526	58.8104	8.06251	0.00293414	transporter family protein, putative, expressed
LOC_Os02g36500.1	581.379	679.378	119.46	157.612	4.55029	0.0442333	expressed protein
LOC_Os02g36550.1	2529.86	2119.97	59.1384	31.7576	51.1555	1.7e-08	phosphopantothenate--cysteine ligase, putative, expressed
LOC_Os02g36590.1	1994.53	2344.19	1.18277	2.35242	1227.3	1.08e-15	CPuORF19 - conserved peptide uORF-containing transcript, expressed
LOC_Os02g36590.2	52.7654	39.238	0	0	4365	0.000709641	CPuORF19 - conserved peptide uORF-containing transcript, expressed
LOC_Os02g36590.3	214.899	146.862	0	0	4365	1.45e-08	CPuORF19 - conserved peptide uORF-containing transcript, expressed
LOC_Os02g36700.1	114.165	91.929	2.36554	10.5859	15.9129	0.00224599	sucrose transporter BoSUT1, putative, expressed
LOC_Os02g36830.1	841.369	922.653	63.8695	63.5153	13.848	0.000158332	cytokinin-O-glucosyltransferase 2, putative, expressed
LOC_Os02g36840.1	165.012	125.562	16.5588	23.5242	7.2493	0.0182011	cytokinin-O-glucosyltransferase 2, putative, expressed
LOC_Os02g36890.1	470.092	655.835	44.9452	25.8766	15.898	6.76e-05	MYB family transcription factor, putative, expressed
LOC_Os02g36940.1	665.804	508.973	2661.23	2714.69	0.218526	0.037335	uncharacterized Cys-rich domain containing protein, putative, expressed
LOC_Os02g37000.1	74.831	75.1127	5.91384	1.17621	21.1485	0.00350682	mitochondrial prohibitin complex protein 1, putative, expressed
LOC_Os02g37300.1	1018.85	561.664	3795.51	4029.69	0.201978	0.0272198	heavy metal associated domain containing protein, expressed
LOC_Os02g37320.1	134.312	90.8079	619.771	462.25	0.208055	0.0383438	heavy metal associated domain containing protein, expressed
LOC_Os02g37490.1	3435.51	2653.61	80071.1	109599	0.0321037	3.22e-07	glycine-rich cell wall structural protein precursor, putative, expressed
LOC_Os02g37590.1	4582.92	3834.11	27961.8	30012.1	0.145186	0.00457677	glycerophosphoryl diester phosphodiesterase family protein, putative, expressed
LOC_Os02g37654.1	236.965	301.572	0	0	4365	6.36e-10	lecithin:cholesterol acyltransferase, putative, expressed
LOC_Os02g37690.1	2623.88	3269.08	4.73108	24.7004	200.227	2.31e-12	UDP-glucoronosyl and UDP-glucosyl transferase, putative, expressed
LOC_Os02g37700.1	729.122	793.728	0	0	4365	6.23e-14	lecithin:cholesterol acyltransferase, putative, expressed
LOC_Os02g37760.1	20.1468	20.1795	0	0	4365	0.00315014	lecithine cholesterol acyltransferase, putative, expressed
LOC_Os02g37770.1	116.084	90.8079	0	0	4365	5.58e-08	lecithin cholesterol acyltransferase, putative, expressed
LOC_Os02g37780.1	39.3342	54.9332	0	0	4365	1.72e-05	lecithine cholesterol acyltransferase, putative, expressed
LOC_Os02g37790.1	10.5531	14.5741	0	0	4365	0.0333085	retrotransposon protein, putative, unclassified, expressed
LOC_Os02g37800.1	5811.87	6174.94	41.3969	28.229	172.16	2.38e-12	lecithin:cholesterol acyltransferase, putative, expressed
LOC_Os02g37850.1	139.109	204.038	30.752	25.8766	6.0596	0.0226106	expressed protein
LOC_Os02g38120.1	873.987	827.361	3879.48	4881.27	0.194201	0.0207072	BTBN3 - Bric-a-Brac, Tramtrack, Broad Complex BTB domain with non-phototropic hypocotyl 3 NPH3 domain, expressed
LOC_Os02g38290.1	404.855	543.726	28.3865	5.88104	27.6817	4.53e-06	cytochrome P450, putative, expressed
LOC_Os02g38290.2	47.0092	59.4175	4.73108	1.17621	18.0162	0.00690733	cytochrome P450, putative, expressed
LOC_Os02g38920.1	6250.3	5191.75	62097.7	56729.7	0.0962913	0.000434225	glyceraldehyde-3-phosphate dehydrogenase, putative, expressed
LOC_Os02g39280.1	17.2687	16.8163	0	0	4365	0.0496698	C2 domain containing protein, putative, expressed
LOC_Os02g39330.1	887.418	505.609	3305.84	3619.2	0.201158	0.0270833	CHIT1 - Chitinase family protein precursor, expressed
LOC_Os02g39380.1	11.5125	21.3006	0	0	4365	0.0320916	OsCML17 - Calmodulin-related calcium sensor protein, expressed
LOC_Os02g39390.1	374.155	483.188	18.9243	32.9339	16.5325	7.21e-05	expressed protein
LOC_Os02g39620.1	187.077	44.8434	6611.68	6493.85	0.0176964	7.8e-09	ATOZI1, putative, expressed
LOC_Os02g40070.1	27.8218	5.60543	2.36554	0	14.1309	0.039103	AP2-like ethylene-responsive transcription factor PLETHORA 2, putative, expressed
LOC_Os02g40100.1	2124.05	2241.05	17.7415	7.05725	176.021	6.61e-12	plant protein of unknown function DUF869 domain containing protein, expressed
LOC_Os02g40260.1	5687.15	6386.82	975.784	1571.42	4.7401	0.0301125	uncharacterized protein At4g06744 precursor, putative, expressed
LOC_Os02g40410.1	396.22	461.887	9.46215	27.0528	23.5002	1.25e-05	expressed protein
LOC_Os02g40440.1	1316.26	1692.84	94.6215	75.2774	17.7111	1.88e-05	GDSL-like lipase/acylhydrolase, putative, expressed
LOC_Os02g40500.1	94.0184	43.7223	329.993	331.691	0.208167	0.0481057	OsGrx_C2.1 - glutaredoxin subgroup I, expressed
LOC_Os02g40690.1	280.136	366.595	23.6554	61.1629	7.62491	0.00564203	expressed protein
LOC_Os02g40730.1	143.906	68.3862	0	4.70484	45.1221	2.26e-05	ammonium transporter protein, putative, expressed
LOC_Os02g40784.1	2770.66	3562.81	721.489	675.144	4.53482	0.0371383	WAX2, putative, expressed
LOC_Os02g41460.1	236.005	414.802	9.46215	5.88104	42.4166	6.84e-07	DUF640 domain containing protein, putative, expressed
LOC_Os02g41680.1	2739.96	2200.69	360.745	593.986	5.17492	0.0197579	phenylalanine ammonia-lyase, putative, expressed
LOC_Os02g41710.1	22.0655	32.5115	0	0	4365	0.00298516	cyclic nucleotide-gated ion channel, putative, expressed
LOC_Os02g41840.1	65.2372	53.8121	277.951	421.083	0.170306	0.0207072	DUF584 domain containing protein, putative, expressed
LOC_Os02g41860.1	3215.81	2495.54	12138.8	14253.3	0.216404	0.0343088	aquaporin protein, putative, expressed
LOC_Os02g41860.2	795.319	702.92	2824.45	4114.38	0.215921	0.0346382	aquaporin protein, putative, expressed
LOC_Os02g41954.1	299.324	311.662	1759.96	2152.46	0.156166	0.00736065	gibberellin 2-beta-dioxygenase 7, putative, expressed
LOC_Os02g41954.2	47.0092	21.3006	270.854	286.995	0.122452	0.00674349	gibberellin 2-beta-dioxygenase 7, putative, expressed
LOC_Os02g42060.1	42.2123	98.6555	1.18277	0	119.1	3.47e-05	response regulator receiver domain containing protein, expressed
LOC_Os02g42430.1	67.156	104.261	580.74	610.452	0.143904	0.00635601	GEM, putative, expressed
LOC_Os02g42560.1	657.169	966.375	33.1175	31.7576	25.0257	3.59e-06	expressed protein
LOC_Os02g42620.1	8.63434	20.1795	0	0	4365	0.0268453	protein kinase, putative, expressed
LOC_Os02g42650.1	759.822	875.568	7.09661	2.35242	173.075	8.1e-11	expansin precursor, putative, expressed
LOC_Os02g42740.1	462.417	534.758	28.3865	37.6387	15.103	0.000115342	cytochrome b5-like Heme/Steroid binding domain containing protein, expressed
LOC_Os02g42780.1	88.2622	84.0814	5.91384	7.05725	13.2867	0.00397866	lectin receptor-type protein kinase, putative, expressed
LOC_Os02g42870.1	21.1062	50.4488	3.54831	0	20.166	0.00644392	MYB family transcription factor, putative, expressed
LOC_Os02g42880.1	113.206	85.2025	9.46215	8.23346	11.2123	0.00462825	remorin C-terminal domain containing protein, putative, expressed
LOC_Os02g43120.1	47.0092	57.1753	1.18277	8.23346	11.0644	0.0161445	zinc finger, C3HC4 type domain containing protein, expressed
LOC_Os02g43170.1	461.458	309.42	2655.32	3954.41	0.116628	0.00156767	B-box zinc finger family protein, putative, expressed
LOC_Os02g43170.2	82.5059	67.2651	456.549	638.681	0.136748	0.00608158	B-box zinc finger family protein, putative, expressed
LOC_Os02g43194.1	87.3028	80.7181	0	1.17621	142.85	4.64e-05	aldehyde dehydrogenase, putative, expressed
LOC_Os02g43290.1	571.785	567.269	2288.66	2655.88	0.230366	0.0456791	protein kinase domain containing protein, expressed
LOC_Os02g43330.1	57.5623	34.7536	0	0	4365	0.000982369	homeobox associated leucine zipper, putative, expressed
LOC_Os02g43360.1	175.565	188.342	7892.62	8411.07	0.0223205	2.66e-08	cytochrome b5-like Heme/Steroid binding domain containing protein, expressed
LOC_Os02g43540.1	226.412	289.24	26.0209	25.8766	9.93596	0.00153822	retrotransposon protein, putative, unclassified, expressed
LOC_Os02g43560.1	70.0341	84.0814	4.73108	2.35242	21.757	0.000700801	WRKY34, expressed
LOC_Os02g43660.1	705.138	600.902	56.7729	30.5814	14.9511	8.59e-05	plastocyanin-like domain containing protein, putative, expressed
LOC_Os02g43770.1	60.4404	81.8392	380.852	516.356	0.158581	0.0118967	DUF630/DUF632 domains containing protein, putative, expressed
LOC_Os02g44080.1	334.821	26.906	0	2.35242	153.768	2.55e-07	aquaporin protein, putative, expressed
LOC_Os02g44090.1	46.0498	48.2067	3.54831	1.17621	19.9505	0.00604113	zinc finger protein, putative, expressed
LOC_Os02g44108.1	4811.25	4613.27	21362	22289.2	0.215905	0.0326257	expansin precursor, putative, expressed
LOC_Os02g44120.1	0	0	10.6449	35.2863	0	0.0141882	ZOS2-13 - C2H2 zinc finger protein, expressed
LOC_Os02g44300.1	170.768	165.921	790.09	842.166	0.206272	0.0333229	MSP domain containing protein, expressed
LOC_Os02g44310.1	2073.2	88.5657	158.491	128.207	7.54023	0.00252098	LTPL112 - Protease inhibitor/seed storage/LTP family protein precursor, expressed
LOC_Os02g44320.1	25325.5	26906	1550.61	1146.8	19.3636	7.54e-06	LTPL113 - Protease inhibitor/seed storage/LTP family protein precursor, expressed
LOC_Os02g44630.1	44669.3	35610.1	221064	246004	0.171879	0.0111641	aquaporin protein, putative, expressed
LOC_Os02g44720.1	683.072	371.079	4485.06	5315.29	0.107563	0.00098605	expressed protein
LOC_Os02g44730.1	363.602	386.774	22.4726	31.7576	13.8369	0.000224763	tetracycline transporter protein, putative, expressed
LOC_Os02g44740.1	210.102	339.689	15.376	25.8766	13.3274	0.000298498	expressed protein
LOC_Os02g44930.1	1790.19	2501.14	357.196	308.167	6.4496	0.00709112	HMG1/2, putative, expressed
LOC_Os02g44980.1	2351.42	2266.83	451.818	414.026	5.33382	0.0177837	transmembrane amino acid transporter protein, putative, expressed
LOC_Os02g44990.1	38.3748	19.0584	185.695	201.132	0.148473	0.0171877	OsFBDUF13 - F-box and DUF domain containing protein, expressed
LOC_Os02g45010.1	128.556	104.261	21.2898	14.1145	6.57593	0.0167668	ethylene-responsive protein related, putative, expressed
LOC_Os02g45420.1	338.658	126.683	1549.43	1946.63	0.133105	0.00377699	AP2 domain containing protein, expressed
LOC_Os02g45450.1	340.577	202.916	1114.17	1598.47	0.200356	0.0281615	dehydration-responsive element-binding protein, putative, expressed
LOC_Os02g45780.1	1721.11	1091.94	7067.04	10363.6	0.161385	0.00864561	zinc finger, C3HC4 type domain containing protein, expressed
LOC_Os02g45850.1	77.7091	70.6284	351.282	470.484	0.180511	0.0221009	B3 DNA binding domain containing protein, expressed
LOC_Os02g46030.1	13.4312	11.2109	114.729	89.3919	0.120723	0.00460047	MYB family transcription factor, putative, expressed
LOC_Os02g46180.1	1.91874	4.48434	44.9452	102.33	0.0434769	0.00146227	DUF581 domain containing protein, expressed
LOC_Os02g46360.1	46.0498	66.144	642.244	863.337	0.0745186	0.0001716	invertase/pectin methylesterase inhibitor family protein, putative, expressed
LOC_Os02g46610.1	429.798	461.887	70.9661	82.3346	5.81658	0.016574	zinc-binding protein, putative, expressed
LOC_Os02g46690.1	51.806	87.4446	289.778	486.951	0.179278	0.016858	OsFBD8 - F-box and FBD domain containing protein, expressed
LOC_Os02g46780.1	28.7811	49.3277	0	1.17621	66.4073	0.00338909	MYB family transcription factor, putative, expressed
LOC_Os02g46839.1	679.235	494.399	2804.35	3064.02	0.199993	0.0252866	expressed protein
LOC_Os02g46850.1	2693.91	1859.88	11901	12536	0.186348	0.0174955	oligopeptide transporter, putative, expressed
LOC_Os02g46860.1	563.151	489.914	2774.78	3399.24	0.170564	0.0114065	oligopeptide transporter 4, putative, expressed
LOC_Os02g46910.1	2101.98	2263.47	13541.5	16726.9	0.144225	0.00423242	glycosyl hydrolases family 16, putative, expressed
LOC_Os02g47110.1	226.412	198.432	981.698	979.782	0.216593	0.036947	ADP-ribosylation factor, putative, expressed
LOC_Os02g47130.1	3896.01	5596.46	306.337	278.762	16.2237	2.89e-05	expressed protein
LOC_Os02g47180.1	2686.24	3385.68	177.415	194.074	16.3448	2.81e-05	WD repeat-containing protein, putative, expressed
LOC_Os02g47180.2	57.5623	80.7181	5.91384	5.88104	11.7238	0.00563704	WD repeat-containing protein, putative, expressed
LOC_Os02g47310.1	1352.71	1683.87	20.1071	23.5242	69.5965	3.64e-09	Cyclopropane-fatty-acyl-phospholipid synthase, putative, expressed
LOC_Os02g47400.1	154.459	171.526	13.0105	21.1718	9.53668	0.00513801	pectinacetylesterase domain containing protein, expressed
LOC_Os02g47420.1	1043.8	1049.34	111.18	122.326	8.96393	0.00130821	ATROPGEF7/ROPGEF7, putative, expressed
LOC_Os02g47470.1	3117.96	1903.6	15642.1	17919.5	0.149622	0.00578916	cytochrome P450, putative, expressed
LOC_Os02g47470.2	84.4247	68.3862	733.317	691.611	0.107241	0.00146548	cytochrome P450, putative, expressed
LOC_Os02g47470.3	1.91874	2.24217	60.3212	31.7576	0.0451886	0.0150997	cytochrome P450, putative, expressed
LOC_Os02g47510.1	561.232	701.799	11.8277	14.1145	48.6864	1.54e-07	9-cis-epoxycarotenoid dioxygenase 1, chloroplast precursor, putative, expressed
LOC_Os02g47660.1	1065.86	1047.09	4373.88	4627.21	0.234744	0.0481348	basic helix-loop-helix, putative, expressed
LOC_Os02g47744.1	201.468	190.584	1016	999.778	0.194492	0.0235384	MYB family transcription factor, putative, expressed
LOC_Os02g47780.1	379.911	360.989	4.73108	10.5859	48.3713	3.78e-07	hydrolase, alpha/beta fold family domain containing protein, expressed
LOC_Os02g48094.1	100.734	160.315	15.376	12.9383	9.21969	0.00618309	expressed protein
LOC_Os02g48150.1	75.7903	73.9916	4.73108	12.9383	8.47692	0.0148746	expressed protein
LOC_Os02g48200.1	202.427	158.073	1258.47	1162.09	0.148933	0.00668225	lectin-like protein kinase, putative, expressed
LOC_Os02g48210.1	1018.85	905.837	5656	5212.96	0.177081	0.0133889	lectin-like protein kinase, putative, expressed
LOC_Os02g48340.1	755.985	622.202	3919.7	3351.02	0.189553	0.0188348	RNA recognition motif containing protein, putative, expressed
LOC_Os02g48340.2	34.5374	28.0271	293.327	219.951	0.121892	0.00386031	RNA recognition motif containing protein, putative, expressed
LOC_Os02g48360.1	5327.39	5878.97	52.0418	119.973	65.1475	2.14e-09	pyrophosphate--fructose 6-phosphate 1-phosphotransferase subunit alpha, putative, expressed
LOC_Os02g48450.1	157.337	192.827	20.1071	44.6959	5.40351	0.0476947	xylem cysteine proteinase 2 precursor, putative, expressed
LOC_Os02g48470.1	837.531	1039.25	4849.35	4805.99	0.194377	0.0198	expressed protein
LOC_Os02g48570.1	375.114	533.637	1.18277	4.70484	154.35	2.14e-09	peptide transporter PTR2, putative, expressed
LOC_Os02g48690.1	1.91874	5.60543	34.3003	105.859	0.0536831	0.00515334	expressed protein
LOC_Os02g48900.1	17379	18824.1	514.504	492.832	35.9395	1.14e-07	aspartic proteinase nepenthesin-1 precursor, putative, expressed
LOC_Os02g48900.2	149.662	118.835	8.27938	7.05725	17.5069	0.000711452	aspartic proteinase nepenthesin-1 precursor, putative, expressed
LOC_Os02g49260.1	99.7746	90.8079	2.36554	3.52863	32.3341	0.000109731	transporter-related, putative, expressed
LOC_Os02g49420.1	34.5374	66.144	402.141	509.298	0.110464	0.00171682	fasciclin-like arabinogalactan precursor protein, putative, expressed
LOC_Os02g49720.1	1804.58	1704.05	8481.64	8740.41	0.203729	0.0249692	aldehyde dehydrogenase, putative, expressed
LOC_Os02g49720.2	137.19	123.319	497.946	671.615	0.222741	0.0411642	aldehyde dehydrogenase, putative, expressed
LOC_Os02g49840.1	28.7811	35.8747	0	2.35242	27.4849	0.0143657	OsMADS57 - MADS-box family gene with MIKCc type-box, expressed
LOC_Os02g49920.1	2699.67	2895.76	261.392	232.889	11.3203	0.000281036	3-ketoacyl-CoA synthase, putative, expressed
LOC_Os02g50000.1	197.63	155.831	0	1.17621	300.509	3.51e-08	GDSL-like lipase/acylhydrolase, putative, expressed
LOC_Os02g50040.1	922.915	1170.41	99.3526	83.5108	11.4475	0.000326845	endoglucanase, putative, expressed
LOC_Os02g50174.1	1302.83	1094.18	7033.93	7272.5	0.167547	0.0100138	caleosin related protein, putative, expressed
LOC_Os02g50200.1	76.7497	112.109	450.635	641.034	0.173	0.0142849	cysteine-rich repeat secretory protein precursor, putative, expressed
LOC_Os02g50300.1	8.63434	5.60543	127.739	183.489	0.0457535	0.000204138	expressed protein
LOC_Os02g50690.1	257.111	311.662	17.7415	18.8193	15.5569	0.000252743	GDSL-like lipase/acylhydrolase, putative, expressed
LOC_Os02g50940.1	295.486	219.733	1696.09	2315.96	0.128418	0.00275012	NHL repeat-containing protein, putative, expressed
LOC_Os02g50990.1	476.808	464.129	61.504	51.7532	8.30797	0.00310717	RING-H2 finger protein ATL1Q, putative, expressed
LOC_Os02g50990.2	127.596	162.557	22.4726	21.1718	6.64814	0.0246833	RING-H2 finger protein ATL1Q, putative, expressed
LOC_Os02g51110.1	442.27	458.524	31.9348	17.6431	18.1693	3.08e-05	aquaporin protein, putative, expressed
LOC_Os02g51550.1	63.3185	100.898	0	0	4365	4.07e-06	DUF581 domain containing protein, expressed
LOC_Os02g51590.1	604.404	626.687	27.2037	24.7004	23.7186	8.61e-06	phosphoglycerate mutase, putative, expressed
LOC_Os02g51620.1	4859.22	5793.77	410.421	442.255	12.4936	0.000150341	glycosyl hydrolase family 3 protein, putative, expressed
LOC_Os02g51680.1	110.328	84.0814	4.73108	0	41.0919	8.6e-05	uncharacterized glycosyl hydrolase Rv2006/MT2062, putative, expressed
LOC_Os02g51760.1	79.6278	45.9645	11.8277	4.70484	7.59668	0.0245095	expressed protein
LOC_Os02g51799.1	10.5531	8.96868	0	0	4365	0.0403948	MYB family transcription factor, putative, expressed
LOC_Os02g51890.1	838.49	637.897	5432.46	5966.91	0.129515	0.00260592	RNA recognition motif containing protein, putative, expressed
LOC_Os02g51890.2	105.531	65.0229	771.165	826.875	0.106727	0.00133257	RNA recognition motif containing protein, putative, expressed
LOC_Os02g51900.1	141.028	73.9916	696.651	735.131	0.150176	0.00847002	cytokinin-O-glucosyltransferase 2, putative, expressed
LOC_Os02g51930.1	928.671	1090.82	3.54831	0	569.141	5.41e-13	cytokinin-O-glucosyltransferase 2, putative, expressed
LOC_Os02g51950.1	1048.59	1294.85	154.943	155.26	7.55457	0.0033016	expressed protein
LOC_Os02g51970.1	311.796	97.5344	9669.14	10936.4	0.0198651	1.59e-08	phosphate-induced protein 1 conserved region domain containing protein, expressed
LOC_Os02g52000.1	296.446	86.3236	6457.92	6878.47	0.0287011	2.24e-07	phosphate-induced protein 1 conserved region domain containing protein, expressed
LOC_Os02g52010.1	2639.23	1849.79	9832.36	10016.6	0.226159	0.0425639	phosphate-induced protein 1 conserved region domain containing protein, expressed
LOC_Os02g52180.1	139.109	108.745	8.27938	7.05725	16.1609	0.0013638	plastocyanin-like domain containing protein, putative, expressed
LOC_Os02g52190.1	192.834	178.253	31.9348	19.9956	7.14585	0.00867376	helix-loop-helix DNA-binding protein, putative, expressed
LOC_Os02g52314.1	1979.18	1810.55	9581.61	9930.73	0.194222	0.0203584	BTB1 - Bric-a-Brac,Tramtrack, Broad Complex BTB domain, expressed
LOC_Os02g52360.1	418.286	445.071	85.1594	83.5108	5.11861	0.0290546	peptidyl-prolyl cis-trans isomerase CYP40, putative, expressed
LOC_Os02g52380.1	11.5125	2.24217	86.3421	79.9822	0.0826976	0.0075304	DUF1645 domain containing protein, putative, expressed
LOC_Os02g52450.1	394.302	347.536	78.0627	45.8722	5.98571	0.015146	regulator of ribonuclease, putative, expressed
LOC_Os02g52510.1	109.368	152.468	9.46215	3.52863	20.1555	0.000334661	SNF2 family N-terminal domain containing protein, expressed
LOC_Os02g52540.1	6.7156	3.36326	55.5901	43.5197	0.101694	0.0157213	EF hand family protein, putative, expressed
LOC_Os02g52630.1	17.2687	17.9374	0	0	4365	0.0047157	xyloglucan fucosyltransferase, putative, expressed
LOC_Os02g52670.1	394.302	311.662	1305.78	2190.1	0.201942	0.0271567	AP2 domain containing protein, expressed
LOC_Os02g52720.1	29.7405	29.1482	0	0	4365	0.00660359	peroxisomal multifunctional enzyme type 2, putative, expressed
LOC_Os02g52730.1	18.2281	35.8747	159.674	116.445	0.19594	0.0359897	ferredoxin--nitrite reductase, putative, expressed
LOC_Os02g52810.1	2218.07	2562.8	405.69	411.673	5.84914	0.0112542	remorin C-terminal domain containing protein, putative, expressed
LOC_Os02g52850.1	166.931	133.409	870.518	893.919	0.170218	0.0137965	receptor-like protein kinase like protein, putative, expressed
LOC_Os02g52930.1	46.0498	49.3277	0	0	4365	0.000124483	integral membrane protein DUF6 containing protein, expressed
LOC_Os02g53130.1	27.8218	8.96868	2.36554	0	15.5527	0.0250938	nitrate reductase, putative, expressed
LOC_Os02g53180.2	845.206	867.72	182.146	196.427	4.52469	0.041168	1-aminocyclopropane-1-carboxylate oxidase protein, putative, expressed
LOC_Os02g53210.7	0.959371	0	27.2037	14.1145	0.0232191	0.047822	expressed protein
LOC_Os02g53360.1	238.883	391.259	42.5797	64.6915	5.87429	0.0199662	expressed protein
LOC_Os02g53530.1	440.351	569.511	36.6658	23.5242	16.7779	4.83e-05	ZOS2-17 - C2H2 zinc finger protein, expressed
LOC_Os02g53620.1	109.368	106.503	2.36554	7.05725	22.9095	0.00060533	nuclear transcription factor Y subunit, putative, expressed
LOC_Os02g54100.1	88.2622	87.4446	5.91384	5.88104	14.8969	0.00182486	expressed protein
LOC_Os02g54240.1	92.0996	81.8392	5.91384	7.05725	13.4097	0.00196118	OsFBX62 - F-box domain containing protein, expressed
LOC_Os02g54530.1	13.4312	13.453	197.522	279.938	0.0563067	0.000247016	SCP-like extracellular protein, expressed
LOC_Os02g54540.1	262.868	364.353	1683.08	1981.91	0.171138	0.0111761	SCP-like extracellular protein, expressed
LOC_Os02g54880.1	0	0	40.2141	28.229	0	0.000654917	cytochrome c oxidase subunit, putative, expressed
LOC_Os02g55050.1	25.903	32.5115	1.18277	0	49.3879	0.00382876	OsFBX64 - F-box domain containing protein, expressed
LOC_Os02g55190.1	169.809	284.756	5.91384	0	76.8644	2e-07	expressed protein
LOC_Os02g55610.1	147.743	228.701	688.372	1235.02	0.195719	0.0212027	serine-rich protein, putative, expressed
LOC_Os02g55890.1	734.878	494.399	30938.9	41466.1	0.0169778	3.68e-09	inorganic H+ pyrophosphatase, putative, expressed
LOC_Os02g56120.1	71.9528	34.7536	667.082	852.752	0.0702093	0.000159764	OsIAA9 - Auxin-responsive Aux/IAA gene family member, expressed
LOC_Os02g56170.1	526.695	531.394	48.4935	69.3963	8.97524	0.00199302	inositol-1-monophosphatase, putative, expressed
LOC_Os02g56310.1	129.515	96.4133	513.322	542.232	0.214038	0.0411819	calcium-dependent protein kinase isoform AK1, putative, expressed
LOC_Os02g56380.1	1214.56	836.33	10705.2	9682.55	0.100594	0.000611217	OsWAK21 - OsWAK receptor-like cytoplasmic kinase OsWAK-RLCK, expressed
LOC_Os02g56460.1	0	4.48434	59.1384	156.436	0.0208018	3.52e-06	dehydrogenase, putative, expressed
LOC_Os02g56510.1	1254.86	1088.57	39.0314	35.2863	31.5326	5.88e-07	phosphate transporter 1, putative, expressed
LOC_Os02g56520.1	965.127	1279.16	206.985	302.286	4.40687	0.046527	expressed protein
LOC_Os02g56540.1	1298.99	1764.59	67.4178	54.1056	25.2098	2.25e-06	kinesin motor domain containing protein, putative, expressed
LOC_Os02g56600.1	431.717	454.039	1.18277	2.35242	250.554	3.4e-10	no apical meristem protein, putative, expressed
LOC_Os02g56680.1	0	11.2109	132.47	370.506	0.022289	3.14e-07	dehydrogenase, putative, expressed
LOC_Os02g56860.1	2536.58	2297.1	14763.3	15219	0.161218	0.00792502	3-ketoacyl-CoA synthase, putative, expressed
LOC_Os02g57090.1	79.6278	187.221	14.1932	21.1718	7.54557	0.00881606	anthranilate phosphoribosyltransferase, putative, expressed
LOC_Os02g57110.1	12975.5	14774.8	2159.74	1705.5	7.17945	0.00354271	GDSL-like lipase/acylhydrolase, putative, expressed
LOC_Os02g57110.2	23.0249	31.3904	2.36554	0	23.0033	0.0128972	GDSL-like lipase/acylhydrolase, putative, expressed
LOC_Os02g57700.1	91.1403	66.144	1078.69	1116.22	0.0716587	0.000114099	protein kinase, putative, expressed
LOC_Os02g57720.1	2718.86	2167.06	428.162	356.391	6.22764	0.00759755	aquaporin protein, putative, expressed
LOC_Os02g57770.1	140.068	220.854	0	0	4365	2.43e-08	glycosyl hydrolases family 16, putative, expressed
LOC_Os02g57840.1	127.596	60.5386	7.09661	19.9956	6.94426	0.0287839	remorin C-terminal domain containing protein, putative, expressed
LOC_Os02g58214.1	623.591	688.346	15.376	5.88104	61.7178	2.19e-08	expressed protein
LOC_Os02g58390.1	682.113	1044.85	123.008	76.4536	8.65813	0.00176696	inactive receptor kinase At2g26730 precursor, putative, expressed
LOC_Os02g58470.1	399.098	460.766	70.9661	71.7487	6.02505	0.0136436	expressed protein
LOC_Os02g58540.1	58.5216	108.745	335.906	428.14	0.218922	0.0434008	RING-H2 finger protein, putative, expressed
LOC_Os02g58740.1	316.593	562.785	92.256	72.925	5.32372	0.025586	expressed protein
LOC_Os02g58790.1	663.885	737.674	115.911	55.2818	8.187	0.00236777	cell division inhibitor, putative, expressed
LOC_Os03g01260.1	165.971	99.7766	764.069	799.822	0.169927	0.0155842	expansin precursor, putative, expressed
LOC_Os03g01290.1	23.9843	28.0271	0	0	4365	0.00155223	peptide transporter PTR2, putative, expressed
LOC_Os03g01300.1	1613.66	2066.16	20.1071	21.1718	89.1455	6.57e-10	LTPL114 - Protease inhibitor/seed storage/LTP family protein precursor, expressed
LOC_Os03g01320.1	10848.6	14336.4	200916	226101	0.0589789	1.73e-05	LTPL116 - Protease inhibitor/seed storage/LTP family protein precursor, expressed
LOC_Os03g01590.1	121.84	141.257	11.8277	12.9383	10.6233	0.00452203	PAIR1, putative, expressed
LOC_Os03g01720.1	188.037	209.643	43.7625	38.8149	4.81584	0.0473599	protein binding protein, putative, expressed
LOC_Os03g01800.1	2818.63	2852.04	2.36554	2.35242	1201.93	3.6e-16	glycosyl hydrolases family 16, putative, expressed
LOC_Os03g01880.1	121.84	117.714	13.0105	3.52863	14.4841	0.00110713	possible lysine decarboxylase domain containing protein, expressed
LOC_Os03g01980.1	482.564	877.81	117.094	152.907	5.0384	0.0278005	KIP1, putative, expressed
LOC_Os03g02040.1	3319.42	2913.7	46786.8	46459.1	0.0668461	4.44e-05	remorin, putative, expressed
LOC_Os03g02190.1	779.969	943.954	126.556	142.321	6.41155	0.00842239	protein kinase domain containing protein, expressed
LOC_Os03g02210.1	49.8873	81.8392	8.27938	5.88104	9.30244	0.0414083	expressed protein
LOC_Os03g02280.1	92.0996	152.468	3.54831	5.88104	25.9368	0.000137094	DUF584 domain containing protein, putative, expressed
LOC_Os03g02290.1	858.637	915.927	75.6972	84.687	11.0645	0.000422823	kinesin motor domain containing protein, putative, expressed
LOC_Os03g02300.1	27.8218	31.3904	166.77	204.66	0.159416	0.0146427	expressed protein
LOC_Os03g02330.1	172.687	160.315	768.8	832.756	0.207924	0.0328783	AAA-type ATPase family protein, putative, expressed
LOC_Os03g02400.1	399.098	521.305	2041.46	2805.26	0.189902	0.0181257	plastocyanin-like domain containing protein, putative, expressed
LOC_Os03g02530.1	2277.55	1640.15	14194.4	18156	0.121102	0.00173906	OsRhmbd7 - Putative Rhomboid homologue, expressed
LOC_Os03g02710.1	553.557	593.054	150.212	102.33	4.54028	0.0447492	hydroxymethylglutaryl-CoA synthase, putative, expressed
LOC_Os03g02740.1	62.3591	95.2922	0	3.52863	44.6778	0.000279776	phospholipase D, putative, expressed
LOC_Os03g02920.1	4033.2	4131.2	41818	45893.3	0.0930826	0.000337969	peroxidase precursor, putative, expressed
LOC_Os03g02939.1	82.5059	28.0271	352.465	451.664	0.137457	0.00838669	peroxidase precursor, putative, expressed
LOC_Os03g03000.1	68.1154	135.651	2.36554	0	86.1397	2.12e-05	helix-loop-helix DNA-binding domain containing protein, expressed
LOC_Os03g03034.1	818.344	707.405	9083.67	9137.97	0.0837328	0.000192875	flavonol synthase/flavanone 3-hydroxylase, putative, expressed
LOC_Os03g03034.2	23.9843	2.24217	130.105	149.379	0.0938391	0.00516556	flavonol synthase/flavanone 3-hydroxylase, putative, expressed
LOC_Os03g03034.4	28.7811	4.48434	178.598	164.669	0.0969084	0.00371109	flavonol synthase/flavanone 3-hydroxylase, putative, expressed
LOC_Os03g03034.5	18.2281	3.36326	182.146	168.198	0.0616288	0.000611217	flavonol synthase/flavanone 3-hydroxylase, putative, expressed
LOC_Os03g03070.1	31.6593	30.2693	1.18277	3.52863	13.1444	0.0290801	transcription factor, putative, expressed
LOC_Os03g03164.1	3211.97	2976.48	648.157	671.615	4.68903	0.0310358	homeobox protein knotted-1, putative, expressed
LOC_Os03g03260.1	194.752	255.607	8.27938	3.52863	38.1402	4.07e-06	homeobox domain containing protein, expressed
LOC_Os03g03320.1	59.481	62.7808	7.09661	2.35242	12.9391	0.0105872	expressed protein
LOC_Os03g03334.1	5.75623	0	312.251	869.218	0.00487209	1.87e-10	expressed protein
LOC_Os03g03370.1	98.8152	96.4133	464.828	552.818	0.191843	0.0250998	fatty acid hydroxylase, putative, expressed
LOC_Os03g03500.1	190.915	186.1	0	7.05725	53.4223	1.78e-06	heavy metal-associated domain containing protein, expressed
LOC_Os03g03630.1	584.257	728.705	40.2141	21.1718	21.3887	9.63e-06	expressed protein
LOC_Os03g03660.3	36.4561	33.6326	256.661	167.022	0.165427	0.0213345	CAMK_CAMK_like.17 - CAMK includes calcium/calmodulin depedent protein kinases, expressed
LOC_Os03g03724.1	3.83748	4.48434	1169.76	929.205	0.00396473	7.3e-12	expressed protein
LOC_Os03g03724.2	0	0	216.447	274.057	0	6.75e-10	expressed protein
LOC_Os03g03760.1	29.7405	47.0856	1.18277	0	64.9544	0.000549115	MYB family transcription factor, putative, expressed
LOC_Os03g03860.1	1030.36	1010.1	4391.62	4406.08	0.231931	0.0457986	expressed protein
LOC_Os03g03910.1	1493.74	1052.7	211.716	191.722	6.31185	0.00723946	catalase domain containing protein, expressed
LOC_Os03g04190.1	71.9528	58.2964	0	2.35242	55.3683	7.44e-05	cytochrome P450, putative, expressed
LOC_Os03g04530.1	1311.46	1778.04	4.73108	2.35242	436.155	1.43e-13	cytochrome P450, putative, expressed
LOC_Os03g04550.1	896.053	1336.33	117.094	92.9205	10.6297	0.000500798	expressed protein
LOC_Os03g04950.1	272.461	347.536	17.7415	23.5242	15.0245	0.000201207	OsSub26 - Putative Subtilisin homologue, expressed
LOC_Os03g05140.1	247.518	125.562	4791.4	5732.84	0.0354495	8.97e-07	receptor-like protein kinase 2 precursor, putative, expressed
LOC_Os03g05270.1	435.555	502.246	104.084	64.6915	5.55651	0.018629	RING finger and CHY zinc finger domain-containing protein 1, putative, expressed
LOC_Os03g05270.2	64.2779	76.2338	16.5588	4.70484	6.60808	0.0380569	RING finger and CHY zinc finger domain-containing protein 1, putative, expressed
LOC_Os03g05290.1	59378.4	55341.2	292336	324482	0.185986	0.0160872	aquaporin protein, putative, expressed
LOC_Os03g05390.12	259.03	281.392	1.18277	3.52863	114.705	6.48e-08	2 Citrate transporter protein, putative, expressed
LOC_Os03g05390.3	70.0341	109.866	0	1.17621	152.949	3.98e-05	Citrate transporter protein, putative, expressed
LOC_Os03g05530.1	56.6029	90.8079	3.54831	0	41.544	4.35e-05	nodulin, putative, expressed
LOC_Os03g05620.1	2510.67	2168.18	12865	13134.7	0.179958	0.0141882	inorganic phosphate transporter, putative, expressed
LOC_Os03g05750.1	1609.82	960.77	4630.54	7403.06	0.213618	0.0342368	heavy-metal-associated domain-containing protein, putative, expressed
LOC_Os03g06000.1	85.384	85.2025	7.09661	4.70484	14.4547	0.00211757	expansin precursor, putative, expressed
LOC_Os03g06139.1	620.713	658.077	124.191	97.6253	5.76509	0.014741	ABC-2 type transporter domain containing protein, expressed
LOC_Os03g06350.1	130.474	144.62	4.73108	18.8193	11.6811	0.00222248	DUF623 domain containing protein, expressed
LOC_Os03g06360.1	56.6029	75.1127	4.73108	9.40967	9.31461	0.0334579	late embryogenesis abundant protein D-34, putative, expressed
LOC_Os03g06460.1	47.9686	59.4175	5.91384	3.52863	11.3727	0.0114837	type I inositol-1,4,5-trisphosphate 5-phosphatase, putative, expressed
LOC_Os03g06610.1	85.384	82.9603	4.73108	8.23346	12.985	0.00211777	expressed protein
LOC_Os03g06620.1	2661.3	2476.48	340.637	332.867	7.62842	0.00269814	1,2-dihydroxy-3-keto-5-methylthiopentene dioxygenase protein, putative, expressed
LOC_Os03g06700.1	218.737	135.651	2612.74	3619.2	0.0568665	2.1e-05	3-ketoacyl-CoA synthase, putative, expressed
LOC_Os03g06705.1	728.163	461.887	8077.13	10902.3	0.0627022	3.36e-05	3-ketoacyl-CoA synthase, putative, expressed
LOC_Os03g06760.1	31.6593	30.2693	2.36554	0	26.1795	0.0350517	exocyst complex component 6, putative, expressed
LOC_Os03g06960.1	0.959371	2.24217	98.1698	87.0395	0.0172861	0.00012029	vesicle-associated membrane protein, putative, expressed
LOC_Os03g06970.1	6.7156	4.48434	83.9766	91.7443	0.0637371	0.00237353	tetratricopeptide repeat domain containing protein, expressed
LOC_Os03g07100.1	2631.56	3619.98	781.81	551.642	4.68824	0.0326257	LTPL82 - Protease inhibitor/seed storage/LTP family protein precursor, expressed
LOC_Os03g07190.1	70.9935	70.6284	8.27938	8.23346	8.57646	0.0339945	expressed protein
LOC_Os03g07200.1	354.967	349.779	1.18277	1.17621	298.751	7.81e-10	expressed protein
LOC_Os03g07200.2	19.1874	28.0271	0	0	4365	0.0188941	expressed protein
LOC_Os03g07250.1	23.9843	47.0856	4.73108	0	15.0219	0.0341772	cytochrome P450, putative, expressed
LOC_Os03g07260.1	130.474	205.159	2.36554	3.52863	56.9433	2.79e-06	tetratricopeptide repeat domain containing protein, expressed
LOC_Os03g07450.1	1632.85	1818.4	9252.8	10688.2	0.173073	0.011093	homeobox associated leucine zipper, putative, expressed
LOC_Os03g07540.1	29.7405	34.7536	1.18277	0	54.5281	0.000982382	bHLH family protein, putative, expressed
LOC_Os03g07590.1	34.5374	17.9374	1596.74	1045.65	0.0198588	3.4e-08	expressed protein
LOC_Os03g07600.1	190.915	252.244	5346.12	5775.19	0.0398478	1.46e-06	calcium-binding protein, putative, expressed
LOC_Os03g07810.1	714.732	1139.02	83.9766	41.1673	14.813	8.01e-05	expressed protein
LOC_Os03g07940.1	8.63434	23.5428	0	0	4365	0.0119761	AP2 domain containing protein, expressed
LOC_Os03g07960.1	306.039	141.257	1424.05	1347.94	0.161363	0.00992101	expressed protein
LOC_Os03g08170.1	100.734	118.835	17.7415	14.1145	6.89254	0.0180104	protein kinase APK1B, chloroplast precursor, putative, expressed
LOC_Os03g08460.1	1190.58	552.695	38392.7	37839.8	0.0228679	3.44e-08	AP2 domain containing protein, expressed
LOC_Os03g08490.1	1192.5	921.532	125.374	112.916	8.87169	0.00144959	AP2 domain containing protein, expressed
LOC_Os03g08560.1	270.543	221.975	1091.7	1389.1	0.198532	0.0263162	plasma membrane ATPase, putative, expressed
LOC_Os03g08600.1	612.079	839.693	20.1071	16.4669	39.6941	2.56e-07	glycosyl transferase, putative, expressed
LOC_Os03g08610.1	79.6278	88.5657	2.36554	2.35242	35.6497	0.000112295	leucine-rich repeat family protein, putative, expressed
LOC_Os03g08620.1	482.564	757.854	18.9243	17.6431	33.9214	7.39e-07	B3 DNA binding domain containing protein, expressed
LOC_Os03g08754.1	262.868	477.582	1.18277	0	626.031	4.66e-11	OsMADS47 - MADS-box family gene with MIKCc type-box, expressed
LOC_Os03g08754.2	53.7248	60.5386	2.36554	0	48.3033	0.000248507	OsMADS47 - MADS-box family gene with MIKCc type-box, expressed
LOC_Os03g08940.1	78.6684	70.6284	238.919	624.567	0.1729	0.0189731	expressed protein
LOC_Os03g08980.1	6.7156	0	74.5144	54.1056	0.0522127	0.00164262	expressed protein
LOC_Os03g09020.1	1208.81	1248.89	1.18277	4.70484	417.436	5.97e-13	dehydrogenase, putative, expressed
LOC_Os03g09200.1	58.5216	128.925	7.09661	2.35242	19.8376	0.000458656	domain of unknown function DUF966 domain containing protein, expressed
LOC_Os03g09880.1	7.67497	13.453	0	0	4365	0.0484762	AIR12, putative, expressed
LOC_Os03g09930.1	1361.35	913.684	251.93	230.537	4.71542	0.0328592	sulfate transporter, putative, expressed
LOC_Os03g10030.1	2105.82	2219.75	177.415	194.074	11.6438	0.000241872	membrane associated DUF588 domain containing protein, putative, expressed
LOC_Os03g10090.1	3203.34	3803.84	2.36554	2.35242	1485.22	7.73e-17	transporter family protein, putative, expressed
LOC_Os03g10100.1	43.1717	35.8747	4.73108	0	16.7079	0.0211698	transporter family protein, putative, expressed
LOC_Os03g10250.1	68.1154	45.9645	318.165	504.594	0.138655	0.00668756	expressed protein
LOC_Os03g10260.1	70.9935	94.1712	479.021	409.321	0.185925	0.0213345	expressed protein
LOC_Os03g10320.1	283.974	279.15	60.3212	56.458	4.82212	0.0405978	expressed protein
LOC_Os03g10440.1	47.0092	56.0543	0	10.5859	9.73594	0.0300586	glycosyl hydrolase family 10 protein, putative, expressed
LOC_Os03g10478.1	89.2215	102.019	3.54831	0	53.8962	3.82e-05	glycosyl hydrolase family 10 protein, putative, expressed
LOC_Os03g11140.1	136.231	156.952	15.376	9.40967	11.8287	0.00203363	pleckstrin homology domain-containing protein-related taxo, putative, expressed
LOC_Os03g11210.1	995.827	849.783	4716.88	4730.71	0.195352	0.021585	DUF538 domain containing protein, putative, expressed
LOC_Os03g11400.1	521.898	766.822	24.8381	14.1145	33.0843	8.99e-07	targeting protein-related, putative, expressed
LOC_Os03g11400.2	29.7405	35.8747	1.18277	0	55.476	0.00691441	targeting protein-related, putative, expressed
LOC_Os03g11560.1	655.251	582.964	87.5249	122.326	5.90046	0.0142465	digalactosyldiacylglycerol synthase, chloroplast precursor, putative, expressed
LOC_Os03g11600.1	82.5059	190.584	0	0	4365	2.36e-08	YABBY domain containing protein, putative, expressed
LOC_Os03g11600.2	4.79686	26.906	0	0	4365	0.0223826	YABBY domain containing protein, putative, expressed
LOC_Os03g11680.1	203.387	315.025	9.46215	7.05725	31.382	5.82e-06	ZOS3-05 - C2H2 zinc finger protein, expressed
LOC_Os03g11734.1	138.149	174.889	2.36554	0	132.333	4.85e-07	MATE efflux protein, putative, expressed
LOC_Os03g11770.1	185.159	224.217	37.8486	34.1101	5.68904	0.0216635	expressed protein
LOC_Os03g11780.1	141.028	177.131	15.376	19.9956	8.99477	0.00774394	expressed protein
LOC_Os03g11900.1	1243.35	1373.33	307.52	279.938	4.45423	0.0429291	transporter family protein, putative, expressed
LOC_Os03g12140.1	1105.2	2010.11	221.178	247.004	6.65404	0.00650659	glucan endo-1,3-beta-glucosidase precursor, putative, expressed
LOC_Os03g12260.1	331.942	485.43	96.9871	48.2246	5.62884	0.0201783	cytochrome P450 protein, putative, expressed
LOC_Os03g12270.1	30.6999	44.8434	0	0	4365	0.00174166	dehydrogenase, putative, expressed
LOC_Os03g12290.1	2756.27	2528.05	701.382	458.722	4.55504	0.0350451	glutamine synthetase, catalytic domain containing protein, expressed
LOC_Os03g12470.1	295.486	303.814	1724.48	1885.46	0.166014	0.00995407	OsWAK25 - OsWAK receptor-like protein kinase, expressed
LOC_Os03g12500.1	275.34	312.783	1.18277	1.17621	249.312	2.69e-09	cytochrome P450, putative, expressed
LOC_Os03g12510.1	266.705	122.198	13400.8	9577.87	0.0169246	4.32e-09	non-symbiotic hemoglobin 2, putative, expressed
LOC_Os03g12820.1	353.049	300.451	1484.38	1844.3	0.196324	0.0236494	ATP8, putative, expressed
LOC_Os03g12860.1	69.0747	58.2964	2.36554	2.35242	26.9971	0.000537684	homeobox associated leucine zipper, putative, expressed
LOC_Os03g12900.1	1201.13	885.657	13318	14507.4	0.074996	9.99e-05	squalene monooxygenase, putative, expressed
LOC_Os03g12900.2	2.87811	8.96868	50.8591	71.7487	0.0966235	0.0143657	squalene monooxygenase, putative, expressed
LOC_Os03g12900.4	63.3185	61.6597	448.269	539.88	0.126477	0.0034599	squalene monooxygenase, putative, expressed
LOC_Os03g12940.3	163.093	151.346	23.6554	25.8766	6.34821	0.028776	OsFBO13 - F-box and other domain containing protein, expressed
LOC_Os03g12990.1	349.211	283.635	37.8486	50.577	7.15682	0.00745429	phytosulfokines precursor, putative, expressed
LOC_Os03g13140.1	9.59371	6.72651	370.207	165.845	0.0304452	2.49e-06	non-symbiotic hemoglobin 2, putative, expressed
LOC_Os03g13200.1	3130.43	3108.77	146.663	165.845	19.9649	7.58e-06	peroxidase precursor, putative, expressed
LOC_Os03g13210.1	32.6186	35.8747	0	0	4365	3.82e-05	peroxidase precursor, putative, expressed
LOC_Os03g13300.1	1532.12	1417.05	12378.9	13205.3	0.115273	0.00124117	glutamate decarboxylase, putative, expressed
LOC_Os03g13570.1	849.044	1077.36	144.298	184.665	5.856	0.0128972	glycosyl hydrolases family 16, putative, expressed
LOC_Os03g14010.1	759.822	739.916	105.266	95.2729	7.47852	0.00406139	glycosyl hydrolase family 10 protein, putative, expressed
LOC_Os03g14050.1	3345.33	3332.99	14213.3	18514.7	0.204055	0.0249117	thaumatin-like protein 1 precursor, putative, expressed
LOC_Os03g14080.1	236.005	337.447	14.1932	25.8766	14.3113	0.000229951	transmembrane amino acid transporter protein, putative, expressed
LOC_Os03g14110.1	79.6278	87.4446	410.421	528.118	0.178013	0.0187979	expressed protein
LOC_Os03g14140.1	162.134	133.409	0	7.05725	41.8779	1.8e-05	POEI16 - Pollen Ole e I allergen and extensin family protein precursor, expressed
LOC_Os03g14150.1	20.1468	15.6952	0	0	4365	0.0419871	expressed protein
LOC_Os03g14210.1	220.655	316.146	10.6449	9.40967	26.767	1.52e-05	glycosyl hydrolases family 17, putative, expressed
LOC_Os03g14590.1	1961.91	2180.51	397.41	383.444	5.30499	0.0186107	calcium-binding EF hand family protein, putative, expressed
LOC_Os03g14642.1	2348.54	2205.17	0	0	4365	1.41e-17	LTPL107 - Protease inhibitor/seed storage/LTP family protein precursor, expressed
LOC_Os03g14654.1	3968.92	4605.42	1.18277	2.35242	2425.43	1.2e-17	LTPL108 - Protease inhibitor/seed storage/LTP family protein precursor, expressed
LOC_Os03g14669.1	253.274	357.626	53.2246	30.5814	7.28945	0.00587837	core histone H2A/H2B/H3/H4, putative, expressed
LOC_Os03g14669.2	63.3185	50.4488	7.09661	4.70484	9.64012	0.00885229	core histone H2A/H2B/H3/H4, putative, expressed
LOC_Os03g15020.1	3331.9	4065.05	196.34	164.669	20.4897	6.54e-06	beta-galactosidase precursor, putative, expressed
LOC_Os03g15050.1	693.625	627.808	106.449	139.969	5.36257	0.0207186	phosphoenolpyruvate carboxykinase, putative, expressed
LOC_Os03g15080.1	67.156	19.0584	609.126	542.232	0.0748806	0.000214554	expressed protein
LOC_Os03g15080.2	4.79686	1.12109	37.8486	42.3435	0.073797	0.0288467	expressed protein
LOC_Os03g15180.1	87.3028	85.2025	10.6449	17.6431	6.09817	0.0404913	PH domain containing protein, expressed
LOC_Os03g15270.1	301.243	313.904	1273.84	1923.1	0.192417	0.0213112	gibberellin receptor GID1L2, putative, expressed
LOC_Os03g15410.1	1044.76	874.446	5180.53	5278.83	0.183491	0.0159673	expressed protein
LOC_Os03g15660.1	52.7654	44.8434	767.617	1179.74	0.0501238	1.54e-05	AP2 domain containing protein, expressed
LOC_Os03g16260.1	2.87811	0	234.188	1116.22	0.00213129	2.57e-12	protein kinase, putative, expressed
LOC_Os03g16390.1	305.08	226.459	2551.23	2788.79	0.0995387	0.000646638	avr9/Cf-9 rapidly elicited protein, putative, expressed
LOC_Os03g16500.1	94.0184	117.714	4.73108	12.9383	11.983	0.00260742	aspartic proteinase nepenthesin precursor, putative, expressed
LOC_Os03g16610.1	367.439	323.994	0	1.17621	587.849	2.02e-10	laccase precursor protein, putative, expressed
LOC_Os03g16920.1	58.5216	35.8747	3.54831	7.05725	8.90065	0.0408204	DnaK family protein, putative, expressed
LOC_Os03g16950.1	345.374	168.163	4169.26	2886.42	0.0727834	9.99e-05	cysteine-rich repeat secretory protein 55 precursor, putative, expressed
LOC_Os03g16960.1	41.253	6.72651	656.437	225.832	0.0543819	3.31e-05	cysteine-rich repeat secretory protein 55 precursor, putative, expressed
LOC_Os03g17010.2	123.759	136.772	593.75	658.677	0.208021	0.0347511	RNA recognition motif containing protein, putative, expressed
LOC_Os03g17010.3	12.4718	5.60543	70.9661	70.5725	0.12772	0.0456227	RNA recognition motif containing protein, putative, expressed
LOC_Os03g17130.1	70.9935	75.1127	9.46215	4.70484	10.3131	0.0150027	bHelix-loop-helix transcription factor, putative, expressed
LOC_Os03g17164.1	475.848	552.695	79.2455	129.383	4.93002	0.0309181	kinesin-related protein, putative, expressed
LOC_Os03g17250.1	179.402	241.033	1060.94	1075.06	0.196833	0.0231522	ankyrin repeat-containing protein, putative, expressed
LOC_Os03g17350.1	785.725	766.822	9.46215	4.70484	109.589	6.19e-10	white-brown complex homolog protein, putative, expressed
LOC_Os03g17470.1	465.295	393.501	2.36554	5.88104	104.14	9.55e-09	IN2-1 protein, putative, expressed
LOC_Os03g17500.1	524.776	715.252	132.47	123.502	4.84439	0.032763	expressed protein
LOC_Os03g17680.1	11.5125	22.4217	118.277	121.15	0.141731	0.00901185	expressed protein
LOC_Os03g17790.1	69.0747	33.6326	7.09661	4.70484	8.70294	0.0352447	OsRCI2-5 - Putative low temperature and salt responsive protein, expressed
LOC_Os03g17860.2	42.2123	25.785	1.18277	2.35242	19.2344	0.00427334	OsPDIL5-1 protein disulfide isomerase PDIL5-1, expressed
LOC_Os03g17870.1	233.127	260.092	7.09661	9.40967	29.8807	4.48e-06	metallothionein, putative, expressed
LOC_Os03g17960.1	592.891	827.361	94.6215	128.207	6.37375	0.00927188	expressed protein
LOC_Os03g18030.1	305.08	349.779	7.09661	7.05725	46.2671	5.48e-07	leucoanthocyanidin dioxygenase, putative, expressed
LOC_Os03g18120.1	3761.69	3524.69	212.898	250.533	15.7227	3.65e-05	proteins of unknown function domain containing protein, expressed
LOC_Os03g18130.1	20541.1	18789.4	612.674	745.717	28.9537	4.91e-07	asparagine synthetase, putative, expressed
LOC_Os03g18220.1	4329.64	5349.82	21221.2	22954.9	0.219111	0.0331765	pyruvate decarboxylase isozyme 2, putative, expressed
LOC_Os03g18300.1	427.88	395.743	21.2898	16.4669	21.8139	1.86e-05	chloroplast unusual positioning protein, putative, expressed
LOC_Os03g18350.1	448.026	511.215	80.4283	134.088	4.47165	0.0495197	importin subunit beta, putative, expressed
LOC_Os03g18600.1	977.599	863.236	5098.92	6998.44	0.152168	0.00597449	cyclase/dehydrase family protein, putative, expressed
LOC_Os03g18630.1	901.809	1299.34	31.9348	23.5242	39.6897	1.55e-07	receptor-like kinase RHG1, putative, expressed
LOC_Os03g18640.1	89.2215	91.929	0	0	4365	2.74e-06	laccase precursor protein, putative, expressed
LOC_Os03g18740.1	409.652	367.716	1879.42	2452.4	0.179455	0.0150948	oxidoreductase, short chain dehydrogenase/reductase family, putative, expressed
LOC_Os03g18850.1	237.924	330.72	31.9348	9.40967	13.7538	0.000233049	pathogenesis-related Bet v I family protein, putative, expressed
LOC_Os03g19000.1	20.1468	22.4217	145.481	223.48	0.115374	0.00441933	peroxisomal biogenesis factor 11, putative, expressed
LOC_Os03g19070.1	1251.02	676.014	3873.57	5343.52	0.209072	0.0319363	long cell-linked locus protein, putative, expressed
LOC_Os03g19080.1	1425.63	1702.93	140.75	151.731	10.6966	0.000436856	expressed protein
LOC_Os03g19080.3	30.6999	31.3904	0	1.17621	52.7885	0.00850108	expressed protein
LOC_Os03g19120.1	61.3998	62.7808	1.18277	2.35242	35.127	0.000909124	MYB family transcription factor, putative, expressed
LOC_Os03g19170.1	29.7405	25.785	0	1.17621	47.2071	0.00966397	GCRP7 - Glycine and cysteine rich family protein precursor, expressed
LOC_Os03g19240.1	344.414	377.806	40.2141	41.1673	8.8745	0.00242817	AMP-binding enzyme, putative, expressed
LOC_Os03g19260.1	74.831	78.476	678.909	755.126	0.106906	0.001178	expressed protein
LOC_Os03g19270.1	144.865	117.714	9153.45	8295.8	0.0150482	1.69e-09	universal stress protein domain containing protein, putative, expressed
LOC_Os03g19270.2	30.6999	25.785	2198.77	2018.37	0.0133941	1.32e-09	universal stress protein domain containing protein, putative, expressed
LOC_Os03g19270.4	5.75623	28.0271	93.4387	142.321	0.143296	0.015151	universal stress protein domain containing protein, putative, expressed
LOC_Os03g19390.1	187.077	181.616	2.36554	7.05725	39.1278	1.93e-05	TENA/THI-4 family protein, putative, expressed
LOC_Os03g19540.1	40.2936	63.9019	5.91384	4.70484	9.81247	0.0413575	expressed protein
LOC_Os03g19560.3	34.5374	22.4217	186.877	130.559	0.179434	0.0304871	tetratricopeptide repeat domain containing protein, expressed
LOC_Os03g19600.1	1284.6	1030.28	9979.02	11403.3	0.108261	0.000909722	retrotransposon protein, putative, unclassified, expressed
LOC_Os03g19670.1	1012.14	1159.2	138.384	94.0967	9.33987	0.00104716	GDSL-like lipase/acylhydrolase, putative, expressed
LOC_Os03g19840.1	0	0	56.7729	181.136	0	6.82e-08	cysteine-rich repeat secretory protein 55 precursor, putative, expressed
LOC_Os03g19940.1	41.253	51.5699	0	4.70484	19.7292	0.007877	expressed protein
LOC_Os03g20090.1	382.789	143.499	1925.55	3121.66	0.104273	0.000962826	MYB family transcription factor, putative, expressed
LOC_Os03g20120.1	1084.09	1091.94	29.5692	39.9911	31.2826	8.03e-07	glycosyl transferase 8 domain containing protein, putative, expressed
LOC_Os03g20580.1	289.73	302.693	20.1071	34.1101	10.9269	0.000917869	expressed protein
LOC_Os03g20680.1	340.577	183.858	5.91384	5.88104	44.4629	2.56e-06	late embryogenesis abundant protein 1, putative, expressed
LOC_Os03g20730.1	2.87811	4.48434	36.6658	101.154	0.0534209	0.00300522	chaperone protein dnaJ, putative, expressed
LOC_Os03g20870.1	138.149	139.015	826.755	865.69	0.163765	0.0105671	zinc finger, C3HC4 type domain containing protein, expressed
LOC_Os03g21060.1	891.256	855.388	139.567	101.154	7.25589	0.00453178	No apical meristem protein, putative, expressed
LOC_Os03g21400.1	201.468	171.526	0	0	4365	5.89e-09	cytochrome P450, putative, expressed
LOC_Os03g21419.1	93.059	87.4446	0	0	4365	2.12e-06	retrotransposon protein, putative, Ty1-copia subclass, expressed
LOC_Os03g21480.1	35.4967	42.6012	0	0	4365	0.000343708	HAD superfamily phosphatase, putative, expressed
LOC_Os03g21590.1	41.253	32.5115	1.18277	1.17621	31.2697	0.0106456	expressed protein
LOC_Os03g21730.1	1981.1	2643.52	471.925	509.298	4.71312	0.0323085	receptor-like protein kinase precursor, putative, expressed
LOC_Os03g21800.1	834.653	750.006	4208.29	4315.51	0.18591	0.0168335	bZIP transcription factor family protein, putative, expressed
LOC_Os03g21960.1	49.8873	66.144	0	1.17621	98.6486	0.000855161	aminotransferase, putative, expressed
LOC_Os03g21970.1	910.443	1229.83	53.2246	57.6342	19.3063	1.43e-05	basic helix-loop-helix domain containing protein, expressed
LOC_Os03g22010.1	4676.93	4884.57	29.5692	14.1145	218.88	6.31e-13	peroxidase precursor, putative, expressed
LOC_Os03g22010.3	120.881	110.987	2.36554	0	98.0192	1.47e-05	peroxidase precursor, putative, expressed
LOC_Os03g22020.1	370.317	315.025	4.73108	0	144.86	2.7e-09	peroxidase precursor, putative, expressed
LOC_Os03g22040.1	780.928	985.434	73.3317	57.6342	13.4872	0.000135623	expressed protein
LOC_Os03g22170.1	13.4312	2.24217	141.932	147.026	0.0542409	0.00012377	AP2 domain containing protein, expressed
LOC_Os03g22200.1	422.123	441.708	24.8381	29.4052	15.9251	0.000123007	nodulin MtN3 family protein, putative, expressed
LOC_Os03g22550.1	194.752	239.912	24.8381	41.1673	6.58528	0.0171342	cation efflux family protein, putative, expressed
LOC_Os03g22960.1	112.246	164.8	23.6554	18.8193	6.52261	0.0154832	expressed protein
LOC_Os03g24040.1	547.801	655.835	121.825	89.3919	5.69857	0.0160012	seven in absentia protein family domain containing protein, expressed
LOC_Os03g24560.1	96.8965	117.714	10.6449	16.4669	7.91574	0.0141882	ompA/MotB, putative, expressed
LOC_Os03g24610.1	83.4653	76.2338	8.27938	11.7621	7.96843	0.0270833	endonuclease/exonuclease/phosphatase family domain containing protein, expressed
LOC_Os03g24910.1	126.637	125.562	17.7415	12.9383	8.22034	0.0133753	nodulation protein-related, putative, expressed
LOC_Os03g25030.1	55.6435	22.4217	398.593	252.885	0.119828	0.0041273	GDSL-like lipase/acylhydrolase, putative, expressed
LOC_Os03g25060.1	10.5531	14.5741	95.8043	88.2157	0.136546	0.021945	expressed protein
LOC_Os03g25120.1	10.5531	49.3277	2.36554	3.52863	10.1593	0.0392813	HSF-type DNA-binding domain containing protein, expressed
LOC_Os03g25280.1	337.699	59.4175	50699.4	66424.1	0.00339058	4.6e-14	peroxidase precursor, putative, expressed
LOC_Os03g25300.1	32.6186	8.96868	9177.1	11937.3	0.00196961	2.19e-15	peroxidase precursor, putative, expressed
LOC_Os03g25320.1	17.2687	1.12109	568.912	722.192	0.0142434	2.9e-08	peroxidase precursor, putative, expressed
LOC_Os03g25340.1	127.596	11.2109	5770.73	6422.1	0.0113843	4.38e-10	peroxidase precursor, putative, expressed
LOC_Os03g25360.1	13.4312	0	234.188	175.255	0.0328036	5.64e-05	peroxidase precursor, putative, expressed
LOC_Os03g25370.1	15.3499	1.12109	208.167	214.07	0.0390089	9.88e-05	peroxidase precursor, putative, expressed
LOC_Os03g25460.1	76.7497	76.2338	809.014	1103.28	0.0799998	0.000249537	OsRCI2-4 - Putative low temperature and salt responsive protein, expressed
LOC_Os03g25550.1	128.556	207.401	34.3003	11.7621	7.29351	0.0103271	myb-like DNA-binding domain containing protein, putative, expressed
LOC_Os03g25760.1	264.786	187.221	2228.34	2501.8	0.0955592	0.000535122	calmodulin-binding protein, putative, expressed
LOC_Os03g25930.1	160.215	158.073	9.46215	21.1718	10.3901	0.00343294	emp24/gp25L/p24 family protein, putative, expressed
LOC_Os03g25990.1	73.8716	104.261	0	0	4365	6.25e-06	expansin precursor, putative, expressed
LOC_Os03g26650.1	67.156	113.23	10.6449	14.1145	7.28553	0.0362391	heavy metal-associated domain containing protein, expressed
LOC_Os03g26930.1	248.477	177.131	22.4726	7.05725	14.4128	0.00052865	OsSCP13 - Putative Serine Carboxypeptidase homologue, expressed
LOC_Os03g27120.1	789.563	798.213	80.4283	117.621	8.01707	0.00272969	ICE-like protease p20 domain containing protein, putative, expressed
LOC_Os03g27190.1	404.855	446.192	9.46215	2.35242	72.0337	5.87e-08	ICE-like protease p20 domain containing protein, putative, expressed
LOC_Os03g28090.1	35.4967	19.0584	2.36554	0	23.0625	0.0237806	pectinesterase, putative, expressed
LOC_Os03g28140.1	716.65	641.261	147.846	137.616	4.75688	0.0353983	1-phosphatidylinositol-4-phosphate 5-kinase/ zinc ion binding protein, putative, expressed
LOC_Os03g28160.2	82.5059	100.898	9.46215	14.1145	7.77903	0.0244024	jacalin-like lectin domain containing protein, expressed
LOC_Os03g28300.1	516.142	353.142	16.5588	18.8193	24.5712	9.9e-06	protein kinase domain containing protein, expressed
LOC_Os03g28990.1	716.65	1288.13	138.384	114.092	7.94046	0.002787	zinc finger family protein, putative, expressed
LOC_Os03g29150.1	2196	2495.54	0	0	4365	1.27e-17	NAD dependent epimerase/dehydratase family protein, putative, expressed
LOC_Os03g29150.3	170.768	124.44	0	0	4365	1.53e-07	NAD dependent epimerase/dehydratase family protein, putative, expressed
LOC_Os03g29190.1	1673.14	1640.15	11246.9	10043.6	0.155622	0.00653865	PDI, putative, expressed
LOC_Os03g29190.2	67.156	96.4133	316.982	532.823	0.192479	0.0255907	PDI, putative, expressed
LOC_Os03g29410.1	207.224	154.71	1013.63	946.848	0.184615	0.0196207	tyrosine protein kinase domain containing protein, putative, expressed
LOC_Os03g29540.3	16.3093	0	167.953	125.854	0.0555102	0.00020345	ATP-dependent protease, putative, expressed
LOC_Os03g29920.1	851.922	746.643	140.75	199.956	4.69193	0.0348047	proline-rich protein, putative, expressed
LOC_Os03g30120.1	94.9778	89.6868	13.0105	8.23346	8.69258	0.0102042	expressed protein
LOC_Os03g30200.1	2.87811	7.8476	62.6868	36.4625	0.108177	0.0282128	mitochondrial import inner membrane translocase subunit Tim17, putative, expressed
LOC_Os03g30200.2	0.959371	1.12109	27.2037	21.1718	0.0430065	0.0454629	mitochondrial import inner membrane translocase subunit Tim17, putative, expressed
LOC_Os03g30250.1	2491.49	2635.67	1.18277	2.35242	1450.32	2.61e-16	COBRA-like protein precursor, putative, expressed
LOC_Os03g30260.1	751.188	793.728	10.6449	9.40967	77.0355	4.48e-09	COBRA-like protein precursor, putative, expressed
LOC_Os03g30290.1	58.5216	76.2338	8.27938	9.40967	7.61801	0.0302053	expressed protein
LOC_Os03g30740.1	76.7497	76.2338	7.09661	3.52863	14.3981	0.00377537	expressed protein
LOC_Os03g30950.1	76.7497	132.288	0	1.17621	177.722	2.44e-06	acyl-desaturase, chloroplast precursor, putative, expressed
LOC_Os03g31750.1	561.232	244.397	36201	26516.5	0.0128454	5.65e-10	pyruvate, phosphate dikinase, chloroplast precursor, putative, expressed
LOC_Os03g31750.2	11.5125	12.3319	390.314	346.982	0.0323404	1.76e-06	pyruvate, phosphate dikinase, chloroplast precursor, putative, expressed
LOC_Os03g31750.3	0.959371	0	40.2141	22.348	0.0153347	0.000650114	pyruvate, phosphate dikinase, chloroplast precursor, putative, expressed
LOC_Os03g31880.1	188.037	280.271	20.1071	29.4052	9.45842	0.0025285	SHORT-ROOT, putative, expressed
LOC_Os03g32180.1	16.3093	8.96868	191.609	229.361	0.0600471	0.000424721	polygalacturonase inhibitor 1 precursor, putative, expressed
LOC_Os03g32190.1	13.4312	6.72651	115.911	158.788	0.0733809	0.0024259	transposon protein, putative, unclassified, expressed
LOC_Os03g32230.1	505.589	241.033	2229.52	2506.5	0.157648	0.00883316	ZOS3-12 - C2H2 zinc finger protein, expressed
LOC_Os03g32460.1	77.7091	60.5386	0	0	4365	6.3e-05	retrotransposon, putative, centromere-specific, expressed
LOC_Os03g32470.1	131.434	117.714	0	0	4365	4.59e-07	leucoanthocyanidin dioxygenase, putative, expressed
LOC_Os03g33090.1	45.0904	71.7495	0	0	4365	0.000171205	DUF260 domain containing protein, putative, expressed
LOC_Os03g35920.1	96.8965	88.5657	18.9243	12.9383	5.82069	0.043477	expressed protein
LOC_Os03g36080.1	466.254	543.726	96.9871	124.678	4.55633	0.0454126	expressed protein
LOC_Os03g36160.1	1.91874	2.24217	191.609	210.541	0.0103467	6.78e-07	DNAJ heat shock N-terminal domain-containing protein, putative, expressed
LOC_Os03g36530.1	78.6684	65.0229	10.6449	7.05725	8.11716	0.0328783	FAD-binding and arabino-lactone oxidase domains containing protein, putative, expressed
LOC_Os03g36560.1	148.703	205.159	14.1932	11.7621	13.6335	0.000497527	peroxidase precursor, putative, expressed
LOC_Os03g36630.1	82.5059	32.5115	303.972	295.228	0.191952	0.0336328	expressed protein
LOC_Os03g36650.1	34.5374	26.906	385.583	371.682	0.0811386	0.000650974	cysteine-rich repeat secretory protein 55 precursor, putative, expressed
LOC_Os03g36830.1	26.8624	31.3904	1.18277	4.70484	9.89414	0.042785	expressed protein
LOC_Os03g37290.1	8.63434	43.7223	1.18277	0	44.2662	0.00542368	cytochrome P450, putative, expressed
LOC_Os03g37470.1	91.1403	145.741	16.5588	15.2907	7.43753	0.0199662	MATE efflux family protein, putative, expressed
LOC_Os03g37810.1	294.527	579.601	86.3421	97.6253	4.75154	0.0425454	expressed protein
LOC_Os03g37830.1	72.9122	70.6284	0	1.17621	122.037	4.46e-05	potassium transporter, putative, expressed
LOC_Os03g37840.1	289.73	211.885	4.73108	4.70484	53.1602	8.67e-07	potassium transporter, putative, expressed
LOC_Os03g38330.1	22.0655	6.72651	141.932	136.44	0.10343	0.00452872	disease resistance RPP13-like protein 1, putative, expressed
LOC_Os03g38540.2	279.177	149.104	1062.13	925.676	0.215455	0.0426775	folic acid binding protein, putative, expressed
LOC_Os03g38790.1	295.486	387.895	53.2246	62.3391	5.91347	0.0199457	expressed protein
LOC_Os03g39020.1	3200.46	3678.28	292.144	269.352	12.2507	0.000170493	Kinesin motor domain domain containing protein, expressed
LOC_Os03g39650.1	22.0655	41.4802	0	0	4365	0.0100411	cytochrome P450, putative, expressed
LOC_Os03g40000.1	62.3591	79.597	453.001	515.18	0.146622	0.00779512	expressed protein
LOC_Os03g40160.1	4.79686	2.24217	54.4074	37.6387	0.0764729	0.0374516	transposon protein, putative, unclassified, expressed
LOC_Os03g40440.1	0	0	21.2898	30.5814	0	0.000642866	B12D protein, putative, expressed
LOC_Os03g40490.1	0	0	3.54831	28.229	0	0.0215774	expressed protein
LOC_Os03g40540.1	710.894	656.956	3828.62	4795.4	0.158609	0.00749669	cytochrome P450, putative, expressed
LOC_Os03g40770.1	76.7497	118.835	1.18277	10.5859	16.6191	0.00082416	expressed protein
LOC_Os03g40800.1	0	0	16.5588	25.8766	0	0.0434472	expressed protein
LOC_Os03g41120.1	70.9935	90.8079	4.73108	4.70484	17.1474	0.00261966	expressed protein
LOC_Os03g41130.1	9.59371	11.2109	94.6215	119.973	0.0969481	0.0118819	expressed protein
LOC_Os03g41170.1	30.6999	17.9374	0	0	4365	0.0126835	expressed protein
LOC_Os03g41330.1	19.1874	7.8476	0	0	4365	0.0149131	DUF260 domain containing protein, putative, expressed
LOC_Os03g41390.1	175.565	136.772	1018.36	1312.65	0.133992	0.00379039	ZOS3-15 - C2H2 zinc finger protein, expressed
LOC_Os03g41820.1	126.637	168.163	16.5588	21.1718	7.8133	0.0141326	expressed protein
LOC_Os03g42240.1	70.0341	57.1753	4.73108	2.35242	17.9586	0.0024259	B3 DNA binding domain containing protein, expressed
LOC_Os03g42420.1	6.7156	33.6326	0	3.52863	11.4345	0.0446479	B3 DNA binding domain containing protein, expressed
LOC_Os03g42520.1	31.6593	13.453	0	0	4365	0.0368951	expressed protein
LOC_Os03g42569.1	32.6186	53.8121	1.18277	0	73.0749	0.00175007	expressed protein
LOC_Os03g42600.1	179.402	163.678	30.752	25.8766	6.05844	0.0272788	expressed protein
LOC_Os03g42810.1	667.722	643.503	14.1932	10.5859	52.9166	9.96e-08	endonuclease/exonuclease/phosphatase family domain containing protein, expressed
LOC_Os03g42830.1	90.1809	89.6868	14.1932	4.70484	9.51779	0.0103541	MATE efflux family protein, putative, expressed
LOC_Os03g43400.1	551.638	493.277	2218.87	2370.06	0.227703	0.0446479	OsIAA11 - Auxin-responsive Aux/IAA gene family member, expressed
LOC_Os03g43650.1	521.898	494.399	1.18277	2.35242	287.48	9.11e-11	uncharacterized protein At4g06744 precursor, putative, expressed
LOC_Os03g43810.1	64.2779	85.2025	8.27938	4.70484	11.5125	0.00689249	helix-loop-helix DNA-binding domain containing protein, expressed
LOC_Os03g44000.1	131.434	165.921	2.36554	4.70484	42.0564	4.76e-05	LTPL15 - Protease inhibitor/seed storage/LTP family protein precursor, expressed
LOC_Os03g44020.1	141.028	195.069	701.382	1064.47	0.190331	0.0209052	AGC_PVPK_like_kin82y.9 - ACG kinases include homologs to PKA, PKG and PKC, expressed
LOC_Os03g44140.1	12.4718	15.6952	127.739	139.969	0.105215	0.00590926	OsWAK26 - OsWAK receptor-like protein kinase, expressed
LOC_Os03g44890.1	1188.66	1713.02	35.4831	36.4625	40.3316	1.11e-07	anthranilate phosphoribosyltransferase, putative, expressed
LOC_Os03g45210.1	135.271	124.44	9.46215	1.17621	24.4128	0.000244756	2-aminoethanethiol dioxygenase, putative, expressed
LOC_Os03g45250.1	101.693	105.382	7731.76	11139.9	0.0109728	1.8e-10	2-aminoethanethiol dioxygenase, putative, expressed
LOC_Os03g45280.1	1865.98	2103.16	332.358	423.435	5.25161	0.0193005	dehydrin, putative, expressed
LOC_Os03g45619.1	2766.83	3247.78	1.18277	0	5085.19	1.27e-17	cytochrome P450, putative, expressed
LOC_Os03g46060.1	566.988	533.637	66.2351	107.035	6.35208	0.00995323	thaumatin family domain containing protein, expressed
LOC_Os03g46090.1	849.044	909.2	204.619	157.612	4.85393	0.0300489	endonuclease/exonuclease/phosphatase family domain containing protein, expressed
LOC_Os03g46150.1	262.868	349.779	2.36554	0	258.988	1.1e-09	LTPL72 - Protease inhibitor/seed storage/LTP family protein precursor, expressed
LOC_Os03g46150.2	60.4404	79.597	0	0	4365	5.63e-06	LTPL72 - Protease inhibitor/seed storage/LTP family protein precursor, expressed
LOC_Os03g46600.1	676.357	1275.79	193.974	228.185	4.62421	0.0407757	acidic leucine-rich nuclear phosphoprotein 32-related protein 2, putative, expressed
LOC_Os03g46920.1	1534.03	2011.23	67.4178	51.7532	29.7494	6.85e-07	expressed protein
LOC_Os03g46930.1	8.63434	33.6326	166.77	158.788	0.129829	0.00844074	expressed protein
LOC_Os03g47140.1	345.374	436.102	56.7729	36.4625	8.38175	0.00278106	growth regulating factor protein, putative, expressed
LOC_Os03g47270.1	372.236	357.626	3297.56	4320.22	0.0958104	0.000452687	GCRP4 - Glycine and cysteine rich family protein precursor, expressed
LOC_Os03g47470.1	46.0498	69.5073	5.91384	7.05725	8.90881	0.0242464	STE_PAK_Ste20_STLK.4 - STE kinases include homologs to sterile 7, sterile 11 and sterile 20 from yeast, expressed
LOC_Os03g47530.1	737.756	537	2390.38	4067.33	0.197401	0.0237806	glycosyl transferase 8 domain containing protein, putative, expressed
LOC_Os03g47610.1	3139.06	5910.36	430.528	359.92	11.4485	0.000277594	thiamine biosynthesis protein thiC, putative, expressed
LOC_Os03g47610.2	269.583	418.165	86.3421	54.1056	4.89683	0.0417211	thiamine biosynthesis protein thiC, putative, expressed
LOC_Os03g47610.8	49.8873	68.3862	1.18277	1.17621	50.1376	0.000521273	thiamine biosynthesis protein thiC, putative, expressed
LOC_Os03g47650.1	282.055	431.618	66.2351	44.6959	6.43349	0.0121453	ankyrin, putative, expressed
LOC_Os03g47730.1	177.484	272.424	15.376	11.7621	16.5784	0.000192875	homeobox domain containing protein, expressed
LOC_Os03g47810.1	186.118	117.714	0	0	4365	9.23e-08	nodulin family protein, putative, expressed
LOC_Os03g47940.1	3806.79	5172.69	664.716	559.875	7.33263	0.00334467	GDSL-like lipase/acylhydrolase, putative, expressed
LOC_Os03g48310.1	180.362	189.463	10.6449	9.40967	18.4409	0.000287478	plasma membrane ATPase, putative, expressed
LOC_Os03g48490.1	581.379	705.163	60.3212	96.4491	8.20654	0.00257487	centromere protein, putative, expressed
LOC_Os03g48540.1	1165.64	826.24	5559.01	6747.91	0.16185	0.00868819	expressed protein
LOC_Os03g48600.1	1598.31	1800.46	126.556	96.4491	15.2408	5.44e-05	domain of unknown function DUF966 domain containing protein, expressed
LOC_Os03g48600.11	98.8152	93.0501	4.73108	15.2907	9.58282	0.0113786	1 domain of unknown function DUF966 domain containing protein, expressed
LOC_Os03g48600.5	43.1717	60.5386	1.18277	1.17621	43.9641	0.00232626	domain of unknown function DUF966 domain containing protein, expressed
LOC_Os03g48610.1	118.003	136.772	10.6449	24.7004	7.20817	0.0218365	galactosyltransferase family protein, putative, expressed
LOC_Os03g48770.1	31.6593	48.2067	0	0	4365	0.00104877	Cupin domain containing protein, expressed
LOC_Os03g48780.1	26.8624	31.3904	0	0	4365	0.0053621	Cupin domain containing protein, expressed
LOC_Os03g48810.1	664.844	589.691	35.4831	19.9956	22.6129	6.26e-06	nucleobase-ascorbate transporter, putative, expressed
LOC_Os03g49050.1	19.1874	29.1482	0	0	4365	0.00452624	possible lysine decarboxylase domain containing protein, expressed
LOC_Os03g49350.1	1718.23	2187.24	81.6111	138.793	17.7196	2.03e-05	lipozygenase protein, putative, expressed
LOC_Os03g49380.1	4431.34	4349.81	21356.1	18201.8	0.221982	0.0368369	lipoxygenase, putative, expressed
LOC_Os03g49524.1	51.806	33.6326	523.967	371.682	0.095393	0.000696704	anthocyanidin 3-O-glucosyltransferase, putative, expressed
LOC_Os03g49720.1	597.688	565.027	114.729	107.035	5.24304	0.0236368	PAP fibrillin family domain containing protein, expressed
LOC_Os03g49880.1	40.2936	43.7223	2.36554	0	35.5166	0.000201725	TCP family transcription factor, putative, expressed
LOC_Os03g50030.1	1282.68	1522.43	5285.79	6869.06	0.230781	0.042785	phospholipase A2, putative, expressed
LOC_Os03g50140.1	161.174	238.791	0	1.17621	340.046	2.89e-09	plastocyanin-like domain containing protein, putative, expressed
LOC_Os03g50280.1	520.939	439.465	2566.61	2905.24	0.175517	0.013445	GLTP domain containing protein, putative, expressed
LOC_Os03g50420.1	238.883	365.474	8.27938	5.88104	42.6793	1.2e-06	expressed protein
LOC_Os03g50920.1	24.9437	25.785	177.415	314.048	0.10322	0.00254058	ZF-HD protein dimerisation region containing protein, expressed
LOC_Os03g51010.1	230.249	239.912	15.376	19.9956	13.2921	0.000731212	hydrolase, alpha/beta fold family domain containing protein, expressed
LOC_Os03g51110.1	249.437	204.038	2.36554	0	191.7	1.02e-08	MYB family transcription factor, putative, expressed
LOC_Os03g51150.1	2341.83	2923.79	315.799	316.4	8.32904	0.00174071	expressed protein
LOC_Os03g51230.1	1167.55	1572.88	294.509	271.704	4.83993	0.0296161	SNF2 family N-terminal domain containing protein, expressed
LOC_Os03g51430.1	1241.43	1193.96	31.9348	47.0484	30.8342	8.92e-07	SEC14 cytosolic factor family protein, putative, expressed
LOC_Os03g51459.1	79.6278	70.6284	1350.72	1362.05	0.0553884	1.86e-05	expressed protein
LOC_Os03g51530.1	6.7156	32.5115	502.677	750.421	0.0313041	5.67e-07	expressed protein
LOC_Os03g51690.1	21.1062	96.4133	0	0	4365	2.27e-06	Homeobox domain containing protein, expressed
LOC_Os03g51910.1	118.003	123.319	15.376	21.1718	6.60292	0.0203005	basic helix-loop-helix protein, putative, expressed
LOC_Os03g51980.1	81.5466	95.2922	2.36554	1.17621	49.9298	6.79e-05	expressed protein
LOC_Os03g51990.1	0.959371	2.24217	55.5901	51.7532	0.0298252	0.00168524	ACT domain containing protein, expressed
LOC_Os03g52010.1	207.224	291.482	60.3212	32.9339	5.34777	0.0244024	lecithin cholesterol acyltransferase, putative, expressed
LOC_Os03g52070.1	3039.29	3044.87	81.6111	54.1056	44.8298	3.39e-08	OsSCP20 - Putative Serine Carboxypeptidase homologue, expressed
LOC_Os03g52320.1	262.868	590.812	3.54831	0	240.588	1.94e-10	GRF-interacting factor 1, putative, expressed
LOC_Os03g52390.1	382.789	281.392	63.8695	74.1012	4.81393	0.0436732	PIII1 - Proteinase inhibitor II family protein precursor, expressed
LOC_Os03g52650.1	1009.26	1466.38	127.739	65.8677	12.7869	0.000167173	syntaxin-related protein, putative, expressed
LOC_Os03g52860.1	8891.45	10092	581.922	1049.18	11.6384	0.000223335	lipoxygenase, putative, expressed
LOC_Os03g52910.1	125.678	78.476	15.376	8.23346	8.64711	0.00441933	uncharacterized UPF0114 domain containing protein, expressed
LOC_Os03g52920.1	0.959371	0	83.9766	121.15	0.00467698	4.04e-06	expressed protein
LOC_Os03g53070.1	686.91	639.019	2464.89	3249.87	0.232018	0.0472461	prenylated rab acceptor, putative, expressed
LOC_Os03g53150.1	8065.43	5603.18	26622.9	33571.4	0.227075	0.042785	OsIAA13 - Auxin-responsive Aux/IAA gene family member, expressed
LOC_Os03g53200.1	954.574	710.768	3667.77	3753.28	0.224408	0.0415415	OsCML4 - Calmodulin-related calcium sensor protein, expressed
LOC_Os03g53300.1	357.845	461.887	1.18277	4.70484	139.23	5.13e-09	expressed protein
LOC_Os03g53580.1	164.052	281.392	14.1932	11.7621	17.162	0.000151855	expressed protein
LOC_Os03g53690.1	2669.93	4540.39	24.8381	10.5859	203.543	1.65e-12	oxidoreductase, short chain dehydrogenase/reductase family domain containing protein, expressed
LOC_Os03g53750.1	587.135	482.067	87.5249	97.6253	5.77478	0.0159565	nuclear prelamin A recognition factor, putative, expressed
LOC_Os03g53790.1	54.6842	128.925	8.27938	11.7621	9.16145	0.0162932	periplasmic beta-glucosidase precursor, putative, expressed
LOC_Os03g53860.1	10036	11216.5	2138.45	2211.27	4.88593	0.0255113	periplasmic beta-glucosidase precursor, putative, expressed
LOC_Os03g53860.2	218.737	269.06	26.0209	29.4052	8.80085	0.00308332	periplasmic beta-glucosidase precursor, putative, expressed
LOC_Os03g53860.3	566.988	566.148	46.128	35.2863	13.9182	0.000159764	periplasmic beta-glucosidase precursor, putative, expressed
LOC_Os03g53860.4	13.4312	22.4217	0	0	4365	0.0488758	periplasmic beta-glucosidase precursor, putative, expressed
LOC_Os03g53860.5	27.8218	32.5115	1.18277	3.52863	12.8058	0.0496346	periplasmic beta-glucosidase precursor, putative, expressed
LOC_Os03g53970.1	143.906	205.159	21.2898	36.4625	6.04416	0.0250557	expressed protein
LOC_Os03g54130.1	115.125	237.67	0	0	4365	2.76e-08	cysteine protease 1 precursor, putative, expressed
LOC_Os03g54910.1	1605.03	2274.68	445.904	434.021	4.40914	0.0439806	X8 domain containing protein, expressed
LOC_Os03g55010.1	137.19	204.038	16.5588	12.9383	11.5682	0.00149727	UDP-glucoronosyl and UDP-glucosyl transferase domain containing protein, expressed
LOC_Os03g55030.1	14.3906	14.5741	0	0	4365	0.030451	UDP-glucoronosyl and UDP-glucosyl transferase domain containing protein, expressed
LOC_Os03g55100.1	679.235	912.563	10.6449	9.40967	79.3733	4.37e-09	cyclic nucleotide-gated ion channel 2, putative, expressed
LOC_Os03g55220.1	70.9935	81.8392	1.18277	10.5859	12.9864	0.0035394	bHelix-loop-helix transcription factor, putative, expressed
LOC_Os03g55250.1	39.3342	44.8434	7.09661	0	11.8617	0.0100233	cytochrome P450 81E1, putative, expressed
LOC_Os03g55260.1	118.962	116.593	26.0209	5.88104	7.38371	0.0207186	cytochrome P450, putative, expressed
LOC_Os03g55530.1	23.9843	50.4488	0	8.23346	9.04032	0.0282343	HLS, putative, expressed
LOC_Os03g55610.1	20.1468	57.1753	1.18277	2.35242	21.8722	0.00241366	dof zinc finger domain containing protein, putative, expressed
LOC_Os03g55620.2	27.8218	33.6326	2.36554	1.17621	17.3514	0.0183282	CAMK_CAMK_like_Aur_like.2 - CAMK includes calcium/calmodulin depedent protein kinases, expressed
LOC_Os03g55670.1	189.956	226.459	1688.99	1592.59	0.126895	0.00230112	expressed protein
LOC_Os03g55680.1	18.2281	15.6952	855.142	304.638	0.0292497	4.62e-07	expressed protein
LOC_Os03g55760.1	148.703	173.768	11.8277	12.9383	13.0207	0.000857088	MYB family transcription factor, putative, expressed
LOC_Os03g55850.1	7816	6356.55	31415.5	31075.4	0.226794	0.0415415	cold acclimation protein WCOR413, putative, expressed
LOC_Os03g55890.1	254.233	344.173	63.8695	63.5153	4.69763	0.0441517	ternary complex factor MIP1, putative, expressed
LOC_Os03g56070.1	823.141	1133.42	29.5692	28.229	33.8515	4.74e-07	expressed protein
LOC_Os03g56090.1	34.5374	39.238	2.36554	0	31.1876	0.00937441	MYB family transcription factor, putative, expressed
LOC_Os03g56160.1	526.695	429.376	131.287	82.3346	4.47552	0.04447	lectin-like receptor kinase 7, putative, expressed
LOC_Os03g56370.1	47.9686	62.7808	0	0	4365	3.63e-06	methyltransferase, putative, expressed
LOC_Os03g56430.1	463.376	367.716	43.7625	18.8193	13.2801	0.000267621	expressed protein
LOC_Os03g56460.2	10.5531	11.2109	277.951	234.066	0.0425063	1.49e-05	glucose-6-phosphate isomerase, putative, expressed
LOC_Os03g56500.1	23.0249	28.0271	0	0	4365	0.000554189	expressed protein
LOC_Os03g56580.1	90.1809	106.503	2.36554	1.17621	55.533	5.07e-05	no apical meristem protein, putative, expressed
LOC_Os03g56700.1	155.418	327.357	18.9243	15.2907	14.11	0.000329593	expressed protein
LOC_Os03g56820.1	1841.99	1624.45	21608	22849	0.0779729	0.00012103	fatty acid hydroxylase, putative, expressed
LOC_Os03g56820.2	322.349	269.06	4241.41	4481.36	0.0678007	5.64e-05	fatty acid hydroxylase, putative, expressed
LOC_Os03g56820.3	12.4718	7.8476	104.084	128.207	0.0874742	0.00425771	fatty acid hydroxylase, putative, expressed
LOC_Os03g56944.1	98.8152	109.866	1.18277	0	176.435	5.5e-06	lysine-rich arabinogalactan protein 19 precursor, putative, expressed
LOC_Os03g57050.1	51.806	57.1753	3.54831	2.35242	18.4692	0.00377537	expressed protein
LOC_Os03g57080.1	128.556	190.584	11.8277	5.88104	18.0216	0.000279859	PLA IIIA/PLP7, putative, expressed
LOC_Os03g57220.1	2656.5	3624.47	727.403	541.056	4.95165	0.0252312	hydroxyacid oxidase 1, putative, expressed
LOC_Os03g57240.1	620.713	794.849	29.5692	32.9339	22.6479	9.2e-06	ZOS3-19 - C2H2 zinc finger protein, expressed
LOC_Os03g57490.1	39.3342	26.906	1289.22	2432.4	0.0177988	9.7e-09	fasciclin domain containing protein, expressed
LOC_Os03g57490.2	6.7156	2.24217	69.7834	95.2729	0.054271	0.000405085	fasciclin domain containing protein, expressed
LOC_Os03g57950.1	218.737	244.397	8.27938	11.7621	23.1087	2.91e-05	type I inositol-1,4,5-trisphosphate 5-phosphatase, putative, expressed
LOC_Os03g57970.1	1130.14	1271.31	37.8486	77.6298	20.7957	8.98e-06	LTPL73 - Protease inhibitor/seed storage/LTP family protein precursor, expressed
LOC_Os03g57980.1	144.865	151.346	2.36554	4.70484	41.8948	1.25e-05	LTPL99 - Protease inhibitor/seed storage/LTP family protein precursor, expressed
LOC_Os03g57990.1	96.8965	96.4133	3.54831	1.17621	40.9163	6.3e-05	LTPL74 - Protease inhibitor/seed storage/LTP family protein precursor, expressed
LOC_Os03g58230.1	834.653	1007.86	83.9766	65.8677	12.2962	0.00024721	plant-specific domain TIGR01615 family protein, expressed
LOC_Os03g58290.1	214.899	150.225	0	4.70484	77.6062	2.61e-06	indole-3-glycerol phosphate lyase, chloroplast precursor, putative, expressed
LOC_Os03g58300.1	146.784	167.042	2.36554	0	132.666	1.34e-06	indole-3-glycerol phosphate lyase, chloroplast precursor, putative, expressed
LOC_Os03g58490.1	359.764	237.67	1864.04	2057.19	0.152359	0.00719602	DUF593 domain containing protein, expressed
LOC_Os03g58580.1	1178.11	1354.27	130.105	144.674	9.21608	0.00108015	nodulin, putative, expressed
LOC_Os03g58850.1	24.9437	59.4175	1.18277	10.5859	7.1683	0.0330046	uncharacterized PE-PGRS family protein PE_PGRS3 precursor, putative, expressed
LOC_Os03g58870.1	48.9279	63.9019	3.54831	14.1145	6.38798	0.0495197	expressed protein
LOC_Os03g58880.1	37.4155	60.5386	755.789	1240.9	0.0490582	8.26e-06	oxidoreductase, putative, expressed
LOC_Os03g58890.1	138.149	204.038	1777.7	2254.79	0.0848574	0.000213183	oxidoreductase, putative, expressed
LOC_Os03g58890.2	24.9437	40.3591	329.993	501.065	0.0785779	0.000282875	oxidoreductase, putative, expressed
LOC_Os03g58900.1	675.397	908.079	61.504	90.5681	10.4127	0.000650974	galactosyltransferase family protein, putative, expressed
LOC_Os03g59090.1	165.012	77.3549	811.379	805.703	0.149879	0.0076643	retrotransposon protein, putative, unclassified, expressed
LOC_Os03g59090.2	134.312	72.8705	604.395	523.413	0.183704	0.0216828	retrotransposon protein, putative, unclassified, expressed
LOC_Os03g59100.1	72.9122	98.6555	0	0	4365	1.67e-05	pheophorbide a oxygenase, chloroplast precursor, putative, expressed
LOC_Os03g59120.1	18.2281	41.4802	0	0	4365	0.012291	pheophorbide a oxygenase, chloroplast precursor, putative, expressed
LOC_Os03g59290.1	503.67	443.95	42.5797	45.8722	10.7134	0.000926787	C-methyltransferase, putative, expressed
LOC_Os03g59300.1	1173.31	1655.84	43.7625	61.1629	26.9635	1.78e-06	expressed protein
LOC_Os03g59440.1	362.642	15.6952	4071.09	4396.67	0.0446798	5.89e-06	dirigent, putative, expressed
LOC_Os03g60210.1	39.3342	20.1795	637.512	710.43	0.0441515	8.95e-06	DUF567 domain containing protein, putative, expressed
LOC_Os03g60340.1	3088.22	3899.13	334.724	415.202	9.31739	0.000899211	leaf senescence related protein, putative, expressed
LOC_Os03g60430.1	1360.39	1475.35	175.05	154.083	8.61577	0.00155305	AP2 domain containing protein, expressed
LOC_Os03g60430.2	141.028	156.952	18.9243	19.9956	7.65623	0.0114801	AP2 domain containing protein, expressed
LOC_Os03g60440.1	14.3906	2.24217	93.4387	59.9867	0.108409	0.0101844	expressed protein
LOC_Os03g60480.1	1204.97	1746.65	79.2455	130.559	14.0684	8.48e-05	heavy metal-associated domain containing protein, expressed
LOC_Os03g60509.1	3569.82	4287.03	377.303	382.268	10.3438	0.000485154	expressed protein
LOC_Os03g60509.2	637.982	607.628	39.0314	52.9294	13.545	0.000210506	expressed protein
LOC_Os03g60560.1	298.364	122.198	700.199	1452.62	0.195355	0.0279379	ZOS3-21 - C2H2 zinc finger protein, expressed
LOC_Os03g60570.1	475.848	163.678	1372.01	2604.13	0.160841	0.010364	ZOS3-22 - C2H2 zinc finger protein, expressed
LOC_Os03g60620.1	6186.03	7510.15	48.4935	83.5108	103.755	8.56e-11	DnaK family protein, putative, expressed
LOC_Os03g60720.1	1385.33	1642.39	120.642	94.0967	14.0995	8.6e-05	expansin precursor, putative, expressed
LOC_Os03g60840.1	144.865	164.8	857.507	825.699	0.183973	0.018629	BBTI13 - Bowman-Birk type bran trypsin inhibitor precursor, expressed
LOC_Os03g61150.1	25.903	22.4217	3787.23	2960.52	0.00716161	1.6e-11	expressed protein
LOC_Os03g61150.2	0	5.60543	281.499	239.947	0.0107498	2.89e-08	expressed protein
LOC_Os03g61160.1	0	0	852.776	709.254	0	1.59e-14	expressed protein
LOC_Os03g61160.2	0	0	22.4726	11.7621	0	0.0499467	expressed protein
LOC_Os03g61160.3	0	0	72.1489	38.8149	0	9.67e-05	expressed protein
LOC_Os03g61270.1	75.7903	125.562	15.376	14.1145	6.82768	0.0304373	OsMan04 - Endo-Beta-Mannanase, expressed
LOC_Os03g61470.1	9.59371	8.96868	192.791	266.999	0.0403714	5.19e-05	uncharacterized Cys-rich domain containing protein, putative, expressed
LOC_Os03g61500.1	18.2281	7.8476	396.228	378.739	0.0336474	4.48e-06	uncharacterized Cys-rich domain containing protein, putative, expressed
LOC_Os03g61670.1	1762.36	1887.91	27.2037	36.4625	57.3346	1.06e-08	calreticulin precursor, putative, expressed
LOC_Os03g61720.1	1213.6	1436.11	14.1932	7.05725	124.69	1.77e-10	glycerol-3-phosphate acyltransferase, putative, expressed
LOC_Os03g61740.1	1052.43	1327.36	70.9661	78.806	15.8894	5.39e-05	sex determination protein tasselseed-2, putative, expressed
LOC_Os03g61970.1	4777.67	4204.07	30361.7	29900.4	0.149045	0.00524578	actin, putative, expressed
LOC_Os03g62060.1	8452.06	10065.1	3.54831	0	5218.59	5.01e-20	hydrolase, putative, expressed
LOC_Os03g62480.1	23.0249	25.785	0	1.17621	41.4976	0.0389612	anthocyanidin 5,3-O-glucosyltransferase, putative, expressed
LOC_Os03g63370.1	4151.2	4026.94	461.28	394.03	9.56161	0.000716097	CRAL/TRIO domain containing protein, expressed
LOC_Os03g63540.1	2164.34	2505.63	348.917	370.506	6.49127	0.0068556	lysine-rich arabinogalactan protein 19 precursor, putative, expressed
LOC_Os03g63760.1	601.526	614.355	2605.64	2749.98	0.227029	0.0422685	glycosyl hydrolases family 16, putative, expressed
LOC_Os03g63770.2	272.461	317.267	1813.18	1759.61	0.165061	0.00908975	RCD1, putative, expressed
LOC_Os03g63770.3	14.3906	17.9374	186.877	148.202	0.0964783	0.00154568	RCD1, putative, expressed
LOC_Os03g63770.4	26.8624	28.0271	183.329	138.793	0.1704	0.0198257	RCD1, putative, expressed
LOC_Os03g63930.1	1280.76	1228.71	143.115	128.207	9.24905	0.00110632	acyl carrier protein, putative, expressed
LOC_Os03g63970.1	368.399	319.509	3206.49	2858.19	0.113429	0.00121133	gibberellin 20 oxidase 1, putative, expressed
LOC_Os04g01354.1	5.75623	0	109.998	84.687	0.0295669	0.000424721	chalcone synthase, putative, expressed
LOC_Os04g01610.1	349.211	488.793	17.7415	22.348	20.9033	2.11e-05	expressed protein
LOC_Os04g01690.1	661.966	997.766	78.0627	58.8104	12.1261	0.000328974	pyridoxal-dependent decarboxylase protein, putative, expressed
LOC_Os04g01710.1	219.696	663.682	2.36554	1.17621	249.419	7.39e-10	cysteine proteinase At4g11310 precursor, putative, expressed
LOC_Os04g01860.1	0.959371	0	20.1071	21.1718	0.0232412	0.036889	cysteine-rich receptor-like protein kinase 7 precursor, putative, expressed
LOC_Os04g01874.1	17.2687	2.24217	257.844	222.304	0.0406352	2.98e-05	protein kinase, putative, expressed
LOC_Os04g02970.1	34.5374	21.3006	0	0	4365	0.0170161	subtilisin-like protease precursor, putative, expressed
LOC_Os04g03810.1	270.543	377.806	2.36554	2.35242	137.421	2.33e-08	OsSub38 - Putative Subtilisin homologue, expressed
LOC_Os04g04330.1	90.1809	76.2338	10.6449	3.52863	11.7412	0.00177319	receptor-like protein kinase 2 precursor, putative, expressed
LOC_Os04g04640.1	18.2281	15.6952	0	0	4365	0.0250225	decarboxylase, putative, expressed
LOC_Os04g05580.1	61.3998	41.4802	0	0	4365	0.000348614	kinase, putative, expressed
LOC_Os04g05700.1	4.79686	1.12109	392.679	345.805	0.00801363	4.59e-09	expressed protein
LOC_Os04g06510.1	47.9686	41.4802	4.73108	5.88104	8.42892	0.0496316	expressed protein
LOC_Os04g08060.1	78.6684	102.019	438.807	557.523	0.181353	0.0201974	ZOS4-03 - C2H2 zinc finger protein, expressed
LOC_Os04g08280.1	272.461	267.939	10.6449	7.05725	30.5274	1.19e-05	retrotransposon protein, putative, Ty3-gypsy subclass, expressed
LOC_Os04g08550.1	53.7248	85.2025	2.36554	2.35242	29.4465	0.000885095	oxidoreductase, aldo/keto reductase family protein, putative, expressed
LOC_Os04g09260.1	0	0	52.0418	55.2818	0	0.000194903	transferase family protein, putative, expressed
LOC_Os04g09570.1	5.75623	3.36326	68.6006	62.3391	0.0696464	0.00204612	expressed protein
LOC_Os04g09590.1	216.818	247.76	27.2037	23.5242	9.15824	0.0027236	transferase family protein, putative, expressed
LOC_Os04g09800.1	201.468	235.428	21.2898	14.1145	12.3402	0.000930536	SWI/SNF-related matrix-associated actin-dependent regulator of chromatin subfamily A, putative, expressed
LOC_Os04g09900.1	280.136	278.029	0	0	4365	3.07e-10	ent-kaurene synthase, chloroplast precursor, putative, expressed
LOC_Os04g09920.1	201.468	130.046	0	0	4365	2.63e-08	cytochrome P450, putative, expressed
LOC_Os04g10000.1	131.434	143.499	5.91384	0	46.4897	3.78e-05	sex determination protein tasselseed-2, putative, expressed
LOC_Os04g10010.1	187.077	197.311	50.8591	9.40967	6.37791	0.0243839	sex determination protein tasselseed-2, putative, expressed
LOC_Os04g10060.1	14.3906	59.4175	0	0	4365	0.00386031	ent-kaurene synthase, chloroplast precursor, putative, expressed
LOC_Os04g10160.1	96.8965	190.584	7.09661	9.40967	17.4165	0.00108654	cytochrome P450, putative, expressed
LOC_Os04g10434.1	56.6029	41.4802	1.18277	0	82.9266	0.00100794	amidase family protein, putative, expressed
LOC_Os04g10750.1	41.253	32.5115	0	2.35242	31.3569	0.00175663	inorganic phosphate transporter, putative, expressed
LOC_Os04g11400.1	182.281	173.768	3.54831	5.88104	37.7596	1.21e-05	expressed protein
LOC_Os04g11400.2	66.1966	48.2067	0	2.35242	48.6322	0.000771475	expressed protein
LOC_Os04g11970.1	3434.55	3708.55	42.5797	22.348	110.016	8.27e-11	O-methyltransferase, putative, expressed
LOC_Os04g12499.1	34.5374	39.238	203.436	275.233	0.154126	0.0135979	amino acid transporter protein, putative, expressed
LOC_Os04g12530.1	7.67497	6.72651	65.0523	92.9205	0.0911643	0.0081392	amino acid transporter family protein, putative, expressed
LOC_Os04g14690.1	564.11	580.722	4405.81	4295.52	0.13157	0.00278063	flavin-containing monooxygenase family protein, putative, expressed
LOC_Os04g14810.1	30.6999	58.2964	0	0	4365	0.000343708	3-5 exonuclease domain-containing protein, putative, expressed
LOC_Os04g15690.1	1662.59	1334.09	86.3421	44.6959	22.8688	4.07e-06	DSBA-like thioredoxin domain containing protein, expressed
LOC_Os04g15800.1	812.587	1124.45	22.4726	32.9339	34.9605	3.83e-07	expressed protein
LOC_Os04g15920.1	527.654	730.948	47.3108	28.229	16.6614	6.87e-05	dehydrogenase, putative, expressed
LOC_Os04g16970.1	266.705	181.616	2.36554	2.35242	95.0244	1.8e-07	zinc finger, C3HC4 type domain containing protein, expressed
LOC_Os04g17660.1	210.102	224.217	7731.76	7624.19	0.0282835	1.38e-07	rhodanese-like domain containing protein, putative, expressed
LOC_Os04g17660.2	32.6186	33.6326	2205.86	1689.04	0.0170097	6.67e-09	rhodanese-like domain containing protein, putative, expressed
LOC_Os04g17660.3	7.67497	11.2109	206.985	270.528	0.0395504	1.11e-05	rhodanese-like domain containing protein, putative, expressed
LOC_Os04g18570.1	32.6186	22.4217	164.405	121.15	0.192749	0.0498076	retrotransposon protein, putative, unclassified, expressed
LOC_Os04g19140.1	153.499	219.733	4.73108	4.70484	39.5544	3.57e-06	expressed protein
LOC_Os04g19740.1	263.827	278.029	2.36554	4.70484	76.6376	2.03e-07	transketolase, chloroplast precursor, putative, expressed
LOC_Os04g20164.1	6338.57	6199.6	319.348	388.149	17.7219	1.52e-05	amine oxidase precursor, putative, expressed
LOC_Os04g20164.2	198.59	154.71	5.91384	4.70484	33.2715	3e-05	amine oxidase precursor, putative, expressed
LOC_Os04g20560.1	35.4967	32.5115	0	0	4365	0.00495184	methyl-CpG binding domain containing protein, expressed
LOC_Os04g22380.1	55.6435	32.5115	2.36554	1.17621	24.8903	0.00188741	short chain dehydrogenase/reductase protein, putative, expressed
LOC_Os04g22900.2	94.0184	77.3549	1.18277	1.17621	72.6473	0.000188187	jasmonate-induced protein, putative, expressed
LOC_Os04g23140.1	29.7405	24.6639	248.381	275.233	0.103902	0.00308302	expressed protein
LOC_Os04g23220.1	103.612	247.76	22.4726	7.05725	11.8989	0.00111748	expressed protein
LOC_Os04g23440.1	33.578	50.4488	7.09661	2.35242	8.89264	0.0470312	helix-loop-helix DNA-binding domain containing protein, expressed
LOC_Os04g23550.2	43.1717	29.1482	165.588	239.947	0.178332	0.0392523	basic helix-loop-helix family protein, putative, expressed
LOC_Os04g23910.1	0	2.24217	67.4178	47.0484	0.0195881	0.00113367	OsMADS25 - MADS-box family gene with MIKCc type-box, expressed
LOC_Os04g24110.1	452.823	522.426	23.6554	30.5814	17.9813	4.42e-05	anthocyanin 3-O-beta-glucosyltransferase, putative, expressed
LOC_Os04g24850.1	17.2687	25.785	0	2.35242	18.3019	0.0239672	cytokinin-O-glucosyltransferase 2, putative, expressed
LOC_Os04g25060.1	160.215	238.791	1769.42	1931.34	0.107817	0.000860369	cysteine-rich receptor-like protein kinase, putative, expressed
LOC_Os04g25370.1	259.03	274.666	7.09661	9.40967	32.3329	1.36e-05	cytokinin-O-glucosyltransferase 2, putative, expressed
LOC_Os04g25380.1	56.6029	58.2964	0	3.52863	32.5621	0.00478469	cytokinin-O-glucosyltransferase 2, putative, expressed
LOC_Os04g25560.1	1609.82	1913.69	111.18	135.264	14.2974	8.06e-05	OsSCP23 - Putative Serine Carboxypeptidase homologue, expressed
LOC_Os04g25650.1	176.524	208.522	1426.42	1773.72	0.120322	0.00171694	cysteine-rich receptor-like protein kinase, putative, expressed
LOC_Os04g25980.1	101.693	121.077	1.18277	0	188.347	8.13e-06	cytokinin-O-glucosyltransferase 2, putative, expressed
LOC_Os04g26320.1	450.904	400.227	93.4387	56.458	5.67812	0.0178659	mannose-binding lectin, putative, expressed
LOC_Os04g26870.1	1218.4	1239.92	101.718	92.9205	12.6302	0.000194008	oxidoreductase, aldo/keto reductase family protein, putative, expressed
LOC_Os04g27190.1	32.6186	48.2067	0	5.88104	13.7434	0.00737075	terpene synthase, putative, expressed
LOC_Os04g28260.1	1152.2	1315.03	141.932	199.956	7.21651	0.00413931	Kinesin motor domain domain containing protein, expressed
LOC_Os04g28410.1	0	1.12109	43.7625	59.9867	0.0108057	0.0011398	expressed protein
LOC_Os04g28520.1	1499.5	1430.5	2.36554	0	1238.62	6.1e-15	male sterility protein, putative, expressed
LOC_Os04g28620.1	849.044	952.922	0	0	4365	1.28e-14	male sterility protein, putative, expressed
LOC_Os04g28830.1	33.578	42.6012	3.54831	0	21.4692	0.00824634	RALFL34 - Rapid ALkalinization Factor RALF family protein precursor, putative, expressed
LOC_Os04g28990.1	1671.22	1830.73	132.47	164.669	11.7856	0.000262501	dehydrogenase, putative, expressed
LOC_Os04g29090.1	156.378	220.854	0	0	4365	1.07e-08	FAD-binding and arabino-lactone oxidase domains containing protein, putative, expressed
LOC_Os04g29210.1	194.752	298.209	1.18277	0	416.786	9.56e-09	FAD-binding and arabino-lactone oxidase domains containing protein, putative, expressed
LOC_Os04g29550.1	43.1717	33.6326	0	0	4365	9.16e-05	RIPER2 - Ripening-related family protein precursor, expressed
LOC_Os04g29920.1	514.223	470.856	2897.78	2604.13	0.179043	0.0145912	reticulon domain containing protein, putative, expressed
LOC_Os04g29960.1	12.4718	6.72651	98.1698	75.2774	0.110687	0.0136307	OsWAK43 - OsWAK receptor-like protein kinase, expressed
LOC_Os04g30010.1	37.4155	38.1169	4.73108	0	15.9652	0.00666489	OsWAK45 - OsWAK receptor-like protein kinase, expressed
LOC_Os04g30160.1	166.931	118.835	11.8277	4.70484	17.2851	0.000143915	OsWAK46 - OsWAK receptor-like protein kinase, expressed
LOC_Os04g30450.1	17.2687	21.3006	0	0	4365	0.0345338	DUF803 domain containing, putative, expressed
LOC_Os04g30720.1	374.155	464.129	52.0418	71.7487	6.77179	0.00793249	kinesin motor domain containing protein, putative, expressed
LOC_Os04g30770.1	188.037	207.401	2.36554	14.1145	23.9949	5.06e-05	glycosyl hydrolase, putative, expressed
LOC_Os04g31210.1	684.991	795.97	31.9348	51.7532	17.6962	3.73e-05	bile acid sodium symporter family protein, putative, expressed
LOC_Os04g31410.1	2461.75	3057.2	233.005	232.889	11.8459	0.000232651	RALFL37 - Rapid ALkalinization Factor RALF family protein precursor, expressed
LOC_Os04g31484.1	69.0747	134.53	1.18277	2.35242	57.5938	2.26e-05	RALFL20 - Rapid ALkalinization Factor RALF family protein precursor, expressed
LOC_Os04g31710.1	100.734	21.3006	0	2.35242	51.8762	0.000631058	expressed protein
LOC_Os04g31790.1	53.7248	48.2067	987.612	788.06	0.0574044	2.65e-05	expressed protein
LOC_Os04g32010.1	265.746	345.294	65.0523	49.4008	5.33878	0.0359968	thiamine pyrophosphate enzyme, C-terminal TPP binding domain containing protein, expressed
LOC_Os04g32110.1	777.091	798.213	3609.81	3689.77	0.215807	0.0330046	ACT domain containing protein, expressed
LOC_Os04g32480.1	42.2123	71.7495	3.54831	4.70484	13.8083	0.00636694	zinc-finger protein, putative, expressed
LOC_Os04g32510.1	59.481	71.7495	3.54831	9.40967	10.1274	0.0119249	expressed protein
LOC_Os04g32740.1	61.3998	61.6597	529.88	570.461	0.111837	0.0019896	hydrolase, NUDIX family, domain containing protein, expressed
LOC_Os04g32850.1	3234.04	2948.45	615.04	329.339	6.54663	0.00594841	basic proline-rich protein, putative, expressed
LOC_Os04g32860.1	86.3434	104.261	1.18277	0	161.151	1.37e-05	expressed protein
LOC_Os04g33110.1	468.173	479.824	1477.28	2662.94	0.228973	0.0438276	expressed protein
LOC_Os04g33115.1	3.83748	0	210.533	281.114	0.00780537	2.71e-08	expressed protein
LOC_Os04g33190.1	4426.54	3469.76	23578.5	20404.9	0.179529	0.0141618	AMP-binding enzyme, putative, expressed
LOC_Os04g33240.1	168.849	173.768	33.1175	27.0528	5.69413	0.0363443	sex determination protein tasselseed-2, putative, expressed
LOC_Os04g33450.1	1191.54	1284.76	144.298	145.85	8.53463	0.0017596	expressed protein
LOC_Os04g33450.2	319.471	340.81	31.9348	42.3435	8.88928	0.00295728	expressed protein
LOC_Os04g33560.1	142.946	186.1	1.18277	14.1145	21.5101	5.68e-05	expressed protein
LOC_Os04g33590.2	0.959371	2.24217	47.3108	49.4008	0.033104	0.00729246	hydrolase, alpha/beta fold family protein, putative, expressed
LOC_Os04g33610.1	317.552	282.513	3413.47	3540.39	0.0862924	0.000245541	expressed protein
LOC_Os04g33670.1	115.125	177.131	18.9243	28.229	6.19799	0.0226346	expressed protein
LOC_Os04g33680.1	331.942	623.323	21.2898	16.4669	25.3005	6.39e-06	glutaredoxin, putative, expressed
LOC_Os04g33870.1	29.7405	75.1127	2.36554	4.70484	14.8299	0.00529526	DUF623 domain containing protein, expressed
LOC_Os04g34080.1	365.52	196.19	1403.95	1385.57	0.201364	0.0292735	WD-40 repeat family protein, putative, expressed
LOC_Os04g34250.1	130.474	134.53	0	0	4365	3.03e-07	serine/threonine-protein kinase receptor precursor, putative, expressed
LOC_Os04g34580.1	23.9843	41.4802	0	0	4365	0.00416997	FAD binding domain containing protein, expressed
LOC_Os04g34600.1	2343.74	2997.78	4.73108	7.05725	453.12	2.96e-14	abscisic stress-ripening, putative, expressed
LOC_Os04g34630.1	39.3342	0	0	0	4365	0.00715284	peroxidase precursor, putative, expressed
LOC_Os04g35100.1	381.83	306.056	40.2141	44.6959	8.10135	0.00395857	phospholipase C, putative, expressed
LOC_Os04g35130.1	585.216	516.82	2881.23	2621.77	0.200261	0.0245371	expressed protein
LOC_Os04g35270.1	24.9437	29.1482	361.927	330.515	0.0781175	0.000444525	alpha-1,4-fucosyltransferase, putative, expressed
LOC_Os04g35280.1	257.111	284.756	16.5588	19.9956	14.8236	0.000248507	neutral/alkaline invertase, putative, expressed
LOC_Os04g35370.1	31.6593	20.1795	0	0	4365	0.0188827	MBTB5 - Bric-a-Brac, Tramtrack, Broad Complex BTB domain with Meprin and TRAF Homology MATH domain, expressed
LOC_Os04g35430.1	128.556	271.303	8.27938	10.5859	21.1955	5.68e-05	PHD-finger domain containing protein, expressed
LOC_Os04g35580.1	159.256	253.365	24.8381	29.4052	7.60684	0.0101163	expressed protein
LOC_Os04g35840.1	4228.91	3896.89	855.142	664.558	5.34698	0.0166322	T-complex protein 11, putative, expressed
LOC_Os04g35864.1	128.556	106.503	0	11.7621	19.9844	0.000702519	DDT domain-containing protein, putative, expressed
LOC_Os04g35880.1	212.021	210.764	10.6449	24.7004	11.9616	0.00138689	retrotransposon protein, putative, unclassified, expressed
LOC_Os04g35890.1	118.003	192.827	2.36554	0	131.399	2.14e-07	TKL_IRAK_CR4L.3 - The CR4L subfamily has homology with Crinkly4, expressed
LOC_Os04g36070.1	241.762	319.509	29.5692	47.0484	7.32561	0.00647197	OsRR1 type-A response regulator, expressed
LOC_Os04g36630.1	154.459	114.351	759.338	697.492	0.184517	0.0201985	expressed protein
LOC_Os04g36740.1	72.9122	75.1127	5.91384	2.35242	17.9071	0.00485068	potassium channel SKOR, putative, expressed
LOC_Os04g37500.1	1244.3	1273.55	107.632	131.735	10.5188	0.000534778	glutamate decarboxylase, putative, expressed
LOC_Os04g37550.1	762.7	911.442	30.752	30.5814	27.2958	2.18e-06	aspartic proteinase nepenthesin-2 precursor, putative, expressed
LOC_Os04g37670.1	362.642	350.9	62.6868	52.9294	6.17165	0.0156023	steroid nuclear receptor, ligand-binding, putative, expressed
LOC_Os04g37680.1	75.7903	66.144	5.91384	5.88104	12.0335	0.00748483	alpha/beta hydrolase fold, putative, expressed
LOC_Os04g37770.1	1182.9	1252.25	3294.01	7927.65	0.217005	0.0332146	transposon protein, putative, CACTA, En/Spm sub-class, expressed
LOC_Os04g38026.1	420.205	544.847	67.4178	90.5681	6.10847	0.0131069	transporter family protein, putative, expressed
LOC_Os04g38220.1	541.085	664.804	2.36554	4.70484	170.555	2.76e-10	transporter family protein, putative, expressed
LOC_Os04g38390.1	1774.84	2284.77	431.711	390.501	4.93742	0.0266924	wound/stress protein, putative, expressed
LOC_Os04g38740.1	214.899	252.244	14.1932	21.1718	13.2092	0.000376082	MYB family transcription factor, putative, expressed
LOC_Os04g38810.1	419.245	761.217	27.2037	24.7004	22.7431	9.4e-06	formin, putative, expressed
LOC_Os04g38830.1	1.91874	5.60543	24.8381	61.1629	0.0874893	0.0304373	transposon protein, putative, unclassified, expressed
LOC_Os04g38910.1	519.02	565.027	4396.35	4840.1	0.117366	0.00140534	atypical receptor-like kinase MARK, putative, expressed
LOC_Os04g39030.1	69.0747	52.691	5.91384	2.35242	14.7304	0.00969398	peptide transporter PTR2, putative, expressed
LOC_Os04g39150.1	13586.6	16215.4	1965.76	1410.27	8.82751	0.00110334	pathogenesis-related Bet v I family protein, putative, expressed
LOC_Os04g39160.1	241.762	355.384	13.0105	8.23346	28.109	8.21e-06	RNA-dependent RNA polymerase, putative, expressed
LOC_Os04g39180.1	24.9437	25.785	0	0	4365	0.0053653	nodulation receptor kinase precursor, putative, expressed
LOC_Os04g39210.1	1212.65	1308.31	219.995	265.823	5.18908	0.0218338	agmatine deiminase, putative, expressed
LOC_Os04g39320.1	132.393	118.835	14.1932	7.05725	11.8222	0.000787151	expressed protein
LOC_Os04g39320.2	16.3093	19.0584	1.18277	0	29.9025	0.013823	expressed protein
LOC_Os04g39370.1	38.3748	14.5741	593.75	608.1	0.0440562	1.45e-05	heavy metal associated domain containing protein, expressed
LOC_Os04g39570.1	44.1311	63.9019	7.09661	1.17621	13.0588	0.0139397	WRKY35, expressed
LOC_Os04g39650.1	47.9686	79.597	9.46215	1.17621	11.9911	0.0107881	receptor protein kinase CLAVATA1 precursor, putative, expressed
LOC_Os04g40410.1	58.5216	32.5115	512.139	546.937	0.0859552	0.000489978	high affinity nitrate transporter, putative, expressed
LOC_Os04g40530.1	31.6593	32.5115	0	1.17621	54.5572	0.000554076	methyltransferase domain containing protein, expressed
LOC_Os04g40560.1	70.9935	71.7495	494.397	682.201	0.121318	0.00249474	WD domain, G-beta repeat domain containing protein, expressed
LOC_Os04g40580.1	6.7156	11.2109	262.575	274.057	0.0334055	6.35e-06	O-acyltransferase, putative, expressed
LOC_Os04g40940.1	462.417	792.607	95.8043	124.678	5.69217	0.0165579	mitotic spindle checkpoint protein MAD2, putative, expressed
LOC_Os04g40940.2	42.2123	71.7495	4.73108	3.52863	13.7973	0.00932966	mitotic spindle checkpoint protein MAD2, putative, expressed
LOC_Os04g40980.1	379.911	391.259	2403.39	2602.95	0.154039	0.00660359	Divergent PAP2 family domain containing protein, expressed
LOC_Os04g41229.1	623.591	273.545	5001.93	5114.16	0.0886841	0.000321126	helix-loop-helix DNA-binding domain containing protein, expressed
LOC_Os04g41229.2	2.87811	0	24.8381	30.5814	0.0519332	0.0310388	helix-loop-helix DNA-binding domain containing protein, expressed
LOC_Os04g41280.1	286.852	442.829	66.2351	72.925	5.24346	0.0267511	ankyrin repeat domain containing protein, expressed
LOC_Os04g41450.1	250.396	189.463	16.5588	8.23346	17.7418	0.000194008	TGF-beta receptor, type I/II extracellular region, putative, expressed
LOC_Os04g41620.1	45.0904	45.9645	2.36554	0	38.4923	0.00783081	CHIT2 - Chitinase family protein precursor, expressed
LOC_Os04g41640.1	83.4653	91.929	0	0	4365	3.92e-06	HEV2 - Hevein family protein precursor, expressed
LOC_Os04g41680.1	9.59371	13.453	0	0	4365	0.0427689	CHIT3 - Chitinase family protein precursor, expressed
LOC_Os04g41710.1	18.2281	12.3319	0	0	4365	0.0279563	expressed protein
LOC_Os04g41810.1	4763.28	4717.53	19992.3	22202.1	0.224693	0.0387003	expressed protein
LOC_Os04g41870.1	109.368	124.44	9.46215	2.35242	19.7899	0.000227621	expressed protein
LOC_Os04g41875.1	15.3499	47.0856	1.18277	4.70484	10.6046	0.0390651	oxidoreductase, short chain dehydrogenase/reductase domain containing protein, expressed
LOC_Os04g41900.1	3623.55	4627.84	460.097	294.052	10.9413	0.000330296	expressed protein
LOC_Os04g41970.1	2580.71	1732.08	27909.8	28674.8	0.0762184	0.000111724	endoglucanase, putative, expressed
LOC_Os04g42520.1	466.254	491.035	14.1932	22.348	26.1975	3.93e-06	phosphoribosyl transferase, putative, expressed
LOC_Os04g42520.2	25.903	32.5115	0	0	4365	0.000997338	phosphoribosyl transferase, putative, expressed
LOC_Os04g42540.1	215.859	331.841	11.8277	10.5859	24.4361	1.73e-05	expressed protein
LOC_Os04g42610.1	486.401	469.735	72.1489	43.5197	8.26616	0.00296641	plant protein of unknown function DUF869 domain containing protein, expressed
LOC_Os04g42720.1	275.34	323.994	17.7415	14.1145	18.8138	6.71e-05	TMS membrane protein/tumour differentially expressed protein, putative, expressed
LOC_Os04g42860.1	4592.51	5326.28	1289.22	916.267	4.49733	0.0374891	GDSL-like lipase/acylhydrolase, putative, expressed
LOC_Os04g43060.1	83.4653	50.4488	0	2.35242	56.9262	3.1e-05	enzyme of the cupin superfamily protein, putative, expressed
LOC_Os04g43200.1	2221.9	1725.35	192.791	239.947	9.12158	0.00104441	caleosin related protein, putative, expressed
LOC_Os04g43210.1	41.253	56.0543	4.73108	2.35242	13.7372	0.0122483	transporter family protein, putative, expressed
LOC_Os04g43230.1	620.713	843.056	145.481	119.973	5.51421	0.0179544	expressed protein
LOC_Os04g43230.2	54.6842	45.9645	5.91384	4.70484	9.47845	0.0242886	expressed protein
LOC_Os04g43290.1	96.8965	135.651	7.09661	11.7621	12.3311	0.00354927	ARPC2B, putative, expressed
LOC_Os04g43390.1	427.88	373.321	5.91384	2.35242	96.9242	2.4e-08	Os4bglu16 - monolignol beta-glucoside homologue, expressed
LOC_Os04g43390.2	58.5216	57.1753	3.54831	0	32.6063	0.00394751	Os4bglu16 - monolignol beta-glucoside homologue, expressed
LOC_Os04g43560.1	826.978	660.319	48.4935	71.7487	12.3692	0.000240901	no apical meristem protein, putative, expressed
LOC_Os04g43580.1	51.806	102.019	0	0	4365	1.18e-06	DUF640 domain containing protein, putative, expressed
LOC_Os04g43650.1	1189.62	1494.41	29.5692	391.678	6.37163	0.00846346	L-allo-threonine aldolase, putative, expressed
LOC_Os04g43670.1	3344.37	5145.78	695.468	883.333	5.37759	0.0175494	expressed protein
LOC_Os04g44060.1	59.481	24.6639	0	1.17621	71.5391	0.00486535	aquaporin protein, putative, expressed
LOC_Os04g44120.1	185.159	167.042	8.27938	8.23346	21.3289	7.64e-05	collagen triple helix repeat, putative, expressed
LOC_Os04g44130.1	16.3093	24.6639	0	0	4365	0.00341307	DEF12 - Defensin and Defensin-like DEFL family, expressed
LOC_Os04g44280.1	34.5374	49.3277	0	0	4365	0.000417741	OsRR5 type-A response regulator, expressed
LOC_Os04g44300.1	171.727	163.678	17.7415	17.6431	9.47885	0.00494947	transposon protein, putative, unclassified, expressed
LOC_Os04g44320.1	1251.02	991.039	5449.02	5297.65	0.208628	0.0294028	transposon protein, putative, unclassified, expressed
LOC_Os04g44354.1	255.193	232.065	1258.47	1211.5	0.197273	0.0244024	UDP-glucoronosyl and UDP-glucosyl transferase domain containing protein, expressed
LOC_Os04g44354.3	10.5531	5.60543	67.4178	54.1056	0.132966	0.0369359	UDP-glucoronosyl and UDP-glucosyl transferase domain containing protein, expressed
LOC_Os04g44410.1	371.277	634.534	34.3003	54.1056	11.3772	0.000489978	OsSCP25 - Putative Serine Carboxypeptidase homologue, expressed
LOC_Os04g44440.1	103.612	147.983	16.5588	8.23346	10.1482	0.00427951	TCP family transcription factor, putative, expressed
LOC_Os04g44460.1	57.5623	85.2025	0	0	4365	2.41e-05	sulfotransferase domain containing protein, expressed
LOC_Os04g44500.1	970.884	698.436	4094.75	4447.25	0.195425	0.0226106	GEM, putative, expressed
LOC_Os04g44510.1	3212.93	2508.99	11700	13604	0.226127	0.0416348	GEM, putative, expressed
LOC_Os04g44640.1	400.058	545.968	24.8381	21.1718	20.5614	2.07e-05	ulp1 protease family, C-terminal catalytic domain containing protein, expressed
LOC_Os04g44670.1	45.0904	23.5428	266.123	301.11	0.120997	0.00587837	AP2 domain containing protein, expressed
LOC_Os04g44780.1	378.952	571.753	74.5144	67.0439	6.71599	0.00820949	beta-expansin precursor, putative, expressed
LOC_Os04g44900.1	729.122	810.545	3457.23	4023.81	0.205809	0.0262063	lectin-like receptor kinase, putative, expressed
LOC_Os04g44950.1	1601.19	1477.59	183.329	174.079	8.61419	0.00156585	short-chain dehydrogenase/reductase, putative, expressed
LOC_Os04g44980.1	117.043	139.015	8.27938	19.9956	9.056	0.00926856	short-chain dehydrogenase/reductase, putative, expressed
LOC_Os04g45000.1	440.351	655.835	4.73108	0	231.699	1.5e-10	short-chain dehydrogenase/reductase, putative, expressed
LOC_Os04g45000.2	93.059	122.198	0	0	4365	8.45e-07	short-chain dehydrogenase/reductase, putative, expressed
LOC_Os04g45070.1	10638.5	8399.17	45355.6	46054.5	0.208266	0.0284099	remorin, putative, expressed
LOC_Os04g45090.1	727.203	688.346	178.598	136.44	4.49326	0.0432645	cytochrome b561, putative, expressed
LOC_Os04g45090.2	587.135	869.962	164.405	132.912	4.90083	0.0319285	cytochrome b561, putative, expressed
LOC_Os04g45130.1	128.556	105.382	9.46215	16.4669	9.02222	0.00860117	heavy-metal-associated domain-containing protein, putative, expressed
LOC_Os04g45140.1	534.37	581.843	26.0209	44.6959	15.7843	7.46e-05	DTA2, putative, expressed
LOC_Os04g45330.1	374.155	640.14	50.8591	51.7532	9.88473	0.000927334	YABBY domain containing protein, putative, expressed
LOC_Os04g45370.1	154.459	133.409	18.9243	30.5814	5.81484	0.0389774	OsSAUR19 - Auxin-responsive SAUR gene family member, expressed
LOC_Os04g45510.1	5.75623	0	352.465	264.647	0.00932768	7.15e-08	expressed protein
LOC_Os04g45520.1	2.87811	13.453	82.7938	52.9294	0.120327	0.048474	integral membrane protein, putative, expressed
LOC_Os04g45720.1	1223.2	1662.57	193.974	177.608	7.76617	0.00286672	aldehyde dehydrogenase, putative, expressed
LOC_Os04g45860.1	264.786	256.729	49.6763	41.1673	5.7408	0.0201459	transposon protein, putative, unclassified, expressed
LOC_Os04g45970.1	1761.41	1589.7	139.567	175.255	10.6444	0.000462273	glutamate dehydrogenase protein, putative, expressed
LOC_Os04g45970.2	199.549	154.71	26.0209	15.2907	8.57528	0.00795548	glutamate dehydrogenase protein, putative, expressed
LOC_Os04g45990.1	1045.71	1152.48	224.726	264.647	4.49185	0.042358	histone-lysine N-methyltransferase, putative, expressed
LOC_Os04g46060.1	64.2779	130.046	3.54831	4.70484	23.5454	0.0001716	WRKY36, expressed
LOC_Os04g46110.1	1361.35	1744.41	62.6868	171.727	13.2491	0.000135927	fibroin heavy chain precursor, putative, expressed
LOC_Os04g46120.1	10.5531	19.0584	0	0	4365	0.0281615	plastocyanin-like domain containing protein, putative, expressed
LOC_Os04g46130.1	875.906	862.115	0	0	4365	1.41e-14	plastocyanin-like domain containing protein, putative, expressed
LOC_Os04g46140.1	13.4312	25.785	0	0	4365	0.0294919	transferase family protein, putative, expressed
LOC_Os04g46440.1	445.148	247.76	1707.92	2359.48	0.170357	0.0129151	AP2 domain containing protein, expressed
LOC_Os04g46470.1	302.202	285.877	29.5692	24.7004	10.8362	0.00107369	carotenoid cleavage dioxygenase 7, chloroplast precursor, putative, expressed
LOC_Os04g46630.1	617.835	682.741	0	2.35242	552.868	1.69e-12	expansin precursor, putative, expressed
LOC_Os04g46740.1	1385.33	2030.29	16.5588	4.70484	160.632	1.72e-11	pectinesterase, putative, expressed
LOC_Os04g46740.2	298.364	487.672	7.09661	2.35242	83.187	2.63e-08	pectinesterase, putative, expressed
LOC_Os04g46780.1	201.468	229.822	42.5797	43.5197	5.00921	0.0434472	MSP domain containing protein, expressed
LOC_Os04g46810.1	607.282	0	49.6763	10.5859	10.0773	0.00168362	LTPL120 - Protease inhibitor/seed storage/LTP family protein precursor, expressed
LOC_Os04g46940.1	1045.71	970.86	34.3003	32.9339	29.9933	8.97e-07	copper-transporting ATPase 3, putative, expressed
LOC_Os04g46990.1	154.459	250.002	2.36554	0	170.98	6.89e-08	cis-zeatin O-glucosyltransferase, putative, expressed
LOC_Os04g47190.1	87.3028	59.4175	941.484	992.72	0.0758556	0.000157528	aminotransferase domain containing protein, putative, expressed
LOC_Os04g47190.2	6.7156	2.24217	119.46	143.497	0.0340655	4.92e-05	aminotransferase domain containing protein, putative, expressed
LOC_Os04g47360.1	230.249	278.029	2265	2759.39	0.101162	0.000650974	OsPOP9 - Putative Prolyl Oligopeptidase homologue, expressed
LOC_Os04g47420.1	148.703	178.253	2.36554	8.23346	30.8477	2.08e-05	transmembrane amino acid transporter protein, putative, expressed
LOC_Os04g47580.1	725.285	985.434	81.6111	39.9911	14.0682	0.00010723	cyclin, putative, expressed
LOC_Os04g47620.1	132.393	100.898	624.502	1080.94	0.136792	0.00487523	protein kinase APK1B, chloroplast precursor, putative, expressed
LOC_Os04g47780.1	613.998	387.895	2110.06	2378.29	0.223221	0.0426775	transmembrane amino acid transporter protein, putative, expressed
LOC_Os04g47840.1	38.3748	71.7495	0	0	4365	7.98e-05	expressed protein
LOC_Os04g47890.1	72.9122	105.382	4.73108	1.17621	30.1821	0.000286202	MYB family transcription factor, putative, expressed
LOC_Os04g48070.1	215.859	243.275	4.73108	4.70484	48.6582	2.54e-06	homeobox and START domains containing protein, putative, expressed
LOC_Os04g48170.1	132.393	53.8121	1046.75	1171.5	0.0839423	0.000377511	cytochrome P450, putative, expressed
LOC_Os04g48200.1	35697.2	30535	27.2037	19.9956	1403.25	1.52e-18	cytochrome P450, putative, expressed
LOC_Os04g48210.1	632.226	533.637	0	0	4365	5.49e-13	cytochrome P450, putative, expressed
LOC_Os04g48350.1	471.051	244.397	1469	2064.25	0.20249	0.0293262	dehydration-responsive element-binding protein, putative, expressed
LOC_Os04g48760.1	1982.06	3000.02	217.629	168.198	12.9127	0.000135481	leucine-rich repeat family protein, putative, expressed
LOC_Os04g48870.1	478.726	400.227	7.09661	0	123.855	5.53e-09	nitrilase-associated protein, putative, expressed
LOC_Os04g48930.1	40.2936	24.6639	0	0	4365	0.000997935	ferric-chelate reductase, putative, expressed
LOC_Os04g49060.1	982.396	1160.32	5446.65	5781.07	0.190842	0.01813	H-BTB3 - Bric-a-Brac, Tramtrack, Broad Complex BTB domain with H family conserved sequence, expressed
LOC_Os04g49150.1	21.1062	20.1795	92.256	152.907	0.168401	0.0318325	OsMADS17 - MADS-box family gene with MIKCc type-box, expressed
LOC_Os04g49160.1	538.207	594.175	16.5588	16.4669	34.2879	8.03e-07	zinc finger, C3HC4 type domain containing protein, expressed
LOC_Os04g49170.1	51.806	61.6597	0	0	4365	0.000157813	zinc finger, C3HC4 type domain containing protein, expressed
LOC_Os04g49210.1	103.612	95.2922	0	5.88104	33.8213	1.66e-05	naringenin,2-oxoglutarate 3-dioxygenase, putative, expressed
LOC_Os04g49620.1	556.435	682.741	42.5797	43.5197	14.3924	0.000135576	DUF581 domain containing protein, expressed
LOC_Os04g49757.1	218.737	224.217	2.36554	2.35242	93.8868	2.37e-07	purine permease, putative, expressed
LOC_Os04g49990.1	1445.77	1942.84	99.3526	92.9205	17.624	2.09e-05	AT hook motif domain containing protein, expressed
LOC_Os04g49990.2	54.6842	98.6555	2.36554	10.5859	11.8396	0.00790004	AT hook motif domain containing protein, expressed
LOC_Os04g50030.1	25.903	8.96868	0	0	4365	0.00779512	DNA binding protein, putative, expressed
LOC_Os04g50200.1	162.134	119.956	0	0	4365	7.54e-08	OsFBX151 - F-box domain containing protein, expressed
LOC_Os04g50770.1	132.393	190.584	4.73108	9.40967	22.8402	9.65e-05	MYB family transcription factor, putative, expressed
LOC_Os04g50880.1	16.3093	10.0898	4993.65	6218.62	0.00235448	1.01e-14	phosphoribulokinase/Uridine kinase family protein, expressed
LOC_Os04g50930.1	223.534	257.85	0	0	4365	1.95e-10	peptide transporter PTR2, putative, expressed
LOC_Os04g50960.1	857.678	1143.51	85.1594	102.33	10.6736	0.000521273	expressed protein
LOC_Os04g51000.1	7.67497	28.0271	0	2.35242	15.1768	0.03614	transcription factor FL, putative, expressed
LOC_Os04g51030.1	70.9935	52.691	0	0	4365	2.21e-06	wall-associated kinase 1, putative, expressed
LOC_Os04g51040.1	33.578	19.0584	293.327	365.801	0.0798577	0.000478822	OsWAK50 - OsWAK receptor-like protein kinase, expressed
LOC_Os04g51110.1	895.093	1422.66	130.105	102.33	9.97162	0.000738161	WD repeat-containing protein, putative, expressed
LOC_Os04g51110.2	169.809	233.186	15.376	17.6431	12.2049	0.000854787	WD repeat-containing protein, putative, expressed
LOC_Os04g51150.1	532.451	403.591	44.9452	48.2246	10.0466	0.00131108	transposon protein, putative, unclassified, expressed
LOC_Os04g51160.1	87.3028	86.3236	0	2.35242	73.8076	0.00012729	transposon protein, putative, unclassified, expressed
LOC_Os04g51340.1	1346	1467.5	4746.45	9935.44	0.191631	0.0183836	pectinacetylesterase domain containing protein, expressed
LOC_Os04g51400.1	1133.98	829.603	254.295	188.193	4.43758	0.0403948	zinc finger, C3HC4 type domain containing protein, expressed
LOC_Os04g51460.1	1531.16	803.818	11282.4	12610.1	0.0977281	0.000540431	glycosyl hydrolases family 16, putative, expressed
LOC_Os04g51520.1	552.598	510.094	0	0	4365	9.39e-13	glycosyl hydrolases family 16, putative, expressed
LOC_Os04g51580.1	643.738	655.835	138.384	74.1012	6.11607	0.0101136	leucine rich repeat containing protein, expressed
LOC_Os04g51610.1	2099.1	2074.01	309.885	364.625	6.18688	0.0086226	calcium-transporting ATPase, plasma membrane-type, putative, expressed
LOC_Os04g51796.1	65.2372	29.1482	4.73108	3.52863	11.4272	0.0369515	DNA repair ATPase-related, putative, expressed
LOC_Os04g51830.1	121.84	88.5657	3.54831	12.9383	12.7622	0.00286095	OsHKT1;4 - Na+ transporter, expressed
LOC_Os04g51880.1	1236.63	1225.35	5427.73	5234.13	0.230914	0.0443503	GHMP kinases ATP-binding protein, putative, expressed
LOC_Os04g51980.1	283.974	276.908	0	0	4365	2.72e-10	transferase family domain containing protein, expressed
LOC_Os04g51990.1	166.931	220.854	1.18277	1.17621	164.387	1.15e-07	transferase family domain containing protein, expressed
LOC_Os04g52110.1	149.662	26.906	9.46215	4.70484	12.4633	0.00748023	late embryogenesis abundant protein, group 3, putative, expressed
LOC_Os04g52310.1	125.678	193.948	10.6449	23.5242	9.35422	0.00524628	metal cation transporter, putative, expressed
LOC_Os04g52600.1	1661.63	1113.24	9193.66	8002.93	0.161362	0.00852033	SHR5-receptor-like kinase, putative, expressed
LOC_Os04g52614.1	626.469	504.488	2760.58	2784.09	0.203972	0.0274257	SHR5-receptor-like kinase, putative, expressed
LOC_Os04g52840.2	14.3906	1.12109	61.504	77.6298	0.111487	0.0351215	tyrosine protein kinase domain containing protein, putative, expressed
LOC_Os04g53370.1	146.784	127.804	15.376	30.5814	5.97482	0.0247369	acyltransferase, putative, expressed
LOC_Os04g53496.1	199.549	174.889	1030.19	783.355	0.206468	0.0312324	NBS-LRR disease resistance protein, putative, expressed
LOC_Os04g53560.1	85.384	31.3904	558.267	481.069	0.112355	0.00261507	expressed protein
LOC_Os04g53580.1	166.931	116.593	18.9243	30.5814	5.72708	0.0330202	P21-Rho-binding domain containing protein, putative, expressed
LOC_Os04g53710.1	33.578	2.24217	180.964	143.497	0.110399	0.0107881	plastocyanin-like domain containing protein, putative, expressed
LOC_Os04g53760.1	3318.47	3493.3	225.909	295.228	13.071	0.000115535	kinesin motor domain containing protein, putative, expressed
LOC_Os04g53760.2	106.49	106.503	7.09661	8.23346	13.8938	0.00263166	kinesin motor domain containing protein, putative, expressed
LOC_Os04g53780.1	45.0904	25.785	0	0	4365	0.000543485	leucoanthocyanidin reductase, putative, expressed
LOC_Os04g53800.1	100.734	143.499	0	0	4365	8.52e-07	leucoanthocyanidin reductase, putative, expressed
LOC_Os04g53810.1	122.8	142.378	0	0	4365	3.44e-07	leucoanthocyanidin reductase, putative, expressed
LOC_Os04g53950.1	1322.01	2429.39	33.1175	22.348	67.6349	3.14e-09	glycosyl hydrolases family 16 protein, protein, expressed
LOC_Os04g53950.2	365.52	673.772	13.0105	7.05725	51.7893	1.04e-07	glycosyl hydrolases family 16 protein, protein, expressed
LOC_Os04g53950.3	12.4718	26.906	0	0	4365	0.0276128	glycosyl hydrolases family 16 protein, protein, expressed
LOC_Os04g54210.1	45.0904	48.2067	223.543	466.955	0.135116	0.00540042	expressed protein
LOC_Os04g54220.1	14.3906	21.3006	1522.22	1879.58	0.0104918	2.89e-10	expressed protein
LOC_Os04g54230.1	115.125	177.131	1813.18	2909.94	0.0618777	2.77e-05	wound induced protein, putative, expressed
LOC_Os04g54560.1	76.7497	77.3549	16.5588	5.88104	6.86746	0.0239678	transferase family protein, putative, expressed
LOC_Os04g54810.1	10628.9	13071.9	1955.12	2234.8	5.65661	0.0128972	beta-D-xylosidase, putative, expressed
LOC_Os04g54930.1	791.481	903.595	13.0105	18.8193	53.2544	3.47e-08	ABC transporter, ATP-binding protein, putative, expressed
LOC_Os04g55120.1	165.012	210.764	5.91384	4.70484	35.3882	6.89e-06	jp18, putative, expressed
LOC_Os04g55170.1	166.931	298.209	1.18277	0	393.263	4.94e-09	LTPL126 - Protease inhibitor/seed storage/LTP family protein precursor, expressed
LOC_Os04g55570.1	1385.33	1445.08	171.501	143.497	8.98546	0.00115465	plant protein of unknown function DUF869 domain containing protein, expressed
LOC_Os04g55600.1	337.699	326.236	29.5692	23.5242	12.505	0.000356468	expressed protein
LOC_Os04g55620.1	1028.45	1078.48	140.75	147.026	7.32143	0.00379162	receptor kinase, putative, expressed
LOC_Os04g55710.1	2002.21	2821.77	154.943	232.889	12.4383	0.0001716	transposon protein, putative, unclassified, expressed
LOC_Os04g55800.1	509.426	613.234	63.8695	82.3346	7.67871	0.00386031	sulfate transporter, putative, expressed
LOC_Os04g56120.1	1.91874	0	30.752	18.8193	0.0387067	0.0318827	protein kinase domain containing protein, expressed
LOC_Os04g56170.1	252.315	295.966	2.36554	2.35242	116.212	1.77e-08	OsSPL8 - SBP-box gene family member, expressed
LOC_Os04g56240.1	9.59371	12.3319	1.18277	0	18.5376	0.0469678	lipase, putative, expressed
LOC_Os04g56430.1	1444.81	1043.73	49867.9	35398	0.0291857	1.72e-07	cysteine-rich receptor-like protein kinase, putative, expressed
LOC_Os04g56470.1	411.57	380.048	3645.29	3398.07	0.112392	0.00114736	amino acid transporter, putative, expressed
LOC_Os04g56690.1	75.7903	36.9958	857.507	924.5	0.0632916	6.79e-05	OsSAUR23 - Auxin-responsive SAUR gene family member, expressed
LOC_Os04g56850.1	292.608	321.751	21.2898	19.9956	14.8808	0.000158215	auxin response factor, putative, expressed
LOC_Os04g56920.1	0	0	15.376	14.1145	0	0.00369793	glycosyl hydrolases, putative, expressed
LOC_Os04g56930.1	27.8218	28.0271	274.402	323.457	0.0934147	0.00132072	glycosyl hydrolases, putative, expressed
LOC_Os04g56995.1	108.409	133.409	0	1.17621	205.591	1.61e-06	expressed protein
LOC_Os04g57320.1	164.052	134.53	946.215	1105.64	0.145519	0.00576333	immutans protein, putative, expressed
LOC_Os04g57400.1	1779.63	1918.18	141.932	215.246	10.3528	0.000494413	methylthioribose kinase, putative, expressed
LOC_Os04g57410.1	132.393	141.257	10.6449	10.5859	12.8893	0.00130898	methylthioribose kinase, putative, expressed
LOC_Os04g57490.1	40.2936	41.4802	0	3.52863	23.1744	0.021585	cysteine protease, putative, expressed
LOC_Os04g57530.1	2.87811	33.6326	0	0	4365	0.0271567	transcription factor, putative, expressed
LOC_Os04g58080.1	180.362	200.674	26.0209	16.4669	8.96812	0.0036061	polygalacturonase inhibitor 3 precursor, putative, expressed
LOC_Os04g58230.1	63.3185	103.14	0	3.52863	47.1737	0.000524896	transporter family protein, putative, expressed
LOC_Os04g58280.1	2411.86	2723.12	13914.1	13235.9	0.189134	0.0170769	stem-specific protein TSJT1, putative, expressed
LOC_Os04g58280.2	193.793	167.042	913.098	903.329	0.198651	0.0256107	stem-specific protein TSJT1, putative, expressed
LOC_Os04g58390.1	551.638	514.578	2532.31	2751.15	0.201803	0.0256089	allantoinase, putative, expressed
LOC_Os04g58570.1	662.926	294.845	6496.95	6222.15	0.0753018	0.00012103	C2 domain containing protein, putative, expressed
LOC_Os04g58820.1	207.224	181.616	2027.27	2160.7	0.0928471	0.000440448	ATOFP18/OFP18, putative, expressed
LOC_Os04g58910.1	3706.05	3556.08	16989.3	18126.6	0.206805	0.0267312	receptor protein kinase TMK1 precursor, putative, expressed
LOC_Os04g58920.1	649.494	434.981	4244.96	4133.2	0.129441	0.0027322	U-box domain-containing protein, putative, expressed
LOC_Os04g58960.1	721.447	926.016	153.76	151.731	5.39284	0.0199457	regulator of chromosome condensation, putative, expressed
LOC_Os04g59020.1	76.7497	54.9332	2.36554	2.35242	27.911	0.00230112	integral membrane protein, putative, expressed
LOC_Os04g59150.1	7599.18	6085.25	37438.2	39498.3	0.177867	0.0134179	peroxidase precursor, putative, expressed
LOC_Os04g59160.1	190.915	109.866	9.46215	11.7621	14.1716	0.000773403	peroxidase precursor, putative, expressed
LOC_Os04g59190.1	8475.09	2856.53	104960	111676	0.052307	1.09e-05	peroxidase precursor, putative, expressed
LOC_Os04g59260.1	1079.29	1091.94	11.8277	47.0484	36.878	2.02e-07	peroxidase precursor, putative, expressed
LOC_Os04g59540.1	480.645	293.724	2.36554	2.35242	164.132	3.79e-09	phosphatidylinositol-4-phosphate 5-Kinase, putative, expressed
LOC_Os05g01140.1	192.834	164.8	8.27938	5.88104	25.2558	3.47e-05	methyltransferase, putative, expressed
LOC_Os05g01444.1	6.7156	17.9374	2806.71	2845.25	0.00436184	6.46e-13	polygalacturonase inhibitor precursor, putative, expressed
LOC_Os05g01570.1	136.231	146.862	11.8277	4.70484	17.1234	0.000266559	auxin-induced protein 5NG4, putative, expressed
LOC_Os05g01790.1	193.793	213.006	1128.36	1631.4	0.147404	0.00578266	expressed protein
LOC_Os05g02070.2	12210.9	19169.4	39.0314	43.5197	380.132	7.64e-15	expressed protein
LOC_Os05g02070.3	1417.95	2191.72	3.54831	7.05725	340.357	2.89e-13	expressed protein
LOC_Os05g02110.1	8.63434	7.8476	81.6111	71.7487	0.107472	0.00794882	protein phosphatase 2C, putative, expressed
LOC_Os05g02240.1	165.012	206.28	35.4831	28.229	5.82765	0.0232958	ATCHX20, putative, expressed
LOC_Os05g02300.1	3484.44	4980.98	749.876	965.668	4.93454	0.0260325	Core histone H2A/H2B/H3/H4 domain containing protein, putative, expressed
LOC_Os05g02310.1	8363.8	8658.14	1026.64	1073.88	8.10367	0.00181143	soluble inorganic pyrophosphatase, putative, expressed
LOC_Os05g02350.1	27.8218	19.0584	121.825	158.788	0.167063	0.0378938	endonuclease/exonuclease/phosphatase family domain containing protein, expressed
LOC_Os05g02390.1	84.4247	94.1712	0	4.70484	37.9601	3.76e-05	ZOS5-02 - C2H2 zinc finger protein, expressed
LOC_Os05g02420.1	952.656	1093.06	124.191	85.8633	9.73899	0.000773341	expressed protein
LOC_Os05g02420.2	14.3906	13.453	1.18277	0	23.541	0.0338594	expressed protein
LOC_Os05g02530.1	8793.6	9392.45	1465.45	1343.23	6.47494	0.0062675	glutathione S-transferase, N-terminal domain containing protein, expressed
LOC_Os05g02760.1	198.59	99.7766	835.035	1297.36	0.139921	0.00532558	expressed protein
LOC_Os05g02870.1	54.6842	56.0543	4.73108	3.52863	13.4071	0.010706	white-brown complex homolog protein, putative, expressed
LOC_Os05g02890.1	1491.82	1625.57	199.888	112.916	9.96597	0.000651052	white-brown complex homolog protein 16, putative, expressed
LOC_Os05g03120.1	709.935	1199.56	15.376	24.7004	47.6464	5.95e-08	retrotransposon protein, putative, unclassified, expressed
LOC_Os05g03120.2	15.3499	40.3591	1.18277	0	47.1005	0.0107881	retrotransposon protein, putative, unclassified, expressed
LOC_Os05g03480.2	6108.32	5977.63	1385.02	1312.65	4.48014	0.0375082	acyl-coenzyme A dehydrogenase, mitochondrial precursor, putative, expressed
LOC_Os05g03640.1	22.0655	24.6639	0	0	4365	0.000551799	flavonol synthase/flavanone 3-hydroxylase, putative, expressed
LOC_Os05g03884.1	85.384	200.674	7.09661	3.52863	26.9225	2.76e-05	homeobox protein knotted-1-like 6, putative, expressed
LOC_Os05g03972.1	62.3591	81.8392	0	11.7621	12.2596	0.00820949	plant protein of unknown function domain containing protein, expressed
LOC_Os05g04020.1	90.1809	104.261	3.54831	4.70484	23.5597	0.000562144	plant protein of unknown function domain containing protein, expressed
LOC_Os05g04170.1	15444.9	12389.1	1168.58	978.606	12.9631	0.000101324	AMP-binding enzyme, putative, expressed
LOC_Os05g04170.2	691.707	501.125	33.1175	34.1101	17.7432	3.47e-05	AMP-binding enzyme, putative, expressed
LOC_Os05g04170.3	243.68	186.1	15.376	17.6431	13.0161	0.000646638	AMP-binding enzyme, putative, expressed
LOC_Os05g04410.1	1928.34	1570.64	12952.5	13008.9	0.134776	0.00312751	peroxidase precursor, putative, expressed
LOC_Os05g04440.1	399.098	94.1712	2065.11	2279.49	0.113536	0.00176653	peroxidase precursor, putative, expressed
LOC_Os05g04470.1	769.416	741.037	13015.2	16449.3	0.0512635	7.81e-06	peroxidase precursor, putative, expressed
LOC_Os05g04490.1	437.473	363.232	72.1489	79.9822	5.26326	0.0263939	peroxidase precursor, putative, expressed
LOC_Os05g04500.1	6274.29	6511.26	7.09661	3.52863	1203.32	3.05e-17	peroxidase precursor, putative, expressed
LOC_Os05g04640.1	23.9843	45.9645	3.54831	0	19.7133	0.00653865	WRKY5, expressed
LOC_Os05g04690.1	77.7091	65.0229	266.123	452.84	0.198525	0.0364875	CHIT11 - Chitinase family protein precursor, expressed
LOC_Os05g04890.1	137.19	163.678	20.1071	15.2907	8.49964	0.00773866	expressed protein
LOC_Os05g05180.1	35.4967	44.8434	377.303	318.753	0.115422	0.00263556	OsGH3.6 - Probable indole-3-acetic acid-amido synthetase, expressed
LOC_Os05g05580.1	25.903	17.9374	0	0	4365	0.00367969	expressed protein
LOC_Os05g05820.1	26.8624	75.1127	3.54831	10.5859	7.21478	0.0408702	pro-resilin precursor, putative, expressed
LOC_Os05g06110.1	2147.07	2182.75	364.293	374.034	5.86437	0.0111302	villin, putative, expressed
LOC_Os05g06140.1	1496.62	2311.68	1.18277	0	3219.81	2.97e-16	lipase, putative, expressed
LOC_Os05g06320.2	850.003	846.419	47.3108	50.577	17.3303	3.98e-05	ethylene receptor, putative, expressed
LOC_Os05g06320.3	58.5216	32.5115	3.54831	1.17621	19.2682	0.0164566	ethylene receptor, putative, expressed
LOC_Os05g06780.1	209.143	341.931	0	0	4365	2.78e-10	LTPL104 - Protease inhibitor/seed storage/LTP family protein precursor, expressed
LOC_Os05g06920.1	6424.91	8745.59	312.251	406.968	21.093	5.12e-06	relA-SpoT like protein RSH4, putative, expressed
LOC_Os05g06970.1	971.843	519.062	146.663	111.74	5.76969	0.0118167	peroxidase precursor, putative, expressed
LOC_Os05g07060.1	892.215	1024.67	2.36554	0	810.339	1.08e-13	fasciclin domain containing protein, expressed
LOC_Os05g07470.1	1.91874	4.48434	86.3421	115.268	0.0317597	0.000194008	D-mannose binding lectin family protein, expressed
LOC_Os05g07600.1	20.1468	32.5115	4.73108	0	11.1303	0.0240555	expressed protein
LOC_Os05g07710.1	78.6684	59.4175	13.0105	4.70484	7.79473	0.037952	WD40-like domain containing protein, putative, expressed
LOC_Os05g08010.1	69.0747	109.866	8.27938	21.1718	6.07586	0.0377129	OsFBX161 - F-box domain containing protein, expressed
LOC_Os05g08360.1	2080.88	2626.7	573.643	517.532	4.31423	0.047772	rRNA 2-O-methyltransferase fibrillarin 2, putative, expressed
LOC_Os05g08430.1	21.1062	15.6952	0	0	4365	0.0429632	boron transporter protein, putative, expressed
LOC_Os05g08490.1	5.75623	1.12109	76.88	78.806	0.0441743	0.00103593	cytokinin-O-glucosyltransferase 1, putative, expressed
LOC_Os05g08510.1	7.67497	11.2109	76.88	81.1584	0.119501	0.0193596	glucosyltransferase, putative
LOC_Os05g08530.1	60.4404	107.624	4.73108	2.35242	23.7262	0.000253411	phototropic-responsive NPH3 family protein, putative, expressed
LOC_Os05g08920.1	127.596	188.342	20.1071	18.8193	8.11631	0.0121809	late embryogenesis abundant protein, putative, expressed
LOC_Os05g09440.1	425.001	419.286	4868.28	6991.39	0.0711898	6.85e-05	NADP-dependent malic enzyme, chloroplast precursor, putative, expressed
LOC_Os05g09520.1	70.0341	139.015	9.46215	3.52863	16.0921	0.00145794	IQ calmodulin-binding motif family protein, expressed
LOC_Os05g09704.1	6599.51	6335.25	1.18277	2.35242	3658.86	6.44e-19	HAD superfamily phosphatase, putative, expressed
LOC_Os05g09724.1	37.4155	48.2067	0	0	4365	0.000224856	HAD superfamily phosphatase, putative, expressed
LOC_Os05g09740.1	702.26	767.943	0	4.70484	312.488	1.79e-11	HAD superfamily phosphatase, putative, expressed
LOC_Os05g10210.1	6306.91	7594.23	2.36554	2.35242	2946.43	9.4e-19	HAD superfamily phosphatase, putative, expressed
LOC_Os05g10370.1	1426.59	2697.33	1.18277	0	3486.66	1.73e-16	acid phosphatase, putative, expressed
LOC_Os05g10620.1	179.402	133.409	719.124	759.831	0.211509	0.0373978	no apical meristem protein, putative, expressed
LOC_Os05g10620.2	26.8624	20.1795	131.287	135.264	0.176484	0.0413838	no apical meristem protein, putative, expressed
LOC_Os05g10650.1	364.561	502.246	2811.44	4722.48	0.115054	0.00119982	6-phosphofructokinase, putative, expressed
LOC_Os05g10670.1	404.855	284.756	42.5797	24.7004	10.2498	0.00101113	zinc finger CCCH type family protein, putative, expressed
LOC_Os05g10690.1	105.531	124.44	7.09661	0	32.4058	6.71e-05	Myb transcription factor, putative, expressed
LOC_Os05g10940.1	444.189	442.829	1914.9	2562.96	0.19809	0.023595	metal cation transporter, putative, expressed
LOC_Os05g11010.1	2623.88	2125.58	11423.2	14689.7	0.181882	0.0150829	harpin-induced protein 1 domain containing protein, expressed
LOC_Os05g11130.1	343.455	267.939	3431.21	3178.12	0.0925047	0.000387996	cytochrome P450, putative, expressed
LOC_Os05g11320.1	205.305	357.626	0	0	4365	5.28e-10	metallothionein-like protein 3B, putative, expressed
LOC_Os05g11414.1	102.653	108.745	1.18277	0	178.731	4.57e-06	OsMADS58 - MADS-box family gene with MIKCc type-box, expressed
LOC_Os05g11570.1	188.037	331.841	7.09661	15.2907	23.222	2.33e-05	NLI interacting factor-like phosphatase, putative, expressed
LOC_Os05g11620.1	26.8624	17.9374	0	0	4365	0.0198257	expressed protein
LOC_Os05g11900.1	1013.1	947.317	8539.59	9319.1	0.109774	0.000961901	expressed protein
LOC_Os05g11910.1	21719.2	17879.1	97552.4	110606	0.190231	0.0184454	GDSL-like lipase/acylhydrolase, putative, expressed
LOC_Os05g12040.1	14.3906	20.1795	0	0	4365	0.0425278	cytochrome P450 51, putative, expressed
LOC_Os05g12400.1	3332.86	3087.47	10.6449	5.88104	388.499	4.05e-14	BURP domain containing protein, expressed
LOC_Os05g12410.1	6194.66	7163.73	10.6449	19.9956	435.972	6.78e-15	BURP domain containing protein, expressed
LOC_Os05g12481.1	365.52	335.204	3674.86	3552.15	0.0969591	0.000498418	expressed protein
LOC_Os05g12580.1	150.621	160.315	1116.53	1966.62	0.10085	0.000718741	expressed protein
LOC_Os05g12630.1	26330.9	28852.2	76.88	91.7443	327.255	1.57e-14	expressed protein
LOC_Os05g12630.2	27.8218	39.238	0	0	4365	0.00654252	expressed protein
LOC_Os05g12640.1	54287.9	53680.9	525.149	802.175	81.3433	2.98e-10	BURP domain containing protein, expressed
LOC_Os05g12770.1	0	1.12109	22.4726	31.7576	0.0206727	0.000680791	NB-ARC domain containing protein, expressed
LOC_Os05g12808.1	47.9686	81.8392	0	0	4365	5.87e-05	DUF623 domain containing protein, expressed
LOC_Os05g13320.1	63.3185	97.5344	0	0	4365	1.6e-05	C4-dicarboxylate transporter/malic acid transport protein, expressed
LOC_Os05g13900.1	479.686	537	2.36554	3.52863	172.49	7.53e-10	retrotransposon protein, putative, unclassified, expressed
LOC_Os05g13940.1	31312	38660.6	281.499	241.123	133.888	8.99e-12	retrotransposon protein, putative, unclassified, expressed
LOC_Os05g13970.1	307.958	216.369	9326.13	11379.8	0.0253226	7.2e-08	phosphorylase domain containing protein, putative, expressed
LOC_Os05g13970.2	4.79686	0	80.4283	87.0395	0.0286435	0.000716523	phosphorylase domain containing protein, putative, expressed
LOC_Os05g14240.1	1951.36	2253.38	149.029	157.612	13.7123	9.3e-05	aquaporin protein, putative, expressed
LOC_Os05g14310.1	88.2622	144.62	4.73108	12.9383	13.18	0.00177191	expressed protein
LOC_Os05g15510.1	1745.1	2043.74	56.7729	92.9205	25.3106	2e-06	cellulase, putative, expressed
LOC_Os05g15510.2	61.3998	80.7181	1.18277	4.70484	24.1385	0.00146548	cellulase, putative, expressed
LOC_Os05g15530.1	1.91874	1.12109	223.543	415.202	0.00475906	5.18e-10	aminotransferase domain containing protein, putative, expressed
LOC_Os05g15630.1	223.534	241.033	0	0	4365	5.73e-10	membrane associated DUF588 domain containing protein, putative, expressed
LOC_Os05g15770.1	19121.2	19988.9	44.9452	58.8104	376.945	6.88e-15	glycosyl hydrolase, putative, expressed
LOC_Os05g15850.1	383.748	468.614	0	0	4365	6.61e-12	glycosyl hydrolase, putative, expressed
LOC_Os05g15880.1	0	0	222.361	422.259	0	3.76e-11	glycosyl hydrolase, putative, expressed
LOC_Os05g15920.1	0	2.24217	521.601	537.528	0.00211699	1.94e-11	glycosyl hydrolase, putative, expressed
LOC_Os05g16240.1	35.4967	78.476	0	2.35242	48.4492	0.000429016	expressed protein
LOC_Os05g16250.1	70.0341	105.382	7.09661	5.88104	13.5168	0.00379039	expressed protein
LOC_Os05g16420.1	210.102	311.662	0	0	4365	7.7e-10	SHR5-receptor-like kinase, putative, expressed
LOC_Os05g16430.1	94.9778	73.9916	0	0	4365	1.1e-05	SHR5-receptor-like kinase, putative, expressed
LOC_Os05g16640.1	630.307	794.849	69.7834	62.3391	10.7866	0.000500736	DUF630/DUF632 domains containing protein, putative, expressed
LOC_Os05g18294.1	100.734	95.2922	0	0	4365	2.42e-06	SEC14 cytosolic factor family protein, putative, expressed
LOC_Os05g18294.2	58.5216	54.9332	0	0	4365	0.00014133	SEC14 cytosolic factor family protein, putative, expressed
LOC_Os05g18604.1	122.8	150.225	0	0	4365	1.76e-07	OsSCP28 - Putative Serine Carboxypeptidase homologue, expressed
LOC_Os05g19150.1	628.388	639.019	2518.12	2966.4	0.231088	0.0462544	hydrolase, alpha/beta fold family domain containing protein, expressed
LOC_Os05g19570.1	73.8716	8.96868	1867.59	2107.77	0.0208384	5.28e-08	expansin precursor, putative, expressed
LOC_Os05g19910.1	987.193	974.223	143.115	107.035	7.84096	0.00291785	transferase family protein, putative, expressed
LOC_Os05g20020.1	50.8467	65.0229	5.91384	0	19.5929	0.00107834	polygalacturonase, putative, expressed
LOC_Os05g20100.1	222.574	225.338	30.752	51.7532	5.4289	0.028604	glycerol-3-phosphate acyltransferase, putative, expressed
LOC_Os05g24140.1	225.452	177.131	1.18277	8.23346	42.7542	6.19e-06	tetracycline transporter-like protein 1, putative, expressed
LOC_Os05g24650.1	174.606	165.921	18.9243	15.2907	9.95253	0.00359386	DUF567 domain containing protein, putative, expressed
LOC_Os05g25450.1	554.517	572.875	4690.86	4780.11	0.119036	0.00152569	TKL_IRAK_CrRLK1L-1.3 - The CrRLK1L-1 subfamily has homology to the CrRLK1L homolog, expressed
LOC_Os05g25480.1	229.29	266.818	0	0	4365	3.79e-10	OsMan06 - Endo-Beta-Mannanase, expressed
LOC_Os05g25540.1	740.635	706.284	159.674	135.264	4.90584	0.0319397	STRUBBELIG-RECEPTOR FAMILY 6 precursor, putative, expressed
LOC_Os05g25620.1	107.45	181.616	8.27938	23.5242	9.08909	0.00597449	caltractin, putative, expressed
LOC_Os05g25920.1	483.523	271.303	1804.91	2186.57	0.189109	0.0213345	expressed protein
LOC_Os05g26660.1	327.146	171.526	24.8381	30.5814	8.99811	0.00427057	NADH-ubiquinone oxidoreductase, mitochondrial precursor, putative, expressed
LOC_Os05g27090.1	47.0092	50.4488	2.36554	3.52863	16.5347	0.0082334	basic helix-loop-helix domain containing protein, expressed
LOC_Os05g27304.1	890.297	1197.32	83.9766	147.026	9.03719	0.00146523	peptide transporter PTR2, putative, expressed
LOC_Os05g27790.1	328.105	298.209	3470.24	3865.02	0.0853839	0.000235166	membrane associated DUF588 domain containing protein, putative, expressed
LOC_Os05g28040.1	15.3499	39.238	2.36554	0	23.0763	0.00981547	DUF640 domain containing protein, putative, expressed
LOC_Os05g28740.1	65.2372	72.8705	2676.61	2888.77	0.0248155	7.17e-08	universal stress protein domain containing protein, putative, expressed
LOC_Os05g28780.1	94.9778	85.2025	0	0	4365	2.57e-06	GCRP10 - Glycine and cysteine rich family protein precursor, expressed
LOC_Os05g28830.1	120.881	121.077	7.09661	4.70484	20.5024	0.000232289	PMR5, putative, expressed
LOC_Os05g29150.1	3.83748	4.48434	132.47	116.445	0.0334324	6.04e-05	expressed protein
LOC_Os05g29920.1	338.658	451.797	66.2351	70.5725	5.77786	0.0203868	expressed protein
LOC_Os05g30250.1	125.678	144.62	35.4831	2.35242	7.14402	0.0112042	Os5bglu19 - beta-glucosidase homologue, similar to G. max isohydroxyurate hydrolase, expressed
LOC_Os05g30280.1	88.2622	69.5073	9.46215	14.1145	6.69176	0.0403755	Os5bglu20 - beta-glucosidase homologue, similar to G. max isohydroxyurate hydrolase, expressed
LOC_Os05g30300.1	167.89	160.315	29.5692	12.9383	7.72111	0.0129665	Os5bglu21 - beta-glucosidase homologue, similar to G. max isohydroxyurate hydrolase, expressed
LOC_Os05g30950.1	447.067	418.165	69.7834	70.5725	6.16456	0.012963	MSP domain containing protein, putative, expressed
LOC_Os05g31140.1	3816.38	2948.45	159.674	130.559	23.3083	2.44e-06	glycosyl hydrolases family 17, putative, expressed
LOC_Os05g31140.3	21.1062	17.9374	1.18277	0	33.0103	0.0317797	glycosyl hydrolases family 17, putative, expressed
LOC_Os05g31280.1	286.852	427.133	42.5797	49.4008	7.76236	0.00427057	GASR5 - Gibberellin-regulated GASA/GAST/Snakin family protein precursor, expressed
LOC_Os05g31550.1	23.0249	7.8476	683.64	792.765	0.0209106	1.15e-07	disease resistance protein RGA4, putative, expressed
LOC_Os05g31670.1	258.071	67.2651	14.1932	38.8149	6.13747	0.0214234	AWPM-19-like membrane family protein, putative, expressed
LOC_Os05g31740.1	27.8218	34.7536	0	2.35242	26.6005	0.0238752	cytochrome P450 86A2, putative, expressed
LOC_Os05g31910.1	120.881	98.6555	0	0	4365	2.3e-07	white-brown complex homolog protein 16, putative, expressed
LOC_Os05g32150.1	5.75623	3.36326	21.2898	74.1012	0.0956011	0.00939244	expressed protein
LOC_Os05g32270.1	1472.63	1617.73	233.005	194.074	7.23602	0.00389456	AP2 domain containing protein, expressed
LOC_Os05g32530.1	1541.71	1399.11	299.241	278.762	5.08791	0.0226588	mannosylglycoprotein endo-beta-mannosidase, putative, expressed
LOC_Os05g32720.1	5.75623	1.12109	29.5692	94.0967	0.055612	0.00984803	early-responsive to dehydration protein-related, putative, expressed
LOC_Os05g32760.1	1425.63	1778.04	338.272	384.62	4.43173	0.0430789	BZIP protein, putative, expressed
LOC_Os05g32970.1	705.138	676.014	4151.52	4597.8	0.157858	0.00729246	expressed protein
LOC_Os05g33030.1	1222.24	1473.11	128.922	144.674	9.85157	0.000726117	kinesin motor domain containing protein, putative, expressed
LOC_Os05g33090.1	208.184	169.284	5.91384	1.17621	53.239	2.6e-06	expressed protein
LOC_Os05g33110.1	46.0498	40.3591	0	0	4365	0.00096662	endo-1,3;1,4-beta-D-glucanase precursor, putative, expressed
LOC_Os05g33410.1	9.59371	8.96868	312.251	455.193	0.0241873	5.67e-07	xylanase inhibitor, putative, expressed
LOC_Os05g33430.1	100.734	103.14	1821.46	2612.36	0.0459815	4.73e-06	xyloglucanase inhibitor, putative, expressed
LOC_Os05g33570.1	4326.76	3393.52	471.925	470.484	8.19208	0.00170838	pyruvate, phosphate dikinase, chloroplast precursor, putative, expressed
LOC_Os05g33570.2	32.6186	36.9958	0	1.17621	59.1854	0.0148812	pyruvate, phosphate dikinase, chloroplast precursor, putative, expressed
LOC_Os05g33630.1	1667.39	1697.32	9.46215	17.6431	124.135	6.99e-11	inosine-uridine preferring nucleoside hydrolase family protein, putative, expressed
LOC_Os05g33900.1	20.1468	36.9958	0	0	4365	0.0053653	auxin-induced protein 5NG4, putative, expressed
LOC_Os05g34010.1	621.673	849.783	150.212	175.255	4.52106	0.0440061	peptide transporter PTR2, putative, expressed
LOC_Os05g34150.1	667.722	1146.87	37.8486	56.458	19.2414	1.56e-05	glutathione S-transferase, putative, expressed
LOC_Os05g34510.1	80.5872	4.48434	3.54831	0	23.9752	0.0103754	expressed protein
LOC_Os05g34700.1	4659.67	6942.88	535.794	441.078	11.8772	0.000204366	GDSL-like lipase/acylhydrolase, putative, expressed
LOC_Os05g34780.1	232.168	291.482	31.9348	28.229	8.70374	0.00338383	retrotransposon protein, putative, Ty3-gypsy subclass, expressed
LOC_Os05g34790.1	53.7248	69.5073	2.36554	5.88104	14.9434	0.00479017	GYF domain containing protein, putative, expressed
LOC_Os05g34800.1	120.881	162.557	23.6554	25.8766	5.72233	0.0321262	expressed protein
LOC_Os05g34940.1	95.9371	126.683	506.225	583.4	0.204309	0.0313902	OsMADS4 - MADS-box family gene with MIKCc type-box, expressed
LOC_Os05g34950.1	372.236	469.735	2046.19	2104.24	0.202864	0.0249153	cysteine-rich receptor-like protein kinase 6 precursor, putative, expressed
LOC_Os05g35070.1	119.921	199.553	16.5588	11.7621	11.2805	0.00131891	DUF630/DUF632 domains containing protein, putative, expressed
LOC_Os05g35140.1	53.7248	62.7808	0	0	4365	4.01e-06	nodulin MtN3 family protein, putative, expressed
LOC_Os05g35200.2	2604.69	2117.73	57.9557	49.4008	43.9883	4.56e-08	glycosyl transferase, putative, expressed
LOC_Os05g35200.4	104.571	63.9019	2.36554	1.17621	47.5679	0.000221966	glycosyl transferase, putative, expressed
LOC_Os05g35230.1	93.059	171.526	18.9243	22.348	6.41072	0.0212421	expressed protein
LOC_Os05g35240.1	37.4155	29.1482	0	1.17621	56.5917	0.00251904	expressed protein
LOC_Os05g35460.1	4309.5	4338.6	18290.3	20048.5	0.22557	0.039259	patellin protein, putative, expressed
LOC_Os05g35570.1	681.154	597.538	50.8591	24.7004	16.923	5.15e-05	DUF803 domain containing, putative, expressed
LOC_Os05g35650.1	339.617	393.501	70.9661	74.1012	5.05364	0.0376496	peptide transporter PTR2, putative, expressed
LOC_Os05g35690.1	0	0	33.1175	30.5814	0	0.00248196	GASR6 - Gibberellin-regulated GASA/GAST/Snakin family protein precursor, expressed
LOC_Os05g35730.1	448.986	526.91	59.1384	62.3391	8.03355	0.00397866	hydrolase, alpha/beta fold family domain containing protein, expressed
LOC_Os05g36900.1	39.3342	65.0229	0	1.17621	88.7233	0.00035079	dof zinc finger domain containing protein, putative, expressed
LOC_Os05g37130.1	498.873	528.031	1.18277	3.52863	217.962	1.58e-10	glycosyl hydrolases family 17, putative, expressed
LOC_Os05g37130.2	36.4561	26.906	0	0	4365	0.00130666	glycosyl hydrolases family 17, putative, expressed
LOC_Os05g37250.1	840.409	640.14	3467.88	3762.69	0.204762	0.0274635	cytochrome P450, putative, expressed
LOC_Os05g37470.1	124.718	146.862	20.1071	11.7621	8.52173	0.00653607	transmembrane amino acid transporter protein, putative, expressed
LOC_Os05g37600.1	614.957	780.275	113.546	103.506	6.4281	0.00858652	glycerol-3-phosphate acyltransferase, putative, expressed
LOC_Os05g37780.1	45.0904	45.9645	1108.25	1099.76	0.0412385	2.71e-06	expressed protein
LOC_Os05g38000.1	2874.28	3210.79	136.018	176.431	19.4753	8.66e-06	ATROPGEF7/ROPGEF7, putative, expressed
LOC_Os05g38020.1	4.79686	4.48434	48.4935	50.577	0.0936827	0.0388265	expressed protein
LOC_Os05g38290.1	165.971	182.737	4.73108	7.05725	29.5808	5.78e-05	protein phosphatase 2C, putative, expressed
LOC_Os05g38410.1	2175.85	2263.47	102.901	127.031	19.3072	1.05e-05	laccase precursor protein, putative, expressed
LOC_Os05g38420.1	461.458	423.77	18.9243	25.8766	19.7592	2.85e-05	laccase precursor protein, putative, expressed
LOC_Os05g38480.1	591.932	946.196	75.6972	88.2157	9.38381	0.00116138	kinesin motor domain containing protein, putative, expressed
LOC_Os05g38590.1	138.149	105.382	15.376	21.1718	6.66338	0.0180897	expressed protein
LOC_Os05g39120.1	105.531	146.862	8.27938	8.23346	15.2846	0.000549366	expressed protein
LOC_Os05g39140.1	57.5623	44.8434	236.554	261.118	0.205769	0.0481108	expressed protein
LOC_Os05g39250.1	130.474	70.6284	4.73108	7.05725	17.0595	0.0021379	phosphatidylethanolamine-binding protein, putative, expressed
LOC_Os05g39300.1	0	1.12109	33.1175	25.8766	0.0190033	0.00224808	OsFBL24 - F-box domain and LRR containing protein, expressed
LOC_Os05g39310.1	246.558	179.374	58535.2	56213.4	0.00371187	6.23e-14	thiamine pyrophosphate enzyme, C-terminal TPP binding domain containing protein, expressed
LOC_Os05g39320.1	79.6278	80.7181	1633.4	1761.96	0.047225	5.36e-06	thiamine pyrophosphate enzyme, C-terminal TPP binding domain containing protein, expressed
LOC_Os05g39350.1	1865.98	1635.66	8232.07	8449.89	0.209906	0.0294784	PMR5, putative, expressed
[truncated: 1,720 more rows]

## Sheet: DETs-Se+Sub vs NP+Sub
Table S2-B: List of differentially expressed genes in Se+Sub compared with NP+Sub. Genes with significantly increased and decreased expression (Fold change > |2|, FDR<0.05) are given.
Gene ID	NP+Sub-R1_CDPV	NP+Sub-R2_CDPV	Se+Sub-R1_CDPV	Se+Sub-R1_CDPV	Fold Change	FDR	Description
LOC_Os01g01360.1	75.6972	52.9294	383.654	653.587	8.06397	0.00488302	peptide transporter PTR2, putative, expressed
LOC_Os01g01430.1	0	0	30.9676	27.8313	6599	0.00270976	No apical meristem protein, putative, expressed
LOC_Os01g01560.1	105.266	138.793	11.1827	19.7513	0.126748	0.0289061	transposon protein, putative, unclassified, expressed
LOC_Os01g01660.1	0	0	23.2257	28.7291	6599	0.000616944	isoflavone reductase, putative, expressed
LOC_Os01g01890.1	55.5901	25.8766	380.213	546.751	11.3784	0.000766603	expressed protein
LOC_Os01g01940.1	4.73108	3.52863	57.6341	79.9028	16.6516	0.00521059	expressed protein
LOC_Os01g02010.1	7.09661	14.1145	427.525	471.337	42.3769	5.91e-07	expressed protein
LOC_Os01g02050.1	696.651	685.73	49.032	43.0937	0.0666428	0.000191479	phosphoenolpyruvate carboxylase, putative, expressed
LOC_Os01g02930.1	17642.2	20742.4	1303.22	963.323	0.0590482	3.98e-05	glycosyltransferase protein, putative, expressed
LOC_Os01g03180.1	2.36554	2.35242	41.2901	41.2981	17.5051	0.0113287	retrotransposon protein, putative, unclassified, expressed
LOC_Os01g03230.1	0	0	6.88169	17.0579	6599	0.0388886	retrotransposon protein, putative, unclassified, expressed
LOC_Os01g03310.1	0	0	11.1827	8.97785	6599	0.0327586	BBTI1 - Bowman-Birk type bran trypsin inhibitor precursor, expressed
LOC_Os01g03330.1	2804.35	3513.34	585.804	360.012	0.149709	0.00910754	BBTI3 - Bowman-Birk type bran trypsin inhibitor precursor, expressed
LOC_Os01g03340.1	59201.1	75965.5	4716.54	3879.33	0.0635946	6.01e-05	BBTI4 - Bowman-Birk type bran trypsin inhibitor precursor, expressed
LOC_Os01g03360.1	40710.9	48528	6059.33	3343.35	0.105365	0.00128807	BBTI5 - Bowman-Birk type bran trypsin inhibitor precursor, expressed
LOC_Os01g03490.1	264.94	179.96	1886.44	2599.98	10.0841	0.000988292	heavy-metal-associated domain-containing protein, putative, expressed
LOC_Os01g03720.1	2.36554	15.2907	261.504	170.579	24.472	6.15e-05	MYB family transcription factor, putative, expressed
LOC_Os01g03730.1	812.562	793.941	95.4834	139.157	0.146056	0.00865429	nuclease PA3, putative, expressed
LOC_Os01g03914.2	0	0	14.6236	32.3202	6599	0.00719508	cation efflux family protein, putative, expressed
LOC_Os01g04050.1	747.51	915.091	85.1609	172.375	0.154899	0.0106518	BBTI12 - Bowman-Birk type bran trypsin inhibitor precursor, expressed
LOC_Os01g04170.1	36.6658	47.0484	313.977	597.924	10.893	0.00109562	expressed protein
LOC_Os01g04350.1	78.0627	55.2818	1795.26	3337.07	38.4892	2.59e-07	hsp20/alpha crystallin family protein, putative, expressed
LOC_Os01g04370.1	28.3865	39.9911	2.58063	0.897785	0.0508707	0.0178733	hsp20/alpha crystallin family protein, putative, expressed
LOC_Os01g04590.1	8.27938	7.05725	42.1503	107.734	9.77297	0.00859585	expressed protein
LOC_Os01g04950.3	2.36554	1.17621	55.0535	24.2402	22.3883	0.00840545	peptide transporter PTR2, putative, expressed
LOC_Os01g05030.1	4.73108	2.35242	34.4084	60.1516	13.3493	0.0202315	transposon protein, putative, unclassified, expressed
LOC_Os01g05560.1	87.5249	43.5197	9.46232	5.38671	0.113313	0.041009	expressed protein
LOC_Os01g06150.1	1104.71	1272.66	31.8278	69.1294	0.042466	9.41e-06	expressed protein
LOC_Os01g06560.1	9787.41	12430.2	81.72	87.9829	0.00763822	5.26e-11	transcription factor HBP-1b, putative, expressed
LOC_Os01g06560.2	20.1071	38.8149	0	0	0	0.00798081	transcription factor HBP-1b, putative, expressed
LOC_Os01g06640.1	17.7415	4.70484	123.01	97.8585	9.83984	0.00890772	basic helix-loop-helix, putative, expressed
LOC_Os01g07150.1	830.304	848.047	16.344	16.1601	0.0193667	1.51e-07	expressed protein
LOC_Os01g07250.1	635.147	681.025	83.4405	99.6541	0.139111	0.00759805	saposin-like type B, region 1 family protein, putative, expressed
LOC_Os01g07480.1	3.54831	5.88104	85.1609	133.77	23.218	0.000276122	DUF260 domain containing protein, putative, expressed
LOC_Os01g07530.1	40.2141	41.1673	784.512	1194.95	24.3233	7.7e-06	uncharacterized glycosyltransferase, putative, expressed
LOC_Os01g07850.1	11.8277	21.1718	110.107	163.397	8.28813	0.00714174	glyoxalase family protein, putative, expressed
LOC_Os01g08150.1	86.3421	54.1056	517.847	776.584	9.21646	0.00198196	expressed protein
LOC_Os01g08530.1	0	0	10.3225	33.218	6599	0.00300183	retrotransposon protein, putative, unclassified, expressed
LOC_Os01g08700.1	7485.74	7080.78	267.526	1084.52	0.0928189	0.000576021	GIGANTEA, putative, expressed
LOC_Os01g08700.5	57.9557	39.9911	1.72042	2.69335	0.045063	0.00296714	GIGANTEA, putative, expressed
LOC_Os01g08700.8	199.888	170.55	0.860211	7.18228	0.0217107	2.02e-06	GIGANTEA, putative, expressed
LOC_Os01g08810.1	0	1.17621	75.6986	54.7649	110.919	5.76e-05	cytochrome P450, putative, expressed
LOC_Os01g09450.1	173.867	155.26	785.373	950.754	5.27495	0.0308278	OsIAA2 - Auxin-responsive Aux/IAA gene family member, expressed
LOC_Os01g09470.1	8.27938	11.7621	90.3222	157.112	12.3461	0.00254227	IQ calmodulin-binding motif family protein, expressed
LOC_Os01g09490.1	425.797	374.034	55.9137	29.6269	0.106948	0.00384425	transposon protein, putative, unclassified, expressed
LOC_Os01g09540.1	10.6449	4.70484	87.7415	96.9607	12.0329	0.00163792	HAD superfamily phosphatase, putative, expressed
LOC_Os01g09580.1	43.7625	59.9867	249.461	457.87	6.81771	0.0107656	CAMK_CAMK_like_Aur_like.1 - CAMK includes calcium/calmodulin depedent protein kinases, expressed
LOC_Os01g09580.2	10.6449	2.35242	52.4729	69.1294	9.35594	0.0140588	CAMK_CAMK_like_Aur_like.1 - CAMK includes calcium/calmodulin depedent protein kinases, expressed
LOC_Os01g09590.1	14.1932	1.17621	224.515	118.508	22.3185	0.000124432	myb-like DNA-binding domain containing protein, putative, expressed
LOC_Os01g10140.2	3.54831	10.5859	36.9891	67.3338	7.38089	0.0431439	RNA-dependent RNA polymerase, putative, expressed
LOC_Os01g10210.1	173.867	237.594	5007.29	2945.63	19.3285	1.95e-05	lachrymatory factor synthase, putative, expressed
LOC_Os01g10320.1	14.1932	21.1718	113.548	192.126	8.6434	0.00857409	class III HD-Zip protein 8, putative, expressed
LOC_Os01g10370.1	107.632	148.202	0	0.897785	0.00350924	1.4e-06	AP2 domain containing protein, expressed
LOC_Os01g10400.1	164.405	176.431	2445.58	2529.06	14.5954	0.000106991	expressed protein
LOC_Os01g10400.2	24.8381	43.5197	389.676	574.582	14.106	0.000236878	expressed protein
LOC_Os01g10490.1	837.4	839.813	7792.65	5740.43	8.06879	0.00311907	keratin, type I cytoskeletal 9, putative, expressed
LOC_Os01g10504.1	3.54831	2.35242	41.2901	37.707	13.3877	0.0181375	OsMADS3 - MADS-box family gene with MIKCc type-box, expressed
LOC_Os01g10980.1	0	0	148.817	121.201	6599	3.21e-07	auxin-induced protein 5NG4, putative, expressed
LOC_Os01g10990.1	0	0	35.2687	17.9557	6599	0.00103699	integral membrane protein DUF6 containing protein, expressed
LOC_Os01g11010.1	14.1932	19.9956	204.73	258.562	13.551	0.000540121	peptide-N4-asparagine amidase A, putative, expressed
LOC_Os01g11150.1	62.6868	63.5153	886.878	806.211	13.4157	0.000287811	gibberellin 2-beta-dioxygenase, putative, expressed
LOC_Os01g11270.1	132.47	127.031	7.7419	17.9557	0.0990271	0.00524187	cytochrome P450, putative, expressed
LOC_Os01g11300.1	558.267	703.373	32.688	18.8535	0.0408528	9.66e-06	cytochrome P450, putative, expressed
LOC_Os01g11340.1	10660.3	11619.8	2278.7	2459.93	0.212685	0.045176	cytochrome P450, putative, expressed
LOC_Os01g11480.1	432.893	523.413	121.29	37.707	0.166261	0.0229785	zinc finger, C3HC4 type domain containing protein, expressed
LOC_Os01g11520.1	769.983	662.206	163.44	120.303	0.198119	0.0431334	RING-H2 finger protein, putative, expressed
LOC_Os01g11730.1	68987.4	62742.5	6289.86	8520.87	0.112433	0.00176173	GDSL-like lipase/acylhydrolase, putative, expressed
LOC_Os01g11910.1	121.825	79.9822	570.32	498.27	5.2951	0.0331076	basic helix-loop-helix, putative, expressed
LOC_Os01g12190.1	9.46215	7.05725	178.924	303.451	29.2005	2.02e-05	expressed protein
LOC_Os01g12440.1	69.7834	61.1629	517.847	551.24	8.16432	0.00468597	AP2 domain containing protein, expressed
LOC_Os01g12560.1	50.8591	36.4625	355.267	292.678	7.42022	0.00922015	3-methyl-2-oxobutanoate hydroxymethyltransferase, putative, expressed
LOC_Os01g12730.1	6947.58	7938.23	1328.17	1733.62	0.205685	0.038715	ras-related protein, putative, expressed
LOC_Os01g12740.1	0	0	14.6236	44.8892	6599	0.00184038	cytochrome P450, putative, expressed
LOC_Os01g12770.1	63.8695	52.9294	664.083	654.485	11.2892	0.000800513	cytochrome P450, putative, expressed
LOC_Os01g13130.1	0	0	73.1179	60.1516	6599	3.95e-05	aquaporin protein, putative, expressed
LOC_Os01g13140.1	1.18277	0	262.364	194.819	386.537	9.32e-09	WD domain, G-beta repeat domain containing protein, expressed
LOC_Os01g13210.1	18298.6	18742.9	2306.23	3133.27	0.146849	0.00752064	salt stress root protein RS1, putative, expressed
LOC_Os01g13480.1	341.82	195.251	2375.04	1820.71	7.81228	0.0040046	glutaredoxin, putative, expressed
LOC_Os01g13560.1	3.54831	2.35242	77.419	6.28449	14.1853	0.0266029	membrane associated DUF588 domain containing protein, putative, expressed
LOC_Os01g13620.1	3.54831	2.35242	44.731	35.0136	13.5144	0.029733	retrotransposon protein, putative, unclassified, expressed
LOC_Os01g14510.1	0	9.40967	37.8493	76.3117	12.1323	0.00512203	BRASSINOSTEROID INSENSITIVE 1 precursor, putative, expressed
LOC_Os01g14520.1	0	0	23.2257	17.9557	6599	0.0120433	C4-dicarboxylate transporter/malic acid transport protein domain containing protein, expressed
LOC_Os01g14530.1	555.901	689.258	106.666	139.157	0.197423	0.0414369	AWPM-19-like membrane family protein, putative, expressed
LOC_Os01g14890.1	5.91384	2.35242	62.7954	46.6848	13.2442	0.0176555	expressed protein
LOC_Os01g15270.1	30633.7	42524.7	265604	109779	5.1311	0.0288283	expressed protein
LOC_Os01g15320.1	235.371	123.502	800.856	1036.04	5.11852	0.0354912	RALFL9 - Rapid ALkalinization Factor RALF family protein precursor, expressed
LOC_Os01g15540.1	1396.85	1566.71	223.655	291.78	0.173924	0.0195823	kinesin motor domain containing protein, putative, expressed
LOC_Os01g16146.1	35.4831	38.8149	526.449	258.562	10.5657	0.00140504	phenazine biosynthesis protein, putative, expressed
LOC_Os01g16400.1	4.73108	4.70484	31.8278	72.7205	11.0798	0.0156059	NB-ARC domain containing protein, expressed
LOC_Os01g16650.1	130.105	87.0395	717.416	1094.4	8.34384	0.00318127	ubiquitin-conjugating enzyme, putative, expressed
LOC_Os01g16770.1	0	0	16.344	31.4225	6599	0.0226546	expansin precursor, putative, expressed
LOC_Os01g16810.1	10.6449	4.70484	81.72	62.8449	9.41806	0.0206012	MYB family transcription factor, putative, expressed
LOC_Os01g16980.1	4.73108	4.70484	82.5803	110.427	20.4546	0.000812669	expressed protein
LOC_Os01g17160.1	311.068	403.44	54.1933	38.6047	0.129877	0.00906647	OsSubt1 - Putative Subtilisin homologue, expressed
LOC_Os01g17402.1	2.36554	1.17621	16.344	43.9914	17.0355	0.0143833	cyclin, putative, expressed
LOC_Os01g18080.1	2.36554	7.05725	196.128	277.415	50.2551	9.6e-07	retrotransposon protein, putative, unclassified, expressed
LOC_Os01g18220.1	1.18277	0	21.5053	25.138	39.4356	0.0142492	expressed protein
LOC_Os01g18840.1	33.1175	23.5242	203.87	142.748	6.11948	0.0356203	IF, putative, expressed
LOC_Os01g18950.1	237.737	176.431	0	0	0	4.27e-09	peroxidase precursor, putative, expressed
LOC_Os01g18970.1	363.11	308.167	13.7634	3.59114	0.025853	4.29e-06	peroxidase precursor, putative, expressed
LOC_Os01g19020.1	70594.7	72419.2	2290.74	4114.55	0.0447879	6.19e-06	peroxidase precursor, putative, expressed
LOC_Os01g19050.1	269.671	207.013	15.4838	11.6712	0.0569664	0.000274405	transposon protein, putative, unclassified, expressed
LOC_Os01g19170.1	14.1932	31.7576	666.664	597.027	27.5009	6.02e-06	polygalacturonase, putative, expressed
LOC_Os01g19390.1	2.36554	0	67.9567	54.7649	51.8789	0.000168239	glycerol-3-phosphate acyltransferase, putative, expressed
LOC_Os01g19480.1	27.2037	52.9294	332.041	425.55	9.45416	0.00244813	kelch motif family protein, putative, expressed
LOC_Os01g19694.1	4.73108	1.17621	143.655	197.513	57.7537	3.28e-06	Homeobox domain containing protein, expressed
LOC_Os01g19800.1	3658.3	4333.15	635.696	446.199	0.135381	0.00541285	zinc finger, C3HC4 type, putative, expressed
LOC_Os01g19940.1	46.128	25.8766	271.827	320.509	8.22636	0.00490388	expressed protein
LOC_Os01g19990.1	0	2.35242	30.9676	38.6047	29.5748	0.00614308	expressed protein
LOC_Os01g20830.1	3.54831	5.88104	125.591	90.6762	22.9355	0.000810911	heavy metal-associated domain containing protein, expressed
LOC_Os01g20980.1	7418.33	8264.04	805.158	482.11	0.0820837	0.000318977	pectinesterase, putative, expressed
LOC_Os01g21070.1	112.363	114.092	744.943	1281.14	8.94694	0.00236877	endoglucanase, putative, expressed
LOC_Os01g21300.1	5.91384	2.35242	46.4514	65.5383	13.5478	0.00476167	esterase/lipase/thioesterase family protein, putative, expressed
LOC_Os01g21310.1	60.3212	23.5242	223.655	351.932	6.86485	0.0113287	expressed protein
LOC_Os01g21630.1	7.09661	2.35242	23.2257	53.8671	8.1588	0.0300901	pectinacetylesterase domain containing protein, expressed
LOC_Os01g22352.1	2.36554	2.35242	376.772	477.621	181.094	1.31e-09	peroxidase precursor, putative, expressed
LOC_Os01g22380.1	3.54831	1.17621	88.6017	87.0851	37.1862	0.00021858	expressed protein
LOC_Os01g22590.1	0	0	63.6556	38.6047	6599	0.000111907	retrotransposon protein, putative, unclassified, expressed
LOC_Os01g22640.1	29.5692	27.0528	233.977	653.587	15.6753	0.000121633	GDSL-like lipase/acylhydrolase, putative, expressed
LOC_Os01g22780.1	2.36554	0	98.0641	149.93	104.836	1.27e-06	GDSL-like lipase/acylhydrolase, putative, expressed
LOC_Os01g22954.1	18.9243	17.6431	105.806	120.303	6.18335	0.0386052	serine carboxypeptidase, putative, expressed
LOC_Os01g22980.1	3.54831	2.35242	130.752	183.148	53.1969	3.15e-06	OsSCP3 - Putative Serine Carboxypeptidase homologue, expressed
LOC_Os01g23190.1	1.18277	0	47.3116	34.1158	68.8447	0.00299572	retrotransposon protein, putative, Ty3-gypsy subclass
LOC_Os01g24030.1	100.535	138.793	861.071	331.282	4.98209	0.0420638	AMP-binding enzyme, putative, expressed
LOC_Os01g24430.1	5.91384	2.35242	100.645	103.245	24.6653	0.000896241	expressed protein
LOC_Os01g24540.1	78.0627	55.2818	6.02148	2.69335	0.0653557	0.0141633	transposon protein, putative, CACTA, En/Spm sub-class, expressed
LOC_Os01g24550.1	16284.4	15734.1	1151.82	606.005	0.0549003	2.62e-05	fruit bromelain precursor, putative, expressed
LOC_Os01g24560.1	34219.9	34405.3	2492.03	1320.64	0.0555579	2.74e-05	fruit bromelain precursor, putative, expressed
LOC_Os01g24570.1	5659.55	5475.25	413.762	165.192	0.051995	2.1e-05	fruit bromelain precursor, putative, expressed
LOC_Os01g24600.1	7148.66	7113.71	416.342	276.518	0.0485796	1.27e-05	fruit bromelain precursor, putative, expressed
LOC_Os01g24700.1	33691.2	35241.6	111.827	61.9471	0.00252093	3.02e-14	expressed protein
LOC_Os01g25010.1	0	0	41.2901	99.6541	6599	5.21e-06	flavonol synthase/flavanone 3-hydroxylase, putative, expressed
LOC_Os01g25484.1	326.444	296.405	3513.96	2233.69	9.228	0.00159964	ferredoxin--nitrite reductase, putative, expressed
LOC_Os01g25484.2	24.8381	23.5242	234.838	162.499	8.21583	0.0105213	ferredoxin--nitrite reductase, putative, expressed
LOC_Os01g25820.1	22521.1	22229.2	4415.46	4929.73	0.20883	0.0412044	respiratory burst oxidase, putative, expressed
LOC_Os01g25990.2	63.8695	36.4625	305.375	276.518	5.79967	0.0237743	expressed protein
LOC_Os01g26270.1	0	0	26.6665	27.8313	6599	0.00741544	OsWAK7 - OsWAK receptor-like protein kinase, expressed
LOC_Os01g26280.1	4.73108	0	37.8493	43.0937	17.1088	0.0156238	OsWAK8 - OsWAK receptor-like protein kinase, expressed
LOC_Os01g27190.1	5.91384	2.35242	35.2687	49.3781	10.24	0.0242642	C2 domain containing protein, putative, expressed
LOC_Os01g27390.1	44.9452	42.3435	4.30106	5.38671	0.110985	0.0477531	glutathione S-transferase, putative, expressed
LOC_Os01g28500.1	0	0	64.5158	55.6626	6599	2.64e-05	SCP-like extracellular protein, expressed
LOC_Os01g28744.1	587.836	749.245	129.892	113.121	0.181749	0.0286995	retrotransposon protein, putative, unclassified, expressed
LOC_Os01g29330.1	7.09661	0	76.5588	87.9829	23.1859	0.00114892	expressed protein
LOC_Os01g31360.2	4230.76	3815.62	194.408	1015.39	0.150353	0.008217	expressed protein
LOC_Os01g31360.3	215.264	178.784	10.3225	51.1737	0.156063	0.0182769	expressed protein
LOC_Os01g31360.4	201.071	163.493	6.02148	49.3781	0.151961	0.0176555	expressed protein
LOC_Os01g32460.1	4.73108	0	241.719	118.508	76.1406	2.78e-07	expressed protein
LOC_Os01g32830.1	5.91384	2.35242	57.6341	106.836	19.8966	0.000904528	expressed protein
LOC_Os01g33040.1	87.5249	61.1629	525.589	992.95	10.2129	0.00109168	kinesin motor domain containing protein, expressed
LOC_Os01g33160.1	0	0	7.7419	21.5468	6599	0.00838108	stress responsive A/B Barrel domain containing protein, expressed
LOC_Os01g33869.1	4.73108	3.52863	94.6232	134.668	27.7602	0.000446526	expressed protein
LOC_Os01g36070.1	8156.37	8241.7	1200.85	1327.82	0.154206	0.00975834	nodulin MtN3 family protein, putative, expressed
LOC_Os01g36460.1	2.36554	12.9383	150.537	277.415	27.9637	2.18e-05	MYB family transcription factor, putative, expressed
LOC_Os01g36550.1	173.867	272.88	25.8063	8.08006	0.0758513	0.00158585	protein kinase family protein, putative, expressed
LOC_Os01g36720.1	68.6006	43.5197	3.44084	3.59114	0.0627182	0.0216337	transporter, major facilitator family, putative, expressed
LOC_Os01g37000.1	0	0	1585.37	2182.51	6599	1.85e-16	carboxyl-terminal peptidase, putative, expressed
LOC_Os01g37040.1	88.7077	95.2729	584.083	373.478	5.20469	0.039119	retrotransposon protein, putative, Ty1-copia subclass, expressed
LOC_Os01g37050.1	20.1071	4.70484	640.857	374.376	40.9172	9.68e-07	ribonuclease III domain protein, putative, expressed
LOC_Os01g37630.1	3.54831	8.23346	55.9137	93.3696	12.6707	0.00466444	esterase, putative, expressed
LOC_Os01g37650.1	2.36554	0	22.3655	37.707	25.3948	0.0187363	esterase, putative, expressed
LOC_Os01g37750.1	14.1932	7.05725	184.945	135.565	15.0825	0.00135855	glutathione S-transferase, putative, expressed
LOC_Os01g38229.1	36.6658	18.8193	1311.82	1717.46	54.5963	3.34e-08	peptidyl-prolyl isomerase, putative, expressed
LOC_Os01g38229.2	4.73108	5.88104	171.182	184.944	33.5584	1.1e-05	peptidyl-prolyl isomerase, putative, expressed
LOC_Os01g38359.1	0	7.05725	1328.17	1629.48	419.093	9.12e-13	peptidyl-prolyl cis-trans isomerase, FKBP-type, putative, expressed
LOC_Os01g38580.1	3.54831	2.35242	49.8922	78.1073	21.6922	0.00119238	beta,beta-carotene 9,10-dioxygenase, putative, expressed
LOC_Os01g38610.1	66.2351	52.9294	837.846	421.061	10.5644	0.00116319	helix-loop-helix DNA-binding domain containing protein, expressed
LOC_Os01g39000.1	8161.11	8776.87	1107.09	1510.07	0.154515	0.00973698	ZmGR2c, putative, expressed
LOC_Os01g39000.3	3114.23	2747.62	341.504	397.719	0.126107	0.00368511	ZmGR2c, putative, expressed
LOC_Os01g41050.1	0	0	49.032	6.28449	6599	0.0264154	sulfate transporter, putative, expressed
LOC_Os01g41120.1	19577.2	20876.5	1234.4	1396.05	0.0650239	6.87e-05	retrotransposon protein, putative, Ty3-gypsy subclass, expressed
LOC_Os01g41200.1	0	0	8.60211	19.7513	6599	0.0252984	heavy metal-associated domain containing protein, expressed
LOC_Os01g41240.1	6091.26	7200.75	484.299	436.323	0.0692613	0.000112697	hydrolase, alpha/beta fold family domain containing protein, expressed
LOC_Os01g41430.1	2050.92	2550.02	406.88	237.913	0.140144	0.00698765	UDP-glucoronosyl and UDP-glucosyl transferase, putative, expressed
LOC_Os01g41810.1	8.27938	1.17621	177.203	202.899	40.1987	9.24e-06	cytochrome P450 72A1, putative, expressed
LOC_Os01g42070.1	36.6658	49.4008	322.579	493.781	9.48522	0.002023	kinesin motor domain containing protein, putative, expressed
LOC_Os01g42090.1	2.36554	2.35242	84.3007	114.916	42.2253	6.97e-05	nodulin MtN3 family protein, putative, expressed
LOC_Os01g42190.1	128.922	98.8016	4.30106	2.69335	0.0307145	0.000212405	heat shock protein DnaJ, putative, expressed
LOC_Os01g42200.1	0	3.52863	38.7095	29.6269	19.3663	0.008042	expressed protein
LOC_Os01g42320.1	74.5144	12.9383	465.374	531.488	11.3989	0.000944268	aspartic proteinase nepenthesin-2 precursor, putative, expressed
LOC_Os01g42520.1	47032.8	57704.8	7890.72	9287.58	0.164013	0.0128863	expressed protein
LOC_Os01g42780.1	0	1.17621	119.569	79.005	168.826	5.18e-06	cysteine proteinase EP-B 2 precursor, putative, expressed
LOC_Os01g42860.1	2796.07	2192.45	98.9243	126.588	0.0452062	9.24e-06	inhibitor I family protein, putative, expressed
LOC_Os01g42900.1	3.54831	2.35242	147.096	162.499	52.4673	5.33e-06	ABC-2 type transporter domain containing protein, expressed
LOC_Os01g43270.1	0	0	36.9891	42.1959	6599	6.61e-05	hydroquinone glucosyltransferase, putative, expressed
LOC_Os01g43340.1	0	0	8.60211	24.2402	6599	0.0163884	retrotransposon protein, putative, unclassified, expressed
LOC_Os01g43350.1	7.09661	8.23346	92.0426	213.673	19.9422	0.000193786	protein kinase family protein, putative, expressed
LOC_Os01g43440.1	4.73108	5.88104	43.0106	57.4582	9.46736	0.0265145	TOO MANY MOUTHS precursor, putative, expressed
LOC_Os01g43460.1	0	7.05725	179.784	103.245	40.1047	3.36e-05	C4-dicarboxylate transporter/malic acid transport protein, expressed
LOC_Os01g43750.1	68.6006	109.387	8.60211	19.7513	0.159299	0.0458684	cytochrome P450 72A1, putative, expressed
LOC_Os01g43760.1	0	4.70484	94.6232	74.5161	35.9501	0.000478052	cytochrome P450 72A1, putative, expressed
LOC_Os01g44069.1	0	2.35242	374.192	921.127	550.633	9.35e-12	glycerol-3-phosphate acyltransferase, putative, expressed
LOC_Os01g44330.1	203.436	192.898	4.30106	26.0358	0.0765434	0.00129112	laccase precursor protein, putative, expressed
LOC_Os01g44960.1	9.46215	24.7004	91.1824	233.424	9.50182	0.00357576	hydrolase, alpha/beta fold family domain containing protein, expressed
LOC_Os01g44970.1	59.1384	36.4625	427.525	1018.99	15.1307	0.00014034	polygalacturonase, putative, expressed
LOC_Os01g45140.1	0	2.35242	25.8063	28.7291	23.1827	0.0210507	anthocyanin 3-O-beta-glucosyltransferase, putative, expressed
LOC_Os01g45460.1	209.35	322.281	20.6451	61.0493	0.153667	0.0177711	serine esterase, putative, expressed
LOC_Os01g45550.1	185.695	242.299	1228.38	1632.17	6.68363	0.00958652	auxin efflux carrier component, putative, expressed
LOC_Os01g45570.1	2.36554	0	36.1289	33.218	29.3155	0.00962157	homeobox associated leucine zipper, putative, expressed
LOC_Os01g45760.1	0	0	22.3655	33.218	6599	0.0034389	YUC4, putative, expressed
LOC_Os01g45900.1	15.376	16.4669	109.247	137.361	7.74451	0.0174669	OsFBX20 - F-box domain containing protein, expressed
LOC_Os01g46120.1	2.36554	0	15.4838	20.649	15.2747	0.0209137	GDSL-like lipase/acylhydrolase, putative, expressed
LOC_Os01g46660.1	66.2351	69.3963	3.44084	1.79557	0.0386077	0.00407459	transposon protein, putative, unclassified, expressed
LOC_Os01g47070.1	124.191	109.387	2108.38	2248.05	18.6508	2.89e-05	glycosyl hydrolase, putative, expressed
LOC_Os01g47270.1	35.4831	17.6431	222.795	166.09	7.32002	0.0141128	DUF1645 domain containing protein, putative, expressed
LOC_Os01g47580.1	18.9243	24.7004	253.762	193.921	10.2622	0.0041981	lipid phosphatase protein, putative, expressed
LOC_Os01g47630.1	56.7729	52.9294	342.364	476.724	7.46646	0.00840712	expressed protein
LOC_Os01g47900.1	93.4387	69.3963	496.342	337.567	5.12119	0.0441315	S-locus-like receptor protein kinase, putative, expressed
LOC_Os01g48530.1	690.737	824.523	171.182	127.485	0.197106	0.0418721	expressed protein
LOC_Os01g48570.1	0	0	26.6665	33.218	6599	0.00087128	expressed protein
LOC_Os01g48610.1	14.1932	14.1145	129.892	141.85	9.59956	0.00872294	expressed protein
LOC_Os01g49240.1	838.583	997.425	30.1074	28.7291	0.0320459	2.46e-06	limonoid UDP-glucosyltransferase, putative, expressed
LOC_Os01g49360.1	1693.73	1990.15	359.568	354.625	0.19387	0.0324214	FAD-binding and arabino-lactone oxidase domains containing protein, putative, expressed
LOC_Os01g49640.1	1.18277	0	65.376	52.9693	100.058	0.000223972	LTPL149 - Protease inhibitor/seed storage/LTP family protein precursor, expressed
LOC_Os01g49660.1	49.6763	84.687	3.44084	8.08006	0.0857444	0.018197	reticulon domain containing protein, putative, expressed
LOC_Os01g50160.1	10034.6	11299.8	1058.92	1007.31	0.0968496	0.000801518	MDR-like ABC transporter, putative, expressed
LOC_Os01g50410.1	3176.92	4462.54	610.75	535.08	0.149988	0.00900176	STE_MEKK_ste11_MAP3K.6 - STE kinases include homologs to sterile 7, sterile 11 and sterile 20 from yeast, expressed
LOC_Os01g50420.1	3217.13	4074.39	608.169	413.879	0.140169	0.00658607	STE_MEKK_ste11_MAP3K.7 - STE kinases include homologs to sterile 7, sterile 11 and sterile 20 from yeast, expressed
LOC_Os01g50440.1	656.437	1000.95	82.5803	96.0629	0.107786	0.00219957	AWPM-19-like membrane family protein, putative, expressed
LOC_Os01g50460.1	22.4726	19.9956	418.063	1077.34	35.2124	1.33e-06	nodulin MtN3 family protein, putative, expressed
LOC_Os01g50720.1	42.5797	50.577	836.125	937.287	19.0369	3.71e-05	MYB family transcription factor, putative, expressed
LOC_Os01g51980.1	9.46215	1.17621	55.9137	87.0851	13.4418	0.0022858	alliin lyase precursor, putative, expressed
LOC_Os01g52100.1	2.36554	2.35242	75.6986	151.726	48.204	2.37e-05	DUF581 domain containing protein, expressed
LOC_Os01g52130.1	5.91384	0	153.978	229.833	64.9004	7.77e-07	sulfate transporter, putative, expressed
LOC_Os01g52180.1	205.802	196.427	25.8063	20.649	0.115495	0.00974205	lipase, putative, expressed
LOC_Os01g52330.1	2.36554	0	146.236	97.8585	103.188	8.22e-06	NB-ARC domain containing protein, expressed
LOC_Os01g52680.1	1.18277	0	9.46232	25.138	29.2536	0.0373896	OsMADS32 - MADS-box family gene with MIKCc type-box, expressed
LOC_Os01g52750.1	59.1384	76.4536	1011.61	834.94	13.6184	0.000210518	OsSub3 - Putative Subtilisin homologue, expressed
LOC_Os01g52790.1	7.09661	2.35242	181.505	145.441	34.601	2.47e-05	cytochrome P450 72A1, putative, expressed
LOC_Os01g52880.1	3.54831	1.17621	198.709	175.966	79.3043	9.39e-07	leucine-rich repeat family protein, putative, expressed
LOC_Os01g53260.1	2.36554	0	49.8922	93.3696	60.5621	0.000102197	WRKY23, expressed
LOC_Os01g53750.1	182.146	198.779	2057.62	1913.18	10.4241	0.000864399	glucan endo-1,3-beta-glucosidase precursor, putative, expressed
LOC_Os01g53790.1	3276.27	3936.77	671.825	486.599	0.160601	0.0127875	stress-induced protein, putative, expressed
LOC_Os01g54210.1	74.5144	91.7443	794.835	549.444	8.08546	0.00422	GATA zinc finger domain containing protein, expressed
LOC_Os01g54230.1	89.8904	96.4491	6.02148	2.69335	0.0467685	0.00301809	expressed protein
LOC_Os01g54270.1	0	0	14.6236	45.787	6599	0.00872294	transposon protein, putative, unclassified, expressed
LOC_Os01g55100.1	152.577	152.907	2399.99	2057.72	14.5923	0.000113099	slTCP3, putative, expressed
LOC_Os01g55120.1	3.54831	0	30.1074	27.8313	16.3286	0.0386052	expressed protein
LOC_Os01g55220.1	2.36554	1.17621	76.5588	60.1516	38.5997	0.000373784	expressed protein
LOC_Os01g55500.1	320.53	381.092	1609.45	1853.03	4.93497	0.0386052	nucleobase-ascorbate transporter, putative, expressed
LOC_Os01g55600.1	0	0	20.6451	17.0579	6599	0.0146776	peptide transporter PTR2, putative, expressed
LOC_Os01g55750.1	36.6658	12.9383	1623.22	1674.37	66.4781	1.06e-08	TCP family transcription factor, putative, expressed
LOC_Os01g55750.2	5.91384	4.70484	300.214	314.225	57.8639	4.24e-07	TCP family transcription factor, putative, expressed
LOC_Os01g55750.3	4.73108	5.88104	300.214	330.385	59.4225	3.68e-07	TCP family transcription factor, putative, expressed
LOC_Os01g55820.1	2914.34	3979.12	690.749	726.308	0.205566	0.0404616	X8 domain containing protein, expressed
LOC_Os01g56020.1	26.0209	19.9956	203.01	326.794	11.5133	0.00106904	expressed protein
LOC_Os01g56570.1	987.612	1033.89	125.591	116.712	0.119863	0.00368511	xylosyltransferase, putative, expressed
LOC_Os01g57370.1	1.18277	0	18.9246	17.0579	30.4223	0.0494997	cyclic nucleotide-gated ion channel 2, putative, expressed
LOC_Os01g57890.1	0	2.35242	42.1503	68.2316	46.9228	0.0010015	Homeobox domain containing protein, expressed
LOC_Os01g58290.1	1115.35	578.695	7286.85	6132.77	7.92164	0.00340361	OsSub9 - Putative Subtilisin homologue, expressed
LOC_Os01g58890.2	190.426	176.431	40.4299	23.3424	0.173834	0.0404616	cysteine proteinase inhibitor precursor protein, putative, expressed
LOC_Os01g58910.1	0	0	10.3225	29.6269	6599	0.00149503	auxin-induced protein 5NG4, putative, expressed
LOC_Os01g59120.1	179.781	154.083	919.566	1310.77	6.68035	0.00935571	cyclin, putative, expressed
LOC_Os01g60120.1	29.5692	28.229	84.3007	235.22	5.5282	0.0410102	transmembrane protein 56, putative, expressed
LOC_Os01g60670.1	325.261	375.211	1676.55	2303.72	5.68226	0.0201413	receptor-like protein kinase precursor, putative, expressed
LOC_Os01g60740.1	1868.77	1307.94	6129	9758.02	5.00108	0.0344248	LTPL16 - Protease inhibitor/seed storage/LTP family protein precursor, expressed
LOC_Os01g60810.1	26.0209	16.4669	184.945	243.3	10.0792	0.00294186	DUF623 domain containing protein, expressed
LOC_Os01g60850.1	1.18277	4.70484	386.235	116.712	85.4247	3.57e-07	expressed protein
LOC_Os01g60930.1	50.8591	21.1718	481.718	347.443	11.5112	0.00102367	expressed protein
LOC_Os01g60940.1	0	3.52863	12.9032	35.0136	13.5794	0.0288327	expressed protein
LOC_Os01g61044.2	15.376	31.7576	299.353	96.9607	8.40831	0.0103661	transmembrane amino acid transporter protein, putative, expressed
LOC_Os01g61160.1	26.0209	22.348	644.298	860.078	31.1021	1.89e-06	laccase precursor protein, putative, expressed
LOC_Os01g61310.1	8.27938	11.7621	70.5373	90.6762	8.044	0.0285289	DUF640 domain containing protein, putative, expressed
LOC_Os01g61370.1	1.18277	0	62.7954	92.4718	131.274	1.66e-05	expressed protein
LOC_Os01g61940.1	2.36554	0	114.408	167.886	119.336	3.82e-07	white-brown complex homolog protein, putative, expressed
LOC_Os01g62010.1	1.18277	2.35242	73.1179	44.8892	33.3807	0.00267263	hydrolase, alpha/beta fold family domain containing protein, expressed
LOC_Os01g62060.1	2.36554	0	19.7849	48.4804	28.8582	0.0025504	plant-specific domain TIGR01589 family protein, expressed
LOC_Os01g62200.1	5.91384	9.40967	428.385	527	62.3476	1.25e-07	domain of unknown function DUF966 domain containing protein, expressed
LOC_Os01g62200.2	0	1.17621	29.2472	20.649	42.4212	0.0289061	domain of unknown function DUF966 domain containing protein, expressed
LOC_Os01g62260.1	133.653	239.947	5913.95	5175.73	29.6833	1.11e-06	thaumatin, putative, expressed
LOC_Os01g62430.1	1693.73	1582	314.837	289.087	0.184363	0.0266428	C2 domain containing protein, putative, expressed
LOC_Os01g62480.1	723.855	745.717	56.7739	203.797	0.177311	0.0221159	laccase precursor protein, putative, expressed
LOC_Os01g62600.1	0	1.17621	11.1827	19.7513	26.2998	0.0313984	laccase precursor protein, putative, expressed
LOC_Os01g62605.1	0	0	25.8063	8.08006	6599	0.0413089	expressed protein
LOC_Os01g62640.1	0	1.17621	23.2257	36.8092	51.041	0.0126022	zinc finger, C3HC4 type domain containing protein, expressed
LOC_Os01g62830.1	5.91384	7.05725	191.827	44.8892	18.2495	0.00125217	expressed protein
LOC_Os01g62990.1	36.6658	16.4669	206.451	224.446	8.10981	0.00689129	ATROPGEF7/ROPGEF7, putative, expressed
LOC_Os01g63190.1	354.831	157.612	1441.71	1231.76	5.21712	0.0296359	laccase precursor protein, putative, expressed
LOC_Os01g63230.1	29.5692	25.8766	213.332	213.673	7.7013	0.00937588	growth regulator related protein, putative, expressed
LOC_Os01g63310.1	92.256	115.268	479.998	562.013	5.02115	0.0431621	DUF740 domain containing protein, expressed
LOC_Os01g63540.1	0	0	56.7739	74.5161	6599	2.75e-06	cytochrome P450, putative, expressed
LOC_Os01g64410.1	0	0	24.0859	29.6269	6599	0.00133628	ATOFP18/OFP18, putative, expressed
LOC_Os01g64470.1	288.596	249.356	1252.47	1737.21	5.55752	0.0236176	harpin-induced protein 1 domain containing protein, expressed
LOC_Os01g64520.1	3761.21	3674.48	702.792	884.318	0.213445	0.0465353	uricase, putative, expressed
LOC_Os01g64590.1	1.18277	10.5859	55.0535	62.8449	10.018	0.0224183	dof zinc finger domain containing protein, putative, expressed
LOC_Os01g64660.1	3.54831	1.17621	564.298	1771.33	494.363	7.28e-13	fructose-1,6-bisphosphatase, putative, expressed
LOC_Os01g64660.2	0	0	56.7739	248.686	6599	9.04e-09	fructose-1,6-bisphosphatase, putative, expressed
LOC_Os01g64660.4	0	0	12.9032	38.6047	6599	0.0182855	fructose-1,6-bisphosphatase, putative, expressed
LOC_Os01g64670.1	0	2.35242	58.4944	273.824	141.267	1.25e-07	soluble inorganic pyrophosphatase, putative, expressed
LOC_Os01g64860.1	83.9766	88.2157	342.364	504.555	4.91845	0.045252	OsSub11 - Putative Subtilisin homologue, expressed
LOC_Os01g65110.1	65.0523	39.9911	2031.82	1448.13	33.1286	7.88e-07	POT family protein, expressed
LOC_Os01g65310.1	100.535	81.1584	453.331	440.812	4.92116	0.0472963	DUF803 domain containing, putative, expressed
LOC_Os01g65380.1	57208.2	61469.9	7858.89	8079.16	0.134297	0.00468385	patellin protein, putative, expressed
LOC_Os01g65420.1	9.46215	22.348	122.15	139.157	8.21457	0.011887	expressed protein
LOC_Os01g65670.1	1408.68	1466.73	215.913	282.802	0.173441	0.0195728	amino acid transporter, putative, expressed
LOC_Os01g65690.1	4923.87	3712.12	20598.6	20039.4	4.70567	0.0444598	4,5-DOPA dioxygenase extradiol, putative, expressed
LOC_Os01g65830.1	31510.1	38491.4	8727.7	5750.31	0.206824	0.0402571	acyl-desaturase, chloroplast precursor, putative, expressed
LOC_Os01g66010.1	50.8591	61.1629	233.977	431.834	5.94358	0.0272798	amino acid transporter, putative, expressed
LOC_Os01g66020.1	1.18277	3.52863	67.0965	100.552	35.5836	0.000349437	protein kinase family protein, putative, expressed
LOC_Os01g66490.1	59.1384	68.2201	706.233	764.015	11.5442	0.000645667	no apical meristem protein, putative, expressed
LOC_Os01g66544.1	3.54831	2.35242	108.387	29.6269	23.3892	0.00218865	expressed protein
LOC_Os01g66610.1	3.54831	7.05725	235.698	401.31	60.0635	2.8e-07	serine/threonine-protein kinase receptor precursor, putative, expressed
LOC_Os01g66710.1	0	0	17.2042	31.4225	6599	0.00121354	polygalacturonase, putative, expressed
LOC_Os01g66850.1	3.54831	16.4669	129.892	280.109	20.4844	9.73e-05	pectinacetylesterase domain containing protein, expressed
LOC_Os01g66860.2	9.46215	5.88104	192.687	358.216	35.9054	5.43e-06	serine/threonine protein kinase, putative, expressed
LOC_Os01g66890.1	2.36554	1.17621	39.5697	61.0493	28.4094	0.00180052	BTBZ1 - Bric-a-Brac, Tramtrack, and Broad Complex BTB domain with TAZ zinc finger and Calmodulin-binding domains, expressed
LOC_Os01g67010.1	6511.14	6987.86	991.823	1081.83	0.153615	0.00969389	expressed protein
LOC_Os01g67110.1	156.125	102.33	559.137	751.446	5.07082	0.0375725	expressed protein
LOC_Os01g67410.1	0	0	25.8063	30.5247	6599	0.00265775	AP2/EREBP transcription factor BABY BOOM, putative, expressed
LOC_Os01g67650.1	14.1932	10.5859	109.247	116.712	9.11892	0.0122434	gibberellin response modulator protein, putative, expressed
LOC_Os01g68050.1	1.18277	1.17621	135.913	172.375	130.687	2.53e-07	transmembrane amino acid transporter protein, putative, expressed
LOC_Os01g68300.1	4.73108	8.23346	176.343	148.134	25.0281	0.000146179	expressed protein
LOC_Os01g68460.1	7.09661	4.70484	60.2148	55.6626	9.81891	0.0477531	DC1, putative, expressed
LOC_Os01g68470.1	21.2898	9.40967	251.182	243.3	16.1071	0.000449538	expressed protein
LOC_Os01g68650.1	1116.53	1840.77	304.515	210.979	0.174312	0.0204805	plant-specific domain TIGR01615 family protein, expressed
LOC_Os01g68730.1	26.0209	19.9956	643.438	321.407	20.9674	3.86e-05	RNA-binding protein FUS, putative, expressed
LOC_Os01g68730.2	0	0	26.6665	7.18228	6599	0.047224	RNA-binding protein FUS, putative, expressed
LOC_Os01g68740.1	34.3003	8.23346	1174.19	672.441	43.4156	2.83e-07	keratin, type I cytoskeletal 9, putative, expressed
LOC_Os01g68900.1	3.54831	2.35242	114.408	192.126	51.9485	3.49e-06	zinc finger, C3HC4 type family protein, expressed
LOC_Os01g68950.1	1581.36	1664.34	10486.8	8409.55	5.82198	0.0164554	ubiquitin family domain containing protein, expressed
LOC_Os01g69030.1	35.4831	32.9339	800.856	1059.39	27.1898	4.24e-06	sucrose-phosphate synthase, putative, expressed
LOC_Os01g70260.1	39.0314	56.458	264.945	229.833	5.18149	0.0468874	receptor-like protein kinase 2 precursor, putative, expressed
LOC_Os01g70280.1	43.7625	17.6431	0.860211	0	0.0140087	0.0235383	expressed protein
LOC_Os01g70490.1	10.6449	21.1718	101.505	170.579	8.55161	0.0130911	potassium transporter, putative, expressed
LOC_Os01g70520.1	1.18277	1.17621	239.999	317.816	236.465	4.27e-09	Os1bglu5 - beta-glucosidase homologue, similar to G. max isohydroxyurate hydrolase, expressed
LOC_Os01g70550.1	4964.08	4755.41	839.566	894.193	0.17838	0.0203864	heparan-alpha-glucosaminide N-acetyltransferase, putative, expressed
LOC_Os01g70560.1	37.8486	49.4008	512.686	684.112	13.717	0.000240022	expressed protein
LOC_Os01g70830.1	0	0	8.60211	45.787	6599	0.000933171	esterase PIR7A, putative, expressed
LOC_Os01g70840.1	3.54831	5.88104	30.9676	64.6405	10.1394	0.012252	esterase, putative, expressed
LOC_Os01g70890.1	1.18277	0	61.9352	49.3781	94.1125	0.000274448	histone-like transcription factor and archaeal histone, putative, expressed
LOC_Os01g71130.1	21.2898	7.05725	473.116	152.623	22.0742	7.8e-05	xylanase inhibitor 725OS, putative, expressed
LOC_Os01g71340.1	2.36554	0	426.665	401.31	350.015	4.87e-10	glycosyl hydrolases family 17, putative, expressed
LOC_Os01g71350.1	9.46215	2.35242	481.718	310.633	67.0656	1.97e-07	glycosyl hydrolases family 17, putative, expressed
LOC_Os01g71400.1	2.36554	0	444.729	216.366	279.469	4.43e-09	glycosyl hydrolases family 17, putative, expressed
LOC_Os01g71474.1	0	0	50.7525	105.939	6599	8.43e-07	glycosyl hydrolases family 17, putative, expressed
LOC_Os01g71710.1	7.09661	1.17621	51.6127	38.6047	10.9053	0.0170262	amino acid permease family protein, putative, expressed
LOC_Os01g71780.1	18.9243	11.7621	76.5588	188.535	8.6388	0.00797832	WD domain, G-beta repeat domain containing protein, expressed
LOC_Os01g71830.1	3174.55	3222.81	658.922	626.654	0.200954	0.0364441	glycosyl hydrolases family 17, putative, expressed
LOC_Os01g72120.1	0	0	55.0535	32.3202	6599	0.000224983	glutathione S-transferase, putative, expressed
LOC_Os01g72130.1	4.73108	0	59.3546	50.2759	23.1724	0.00170181	glutathione S-transferase, putative, expressed
LOC_Os01g72170.1	3.54831	0	177.203	167.886	97.2546	1.51e-06	glutathione S-transferase, putative, expressed
LOC_Os01g72260.1	24.8381	14.1145	188.386	371.683	14.3782	0.0003677	cytochrome P450, putative, expressed
LOC_Os01g72290.1	44.9452	14.1145	1024.51	1252.41	38.5528	3.41e-07	expressed protein
LOC_Os01g72370.1	598.481	725.721	3339.34	2840.59	4.66691	0.0483924	helix-loop-helix DNA-binding domain containing protein, expressed
LOC_Os01g72420.1	89.8904	92.9205	400.858	536.875	5.12953	0.0421849	C2 domain containing protein, putative, expressed
LOC_Os01g72470.1	0	0	34.4084	33.218	6599	0.000297713	expressed protein
LOC_Os01g72490.1	157.308	142.321	1711.82	1804.55	11.7357	0.000450762	LRP1, putative, expressed
LOC_Os01g72590.1	0	1.17621	38.7095	33.218	61.152	0.00366281	expressed protein
LOC_Os01g72710.1	125.374	137.616	777.631	502.759	4.86859	0.0457549	expressed protein
LOC_Os01g72740.1	4.73108	8.23346	89.4619	63.7427	11.8172	0.00225353	cytochrome P450, putative, expressed
LOC_Os01g72760.1	0	0	20.6451	26.0358	6599	0.00200496	cytochrome P450, putative, expressed
LOC_Os01g72810.1	2589.08	3550.97	422.364	339.363	0.124059	0.00347739	secreted glycoprotein, putative, expressed
LOC_Os01g72910.1	0	0	106.666	41.2981	6599	1.66e-05	abscisic stress-ripening, putative, expressed
LOC_Os01g73110.1	121.825	99.9778	755.265	536.875	5.82562	0.0217324	expressed protein
LOC_Os01g73170.1	53.2246	85.8633	896.34	1122.23	14.5129	0.00014034	peroxidase precursor, putative, expressed
LOC_Os01g73250.1	0	0	153.118	225.344	6599	4.06e-09	abscisic stress-ripening, putative, expressed
LOC_Os01g73270.1	14.1932	21.1718	162.58	108.632	7.66894	0.017074	expressed protein
LOC_Os01g73656.1	40.2141	2.35242	0	0	0	0.012252	expressed protein
LOC_Os01g74140.1	9.46215	5.88104	53.3331	61.9471	7.51344	0.0364616	WRKY17, expressed
LOC_Os01g74146.1	56.7729	32.9339	294.192	359.114	7.28268	0.00828354	WD repeat-containing protein, putative, expressed
LOC_Os01g74152.1	561.815	544.585	61.075	98.7563	0.144461	0.00961882	haloacid dehalogenase-like hydrolase family protein, putative, expressed
LOC_Os01g74300.1	98.1698	62.3391	7485.56	6374.27	86.3493	8.24e-10	metallothionein, putative, expressed
LOC_Os01g74450.1	772.348	950.377	106.666	52.9693	0.0926645	0.000834863	aquaporin protein, putative, expressed
LOC_Os01g74540.1	66.2351	79.9822	309.676	537.773	5.79582	0.0255539	GATA zinc finger domain containing protein, expressed
LOC_Os02g01140.1	63.8695	102.33	547.094	740.672	7.74831	0.00519546	GDSL-like lipase/acylhydrolase, putative, expressed
LOC_Os02g01150.1	561.815	471.66	2457.62	2828.02	5.11444	0.0315237	erythronate-4-phosphate dehydrogenase domain containing protein, expressed
LOC_Os02g01150.2	68.6006	45.8722	270.966	312.429	5.09637	0.0431795	erythronate-4-phosphate dehydrogenase domain containing protein, expressed
LOC_Os02g01210.1	0	0	16.344	13.4668	6599	0.00961535	amino acid transporter, putative, expressed
LOC_Os02g01380.1	188.06	170.55	1235.26	1091.71	6.48885	0.0108897	expressed protein
LOC_Os02g02000.1	0	2.35242	24.0859	18.8535	18.2533	0.0250787	cytochrome P450, putative, expressed
LOC_Os02g02040.1	171.501	131.735	698.491	844.815	5.08944	0.0364	protein kinase, putative, expressed
LOC_Os02g02340.1	54.4074	50.577	987.522	864.567	17.6416	5.45e-05	glycerol-3-phosphate acyltransferase, putative, expressed
LOC_Os02g02370.1	1098.79	1156.21	34.4084	39.5025	0.0327764	2.22e-06	myb-like DNA-binding domain containing protein, putative, expressed
LOC_Os02g02400.1	10.6449	21.1718	352.687	108.632	14.4993	0.000225608	catalase isozyme A, putative, expressed
LOC_Os02g02970.1	30.752	19.9956	376.772	266.642	12.6787	0.000872012	expressed protein
LOC_Os02g03120.1	2.36554	4.70484	61.075	87.0851	20.9551	0.000952799	endoglucanase, putative, expressed
LOC_Os02g03200.1	0	3.52863	104.086	193.921	84.4541	6.64e-07	FAD-binding and arabino-lactone oxidase domains containing protein, putative, expressed
LOC_Os02g03570.1	17.7415	30.5814	255.483	152.623	8.44538	0.0067232	hsp20/alpha crystallin family protein, putative, expressed
LOC_Os02g03870.1	13003.4	14801.4	351.826	447.097	0.0287333	3.57e-07	periplasmic beta-glucosidase precursor, putative, expressed
LOC_Os02g04640.1	2.36554	4.70484	44.731	31.4225	10.7708	0.0375668	Myb-like DNA-binding domain containing protein, putative, expressed
LOC_Os02g04755.1	123.008	157.612	34.4084	4.48892	0.138612	0.0348951	transposon protein, putative, unclassified, expressed
LOC_Os02g05744.1	293.327	282.29	1082.15	1713.87	4.85743	0.0426227	endoglucanase, putative, expressed
LOC_Os02g05960.1	4.73108	1.17621	36.9891	45.787	14.0125	0.0252658	phytosulfokine receptor precursor, putative, expressed
LOC_Os02g06160.1	1.18277	0	29.2472	26.9335	47.4993	0.0201413	cysteine-rich receptor-like protein kinase 16 precursor, putative, expressed
LOC_Os02g06960.1	11.8277	18.8193	361.289	427.345	25.7328	1.46e-05	expressed protein
LOC_Os02g07030.1	2.36554	3.52863	140.214	149.032	49.0734	1.13e-05	DUF640 domain containing protein, putative, expressed
LOC_Os02g07650.1	1.18277	0	122.15	159.806	238.386	3.41e-07	zinc-binding protein, putative, expressed
LOC_Os02g08070.1	0	0	23.2257	27.8313	6599	0.00227567	OsSPL5 - SBP-box gene family member, expressed
LOC_Os02g08220.1	3124.88	3383.95	740.642	645.507	0.212964	0.0477319	expressed protein
LOC_Os02g08270.1	9.46215	5.88104	123.87	90.6762	13.9832	0.000927008	class I glutamine amidotransferase, putative, expressed
LOC_Os02g09220.1	288.596	154.083	1943.22	1332.31	7.39933	0.00554604	cytochrome P450, putative, expressed
LOC_Os02g09240.1	283.865	258.766	1069.24	1966.15	5.59384	0.0225303	cytochrome P450 71D8, putative, expressed
LOC_Os02g09250.1	43.7625	22.348	765.588	695.783	22.105	1.98e-05	cytochrome P450 71D10, putative, expressed
LOC_Os02g09270.1	18.9243	38.8149	0	1.79557	0.0310979	0.0455401	cytochrome P450 71A1, putative, expressed
LOC_Os02g10020.1	24.8381	11.7621	149.677	203.797	9.65769	0.00319686	Mad3/BUB1 homology region 1 domain containing protein, expressed
LOC_Os02g10350.1	0	2.35242	79.9996	175.068	108.428	1.77e-06	MLO domain containing protein, putative, expressed
LOC_Os02g10520.1	2392.74	2607.66	189.246	168.783	0.0716003	0.000162624	OsSub12 - Putative Subtilisin homologue, expressed
LOC_Os02g10760.1	17.7415	17.6431	307.956	502.759	22.9115	1.86e-05	AP2 domain containing protein, expressed
LOC_Os02g10800.1	60.3212	42.3435	0	0	0	0.000442598	mitochondrial carrier protein, putative, expressed
LOC_Os02g10880.1	43.7625	32.9339	344.945	187.637	6.94403	0.0142675	UDP-glucoronosyl and UDP-glucosyl transferase domain containing protein, expressed
LOC_Os02g11705.1	0	0	55.0535	32.3202	6599	0.000492289	expressed protein
LOC_Os02g11770.1	23.6554	17.6431	1271.39	1272.16	61.5894	1.98e-08	expressed protein
LOC_Os02g12680.1	0	0	58.4944	42.1959	6599	0.000467297	cytochrome P450, putative, expressed
LOC_Os02g12790.1	8.27938	9.40967	127.311	228.935	20.1394	0.000122569	GATA zinc finger domain containing protein, expressed
LOC_Os02g12820.1	0	2.35242	43.0106	20.649	27.0613	0.0474768	helix-loop-helix DNA-binding domain containing protein, expressed
LOC_Os02g13060.1	566.546	477.541	5495.03	2683.48	7.83316	0.0036255	expressed protein
LOC_Os02g13260.1	341.82	359.92	30.9676	61.0493	0.131127	0.00969389	F-box family protein, putative, expressed
LOC_Os02g13510.1	1094.06	717.487	5170.73	3965.51	5.04333	0.0327343	receptor-like protein kinase 5 precursor, putative, expressed
LOC_Os02g13660.1	85787.4	77364	6457.6	11041	0.107254	0.00133628	meiosis 5, putative, expressed
LOC_Os02g13870.1	2519.3	1873.7	8990.93	12214.4	4.82706	0.0402796	aquaporin protein, putative, expressed
LOC_Os02g14180.1	247.199	418.73	37.8493	26.9335	0.0972819	0.00299572	peroxidase precursor, putative, expressed
LOC_Os02g14190.1	23.6554	12.9383	269.246	321.407	16.1408	0.000241419	spermidine synthase, putative, expressed
LOC_Os02g14490.1	15.376	4.70484	201.289	211.877	20.5752	0.000110362	MYB family transcription factor, putative, expressed
LOC_Os02g14990.1	1.18277	5.88104	65.376	54.7649	17.0079	0.0101532	zinc finger, C3HC4 type domain containing protein, expressed
LOC_Os02g15290.1	542.891	724.545	110.107	40.4003	0.118749	0.00467275	VQ domain containing protein, putative, expressed
LOC_Os02g15760.1	2.36554	0	32.688	27.8313	25.5838	0.0203722	helix-loop-helix DNA-binding domain containing protein, expressed
LOC_Os02g15810.1	249.564	211.718	3292.03	4707.08	17.3411	3.65e-05	HMG1/2, putative, expressed
LOC_Os02g16030.1	87.5249	103.506	550.535	1045.92	8.35703	0.00343567	harpin-induced protein 1 domain containing protein, expressed
LOC_Os02g17000.1	9.46215	10.5859	164.3	161.601	16.256	0.000796072	OsSub14 - Putative Subtilisin homologue, expressed
LOC_Os02g17620.1	0	0	6.88169	9.87563	6599	0.0486112	isochorismatase family protein, putative, expressed
LOC_Os02g17780.1	11.8277	4.70484	27.5268	88.8807	7.04112	0.034355	ent-kaurene synthase, chloroplast precursor, putative, expressed
LOC_Os02g18410.1	38041.4	46270.9	6325.13	8585.51	0.17685	0.0186209	salt stress root protein RS1, putative, expressed
LOC_Os02g18540.1	48.4935	63.5153	3.44084	7.18228	0.0948418	0.033597	uncharacterized Cys-rich domain containing protein, putative, expressed
LOC_Os02g19530.1	0	0	72.2577	77.2095	6599	8.4e-06	lectin-like receptor kinase, putative, expressed
LOC_Os02g19640.1	2.36554	0	182.365	192.126	158.311	6.92e-08	IQ calmodulin-binding motif family protein, putative, expressed
LOC_Os02g19820.1	449.452	497.536	3544.93	5445.06	9.49324	0.00131761	nodulin MtN3 family protein, putative, expressed
LOC_Os02g20360.1	26.0209	43.5197	901.501	2307.31	46.1429	1.27e-07	tyrosine aminotransferase, putative, expressed
LOC_Os02g20540.1	0	1.17621	331.181	579.969	774.65	1.98e-11	fasciclin domain containing protein, expressed
LOC_Os02g20560.1	1.18277	2.35242	246.881	605.107	241.002	3.09e-10	fasciclin domain containing protein, expressed
LOC_Os02g21300.1	778.262	1033.89	30.9676	70.0272	0.055732	5.59e-05	transposon protein, putative, unclassified, expressed
LOC_Os02g22680.1	109.998	169.374	0	3.59114	0.0128543	1.06e-05	integral membrane protein DUF6 containing protein, expressed
LOC_Os02g25280.1	13.0105	1.17621	132.472	63.7427	13.831	0.00452452	retrotransposon protein, putative, Ty1-copia subclass, expressed
LOC_Os02g26140.1	14.1932	2.35242	71.3975	114.916	11.2606	0.00446069	microtubule-binding protein TANGLED1, putative, expressed
LOC_Os02g26210.1	4.73108	2.35242	314.837	307.042	87.7928	1.11e-07	flowering promoting factor-like 1, putative, expressed
LOC_Os02g26600.1	34.3003	48.2246	373.332	388.741	9.23446	0.00324183	ATP binding, related, putative, expressed
LOC_Os02g26650.3	134.836	182.312	903.222	1343.98	7.08567	0.00708318	delta14-sterol reductase, putative, expressed
LOC_Os02g26670.1	2.36554	2.35242	26.6665	52.9693	16.8793	0.020254	F-box/Kelch-repeat protein, putative, expressed
LOC_Os02g26770.1	9148.72	9421.43	324.3	795.437	0.0602977	4.42e-05	cytochrome P450, putative, expressed
LOC_Os02g26810.1	2978.21	3018.15	130.752	227.139	0.0596848	5.04e-05	cytochrome P450, putative, expressed
LOC_Os02g26840.1	5.91384	1.17621	51.6127	90.6762	20.0688	0.0010969	O-acyltransferase, putative, expressed
LOC_Os02g27000.1	196.34	139.969	781.072	833.144	4.79981	0.0477671	ATP-binding region, ATPase-like domain containing protein, expressed
LOC_Os02g27500.1	689.554	746.893	114.408	108.632	0.155272	0.0138351	Leucine Rich Repeat family protein, expressed
LOC_Os02g27690.1	81.6111	74.1012	8.60211	8.08006	0.107135	0.0382907	Leucine Rich Repeat family protein, expressed
LOC_Os02g28470.1	72.1489	38.8149	376.772	402.207	7.02013	0.0113721	transferase family protein, putative, expressed
LOC_Os02g29130.1	39.0314	57.6342	0.860211	4.48892	0.0553365	0.018688	ankyrin, putative, expressed
LOC_Os02g29960.1	18.9243	25.8766	184.945	355.523	12.0638	0.000933074	cytochrome P450, putative, expressed
LOC_Os02g30110.1	0	0	139.354	66.4361	6599	9.07e-07	cytochrome P450, putative, expressed
LOC_Os02g30240.1	18.9243	38.8149	179.784	205.593	6.67444	0.0191716	expressed protein
LOC_Os02g30650.1	285.047	250.533	1222.36	1283.83	4.6794	0.049873	heavy metal-associated domain containing protein, expressed
LOC_Os02g30780.1	3531.75	4629.56	879.136	707.454	0.194404	0.0313408	LGC1, putative, expressed
LOC_Os02g30850.1	3.54831	9.40967	100.645	96.9607	15.2497	0.00187267	OsGrx_C8 - glutaredoxin subgroup III, expressed
LOC_Os02g31840.1	0	0	24.9461	26.9335	6599	0.00741544	expressed protein
LOC_Os02g32420.1	8.27938	14.1145	147.956	149.93	13.3021	0.00197958	protein binding protein, putative, expressed
LOC_Os02g32504.1	18.9243	37.6387	130.752	220.855	6.2162	0.0224456	heparan-alpha-glucosaminide N-acetyltransferase, putative, expressed
LOC_Os02g32580.1	11.8277	11.7621	276.988	164.295	18.7065	0.000164356	expressed protein
LOC_Os02g32814.1	6359.75	7354.83	636.556	737.081	0.100159	0.000981205	heavy metal-associated domain containing protein, expressed
LOC_Os02g33420.1	16.5588	27.0528	245.16	249.584	11.3443	0.00170803	ATPase, AAA family protein, expressed
LOC_Os02g33670.1	3.54831	2.35242	36.1289	27.8313	10.8394	0.0465153	expressed protein
LOC_Os02g33820.1	283.865	144.674	1308.38	1220.09	5.90022	0.0176078	abscisic stress-ripening, putative, expressed
LOC_Os02g34440.1	3.54831	0	168.601	116.712	80.4083	5.52e-06	retrotransposon protein, putative, Ty3-gypsy subclass, expressed
LOC_Os02g34810.1	308.703	219.951	2748.37	2514.69	9.95561	0.0010343	OsAPx8 - Thylakoid-bound Ascorbate Peroxidase encoding gene 5,8, expressed
LOC_Os02g35180.1	95.8043	96.4491	596.986	658.076	6.52817	0.0132081	OsRR2 type-A response regulator, expressed
LOC_Os02g35230.1	0	4.70484	97.2038	168.783	56.5349	3.64e-06	expressed protein
LOC_Os02g35320.1	44.9452	24.7004	525.589	388.741	13.1283	0.000485236	expressed protein
LOC_Os02g35660.1	0	4.70484	56.7739	52.0715	23.1348	0.00282126	PTF1, putative, expressed
LOC_Os02g35760.1	1.18277	1.17621	34.4084	28.7291	26.7648	0.0303141	STRUBBELIG-RECEPTOR FAMILY 7 precursor, putative, expressed
LOC_Os02g36110.1	2.36554	2.35242	44.731	24.2402	14.6189	0.0365569	cytochrome P450, putative, expressed
LOC_Os02g36140.2	26.0209	15.2907	230.537	208.286	10.6223	0.00198196	terpene synthase, putative, expressed
LOC_Os02g36414.1	2539.4	2134.82	552.255	425.55	0.209191	0.0453152	transporter family protein, putative, expressed
LOC_Os02g36550.1	59.1384	31.7576	203.87	607.8	8.92965	0.0027262	phosphopantothenate--cysteine ligase, putative, expressed
LOC_Os02g36590.1	1.18277	2.35242	471.396	653.587	318.224	5.66e-11	CPuORF19 - conserved peptide uORF-containing transcript, expressed
LOC_Os02g36590.3	0	0	17.2042	26.9335	6599	0.00152229	CPuORF19 - conserved peptide uORF-containing transcript, expressed
LOC_Os02g36830.1	63.8695	63.5153	9.46232	6.28449	0.123616	0.0119343	cytokinin-O-glucosyltransferase 2, putative, expressed
LOC_Os02g36890.1	44.9452	25.8766	579.782	781.073	19.2152	3.95e-05	MYB family transcription factor, putative, expressed
LOC_Os02g37070.1	29.5692	47.0484	212.472	256.766	6.12442	0.0257627	expressed protein
LOC_Os02g37190.1	229.457	76.4536	1463.22	1609.73	10.0452	0.00112493	expressed protein
LOC_Os02g37490.1	80071.1	109599	1893.32	939.98	0.0149381	4.27e-09	glycine-rich cell wall structural protein precursor, putative, expressed
LOC_Os02g37580.1	253.113	209.365	45.5912	35.0136	0.174289	0.0354041	fimbrin-like protein 2, putative, expressed
LOC_Os02g37654.1	0	0	3.44084	17.9557	6599	0.0218499	lecithin:cholesterol acyltransferase, putative, expressed
LOC_Os02g37690.1	4.73108	24.7004	98.0641	254.971	11.9952	0.000923079	UDP-glucoronosyl and UDP-glucosyl transferase, putative, expressed
LOC_Os02g37700.1	0	0	25.8063	64.6405	6599	1.61e-05	lecithin:cholesterol acyltransferase, putative, expressed
LOC_Os02g37760.1	0	0	52.4729	42.1959	6599	0.000201515	lecithine cholesterol acyltransferase, putative, expressed
LOC_Os02g37770.1	0	0	271.827	415.674	6599	1.01e-10	lecithin cholesterol acyltransferase, putative, expressed
LOC_Os02g37780.1	0	0	132.472	217.264	6599	2.77e-08	lecithine cholesterol acyltransferase, putative, expressed
LOC_Os02g37790.1	0	0	24.9461	25.138	6599	0.00777524	retrotransposon protein, putative, unclassified, expressed
LOC_Os02g37800.1	41.3969	28.229	3159.56	4348.87	107.839	2.52e-10	lecithin:cholesterol acyltransferase, putative, expressed
LOC_Os02g38040.1	0	1.17621	26.6665	28.7291	47.0968	0.023454	leucine-rich repeat family protein, putative, expressed
LOC_Os02g38290.1	28.3865	5.88104	293.332	214.571	14.8217	0.000354881	cytochrome P450, putative, expressed
LOC_Os02g39000.1	4.73108	12.9383	92.0426	47.5826	7.9021	0.0331816	remorin C-terminal domain containing protein, putative, expressed
LOC_Os02g39330.1	3305.84	3619.2	516.127	439.017	0.137926	0.00599389	CHIT1 - Chitinase family protein precursor, expressed
LOC_Os02g39390.1	18.9243	32.9339	141.935	219.957	6.9785	0.0133507	expressed protein
LOC_Os02g39620.1	6611.68	6493.85	798.276	980.381	0.135718	0.00513793	ATOZI1, putative, expressed
LOC_Os02g40070.1	2.36554	0	31.8278	51.1737	35.0878	0.00278164	AP2-like ethylene-responsive transcription factor PLETHORA 2, putative, expressed
LOC_Os02g40100.1	17.7415	7.05725	723.437	1068.36	72.2536	1.15e-08	plant protein of unknown function DUF869 domain containing protein, expressed
LOC_Os02g40410.1	9.46215	27.0528	103.225	160.703	7.22796	0.0145077	expressed protein
LOC_Os02g40440.1	94.6215	75.2774	2965.15	3223.94	36.4281	3.41e-07	GDSL-like lipase/acylhydrolase, putative, expressed
LOC_Os02g40530.1	2.36554	2.35242	54.1933	29.6269	17.7662	0.0224456	MYB family transcription factor, putative, expressed
LOC_Os02g40730.1	0	4.70484	45.5912	91.574	29.1541	0.000472364	ammonium transporter protein, putative, expressed
LOC_Os02g40784.1	721.489	675.144	12349.2	9145.73	15.3905	6.78e-05	WAX2, putative, expressed
LOC_Os02g40950.1	85.1594	61.1629	0.860211	0	0.00587888	3.96e-05	transposon protein, putative, unclassified, expressed
LOC_Os02g41460.1	9.46215	5.88104	280.429	307.042	38.2887	2.68e-06	DUF640 domain containing protein, putative, expressed
LOC_Os02g41710.1	0	0	11.1827	31.4225	6599	0.00969389	cyclic nucleotide-gated ion channel, putative, expressed
LOC_Os02g41840.1	277.951	421.083	73.1179	56.5604	0.185511	0.0425419	DUF584 domain containing protein, putative, expressed
LOC_Os02g41860.1	12138.8	14253.3	338.923	881.624	0.0462468	7.91e-06	aquaporin protein, putative, expressed
LOC_Os02g41860.2	2824.45	4114.38	95.4834	254.971	0.0505062	1.64e-05	aquaporin protein, putative, expressed
LOC_Os02g41954.2	270.854	286.995	51.6127	25.138	0.137583	0.0153849	gibberellin 2-beta-dioxygenase 7, putative, expressed
LOC_Os02g42060.1	1.18277	0	47.3116	50.2759	82.5077	0.000316568	response regulator receiver domain containing protein, expressed
LOC_Os02g42430.1	580.74	610.452	151.397	79.9028	0.194175	0.0420638	GEM, putative, expressed
LOC_Os02g42560.1	33.1175	31.7576	459.353	592.538	16.2141	0.000105555	expressed protein
LOC_Os02g42585.1	248.381	516.356	55.0535	93.3696	0.194084	0.0448562	AP2 domain containing protein, expressed
LOC_Os02g42620.1	0	0	24.9461	11.6712	6599	0.0196482	protein kinase, putative, expressed
LOC_Os02g42650.1	7.09661	2.35242	141.075	419.265	59.3013	3.23e-07	expansin precursor, putative, expressed
LOC_Os02g42740.1	28.3865	37.6387	233.977	307.94	8.20774	0.00575523	cytochrome b5-like Heme/Steroid binding domain containing protein, expressed
LOC_Os02g42870.1	3.54831	0	45.5912	84.3917	36.6324	0.00086024	MYB family transcription factor, putative, expressed
LOC_Os02g43120.1	1.18277	8.23346	37.8493	81.6984	12.6959	0.014587	zinc finger, C3HC4 type domain containing protein, expressed
LOC_Os02g43170.1	2655.32	3954.41	844.727	527	0.207531	0.0431621	B-box zinc finger family protein, putative, expressed
LOC_Os02g43170.2	456.549	638.681	75.6986	54.7649	0.11912	0.00476647	B-box zinc finger family protein, putative, expressed
LOC_Os02g43370.1	948.581	1203.26	12353.5	7967.84	9.44369	0.00128664	transposon protein, putative, unclassified, expressed
LOC_Os02g43410.1	0	0	525.589	1424.78	6599	3.34e-14	transposon protein, putative, unclassified, expressed
LOC_Os02g43540.1	26.0209	25.8766	404.299	360.012	14.7273	0.000297022	retrotransposon protein, putative, unclassified, expressed
LOC_Os02g43560.1	4.73108	2.35242	48.1718	63.7427	15.7993	0.00488051	WRKY34, expressed
LOC_Os02g43660.1	56.7729	30.5814	263.225	580.867	9.66284	0.00205536	plastocyanin-like domain containing protein, putative, expressed
LOC_Os02g44090.1	3.54831	1.17621	34.4084	24.2402	12.4137	0.0447835	zinc finger protein, putative, expressed
LOC_Os02g44108.1	21362	22289.2	2935.04	4020.28	0.159339	0.0111453	expansin precursor, putative, expressed
LOC_Os02g44300.1	790.09	842.166	87.7415	121.201	0.128008	0.00528151	MSP domain containing protein, expressed
LOC_Os02g44320.1	1550.61	1146.8	9683.4	17001.3	9.89271	0.00100445	LTPL113 - Protease inhibitor/seed storage/LTP family protein precursor, expressed
LOC_Os02g44590.1	11.8277	3.52863	94.6232	57.4582	9.90351	0.0250116	OsSub20 - Putative Subtilisin homologue, expressed
LOC_Os02g44630.1	221064	246004	28972.8	36264.2	0.139673	0.00571049	aquaporin protein, putative, expressed
LOC_Os02g44730.1	22.4726	31.7576	178.064	156.215	6.16405	0.0242611	tetracycline transporter protein, putative, expressed
LOC_Os02g44740.1	15.376	25.8766	492.041	307.042	19.3705	5.57e-05	expressed protein
LOC_Os02g45010.1	21.2898	14.1145	176.343	223.548	11.295	0.00209279	ethylene-responsive protein related, putative, expressed
LOC_Os02g45160.1	4.73108	14.1145	79.9996	61.9471	7.5321	0.0329416	aluminum-activated malate transporter, putative, expressed
LOC_Os02g46030.1	114.729	89.3919	1383.22	1807.24	15.6303	9.66e-05	MYB family transcription factor, putative, expressed
LOC_Os02g46340.1	24.8381	31.7576	205.59	267.54	8.35981	0.00794059	RING-H2 finger protein ATL3J, putative, expressed
LOC_Os02g46360.1	642.244	863.337	175.483	102.347	0.184534	0.0318509	invertase/pectin methylesterase inhibitor family protein, putative, expressed
LOC_Os02g47130.1	306.337	278.762	2004.29	3127.88	8.77147	0.0021072	expressed protein
LOC_Os02g47180.1	177.415	194.074	1578.49	2113.38	9.93802	0.00108137	WD repeat-containing protein, putative, expressed
LOC_Os02g47310.1	20.1071	23.5242	188.386	273.824	10.5936	0.00146502	Cyclopropane-fatty-acyl-phospholipid synthase, putative, expressed
LOC_Os02g47470.2	733.317	691.611	148.817	93.3696	0.169964	0.0222512	cytochrome P450, putative, expressed
LOC_Os02g47510.1	11.8277	14.1145	43.0106	124.792	6.46833	0.0289061	9-cis-epoxycarotenoid dioxygenase 1, chloroplast precursor, putative, expressed
LOC_Os02g47780.1	4.73108	10.5859	79.9996	158.01	15.539	0.000704469	hydrolase, alpha/beta fold family domain containing protein, expressed
LOC_Os02g48094.1	15.376	12.9383	104.946	78.1073	6.46504	0.039947	expressed protein
LOC_Os02g48150.1	4.73108	12.9383	129.892	57.4582	10.6031	0.00871584	expressed protein
LOC_Os02g48570.1	1.18277	4.70484	47.3116	69.1294	19.7773	0.00100445	peptide transporter PTR2, putative, expressed
LOC_Os02g48690.1	34.3003	105.859	5.16127	6.28449	0.0816626	0.0235108	expressed protein
LOC_Os02g48900.1	514.504	492.832	2426.66	4540.1	6.91602	0.00733819	aspartic proteinase nepenthesin-1 precursor, putative, expressed
LOC_Os02g49260.1	2.36554	3.52863	50.7525	68.2316	20.1868	0.00193891	transporter-related, putative, expressed
LOC_Os02g49720.1	8481.64	8740.41	84908.9	54919.3	8.11914	0.00289533	aldehyde dehydrogenase, putative, expressed
LOC_Os02g49720.2	497.946	671.615	6024.06	3795.83	8.39622	0.00256297	aldehyde dehydrogenase, putative, expressed
LOC_Os02g49920.1	261.392	232.889	1546.66	1626.79	6.42032	0.0110309	3-ketoacyl-CoA synthase, putative, expressed
LOC_Os02g50000.1	0	1.17621	28.387	42.1959	60.0088	0.000585601	GDSL-like lipase/acylhydrolase, putative, expressed
LOC_Os02g50040.1	99.3526	83.5108	734.62	1147.37	10.2918	0.00106707	endoglucanase, putative, expressed
LOC_Os02g50050.1	1.18277	2.35242	22.3655	57.4582	22.5798	0.0109671	expressed protein
LOC_Os02g51060.1	363.11	377.563	1515.69	2063.11	4.83182	0.0427438	CSLA6 - cellulose synthase-like family A; mannan synthase, expressed
LOC_Os02g51110.1	31.9348	17.6431	942.791	781.97	34.7889	1.01e-06	aquaporin protein, putative, expressed
LOC_Os02g51130.1	4.73108	1.17621	37.8493	37.707	12.7903	0.0344745	glycosyl transferase 8 domain containing protein, putative, expressed
LOC_Os02g51550.1	0	0	28.387	55.6626	6599	0.000168779	DUF581 domain containing protein, expressed
LOC_Os02g51610.1	1272.66	1384.4	239.139	256.766	0.186637	0.027306	CRAL/TRIO domain containing protein, expressed
LOC_Os02g51680.1	4.73108	0	35.2687	49.3781	17.8917	0.00658607	uncharacterized glycosyl hydrolase Rv2006/MT2062, putative, expressed
LOC_Os02g51760.1	11.8277	4.70484	66.2362	79.005	8.78518	0.0224456	expressed protein
LOC_Os02g51799.1	0	0	22.3655	33.218	6599	0.00245563	MYB family transcription factor, putative, expressed
LOC_Os02g51950.1	154.943	155.26	855.05	1259.59	6.81698	0.00896198	expressed protein
LOC_Os02g51970.1	9669.14	10936.4	1544.94	1020.78	0.124516	0.00330017	phosphate-induced protein 1 conserved region domain containing protein, expressed
LOC_Os02g52000.1	6457.92	6878.47	661.502	659.872	0.0990803	0.000944268	phosphate-induced protein 1 conserved region domain containing protein, expressed
LOC_Os02g52190.1	31.9348	19.9956	241.719	339.363	11.1896	0.00151958	helix-loop-helix DNA-binding protein, putative, expressed
LOC_Os02g52340.1	146.663	121.15	670.965	772.095	5.38831	0.0294975	OsMADS22 - MADS-box family gene with MIKCc type-box, expressed
LOC_Os02g52630.1	0	0	43.0106	45.787	6599	0.000220334	xyloglucan fucosyltransferase, putative, expressed
LOC_Os02g52810.1	405.69	411.673	2018.92	2138.52	5.0864	0.0329244	remorin C-terminal domain containing protein, putative, expressed
LOC_Os02g52930.1	0	0	5.16127	24.2402	6599	0.0156059	integral membrane protein DUF6 containing protein, expressed
LOC_Os02g53130.1	2.36554	0	31.8278	219.059	106.059	1.46e-05	nitrate reductase, putative, expressed
LOC_Os02g53200.1	1510.4	1490.26	6592.66	7814.32	4.80128	0.0413089	glucan endo-1,3-beta-glucosidase precursor, putative, expressed
LOC_Os02g53200.2	30.752	50.577	233.117	248.686	5.92413	0.0278859	glucan endo-1,3-beta-glucosidase precursor, putative, expressed
LOC_Os02g53530.1	36.6658	23.5242	1011.61	834.94	30.6786	2.04e-06	ZOS2-17 - C2H2 zinc finger protein, expressed
LOC_Os02g54100.1	5.91384	5.88104	53.3331	50.2759	8.78423	0.0272693	expressed protein
LOC_Os02g54240.1	5.91384	7.05725	146.236	117.61	20.341	0.000444843	OsFBX62 - F-box domain containing protein, expressed
LOC_Os02g54450.1	0	0	25.8063	32.3202	6599	0.00440526	hypro1, putative, expressed
LOC_Os02g54530.1	197.522	279.938	13.7634	9.87563	0.0495099	0.000227427	SCP-like extracellular protein, expressed
LOC_Os02g55050.1	1.18277	0	36.9891	31.4225	57.8402	0.00338402	OsFBX64 - F-box domain containing protein, expressed
LOC_Os02g55190.1	5.91384	0	128.171	144.543	46.1146	9.24e-06	expressed protein
LOC_Os02g55500.1	31.9348	22.348	0.860211	2.69335	0.065464	0.0247715	expressed protein
LOC_Os02g56120.1	667.082	852.752	74.8384	145.441	0.144937	0.0101053	OsIAA9 - Auxin-responsive Aux/IAA gene family member, expressed
LOC_Os02g56380.1	10705.2	9682.55	2016.33	1796.47	0.187014	0.0252658	OsWAK21 - OsWAK receptor-like cytoplasmic kinase OsWAK-RLCK, expressed
LOC_Os02g56510.1	39.0314	35.2863	354.407	557.524	12.2707	0.000502254	phosphate transporter 1, putative, expressed
LOC_Os02g56540.1	67.4178	54.1056	516.127	706.556	10.0613	0.00126594	kinesin motor domain containing protein, putative, expressed
LOC_Os02g56600.1	1.18277	2.35242	80.8598	109.53	53.8556	1.4e-05	no apical meristem protein, putative, expressed
LOC_Os02g56700.1	46.128	63.5153	371.611	330.385	6.40254	0.0146937	dehydrogenase, putative, expressed
LOC_Os02g56920.1	3139.07	2000.73	20361.2	23336.1	8.50175	0.00230177	WAX2, putative, expressed
LOC_Os02g57090.1	14.1932	21.1718	276.988	272.926	15.5497	0.000285155	anthranilate phosphoribosyltransferase, putative, expressed
LOC_Os02g57110.1	2159.74	1705.5	10593.5	15576.6	6.77062	0.00789311	GDSL-like lipase/acylhydrolase, putative, expressed
LOC_Os02g57110.2	2.36554	0	42.1503	26.0358	28.8248	0.00865318	GDSL-like lipase/acylhydrolase, putative, expressed
LOC_Os02g58100.1	0	1.17621	43.8708	81.6984	106.758	8.22e-05	expressed protein
LOC_Os02g58214.1	15.376	5.88104	521.288	727.205	58.7332	8.47e-08	expressed protein
LOC_Os02g58310.1	104.084	36.4625	1107.09	1468.78	18.3276	3.67e-05	expressed protein
LOC_Os02g58310.2	0	0	55.9137	61.0493	6599	6.43e-05	expressed protein
LOC_Os02g58310.3	4.73108	3.52863	50.7525	54.7649	12.775	0.0162083	expressed protein
LOC_Os02g58390.1	123.008	76.4536	642.578	917.536	7.82162	0.00482957	inactive receptor kinase At2g26730 precursor, putative, expressed
LOC_Os02g58790.1	115.911	55.2818	519.567	597.924	6.52767	0.0121336	cell division inhibitor, putative, expressed
LOC_Os03g01260.1	764.069	799.822	78.2792	101.45	0.114924	0.0031869	expansin precursor, putative, expressed
LOC_Os03g01270.1	406.873	410.497	1436.55	2480.58	4.79236	0.0448098	expansin precursor, putative, expressed
LOC_Os03g01290.1	0	0	37.8493	49.3781	6599	0.000384586	peptide transporter PTR2, putative, expressed
LOC_Os03g01300.1	20.1071	21.1718	128.171	227.139	8.60758	0.00452512	LTPL114 - Protease inhibitor/seed storage/LTP family protein precursor, expressed
LOC_Os03g01320.1	200916	226101	17569	24598.4	0.0987486	0.000845919	LTPL116 - Protease inhibitor/seed storage/LTP family protein precursor, expressed
LOC_Os03g01420.1	113.546	91.7443	0	2.69335	0.0131197	2.8e-05	expressed protein
LOC_Os03g01490.1	34.3003	23.5242	0	0	0	0.00310699	expressed protein
LOC_Os03g01800.1	2.36554	2.35242	206.451	416.572	132.054	7.21e-09	glycosyl hydrolases family 16, putative, expressed
LOC_Os03g01930.1	24.8381	37.6387	183.225	377.967	8.9824	0.00514017	retrotransposon protein, putative, unclassified, expressed
LOC_Os03g01980.1	117.094	152.907	1003.01	957.936	7.26271	0.00665335	KIP1, putative, expressed
LOC_Os03g02040.1	46786.8	46459.1	6419.75	6956.03	0.143446	0.00670789	remorin, putative, expressed
LOC_Os03g02190.1	126.556	142.321	517.847	863.669	5.13808	0.0367905	protein kinase domain containing protein, expressed
LOC_Os03g02280.1	3.54831	5.88104	97.2038	102.347	21.1628	0.000643714	DUF584 domain containing protein, putative, expressed
LOC_Os03g02290.1	75.6972	84.687	352.687	453.381	5.02585	0.0417244	kinesin motor domain containing protein, putative, expressed
LOC_Os03g02460.1	85.1594	48.2246	738.061	725.41	10.9719	0.000911309	retinol dehydrogenase, putative, expressed
LOC_Os03g02920.1	41818	45893.3	7934.59	8040.56	0.182133	0.0217841	peroxidase precursor, putative, expressed
LOC_Os03g02939.1	352.465	451.664	66.2362	40.4003	0.132611	0.00935341	peroxidase precursor, putative, expressed
LOC_Os03g03000.1	2.36554	0	31.8278	24.2402	23.702	0.00935571	helix-loop-helix DNA-binding domain containing protein, expressed
LOC_Os03g03260.1	8.27938	3.52863	140.214	203.797	29.1337	3.95e-05	homeobox domain containing protein, expressed
LOC_Os03g03334.1	312.251	869.218	40.4299	27.8313	0.0577766	0.000103035	expressed protein
LOC_Os03g03500.1	0	7.05725	132.472	149.93	40.0159	2.07e-05	heavy metal-associated domain containing protein, expressed
LOC_Os03g03630.1	40.2141	21.1718	350.106	599.72	15.473	0.000143043	expressed protein
LOC_Os03g03670.1	240.102	187.017	1174.19	1130.31	5.39544	0.0270532	expressed protein
LOC_Os03g03680.1	7.09661	4.70484	115.268	53.8671	14.3317	0.00456544	transporter family protein, putative, expressed
LOC_Os03g03724.1	1169.76	929.205	55.9137	73.6183	0.0617124	9.93e-05	expressed protein
LOC_Os03g03724.2	216.447	274.057	13.7634	16.1601	0.0610057	0.000588992	expressed protein
LOC_Os03g03760.1	1.18277	0	67.9567	72.7205	118.939	5.87e-05	MYB family transcription factor, putative, expressed
LOC_Os03g03810.1	283.865	410.497	32.688	38.6047	0.102674	0.00299572	DEF8 - Defensin and Defensin-like DEFL family, expressed
LOC_Os03g03910.1	211.716	191.722	553.116	1610.63	5.36326	0.0274811	catalase domain containing protein, expressed
LOC_Os03g04060.1	7.09661	0	125.591	154.419	39.4568	6.36e-05	CHIT16 - Chitinase family protein precursor, expressed
LOC_Os03g04110.1	6054.59	7034.91	588.384	810.699	0.106886	0.0013925	lysM domain-containing GPI-anchored protein precursor, putative, expressed
LOC_Os03g04190.1	0	2.35242	54.1933	55.6626	46.6992	0.000326851	cytochrome P450, putative, expressed
LOC_Os03g04530.1	4.73108	2.35242	810.319	878.033	238.35	4.55e-11	cytochrome P450, putative, expressed
LOC_Os03g04550.1	117.094	92.9205	561.718	644.609	5.74401	0.0209867	expressed protein
LOC_Os03g04570.1	480.204	443.431	2872.24	1990.39	5.26467	0.0275592	peptide transporter PTR3-A, putative, expressed
LOC_Os03g04950.1	17.7415	23.5242	164.3	123.894	6.98387	0.0166925	OsSub26 - Putative Subtilisin homologue, expressed
LOC_Os03g05070.1	0	0	27.5268	31.4225	6599	0.0040199	exostosin family domain containing protein, expressed
LOC_Os03g05140.1	4791.4	5732.84	261.504	303.451	0.0536813	2.38e-05	receptor-like protein kinase 2 precursor, putative, expressed
LOC_Os03g05210.1	18.9243	12.9383	98.9243	123.894	6.99311	0.0368325	WD domain, G-beta repeat domain containing protein, expressed
LOC_Os03g05270.1	104.084	64.6915	699.352	494.679	7.07468	0.00859585	RING finger and CHY zinc finger domain-containing protein 1, putative, expressed
LOC_Os03g05270.2	16.5588	4.70484	90.3222	66.4361	7.37214	0.0364017	RING finger and CHY zinc finger domain-containing protein 1, putative, expressed
LOC_Os03g05290.1	292336	324482	43060.4	42858.4	0.139294	0.00569941	aquaporin protein, putative, expressed
LOC_Os03g05390.12	1.18277	3.52863	16.344	42.1959	12.4252	0.0168722	Citrate transporter protein, putative, expressed
LOC_Os03g05500.1	54.4074	34.1101	2.58063	4.48892	0.0798663	0.0292925	DUF260 domain containing protein, putative, expressed
LOC_Os03g05530.1	3.54831	0	136.774	161.601	84.0893	1.4e-06	nodulin, putative, expressed
LOC_Os03g05640.1	184.512	94.0967	911.824	565.604	5.30288	0.0313551	inorganic phosphate transporter, putative, expressed
LOC_Os03g06000.1	7.09661	4.70484	79.9996	83.494	13.8537	0.00419465	expansin precursor, putative, expressed
LOC_Os03g06139.1	124.191	97.6253	578.062	641.916	5.49995	0.0274684	ABC-2 type transporter domain containing protein, expressed
LOC_Os03g06200.1	1789.53	2471.22	13840.8	6797.13	4.84374	0.0386052	aminotransferase, putative, expressed
LOC_Os03g06350.1	4.73108	18.8193	77.419	77.2095	6.56585	0.0424971	DUF623 domain containing protein, expressed
LOC_Os03g06460.1	5.91384	3.52863	47.3116	42.1959	9.47924	0.0329722	type I inositol-1,4,5-trisphosphate 5-phosphatase, putative, expressed
LOC_Os03g06610.1	4.73108	8.23346	75.6986	123.894	15.3953	0.00160741	expressed protein
LOC_Os03g06700.1	2612.74	3619.2	488.6	365.398	0.137036	0.00592815	3-ketoacyl-CoA synthase, putative, expressed
LOC_Os03g06705.1	8077.13	10902.3	1482.14	1032.45	0.132491	0.00458712	3-ketoacyl-CoA synthase, putative, expressed
LOC_Os03g06850.1	23.6554	11.7621	234.838	158.01	11.0919	0.00183665	B3 DNA binding domain containing protein, expressed
LOC_Os03g06850.2	4.73108	2.35242	54.1933	34.1158	12.4669	0.0138976	B3 DNA binding domain containing protein, expressed
LOC_Os03g06850.3	0	1.17621	26.6665	15.2623	35.6475	0.0493495	B3 DNA binding domain containing protein, expressed
LOC_Os03g06960.1	98.1698	87.0395	0.860211	7.18228	0.0434238	0.00200496	vesicle-associated membrane protein, putative, expressed
LOC_Os03g07100.1	781.81	551.642	3376.33	3971.8	5.5106	0.0221159	LTPL82 - Protease inhibitor/seed storage/LTP family protein precursor, expressed
LOC_Os03g07200.1	1.18277	1.17621	25.8063	35.0136	25.7823	0.00268464	expressed protein
LOC_Os03g07260.1	2.36554	3.52863	64.5158	114.019	30.29	0.000173292	tetratricopeptide repeat domain containing protein, expressed
LOC_Os03g07540.1	1.18277	0	109.247	118.508	192.56	4.4e-06	bHLH family protein, putative, expressed
LOC_Os03g07590.1	1596.74	1045.65	128.171	107.734	0.0892774	0.000657546	expressed protein
LOC_Os03g07600.1	5346.12	5775.19	935.91	896.887	0.164801	0.0138271	calcium-binding protein, putative, expressed
LOC_Os03g07810.1	83.9766	41.1673	313.117	529.693	6.73472	0.0108897	expressed protein
LOC_Os03g07940.1	0	0	36.1289	27.8313	6599	0.00184129	AP2 domain containing protein, expressed
LOC_Os03g08170.1	17.7415	14.1145	170.322	119.405	9.09489	0.00783172	protein kinase APK1B, chloroplast precursor, putative, expressed
LOC_Os03g08550.1	13402	14545	2497.19	3069.53	0.199189	0.0331076	STRUBBELIG-RECEPTOR FAMILY 6 precursor, putative, expressed
LOC_Os03g08560.1	1091.7	1389.1	196.988	246.891	0.178926	0.0232168	plasma membrane ATPase, putative, expressed
LOC_Os03g08600.1	20.1071	16.4669	444.729	542.262	26.9861	7.05e-06	glycosyl transferase, putative, expressed
LOC_Os03g08610.1	2.36554	2.35242	43.0106	50.2759	19.7726	0.00317793	leucine-rich repeat family protein, putative, expressed
LOC_Os03g08620.1	18.9243	17.6431	254.622	371.683	17.1274	0.000109745	B3 DNA binding domain containing protein, expressed
LOC_Os03g08754.1	1.18277	0	311.396	421.061	619.273	1.69e-10	OsMADS47 - MADS-box family gene with MIKCc type-box, expressed
LOC_Os03g08754.2	2.36554	0	43.8708	55.6626	42.0764	0.000825578	OsMADS47 - MADS-box family gene with MIKCc type-box, expressed
LOC_Os03g09070.1	68.6006	81.1584	677.846	427.345	7.3798	0.00785968	leucine rich repeat domain containing protein, putative, expressed
LOC_Os03g09120.1	172.684	132.912	560.858	984.87	5.05808	0.039119	expressed protein
LOC_Os03g09200.1	7.09661	2.35242	96.3436	118.508	22.7379	0.000366042	domain of unknown function DUF966 domain containing protein, expressed
LOC_Os03g09880.1	0	0	12.9032	63.7427	6599	0.00195365	AIR12, putative, expressed
LOC_Os03g10030.1	177.415	194.074	1638.7	2175.33	10.2669	0.000933171	membrane associated DUF588 domain containing protein, putative, expressed
LOC_Os03g10090.1	2.36554	2.35242	130.752	345.647	100.976	4.28e-08	transporter family protein, putative, expressed
LOC_Os03g10210.1	23.6554	15.2907	309.676	223.548	13.6913	0.000660537	homeobox domain containing protein, expressed
LOC_Os03g10880.1	275.585	174.079	1854.61	1736.32	7.98581	0.00365098	BTBN5 - Bric-a-Brac, Tramtrack, Broad Complex BTB domain with non-phototropic hypocotyl 3 NPH3 and coiled-coil domains, expressed
LOC_Os03g11400.1	24.8381	14.1145	172.042	215.468	9.94824	0.00242048	targeting protein-related, putative, expressed
LOC_Os03g11600.1	0	0	103.225	162.499	6599	6.62e-08	YABBY domain containing protein, putative, expressed
LOC_Os03g11600.2	0	0	18.0644	22.4446	6599	0.0154612	YABBY domain containing protein, putative, expressed
LOC_Os03g11680.1	9.46215	7.05725	270.106	244.197	31.1333	1.18e-05	ZOS3-05 - C2H2 zinc finger protein, expressed
LOC_Os03g11734.1	2.36554	0	35.2687	43.9914	33.5062	0.00123479	MATE efflux protein, putative, expressed
LOC_Os03g11770.1	37.8486	34.1101	336.343	371.683	9.83933	0.0022566	expressed protein
LOC_Os03g12140.1	221.178	247.004	1569.89	2201.37	8.05511	0.00348288	glucan endo-1,3-beta-glucosidase precursor, putative, expressed
LOC_Os03g12150.1	73.3317	63.5153	393.977	390.536	5.73278	0.0272962	serine/threonine-protein kinase receptor precursor, putative, expressed
LOC_Os03g12500.1	1.18277	1.17621	89.4619	193.921	120.13	6.69e-07	cytochrome P450, putative, expressed
LOC_Os03g12860.1	2.36554	2.35242	85.1609	78.1073	34.6057	0.000307269	homeobox associated leucine zipper, putative, expressed
LOC_Os03g13200.1	146.663	165.845	953.114	1774.92	8.72946	0.00236877	peroxidase precursor, putative, expressed
LOC_Os03g13210.1	0	0	817.2	383.354	6599	1.44e-12	peroxidase precursor, putative, expressed
LOC_Os03g13390.2	47.3108	38.8149	3310.95	3054.26	73.9061	3.99e-09	oxidoreductase, aldo/keto reductase family protein, putative, expressed
LOC_Os03g14080.1	14.1932	25.8766	209.891	294.473	12.5871	0.000821333	transmembrane amino acid transporter protein, putative, expressed
LOC_Os03g14140.1	0	7.05725	38.7095	56.5604	13.4996	0.00827093	POEI16 - Pollen Ole e I allergen and extensin family protein precursor, expressed
LOC_Os03g14210.1	10.6449	9.40967	109.247	193.921	15.1171	0.000712036	glycosyl hydrolases family 17, putative, expressed
LOC_Os03g14642.1	0	0	28.387	52.0715	6599	2.2e-05	LTPL107 - Protease inhibitor/seed storage/LTP family protein precursor, expressed
LOC_Os03g14654.1	1.18277	2.35242	747.523	1599.85	664.003	2.73e-13	LTPL108 - Protease inhibitor/seed storage/LTP family protein precursor, expressed
LOC_Os03g14669.1	53.2246	30.5814	224.515	328.589	6.59981	0.0143817	core histone H2A/H2B/H3/H4, putative, expressed
LOC_Os03g14669.2	7.09661	4.70484	57.6341	74.5161	11.1978	0.00750865	core histone H2A/H2B/H3/H4, putative, expressed
LOC_Os03g15020.1	196.34	164.669	630.535	1126.72	4.86762	0.0424812	beta-galactosidase precursor, putative, expressed
LOC_Os03g15320.1	1081.05	1286.77	209.031	254.073	0.195582	0.0352186	glyoxal oxidase-related, putative, expressed
LOC_Os03g16390.1	2551.23	2788.79	464.514	379.763	0.158104	0.0121035	avr9/Cf-9 rapidly elicited protein, putative, expressed
LOC_Os03g16500.1	4.73108	12.9383	129.032	103.245	13.1457	0.00269782	aspartic proteinase nepenthesin precursor, putative, expressed
LOC_Os03g16610.1	0	1.17621	35.2687	96.0629	111.657	1.54e-05	laccase precursor protein, putative, expressed
LOC_Os03g16960.1	656.437	225.832	4736.32	1278.45	6.81739	0.00789311	cysteine-rich repeat secretory protein 55 precursor, putative, expressed
LOC_Os03g17350.1	9.46215	4.70484	339.783	845.713	83.6802	1.29e-08	white-brown complex homolog protein, putative, expressed
LOC_Os03g17470.1	2.36554	5.88104	55.0535	68.2316	14.9498	0.00211127	IN2-1 protein, putative, expressed
LOC_Os03g17500.1	132.47	123.502	670.965	789.153	5.70421	0.0223499	expressed protein
LOC_Os03g17570.1	6043.95	5816.35	165.161	862.771	0.0866699	0.000383791	response regulator receiver domain containing protein, expressed
LOC_Os03g17570.2	36.6658	47.0484	0.860211	2.69335	0.0424488	0.00345307	response regulator receiver domain containing protein, expressed
LOC_Os03g17570.4	554.719	561.052	19.7849	61.9471	0.0732516	0.000242086	response regulator receiver domain containing protein, expressed
LOC_Os03g17570.6	50.8591	43.5197	0	6.28449	0.066588	0.00679645	response regulator receiver domain containing protein, expressed
LOC_Os03g17860.2	1.18277	2.35242	114.408	85.2895	56.4886	5.53e-05	OsPDIL5-1 protein disulfide isomerase PDIL5-1, expressed
LOC_Os03g17870.1	7.09661	9.40967	691.61	716.432	85.3034	1.15e-08	metallothionein, putative, expressed
LOC_Os03g18030.1	7.09661	7.05725	411.181	215.468	44.2741	1.56e-06	leucoanthocyanidin dioxygenase, putative, expressed
LOC_Os03g18120.1	212.898	250.533	13.7634	14.3646	0.060695	0.000113904	proteins of unknown function domain containing protein, expressed
LOC_Os03g18130.1	612.674	745.717	67.0965	17.0579	0.0619515	7.29e-05	asparagine synthetase, putative, expressed
LOC_Os03g18250.1	1.18277	0	43.0106	75.4139	100.125	0.000244059	expressed protein
LOC_Os03g18300.1	21.2898	16.4669	122.15	242.402	9.65527	0.00357042	chloroplast unusual positioning protein, putative, expressed
LOC_Os03g18400.1	72.1489	74.1012	726.018	635.631	9.31042	0.00219224	expressed protein
LOC_Os03g18630.1	31.9348	23.5242	449.03	555.729	18.1172	5.52e-05	receptor-like kinase RHG1, putative, expressed
LOC_Os03g18640.1	0	0	15.4838	25.138	6599	0.00347739	laccase precursor protein, putative, expressed
LOC_Os03g18850.1	31.9348	9.40967	578.922	643.712	29.5719	3.98e-06	pathogenesis-related Bet v I family protein, putative, expressed
LOC_Os03g19080.1	140.75	151.731	749.244	1015.39	6.03335	0.0159934	expressed protein
LOC_Os03g19120.1	1.18277	2.35242	18.9246	45.787	18.305	0.0172996	MYB family transcription factor, putative, expressed
LOC_Os03g19250.1	2053.29	1872.52	29752.1	13716.4	11.0725	0.000491151	AMP-binding enzyme, putative, expressed
LOC_Os03g19420.2	9.46215	4.70484	5746.21	13561.9	1362.9	4.65e-17	nicotianamine synthase, putative, expressed
LOC_Os03g19427.1	1.18277	0	2637.41	5166.75	6598.21	1.27e-17	nicotianamine synthase, putative, expressed
LOC_Os03g19600.1	9979.02	11403.3	1663.65	1791.08	0.161569	0.0122434	retrotransposon protein, putative, unclassified, expressed
LOC_Os03g19670.1	138.384	94.0967	550.535	857.384	6.05607	0.0167897	GDSL-like lipase/acylhydrolase, putative, expressed
LOC_Os03g19820.1	136.018	241.123	6.88169	4.48892	0.0301495	3.87e-05	expressed protein
LOC_Os03g19990.1	37055	33270.2	6969.43	8080.06	0.213998	0.045759	WD40-like Beta Propeller Repeat family protein, expressed
LOC_Os03g20080.1	0	0	15.4838	15.2623	6599	0.00962157	retrotransposon protein, putative, unclassified, expressed
LOC_Os03g20120.1	29.5692	39.9911	190.107	289.984	6.90179	0.0117474	glycosyl transferase 8 domain containing protein, putative, expressed
LOC_Os03g20210.1	0	0	27.5268	12.569	6599	0.0305643	aspartic proteinase nepenthesin precursor, putative, expressed
LOC_Os03g21400.1	0	0	38.7095	49.3781	6599	4.54e-05	cytochrome P450, putative, expressed
LOC_Os03g21419.1	0	0	42.1503	33.218	6599	0.000242567	retrotransposon protein, putative, Ty1-copia subclass, expressed
LOC_Os03g21480.1	0	0	17.2042	45.787	6599	0.00134187	HAD superfamily phosphatase, putative, expressed
LOC_Os03g21730.1	471.925	509.298	2184.08	2920.49	5.20225	0.029733	receptor-like protein kinase precursor, putative, expressed
LOC_Os03g21970.1	53.2246	57.6342	818.061	934.594	15.8098	9.48e-05	basic helix-loop-helix domain containing protein, expressed
LOC_Os03g22010.1	29.5692	14.1145	91.1824	223.548	7.20476	0.0100189	peroxidase precursor, putative, expressed
LOC_Os03g22020.1	4.73108	0	129.892	258.562	82.1069	3.29e-07	peroxidase precursor, putative, expressed
LOC_Os03g22040.1	73.3317	57.6342	381.934	615.88	7.61888	0.00587091	expressed protein
LOC_Os03g22210.1	244.833	218.775	27.5268	33.218	0.131026	0.00873049	POEI46 - Pollen Ole e I allergen and extensin family protein precursor, expressed
LOC_Os03g22960.1	23.6554	18.8193	340.644	241.504	13.7057	0.000534397	expressed protein
LOC_Os03g24930.1	70.9661	72.925	575.481	262.153	5.82131	0.0259638	tyrosine protein kinase domain containing protein, putative, expressed
LOC_Os03g25120.1	2.36554	3.52863	39.5697	87.0851	21.4882	0.00322184	HSF-type DNA-binding domain containing protein, expressed
LOC_Os03g25270.3	16.5588	11.7621	151.397	75.4139	8.00862	0.0210764	pyrrolidone-carboxylate peptidase, putative, expressed
LOC_Os03g25280.1	50699.4	66424.1	1526.01	1354.76	0.024596	1.24e-07	peroxidase precursor, putative, expressed
LOC_Os03g25300.1	9177.1	11937.3	259.784	254.073	0.0243367	1.27e-07	peroxidase precursor, putative, expressed
LOC_Os03g25320.1	568.912	722.192	18.9246	23.3424	0.0327371	4.31e-06	peroxidase precursor, putative, expressed
LOC_Os03g25340.1	5770.73	6422.1	73.1179	50.2759	0.0101202	3.99e-10	peroxidase precursor, putative, expressed
LOC_Os03g25360.1	234.188	175.255	0	3.59114	0.00877078	5.14e-07	peroxidase precursor, putative, expressed
LOC_Os03g25370.1	208.167	214.07	1.72042	7.18228	0.0210846	9.14e-06	peroxidase precursor, putative, expressed
LOC_Os03g25460.1	809.014	1103.28	54.1933	90.6762	0.0757568	0.00031558	OsRCI2-4 - Putative low temperature and salt responsive protein, expressed
LOC_Os03g25550.1	34.3003	11.7621	159.999	198.41	7.78096	0.0110502	myb-like DNA-binding domain containing protein, putative, expressed
LOC_Os03g25760.1	2228.34	2501.8	246.02	181.352	0.0903511	0.000652541	calmodulin-binding protein, putative, expressed
LOC_Os03g25850.1	7.09661	30.5814	249.461	529.693	20.6793	6.61e-05	expressed protein
LOC_Os03g25869.1	8.27938	1.17621	67.9567	90.6762	16.7766	0.00366066	amino acid permease family protein, putative, expressed
LOC_Os03g27190.1	9.46215	2.35242	45.5912	50.2759	8.11431	0.0222363	ICE-like protease p20 domain containing protein, putative, expressed
LOC_Os03g27480.1	866.97	818.641	69.6771	90.6762	0.0951307	0.00104318	OsSCP14 - Putative Serine Carboxypeptidase homologue, expressed
LOC_Os03g28980.1	92.256	70.5725	557.417	377.07	5.73908	0.0235069	WD40-like Beta Propeller Repeat family protein, expressed
LOC_Os03g28990.1	138.384	114.092	862.792	664.361	6.0487	0.0162083	zinc finger family protein, putative, expressed
LOC_Os03g30060.1	35.4831	23.5242	235.698	168.783	6.85477	0.0218774	expressed protein
LOC_Os03g30250.1	1.18277	2.35242	678.707	876.238	439.848	5.83e-12	COBRA-like protein precursor, putative, expressed
LOC_Os03g30260.1	10.6449	9.40967	387.955	485.701	43.5639	5.71e-07	COBRA-like protein precursor, putative, expressed
LOC_Os03g30950.1	0	1.17621	50.7525	41.2981	78.2604	0.000269432	acyl-desaturase, chloroplast precursor, putative, expressed
LOC_Os03g31260.1	1.18277	0	35.2687	17.9557	44.9998	0.0489558	cysteine-rich receptor-like protein kinase 28 precursor, putative
LOC_Os03g31679.1	16099.9	15369.5	2637.41	4063.37	0.21293	0.0444777	annexin A7, putative, expressed
LOC_Os03g31730.1	227.092	296.405	3074.39	2222.91	10.1191	0.00096066	expressed protein
LOC_Os03g31880.1	20.1071	29.4052	203.01	229.833	8.74212	0.00582978	SHORT-ROOT, putative, expressed
LOC_Os03g32050.1	4257.97	4988.3	634.836	1010.01	0.177893	0.0198736	peroxidase precursor, putative, expressed
LOC_Os03g32180.1	191.609	229.361	19.7849	29.6269	0.117376	0.0106609	polygalacturonase inhibitor 1 precursor, putative, expressed
LOC_Os03g32190.1	115.911	158.788	19.7849	19.7513	0.143925	0.0389256	transposon protein, putative, unclassified, expressed
LOC_Os03g32470.1	0	0	8.60211	24.2402	6599	0.00734699	leucoanthocyanidin dioxygenase, putative, expressed
LOC_Os03g32490.1	462.463	539.88	3058.05	2586.52	5.63138	0.0203273	DUF1230 domain containing protein, expressed
LOC_Os03g36160.1	191.609	210.541	0	1.79557	0.00446492	1.15e-07	DNAJ heat shock N-terminal domain-containing protein, putative, expressed
LOC_Os03g36560.1	14.1932	11.7621	158.279	179.557	13.0161	0.00108001	peroxidase precursor, putative, expressed
LOC_Os03g36650.1	385.583	371.682	33.5482	46.6848	0.105951	0.0036642	cysteine-rich repeat secretory protein 55 precursor, putative, expressed
LOC_Os03g36830.1	1.18277	4.70484	48.1718	61.0493	18.551	0.00717177	expressed protein
LOC_Os03g37140.1	0	4.70484	42.1503	47.5826	19.0725	0.0111511	expressed protein
LOC_Os03g37290.1	1.18277	0	32.688	21.5468	45.8541	0.00627452	cytochrome P450, putative, expressed
LOC_Os03g37830.1	0	1.17621	26.6665	43.0937	59.3094	0.00184129	potassium transporter, putative, expressed
LOC_Os03g37840.1	4.73108	4.70484	55.0535	87.0851	15.0636	0.00205921	potassium transporter, putative, expressed
LOC_Os03g38540.1	7159.3	6730.27	689.029	519.817	0.0870327	0.000443513	folic acid binding protein, putative, expressed
LOC_Os03g38540.2	1062.13	925.676	63.6556	60.1516	0.0622834	9.8e-05	folic acid binding protein, putative, expressed
LOC_Os03g39020.1	292.144	269.352	1343.65	2000.26	5.95537	0.0158419	Kinesin motor domain domain containing protein, expressed
LOC_Os03g40770.1	1.18277	10.5859	92.0426	99.6541	16.2888	0.0014701	expressed protein
LOC_Os03g40800.1	16.5588	25.8766	0	0	0	0.0491519	expressed protein
LOC_Os03g41130.1	94.6215	119.973	0	3.59114	0.0167345	6.74e-05	expressed protein
LOC_Os03g41330.1	0	0	25.8063	21.5468	6599	0.00407459	DUF260 domain containing protein, putative, expressed
LOC_Os03g42200.1	3.54831	3.52863	97.2038	71.8228	23.8842	0.0014107	dof zinc finger domain containing protein, putative, expressed
LOC_Os03g42235.1	44.9452	94.0967	6.02148	9.87563	0.114333	0.0307625	expressed protein
LOC_Os03g42420.1	0	3.52863	77.419	61.9471	39.4959	0.000392935	B3 DNA binding domain containing protein, expressed
LOC_Os03g42569.1	1.18277	0	19.7849	15.2623	29.6315	0.0428163	expressed protein
LOC_Os03g43010.1	3395.73	3546.27	265.805	420.163	0.0988142	0.000944268	expressed protein
LOC_Os03g43400.1	2218.87	2370.06	331.181	435.425	0.167055	0.0156059	OsIAA11 - Auxin-responsive Aux/IAA gene family member, expressed
LOC_Os03g43650.1	1.18277	2.35242	91.1824	161.601	71.505	2.07e-06	uncharacterized protein At4g06744 precursor, putative, expressed
LOC_Os03g44290.1	128.922	131.735	1517.41	1227.27	10.5299	0.000885513	expansin precursor, putative, expressed
LOC_Os03g44810.1	18.9243	17.6431	131.612	160.703	7.99388	0.0121336	expressed protein
LOC_Os03g44890.1	35.4831	36.4625	944.512	1123.13	28.739	2.39e-06	anthranilate phosphoribosyltransferase, putative, expressed
LOC_Os03g45280.1	332.358	423.435	2049.02	2108	5.50021	0.0228718	dehydrin, putative, expressed
LOC_Os03g45750.1	21.2898	7.05725	71.3975	134.668	7.26936	0.0320969	DUF260 domain containing protein, putative, expressed
LOC_Os03g45920.1	41466.7	41931.9	7521.69	9705.05	0.206559	0.0388113	tubulin/FtsZ domain containing protein, putative, expressed
LOC_Os03g46150.1	2.36554	0	123.01	271.131	166.618	5.63e-08	LTPL72 - Protease inhibitor/seed storage/LTP family protein precursor, expressed
LOC_Os03g46150.2	0	0	32.688	69.1294	6599	5.25e-05	LTPL72 - Protease inhibitor/seed storage/LTP family protein precursor, expressed
LOC_Os03g46200.1	2.36554	19.9956	414.622	107.734	23.36	0.000105369	acetyltransferase, GNAT family, putative, expressed
LOC_Os03g46454.1	17.7415	9.40967	191.827	267.54	16.9188	0.000593699	metal cation transporter, putative, expressed
LOC_Os03g46860.1	24.8381	23.5242	1.72042	1.79557	0.072701	0.024433	helix-loop-helix DNA-binding protein, putative, expressed
LOC_Os03g46920.1	67.4178	51.7532	732.9	1056.69	15.017	0.000116437	expressed protein
LOC_Os03g47010.1	435.259	516.356	43.8708	121.201	0.173465	0.0222747	glycosyl hydrolase family 10 protein, putative, expressed
LOC_Os03g47016.1	3.54831	0	27.5268	46.6848	20.9146	0.0282387	homeobox protein knotted-1-like 10, putative, expressed
LOC_Os03g47470.1	5.91384	7.05725	56.7739	69.1294	9.70645	0.0251556	STE_PAK_Ste20_STLK.4 - STE kinases include homologs to sterile 7, sterile 11 and sterile 20 from yeast, expressed
LOC_Os03g47610.1	430.528	359.92	3223.21	2415.94	7.13412	0.00620963	thiamine biosynthesis protein thiC, putative, expressed
LOC_Os03g47610.8	1.18277	1.17621	30.9676	43.9914	31.7761	0.0050413	thiamine biosynthesis protein thiC, putative, expressed
LOC_Os03g47730.1	15.376	11.7621	129.032	147.237	10.1801	0.00400646	homeobox domain containing protein, expressed
LOC_Os03g47810.1	0	0	11.1827	15.2623	6599	0.0134719	nodulin family protein, putative, expressed
LOC_Os03g47940.1	664.716	559.875	8533.29	8182.41	13.65	0.00014708	GDSL-like lipase/acylhydrolase, putative, expressed
LOC_Os03g48235.1	0	0	48.1718	80.8006	6599	2.32e-05	expressed protein
LOC_Os03g48570.1	0	2.35242	27.5268	44.8892	30.7836	0.0132081	expressed protein
LOC_Os03g48810.1	35.4831	19.9956	866.233	1000.13	33.6411	1.07e-06	nucleobase-ascorbate transporter, putative, expressed
LOC_Os03g49050.1	0	0	19.7849	22.4446	6599	0.0100282	possible lysine decarboxylase domain containing protein, expressed
LOC_Os03g49350.1	81.6111	138.793	683.008	625.756	5.93803	0.0178059	lipozygenase protein, putative, expressed
LOC_Os03g49440.1	4654.2	4942.43	393.116	348.34	0.0772622	0.000221369	phosphatase, putative, expressed
LOC_Os03g49630.1	15.376	19.9956	327.74	579.071	25.6367	1.17e-05	expressed protein
LOC_Os03g49880.1	2.36554	0	530.75	544.955	454.74	4.59e-11	TCP family transcription factor, putative, expressed
LOC_Os03g50140.1	0	1.17621	516.127	564.706	918.912	1.31e-11	plastocyanin-like domain containing protein, putative, expressed
LOC_Os03g50420.1	8.27938	5.88104	101.505	126.588	16.1077	0.00066538	expressed protein
LOC_Os03g51110.1	2.36554	0	174.623	237.015	174.015	5.76e-08	MYB family transcription factor, putative, expressed
LOC_Os03g51230.1	294.509	271.704	1343.65	1468.78	4.96707	0.0379906	SNF2 family N-terminal domain containing protein, expressed
LOC_Os03g51230.2	10.6449	16.4669	154.838	89.7785	9.02249	0.0109962	SNF2 family N-terminal domain containing protein, expressed
LOC_Os03g51350.1	29.5692	29.4052	0	1.79557	0.0304466	0.00252824	expressed protein
LOC_Os03g51690.1	0	0	230.537	296.269	6599	3.67e-10	Homeobox domain containing protein, expressed
LOC_Os03g51980.1	2.36554	1.17621	10.3225	43.0937	15.0819	0.020978	expressed protein
LOC_Os03g52010.1	60.3212	32.9339	830.964	908.558	18.6534	4.08e-05	lecithin cholesterol acyltransferase, putative, expressed
LOC_Os03g52070.1	81.6111	54.1056	750.104	1225.48	14.5566	0.000134579	OsSCP20 - Putative Serine Carboxypeptidase homologue, expressed
LOC_Os03g52320.1	3.54831	0	480.858	611.391	307.823	1.18e-10	GRF-interacting factor 1, putative, expressed
LOC_Os03g52360.1	26.0209	31.7576	0	0	0	0.0102838	PIII3 - Proteinase inhibitor II family protein precursor, putative, expressed
LOC_Os03g52650.1	127.739	65.8677	652.9	932.798	8.1903	0.00355113	syntaxin-related protein, putative, expressed
LOC_Os03g52860.1	581.922	1049.18	32.688	0.897785	0.0205909	9.49e-08	lipoxygenase, putative, expressed
LOC_Os03g52910.1	15.376	8.23346	298.493	345.647	27.2831	1.36e-05	uncharacterized UPF0114 domain containing protein, expressed
LOC_Os03g53150.1	26622.9	33571.4	1970.74	2536.24	0.0748739	0.000164312	OsIAA13 - Auxin-responsive Aux/IAA gene family member, expressed
LOC_Os03g53580.1	14.1932	11.7621	128.171	136.463	10.1958	0.00381486	expressed protein
LOC_Os03g53660.1	2267.37	2645.29	292.472	413.879	0.143782	0.00737843	Myosin head domain containing protein, expressed
LOC_Os03g53690.1	24.8381	10.5859	221.074	403.105	17.6202	7.67e-05	oxidoreductase, short chain dehydrogenase/reductase family domain containing protein, expressed
LOC_Os03g53860.2	26.0209	29.4052	140.214	210.082	6.32005	0.0234101	periplasmic beta-glucosidase precursor, putative, expressed
LOC_Os03g53860.3	46.128	35.2863	273.547	246.891	6.39247	0.0171981	periplasmic beta-glucosidase precursor, putative, expressed
LOC_Os03g54000.1	1632.22	1587.88	9174.15	7562.94	5.19769	0.0283409	oligopeptide transporter, putative, expressed
LOC_Os03g54130.1	0	0	6.02148	16.1601	6599	0.0224822	cysteine protease 1 precursor, putative, expressed
LOC_Os03g54910.1	445.904	434.021	1649.02	2652.06	4.88801	0.04024	X8 domain containing protein, expressed
LOC_Os03g55010.1	16.5588	12.9383	167.741	140.952	10.4652	0.00381486	UDP-glucoronosyl and UDP-glucosyl transferase domain containing protein, expressed
LOC_Os03g55020.1	15.376	9.40967	160.859	101.45	10.5831	0.00936673	UDP-glucoronosyl and UDP-glucosyl transferase domain containing protein, expressed
LOC_Os03g55030.1	0	0	24.9461	17.0579	6599	0.0181664	UDP-glucoronosyl and UDP-glucosyl transferase domain containing protein, expressed
LOC_Os03g55100.1	10.6449	9.40967	274.407	540.466	40.6328	9.92e-07	cyclic nucleotide-gated ion channel 2, putative, expressed
LOC_Os03g55220.1	1.18277	10.5859	77.419	78.1073	13.2153	0.00520103	bHelix-loop-helix transcription factor, putative, expressed
LOC_Os03g55250.1	7.09661	0	181.505	70.925	35.5704	0.000102197	cytochrome P450 81E1, putative, expressed
LOC_Os03g55530.1	0	8.23346	77.419	117.61	23.6873	0.000705601	HLS, putative, expressed
LOC_Os03g55610.1	1.18277	2.35242	99.7845	116.712	61.2405	2.37e-05	dof zinc finger domain containing protein, putative, expressed
LOC_Os03g55760.1	11.8277	12.9383	129.032	113.121	9.77762	0.00585442	MYB family transcription factor, putative, expressed
LOC_Os03g55850.1	31415.5	31075.4	6957.39	6307.83	0.212274	0.0446715	cold acclimation protein WCOR413, putative, expressed
LOC_Os03g56050.1	2.36554	11.7621	145.376	136.463	19.9495	0.000500469	AP2-like ethylene-responsive transcription factor AINTEGUMENTA, putative, expressed
LOC_Os03g56070.1	29.5692	28.229	293.332	535.08	14.3328	0.000227427	expressed protein
LOC_Os03g56370.1	0	0	285.59	374.376	6599	1.81e-10	methyltransferase, putative, expressed
LOC_Os03g56500.1	0	0	169.462	64.6405	6599	6e-07	expressed protein
LOC_Os03g56580.1	2.36554	1.17621	24.0859	22.4446	13.1377	0.0358611	no apical meristem protein, putative, expressed
LOC_Os03g56700.1	18.9243	15.2907	152.257	245.993	11.6396	0.0014957	expressed protein
LOC_Os03g56820.1	21608	22849	3066.65	3662.96	0.151373	0.00872294	fatty acid hydroxylase, putative, expressed
LOC_Os03g56820.2	4241.41	4481.36	511.826	723.614	0.141634	0.00658607	fatty acid hydroxylase, putative, expressed
LOC_Os03g57010.1	0	0	28.387	13.4668	6599	0.0266271	expressed protein
LOC_Os03g57050.1	3.54831	2.35242	36.1289	55.6626	15.556	0.0114731	expressed protein
LOC_Os03g57080.1	11.8277	5.88104	130.752	79.9028	11.8955	0.003554	PLA IIIA/PLP7, putative, expressed
LOC_Os03g57200.1	9.46215	9.40967	115.268	81.6984	10.4371	0.00800263	glutathione S-transferase, putative, expressed
LOC_Os03g57220.1	727.403	541.056	4415.46	4074.15	6.69285	0.00840712	hydroxyacid oxidase 1, putative, expressed
LOC_Os03g57240.1	29.5692	32.9339	184.945	237.015	6.75104	0.0146072	ZOS3-19 - C2H2 zinc finger protein, expressed
LOC_Os03g57950.1	8.27938	11.7621	154.838	207.388	18.0738	0.000228716	type I inositol-1,4,5-trisphosphate 5-phosphatase, putative, expressed
LOC_Os03g57970.1	37.8486	77.6298	303.654	671.543	8.44485	0.00362659	LTPL73 - Protease inhibitor/seed storage/LTP family protein precursor, expressed
LOC_Os03g57980.1	2.36554	4.70484	36.1289	103.245	19.7124	0.00124801	LTPL99 - Protease inhibitor/seed storage/LTP family protein precursor, expressed
LOC_Os03g57990.1	3.54831	1.17621	49.032	77.2095	26.7205	0.000933171	LTPL74 - Protease inhibitor/seed storage/LTP family protein precursor, expressed
LOC_Os03g58490.1	1864.04	2057.19	238.278	232.526	0.120065	0.00309822	DUF593 domain containing protein, expressed
LOC_Os03g58580.1	130.105	144.674	1150.96	1120.44	8.26629	0.00329187	nodulin, putative, expressed
LOC_Os03g58850.1	1.18277	10.5859	212.472	266.642	40.7111	8.04e-06	uncharacterized PE-PGRS family protein PE_PGRS3 precursor, putative, expressed
LOC_Os03g58870.1	3.54831	14.1145	92.9028	93.3696	10.546	0.010196	expressed protein
LOC_Os03g58900.1	61.504	90.5681	483.439	573.684	6.95146	0.00927108	galactosyltransferase family protein, putative, expressed
LOC_Os03g59320.1	250.747	155.26	1238.7	1177	5.9499	0.0168289	expressed protein
LOC_Os03g59430.2	1582.54	1761.96	88.6017	84.3917	0.0517247	2.37e-05	uncharacterized glycosyltransferase, putative, expressed
LOC_Os03g59440.1	4071.09	4396.67	18.9246	102.347	0.0143216	4.27e-09	dirigent, putative, expressed
LOC_Os03g60430.1	175.05	154.083	812.039	776.584	4.82669	0.0453152	AP2 domain containing protein, expressed
LOC_Os03g60480.1	79.2455	130.559	2678.7	1952.68	22.0747	8.85e-06	heavy metal-associated domain containing protein, expressed
LOC_Os03g60720.1	120.642	94.0967	685.588	1413.11	9.77326	0.00137718	expansin precursor, putative, expressed
LOC_Os03g60840.1	857.507	825.699	119.569	126.588	0.146243	0.00956384	BBTI13 - Bowman-Birk type bran trypsin inhibitor precursor, expressed
LOC_Os03g61150.1	3787.23	2960.52	504.084	279.211	0.116082	0.00240932	expressed protein
LOC_Os03g61150.2	281.499	239.947	41.2901	23.3424	0.123949	0.00750461	expressed protein
LOC_Os03g61160.1	852.776	709.254	61.075	50.2759	0.071286	0.000248978	expressed protein
LOC_Os03g61160.3	72.1489	38.8149	5.16127	3.59114	0.0788762	0.030574	expressed protein
LOC_Os03g61470.1	192.791	266.999	53.3331	15.2623	0.149188	0.0270823	uncharacterized Cys-rich domain containing protein, putative, expressed
LOC_Os03g61720.1	14.1932	7.05725	36.1289	91.574	6.00941	0.0398423	glycerol-3-phosphate acyltransferase, putative, expressed
LOC_Os03g62200.1	249.564	116.445	1031.39	1051.31	5.69029	0.0214101	ammonium transporter protein, putative, expressed
LOC_Os03g62270.1	100.535	77.6298	540.213	669.747	6.79123	0.0112948	MATE efflux family protein, putative, expressed
LOC_Os03g63200.1	55.5901	23.5242	0	0	0	0.00146139	powdery mildew resistance protein PM3b, putative, expressed
LOC_Os03g64150.1	22.4726	24.7004	215.053	101.45	6.7094	0.0252099	MATE efflux family protein, putative, expressed
LOC_Os03g64340.1	753.424	859.809	49.8922	130.179	0.111621	0.0025504	heavy metal-associated domain containing protein, expressed
LOC_Os04g01354.1	109.998	84.687	13.7634	7.18228	0.107588	0.0277916	chalcone synthase, putative, expressed
LOC_Os04g01500.1	2366.72	3408.65	574.621	630.245	0.208621	0.0429981	expressed protein
LOC_Os04g01610.1	17.7415	22.348	302.794	381.558	17.0706	0.000134116	expressed protein
LOC_Os04g02640.1	512.139	167.022	28.387	76.3117	0.154159	0.0152738	3-ketoacyl-CoA synthase 6, putative, expressed
LOC_Os04g04330.1	10.6449	3.52863	313.117	322.305	44.8315	1.56e-06	receptor-like protein kinase 2 precursor, putative, expressed
LOC_Os04g04640.1	0	0	15.4838	21.5468	6599	0.030574	decarboxylase, putative, expressed
LOC_Os04g05010.1	80.4283	72.925	588.384	405.799	6.48296	0.0142492	CBS domain containing membrane protein, putative, expressed
LOC_Os04g05070.1	7.09661	0	49.032	67.3338	16.3974	0.00689129	expressed protein
LOC_Os04g08350.1	3279.82	3670.95	474.836	785.561	0.181332	0.0216768	cysteine synthase, chloroplast/chromoplast precursor, putative, expressed
LOC_Os04g08350.2	418.7	514.003	61.075	110.427	0.183877	0.0296489	cysteine synthase, chloroplast/chromoplast precursor, putative, expressed
LOC_Os04g08550.1	2.36554	2.35242	22.3655	42.1959	13.6842	0.0259055	oxidoreductase, aldo/keto reductase family protein, putative, expressed
LOC_Os04g09260.1	52.0418	55.2818	5.16127	3.59114	0.0815515	0.0453052	transferase family protein, putative, expressed
LOC_Os04g09590.1	27.2037	23.5242	210.752	189.433	7.88884	0.00898944	transferase family protein, putative, expressed
LOC_Os04g09800.1	21.2898	14.1145	86.0211	154.419	6.79126	0.0256253	SWI/SNF-related matrix-associated actin-dependent regulator of chromatin subfamily A, putative, expressed
LOC_Os04g09900.1	0	0	47.3116	64.6405	6599	9.91e-06	ent-kaurene synthase, chloroplast precursor, putative, expressed
LOC_Os04g09920.1	0	0	29.2472	48.4804	6599	0.000122569	cytochrome P450, putative, expressed
LOC_Os04g10750.1	0	2.35242	69.6771	104.143	73.89	6.81e-05	inorganic phosphate transporter, putative, expressed
LOC_Os04g11400.1	3.54831	5.88104	74.8384	81.6984	16.601	0.00169217	expressed protein
LOC_Os04g11400.2	0	2.35242	17.2042	30.5247	20.2893	0.028691	expressed protein
LOC_Os04g11970.1	42.5797	22.348	265.805	473.132	11.3809	0.000755785	O-methyltransferase, putative, expressed
LOC_Os04g14690.1	4405.81	4295.52	78.2792	82.5962	0.0184886	2.43e-08	flavin-containing monooxygenase family protein, putative, expressed
LOC_Os04g14810.1	0	0	8.60211	26.9335	6599	0.0118267	3-5 exonuclease domain-containing protein, putative, expressed
LOC_Os04g15690.1	86.3421	44.6959	416.342	522.511	7.16473	0.00789311	DSBA-like thioredoxin domain containing protein, expressed
LOC_Os04g15800.1	22.4726	32.9339	392.256	619.471	18.2601	5.47e-05	expressed protein
LOC_Os04g15840.1	3399.28	4456.66	171.182	203.797	0.047732	1.15e-05	expansin precursor, putative, expressed
LOC_Os04g16970.1	2.36554	2.35242	26.6665	74.5161	21.4463	0.00149681	zinc finger, C3HC4 type domain containing protein, expressed
LOC_Os04g19140.1	4.73108	4.70484	209.031	286.393	52.5042	1.3e-06	expressed protein
LOC_Os04g19740.1	2.36554	4.70484	29.2472	43.0937	10.2315	0.0183795	transketolase, chloroplast precursor, putative, expressed
LOC_Os04g22380.1	2.36554	1.17621	49.032	70.925	33.8694	0.000944268	short chain dehydrogenase/reductase protein, putative, expressed
LOC_Os04g23140.1	248.381	275.233	33.5482	28.7291	0.118937	0.00852653	expressed protein
LOC_Os04g23220.1	22.4726	7.05725	194.408	272.029	15.7954	0.000381612	expressed protein
LOC_Os04g23550.2	165.588	239.947	35.2687	29.6269	0.160025	0.0361177	basic helix-loop-helix family protein, putative, expressed
LOC_Os04g24110.1	23.6554	30.5814	257.203	341.158	11.0324	0.00135331	anthocyanin 3-O-beta-glucosyltransferase, putative, expressed
LOC_Os04g24850.1	0	2.35242	79.9996	61.9471	60.3408	0.00042456	cytokinin-O-glucosyltransferase 2, putative, expressed
LOC_Os04g25800.1	0	2.35242	44.731	52.0715	41.1502	0.00481313	cytokinin-O-glucosyltransferase 2, putative, expressed
LOC_Os04g25900.1	1372.01	1603.17	30.9676	67.3338	0.0330404	1.61e-06	go35 NBS-LRR, putative, expressed
LOC_Os04g26360.1	1.18277	2.35242	36.9891	26.0358	17.8279	0.0225613	transposon protein, putative, CACTA, En/Spm sub-class
LOC_Os04g27190.1	0	5.88104	167.741	79.9028	42.1088	6.11e-05	terpene synthase, putative, expressed
LOC_Os04g28410.1	43.7625	59.9867	1.72042	5.38671	0.068503	0.0364441	expressed protein
LOC_Os04g28520.1	2.36554	0	269.246	589.844	363.169	1.35e-10	male sterility protein, putative, expressed
LOC_Os04g28580.1	94.6215	69.3963	4.30106	5.38671	0.0590653	0.00223626	transposon protein, putative, unclassified, expressed
LOC_Os04g28620.1	0	0	64.5158	296.269	6599	2.77e-09	male sterility protein, putative, expressed
LOC_Os04g28830.1	3.54831	0	26.6665	35.9114	17.636	0.0235108	RALFL34 - Rapid ALkalinization Factor RALF family protein precursor, putative, expressed
LOC_Os04g29000.1	62.6868	72.925	0	1.79557	0.0132405	1.76e-05	sulfotransferase domain containing protein, expressed
LOC_Os04g29030.1	0	0	32.688	17.9557	6599	0.0106078	dehydrogenase, putative, expressed
LOC_Os04g29090.1	0	0	36.9891	12.569	6599	0.000841	FAD-binding and arabino-lactone oxidase domains containing protein, putative, expressed
LOC_Os04g29550.1	0	0	61.075	116.712	6599	3.28e-06	RIPER2 - Ripening-related family protein precursor, expressed
LOC_Os04g29580.1	0	4.70484	41.2901	38.6047	16.9814	0.01386	OsWAK37 - OsWAK short gene, expressed
LOC_Os04g30010.1	4.73108	0	78.2792	87.9829	35.1426	0.000362576	OsWAK45 - OsWAK receptor-like protein kinase, expressed
LOC_Os04g30030.1	8.27938	8.23346	96.3436	113.121	12.6849	0.00684421	cysteine-rich receptor-like protein kinase 12 precursor, putative, expressed
LOC_Os04g30160.1	11.8277	4.70484	398.278	302.553	42.391	1.3e-06	OsWAK46 - OsWAK receptor-like protein kinase, expressed
LOC_Os04g30240.1	2.36554	0	165.161	156.215	135.857	1.3e-06	OsWAK60 - OsWAK receptor-like protein kinase, expressed
LOC_Os04g30770.1	2.36554	14.1145	84.3007	111.325	11.8705	0.00356592	glycosyl hydrolase, putative, expressed
LOC_Os04g31290.1	2.36554	3.52863	269.246	281.007	93.3555	2.52e-07	helix-loop-helix DNA-binding domain containing protein, expressed
LOC_Os04g31484.1	1.18277	2.35242	47.3116	105.939	43.35	0.000170458	RALFL20 - Rapid ALkalinization Factor RALF family protein precursor, expressed
LOC_Os04g32010.1	65.0523	49.4008	3.44084	8.97785	0.108505	0.011277	thiamine pyrophosphate enzyme, C-terminal TPP binding domain containing protein, expressed
LOC_Os04g32480.1	3.54831	4.70484	115.268	48.4804	19.8408	0.00205536	zinc-finger protein, putative, expressed
LOC_Os04g32510.1	3.54831	9.40967	84.3007	52.9693	10.5935	0.0145077	expressed protein
LOC_Os04g32860.1	1.18277	0	16.344	15.2623	26.7223	0.0326643	expressed protein
LOC_Os04g33115.1	210.533	281.114	62.7954	19.7513	0.167898	0.0315237	expressed protein
LOC_Os04g33560.1	1.18277	14.1145	192.687	239.708	28.2662	2.17e-05	expressed protein
LOC_Os04g33590.2	47.3108	49.4008	0	3.59114	0.0371325	0.0117297	hydrolase, alpha/beta fold family protein, putative, expressed
LOC_Os04g33670.1	18.9243	28.229	159.139	197.513	7.56366	0.0134502	expressed protein
LOC_Os04g33680.1	21.2898	16.4669	266.665	332.18	15.8606	0.00019992	glutaredoxin, putative, expressed
LOC_Os04g33870.1	2.36554	4.70484	61.9352	81.6984	20.3149	0.00199093	DUF623 domain containing protein, expressed
LOC_Os04g34230.1	0	0	18.0644	15.2623	6599	0.0412958	RING-H2 finger protein, putative, expressed
LOC_Os04g34270.1	86.3421	88.2157	325.16	579.969	5.18527	0.0406784	serine/threonine-protein kinase receptor precursor, putative, expressed
LOC_Os04g34540.1	8.27938	5.88104	52.4729	65.5383	8.33387	0.041309	expressed protein
LOC_Os04g34600.1	4.73108	7.05725	151.397	404.003	47.1144	6.52e-07	abscisic stress-ripening, putative, expressed
LOC_Os04g34630.1	0	0	18.9246	8.97785	6599	0.0325033	peroxidase precursor, putative, expressed
LOC_Os04g35270.1	361.927	330.515	53.3331	35.9114	0.128884	0.0087039	alpha-1,4-fucosyltransferase, putative, expressed
LOC_Os04g35280.1	16.5588	19.9956	157.419	140.054	8.13783	0.0092886	neutral/alkaline invertase, putative, expressed
LOC_Os04g35430.1	8.27938	10.5859	216.773	168.783	20.4374	0.000114173	PHD-finger domain containing protein, expressed
LOC_Os04g35739.1	0	0	23.2257	22.4446	6599	0.0444561	retrotransposon protein, putative, Ty1-copia subclass, expressed
LOC_Os04g35750.1	4.73108	0	117.849	106.836	47.4914	6.16e-05	expressed protein
LOC_Os04g35810.1	4.73108	1.17621	47.3116	45.787	15.76	0.0161053	expressed protein
LOC_Os04g35890.1	2.36554	0	206.451	183.148	164.698	1.27e-07	TKL_IRAK_CR4L.3 - The CR4L subfamily has homology with Crinkly4, expressed
LOC_Os04g36070.1	29.5692	47.0484	294.192	426.448	9.40567	0.00288079	OsRR1 type-A response regulator, expressed
LOC_Os04g36670.1	14.1932	18.8193	180.644	149.032	9.98639	0.00390276	expressed protein
LOC_Os04g37550.1	30.752	30.5814	350.966	562.013	14.8855	0.000195186	aspartic proteinase nepenthesin-2 precursor, putative, expressed
LOC_Os04g37680.1	5.91384	5.88104	34.4084	76.3117	9.38713	0.0305643	alpha/beta hydrolase fold, putative, expressed
LOC_Os04g38220.1	2.36554	4.70484	89.4619	254.971	48.7149	2.75e-06	transporter family protein, putative, expressed
LOC_Os04g38270.1	70.9661	81.1584	9.46232	6.28449	0.103513	0.027372	expressed protein
LOC_Os04g38470.1	8.27938	17.6431	144.515	92.4718	9.14214	0.00953718	expressed protein
LOC_Os04g38540.1	21.2898	2.35242	159.139	75.4139	9.92092	0.0102095	aldose 1-epimerase, putative, expressed
LOC_Os04g38740.1	14.1932	21.1718	409.46	381.558	22.3673	3.21e-05	MYB family transcription factor, putative, expressed
LOC_Os04g38810.1	27.2037	24.7004	305.375	453.381	14.6184	0.000249759	formin, putative, expressed
LOC_Os04g39010.1	0	1.17621	46.4514	23.3424	59.3379	0.0087457	heavy metal associated domain containing protein, expressed
LOC_Os04g39160.1	13.0105	8.23346	104.946	122.996	10.7298	0.00327976	RNA-dependent RNA polymerase, putative, expressed
LOC_Os04g39320.1	14.1932	7.05725	1138.06	891.5	95.5065	3.24e-09	expressed protein
LOC_Os04g39320.2	1.18277	0	97.2038	75.4139	145.944	2.75e-05	expressed protein
LOC_Os04g39320.4	1.18277	0	31.8278	15.2623	39.8135	0.0485221	expressed protein
LOC_Os04g39370.1	593.75	608.1	109.247	92.4718	0.16784	0.0227601	heavy metal associated domain containing protein, expressed
LOC_Os04g40530.1	0	1.17621	164.3	206.49	315.242	9.17e-08	methyltransferase domain containing protein, expressed
LOC_Os04g41280.1	66.2351	72.925	338.923	510.839	6.10637	0.0191072	ankyrin repeat domain containing protein, expressed
LOC_Os04g41640.1	0	0	27.5268	17.9557	6599	0.00242283	HEV2 - Hevein family protein precursor, expressed
LOC_Os04g41680.1	0	0	26.6665	26.9335	6599	0.0068836	CHIT3 - Chitinase family protein precursor, expressed
LOC_Os04g41870.1	9.46215	2.35242	143.655	190.33	28.269	5.97e-05	expressed protein
LOC_Os04g41875.1	1.18277	4.70484	53.3331	52.9693	18.0553	0.00823921	oxidoreductase, short chain dehydrogenase/reductase domain containing protein, expressed
LOC_Os04g41900.1	460.097	294.052	2508.38	3586.65	8.08199	0.00322369	expressed protein
LOC_Os04g41970.1	27909.8	28674.8	2965.15	4472.76	0.131448	0.00408886	endoglucanase, putative, expressed
LOC_Os04g42520.1	14.1932	22.348	670.104	776.584	39.5906	6.05e-07	phosphoribosyl transferase, putative, expressed
LOC_Os04g42520.2	0	0	49.032	34.1158	6599	0.00044186	phosphoribosyl transferase, putative, expressed
LOC_Os04g42540.1	11.8277	10.5859	110.107	166.988	12.3628	0.00149492	expressed protein
LOC_Os04g42720.1	17.7415	14.1145	75.6986	127.485	6.37819	0.0295827	TMS membrane protein/tumour differentially expressed protein, putative, expressed
LOC_Os04g42860.1	1289.22	916.267	12910.9	13629.3	12.0337	0.000313451	GDSL-like lipase/acylhydrolase, putative, expressed
LOC_Os04g43060.1	0	2.35242	238.278	175.068	175.711	1.25e-07	enzyme of the cupin superfamily protein, putative, expressed
LOC_Os04g43560.1	48.4935	71.7487	407.74	702.965	9.23723	0.00239926	no apical meristem protein, putative, expressed
LOC_Os04g43580.1	0	0	80.8598	170.579	6599	1.61e-07	DUF640 domain containing protein, putative, expressed
LOC_Os04g44120.1	8.27938	8.23346	53.3331	140.054	11.7113	0.00340361	collagen triple helix repeat, putative, expressed
LOC_Os04g44130.1	0	0	38.7095	34.1158	6599	0.000648983	DEF12 - Defensin and Defensin-like DEFL family, expressed
LOC_Os04g44230.1	2.36554	1.17621	27.5268	67.3338	26.7836	0.00797832	cytokinin dehydrogenase precursor, putative, expressed
LOC_Os04g44280.1	0	0	25.8063	17.0579	6599	0.00656877	OsRR5 type-A response regulator, expressed
LOC_Os04g44410.1	34.3003	54.1056	848.168	662.565	17.0886	7.15e-05	OsSCP25 - Putative Serine Carboxypeptidase homologue, expressed
LOC_Os04g44460.1	0	0	11.1827	17.9557	6599	0.0158337	sulfotransferase domain containing protein, expressed
LOC_Os04g44500.1	4094.75	4447.25	670.965	369.887	0.121851	0.00313495	GEM, putative, expressed
LOC_Os04g44510.1	11700	13604	2315.69	2175.33	0.177483	0.0195823	GEM, putative, expressed
LOC_Os04g44640.1	24.8381	21.1718	215.913	322.305	11.6979	0.0010412	ulp1 protease family, C-terminal catalytic domain containing protein, expressed
LOC_Os04g44780.1	74.5144	67.0439	270.966	564.706	5.90338	0.0225172	beta-expansin precursor, putative, expressed
LOC_Os04g44840.1	1529.32	1269.13	282.149	293.576	0.20573	0.0425383	glycosyl hydrolase family 3 protein, putative, expressed
LOC_Os04g45000.1	4.73108	0	98.0641	122.996	46.7252	1.07e-05	short-chain dehydrogenase/reductase, putative, expressed
LOC_Os04g45000.2	0	0	14.6236	32.3202	6599	0.00176173	short-chain dehydrogenase/reductase, putative, expressed
LOC_Os04g45140.1	26.0209	44.6959	364.729	431.834	11.2641	0.000977671	DTA2, putative, expressed
LOC_Os04g45210.1	104.084	35.2863	503.223	704.761	8.66747	0.00323266	peroxisomal biogenesis factor 11, putative, expressed
LOC_Os04g45330.1	50.8591	51.7532	1331.61	1319.74	25.8385	4.34e-06	YABBY domain containing protein, putative, expressed
LOC_Os04g45510.1	352.465	264.647	0	0	0	1.42e-10	expressed protein
LOC_Os04g45520.1	82.7938	52.9294	0	0	0	4.23e-05	integral membrane protein, putative, expressed
LOC_Os04g46060.1	3.54831	4.70484	101.505	147.237	30.139	7.29e-05	WRKY36, expressed
LOC_Os04g46110.1	62.6868	171.727	705.373	591.64	5.53302	0.0251285	fibroin heavy chain precursor, putative, expressed
LOC_Os04g46120.1	0	0	13.7634	24.2402	6599	0.0216768	plastocyanin-like domain containing protein, putative, expressed
LOC_Os04g46130.1	0	0	86.0211	276.518	6599	2.49e-09	plastocyanin-like domain containing protein, putative, expressed
LOC_Os04g46280.1	2351.34	2749.98	479.138	515.328	0.194943	0.0313408	hydrolase, NUDIX family, domain containing protein, expressed
LOC_Os04g46630.1	0	2.35242	826.663	1676.16	1063.94	8.98e-14	expansin precursor, putative, expressed
LOC_Os04g46650.1	111.18	88.2157	6.88169	16.1601	0.115558	0.0269409	expansin precursor, putative, expressed
LOC_Os04g46740.1	16.5588	4.70484	461.073	457.87	43.2167	4.24e-07	pectinesterase, putative, expressed
LOC_Os04g46740.2	7.09661	2.35242	73.1179	129.281	21.4201	0.000223972	pectinesterase, putative, expressed
LOC_Os04g46810.1	49.6763	10.5859	0	5.38671	0.0893879	0.0137249	LTPL120 - Protease inhibitor/seed storage/LTP family protein precursor, expressed
LOC_Os04g46940.1	34.3003	32.9339	414.622	835.837	18.5986	4.49e-05	copper-transporting ATPase 3, putative, expressed
LOC_Os04g46990.1	2.36554	0	84.3007	114.019	83.8369	9e-06	cis-zeatin O-glucosyltransferase, putative, expressed
LOC_Os04g47360.1	2265	2759.39	135.053	174.17	0.0615445	6.24e-05	OsPOP9 - Putative Prolyl Oligopeptidase homologue, expressed
LOC_Os04g47420.1	2.36554	8.23346	158.279	187.637	32.6366	3.03e-05	transmembrane amino acid transporter protein, putative, expressed
LOC_Os04g47580.1	81.6111	39.9911	422.364	582.662	8.26487	0.00378307	cyclin, putative, expressed
LOC_Os04g47770.1	7.09661	0	88.6017	173.272	36.9013	6.26e-05	cis-zeatin O-glucosyltransferase, putative, expressed
LOC_Os04g47840.1	0	0	24.0859	26.9335	6599	0.00250881	expressed protein
LOC_Os04g47890.1	4.73108	1.17621	34.4084	50.2759	14.3356	0.0113917	MYB family transcription factor, putative, expressed
LOC_Os04g48070.1	4.73108	4.70484	35.2687	53.8671	9.44643	0.0196287	homeobox and START domains containing protein, putative, expressed
LOC_Os04g48170.1	1046.75	1171.5	29.2472	27.8313	0.0257313	5.19e-07	cytochrome P450, putative, expressed
LOC_Os04g48200.1	27.2037	19.9956	370.751	234.322	12.8195	0.000375473	cytochrome P450, putative, expressed
LOC_Os04g48210.1	0	0	12.9032	8.97785	6599	0.0153009	cytochrome P450, putative, expressed
LOC_Os04g48490.1	295.692	382.268	2578.05	2964.48	8.17531	0.00313211	fasciclin-like arabinogalactan protein, putative, expressed
LOC_Os04g48760.1	217.629	168.198	2132.46	2487.76	11.9748	0.0003677	leucine-rich repeat family protein, putative, expressed
LOC_Os04g48850.1	315.799	434.021	43.0106	63.7427	0.142372	0.0121639	aminotransferase, classes I and II, domain containing protein, expressed
LOC_Os04g48930.1	0	0	23.2257	46.6848	6599	0.00141637	ferric-chelate reductase, putative, expressed
LOC_Os04g49160.1	16.5588	16.4669	284.73	352.829	19.3049	6.29e-05	zinc finger, C3HC4 type domain containing protein, expressed
LOC_Os04g49194.1	14.1932	7.05725	152.257	126.588	13.1218	0.00327259	naringenin,2-oxoglutarate 3-dioxygenase, putative, expressed
LOC_Os04g49210.1	0	5.88104	245.16	137.361	65.0431	6.01e-07	naringenin,2-oxoglutarate 3-dioxygenase, putative, expressed
LOC_Os04g49440.3	15.376	21.1718	147.096	134.668	7.70947	0.0207385	RNA recognition motif containing protein, putative, expressed
LOC_Os04g49450.1	195.157	218.775	2514.4	2451.85	11.9977	0.000388283	MYB family transcription factor, putative, expressed
LOC_Os04g49450.2	2.36554	2.35242	80.8598	74.5161	32.9329	0.00168451	MYB family transcription factor, putative, expressed
LOC_Os04g49620.1	42.5797	43.5197	256.343	340.26	6.92924	0.0117927	DUF581 domain containing protein, expressed
LOC_Os04g49748.1	43.7625	47.0484	361.289	186.739	6.03483	0.0243123	purine permease, putative, expressed
LOC_Os04g49757.1	2.36554	2.35242	55.9137	44.8892	21.3658	0.001532	purine permease, putative, expressed
LOC_Os04g49990.1	99.3526	92.9205	735.48	1029.76	9.1809	0.00193891	AT hook motif domain containing protein, expressed
LOC_Os04g50030.1	0	0	29.2472	17.9557	6599	0.00513793	DNA binding protein, putative, expressed
LOC_Os04g50200.1	0	0	39.5697	43.0937	6599	9.72e-05	OsFBX151 - F-box domain containing protein, expressed
LOC_Os04g50770.1	4.73108	9.40967	103.225	182.25	20.1882	0.000329551	MYB family transcription factor, putative, expressed
LOC_Os04g50880.1	4993.65	6218.62	929.888	708.352	0.146111	0.00789311	phosphoribulokinase/Uridine kinase family protein, expressed
LOC_Os04g50930.1	0	0	336.343	237.913	6599	2.03e-10	peptide transporter PTR2, putative, expressed
LOC_Os04g50960.1	85.1594	102.33	450.751	646.405	5.85182	0.0203722	expressed protein
LOC_Os04g51000.1	0	2.35242	98.9243	134.668	99.2987	2e-05	transcription factor FL, putative, expressed
LOC_Os04g51030.1	0	0	185.806	207.388	6599	6.47e-09	wall-associated kinase 1, putative, expressed
LOC_Os04g51110.1	130.105	102.33	509.245	737.979	5.36591	0.0289061	WD repeat-containing protein, putative, expressed
LOC_Os04g51110.2	15.376	17.6431	79.9996	107.734	5.68561	0.0491287	WD repeat-containing protein, putative, expressed
LOC_Os04g51400.1	254.295	188.193	1614.62	1270.37	6.5199	0.0103448	zinc finger, C3HC4 type domain containing protein, expressed
LOC_Os04g51410.1	105.266	90.5681	455.912	866.362	6.752	0.0116066	expressed protein
LOC_Os04g51520.1	0	0	20.6451	26.0358	6599	0.000572161	glycosyl hydrolases family 16, putative, expressed
LOC_Os04g51580.1	138.384	74.1012	1485.58	1251.51	12.8814	0.000277762	leucine rich repeat containing protein, expressed
LOC_Os04g51980.1	0	0	31.8278	52.9693	6599	4.21e-05	transferase family domain containing protein, expressed
LOC_Os04g51990.1	1.18277	1.17621	54.1933	49.3781	43.9052	0.000310349	transferase family domain containing protein, expressed
LOC_Os04g52614.1	2760.58	2784.09	407.74	721.819	0.20372	0.0382907	SHR5-receptor-like kinase, putative, expressed
LOC_Os04g53210.1	2777.14	4004.99	373.332	748.752	0.165447	0.0138243	hydroxyacid oxidase 1, putative, expressed
LOC_Os04g53370.1	15.376	30.5814	138.494	254.971	8.56151	0.00797832	acyltransferase, putative, expressed
LOC_Os04g53560.1	558.267	481.069	98.9243	90.6762	0.182425	0.0335177	expressed protein
LOC_Os04g53680.1	16.5588	16.4669	166.021	106.836	8.26196	0.0125489	cyclin, putative, expressed
LOC_Os04g53710.1	180.964	143.497	7.7419	16.1601	0.0736668	0.00249328	plastocyanin-like domain containing protein, putative, expressed
LOC_Os04g53760.1	225.909	295.228	1039.13	1483.14	4.83994	0.0425419	kinesin motor domain containing protein, putative, expressed
LOC_Os04g53780.1	0	0	33.5482	45.787	6599	0.000687393	leucoanthocyanidin reductase, putative, expressed
LOC_Os04g53930.1	597.298	618.686	89.4619	136.463	0.185796	0.0312574	organic cation transporter protein, putative, expressed
LOC_Os04g53950.1	33.1175	22.348	1062.36	1179.69	40.4224	2.74e-07	glycosyl hydrolases family 16 protein, protein, expressed
LOC_Os04g53950.2	13.0105	7.05725	277.848	359.114	31.7406	5.19e-06	glycosyl hydrolases family 16 protein, protein, expressed
LOC_Os04g54560.1	16.5588	5.88104	190.967	164.295	15.8317	0.000839656	transferase family protein, putative, expressed
LOC_Os04g54930.1	13.0105	18.8193	307.956	456.075	24.0036	1.58e-05	ABC transporter, ATP-binding protein, putative, expressed
LOC_Os04g55120.1	5.91384	4.70484	156.558	165.192	30.3004	3.45e-05	jp18, putative, expressed
LOC_Os04g55170.1	1.18277	0	104.946	117.61	188.165	9.81e-07	LTPL126 - Protease inhibitor/seed storage/LTP family protein precursor, expressed
LOC_Os04g55570.1	171.501	143.497	927.307	1009.11	6.14738	0.0142948	plant protein of unknown function DUF869 domain containing protein, expressed
LOC_Os04g55600.1	29.5692	23.5242	294.192	263.051	10.4955	0.0016862	expressed protein
LOC_Os04g55620.1	140.75	147.026	1171.61	1213.8	8.28914	0.00322369	receptor kinase, putative, expressed
LOC_Os04g55710.1	154.943	232.889	2254.61	3298.46	14.3182	0.000127276	transposon protein, putative, unclassified, expressed
LOC_Os04g55800.1	63.8695	82.3346	351.826	465.052	5.58725	0.0282036	sulfate transporter, putative, expressed
LOC_Os04g56170.1	2.36554	2.35242	216.773	240.606	96.9444	1.48e-07	OsSPL8 - SBP-box gene family member, expressed
LOC_Os04g56240.1	1.18277	0	218.494	356.42	486.075	4.27e-09	lipase, putative, expressed
LOC_Os04g56420.1	24.8381	12.9383	166.021	83.494	6.60503	0.0348273	retrotransposon protein, putative, unclassified, expressed
LOC_Os04g56850.1	21.2898	19.9956	218.494	245.993	11.2506	0.00135331	auxin response factor, putative, expressed
LOC_Os04g56920.1	15.376	14.1145	186.666	83.494	9.16091	0.0146072	glycosyl hydrolases, putative, expressed
LOC_Os04g56995.1	0	1.17621	27.5268	33.218	51.6445	0.00213342	expressed protein
LOC_Os04g57200.2	534.612	616.334	50.7525	99.6541	0.130681	0.00648857	heavy metal transport/detoxification protein, putative, expressed
LOC_Os04g57400.1	141.932	215.246	1177.63	2241.77	9.57336	0.00140672	methylthioribose kinase, putative, expressed
LOC_Os04g57410.1	10.6449	10.5859	48.1718	177.761	10.6418	0.00569941	methylthioribose kinase, putative, expressed
LOC_Os04g58080.1	26.0209	16.4669	145.376	96.9607	5.70366	0.0429098	polygalacturonase inhibitor 3 precursor, putative, expressed
LOC_Os04g58390.1	2532.31	2751.15	405.159	517.124	0.17456	0.0190347	allantoinase, putative, expressed
LOC_Os04g58570.1	6496.95	6222.15	1164.73	1476.86	0.207686	0.0409535	C2 domain containing protein, putative, expressed
LOC_Os04g58710.1	360.745	456.369	1593.97	3037.21	5.66773	0.0206757	AMP-binding domain containing protein, expressed
LOC_Os04g58800.1	1361.37	1259.72	7160.4	5460.33	4.81507	0.0406784	ubiquitin-conjugating enzyme, putative, expressed
LOC_Os04g58820.1	2027.27	2160.7	265.805	266.642	0.127138	0.00411654	ATOFP18/OFP18, putative, expressed
LOC_Os04g59190.1	104960	111676	4597.83	4027.46	0.0398146	2.96e-06	peroxidase precursor, putative, expressed
LOC_Os04g59260.1	11.8277	47.0484	1062.36	1346.68	40.9171	2.57e-07	peroxidase precursor, putative, expressed
LOC_Os04g59420.1	3512.82	4167.31	644.298	1022.58	0.217037	0.0498222	expressed protein
LOC_Os04g59480.1	845.68	899.8	107.526	109.53	0.124353	0.00431463	POT family protein, expressed
LOC_Os05g01140.1	8.27938	5.88104	77.419	181.352	18.2743	0.00042456	methyltransferase, putative, expressed
LOC_Os05g01350.1	170.319	129.383	767.308	914.842	5.61275	0.0235108	retrotransposon protein, putative, unclassified, expressed
LOC_Os05g01570.1	11.8277	4.70484	210.752	209.184	25.4006	5.57e-05	auxin-induced protein 5NG4, putative, expressed
LOC_Os05g01970.1	3935.07	4081.45	778.491	818.779	0.199247	0.0342074	NAD dependent epimerase/dehydratase family protein, putative, expressed
LOC_Os05g01970.2	275.585	278.762	31.8278	40.4003	0.130294	0.00850854	NAD dependent epimerase/dehydratase family protein, putative, expressed
LOC_Os05g02070.2	39.0314	43.5197	4134.17	5164.95	112.647	1.74e-10	expressed protein
LOC_Os05g02070.3	3.54831	7.05725	486.019	606.005	102.967	4.33e-09	expressed protein
LOC_Os05g02240.1	35.4831	28.229	232.257	237.913	7.3796	0.0117053	ATCHX20, putative, expressed
LOC_Os05g02390.1	0	4.70484	101.505	63.7427	35.1229	0.000105618	ZOS5-02 - C2H2 zinc finger protein, expressed
LOC_Os05g02420.1	124.191	85.8633	1726.44	1714.77	16.3825	6.07e-05	expressed protein
LOC_Os05g02420.2	1.18277	0	112.688	85.2895	167.384	2.29e-05	expressed protein
LOC_Os05g02520.1	20961	17385.5	4391.38	2733.75	0.185809	0.0246797	cupin domain containing protein, expressed
LOC_Os05g02520.2	80.4283	67.0439	10.3225	3.59114	0.0943478	0.0235443	cupin domain containing protein, expressed
LOC_Os05g02780.4	52.0418	35.2863	3.44084	3.59114	0.0805237	0.0495325	glycine-rich protein A3, putative, expressed
LOC_Os05g02890.1	199.888	112.916	975.479	913.047	6.03741	0.0157176	white-brown complex homolog protein 16, putative, expressed
LOC_Os05g03120.1	15.376	24.7004	611.61	840.326	36.2292	8.51e-07	retrotransposon protein, putative, unclassified, expressed
LOC_Os05g03640.1	0	0	272.687	202.002	6599	4.35e-09	flavonol synthase/flavanone 3-hydroxylase, putative, expressed
LOC_Os05g03810.1	62.6868	42.3435	1262.79	811.597	19.7504	2.88e-05	trehalose phosphatase, putative, expressed
LOC_Os05g03884.1	7.09661	3.52863	199.569	324.1	49.2854	1.26e-06	homeobox protein knotted-1-like 6, putative, expressed
LOC_Os05g04170.1	1168.58	978.606	4573.74	5731.46	4.79941	0.0414271	AMP-binding enzyme, putative, expressed
LOC_Os05g04170.2	33.1175	34.1101	184.085	219.059	5.99671	0.0240594	AMP-binding enzyme, putative, expressed
LOC_Os05g04380.1	179755	183985	31033	42484.1	0.202114	0.0349107	peroxidase precursor, putative, expressed
LOC_Os05g04410.1	12952.5	13008.9	554.836	663.463	0.0469274	9.14e-06	peroxidase precursor, putative, expressed
LOC_Os05g04440.1	2065.11	2279.49	27.5268	27.8313	0.0127418	3.58e-09	peroxidase precursor, putative, expressed
LOC_Os05g04470.1	13015.2	16449.3	2066.23	1652.82	0.126221	0.00345795	peroxidase precursor, putative, expressed
LOC_Os05g04500.1	7.09661	3.52863	832.684	1569.33	226.067	1.65e-11	peroxidase precursor, putative, expressed
LOC_Os05g04640.1	3.54831	0	73.9781	86.1873	45.1386	0.00031558	WRKY5, expressed
LOC_Os05g05060.1	2780.69	2731.16	486.879	447.994	0.169612	0.0166925	expressed protein
LOC_Os05g05580.1	0	0	14.6236	35.9114	6599	0.00388483	expressed protein
LOC_Os05g05820.1	3.54831	10.5859	71.3975	62.8449	9.49771	0.0188053	pro-resilin precursor, putative, expressed
LOC_Os05g06710.1	6258.03	6432.69	1192.25	1508.28	0.212796	0.0454459	GDSL-like lipase/acylhydrolase, putative, expressed
LOC_Os05g06780.1	0	0	12.043	22.4446	6599	0.00299572	LTPL104 - Protease inhibitor/seed storage/LTP family protein precursor, expressed
LOC_Os05g06970.1	146.663	111.74	1277.41	1319.74	10.0508	0.00112141	peroxidase precursor, putative, expressed
LOC_Os05g07060.1	2.36554	0	829.243	1094.4	813.195	5.22e-13	fasciclin domain containing protein, expressed
LOC_Os05g07600.1	4.73108	0	49.8922	61.9471	23.6393	0.0015373	expressed protein
LOC_Os05g08530.1	4.73108	2.35242	170.322	125.69	41.7889	2.09e-05	phototropic-responsive NPH3 family protein, putative, expressed
LOC_Os05g08910.1	91.0732	78.806	855.05	632.04	8.75381	0.00307504	expressed protein
LOC_Os05g09480.1	9.46215	15.2907	109.247	56.5604	6.69851	0.0441871	OsIAA16 - Auxin-responsive Aux/IAA gene family member, expressed
LOC_Os05g09704.1	1.18277	2.35242	1126.02	2570.36	1045.59	1.96e-14	HAD superfamily phosphatase, putative, expressed
LOC_Os05g09724.1	0	0	7.7419	38.6047	6599	0.00369645	HAD superfamily phosphatase, putative, expressed
LOC_Os05g09740.1	0	4.70484	39.5697	39.5025	16.8066	0.00296517	HAD superfamily phosphatase, putative, expressed
LOC_Os05g10210.1	2.36554	2.35242	784.512	2002.06	590.631	1.95e-13	HAD superfamily phosphatase, putative, expressed
LOC_Os05g10370.1	1.18277	0	30.1074	11.6712	35.3227	0.00340602	acid phosphatase, putative, expressed
LOC_Os05g10670.1	42.5797	24.7004	430.966	219.059	9.66148	0.00250881	zinc finger CCCH type family protein, putative, expressed
LOC_Os05g10690.1	7.09661	0	49.8922	61.0493	15.633	0.0040008	Myb transcription factor, putative, expressed
LOC_Os05g10940.1	1914.9	2562.96	273.547	385.15	0.147101	0.00836863	metal cation transporter, putative, expressed
LOC_Os05g11414.1	1.18277	0	17.2042	24.2402	35.0402	0.01094	OsMADS58 - MADS-box family gene with MIKCc type-box, expressed
LOC_Os05g11570.1	7.09661	15.2907	174.623	216.366	17.4647	0.000220334	NLI interacting factor-like phosphatase, putative, expressed
LOC_Os05g11750.1	66.2351	90.5681	366.45	432.732	5.09672	0.043462	protein kinase, putative, expressed
LOC_Os05g11900.1	8539.59	9319.1	989.243	1136.6	0.119037	0.00254431	expressed protein
LOC_Os05g11910.1	97552.4	110606	5932.88	8434.69	0.0690222	9.72e-05	GDSL-like lipase/acylhydrolase, putative, expressed
LOC_Os05g12481.1	3674.86	3552.15	693.33	365.398	0.146496	0.00826907	expressed protein
LOC_Os05g12580.1	1116.53	1966.62	159.999	307.042	0.151482	0.01008	expressed protein
LOC_Os05g12808.1	0	0	8.60211	14.3646	6599	0.0372625	DUF623 domain containing protein, expressed
LOC_Os05g13630.1	0	0	18.9246	9.87563	6599	0.0477531	RNA recognition motif containing protein, putative, expressed
LOC_Os05g13900.1	2.36554	3.52863	52.4729	69.1294	20.631	0.000745027	retrotransposon protein, putative, unclassified, expressed
LOC_Os05g13940.1	281.499	241.123	5837.39	14494.7	38.9041	1.74e-07	retrotransposon protein, putative, unclassified, expressed
LOC_Os05g13970.1	9326.13	11379.8	2067.95	765.81	0.136857	0.00563721	phosphorylase domain containing protein, putative, expressed
LOC_Os05g13970.2	80.4283	87.0395	8.60211	7.18228	0.0942533	0.0247384	phosphorylase domain containing protein, putative, expressed
LOC_Os05g14220.1	3.54831	1.17621	113.548	79.9028	40.9461	9.63e-05	tyrosine protein kinase domain containing protein, putative, expressed
LOC_Os05g14240.1	149.029	157.612	1529.46	1216.5	8.95495	0.00200496	aquaporin protein, putative, expressed
LOC_Os05g14310.1	4.73108	12.9383	86.8813	90.6762	10.0489	0.00932297	expressed protein
LOC_Os05g15510.1	56.7729	92.9205	888.598	1007.31	12.6653	0.000316568	cellulase, putative, expressed
LOC_Os05g15630.1	0	0	48.1718	72.7205	6599	5.06e-06	membrane associated DUF588 domain containing protein, putative, expressed
LOC_Os05g15770.1	44.9452	58.8104	3310.95	3813.79	68.6684	4.69e-09	glycosyl hydrolase, putative, expressed
LOC_Os05g15850.1	0	0	98.0641	120.303	6599	1.19e-07	glycosyl hydrolase, putative, expressed
LOC_Os05g15920.1	521.601	537.528	9.46232	1.79557	0.0106294	2.12e-08	glycosyl hydrolase, putative, expressed
LOC_Os05g16240.1	0	2.35242	36.9891	35.0136	30.6079	0.004266	expressed protein
LOC_Os05g16640.1	69.7834	62.3391	753.545	791.846	11.6967	0.000548186	DUF630/DUF632 domains containing protein, putative, expressed
LOC_Os05g17604.1	42.5797	16.4669	827.523	320.509	19.4428	5.07e-05	SHR5-receptor-like kinase, putative, expressed
LOC_Os05g18294.1	0	0	3.44084	18.8535	6599	0.0298866	SEC14 cytosolic factor family protein, putative, expressed
LOC_Os05g18604.1	0	0	18.0644	8.08006	6599	0.0135125	OsSCP28 - Putative Serine Carboxypeptidase homologue, expressed
LOC_Os05g19150.1	2518.12	2966.4	411.181	505.453	0.167131	0.0154791	hydrolase, alpha/beta fold family domain containing protein, expressed
LOC_Os05g19570.1	1867.59	2107.77	3.44084	5.38671	0.00222057	1.95e-13	expansin precursor, putative, expressed
LOC_Os05g19600.1	70.9661	104.683	0	0	0	2.95e-06	expansin precursor, putative, expressed
LOC_Os05g20020.1	5.91384	0	74.8384	155.317	38.918	5.99e-05	polygalacturonase, putative, expressed
LOC_Os05g24140.1	1.18277	8.23346	33.5482	55.6626	9.47416	0.0209976	tetracycline transporter-like protein 1, putative, expressed
LOC_Os05g25430.1	7.09661	7.05725	144.515	78.1073	15.7288	0.0031713	receptor-like protein kinase At3g46290 precursor, putative, expressed
LOC_Os05g25480.1	0	0	69.6771	88.8807	6599	1.06e-06	OsMan06 - Endo-Beta-Mannanase, expressed
LOC_Os05g25914.1	56.7729	58.8104	3.44084	0	0.0297694	0.0028558	expressed protein
LOC_Os05g25920.1	1804.91	2186.57	455.052	353.727	0.202626	0.0400554	expressed protein
LOC_Os05g27790.1	3470.24	3865.02	763.007	723.614	0.202668	0.0379553	membrane associated DUF588 domain containing protein, putative, expressed
LOC_Os05g28040.1	2.36554	0	61.9352	49.3781	47.0563	0.000891538	DUF640 domain containing protein, putative, expressed
LOC_Os05g28740.1	2676.61	2888.77	430.106	155.317	0.10519	0.00143674	universal stress protein domain containing protein, putative, expressed
LOC_Os05g28780.1	0	0	9.46232	10.7734	6599	0.0364616	GCRP10 - Glycine and cysteine rich family protein precursor, expressed
LOC_Os05g28830.1	7.09661	4.70484	86.0211	128.383	18.1676	0.000796072	PMR5, putative, expressed
LOC_Os05g29710.1	145.481	41.1673	2072.25	1282.04	17.9712	3.66e-05	RING-H2 finger protein, putative, expressed
LOC_Os05g29790.1	21.2898	4.70484	70.5373	158.01	8.79208	0.0186907	pectinesterase, putative, expressed
LOC_Os05g30250.1	35.4831	2.35242	134.193	184.944	8.43485	0.00798081	Os5bglu19 - beta-glucosidase homologue, similar to G. max isohydroxyurate hydrolase, expressed
LOC_Os05g30790.1	30.752	54.1056	275.268	210.082	5.71957	0.0326643	CW-type Zinc Finger, putative, expressed
LOC_Os05g31140.1	159.674	130.559	3194.82	1809.93	17.2439	3.84e-05	glycosyl hydrolases family 17, putative, expressed
LOC_Os05g31280.1	42.5797	49.4008	391.396	755.037	12.4639	0.000534397	GASR5 - Gibberellin-regulated GASA/GAST/Snakin family protein precursor, expressed
LOC_Os05g31470.1	57.9557	77.6298	3.44084	5.38671	0.0651069	0.00640959	expressed protein
LOC_Os05g31910.1	0	0	44.731	43.9914	6599	5.9e-05	white-brown complex homolog protein 16, putative, expressed
LOC_Os05g32070.1	14.1932	25.8766	120.43	245.993	9.1446	0.00700003	LRP1, putative, expressed
LOC_Os05g32720.1	29.5692	94.0967	4.30106	4.48892	0.0710784	0.0216139	early-responsive to dehydration protein-related, putative, expressed
LOC_Os05g33090.1	5.91384	1.17621	54.1933	66.4361	17.0139	0.00221578	expressed protein
LOC_Os05g33630.1	9.46215	17.6431	2350.1	1379.89	137.611	1.25e-10	inosine-uridine preferring nucleoside hydrolase family protein, putative, expressed
LOC_Os05g33820.1	4041.52	4733.06	758.706	902.273	0.189294	0.026919	lipase, putative, expressed
LOC_Os05g34150.1	37.8486	56.458	978.92	1532.52	26.6306	3.71e-06	glutathione S-transferase, putative, expressed
LOC_Os05g34700.1	535.794	441.078	7157.82	7795.46	15.3073	7.24e-05	GDSL-like lipase/acylhydrolase, putative, expressed
LOC_Os05g35070.1	16.5588	11.7621	170.322	200.206	13.0832	0.000967473	DUF630/DUF632 domains containing protein, putative, expressed
LOC_Os05g35140.1	0	0	216.773	182.25	6599	7.9e-09	nodulin MtN3 family protein, putative, expressed
LOC_Os05g35200.2	57.9557	49.4008	316.558	412.083	6.78712	0.0103282	glycosyl transferase, putative, expressed
LOC_Os05g35230.1	18.9243	22.348	195.268	159.806	8.6032	0.00789311	expressed protein
LOC_Os05g35240.1	0	1.17621	21.5053	35.9114	48.815	0.00711679	expressed protein
LOC_Os05g35266.1	315.799	379.916	2252.03	1097.99	4.81522	0.0435419	galactosyltransferase, putative, expressed
LOC_Os05g35266.2	40.2141	47.0484	311.396	175.966	5.58501	0.0421579	galactosyltransferase, putative, expressed
LOC_Os05g35480.1	489.666	523.413	2649.45	2736.45	5.31636	0.0265904	anthranilate phosphoribosyltransferase, putative, expressed
LOC_Os05g36260.1	1069.22	1325.59	55.0535	108.632	0.0683501	0.00014579	soluble inorganic pyrophosphatase, putative, expressed
LOC_Os05g36900.1	0	1.17621	36.1289	32.3202	58.1947	0.00292899	dof zinc finger domain containing protein, putative, expressed
LOC_Os05g36990.1	227.092	164.669	1097.63	1168.92	5.78553	0.0197487	ATOFP18/OFP18, putative, expressed
LOC_Os05g37130.1	1.18277	3.52863	369.031	348.34	152.263	5.31e-09	glycosyl hydrolases family 17, putative, expressed
LOC_Os05g37130.2	0	0	24.0859	26.0358	6599	0.00476076	glycosyl hydrolases family 17, putative, expressed
LOC_Os05g37470.1	20.1071	11.7621	93.763	106.836	6.29447	0.0371725	transmembrane amino acid transporter protein, putative, expressed
LOC_Os05g37600.1	113.546	103.506	559.997	713.739	5.86834	0.0201907	glycerol-3-phosphate acyltransferase, putative, expressed
LOC_Os05g38000.1	136.018	176.431	3145.79	3757.23	22.0932	8.21e-06	ATROPGEF7/ROPGEF7, putative, expressed
LOC_Os05g38040.1	1557.71	1404.39	339.783	234.322	0.193817	0.0331816	expressed protein
LOC_Os05g38410.1	102.901	127.031	420.643	1546.88	8.55701	0.00286544	laccase precursor protein, putative, expressed
LOC_Os05g38420.1	18.9243	25.8766	68.8169	293.576	8.08895	0.00789311	laccase precursor protein, putative, expressed
LOC_Os05g38480.1	75.6972	88.2157	568.599	729.899	7.92188	0.0046156	kinesin motor domain containing protein, putative, expressed
LOC_Os05g38890.1	0	0	20.6451	15.2623	6599	0.020978	transposon protein, putative, CACTA, En/Spm sub-class, expressed
LOC_Os05g39120.1	8.27938	8.23346	146.236	152.623	18.0986	0.000383522	expressed protein
LOC_Os05g39320.1	1633.4	1761.96	21586.1	6679.52	8.32478	0.00250881	thiamine pyrophosphate enzyme, C-terminal TPP binding domain containing protein, expressed
LOC_Os05g39400.1	4.73108	5.88104	35.2687	74.5161	10.3452	0.0176555	expressed protein
LOC_Os05g39500.1	2.36554	2.35242	144.515	96.9607	51.1824	3.46e-05	DUF640 domain containing protein, putative, expressed
LOC_Os05g39800.1	0	0	18.0644	39.5025	6599	0.000359203	NFD4, putative, expressed
LOC_Os05g39830.1	0	0	16.344	10.7734	6599	0.0373896	expressed protein
LOC_Os05g39840.1	44.9452	59.9867	411.181	390.536	7.64036	0.00664342	expressed protein
LOC_Os05g39880.1	3.54831	3.52863	77.419	89.7785	23.6257	0.000709985	expressed protein
LOC_Os05g40384.1	8.27938	7.05725	80.8598	105.939	12.1799	0.00558961	cytochrome P450, putative, expressed
LOC_Os05g41390.1	67.4178	51.7532	735.48	990.256	14.4812	0.00014708	cyclin, putative, expressed
LOC_Os05g41610.1	0	7.05725	419.783	562.013	139.119	2.38e-09	glycosyl hydrolases family 17, putative, expressed
LOC_Os05g41990.1	36613.8	39558.3	3275.68	6158.8	0.123858	0.00297547	peroxidase precursor, putative, expressed
LOC_Os05g42190.1	921.377	953.905	112.688	195.717	0.164458	0.0159071	NADPH-dependent FMN reductase domain containing protein, expressed
LOC_Os05g42360.1	195.157	478.717	58.4944	34.1158	0.13743	0.0130795	expressed protein
LOC_Os05g43120.1	1613.3	1206.79	220.214	70.0272	0.102919	0.0015858	GDSL-like lipase/acylhydrolase, putative, expressed
LOC_Os05g43140.1	87.5249	54.1056	320.859	521.613	5.94838	0.0203722	expressed protein
LOC_Os05g43310.1	16.5588	16.4669	365.59	633.836	30.2621	3.43e-06	photosystem II reaction center W protein, chloroplast precursor, putative, expressed
LOC_Os05g43760.1	4.73108	11.7621	271.827	343.851	37.3293	2.12e-06	TCP family transcription factor, putative, expressed
LOC_Os05g43860.1	31.9348	21.1718	377.633	738.877	21.024	2.65e-05	expressed protein
LOC_Os05g43910.1	1.18277	4.70484	153.978	169.681	54.973	6.96e-06	cytochrome P450, putative, expressed
LOC_Os05g44190.1	42.5797	45.8722	466.234	394.127	9.7269	0.00196029	expressed protein
LOC_Os05g44930.1	463.645	454.017	23.2257	17.9557	0.0448764	3.49e-05	receptor-like protein kinase, putative, expressed
LOC_Os05g44990.1	26.0209	18.8193	0	0	0	0.00950506	light repressible receptor protein kinase, putative, expressed
LOC_Os05g45020.1	3117.78	4321.39	692.47	569.195	0.169598	0.0162083	zinc finger/CCCH transcription factor, putative, expressed
LOC_Os05g45120.1	0	3.52863	10.3225	56.5604	18.9544	0.0140376	anthocyanidin 5,3-O-glucosyltransferase, putative, expressed
LOC_Os05g45140.1	3.54831	1.17621	35.2687	107.734	30.2682	0.00036033	glucosyl transferase, putative, expressed
LOC_Os05g45150.1	22.4726	21.1718	131.612	224.446	8.15817	0.00897907	anthocyanidin 5,3-O-glucosyltransferase, putative, expressed
LOC_Os05g45180.1	0	2.35242	12.043	68.2316	34.1243	0.00153962	anthocyanidin 5,3-O-glucosyltransferase, putative, expressed
LOC_Os05g45430.1	7.09661	11.7621	356.988	367.194	38.4004	2.23e-06	TOO MANY MOUTHS precursor, putative, expressed
LOC_Os05g45460.1	0	0	69.6771	66.4361	6599	4.81e-06	POEI52 - Pollen Ole e I allergen and extensin family protein precursor, expressed
LOC_Os05g46360.1	166.77	170.55	1003.87	1180.59	6.47589	0.0111141	possible lysine decarboxylase domain containing protein, expressed
LOC_Os05g46480.1	5618.15	7426.58	286.45	270.233	0.0426749	5.21e-06	late embryogenesis abundant protein, group 3, putative, expressed
LOC_Os05g46750.1	296.875	689.258	36.9891	35.9114	0.0739255	0.000443515	STE_MEKK_ste11_MAP3K.18 - STE kinases include homologs to sterile 7, sterile 11 and sterile 20 from yeast, expressed
LOC_Os05g46760.1	630.416	1397.34	210.752	198.41	0.201781	0.0419867	STE_MEKK_ste11_MAP3K.19 - STE kinases include homologs to sterile 7, sterile 11 and sterile 20 from yeast, expressed
LOC_Os05g47540.1	2.36554	1.17621	78.2792	193.024	76.6014	1.09e-06	CPuORF26 - conserved peptide uORF-containing transcript, expressed
LOC_Os05g48040.3	2027.27	2279.49	371.611	241.504	0.142361	0.00741525	MATE efflux family protein, putative, expressed
LOC_Os05g48640.1	0	0	58.4944	75.4139	6599	3.9e-06	ATROPGEF7/ROPGEF7, putative, expressed
LOC_Os05g48660.1	22.4726	7.05725	455.052	379.763	28.2702	8.77e-06	MRH1, putative, expressed
LOC_Os05g48700.1	94.6215	128.207	1117.41	431.834	6.95266	0.00923258	gibberellin 2-beta-dioxygenase, putative, expressed
LOC_Os05g48850.1	30.752	48.2246	145.376	272.926	5.29654	0.0402146	no apical meristem protein, putative, expressed
LOC_Os05g48890.1	13160.7	17754.9	3434.82	2924.08	0.205686	0.0390743	fasciclin domain containing protein, expressed
LOC_Os05g49010.1	120.642	134.088	14.6236	10.7734	0.0997016	0.0126464	AP2 domain containing protein, expressed
LOC_Os05g49260.1	2315.86	2740.57	46.4514	139.157	0.0367073	2.23e-06	transporter family protein, putative, expressed
LOC_Os05g49270.1	2570.16	2902.88	382.794	601.516	0.179847	0.0212553	transporter family protein, putative, expressed
LOC_Os05g49280.1	0	2.35242	29.2472	26.9335	23.8821	0.048436	GATA zinc finger domain containing protein, expressed
LOC_Os05g49370.1	0	0	481.718	556.626	6599	2.7e-12	DUF1645 domain containing protein, putative, expressed
LOC_Os05g49820.1	13.0105	11.7621	103.225	161.601	10.6903	0.00311907	chloroplast unusual positioning protein, putative, expressed
LOC_Os05g49840.1	2.36554	0	33.5482	38.6047	30.5017	0.00165626	phospholipase, putative, expressed
LOC_Os05g49900.1	7.09661	2.35242	68.8169	47.5826	12.3187	0.0153325	3-ketoacyl-CoA synthase, putative, expressed
LOC_Os05g50160.1	7.09661	21.1718	126.451	96.0629	7.87148	0.0200309	DUF617 domain containing protein, expressed
LOC_Os05g50500.1	946.215	1286.77	79.9996	58.356	0.0619599	9.21e-05	secretory protein, putative, expressed
LOC_Os05g51020.2	22.4726	7.05725	111.827	122.996	7.95208	0.0183684	leaf senescence related protein, putative, expressed
LOC_Os05g51070.1	86.3421	85.8633	1035.69	869.953	11.0661	0.000780225	inactive receptor kinase At2g26730 precursor, putative, expressed
LOC_Os05g51240.1	0	0	30.9676	37.707	6599	0.000627128	hydrolase, alpha/beta fold family domain containing protein, expressed
LOC_Os05g51620.1	42.5797	18.8193	2979.77	3594.73	107.078	2.98e-10	expressed protein
LOC_Os05g51740.1	16.5588	15.2907	192.687	240.606	13.6044	0.00087128	receptor protein kinase CLAVATA1 precursor, putative, expressed
LOC_Os05g51820.1	1.18277	2.35242	32.688	30.5247	17.881	0.0111141	helix-loop-helix DNA-binding protein, putative, expressed
LOC_Os06g01630.1	1418.14	1598.47	264.085	348.34	0.203018	0.0382553	2-oxo acid dehydrogenases acyltransferase domain containing protein, expressed
LOC_Os06g01934.1	1.18277	2.35242	263.225	335.771	169.438	9.28e-09	homeobox domain containing protein, expressed
LOC_Os06g01972.1	1.18277	4.70484	39.5697	68.2316	18.3099	0.00351416	auxin-induced protein 5NG4, putative, expressed
LOC_Os06g02780.1	18.9243	16.4669	96.3436	149.93	6.95861	0.0190169	aspartic protease, putative, expressed
LOC_Os06g02930.1	4.73108	2.35242	49.8922	46.6848	13.6341	0.0109076	expressed protein
LOC_Os06g03059.1	3.54831	1.17621	38.7095	52.0715	19.2149	0.00338572	expressed protein
LOC_Os06g03080.1	9.46215	7.05725	98.9243	136.463	14.2492	0.00123903	aspartic protease, putative, expressed
LOC_Os06g03120.1	1.18277	2.35242	23.2257	28.7291	14.6965	0.0478187	aspartic proteinase nepenthesin-2 precursor, putative, expressed
LOC_Os06g03150.1	14.1932	5.88104	172.902	199.308	18.5417	0.000215081	expressed protein
LOC_Os06g03610.1	0	2.35242	28.387	41.2981	29.6227	0.0214637	TKL_IRAK_CrRLK1L-1.13 - The CrRLK1L-1 subfamily has homology to the CrRLK1L homolog, expressed
LOC_Os06g03710.1	47.3108	52.9294	504.084	597.027	10.9847	0.00083553	DELLA protein SLR1, putative, expressed
LOC_Os06g03830.1	17.7415	7.05725	1014.19	469.541	59.8308	8.34e-08	retinol dehydrogenase, putative, expressed
LOC_Os06g03980.1	9.46215	9.40967	72.2577	57.4582	6.87352	0.0332403	expressed protein
LOC_Os06g04090.1	167.953	112.916	511.826	895.989	5.01235	0.0414753	no apical meristem protein, putative, expressed
LOC_Os06g04370.1	1.18277	12.9383	343.224	477.621	58.1291	1.73e-07	expressed protein
LOC_Os06g05480.1	710.844	1009.19	169.462	141.85	0.180992	0.027372	expressed protein
LOC_Os06g05630.1	61.504	54.1056	493.761	916.638	12.1997	0.000456118	GDSL-like lipase/acylhydrolase, putative, expressed
LOC_Os06g05690.1	1240.72	1178.56	121.29	149.032	0.111736	0.00226617	cysteine synthase, chloroplast/chromoplast precursor, putative, expressed
LOC_Os06g06430.1	234.188	397.559	67.0965	35.0136	0.161631	0.0270532	expressed protein
LOC_Os06g07030.1	33.1175	32.9339	190.107	185.841	5.69175	0.0414369	AP2 domain containing protein, expressed
LOC_Os06g08340.1	3.54831	0	107.526	83.494	53.8342	8.22e-05	AP2 domain containing protein, expressed
LOC_Os06g08990.1	56.7729	2.35242	0	0	0	0.00198544	expressed protein
LOC_Os06g09020.1	83.9766	16.4669	1.72042	5.38671	0.0707575	0.0186747	expressed protein
LOC_Os06g09220.1	0	0	28.387	33.218	6599	0.000627128	cytochrome P450 72A1, putative, expressed
LOC_Os06g09340.1	3120.14	3646.25	423.224	597.924	0.150915	0.00906647	pectinesterase, putative, expressed
LOC_Os06g09410.1	0	4.70484	45.5912	37.707	17.7048	0.00929163	transposon protein, putative, CACTA, En/Spm sub-class, expressed
LOC_Os06g09870.1	1452.44	2265.38	100.645	17.0579	0.031659	1.34e-06	retrotransposon protein, putative, unclassified, expressed
LOC_Os06g10310.1	5.91384	0	274.407	188.535	78.2811	8.35e-07	growth regulating factor protein, putative, expressed
LOC_Os06g10650.1	2065.11	2307.72	410.321	472.235	0.201827	0.0379165	tyrosine phosphatase family protein, putative, expressed
LOC_Os06g10750.1	0	2.35242	1017.63	1346.68	1005.05	8.98e-14	integral membrane protein DUF6 containing protein, expressed
LOC_Os06g10870.1	1143.74	1162.09	36.9891	9.87563	0.0203244	1.39e-07	retrotransposon protein, putative, unclassified, expressed
LOC_Os06g10910.1	0	0	17.2042	27.8313	6599	0.012361	xyloglucan fucosyltransferase, putative, expressed
LOC_Os06g10920.1	0	0	24.0859	24.2402	6599	0.00736309	xyloglucan fucosyltransferase, putative, expressed
LOC_Os06g10930.1	0	0	19.7849	23.3424	6599	0.0112948	xyloglucan fucosyltransferase, putative, expressed
LOC_Os06g10980.1	0	4.70484	12.043	53.8671	14.009	0.0228008	xyloglucan fucosyltransferase, putative, expressed
LOC_Os06g10990.1	0	0	22.3655	40.4003	6599	0.000553692	DnaK family protein, putative, expressed
LOC_Os06g11330.1	2.36554	0	34.4084	31.4225	27.8291	0.0112697	OsMADS55 - MADS-box family gene with MIKCc type-box, expressed
LOC_Os06g11490.1	81.6111	118.797	416.342	959.732	6.86636	0.00906647	plastocyanin-like domain containing protein, putative, expressed
LOC_Os06g12120.1	23.6554	16.4669	198.709	153.521	8.77891	0.00798081	BRASSINOSTEROID INSENSITIVE 1-associated receptor kinase 1 precursor, putative, expressed
LOC_Os06g12410.1	4.73108	7.05725	91.1824	172.375	22.3575	0.000227108	GDSL-like lipase/acylhydrolase, putative, expressed
LOC_Os06g12820.1	1.18277	0	49.032	78.1073	107.493	3.55e-05	proteins of unknown function domain containing protein, expressed
LOC_Os06g12980.1	1.18277	0	26.6665	23.3424	42.2812	0.0125228	cyclin, putative, expressed
LOC_Os06g13180.1	2534.67	2927.58	638.277	447.994	0.198869	0.0361397	metalloendoproteinase 1 precursor, putative, expressed
LOC_Os06g13210.1	7.09661	1.17621	51.6127	53.8671	12.7502	0.00969389	peptide transporter PTR2, putative, expressed
LOC_Os06g13560.1	5.91384	4.70484	67.9567	62.8449	12.3181	0.00953536	SAM dependent carboxyl methyltransferase, putative, expressed
LOC_Os06g14324.1	15.376	15.2907	338.063	548.546	28.9111	5.63e-06	caleosin related protein, putative, expressed
LOC_Os06g14370.3	115.911	244.651	27.5268	26.0358	0.148552	0.0268855	caleosin related protein, putative, expressed
LOC_Os06g14540.1	31.9348	34.1101	670.965	965.118	24.7723	7.45e-06	endoglucanase, putative, expressed
LOC_Os06g14630.1	0	0	12.9032	12.569	6599	0.0182284	GDSL-like lipase/acylhydrolase, putative, expressed
LOC_Os06g15170.1	0	0	14.6236	44.8892	6599	0.00083553	3-ketoacyl-CoA synthase, putative, expressed
LOC_Os06g15330.1	31.9348	35.2863	346.665	304.349	9.68468	0.00242708	CCT/B-box zinc finger protein, putative, expressed
LOC_Os06g15480.1	21.2898	30.5814	402.579	427.345	15.9997	0.000191684	transcription factor, putative, expressed
LOC_Os06g16000.1	1.18277	0	85.1609	135.565	186.618	3.38e-06	UDP-glucoronosyl and UDP-glucosyl transferase, putative, expressed
LOC_Os06g16030.1	59.1384	45.8722	1.72042	7.18228	0.084779	0.0308226	amidase family protein, putative, expressed
LOC_Os06g16150.1	23.6554	23.5242	239.139	146.339	8.17044	0.0142492	expressed protein
LOC_Os06g16200.1	1.18277	1.17621	29.2472	49.3781	33.3303	0.00616272	proteins of unknown function domain containing protein, expressed
LOC_Os06g16350.1	3.54831	0	164.3	328.589	138.908	1.99e-08	peroxidase precursor, putative, expressed
LOC_Os06g16640.1	0	0	18.9246	37.707	6599	0.000903959	carboxyl-terminal peptidase, putative, expressed
LOC_Os06g17260.1	30.752	59.9867	1.72042	1.79557	0.0387485	0.0126938	UDP-glucoronosyl and UDP-glucosyl transferase domain containing protein, expressed
LOC_Os06g17490.1	108.815	99.9778	621.933	834.94	6.97761	0.00838363	expressed protein
LOC_Os06g17560.1	0	0	24.0859	32.3202	6599	0.00730773	cadmium tolerance factor, putative, expressed
LOC_Os06g18140.1	4.73108	0	26.6665	43.0937	14.7451	0.0138351	UDP-glucoronosyl and UDP-glucosyl transferase domain containing protein, expressed
LOC_Os06g18670.1	2.36554	2.35242	27.5268	96.0629	26.1956	0.000204402	anthocyanidin 3-O-glucosyltransferase, putative, expressed
LOC_Os06g18780.1	75.6972	64.6915	252.902	429.141	4.85825	0.0486574	transposon protein, putative, CACTA, En/Spm sub-class, expressed
LOC_Os06g18820.1	8.27938	7.05725	110.107	124.792	15.3162	0.00163792	serine threonine kinase, putative, expressed
LOC_Os06g18960.1	0	4.70484	49.032	83.494	28.168	0.000743041	embryogenesis transmembrane protein, putative, expressed
LOC_Os06g19095.1	72.1489	102.33	790.534	533.284	7.58726	0.00634096	expressed protein
LOC_Os06g19550.1	0	4.70484	138.494	85.2895	47.5646	1.58e-05	oxidoreductase, short chain dehydrogenase/reductase family, putative, expressed
LOC_Os06g19590.1	10.6449	19.9956	540.213	374.376	29.849	5.75e-06	estradiol 17-beta-dehydrogenase 12, putative, expressed
LOC_Os06g19740.1	0	0	5.16127	26.9335	6599	0.00325036	expressed protein
LOC_Os06g20040.1	197.522	152.907	759.566	1256	5.7517	0.0195823	aspartic proteinase nepenthesin-2 precursor, putative, expressed
LOC_Os06g20200.1	10.6449	29.4052	395.697	295.371	17.2551	0.000134966	gibberellin receptor GID1L2, putative, expressed
LOC_Os06g20570.1	0	0	23.2257	43.9914	6599	0.00158585	glycosyltransferase, putative, expressed
LOC_Os06g20900.1	0	0	437.847	447.994	6599	1.98e-11	expressed protein
LOC_Os06g20920.1	0	0	134.193	130.179	6599	6.83e-08	SAM dependent carboxyl methyltransferase, putative, expressed
LOC_Os06g21110.1	0	0	117.849	244.197	6599	3.58e-09	expressed protein
LOC_Os06g21140.1	43.7625	28.229	368.17	491.088	11.9356	0.000619074	glycine-rich cell wall structural protein precursor, putative, expressed
LOC_Os06g21210.1	1.18277	1.17621	948.813	1439.15	1012.29	8.98e-14	glycine rich protein family protein, putative, expressed
LOC_Os06g21230.1	0	0	5.16127	18.8535	6599	0.0116066	glycine rich protein family protein, putative, expressed
LOC_Os06g21240.1	0	4.70484	260.644	429.141	146.612	3.56e-09	glycine rich protein family protein, putative, expressed
LOC_Os06g21250.1	0	2.35242	218.494	491.088	301.639	5.76e-10	glycine rich protein family protein, putative, expressed
LOC_Os06g21270.1	2.36554	0	394.837	846.611	524.806	9.35e-12	glycine rich protein family protein, putative, expressed
LOC_Os06g21270.2	0	0	61.075	94.2674	6599	1.07e-06	glycine rich protein family protein, putative, expressed
LOC_Os06g21390.4	105.266	116.445	17.2042	10.7734	0.12619	0.0345736	Zinc finger C-x8-C-x5-C-x3-H type domain containing protein, expressed
LOC_Os06g21410.1	1342.44	2512.38	147.096	120.303	0.0693674	0.00014708	arabinogalactan peptide 23 precursor, putative, expressed
LOC_Os06g22060.1	21.2898	23.5242	159.999	474.03	14.148	0.000274592	pyrophosphate--fructose 6-phosphate 1-phosphotransferase subunit alpha, putative, expressed
LOC_Os06g22340.1	10.6449	4.70484	72.2577	99.6541	11.1996	0.00707981	cytochrome P450, putative, expressed
LOC_Os06g22440.1	0	0	126.451	120.303	6599	1.62e-07	SAM dependent carboxyl methyltransferase, putative, expressed
LOC_Os06g22960.1	191741	192472	38460.9	28975.1	0.175517	0.0184005	aquaporin protein, putative, expressed
LOC_Os06g23910.1	0	0	24.9461	22.4446	6599	0.00211127	expressed protein
LOC_Os06g24190.1	264.94	311.695	27.5268	28.7291	0.0975588	0.00289747	expressed protein
LOC_Os06g24490.1	2.36554	0	44.731	52.0715	40.922	0.000721005	expressed protein
LOC_Os06g24990.1	3.54831	11.7621	73.9781	52.9693	8.29158	0.0116066	xylanase inhibitor protein 1 precursor, putative, expressed
LOC_Os06g25010.1	10.6449	3.52863	103.225	68.2316	12.097	0.00179365	glycosyl hydrolase, putative, expressed
LOC_Os06g28194.1	0	0	29.2472	57.4582	6599	0.000241419	expressed protein
LOC_Os06g29470.1	688.372	926.853	0	0	0	3.34e-14	peroxidase precursor, putative, expressed
LOC_Os06g29844.1	4.73108	2.35242	25.8063	73.6183	14.0361	0.0131112	MATE efflux family protein, putative, expressed
LOC_Os06g30130.1	177.415	204.66	1423.65	1299.09	7.12619	0.00684825	cysteine-rich receptor-like protein kinase 10 precursor, putative, expressed
LOC_Os06g30210.1	5.91384	16.4669	94.6232	61.0493	6.95564	0.0373896	expressed protein
LOC_Os06g30640.1	15.376	1.17621	92.9028	45.787	8.37893	0.0156451	cytochrome P450, putative, expressed
LOC_Os06g32860.1	173.867	244.651	30.1074	26.9335	0.136292	0.012704	zinc finger C-x8-C-x5-C-x3-H type family protein, expressed
LOC_Os06g33450.1	2.36554	0	94.6232	59.2538	65.0495	0.000102184	helix-loop-helix DNA-binding domain containing protein, expressed
LOC_Os06g33710.1	50.8591	32.9339	366.45	520.715	10.5876	0.00107814	spermidine synthase, putative, expressed
LOC_Os06g33720.1	5.91384	0	144.515	175.068	54.0399	2.79e-06	flavin-containing monooxygenase family protein, putative, expressed
LOC_Os06g33940.1	0	0	30.1074	53.8671	6599	0.000338772	NAC domain containing protein, putative, expressed
LOC_Os06g34730.1	3.54831	0	30.1074	35.0136	18.3527	0.00647084	expressed protein
LOC_Os06g34850.1	0	0	13.7634	24.2402	6599	0.0389256	expressed protein
LOC_Os06g35480.1	6331.36	7655.94	780.211	905.865	0.120543	0.00276553	peroxidase precursor, putative, expressed
LOC_Os06g35560.1	165.588	72.925	892.899	272.029	4.88413	0.0479065	reticuline oxidase-like protein precursor, putative, expressed
LOC_Os06g35770.1	1435.88	1999.56	300.214	419.265	0.209429	0.045187	expressed protein
LOC_Os06g35940.1	14.1932	7.05725	147.956	134.668	13.2997	0.000999418	osFTL12 FT-Like12 homologous to Flowering Locus T gene; contains Pfam profile PF01161: Phosphatidylethanolamine-binding protein, expressed
LOC_Os06g36040.1	10.6449	17.6431	142.795	114.019	9.07852	0.0170977	expressed protein
LOC_Os06g36070.1	52.0418	79.9822	386.235	291.78	5.13554	0.0461517	expressed protein
LOC_Os06g36520.1	9.46215	7.05725	77.419	93.3696	10.3387	0.0112948	GDSL-like lipase/acylhydrolase, putative, expressed
LOC_Os06g36560.1	7760.15	7878.25	425.804	648.2	0.0686774	9.8e-05	inositol oxygenase, putative, expressed
LOC_Os06g36680.1	5.91384	0	123.01	175.966	50.5553	6.96e-06	homeobox domain containing protein, expressed
LOC_Os06g36850.1	13.0105	0	492.901	585.356	82.8761	1.89e-08	cysteine synthase, putative, expressed
LOC_Os06g36880.1	21.2898	15.2907	136.774	146.339	7.73942	0.0156451	cysteine synthase, putative, expressed
LOC_Os06g37010.1	1139.01	2053.66	41.2901	68.2316	0.0343042	2.01e-06	metal cation transporter, putative, expressed
LOC_Os06g37224.1	0	0	13.7634	14.3646	6599	0.0280212	cytochrome P450, putative, expressed
LOC_Os06g38764.1	73.3317	24.7004	401.719	377.967	7.95338	0.0066342	expressed protein
LOC_Os06g38990.1	2.36554	10.5859	162.58	194.819	27.5954	5.59e-05	receptor-like protein kinase 2 precursor, putative, expressed
LOC_Os06g39080.1	1.18277	3.52863	54.1933	70.925	26.5565	0.00128994	UDP-glucoronosyl and UDP-glucosyl transferase domain containing protein, expressed
LOC_Os06g39110.1	2.36554	0	1238.7	583.56	770.338	1.55e-12	expressed protein
LOC_Os06g39120.1	2.36554	0	748.384	685.01	605.948	9.18e-12	expressed protein
LOC_Os06g40180.1	2378.55	2399.47	203.01	232.526	0.0911542	0.000645667	phospholipase D, putative, expressed
LOC_Os06g40640.1	2792.52	1959.56	14198.6	13084.3	5.74126	0.0174832	fructose-bisphospate aldolase isozyme, putative, expressed
LOC_Os06g40640.2	253.113	178.784	1235.26	996.541	5.16745	0.0326103	fructose-bisphospate aldolase isozyme, putative, expressed
LOC_Os06g40818.1	55.5901	95.2729	871.394	941.776	12.0186	0.000403771	aspartic proteinase, putative, expressed
LOC_Os06g40890.1	0	0	15.4838	25.138	6599	0.027572	polygalacturonase, putative, expressed
LOC_Os06g41020.1	105.266	90.5681	524.729	571.889	5.59971	0.0251709	DUF1680 domain containing protein, putative, expressed
LOC_Os06g41100.1	4.73108	0	43.0106	37.707	17.0611	0.0293994	transcription factor, putative, expressed
LOC_Os06g41360.1	126.556	116.445	607.309	589.844	4.92654	0.0446068	phosphoribosyl transferase, putative, expressed
LOC_Os06g41700.1	21.2898	29.4052	150.537	199.308	6.90097	0.0173433	expansin precursor, putative, expressed
LOC_Os06g41740.1	225.909	312.872	38.7095	30.5247	0.128502	0.00932494	transposon protein, putative, CACTA, En/Spm sub-class, expressed
LOC_Os06g41910.1	27.2037	24.7004	138.494	213.673	6.78495	0.0159071	expressed protein
LOC_Os06g41930.1	47.3108	35.2863	634.836	374.376	12.2185	0.00055778	zinc-binding protein, putative, expressed
LOC_Os06g42020.1	27.2037	16.4669	463.654	459.666	21.1428	2.75e-05	CSLA9 - cellulose synthase-like family A, expressed
LOC_Os06g42560.1	134.836	84.687	559.137	535.08	4.98453	0.0410102	tryptophan synthase beta chain 2, putative, expressed
LOC_Os06g42754.1	2.36554	2.35242	61.075	35.9114	20.5569	0.00785115	expressed protein
LOC_Os06g43220.1	13.0105	21.1718	257.203	247.789	14.7735	0.000329156	AP2 domain containing protein, expressed
LOC_Os06g43304.1	10.6449	14.1145	668.384	500.964	47.2284	1.99e-07	cytochrome P450, putative, expressed
LOC_Os06g43320.1	0	0	24.9461	25.138	6599	0.000383791	cytochrome P450, putative, expressed
LOC_Os06g43620.1	285.047	311.695	1021.93	2120.57	5.26609	0.0288343	haemolysin-III, putative, expressed
LOC_Os06g44010.1	1609.75	1906.63	207.311	200.206	0.115891	0.00266507	WRKY28, expressed
LOC_Os06g44100.1	0	0	213.332	140.054	6599	1.09e-08	HLS, putative, expressed
LOC_Os06g44180.1	16.5588	54.1056	209.031	208.286	5.90562	0.0270833	NAD dependent epimerase/dehydratase family protein, putative, expressed
LOC_Os06g44410.1	1594.37	1571.42	128.171	181.352	0.0977715	0.00104679	histidine kinase, putative, expressed
LOC_Os06g44750.1	0	0	23.2257	30.5247	6599	0.00125048	AP2 domain containing protein, expressed
LOC_Os06g44860.1	2.36554	0	159.139	140.054	126.48	4.62e-07	OsSPL10 - SBP-box gene family member, expressed
LOC_Os06g44930.1	1.18277	3.52863	62.7954	83.494	31.0501	0.000344744	expressed protein
LOC_Os06g44970.1	0	1.17621	28.387	34.1158	53.1392	0.00390276	auxin efflux carrier component, putative, expressed
LOC_Os06g44980.1	0	0	10.3225	26.9335	6599	0.0110167	expressed protein
LOC_Os06g45180.1	234.188	290.524	0.860211	1.79557	0.00506141	2.9e-08	pollen allergen, putative, expressed
LOC_Os06g45190.1	33.1175	19.9956	0	0	0	0.0183304	pollen allergen, putative, expressed
LOC_Os06g45290.1	48.4935	58.8104	0.860211	0	0.00801658	0.00109562	pollen allergen, putative, expressed
LOC_Os06g45640.1	18.9243	11.7621	128.171	173.272	9.82337	0.00368511	core histone H2A/H2B/H3/H4, putative, expressed
LOC_Os06g45940.1	14.1932	5.88104	114.408	260.358	18.6689	0.00019992	potassium transporter, putative, expressed
LOC_Os06g45990.2	10614.2	12204.3	1766.87	2292.04	0.177878	0.0195246	patellin-5, putative, expressed
LOC_Os06g46436.1	30.752	15.2907	244.3	221.753	10.1222	0.00312105	photosystem I iron-sulfur center, putative, expressed
LOC_Os06g46740.1	0	0	22.3655	9.87563	6599	0.0173673	early nodulin 20 precursor, putative, expressed
LOC_Os06g46754.1	4.73108	0	350.966	606.902	202.463	4.87e-10	RIC10, putative, expressed
LOC_Os06g46799.1	416.335	424.611	1771.17	2665.52	5.27584	0.0278295	peroxidase precursor, putative, expressed
LOC_Os06g46910.1	8.27938	2.35242	159.999	171.477	31.1778	3.34e-05	ZOS6-07 - C2H2 zinc finger protein, expressed
LOC_Os06g46920.1	10.6449	15.2907	163.44	137.361	11.598	0.00286453	dihydroflavonol-4-reductase, putative, expressed
LOC_Os06g46970.1	14414.4	16670.4	4281.27	2125.06	0.206092	0.0403545	wound induced protein, putative, expressed
LOC_Os06g46990.1	158.491	104.683	541.073	819.677	5.17054	0.0342843	expressed protein
LOC_Os06g47200.1	184.512	175.255	1060.64	987.563	5.69314	0.0209386	LTPL85 - Protease inhibitor/seed storage/LTP family protein precursor, expressed
LOC_Os06g47250.1	594.933	659.853	59.3546	102.347	0.128868	0.00592815	DUF292 domain containing protein, expressed
LOC_Os06g47800.1	263.757	164.669	37.8493	47.5826	0.199408	0.0495402	disease resistance protein RGA3, putative, expressed
LOC_Os06g48180.1	104.084	159.964	1090.75	738.877	6.92913	0.00826907	glycosyl hydrolases family 16, putative, expressed
LOC_Os06g48250.1	2.36554	0	553.976	356.42	384.858	2.13e-10	ATPase, putative, expressed
LOC_Os06g48650.1	348.917	336.396	1792.68	1859.31	5.32894	0.0270532	OsSub52 - Putative Subtilisin homologue, expressed
LOC_Os06g48950.1	35.4831	57.6342	208.171	297.167	5.42689	0.0385183	auxin response factor 19, putative, expressed
LOC_Os06g48960.1	27.2037	21.1718	144.515	165.192	6.40217	0.0284225	AIG2-like family domain containing protein, expressed
LOC_Os06g49190.1	62.6868	71.7487	3.44084	4.48892	0.0589857	0.000666738	LTPL154 - Protease inhibitor/seed storage/LTP family protein precursor, expressed
LOC_Os06g49200.1	21.2898	17.6431	3.44084	0	0.0883787	0.0305643	expressed protein
LOC_Os06g49660.1	1.18277	0	11.1827	25.138	30.7082	0.00953536	transferase family protein, putative, expressed
LOC_Os06g49830.1	0	0	55.9137	40.4003	6599	0.000165069	SHI, putative, expressed
LOC_Os06g50040.1	105.266	92.9205	843.867	697.579	7.77774	0.00513793	OsSAUR29 - Auxin-responsive SAUR gene family member, expressed
LOC_Os06g50400.1	4.73108	12.9383	111.827	125.69	13.4423	0.00175872	expansin precursor, putative, expressed
LOC_Os06g50410.1	0	0	30.9676	30.5247	6599	0.00227726	DUF677 domain containing protein, putative, expressed
LOC_Os06g50900.1	151.394	204.66	763.007	1054.9	5.10569	0.0359481	expressed protein
LOC_Os06g50940.1	2539.4	1831.36	96.3436	97.8585	0.0444321	9.24e-06	GDSL-like lipase/acylhydrolase, putative, expressed
LOC_Os06g50950.1	15302.7	16491.6	1014.19	1240.74	0.0709224	0.000119713	GDSL-like lipase/acylhydrolase, putative, expressed
LOC_Os06g51070.1	28.3865	14.1145	143.655	122.099	6.25289	0.0412958	no apical meristem protein, putative, expressed
LOC_Os06g51110.1	55.5901	54.1056	480.858	811.597	11.7822	0.000533139	cyclin, putative, expressed
LOC_Os06g51310.1	14.1932	18.8193	252.902	344.749	18.1037	9.38e-05	PAZ domain containing protein, putative, expressed
LOC_Os07g01110.1	21.2898	23.5242	218.494	320.509	12.0275	0.00135054	laccase precursor protein, putative, expressed
LOC_Os07g01214.1	44.9452	30.5814	1242.14	1949.09	42.2531	1.73e-07	transposon protein, putative, unclassified, expressed
LOC_Os07g01340.1	0	0	73.1179	283.7	6599	1.16e-08	gibberellin 2-beta-dioxygenase 7, putative, expressed
LOC_Os07g01400.1	0	1.17621	34.4084	35.0136	59.0219	0.00582978	peroxidase precursor, putative, expressed
LOC_Os07g01560.1	25414.2	26748.2	6283.84	3506.75	0.187695	0.0258669	transporter family protein, putative, expressed
LOC_Os07g01710.1	66.2351	76.4536	363.009	468.644	5.82844	0.0231271	phytosulfokine receptor precursor, putative, expressed
LOC_Os07g01840.1	959.226	1086.82	133.333	189.433	0.157751	0.0134462	expressed protein
LOC_Os07g02060.1	2.36554	2.35242	67.9567	55.6626	26.2019	0.00165208	WRKY29, expressed
LOC_Os07g02140.1	4.73108	2.35242	37.8493	40.4003	11.0468	0.0168605	flavin-containing monooxygenase family protein, putative, expressed
LOC_Os07g02250.1	509.773	466.955	78.2792	87.0851	0.169304	0.0214101	expressed protein
LOC_Os07g02260.1	61.504	64.6915	0	3.59114	0.0284569	0.00172881	expressed protein
LOC_Os07g02540.1	7.09661	8.23346	100.645	70.925	11.1917	0.00802022	HLS, putative, expressed
LOC_Os07g02720.1	33.1175	28.229	0	0	0	0.00800263	expressed protein
LOC_Os07g02780.1	0	0	12.043	23.3424	6599	0.0152199	STE_MEKK_ste11_MAP3K.20 - STE kinases include homologs to sterile 7, sterile 11 and sterile 20 from yeast, expressed
LOC_Os07g03140.1	47.3108	44.6959	222.795	285.495	5.52449	0.0368319	ternary complex factor MIP1, putative, expressed
LOC_Os07g03150.1	47.3108	27.0528	221.934	295.371	6.95644	0.0126046	H-BTB5 - Bric-a-Brac, Tramtrack, Broad Complex BTB domain with H family conserved sequence, expressed
LOC_Os07g03250.1	8.27938	7.05725	233.117	323.202	36.2739	5.06e-06	AP2-like ethylene-responsive transcription factor PLETHORA 2, putative, expressed
LOC_Os07g03260.1	0	7.05725	31.8278	44.8892	10.8707	0.0270833	CSLC10 - cellulose synthase-like family C, expressed
LOC_Os07g03279.1	15067.3	20389.6	1425.37	1089.01	0.0709138	0.000121368	SCP-like extracellular protein, expressed
LOC_Os07g03710.1	0	5.88104	182.365	301.656	82.3018	3.61e-07	SCP-like extracellular protein, expressed
LOC_Os07g03730.1	4.73108	7.05725	2979.77	3501.36	549.792	3.34e-14	SCP-like extracellular protein, expressed
LOC_Os07g03770.1	0	0	253.762	318.714	6599	2.02e-10	Homeobox domain containing protein, expressed
LOC_Os07g04040.1	7.09661	0	69.6771	97.8585	23.6078	0.00122942	expressed protein
LOC_Os07g04930.1	9.46215	11.7621	960.856	756.832	80.9305	8.4e-09	retrotransposon protein, putative, unclassified, expressed
LOC_Os07g04940.1	13.0105	18.8193	348.385	416.572	24.0327	2.09e-05	uncharacterized PE-PGRS family protein PE_PGRS54 precursor, putative, expressed
LOC_Os07g04950.1	9.46215	2.35242	117.849	241.504	30.4161	2.22e-05	retrotransposon protein, putative, unclassified, expressed
LOC_Os07g04960.1	2.36554	0	73.1179	184.046	108.713	9.4e-07	app1, putative, expressed
LOC_Os07g04970.1	0	1.17621	46.4514	43.0937	76.1302	0.00476668	transferase family protein, putative, expressed
LOC_Os07g05024.1	0	2.35242	80.8598	110.427	81.3152	2.11e-05	expressed protein
LOC_Os07g05190.1	350.1	343.453	2114.4	2990.52	7.36054	0.00539883	leucine-rich repeat family protein, putative, expressed
LOC_Os07g05360.1	295.692	109.387	742.362	2982.44	9.19523	0.00167308	photosystem II 10 kDa polypeptide, chloroplast precursor, putative, expressed
LOC_Os07g05420.1	0	2.35242	497.202	560.218	449.503	5.6e-11	anthocyanidin 3-O-glucosyltransferase, putative, expressed
LOC_Os07g05460.1	13.0105	3.52863	118.709	125.69	14.7771	0.000810911	flavonol sulfotransferase, putative, expressed
LOC_Os07g05830.1	1128.36	1249.13	204.73	110.427	0.132559	0.00616291	zinc-finger protein, putative, expressed
LOC_Os07g06800.1	29.5692	23.5242	135.913	238.811	7.05783	0.0174266	3-oxo-5-alpha-steroid 4-dehydrogenase, putative, expressed
LOC_Os07g07320.1	221.178	229.361	18.0644	22.4446	0.0899125	0.0011378	glutathione S-transferase, putative, expressed
LOC_Os07g07450.1	17.7415	11.7621	127.311	115.814	8.24053	0.01094	versicolorin reductase, putative, expressed
LOC_Os07g07860.1	0	0	12.043	23.3424	6599	0.0103835	LTPL76 - Protease inhibitor/seed storage/LTP family protein precursor, expressed
LOC_Os07g07920.1	14.1932	1.17621	90.3222	184.046	17.8515	0.000325038	LTPL100 - Protease inhibitor/seed storage/LTP family protein precursor, expressed
LOC_Os07g08000.1	2.36554	0	117.849	115.814	98.778	1.23e-06	expressed protein
LOC_Os07g09280.1	1.18277	0	35.2687	37.707	61.699	0.00123069	expressed protein
LOC_Os07g09710.1	10.6449	9.40967	86.0211	57.4582	7.15444	0.0289481	OsFBX220 - F-box domain containing protein, expressed
LOC_Os07g10590.1	113.546	78.806	10.3225	3.59114	0.0723345	0.00625557	transporter family protein, putative, expressed
LOC_Os07g10600.2	43.7625	63.5153	7.7419	7.18228	0.139117	0.0498911	cycloartenol-C-24-methyltransferase 1, putative, expressed
LOC_Os07g11739.1	0	1.17621	49.032	18.8535	57.7155	0.00446033	cytochrome P450, putative, expressed
[truncated: 838 more rows]

## Sheet: DETs-SA+Sub vs NP+Sub
Table S2-C: List of differentially expressed genes in SA+sub compared with NP+Sub. Genes with significantly increased and decreased expression (Fold change > |2|, FDR<0.05) are given.
[truncated: 2,406 more rows]
