# Supplementary material for: Comparative Transcriptional Profiling of Primed and Non-primed Rice Seedlings under Submergence Stress
Source: Front Plant Sci. 2016 Jul 28;7:1125. doi: 10.3389/fpls.2016.01125 (PMC4964843; doi:10.3389/fpls.2016.01125)
Supplement: Table S3 — A list of 1628 DETs overlapped in seed priming treatments (Se+Sub and SA+Sub) compared with NP+Sub. [file DataSheet3.XLS]

## Sheet: Overlapped DETs in priming trts
Table S3: List of DETs overlapped in seed priming treatments (Se+Sub and SA+Sub) compared with NP+Sub (FDR<0.005).
MSU_ID	foldChange_Se+SubvsNP+Sub	pval_Se+SubvsNP+Sub	padj_Se+SubvsNP+Sub	foldChange_SA+SubvsNP+Sub	pval_SA+SubvsNP+Sub	padj_SA+SubvsNP+Sub	NP+Sub-R1	NP+Sub-R2	SA+Sub-R1	SA+Sub-R2	Se+Sub-R1	Se+Sub-R2	Putative Function
LOC_Os01g01360.1	8.06397	0.000196032	0.00488302	5.04621	0.0034431	0.0475369	75.6972	52.9294	276.414	372.663	383.654	653.587	peptide transporter PTR2, putative, expressed
LOC_Os01g01430.1	6599	9.43e-05	0.00270976	2645	0.000323168	0.00738224	0	0	22.1436	20.8136	30.9676	27.8313	No apical meristem protein, putative, expressed
LOC_Os01g01660.1	6599	1.55e-05	0.000616944	2645	1.68e-06	9.8e-05	0	0	33.5973	44.6006	23.2257	28.7291	isoflavone reductase, putative, expressed
LOC_Os01g01890.1	11.3784	2e-05	0.000766603	18.9603	5.85e-07	4.03e-05	55.5901	25.8766	700.197	844.439	380.213	546.751	expressed protein
LOC_Os01g02010.1	42.3769	4.19e-09	5.91e-07	35.8366	1.48e-08	1.83e-06	7.09661	14.1145	409.276	350.858	427.525	471.337	expressed protein
LOC_Os01g03180.1	17.5051	0.000564022	0.0113287	17.6592	0.000566678	0.0114125	2.36554	2.35242	39.7059	43.6095	41.2901	41.2981	retrotransposon protein, putative, unclassified, expressed
LOC_Os01g03230.1	6599	0.00263097	0.0388886	2645	0.00065296	0.0128958	0	0	18.3258	16.8491	6.88169	17.0579	retrotransposon protein, putative, unclassified, expressed
LOC_Os01g03490.1	10.0841	2.76e-05	0.000988292	11.7489	1.01e-05	0.000423794	264.94	179.96	2474.74	2752.36	1886.44	2599.98	heavy-metal-associated domain-containing protein, putative, expressed
LOC_Os01g03720.1	24.472	1.02e-06	6.15e-05	15.679	1.83e-05	0.000691639	2.36554	15.2907	151.951	124.882	261.504	170.579	MYB family transcription factor, putative, expressed
LOC_Os01g03914.2	6599	0.000313069	0.00719508	2645	0.00061098	0.0121549	0	0	17.5622	21.8048	14.6236	32.3202	cation efflux family protein, putative, expressed
LOC_Os01g04170.1	10.893	3.14e-05	0.00109562	10.0558	5.72e-05	0.00175708	36.6658	47.0484	377.969	463.847	313.977	597.924	expressed protein
LOC_Os01g04350.1	38.4892	1.59e-09	2.59e-07	14.8425	2.42e-06	0.000132666	78.0627	55.2818	875.056	1104.11	1795.26	3337.07	hsp20/alpha crystallin family protein, putative, expressed
LOC_Os01g04590.1	9.77297	0.000395045	0.00859585	6.92508	0.00251512	0.0372265	8.27938	7.05725	52.6866	53.5208	42.1503	107.734	expressed protein
LOC_Os01g04950.3	22.3883	0.00038348	0.00840545	16.2437	0.00157307	0.0257574	2.36554	1.17621	29.7794	27.7515	55.0535	24.2402	peptide transporter PTR2, putative, expressed
LOC_Os01g07480.1	23.218	6.03e-06	0.000276122	29.5104	1.35e-06	8.12e-05	3.54831	5.88104	140.498	137.766	85.1609	133.77	DUF260 domain containing protein, putative, expressed
LOC_Os01g07530.1	24.3233	8.49e-08	7.7e-06	6.05808	0.00106819	0.019026	40.2141	41.1673	277.941	215.074	784.512	1194.95	uncharacterized glycosyltransferase, putative, expressed
LOC_Os01g07850.1	8.28813	0.000310311	0.00714174	6.08233	0.00162582	0.0264751	11.8277	21.1718	131.335	69.3788	110.107	163.397	glyoxalase family protein, putative, expressed
LOC_Os01g08150.1	9.21646	6.43e-05	0.00198196	20.3133	2.38e-07	1.9e-05	86.3421	54.1056	1421.77	1431.19	517.847	776.584	expressed protein
LOC_Os01g08530.1	6599	0.0001071	0.00300183	2645	3.44e-05	0.00115854	0	0	25.9615	29.7338	10.3225	33.218	retrotransposon protein, putative, unclassified, expressed
LOC_Os01g08810.1	110.919	9.38e-07	5.76e-05	83.2929	4.88e-06	0.000235087	0	1.17621	50.3959	47.574	75.6986	54.7649	cytochrome P450, putative, expressed
LOC_Os01g09450.1	5.27495	0.0019696	0.0308278	6.90631	0.000365531	0.00814492	173.867	155.26	1305.71	967.338	785.373	950.754	OsIAA2 - Auxin-responsive Aux/IAA gene family member, expressed
LOC_Os01g09470.1	12.3461	8.7e-05	0.00254227	6.52185	0.00284414	0.0410003	8.27938	11.7621	70.2488	60.4587	90.3222	157.112	IQ calmodulin-binding motif family protein, expressed
LOC_Os01g09540.1	12.0329	5.12e-05	0.00163792	22.4317	6.16e-07	4.23e-05	10.6449	4.70484	211.51	132.811	87.7415	96.9607	HAD superfamily phosphatase, putative, expressed
LOC_Os01g09580.1	6.81771	0.000527064	0.0107656	16.4369	1.45e-06	8.63e-05	43.7625	59.9867	826.187	879.128	249.461	457.87	CAMK_CAMK_like_Aur_like.1 - CAMK includes calcium/calmodulin depedent protein kinases, expressed
LOC_Os01g09580.2	9.35594	0.000733893	0.0140588	16.8542	2.57e-05	0.000912646	10.6449	2.35242	113.009	106.05	52.4729	69.1294	CAMK_CAMK_like_Aur_like.1 - CAMK includes calcium/calmodulin depedent protein kinases, expressed
LOC_Os01g09590.1	22.3185	2.36e-06	0.000124432	25.5743	9.46e-07	6.13e-05	14.1932	1.17621	227.545	165.518	224.515	118.508	myb-like DNA-binding domain containing protein, putative, expressed
LOC_Os01g10140.2	7.38089	0.00300995	0.0431439	13.402	0.00015076	0.00393664	3.54831	10.5859	79.4117	110.015	36.9891	67.3338	RNA-dependent RNA polymerase, putative, expressed
LOC_Os01g10320.1	8.6434	0.000393535	0.00857409	6.0647	0.00272932	0.0396601	14.1932	21.1718	108.428	106.05	113.548	192.126	class III HD-Zip protein 8, putative, expressed
LOC_Os01g10400.1	14.5954	1.96e-06	0.000106991	13.5549	3.54e-06	0.000181268	164.405	176.431	2276.98	2343.02	2445.58	2529.06	expressed protein
LOC_Os01g10400.2	14.106	5.04e-06	0.000236878	10.4861	4.02e-05	0.00132039	24.8381	43.5197	345.135	371.672	389.676	574.582	expressed protein
LOC_Os01g10980.1	6599	2.03e-09	3.21e-07	2645	1.03e-05	0.00043152	0	0	26.7251	35.6805	148.817	121.201	auxin-induced protein 5NG4, putative, expressed
LOC_Os01g10990.1	6599	2.93e-05	0.00103699	2645	0.000431734	0.00924789	0	0	13.7443	16.8491	35.2687	17.9557	integral membrane protein DUF6 containing protein, expressed
LOC_Os01g11010.1	13.551	1.33e-05	0.000540121	14.3044	8.76e-06	0.000377038	14.1932	19.9956	277.941	211.11	204.73	258.562	peptide-N4-asparagine amidase A, putative, expressed
LOC_Os01g11150.1	13.4157	6.32e-06	0.000287811	7.31389	0.00034805	0.00780329	62.6868	63.5153	487.924	435.104	886.878	806.211	gibberellin 2-beta-dioxygenase, putative, expressed
LOC_Os01g12190.1	29.2005	2.64e-07	2.02e-05	20.6539	2.92e-06	0.000154446	9.46215	7.05725	158.823	182.367	178.924	303.451	expressed protein
LOC_Os01g12740.1	6599	5.89e-05	0.00184038	2645	0.00211748	0.0325503	0	0	15.2715	7.929	14.6236	44.8892	cytochrome P450, putative, expressed
LOC_Os01g12770.1	11.2892	2.11e-05	0.000800513	10.912	2.49e-05	0.000894075	63.8695	52.9294	745.248	529.261	664.083	654.485	cytochrome P450, putative, expressed
LOC_Os01g13130.1	6599	5.93e-07	3.95e-05	2645	6.12e-05	0.00185559	0	0	30.543	19.8225	73.1179	60.1516	aquaporin protein, putative, expressed
LOC_Os01g13140.1	386.537	3.17e-11	9.32e-09	133.216	5.59e-08	5.68e-06	1.18277	0	83.2296	74.3344	262.364	194.819	WD domain, G-beta repeat domain containing protein, expressed
LOC_Os01g13480.1	7.81228	0.000155008	0.0040046	6.45491	0.000493825	0.0102616	341.82	195.251	2049.43	1417.31	2375.04	1820.71	glutaredoxin, putative, expressed
LOC_Os01g13560.1	14.1853	0.0016321	0.0266029	13.0843	0.00254089	0.0374552	3.54831	2.35242	33.5973	43.6095	77.419	6.28449	membrane associated DUF588 domain containing protein, putative, expressed
LOC_Os01g14510.1	12.1323	0.000206835	0.00512203	9.11487	0.000957752	0.0174955	0	9.40967	48.1052	37.6628	37.8493	76.3117	BRASSINOSTEROID INSENSITIVE 1 precursor, putative, expressed
LOC_Os01g14520.1	6599	0.000608042	0.0120433	2645	0.000777892	0.014834	0	0	22.1436	15.858	23.2257	17.9557	C4-dicarboxylate transporter/malic acid transport protein domain containing protein, expressed
LOC_Os01g14890.1	13.2442	0.000974944	0.0176555	10.0062	0.00318835	0.0448925	5.91384	2.35242	45.0509	37.6628	62.7954	46.6848	expressed protein
LOC_Os01g16146.1	10.5657	4.25e-05	0.00140504	8.09514	0.000252492	0.00596377	35.4831	38.8149	293.212	308.24	526.449	258.562	phenazine biosynthesis protein, putative, expressed
LOC_Os01g16400.1	11.0798	0.000833996	0.0156059	9.31675	0.00171959	0.0276301	4.73108	4.70484	54.2138	33.6983	31.8278	72.7205	NB-ARC domain containing protein, expressed
LOC_Os01g16650.1	8.34384	0.000115254	0.00318127	14.9613	2.13e-06	0.000119797	130.105	87.0395	1537.07	1711.67	717.416	1094.4	ubiquitin-conjugating enzyme, putative, expressed
LOC_Os01g16810.1	9.41806	0.00117943	0.0206012	8.85624	0.00181549	0.0287747	10.6449	4.70484	52.6866	83.2545	81.72	62.8449	MYB family transcription factor, putative, expressed
LOC_Os01g16980.1	20.4546	2.15e-05	0.000812669	9.10506	0.00166755	0.027024	4.73108	4.70484	44.2873	41.6273	82.5803	110.427	expressed protein
LOC_Os01g17402.1	17.0355	0.00075611	0.0143833	33.5153	2.87e-05	0.00100005	2.36554	1.17621	47.3416	71.361	16.344	43.9914	cyclin, putative, expressed
LOC_Os01g18080.1	50.2551	7.46e-09	9.6e-07	52.2566	6.05e-09	8.41e-07	2.36554	7.05725	226.781	265.622	196.128	277.415	retrotransposon protein, putative, unclassified, expressed
LOC_Os01g19170.1	27.5009	6.44e-08	6.02e-06	7.06768	0.000724119	0.0139388	14.1932	31.7576	137.443	187.323	666.664	597.027	polygalacturonase, putative, expressed
LOC_Os01g19390.1	51.8789	3.33e-06	0.000168239	24.547	0.000208564	0.00512638	2.36554	0	31.3065	26.7604	67.9567	54.7649	glycerol-3-phosphate acyltransferase, putative, expressed
LOC_Os01g19480.1	9.45416	8.31e-05	0.00244813	9.17453	0.000106831	0.00295489	27.2037	52.9294	346.663	388.521	332.041	425.55	kelch motif family protein, putative, expressed
LOC_Os01g19694.1	57.7537	3.18e-08	3.28e-06	64.7847	1.53e-08	1.87e-06	4.73108	1.17621	182.494	200.207	143.655	197.513	Homeobox domain containing protein, expressed
LOC_Os01g19940.1	8.22636	0.00019717	0.00490388	7.09343	0.000494851	0.0102699	46.128	25.8766	264.96	245.799	271.827	320.509	expressed protein
LOC_Os01g19990.1	29.5748	0.000257144	0.00614308	28.9251	0.000326754	0.00743816	0	2.35242	24.4344	43.6095	30.9676	38.6047	expressed protein
LOC_Os01g20830.1	22.9355	2.14e-05	0.000810911	9.3924	0.00234964	0.0352565	3.54831	5.88104	32.0701	56.4942	125.591	90.6762	heavy metal-associated domain containing protein, expressed
LOC_Os01g21300.1	13.5478	0.00019014	0.00476167	21.7264	1.28e-05	0.000508435	5.91384	2.35242	82.466	97.1303	46.4514	65.5383	esterase/lipase/thioesterase family protein, putative, expressed
LOC_Os01g21310.1	6.86485	0.000564338	0.0113287	9.78601	6.1e-05	0.00185208	60.3212	23.5242	406.221	414.29	223.655	351.932	expressed protein
LOC_Os01g21630.1	8.1588	0.00190773	0.0300901	11.6596	0.000279398	0.00648671	7.09661	2.35242	52.6866	57.4853	23.2257	53.8671	pectinacetylesterase domain containing protein, expressed
LOC_Os01g22352.1	181.094	3.09e-12	1.31e-09	115.265	8.87e-11	2.59e-08	2.36554	2.35242	343.608	200.207	376.772	477.621	peroxidase precursor, putative, expressed
LOC_Os01g22380.1	37.1862	4.53e-06	0.00021858	23.4776	6.62e-05	0.00197322	3.54831	1.17621	43.5237	67.3965	88.6017	87.0851	expressed protein
LOC_Os01g22590.1	6599	2.07e-06	0.000111907	2645	8.31e-07	5.47e-05	0	0	55.7409	69.3788	63.6556	38.6047	retrotransposon protein, putative, unclassified, expressed
LOC_Os01g22640.1	15.6753	2.29e-06	0.000121633	9.92832	4.92e-05	0.00155881	29.5692	27.0528	325.283	236.879	233.977	653.587	GDSL-like lipase/acylhydrolase, putative, expressed
LOC_Os01g22780.1	104.836	1.04e-08	1.27e-06	60.0561	4.76e-07	3.37e-05	2.36554	0	68.7217	73.3433	98.0641	149.93	GDSL-like lipase/acylhydrolase, putative, expressed
LOC_Os01g22954.1	6.18335	0.00260413	0.0386052	8.09306	0.000661953	0.0130482	18.9243	17.6431	134.389	161.553	105.806	120.303	serine carboxypeptidase, putative, expressed
LOC_Os01g22980.1	53.1969	3.01e-08	3.15e-06	100.246	2.94e-10	6.86e-08	3.54831	2.35242	329.864	261.657	130.752	183.148	OsSCP3 - Putative Serine Carboxypeptidase homologue, expressed
LOC_Os01g23190.1	68.8447	0.000106607	0.00299572	41.0179	0.000961844	0.0175529	1.18277	0	16.7986	31.716	47.3116	34.1158	retrotransposon protein, putative, Ty3-gypsy subclass
LOC_Os01g24030.1	4.98209	0.00291169	0.0420638	6.19662	0.00082315	0.0154891	100.535	138.793	843.749	639.276	861.071	331.282	AMP-binding enzyme, putative, expressed
LOC_Os01g25010.1	6599	5.45e-08	5.21e-06	2645	1.82e-09	3.13e-07	0	0	135.916	104.068	41.2901	99.6541	flavonol synthase/flavanone 3-hydroxylase, putative, expressed
LOC_Os01g25990.2	5.79967	0.00142656	0.0237743	15.1462	2.66e-06	0.000142252	63.8695	36.4625	860.548	659.098	305.375	276.518	expressed protein
LOC_Os01g26270.1	6599	0.000324934	0.00741544	2645	0.00159878	0.0261117	0	0	17.5622	15.858	26.6665	27.8313	OsWAK7 - OsWAK receptor-like protein kinase, expressed
LOC_Os01g26280.1	17.1088	0.000835668	0.0156238	19.4166	0.000501299	0.0103708	4.73108	0	44.2873	47.574	37.8493	43.0937	OsWAK8 - OsWAK receptor-like protein kinase, expressed
LOC_Os01g27190.1	10.24	0.00145818	0.0242642	14.3715	0.000274351	0.0064014	5.91384	2.35242	60.3224	58.4764	35.2687	49.3781	C2 domain containing protein, putative, expressed
LOC_Os01g28500.1	6599	3.67e-07	2.64e-05	2645	5.49e-06	0.000257833	0	0	37.4151	35.6805	64.5158	55.6626	SCP-like extracellular protein, expressed
LOC_Os01g29330.1	23.1859	3.33e-05	0.00114892	12.8959	0.000548396	0.0111266	7.09661	0	68.7217	22.7959	76.5588	87.9829	expressed protein
LOC_Os01g32460.1	76.1406	1.73e-09	2.78e-07	591.575	1.53e-16	5.54e-13	4.73108	0	1593.58	1205.21	241.719	118.508	expressed protein
LOC_Os01g32830.1	19.8966	2.46e-05	0.000904528	21.7246	1.64e-05	0.000630644	5.91384	2.35242	72.5395	107.042	57.6341	106.836	expressed protein
LOC_Os01g33040.1	10.2129	3.12e-05	0.00109168	18.5508	4.41e-07	3.18e-05	87.5249	61.1629	1373.67	1384.6	525.589	992.95	kinesin motor domain containing protein, expressed
LOC_Os01g33160.1	6599	0.000381856	0.00838108	2645	0.00040334	0.00880127	0	0	8.39931	21.8048	7.7419	21.5468	stress responsive A/B Barrel domain containing protein, expressed
LOC_Os01g33869.1	27.7602	1.07e-05	0.000446526	10.1617	0.00175143	0.0279904	4.73108	3.52863	44.2873	39.645	94.6232	134.668	expressed protein
LOC_Os01g36460.1	27.9637	2.91e-07	2.18e-05	18.8471	4.15e-06	0.000206759	2.36554	12.9383	159.587	128.846	150.537	277.415	MYB family transcription factor, putative, expressed
LOC_Os01g37000.1	6599	2.26e-20	1.85e-16	2645	1.13e-18	1.23e-14	0	0	1156.05	1189.35	1585.37	2182.51	carboxyl-terminal peptidase, putative, expressed
LOC_Os01g37050.1	40.9172	7.55e-09	9.68e-07	26.6342	1.64e-07	1.38e-05	20.1071	4.70484	393.241	267.604	640.857	374.376	ribonuclease III domain protein, putative, expressed
LOC_Os01g37630.1	12.6707	0.000185402	0.00466444	25.7711	3.12e-06	0.000163017	3.54831	8.23346	125.226	178.403	55.9137	93.3696	esterase, putative, expressed
LOC_Os01g38229.1	54.5963	1.41e-10	3.34e-08	85.3685	3.71e-12	2.02e-09	36.6658	18.8193	2650.37	2086.32	1311.82	1717.46	peptidyl-prolyl isomerase, putative, expressed
LOC_Os01g38229.2	33.5584	1.31e-07	1.1e-05	58.3933	2.24e-09	3.62e-07	4.73108	5.88104	345.135	274.542	171.182	184.944	peptidyl-prolyl isomerase, putative, expressed
LOC_Os01g38359.1	419.093	5.86e-16	9.12e-13	202.345	2.05e-13	2.16e-10	0	7.05725	758.993	669.01	1328.17	1629.48	peptidyl-prolyl cis-trans isomerase, FKBP-type, putative, expressed
LOC_Os01g38580.1	21.6922	3.47e-05	0.00119238	32.6121	4.17e-06	0.000206816	3.54831	2.35242	52.6866	139.749	49.8922	78.1073	beta,beta-carotene 9,10-dioxygenase, putative, expressed
LOC_Os01g41810.1	40.1987	1.07e-07	9.24e-06	31.1826	5.62e-07	3.9e-05	8.27938	1.17621	167.986	126.864	177.203	202.899	cytochrome P450 72A1, putative, expressed
LOC_Os01g42070.1	9.48522	6.6e-05	0.002023	18.2629	6.93e-07	4.71e-05	36.6658	49.4008	781.9	789.927	322.579	493.781	kinesin motor domain containing protein, putative, expressed
LOC_Os01g42090.1	42.2253	1.2e-06	6.97e-05	48.073	4.81e-07	3.4e-05	2.36554	2.35242	143.552	83.2545	84.3007	114.916	nodulin MtN3 family protein, putative, expressed
LOC_Os01g42320.1	11.3989	2.61e-05	0.000944268	8.8875	0.000118281	0.0032198	74.5144	12.9383	474.943	302.293	465.374	531.488	aspartic proteinase nepenthesin-2 precursor, putative, expressed
LOC_Os01g42900.1	52.4673	5.59e-08	5.33e-06	30.2983	2.1e-06	0.000118755	3.54831	2.35242	98.5011	80.2812	147.096	162.499	ABC-2 type transporter domain containing protein, expressed
LOC_Os01g43270.1	6599	1.12e-06	6.61e-05	2645	2.93e-05	0.00102021	0	0	19.0894	26.7604	36.9891	42.1959	hydroquinone glucosyltransferase, putative, expressed
LOC_Os01g43440.1	9.46736	0.00162425	0.0265145	10.7996	0.000848552	0.0158847	4.73108	5.88104	61.0859	53.5208	43.0106	57.4582	TOO MANY MOUTHS precursor, putative, expressed
LOC_Os01g43460.1	40.1047	4.84e-07	3.36e-05	18.0216	6.6e-05	0.00197112	0	7.05725	58.7952	68.3877	179.784	103.245	C4-dicarboxylate transporter/malic acid transport protein, expressed
LOC_Os01g43760.1	35.9501	1.16e-05	0.000478052	20.288	0.000215045	0.00524505	0	4.70484	48.8687	46.5829	94.6232	74.5161	cytochrome P450 72A1, putative, expressed
LOC_Os01g44069.1	550.633	7.85e-15	9.35e-12	210.105	1.66e-11	6.38e-09	0	2.35242	240.526	253.728	374.192	921.127	glycerol-3-phosphate acyltransferase, putative, expressed
LOC_Os01g44960.1	9.50182	0.000135017	0.00357576	6.20252	0.00163078	0.0265293	9.46215	24.7004	113.773	98.1214	91.1824	233.424	hydrolase, alpha/beta fold family domain containing protein, expressed
LOC_Os01g44970.1	15.1307	2.7e-06	0.00014034	7.51632	0.000329012	0.00747392	59.1384	36.4625	299.321	419.246	427.525	1018.99	polygalacturonase, putative, expressed
LOC_Os01g45570.1	29.3155	0.000459187	0.00962157	23.5787	0.00111526	0.01965	2.36554	0	29.0158	26.7604	36.1289	33.218	homeobox associated leucine zipper, putative, expressed
LOC_Os01g45760.1	6599	0.000127745	0.0034389	2645	0.00189895	0.0297425	0	0	12.9808	13.8758	22.3655	33.218	YUC4, putative, expressed
LOC_Os01g46120.1	15.2747	0.00120115	0.0209137	66.918	1.46e-07	1.26e-05	2.36554	0	64.1402	94.1569	15.4838	20.649	GDSL-like lipase/acylhydrolase, putative, expressed
LOC_Os01g47630.1	7.46646	0.00038403	0.00840712	6.39629	0.00086577	0.0161423	56.7729	52.9294	429.129	272.56	342.364	476.724	expressed protein
LOC_Os01g48570.1	6599	2.35e-05	0.00087128	2645	6.71e-06	0.000303465	0	0	48.8687	26.7604	26.6665	33.218	expressed protein
LOC_Os01g49640.1	100.058	4.72e-06	0.000223972	86.5676	1.04e-05	0.0004353	1.18277	0	48.8687	53.5208	65.376	52.9693	LTPL149 - Protease inhibitor/seed storage/LTP family protein precursor, expressed
LOC_Os01g50460.1	35.2124	1.11e-08	1.33e-06	13.2725	1.16e-05	0.000471647	22.4726	19.9956	306.957	256.702	418.063	1077.34	nodulin MtN3 family protein, putative, expressed
LOC_Os01g50720.1	19.0369	5.47e-07	3.71e-05	5.42472	0.00213008	0.0326979	42.5797	50.577	266.487	238.861	836.125	937.287	MYB family transcription factor, putative, expressed
LOC_Os01g52100.1	48.204	3.24e-07	2.37e-05	36.238	2.14e-06	0.000120091	2.36554	2.35242	74.8303	96.1392	75.6986	151.726	DUF581 domain containing protein, expressed
LOC_Os01g52130.1	64.9004	5.7e-09	7.77e-07	52.4818	2.83e-08	3.13e-06	5.91384	0	145.843	164.527	153.978	229.833	sulfate transporter, putative, expressed
LOC_Os01g52330.1	103.188	9.21e-08	8.22e-06	38.132	2.5e-05	0.000895582	2.36554	0	56.5045	33.6983	146.236	97.8585	NB-ARC domain containing protein, expressed
LOC_Os01g52680.1	29.2536	0.00249947	0.0373896	50.2484	0.000307487	0.0070735	1.18277	0	26.7251	32.7071	9.46232	25.138	OsMADS32 - MADS-box family gene with MIKCc type-box, expressed
LOC_Os01g52750.1	13.6184	4.31e-06	0.000210518	5.03835	0.00287732	0.0414055	59.1384	76.4536	328.337	354.823	1011.61	834.94	OsSub3 - Putative Subtilisin homologue, expressed
LOC_Os01g52790.1	34.601	3.4e-07	2.47e-05	25.9051	2.29e-06	0.000126498	7.09661	2.35242	129.808	114.971	181.505	145.441	cytochrome P450 72A1, putative, expressed
LOC_Os01g52880.1	79.3043	7.24e-09	9.39e-07	57.9389	7.01e-08	6.79e-06	3.54831	1.17621	119.118	154.616	198.709	175.966	leucine-rich repeat family protein, putative, expressed
LOC_Os01g53260.1	60.5621	1.85e-06	0.000102197	31.6078	7.12e-05	0.00209631	2.36554	0	35.1244	39.645	49.8922	93.3696	WRKY23, expressed
LOC_Os01g53750.1	10.4241	2.33e-05	0.000864399	6.76015	0.000448699	0.00954867	182.146	198.779	1156.81	1418.3	2057.62	1913.18	glucan endo-1,3-beta-glucosidase precursor, putative, expressed
LOC_Os01g54210.1	8.08546	0.000165154	0.00422	5.50723	0.00185066	0.0291636	74.5144	91.7443	432.946	482.678	794.835	549.444	GATA zinc finger domain containing protein, expressed
LOC_Os01g55100.1	14.5923	2.1e-06	0.000113099	10.9593	1.82e-05	0.000687828	152.577	152.907	1500.42	1847.46	2399.99	2057.72	slTCP3, putative, expressed
LOC_Os01g55120.1	16.3286	0.00260589	0.0386052	21.3056	0.00105418	0.0188277	3.54831	0	29.0158	46.5829	30.1074	27.8313	expressed protein
LOC_Os01g55220.1	38.5997	8.59e-06	0.000373784	23.3039	0.000153505	0.00399553	2.36554	1.17621	29.0158	53.5208	76.5588	60.1516	expressed protein
LOC_Os01g55750.1	66.4781	3.62e-11	1.06e-08	35.221	6.05e-09	8.41e-07	36.6658	12.9383	785.718	961.392	1623.22	1674.37	TCP family transcription factor, putative, expressed
LOC_Os01g55750.2	57.8639	2.87e-09	4.24e-07	30.6301	3e-07	2.33e-05	5.91384	4.70484	155.769	169.482	300.214	314.225	TCP family transcription factor, putative, expressed
LOC_Os01g55750.3	59.4225	2.45e-09	3.68e-07	25.0992	1.21e-06	7.49e-05	4.73108	5.88104	130.571	135.784	300.214	330.385	TCP family transcription factor, putative, expressed
LOC_Os01g56020.1	11.5133	3.05e-05	0.00106904	17.539	1.9e-06	0.000109122	26.0209	19.9956	348.19	458.891	203.01	326.794	expressed protein
LOC_Os01g57890.1	46.9228	2.81e-05	0.0010015	32.9513	0.000156973	0.00406958	0	2.35242	35.888	41.6273	42.1503	68.2316	Homeobox domain containing protein, expressed
LOC_Os01g58290.1	7.92164	0.000125972	0.00340361	8.39804	8.19e-05	0.00235884	1115.35	578.695	8148.1	6078.57	7286.85	6132.77	OsSub9 - Putative Subtilisin homologue, expressed
LOC_Os01g58910.1	6599	4.59e-05	0.00149503	2645	2.17e-09	3.52e-07	0	0	91.6289	104.068	10.3225	29.6269	auxin-induced protein 5NG4, putative, expressed
LOC_Os01g59120.1	6.68035	0.000441434	0.00935571	12.4439	6.76e-06	0.000305567	179.781	154.083	2132.66	2021.9	919.566	1310.77	cyclin, putative, expressed
LOC_Os01g60740.1	5.00108	0.00225314	0.0344248	8.41967	9.47e-05	0.00266806	1868.77	1307.94	11266.5	15480.4	6129	9758.02	LTPL16 - Protease inhibitor/seed storage/LTP family protein precursor, expressed
LOC_Os01g60850.1	85.4247	2.35e-09	3.57e-07	38.4239	5.73e-07	3.96e-05	1.18277	4.70484	112.245	113.979	386.235	116.712	expressed protein
LOC_Os01g60930.1	11.5112	2.88e-05	0.00102367	6.91309	0.000689073	0.0134223	50.8591	21.1718	268.014	229.941	481.718	347.443	expressed protein
LOC_Os01g61160.1	31.1021	1.67e-08	1.89e-06	31.2613	1.53e-08	1.87e-06	26.0209	22.348	846.04	666.036	644.298	860.078	laccase precursor protein, putative, expressed
LOC_Os01g61370.1	131.274	2.11e-07	1.66e-05	61.1549	1.84e-05	0.000694796	1.18277	0	36.6516	35.6805	62.7954	92.4718	expressed protein
LOC_Os01g61940.1	119.336	2.57e-09	3.82e-07	185.337	8.88e-11	2.59e-08	2.36554	0	274.887	163.536	114.408	167.886	white-brown complex homolog protein, putative, expressed
LOC_Os01g62200.1	62.3476	6.59e-10	1.25e-07	28.5457	2.13e-07	1.72e-05	5.91384	9.40967	218.382	219.039	428.385	527	domain of unknown function DUF966 domain containing protein, expressed
LOC_Os01g62260.1	29.6833	8.96e-09	1.11e-06	15.8597	1.26e-06	7.69e-05	133.653	239.947	2430.46	3494.71	5913.95	5175.73	thaumatin, putative, expressed
LOC_Os01g62600.1	26.2998	0.00201566	0.0313984	108.28	1.9e-06	0.000109122	0	1.17621	74.8303	52.5297	11.1827	19.7513	laccase precursor protein, putative, expressed
LOC_Os01g62830.1	18.2495	3.69e-05	0.00125217	9.57586	0.00119069	0.020634	5.91384	7.05725	58.7952	65.4143	191.827	44.8892	expressed protein
LOC_Os01g62990.1	8.10981	0.000296367	0.00689129	8.89557	0.000180347	0.00455271	36.6658	16.4669	219.909	252.737	206.451	224.446	ATROPGEF7/ROPGEF7, putative, expressed
LOC_Os01g63190.1	5.21712	0.00187259	0.0296359	9.69831	3.36e-05	0.00113796	354.831	157.612	2948.92	2020.9	1441.71	1231.76	laccase precursor protein, putative, expressed
LOC_Os01g63540.1	6599	2.57e-08	2.75e-06	2645	1.82e-11	6.76e-09	0	0	226.781	138.758	56.7739	74.5161	cytochrome P450, putative, expressed
LOC_Os01g64410.1	6599	3.99e-05	0.00133628	2645	3.81e-05	0.0012666	0	0	25.9615	28.7426	24.0859	29.6269	ATOFP18/OFP18, putative, expressed
LOC_Os01g64590.1	10.018	0.00131981	0.0224183	8.41575	0.0028875	0.0415164	1.18277	10.5859	53.4502	45.5918	55.0535	62.8449	dof zinc finger domain containing protein, putative, expressed
LOC_Os01g64660.1	494.363	4.46e-16	7.28e-13	1881.05	6.53e-21	2.13e-16	3.54831	1.17621	5196.12	3690.95	564.298	1771.33	fructose-1,6-bisphosphatase, putative, expressed
LOC_Os01g64660.2	6599	2.99e-11	9.04e-09	2645	2.97e-16	8.09e-13	0	0	781.136	567.915	56.7739	248.686	fructose-1,6-bisphosphatase, putative, expressed
LOC_Os01g64670.1	141.267	6.63e-10	1.25e-07	517.249	3.12e-14	5.36e-11	0	2.35242	689.507	527.279	58.4944	273.824	soluble inorganic pyrophosphatase, putative, expressed
LOC_Os01g65110.1	33.1286	5.83e-09	7.88e-07	32.4735	5.72e-09	8.06e-07	65.0523	39.9911	2325.85	1085.28	2031.82	1448.13	POT family protein, expressed
LOC_Os01g65310.1	4.92116	0.003372	0.0472963	5.06173	0.00301694	0.0430167	100.535	81.1584	445.927	473.758	453.331	440.812	DUF803 domain containing, putative, expressed
LOC_Os01g66020.1	35.5836	7.92e-06	0.000349437	18.6079	0.000239859	0.00571916	1.18277	3.52863	45.0509	42.6184	67.0965	100.552	protein kinase family protein, putative, expressed
LOC_Os01g66490.1	11.5442	1.63e-05	0.000645667	11.1333	2.29e-05	0.000828131	59.1384	68.2201	649.802	768.122	706.233	764.015	no apical meristem protein, putative, expressed
LOC_Os01g66544.1	23.3892	7.27e-05	0.00218865	14.5874	0.00069392	0.0134766	3.54831	2.35242	50.3959	35.6805	108.387	29.6269	expressed protein
LOC_Os01g66610.1	60.0635	1.75e-09	2.8e-07	60.5927	1.6e-09	2.79e-07	3.54831	7.05725	341.318	301.302	235.698	401.31	serine/threonine-protein kinase receptor precursor, putative, expressed
LOC_Os01g66710.1	6599	3.54e-05	0.00121354	2645	1.77e-07	1.47e-05	0	0	64.9038	63.432	17.2042	31.4225	polygalacturonase, putative, expressed
LOC_Os01g66850.1	20.4844	1.75e-06	9.73e-05	27.9212	1.92e-07	1.58e-05	3.54831	16.4669	303.139	255.71	129.892	280.109	pectinacetylesterase domain containing protein, expressed
LOC_Os01g66860.2	35.9054	5.71e-08	5.43e-06	11.3421	0.00013254	0.00353168	9.46215	5.88104	77.8846	96.1392	192.687	358.216	serine/threonine protein kinase, putative, expressed
LOC_Os01g66890.1	28.4094	5.73e-05	0.00180052	16.2251	0.000800555	0.0151775	2.36554	1.17621	36.6516	20.8136	39.5697	61.0493	BTBZ1 - Bric-a-Brac, Tramtrack, and Broad Complex BTB domain with TAZ zinc finger and Calmodulin-binding domains, expressed
LOC_Os01g67110.1	5.07082	0.00251663	0.0375725	8.34329	0.000114064	0.00312323	156.125	102.33	1185.07	971.303	559.137	751.446	expressed protein
LOC_Os01g67410.1	6599	9.18e-05	0.00265775	2645	3.09e-05	0.00106448	0	0	32.8337	41.6273	25.8063	30.5247	AP2/EREBP transcription factor BABY BOOM, putative, expressed
LOC_Os01g68050.1	130.687	1.53e-09	2.53e-07	61.7858	2.71e-07	2.15e-05	1.18277	1.17621	86.2839	59.4675	135.913	172.375	transmembrane amino acid transporter protein, putative, expressed
LOC_Os01g68300.1	25.0281	2.84e-06	0.000146179	14.5725	9.72e-05	0.00273389	4.73108	8.23346	51.1595	137.766	176.343	148.134	expressed protein
LOC_Os01g68470.1	16.1071	1.08e-05	0.000449538	6.04483	0.00300932	0.04294	21.2898	9.40967	102.319	83.2545	251.182	243.3	expressed protein
LOC_Os01g68730.1	20.9674	5.74e-07	3.86e-05	11.9772	2.66e-05	0.000941072	26.0209	19.9956	302.375	248.772	643.438	321.407	RNA-binding protein FUS, putative, expressed
LOC_Os01g68740.1	43.4156	1.77e-09	2.83e-07	25.328	1.08e-07	9.8e-06	34.3003	8.23346	558.936	518.359	1174.19	672.441	keratin, type I cytoskeletal 9, putative, expressed
LOC_Os01g68900.1	51.9485	3.42e-08	3.49e-06	31.1493	1.21e-06	7.49e-05	3.54831	2.35242	91.6289	92.1747	114.408	192.126	zinc finger, C3HC4 type family protein, expressed
LOC_Os01g69030.1	27.1898	4.27e-08	4.24e-06	20.6271	3.08e-07	2.38e-05	35.4831	32.9339	818.551	592.693	800.856	1059.39	sucrose-phosphate synthase, putative, expressed
LOC_Os01g70520.1	236.465	1.24e-11	4.27e-09	263.529	5.23e-12	2.67e-09	1.18277	1.17621	345.135	276.524	239.999	317.816	Os1bglu5 - beta-glucosidase homologue, similar to G. max isohydroxyurate hydrolase, expressed
LOC_Os01g70560.1	13.717	5.12e-06	0.000240022	19.6043	4e-07	2.91e-05	37.8486	49.4008	852.149	858.315	512.686	684.112	expressed protein
LOC_Os01g70890.1	94.1125	5.98e-06	0.000274448	39.5343	0.000462408	0.00974103	1.18277	0	16.0351	30.7249	61.9352	49.3781	histone-like transcription factor and archaeal histone, putative, expressed
LOC_Os01g71340.1	350.015	1.04e-12	4.87e-10	116.574	3.38e-09	5.19e-07	2.36554	0	148.897	126.864	426.665	401.31	glycosyl hydrolases family 17, putative, expressed
LOC_Os01g71350.1	67.0656	1.16e-09	1.97e-07	13.4246	7.69e-05	0.00223467	9.46215	2.35242	66.4309	92.1747	481.718	310.633	glycosyl hydrolases family 17, putative, expressed
LOC_Os01g71400.1	279.469	1.33e-11	4.43e-09	77.521	9.22e-08	8.66e-06	2.36554	0	113.009	70.3699	444.729	216.366	glycosyl hydrolases family 17, putative, expressed
LOC_Os01g71474.1	6599	6.37e-09	8.43e-07	2645	1.27e-06	7.76e-05	0	0	36.6516	33.6983	50.7525	105.939	glycosyl hydrolases family 17, putative, expressed
LOC_Os01g71710.1	10.9053	0.000932035	0.0170262	10.497	0.00107291	0.0190788	7.09661	1.17621	51.1595	35.6805	51.6127	38.6047	amino acid permease family protein, putative, expressed
LOC_Os01g71780.1	8.6388	0.000357821	0.00797832	11.7974	5.59e-05	0.00172722	18.9243	11.7621	168.75	193.269	76.5588	188.535	WD domain, G-beta repeat domain containing protein, expressed
LOC_Os01g72120.1	6599	4.74e-06	0.000224983	2645	0.00283214	0.0408814	0	0	15.2715	3.9645	55.0535	32.3202	glutathione S-transferase, putative, expressed
LOC_Os01g72130.1	23.1724	5.37e-05	0.00170181	13.352	0.00100673	0.0181189	4.73108	0	27.4887	35.6805	59.3546	50.2759	glutathione S-transferase, putative, expressed
LOC_Os01g72170.1	97.2546	1.3e-08	1.51e-06	18.2145	0.000278377	0.00646762	3.54831	0	35.888	28.7426	177.203	167.886	glutathione S-transferase, putative, expressed
LOC_Os01g72260.1	14.3782	8.44e-06	0.0003677	6.11341	0.00172245	0.0276489	24.8381	14.1145	122.172	115.962	188.386	371.683	cytochrome P450, putative, expressed
LOC_Os01g72290.1	38.5528	2.22e-09	3.41e-07	46.1246	5.64e-10	1.15e-07	44.9452	14.1145	1365.27	1358.83	1024.51	1252.41	expressed protein
LOC_Os01g72470.1	6599	6.56e-06	0.000297713	2645	2.02e-05	0.000745464	0	0	19.8529	36.6716	34.4084	33.218	expressed protein
LOC_Os01g72490.1	11.7357	1.08e-05	0.000450762	7.00403	0.000369673	0.00821479	157.308	142.321	959.813	1138.8	1711.82	1804.55	LRP1, putative, expressed
LOC_Os01g72590.1	61.152	0.000139201	0.00366281	70.047	8.76e-05	0.00249832	0	1.17621	32.8337	49.5563	38.7095	33.218	expressed protein
LOC_Os01g72740.1	11.8172	7.52e-05	0.00225353	20.1888	1.91e-06	0.000109489	4.73108	8.23346	152.715	109.024	89.4619	63.7427	cytochrome P450, putative, expressed
LOC_Os01g72760.1	6599	6.54e-05	0.00200496	2645	1.87e-05	0.000701546	0	0	37.4151	21.8048	20.6451	26.0358	cytochrome P450, putative, expressed
LOC_Os01g72910.1	6599	2.11e-07	1.66e-05	2645	2.17e-05	0.000794412	0	0	39.7059	18.8314	106.666	41.2981	abscisic stress-ripening, putative, expressed
LOC_Os01g73170.1	14.5129	2.7e-06	0.00014034	7.42745	0.0002564	0.00602992	53.2246	85.8633	554.355	478.714	896.34	1122.23	peroxidase precursor, putative, expressed
LOC_Os01g73250.1	6599	1.12e-11	4.06e-09	2645	2.05e-13	2.16e-10	0	0	235.944	436.095	153.118	225.344	abscisic stress-ripening, putative, expressed
LOC_Os01g74140.1	7.51344	0.00242438	0.0364616	10.8645	0.00040073	0.00876064	9.46215	5.88104	72.5395	94.1569	53.3331	61.9471	WRKY17, expressed
LOC_Os01g74146.1	7.28268	0.000376144	0.00828354	14.5039	3.86e-06	0.000195634	56.7729	32.9339	682.635	618.462	294.192	359.114	WD repeat-containing protein, putative, expressed
LOC_Os01g74300.1	86.3493	1.87e-12	8.24e-10	63.4952	2.61e-11	9.09e-09	98.1698	62.3391	4547.08	5644.46	7485.56	6374.27	metallothionein, putative, expressed
LOC_Os02g01140.1	7.74831	0.00021096	0.00519546	8.22929	0.000155414	0.00403878	63.8695	102.33	615.441	752.264	547.094	740.672	GDSL-like lipase/acylhydrolase, putative, expressed
LOC_Os02g01150.1	5.11444	0.00202501	0.0315237	9.50806	3.64e-05	0.00121242	561.815	471.66	5632.89	4193.45	2457.62	2828.02	erythronate-4-phosphate dehydrogenase domain containing protein, expressed
LOC_Os02g01150.2	5.09637	0.0030164	0.0431795	10.802	2.69e-05	0.000948426	68.6006	45.8722	742.958	493.58	270.966	312.429	erythronate-4-phosphate dehydrogenase domain containing protein, expressed
LOC_Os02g01210.1	6599	0.000458098	0.00961535	2645	0.00339854	0.0470274	0	0	4.58144	14.8669	16.344	13.4668	amino acid transporter, putative, expressed
LOC_Os02g01380.1	6.48885	0.000534139	0.0108897	5.08725	0.00263694	0.0385406	188.06	170.55	736.085	1088.26	1235.26	1091.71	expressed protein
LOC_Os02g02340.1	17.6416	8.56e-07	5.45e-05	6.32119	0.000807655	0.0152716	54.4074	50.577	367.279	296.347	987.522	864.567	glycerol-3-phosphate acyltransferase, putative, expressed
LOC_Os02g02400.1	14.4993	4.76e-06	0.000225608	15.1479	4.03e-06	0.000202736	10.6449	21.1718	225.254	256.702	352.687	108.632	catalase isozyme A, putative, expressed
LOC_Os02g02970.1	12.6787	2.36e-05	0.000872012	5.87879	0.00278421	0.0403143	30.752	19.9956	103.082	195.252	376.772	266.642	expressed protein
LOC_Os02g03200.1	84.4541	4.82e-09	6.64e-07	47.052	3.12e-07	2.4e-05	0	3.52863	84.7567	81.2723	104.086	193.921	FAD-binding and arabino-lactone oxidase domains containing protein, putative, expressed
LOC_Os02g06960.1	25.7328	1.81e-07	1.46e-05	16.0971	5.18e-06	0.000246222	11.8277	18.8193	233.654	259.675	361.289	427.345	expressed protein
LOC_Os02g07030.1	49.0734	1.35e-07	1.13e-05	28.6291	5.03e-06	0.000240457	2.36554	3.52863	65.6674	103.077	140.214	149.032	DUF640 domain containing protein, putative, expressed
LOC_Os02g07650.1	238.386	2.2e-09	3.41e-07	233.11	2.86e-09	4.52e-07	1.18277	0	119.118	156.598	122.15	159.806	zinc-binding protein, putative, expressed
LOC_Os02g08070.1	6599	7.62e-05	0.00227567	2645	0.00144201	0.0240944	0	0	10.69	14.8669	23.2257	27.8313	OsSPL5 - SBP-box gene family member, expressed
LOC_Os02g09220.1	7.39933	0.000228249	0.00554604	5.39799	0.00156753	0.0256795	288.596	154.083	1327.09	1062.49	1943.22	1332.31	cytochrome P450, putative, expressed
LOC_Os02g09250.1	22.105	2.56e-07	1.98e-05	8.94403	0.000123068	0.00331969	43.7625	22.348	330.628	260.666	765.588	695.783	cytochrome P450 71D10, putative, expressed
LOC_Os02g10020.1	9.65769	0.000116112	0.00319686	19.0973	1.25e-06	7.66e-05	24.8381	11.7621	345.135	353.832	149.677	203.797	Mad3/BUB1 homology region 1 domain containing protein, expressed
LOC_Os02g10350.1	108.428	1.55e-08	1.77e-06	96.498	3.22e-08	3.5e-06	0	2.35242	122.935	104.068	79.9996	175.068	MLO domain containing protein, putative, expressed
LOC_Os02g10760.1	22.9115	2.4e-07	1.86e-05	32.0051	2.05e-08	2.42e-06	17.7415	17.6431	556.645	575.844	307.956	502.759	AP2 domain containing protein, expressed
LOC_Os02g11705.1	6599	1.2e-05	0.000492289	2645	0.000607815	0.0120993	0	0	22.9072	9.91125	55.0535	32.3202	expressed protein
LOC_Os02g11770.1	61.5894	7.77e-11	1.98e-08	63.1135	6.28e-11	1.97e-08	23.6554	17.6431	1433.99	1172.5	1271.39	1272.16	expressed protein
LOC_Os02g12790.1	20.1394	2.31e-06	0.000122569	10.9117	0.000134165	0.00357183	8.27938	9.40967	83.9931	109.024	127.311	228.935	GATA zinc finger domain containing protein, expressed
LOC_Os02g13060.1	7.83316	0.000137117	0.0036255	6.50464	0.000451906	0.00959276	566.546	477.541	3823.98	2967.43	5495.03	2683.48	expressed protein
LOC_Os02g14190.1	16.1408	5.17e-06	0.000241419	15.375	8.25e-06	0.000358926	23.6554	12.9383	230.599	332.027	269.246	321.407	spermidine synthase, putative, expressed
LOC_Os02g14490.1	20.5752	2.04e-06	0.000110362	10.7535	0.00012901	0.00345713	15.376	4.70484	116.827	99.1125	201.289	211.877	MYB family transcription factor, putative, expressed
LOC_Os02g15810.1	17.3411	5.33e-07	3.65e-05	19.489	2.4e-07	1.91e-05	249.564	211.718	4159.19	4830.75	3292.03	4707.08	HMG1/2, putative, expressed
LOC_Os02g17620.1	6599	0.00349401	0.0486112	2645	1.41e-07	1.23e-05	0	0	64.9038	48.5651	6.88169	9.87563	isochorismatase family protein, putative, expressed
LOC_Os02g17780.1	7.04112	0.00224752	0.034355	9.53055	0.000418628	0.00903106	11.8277	4.70484	83.2296	74.3344	27.5268	88.8807	ent-kaurene synthase, chloroplast precursor, putative, expressed
LOC_Os02g19530.1	6599	9.44e-08	8.4e-06	2645	2.49e-06	0.000134883	0	0	55.7409	24.7781	72.2577	77.2095	lectin-like receptor kinase, putative, expressed
LOC_Os02g19640.1	158.311	3.3e-10	6.92e-08	107.645	5.15e-09	7.48e-07	2.36554	0	146.606	108.033	182.365	192.126	IQ calmodulin-binding motif family protein, putative, expressed
LOC_Os02g19820.1	9.49324	3.92e-05	0.00131761	5.58757	0.00124131	0.0213864	449.452	497.536	2571.72	2719.65	3544.93	5445.06	nodulin MtN3 family protein, putative, expressed
LOC_Os02g20360.1	46.1429	6.85e-10	1.27e-07	18.5647	5.21e-07	3.67e-05	26.0209	43.5197	909.417	381.583	901.501	2307.31	tyrosine aminotransferase, putative, expressed
LOC_Os02g20540.1	774.65	2.08e-14	1.98e-11	407.823	4.17e-12	2.23e-09	0	1.17621	186.312	293.373	331.181	579.969	fasciclin domain containing protein, expressed
LOC_Os02g20560.1	241.002	5.95e-13	3.09e-10	118.687	1.6e-10	4.08e-08	1.18277	2.35242	218.382	201.198	246.881	605.107	fasciclin domain containing protein, expressed
LOC_Os02g26140.1	11.2606	0.000175938	0.00446069	15.3794	2.74e-05	0.000961085	14.1932	2.35242	130.571	123.891	71.3975	114.916	microtubule-binding protein TANGLED1, putative, expressed
LOC_Os02g26210.1	87.7928	5.6e-10	1.11e-07	44.6597	7.08e-08	6.83e-06	4.73108	2.35242	165.696	150.651	314.837	307.042	flowering promoting factor-like 1, putative, expressed
LOC_Os02g26650.3	7.08567	0.000306466	0.00708318	12.6247	6.82e-06	0.000306873	134.836	182.312	1730.26	2273.64	903.222	1343.98	delta14-sterol reductase, putative, expressed
LOC_Os02g29960.1	12.0638	2.55e-05	0.000933074	8.81633	0.00017133	0.00436558	18.9243	25.8766	234.417	160.562	184.945	355.523	cytochrome P450, putative, expressed
LOC_Os02g30110.1	6599	6.91e-09	9.07e-07	2645	3.65e-07	2.71e-05	0	0	58.7952	47.574	139.354	66.4361	cytochrome P450, putative, expressed
LOC_Os02g30240.1	6.67444	0.00107939	0.0191716	6.18066	0.00163987	0.0266375	18.9243	38.8149	189.366	167.5	179.784	205.593	expressed protein
LOC_Os02g30650.1	4.6794	0.00361064	0.049873	5.15756	0.00228358	0.0345029	285.047	250.533	1207.21	1555.08	1222.36	1283.83	heavy metal-associated domain containing protein, expressed
LOC_Os02g30850.1	15.2497	6.03e-05	0.00187267	11.7034	0.000313823	0.00719393	3.54831	9.40967	56.5045	95.148	100.645	96.9607	OsGrx_C8 - glutaredoxin subgroup III, expressed
LOC_Os02g31840.1	6599	0.000325153	0.00741544	2645	0.00213589	0.0327563	0	0	12.2172	17.8403	24.9461	26.9335	expressed protein
LOC_Os02g32504.1	6.2162	0.00132299	0.0224456	5.82061	0.00192141	0.0300454	18.9243	37.6387	165.696	163.536	130.752	220.855	heparan-alpha-glucosaminide N-acetyltransferase, putative, expressed
LOC_Os02g32580.1	18.7065	3.23e-06	0.000164356	9.95759	0.000162042	0.00417566	11.8277	11.7621	149.661	85.2368	276.988	164.295	expressed protein
LOC_Os02g33420.1	11.3443	5.4e-05	0.00170803	5.83032	0.00293225	0.0420294	16.5588	27.0528	104.61	149.66	245.16	249.584	ATPase, AAA family protein, expressed
LOC_Os02g33670.1	10.8394	0.00330493	0.0465153	11.5092	0.00252976	0.0373417	3.54831	2.35242	38.1787	29.7338	36.1289	27.8313	expressed protein
LOC_Os02g34440.1	80.4083	5.86e-08	5.52e-06	40.3352	4.41e-06	0.000216659	3.54831	0	61.8495	81.2723	168.601	116.712	retrotransposon protein, putative, Ty3-gypsy subclass, expressed
LOC_Os02g34810.1	9.95561	2.92e-05	0.0010343	13.0428	4.16e-06	0.000206759	308.703	219.951	3951.5	2943.64	2748.37	2514.69	OsAPx8 - Thylakoid-bound Ascorbate Peroxidase encoding gene 5,8, expressed
LOC_Os02g35230.1	56.5349	3.57e-08	3.64e-06	121.456	1.48e-10	3.86e-08	0	4.70484	254.27	317.16	97.2038	168.783	expressed protein
LOC_Os02g35320.1	13.1283	1.18e-05	0.000485236	8.78794	0.000157186	0.00407187	44.9452	24.7004	337.5	274.542	525.589	388.741	expressed protein
LOC_Os02g35660.1	23.1348	9.86e-05	0.00282126	10.8985	0.0033121	0.0462182	0	4.70484	27.4887	23.787	56.7739	52.0715	PTF1, putative, expressed
LOC_Os02g36140.2	10.6223	6.43e-05	0.00198196	9.59329	0.000123005	0.00331969	26.0209	15.2907	209.983	186.332	230.537	208.286	terpene synthase, putative, expressed
LOC_Os02g36550.1	8.92965	9.49e-05	0.0027262	5.26939	0.0025266	0.037314	59.1384	31.7576	215.328	263.639	203.87	607.8	phosphopantothenate--cysteine ligase, putative, expressed
LOC_Os02g36590.1	318.224	7.28e-14	5.66e-11	77.9088	4.95e-09	7.25e-07	1.18277	2.35242	126.753	148.669	471.396	653.587	CPuORF19 - conserved peptide uORF-containing transcript, expressed
LOC_Os02g36590.3	6599	4.7e-05	0.00152229	2645	0.000754698	0.0144427	0	0	16.0351	7.929	17.2042	26.9335	CPuORF19 - conserved peptide uORF-containing transcript, expressed
LOC_Os02g36890.1	19.2152	5.89e-07	3.95e-05	8.56316	0.00016185	0.00417566	44.9452	25.8766	276.414	330.045	579.782	781.073	MYB family transcription factor, putative, expressed
LOC_Os02g37070.1	6.12442	0.0015711	0.0257627	6.26473	0.00142854	0.0239062	29.5692	47.0484	235.181	244.808	212.472	256.766	expressed protein
LOC_Os02g37190.1	10.0452	3.25e-05	0.00112493	5.68453	0.00114482	0.0200411	229.457	76.4536	1039.22	699.735	1463.22	1609.73	expressed protein
LOC_Os02g37654.1	6599	0.00127365	0.0218499	2645	0.00309548	0.0437736	0	0	9.92646	6.93788	3.44084	17.9557	lecithin:cholesterol acyltransferase, putative, expressed
LOC_Os02g37690.1	11.9952	2.52e-05	0.000923079	16.7518	2.19e-06	0.000121705	4.73108	24.7004	287.867	205.163	98.0641	254.971	UDP-glucoronosyl and UDP-glucosyl transferase, putative, expressed
LOC_Os02g37760.1	6599	4.09e-06	0.000201515	2645	1.68e-05	0.000644207	0	0	35.888	34.6894	52.4729	42.1959	lecithine cholesterol acyltransferase, putative, expressed
LOC_Os02g37770.1	6599	1.36e-13	1.01e-10	2645	1.06e-10	3e-08	0	0	133.625	145.695	271.827	415.674	lecithin cholesterol acyltransferase, putative, expressed
LOC_Os02g37780.1	6599	1.14e-10	2.77e-08	2645	3.29e-07	2.49e-05	0	0	54.2138	45.5918	132.472	217.264	lecithine cholesterol acyltransferase, putative, expressed
LOC_Os02g37790.1	6599	0.000343785	0.00777524	2645	0.0016638	0.0269859	0	0	9.92646	22.7959	24.9461	25.138	retrotransposon protein, putative, unclassified, expressed
LOC_Os02g37800.1	107.839	4.7e-13	2.52e-10	72.1276	1.12e-11	4.74e-09	41.3969	28.229	2980.23	2041.72	3159.56	4348.87	lecithin:cholesterol acyltransferase, putative, expressed
LOC_Os02g39390.1	6.9785	0.000687533	0.0133507	17.0654	2.08e-06	0.000118013	18.9243	32.9339	436.001	448.98	141.935	219.957	expressed protein
LOC_Os02g40070.1	35.0878	9.7e-05	0.00278164	53.4485	1.2e-05	0.000485302	2.36554	0	67.9581	58.4764	31.8278	51.1737	AP2-like ethylene-responsive transcription factor PLETHORA 2, putative, expressed
LOC_Os02g40100.1	72.2536	4.04e-11	1.15e-08	47.2154	1.05e-09	1.98e-07	17.7415	7.05725	687.217	483.669	723.437	1068.36	plant protein of unknown function DUF869 domain containing protein, expressed
LOC_Os02g40410.1	7.22796	0.000764498	0.0145077	10.2947	9.43e-05	0.00266137	9.46215	27.0528	178.676	197.234	103.225	160.703	expressed protein
LOC_Os02g40440.1	36.4281	2.2e-09	3.41e-07	22.3541	1.05e-07	9.62e-06	94.6215	75.2774	1756.22	2041.72	2965.15	3223.94	GDSL-like lipase/acylhydrolase, putative, expressed
LOC_Os02g40730.1	29.1541	1.14e-05	0.000472364	31.366	7.14e-06	0.000317837	0	4.70484	80.1753	67.3965	45.5912	91.574	ammonium transporter protein, putative, expressed
LOC_Os02g40784.1	15.3905	1.16e-06	6.78e-05	9.73104	3.44e-05	0.00115854	721.489	675.144	6317.81	7272.88	12349.2	9145.73	WAX2, putative, expressed
LOC_Os02g41460.1	38.2887	2.49e-08	2.68e-06	38.6476	2.78e-08	3.09e-06	9.46215	5.88104	235.181	357.796	280.429	307.042	DUF640 domain containing protein, putative, expressed
LOC_Os02g41710.1	6599	0.000463107	0.00969389	2645	0.00259262	0.0379778	0	0	15.2715	9.91125	11.1827	31.4225	cyclic nucleotide-gated ion channel, putative, expressed
LOC_Os02g42060.1	82.5077	7.08e-06	0.000316568	64.7675	2.57e-05	0.000912646	1.18277	0	38.9423	37.6628	47.3116	50.2759	response regulator receiver domain containing protein, expressed
LOC_Os02g42560.1	16.2141	1.93e-06	0.000105555	17.0194	1.39e-06	8.35e-05	33.1175	31.7576	561.991	542.146	459.353	592.538	expressed protein
LOC_Os02g42620.1	6599	0.00111344	0.0196482	2645	0.00134811	0.0228172	0	0	12.2172	23.787	24.9461	11.6712	protein kinase, putative, expressed
LOC_Os02g42650.1	59.3013	2.04e-09	3.23e-07	51.0936	6.61e-09	9.03e-07	7.09661	2.35242	219.146	263.639	141.075	419.265	expansin precursor, putative, expressed
LOC_Os02g42740.1	8.20774	0.000238444	0.00575523	5.38142	0.00292966	0.0420107	28.3865	37.6387	167.986	187.323	233.977	307.94	cytochrome b5-like Heme/Steroid binding domain containing protein, expressed
LOC_Os02g42870.1	36.6324	2.31e-05	0.00086024	17.3722	0.000902535	0.0166326	3.54831	0	25.9615	35.6805	45.5912	84.3917	MYB family transcription factor, putative, expressed
LOC_Os02g43410.1	6599	8.38e-18	3.34e-14	2645	1e-16	4.67e-13	0	0	935.378	451.953	525.589	1424.78	transposon protein, putative, unclassified, expressed
LOC_Os02g43540.1	14.7273	6.53e-06	0.000297022	5.44764	0.00341633	0.0472272	26.0209	25.8766	112.245	170.474	404.299	360.012	retrotransposon protein, putative, unclassified, expressed
LOC_Os02g43560.1	15.7993	0.000195782	0.00488051	17.7899	0.000125566	0.0033787	4.73108	2.35242	42.7601	83.2545	48.1718	63.7427	WRKY34, expressed
LOC_Os02g43660.1	9.66284	6.73e-05	0.00205536	7.30165	0.000410206	0.00890221	56.7729	30.5814	300.848	336.983	263.225	580.867	plastocyanin-like domain containing protein, putative, expressed
LOC_Os02g44320.1	9.89271	2.82e-05	0.00100445	9.9251	2.95e-05	0.00102656	1550.61	1146.8	12179.8	14592.3	9683.4	17001.3	LTPL113 - Protease inhibitor/seed storage/LTP family protein precursor, expressed
LOC_Os02g44730.1	6.16405	0.00145726	0.0242611	10.1847	7.42e-05	0.00217329	22.4726	31.7576	271.832	280.489	178.064	156.215	tetracycline transporter protein, putative, expressed
LOC_Os02g44740.1	19.3705	8.88e-07	5.57e-05	21.4452	4.67e-07	3.32e-05	15.376	25.8766	433.71	450.962	492.041	307.042	expressed protein
LOC_Os02g45010.1	11.295	6.89e-05	0.00209279	9.17434	0.000243272	0.00577944	21.2898	14.1145	167.223	157.589	176.343	223.548	ethylene-responsive protein related, putative, expressed
LOC_Os02g45160.1	7.5321	0.00213792	0.0329416	10.0083	0.000522476	0.010699	4.73108	14.1145	95.4468	93.1658	79.9996	61.9471	aluminum-activated malate transporter, putative, expressed
LOC_Os02g47130.1	8.77147	6.96e-05	0.0021072	11.4694	1.14e-05	0.00046705	306.337	278.762	3210.07	3500.66	2004.29	3127.88	expressed protein
LOC_Os02g47180.1	9.93802	3.09e-05	0.00108137	19.2636	2.8e-07	2.2e-05	177.415	194.074	3294.82	3861.42	1578.49	2113.38	WD repeat-containing protein, putative, expressed
LOC_Os02g47310.1	10.5936	4.48e-05	0.00146502	17.9757	1.23e-06	7.58e-05	20.1071	23.5242	358.116	426.184	188.386	273.824	Cyclopropane-fatty-acyl-phospholipid synthase, putative, expressed
LOC_Os02g47780.1	15.539	1.81e-05	0.000704469	17.8402	6.77e-06	0.000305567	4.73108	10.5859	157.296	115.962	79.9996	158.01	hydrolase, alpha/beta fold family domain containing protein, expressed
LOC_Os02g49260.1	20.1868	6.27e-05	0.00193891	23.11	2.71e-05	0.000952422	2.36554	3.52863	81.7024	54.5119	50.7525	68.2316	transporter-related, putative, expressed
LOC_Os02g49720.2	8.39622	8.8e-05	0.00256297	5.07033	0.00223137	0.0338708	497.946	671.615	2886.31	3043.75	6024.06	3795.83	aldehyde dehydrogenase, putative, expressed
LOC_Os02g50000.1	60.0088	1.46e-05	0.000585601	179.389	1.46e-08	1.81e-06	0	1.17621	126.753	84.2457	28.387	42.1959	GDSL-like lipase/acylhydrolase, putative, expressed
LOC_Os02g50040.1	10.2918	3.04e-05	0.00106707	9.02141	7.66e-05	0.0022267	99.3526	83.5108	793.353	856.332	734.62	1147.37	endoglucanase, putative, expressed
LOC_Os02g50050.1	22.5798	0.000539613	0.0109671	17.3538	0.00152081	0.0251157	1.18277	2.35242	33.5973	27.7515	22.3655	57.4582	expressed protein
LOC_Os02g51110.1	34.7889	8.01e-09	1.01e-06	18.2684	9.7e-07	6.23e-05	31.9348	17.6431	479.525	426.184	942.791	781.97	aquaporin protein, putative, expressed
LOC_Os02g51550.1	6599	3.34e-06	0.000168779	2645	0.000309506	0.00709996	0	0	12.2172	21.8048	28.387	55.6626	DUF581 domain containing protein, expressed
LOC_Os02g51680.1	17.8917	0.000279355	0.00658607	12.1292	0.0016678	0.027024	4.73108	0	33.5973	23.787	35.2687	49.3781	uncharacterized glycosyl hydrolase Rv2006/MT2062, putative, expressed
LOC_Os02g51799.1	6599	8.34e-05	0.00245563	2645	1.1e-05	0.000458505	0	0	48.8687	39.645	22.3655	33.218	MYB family transcription factor, putative, expressed
LOC_Os02g52190.1	11.1896	4.68e-05	0.00151958	6.12837	0.00171424	0.0275577	31.9348	19.9956	162.641	155.607	241.719	339.363	helix-loop-helix DNA-binding protein, putative, expressed
LOC_Os02g52630.1	6599	4.58e-06	0.000220334	2645	3.09e-06	0.00016173	0	0	46.578	50.5474	43.0106	45.787	xyloglucan fucosyltransferase, putative, expressed
LOC_Os02g52810.1	5.0864	0.00213579	0.0329244	5.0356	0.00243117	0.0362302	405.69	411.673	1889.85	2226.07	2018.92	2138.52	remorin C-terminal domain containing protein, putative, expressed
LOC_Os02g52930.1	6599	0.000834202	0.0156059	2645	2.08e-05	0.000767521	0	0	29.7794	40.6361	5.16127	24.2402	integral membrane protein DUF6 containing protein, expressed
LOC_Os02g53200.1	4.80128	0.00284148	0.0413089	5.06907	0.00217083	0.0331677	1510.4	1490.26	7274.57	7935.94	6592.66	7814.32	glucan endo-1,3-beta-glucosidase precursor, putative, expressed
LOC_Os02g53200.2	5.92413	0.00173727	0.0278859	5.69999	0.00202318	0.0313516	30.752	50.577	270.305	193.269	233.117	248.686	glucan endo-1,3-beta-glucosidase precursor, putative, expressed
LOC_Os02g53530.1	30.6786	1.82e-08	2.04e-06	11.9407	1.83e-05	0.000690059	36.6658	23.5242	342.081	376.628	1011.61	834.94	ZOS2-17 - C2H2 zinc finger protein, expressed
LOC_Os02g54100.1	8.78423	0.0016855	0.0272693	11.5597	0.000438116	0.00936005	5.91384	5.88104	67.9581	68.3877	53.3331	50.2759	expressed protein
LOC_Os02g54240.1	20.341	1.06e-05	0.000444843	7.93616	0.00187362	0.0294815	5.91384	7.05725	60.3224	42.6184	146.236	117.61	OsFBX62 - F-box domain containing protein, expressed
LOC_Os02g54450.1	6599	0.000173347	0.00440526	2645	0.000490675	0.0102157	0	0	16.0351	28.7426	25.8063	32.3202	hypro1, putative, expressed
LOC_Os02g55050.1	57.8402	0.000124878	0.00338402	51.4156	0.000209563	0.00513932	1.18277	0	32.0701	28.7426	36.9891	31.4225	OsFBX64 - F-box domain containing protein, expressed
LOC_Os02g55190.1	46.1146	1.07e-07	9.24e-06	53.0787	5.1e-08	5.27e-06	5.91384	0	110.718	203.181	128.171	144.543	expressed protein
LOC_Os02g56510.1	12.2707	1.23e-05	0.000502254	17.6921	9.51e-07	6.14e-05	39.0314	35.2863	639.875	674.956	354.407	557.524	phosphate transporter 1, putative, expressed
LOC_Os02g56540.1	10.0613	3.74e-05	0.00126594	19.4775	3.52e-07	2.62e-05	67.4178	54.1056	1156.81	1210.16	516.127	706.556	kinesin motor domain containing protein, putative, expressed
LOC_Os02g56600.1	53.8556	1.72e-07	1.4e-05	32.0098	5.2e-06	0.000246965	1.18277	2.35242	62.6131	50.5474	80.8598	109.53	no apical meristem protein, putative, expressed
LOC_Os02g56700.1	6.40254	0.000778274	0.0146937	22.3916	1.59e-07	1.36e-05	46.128	63.5153	1293.49	1161.6	371.611	330.385	dehydrogenase, putative, expressed
LOC_Os02g56920.1	8.50175	7.73e-05	0.00230177	9.08422	5.45e-05	0.00169349	3139.07	2000.73	20795.9	25895.1	20361.2	23336.1	WAX2, putative, expressed
LOC_Os02g57090.1	15.5497	6.26e-06	0.000285155	17.992	2.57e-06	0.000138522	14.1932	21.1718	289.395	346.894	276.988	272.926	anthranilate phosphoribosyltransferase, putative, expressed
LOC_Os02g57110.1	6.77062	0.000351571	0.00789311	5.99453	0.000793361	0.0150586	2159.74	1705.5	10886.3	12284	10593.5	15576.6	GDSL-like lipase/acylhydrolase, putative, expressed
LOC_Os02g57110.2	28.8248	0.00039796	0.00865318	26.1888	0.000641122	0.0126895	2.36554	0	28.2522	33.6983	42.1503	26.0358	GDSL-like lipase/acylhydrolase, putative, expressed
LOC_Os02g58100.1	106.758	1.45e-06	8.22e-05	184.776	5.6e-08	5.68e-06	0	1.17621	132.098	85.2368	43.8708	81.6984	expressed protein
LOC_Os02g58214.1	58.7332	4.12e-10	8.47e-08	15.7205	7.09e-06	0.000316352	15.376	5.88104	155.769	178.403	521.288	727.205	expressed protein
LOC_Os02g58310.1	18.3276	5.39e-07	3.67e-05	16.835	9.84e-07	6.28e-05	104.084	36.4625	1272.88	1093.21	1107.09	1468.78	expressed protein
LOC_Os02g58310.2	6599	1.09e-06	6.43e-05	2645	1.54e-06	9.13e-05	0	0	53.4502	56.4942	55.9137	61.0493	expressed protein
LOC_Os02g58310.3	12.775	0.000876343	0.0162083	16.3145	0.000276024	0.00643583	4.73108	3.52863	73.3031	61.4498	50.7525	54.7649	expressed protein
LOC_Os02g58790.1	6.52767	0.000614031	0.0121336	7.65293	0.000224338	0.0054243	115.911	55.2818	705.542	604.587	519.567	597.924	cell division inhibitor, putative, expressed
LOC_Os03g01290.1	6599	8.92e-06	0.000384586	2645	0.000203067	0.0050253	0	0	26.7251	14.8669	37.8493	49.3781	peptide transporter PTR2, putative, expressed
LOC_Os03g01300.1	8.60758	0.000179033	0.00452512	10.7314	4.4e-05	0.00142124	20.1071	21.1718	213.037	229.941	128.171	227.139	LTPL114 - Protease inhibitor/seed storage/LTP family protein precursor, expressed
LOC_Os03g01800.1	132.054	2.32e-11	7.21e-09	67.6122	3.57e-09	5.46e-07	2.36554	2.35242	200.056	118.935	206.451	416.572	glycosyl hydrolases family 16, putative, expressed
LOC_Os03g01980.1	7.26271	0.000283186	0.00665335	6.6034	0.000538133	0.0109729	117.094	152.907	875.056	907.871	1003.01	957.936	KIP1, putative, expressed
LOC_Os03g02290.1	5.02585	0.00288283	0.0417244	9.10709	7.82e-05	0.00226402	75.6972	84.687	709.36	751.273	352.687	453.381	kinesin motor domain containing protein, putative, expressed
LOC_Os03g02460.1	10.9719	2.48e-05	0.000911309	6.25026	0.000884873	0.0164141	85.1594	48.2246	445.164	388.521	738.061	725.41	retinol dehydrogenase, putative, expressed
LOC_Os03g03260.1	29.1337	5.92e-07	3.95e-05	10.0416	0.000443372	0.00945377	8.27938	3.52863	61.0859	57.4853	140.214	203.797	homeobox domain containing protein, expressed
LOC_Os03g03500.1	40.0159	2.71e-07	2.07e-05	16.8429	6.82e-05	0.00202684	0	7.05725	53.4502	65.4143	132.472	149.93	heavy metal-associated domain containing protein, expressed
LOC_Os03g03630.1	15.473	2.76e-06	0.000143043	27.6461	4.22e-08	4.4e-06	40.2141	21.1718	777.318	919.764	350.106	599.72	expressed protein
LOC_Os03g03670.1	5.39544	0.00166661	0.0270532	5.36828	0.00170811	0.0274999	240.102	187.017	1222.48	1070.42	1174.19	1130.31	expressed protein
LOC_Os03g03680.1	14.3317	0.000180768	0.00456544	14.0231	0.000214009	0.00523264	7.09661	4.70484	83.2296	82.2634	115.268	53.8671	transporter family protein, putative, expressed
LOC_Os03g03760.1	118.939	9.57e-07	5.87e-05	83.8485	7.31e-06	0.000323922	1.18277	0	39.7059	59.4675	67.9567	72.7205	MYB family transcription factor, putative, expressed
LOC_Os03g03910.1	5.36326	0.00170616	0.0274811	15.4698	1.28e-06	7.76e-05	211.716	191.722	3572	2669.1	553.116	1610.63	catalase domain containing protein, expressed
LOC_Os03g04060.1	39.4568	1.07e-06	6.36e-05	9.80556	0.00201038	0.0311976	7.09661	0	35.888	33.6983	125.591	154.419	CHIT16 - Chitinase family protein precursor, expressed
LOC_Os03g04190.1	46.6992	7.35e-06	0.000326851	80.8897	3.08e-07	2.38e-05	0	2.35242	93.156	97.1303	54.1933	55.6626	cytochrome P450, putative, expressed
LOC_Os03g04530.1	238.35	5.29e-14	4.55e-11	62.723	2.38e-09	3.8e-07	4.73108	2.35242	178.676	265.622	810.319	878.033	cytochrome P450, putative, expressed
LOC_Os03g04550.1	5.74401	0.00120856	0.0209867	13.7089	3.98e-06	0.000200605	117.094	92.9205	1443.92	1435.15	561.718	644.609	expressed protein
LOC_Os03g04950.1	6.98387	0.000907905	0.0166925	8.03432	0.000474074	0.00992699	17.7415	23.5242	131.335	200.207	164.3	123.894	OsSub26 - Putative Subtilisin homologue, expressed
LOC_Os03g05070.1	6599	0.000156092	0.0040199	2645	0.000596984	0.0119273	0	0	18.3258	22.7959	27.5268	31.4225	exostosin family domain containing protein, expressed
LOC_Os03g05390.12	12.4252	0.000921963	0.0168722	15.3698	0.00028303	0.00656637	1.18277	3.52863	39.7059	32.7071	16.344	42.1959	Citrate transporter protein, putative, expressed
LOC_Os03g05530.1	84.0893	1.18e-08	1.4e-06	120.548	1.14e-09	2.1e-07	3.54831	0	171.041	256.702	136.774	161.601	nodulin, putative, expressed
LOC_Os03g06460.1	9.47924	0.00214091	0.0329722	11.3373	0.000937237	0.0171902	5.91384	3.52863	56.5045	50.5474	47.3116	42.1959	type I inositol-1,4,5-trisphosphate 5-phosphatase, putative, expressed
LOC_Os03g06610.1	15.3953	5.01e-05	0.00160741	17.5423	2.49e-05	0.000894075	4.73108	8.23346	101.555	125.873	75.6986	123.894	expressed protein
LOC_Os03g06850.1	11.0919	5.87e-05	0.00183665	21.6119	7.94e-07	5.29e-05	23.6554	11.7621	338.263	427.175	234.838	158.01	B3 DNA binding domain containing protein, expressed
LOC_Os03g06850.2	12.4669	0.000723773	0.0138976	31.9026	5.49e-06	0.000257833	4.73108	2.35242	103.082	122.9	54.1933	34.1158	B3 DNA binding domain containing protein, expressed
LOC_Os03g07100.1	5.5106	0.00129461	0.0221159	5.05685	0.00225204	0.0341369	781.81	551.642	3224.57	3518.5	3376.33	3971.8	LTPL82 - Protease inhibitor/seed storage/LTP family protein precursor, expressed
LOC_Os03g07200.1	25.7823	9.32e-05	0.00268464	73.0334	1.41e-07	1.23e-05	1.18277	1.17621	87.0474	85.2368	25.8063	35.0136	expressed protein
LOC_Os03g07260.1	30.29	3.45e-06	0.000173292	21.335	2.71e-05	0.000952422	2.36554	3.52863	70.2488	55.503	64.5158	114.019	tetratricopeptide repeat domain containing protein, expressed
LOC_Os03g07540.1	192.56	4.49e-08	4.4e-06	50.3724	8.74e-05	0.0024969	1.18277	0	22.9072	36.6716	109.247	118.508	bHLH family protein, putative, expressed
LOC_Os03g07810.1	6.73472	0.000533991	0.0108897	14.3517	3.56e-06	0.000181937	83.9766	41.1673	864.366	931.658	313.117	529.693	expressed protein
LOC_Os03g07940.1	6599	5.91e-05	0.00184129	2645	0.000142975	0.00376648	0	0	25.9615	25.7693	36.1289	27.8313	AP2 domain containing protein, expressed
LOC_Os03g08600.1	26.9861	7.71e-08	7.05e-06	15.1244	4.61e-06	0.000224422	20.1071	16.4669	322.228	230.932	444.729	542.262	glycosyl transferase, putative, expressed
LOC_Os03g08610.1	19.7726	0.000114842	0.00317793	38.2841	3.5e-06	0.000179719	2.36554	2.35242	55.7409	124.882	43.0106	50.2759	leucine-rich repeat family protein, putative, expressed
LOC_Os03g08620.1	17.1274	2.02e-06	0.000109745	38.4929	5.46e-09	7.89e-07	18.9243	17.6431	671.182	736.406	254.622	371.683	B3 DNA binding domain containing protein, expressed
LOC_Os03g08754.1	619.273	2.64e-13	1.69e-10	600.223	4.02e-13	3.45e-10	1.18277	0	281.759	428.166	311.396	421.061	OsMADS47 - MADS-box family gene with MIKCc type-box, expressed
LOC_Os03g08754.2	42.0764	2.19e-05	0.000825578	45.7357	1.46e-05	0.000569474	2.36554	0	52.6866	55.503	43.8708	55.6626	OsMADS47 - MADS-box family gene with MIKCc type-box, expressed
LOC_Os03g09200.1	22.7379	8.36e-06	0.000366042	18.2555	3.38e-05	0.00114211	7.09661	2.35242	76.3574	96.1392	96.3436	118.508	domain of unknown function DUF966 domain containing protein, expressed
LOC_Os03g10030.1	10.2669	2.56e-05	0.000933171	6.84304	0.000384189	0.00847967	177.415	194.074	1267.53	1274.59	1638.7	2175.33	membrane associated DUF588 domain containing protein, putative, expressed
LOC_Os03g10090.1	100.976	1.85e-10	4.28e-08	42.326	1.26e-07	1.12e-05	2.36554	2.35242	111.482	88.2102	130.752	345.647	transporter family protein, putative, expressed
LOC_Os03g10210.1	13.6913	1.68e-05	0.000660537	11.6628	4.83e-05	0.00153395	23.6554	15.2907	235.181	219.039	309.676	223.548	homeobox domain containing protein, expressed
LOC_Os03g10880.1	7.98581	0.000138527	0.00365098	6.52783	0.000486593	0.0101501	275.585	174.079	1640.92	1294.41	1854.61	1736.32	BTBN5 - Bric-a-Brac, Tramtrack, Broad Complex BTB domain with non-phototropic hypocotyl 3 NPH3 and coiled-coil domains, expressed
LOC_Os03g11400.1	9.94824	8.18e-05	0.00242048	25.7221	1.16e-07	1.04e-05	24.8381	14.1145	492.505	509.439	172.042	215.468	targeting protein-related, putative, expressed
LOC_Os03g11600.1	6599	3.1e-10	6.62e-08	2645	1.22e-09	2.23e-07	0	0	91.6289	129.837	103.225	162.499	YABBY domain containing protein, putative, expressed
LOC_Os03g11600.2	6599	0.000824601	0.0154612	2645	0.00252086	0.0372777	0	0	12.2172	16.8491	18.0644	22.4446	YABBY domain containing protein, putative, expressed
LOC_Os03g11680.1	31.1333	1.42e-07	1.18e-05	13.0238	5.32e-05	0.00165814	9.46215	7.05725	96.2103	118.935	270.106	244.197	ZOS3-05 - C2H2 zinc finger protein, expressed
LOC_Os03g11734.1	33.5062	3.62e-05	0.00123479	49.8978	3.73e-06	0.000189682	2.36554	0	59.5588	58.4764	35.2687	43.9914	MATE efflux protein, putative, expressed
LOC_Os03g11770.1	9.83933	7.54e-05	0.0022566	8.69519	0.000176677	0.00448434	37.8486	34.1101	291.685	334.009	336.343	371.683	expressed protein
LOC_Os03g12140.1	8.05511	0.000130551	0.00348288	5.82982	0.00107281	0.0190788	221.178	247.004	1247.68	1481.73	1569.89	2201.37	glucan endo-1,3-beta-glucosidase precursor, putative, expressed
LOC_Os03g12500.1	120.13	4.87e-09	6.69e-07	20.4138	0.000295959	0.00685173	1.18277	1.17621	31.3065	16.8491	89.4619	193.921	cytochrome P450, putative, expressed
LOC_Os03g12860.1	34.6057	6.79e-06	0.000307269	18.1758	0.000238873	0.00570814	2.36554	2.35242	38.1787	47.574	85.1609	78.1073	homeobox associated leucine zipper, putative, expressed
LOC_Os03g13200.1	8.72946	7.97e-05	0.00236877	5.52838	0.00141604	0.0237699	146.663	165.845	884.219	843.448	953.114	1774.92	peroxidase precursor, putative, expressed
LOC_Os03g13210.1	6599	9.71e-16	1.44e-12	2645	1.02e-11	4.42e-09	0	0	148.133	218.048	817.2	383.354	peroxidase precursor, putative, expressed
LOC_Os03g13390.2	73.9061	1.09e-11	3.99e-09	23.8937	6.59e-08	6.46e-06	47.3108	38.8149	1329.38	728.477	3310.95	3054.26	oxidoreductase, aldo/keto reductase family protein, putative, expressed
LOC_Os03g14080.1	12.5871	2.18e-05	0.000821333	14.4052	9.9e-06	0.000419557	14.1932	25.8766	248.162	329.054	209.891	294.473	transmembrane amino acid transporter protein, putative, expressed
LOC_Os03g14140.1	13.4996	0.000375065	0.00827093	9.40452	0.00250205	0.0370834	0	7.05725	26.7251	39.645	38.7095	56.5604	POEI16 - Pollen Ole e I allergen and extensin family protein precursor, expressed
LOC_Os03g14210.1	15.1171	1.84e-05	0.000712036	7.52619	0.00108467	0.0192043	10.6449	9.40967	85.5203	65.4143	109.247	193.921	glycosyl hydrolases family 17, putative, expressed
LOC_Os03g14642.1	6599	2.94e-07	2.2e-05	2645	3.82e-07	2.8e-05	0	0	29.0158	50.5474	28.387	52.0715	LTPL107 - Protease inhibitor/seed storage/LTP family protein precursor, expressed
LOC_Os03g14654.1	664.003	1.42e-16	2.73e-13	227.553	8.44e-13	5.75e-10	1.18277	2.35242	416.911	387.53	747.523	1599.85	LTPL108 - Protease inhibitor/seed storage/LTP family protein precursor, expressed
LOC_Os03g14669.1	6.59981	0.000755591	0.0143817	15.3201	2.93e-06	0.000154632	53.2246	30.5814	716.996	566.924	224.515	328.589	core histone H2A/H2B/H3/H4, putative, expressed
LOC_Os03g14669.2	11.1978	0.00032993	0.00750865	31.4206	6.94e-07	4.71e-05	7.09661	4.70484	182.494	188.314	57.6341	74.5161	core histone H2A/H2B/H3/H4, putative, expressed
LOC_Os03g15020.1	4.86762	0.00294812	0.0424812	5.80902	0.00103664	0.0185652	196.34	164.669	1071.29	1025.81	630.535	1126.72	beta-galactosidase precursor, putative, expressed
LOC_Os03g16610.1	111.657	1.91e-07	1.54e-05	144.458	3.44e-08	3.71e-06	0	1.17621	81.7024	88.2102	35.2687	96.0629	laccase precursor protein, putative, expressed
LOC_Os03g17350.1	83.6802	4.7e-11	1.29e-08	61.6222	4.73e-10	1e-07	9.46215	4.70484	479.525	393.477	339.783	845.713	white-brown complex homolog protein, putative, expressed
LOC_Os03g17470.1	14.9498	6.98e-05	0.00211127	16.9966	3.21e-05	0.0010958	2.36554	5.88104	71.776	68.3877	55.0535	68.2316	IN2-1 protein, putative, expressed
LOC_Os03g17860.2	56.4886	8.77e-07	5.53e-05	31.0814	2.54e-05	0.000907279	1.18277	2.35242	60.3224	49.5563	114.408	85.2895	OsPDIL5-1 protein disulfide isomerase PDIL5-1, expressed
LOC_Os03g17870.1	85.3034	4.07e-11	1.15e-08	30.7417	9.8e-08	9.1e-06	7.09661	9.40967	232.89	274.542	691.61	716.432	metallothionein, putative, expressed
LOC_Os03g18250.1	100.125	5.26e-06	0.000244059	98.7354	4.57e-06	0.000223179	1.18277	0	87.0474	29.7338	43.0106	75.4139	expressed protein
LOC_Os03g18300.1	9.65527	0.000134597	0.00357042	6.7774	0.00114109	0.0200186	21.2898	16.4669	119.118	136.775	122.15	242.402	chloroplast unusual positioning protein, putative, expressed
LOC_Os03g18400.1	9.31042	7.28e-05	0.00219224	5.08903	0.0032608	0.0456568	72.1489	74.1012	306.193	438.077	726.018	635.631	expressed protein
LOC_Os03g18630.1	18.1172	8.73e-07	5.52e-05	28.5215	3.21e-08	3.5e-06	31.9348	23.5242	755.175	826.599	449.03	555.729	receptor-like kinase RHG1, putative, expressed
LOC_Os03g18640.1	6599	0.000130132	0.00347739	2645	6.94e-05	0.00205549	0	0	23.6708	22.7959	15.4838	25.138	laccase precursor protein, putative, expressed
LOC_Os03g18850.1	29.5719	3.97e-08	3.98e-06	15.2344	5.27e-06	0.000249721	31.9348	9.40967	271.069	358.787	578.922	643.712	pathogenesis-related Bet v I family protein, putative, expressed
LOC_Os03g19080.1	6.03335	0.000861799	0.0159934	9.10112	6.52e-05	0.00195006	140.75	151.731	1271.35	1390.55	749.244	1015.39	expressed protein
LOC_Os03g19250.1	11.0725	1.2e-05	0.000491151	6.5579	0.000436679	0.00933544	2053.29	1872.52	12938.8	12806.3	29752.1	13716.4	AMP-binding enzyme, putative, expressed
LOC_Os03g19420.2	1362.9	2.84e-21	4.65e-17	481.527	1.04e-17	8.48e-14	9.46215	4.70484	5484.75	1337.03	5746.21	13561.9	nicotianamine synthase, putative, expressed
LOC_Os03g19427.1	6598.21	3.87e-22	1.27e-17	2644.83	4.95e-19	8.09e-15	1.18277	0	2440.38	687.841	2637.41	5166.75	nicotianamine synthase, putative, expressed
LOC_Os03g20080.1	6599	0.000459278	0.00962157	2645	1.98e-08	2.36e-06	0	0	142.025	82.2634	15.4838	15.2623	retrotransposon protein, putative, unclassified, expressed
LOC_Os03g20120.1	6.90179	0.00058915	0.0117474	5.29846	0.00256052	0.0376935	29.5692	39.9911	209.983	158.58	190.107	289.984	glycosyl transferase 8 domain containing protein, putative, expressed
LOC_Os03g21400.1	6599	6.99e-07	4.54e-05	2645	5.33e-07	3.73e-05	0	0	54.2138	36.6716	38.7095	49.3781	cytochrome P450, putative, expressed
LOC_Os03g21419.1	6599	5.22e-06	0.000242567	2645	0.000175318	0.00445676	0	0	18.3258	18.8314	42.1503	33.218	retrotransposon protein, putative, Ty1-copia subclass, expressed
LOC_Os03g21480.1	6599	4.01e-05	0.00134187	2645	0.000294501	0.00682281	0	0	25.9615	11.8935	17.2042	45.787	HAD superfamily phosphatase, putative, expressed
LOC_Os03g21970.1	15.8098	1.69e-06	9.48e-05	11.5767	1.7e-05	0.000649626	53.2246	57.6342	565.808	717.575	818.061	934.594	basic helix-loop-helix domain containing protein, expressed
LOC_Os03g22010.1	7.20476	0.000481308	0.0100189	14.6222	3.93e-06	0.000198725	29.5692	14.1145	354.298	284.453	91.1824	223.548	peroxidase precursor, putative, expressed
LOC_Os03g22020.1	82.1069	2.09e-09	3.29e-07	130.84	6.58e-11	2.03e-08	4.73108	0	310.775	308.24	129.892	258.562	peroxidase precursor, putative, expressed
LOC_Os03g22040.1	7.61888	0.000244314	0.00587091	13.8986	4.2e-06	0.00020792	73.3317	57.6342	946.068	874.173	381.934	615.88	expressed protein
LOC_Os03g22960.1	13.7057	1.32e-05	0.000534397	11.3388	4.66e-05	0.00148661	23.6554	18.8193	249.689	231.923	340.644	241.504	expressed protein
LOC_Os03g25120.1	21.4882	0.000117118	0.00322184	12.6991	0.00136985	0.0231296	2.36554	3.52863	38.1787	36.6716	39.5697	87.0851	HSF-type DNA-binding domain containing protein, expressed
LOC_Os03g25850.1	20.6793	1.12e-06	6.61e-05	9.31794	0.000182792	0.00460376	7.09661	30.5814	195.475	155.607	249.461	529.693	expressed protein
LOC_Os03g25869.1	16.7766	0.000139007	0.00366066	9.68562	0.00172866	0.0277214	8.27938	1.17621	61.8495	29.7338	67.9567	90.6762	amino acid permease family protein, putative, expressed
LOC_Os03g27190.1	8.11431	0.00130365	0.0222363	9.08027	0.000708224	0.0137136	9.46215	2.35242	55.7409	51.5385	45.5912	50.2759	ICE-like protease p20 domain containing protein, putative, expressed
LOC_Os03g28980.1	5.73908	0.00140404	0.0235069	6.73287	0.000556787	0.011248	92.256	70.5725	574.971	521.332	557.417	377.07	WD40-like Beta Propeller Repeat family protein, expressed
LOC_Os03g28990.1	6.0487	0.000876849	0.0162083	5.39231	0.00185074	0.0291636	138.384	114.092	649.802	711.628	862.792	664.361	zinc finger family protein, putative, expressed
LOC_Os03g30250.1	439.848	4.46e-15	5.83e-12	489.774	1.79e-15	4.17e-12	1.18277	2.35242	961.34	770.105	678.707	876.238	COBRA-like protein precursor, putative, expressed
LOC_Os03g30260.1	43.5639	4.02e-09	5.71e-07	45.6195	3.22e-09	4.97e-07	10.6449	9.40967	395.531	519.35	387.955	485.701	COBRA-like protein precursor, putative, expressed
LOC_Os03g30950.1	78.2604	5.85e-06	0.000269432	88.8863	2.63e-06	0.000140943	0	1.17621	64.9038	39.645	50.7525	41.2981	acyl-desaturase, chloroplast precursor, putative, expressed
LOC_Os03g31730.1	10.1191	2.66e-05	0.00096066	8.8451	6.47e-05	0.00194075	227.092	296.405	2631.28	1999.1	3074.39	2222.91	expressed protein
LOC_Os03g32490.1	5.63138	0.00116001	0.0203273	4.90213	0.00239665	0.0358466	462.463	539.88	3034.44	1879.17	3058.05	2586.52	DUF1230 domain containing protein, expressed
LOC_Os03g36560.1	13.0161	3.08e-05	0.00108001	18.6526	3.33e-06	0.000172291	14.1932	11.7621	204.638	279.497	158.279	179.557	peroxidase precursor, putative, expressed
LOC_Os03g37140.1	19.0725	0.000552761	0.0111511	18.0954	0.000769856	0.0146893	0	4.70484	33.5973	51.5385	42.1503	47.5826	expressed protein
LOC_Os03g37290.1	45.8541	0.000263798	0.00627452	90.5095	1.16e-05	0.000471647	1.18277	0	56.5045	50.5474	32.688	21.5468	cytochrome P450, putative, expressed
LOC_Os03g37830.1	59.3094	5.91e-05	0.00184129	39.3808	0.000371711	0.00825276	0	1.17621	27.4887	18.8314	26.6665	43.0937	potassium transporter, putative, expressed
LOC_Os03g37840.1	15.0636	6.75e-05	0.00205921	17.3028	3.13e-05	0.00107696	4.73108	4.70484	74.0667	89.2013	55.0535	87.0851	potassium transporter, putative, expressed
LOC_Os03g39020.1	5.95537	0.000851207	0.0158419	11.2176	1.29e-05	0.000512335	292.144	269.352	3255.88	3042.76	1343.65	2000.26	Kinesin motor domain domain containing protein, expressed
LOC_Os03g40770.1	16.2888	4.5e-05	0.0014701	14.155	0.000129339	0.0034631	1.18277	10.5859	49.6323	116.953	92.0426	99.6541	expressed protein
LOC_Os03g41330.1	6599	0.000158623	0.00407459	2645	1.13e-05	0.000465369	0	0	43.5237	45.5918	25.8063	21.5468	DUF260 domain containing protein, putative, expressed
LOC_Os03g42420.1	39.4959	9.17e-06	0.000392935	42.6596	6.5e-06	0.000295215	0	3.52863	70.2488	80.2812	77.419	61.9471	B3 DNA binding domain containing protein, expressed
LOC_Os03g43650.1	71.505	1.85e-08	2.07e-06	75.9692	1.24e-08	1.59e-06	1.18277	2.35242	129.808	138.758	91.1824	161.601	uncharacterized protein At4g06744 precursor, putative, expressed
LOC_Os03g44290.1	10.5299	2.4e-05	0.000885513	6.8285	0.000460203	0.0097238	128.922	131.735	788.772	991.125	1517.41	1227.27	expansin precursor, putative, expressed
LOC_Os03g44810.1	7.99388	0.000614089	0.0121336	8.70664	0.000400942	0.00876064	18.9243	17.6431	148.897	169.482	131.612	160.703	expressed protein
LOC_Os03g44890.1	28.739	2.2e-08	2.39e-06	22.8468	1.34e-07	1.18e-05	35.4831	36.4625	783.427	860.297	944.512	1123.13	anthranilate phosphoribosyltransferase, putative, expressed
LOC_Os03g46150.1	166.618	2.57e-10	5.63e-08	146.286	6.2e-10	1.25e-07	2.36554	0	192.421	153.624	123.01	271.131	LTPL72 - Protease inhibitor/seed storage/LTP family protein precursor, expressed
LOC_Os03g46150.2	6599	8.23e-07	5.25e-05	2645	1.53e-06	9.07e-05	0	0	51.1595	38.6539	32.688	69.1294	LTPL72 - Protease inhibitor/seed storage/LTP family protein precursor, expressed
LOC_Os03g46920.1	15.017	2.18e-06	0.000116437	27.4486	2.47e-08	2.8e-06	67.4178	51.7532	1631.76	1639.32	732.9	1056.69	expressed protein
LOC_Os03g47730.1	10.1801	0.000155251	0.00400646	9.38494	0.000255515	0.00601777	15.376	11.7621	129.808	124.882	129.032	147.237	homeobox domain containing protein, expressed
LOC_Os03g47940.1	13.65	2.87e-06	0.00014708	10.1164	2.57e-05	0.000912646	664.716	559.875	6048.27	6340.23	8533.29	8182.41	GDSL-like lipase/acylhydrolase, putative, expressed
LOC_Os03g48235.1	6599	3.13e-07	2.32e-05	2645	8.84e-08	8.34e-06	0	0	104.61	53.5208	48.1718	80.8006	expressed protein
LOC_Os03g48810.1	33.6411	8.58e-09	1.07e-06	27.4504	3.86e-08	4.08e-06	35.4831	19.9956	852.912	670.001	866.233	1000.13	nucleobase-ascorbate transporter, putative, expressed
LOC_Os03g49050.1	6599	0.000482368	0.0100282	2645	0.00182275	0.0288687	0	0	9.16289	20.8136	19.7849	22.4446	possible lysine decarboxylase domain containing protein, expressed
LOC_Os03g49630.1	25.6367	1.41e-07	1.17e-05	34.7071	1.46e-08	1.81e-06	15.376	19.9956	659.728	567.915	327.74	579.071	expressed protein
LOC_Os03g49880.1	454.74	5.48e-14	4.59e-11	556.542	1.2e-14	2.3e-11	2.36554	0	647.511	669.01	530.75	544.955	TCP family transcription factor, putative, expressed
LOC_Os03g50140.1	918.912	1.28e-14	1.31e-11	581.15	5.26e-13	4.02e-10	0	1.17621	287.104	396.45	516.127	564.706	plastocyanin-like domain containing protein, putative, expressed
LOC_Os03g50420.1	16.1077	1.7e-05	0.00066538	20.8396	3.5e-06	0.000179728	8.27938	5.88104	130.571	164.527	101.505	126.588	expressed protein
LOC_Os03g51110.1	174.015	2.65e-10	5.76e-08	84.7335	4.28e-08	4.45e-06	2.36554	0	102.319	98.1214	174.623	237.015	MYB family transcription factor, putative, expressed
LOC_Os03g51230.1	4.96707	0.00254813	0.0379906	4.83621	0.00313025	0.0441697	294.509	271.704	1294.26	1444.07	1343.65	1468.78	SNF2 family N-terminal domain containing protein, expressed
LOC_Os03g51690.1	6599	7.18e-13	3.67e-10	2645	6.13e-14	8.71e-11	0	0	333.682	407.353	230.537	296.269	Homeobox domain containing protein, expressed
LOC_Os03g51980.1	15.0819	0.00120742	0.020978	30.7626	3.43e-05	0.00115609	2.36554	1.17621	53.4502	55.503	10.3225	43.0937	expressed protein
LOC_Os03g52010.1	18.6534	6.18e-07	4.08e-05	12.057	1.3e-05	0.000513093	60.3212	32.9339	633.766	490.607	830.964	908.558	lecithin cholesterol acyltransferase, putative, expressed
LOC_Os03g52070.1	14.5566	2.57e-06	0.000134579	17.4159	7.15e-07	4.82e-05	81.6111	54.1056	1161.4	1202.24	750.104	1225.48	OsSCP20 - Putative Serine Carboxypeptidase homologue, expressed
LOC_Os03g52320.1	307.823	1.69e-13	1.18e-10	178.127	1.4e-11	5.69e-09	3.54831	0	260.379	371.672	480.858	611.391	GRF-interacting factor 1, putative, expressed
LOC_Os03g52650.1	8.1903	0.000133435	0.00355113	13.2294	4.98e-06	0.00023843	127.739	65.8677	1346.18	1215.12	652.9	932.798	syntaxin-related protein, putative, expressed
LOC_Os03g52910.1	27.2831	1.67e-07	1.36e-05	35.1502	2.45e-08	2.79e-06	15.376	8.23346	497.85	332.027	298.493	345.647	uncharacterized UPF0114 domain containing protein, expressed
LOC_Os03g53580.1	10.1958	0.000146436	0.00381486	15.2247	1.2e-05	0.000484641	14.1932	11.7621	203.874	191.287	128.171	136.463	expressed protein
LOC_Os03g53690.1	17.6202	1.34e-06	7.67e-05	7.50578	0.000451946	0.00959276	24.8381	10.5859	122.172	143.713	221.074	403.105	oxidoreductase, short chain dehydrogenase/reductase family domain containing protein, expressed
LOC_Os03g53860.2	6.32005	0.00139611	0.0234101	8.52075	0.000254577	0.00600001	26.0209	29.4052	224.491	247.781	140.214	210.082	periplasmic beta-glucosidase precursor, putative, expressed
LOC_Os03g53860.3	6.39247	0.000943027	0.0171981	5.27278	0.00280499	0.0405613	46.128	35.2863	229.072	200.207	273.547	246.891	periplasmic beta-glucosidase precursor, putative, expressed
LOC_Os03g54130.1	6599	0.0013277	0.0224822	2645	0.00263256	0.0385111	0	0	14.5079	2.97338	6.02148	16.1601	cysteine protease 1 precursor, putative, expressed
LOC_Os03g55100.1	40.6328	7.8e-09	9.92e-07	19.1566	1.84e-06	0.000106538	10.6449	9.40967	200.82	183.358	274.407	540.466	cyclic nucleotide-gated ion channel 2, putative, expressed
LOC_Os03g55220.1	13.2153	0.000211345	0.00520103	9.32839	0.00138562	0.0233553	1.18277	10.5859	47.3416	62.4409	77.419	78.1073	bHelix-loop-helix transcription factor, putative, expressed
LOC_Os03g55250.1	35.5704	1.86e-06	0.000102197	9.65664	0.00195093	0.0303905	7.09661	0	42.7601	25.7693	181.505	70.925	cytochrome P450 81E1, putative, expressed
LOC_Os03g55530.1	23.6873	1.82e-05	0.000705601	13.1206	0.000460815	0.00973043	0	8.23346	46.578	61.4498	77.419	117.61	HLS, putative, expressed
LOC_Os03g55610.1	61.2405	3.22e-07	2.37e-05	50.7424	1.02e-06	6.5e-05	1.18277	2.35242	93.156	86.2279	99.7845	116.712	dof zinc finger domain containing protein, putative, expressed
LOC_Os03g55760.1	9.77762	0.000243449	0.00585442	10.0588	0.000213885	0.00523264	11.8277	12.9383	125.226	123.891	129.032	113.121	MYB family transcription factor, putative, expressed
LOC_Os03g56050.1	19.9495	1.22e-05	0.000500469	10.0111	0.000687919	0.0134159	2.36554	11.7621	54.2138	87.219	145.376	136.463	AP2-like ethylene-responsive transcription factor AINTEGUMENTA, putative, expressed
LOC_Os03g56070.1	14.3328	4.82e-06	0.000227427	25.7489	7.05e-08	6.82e-06	29.5692	28.229	713.178	775.06	293.332	535.08	expressed protein
LOC_Os03g56370.1	6599	3.05e-13	1.81e-10	2645	5.73e-09	8.06e-07	0	0	87.0474	77.3078	285.59	374.376	methyltransferase, putative, expressed
LOC_Os03g56500.1	6599	4.28e-09	6e-07	2645	9.71e-07	6.23e-05	0	0	58.0316	33.6983	169.462	64.6405	expressed protein
LOC_Os03g56580.1	13.1377	0.00237238	0.0358611	17.8399	0.000561944	0.0113242	2.36554	1.17621	37.4151	25.7693	24.0859	22.4446	no apical meristem protein, putative, expressed
LOC_Os03g56700.1	11.6396	4.59e-05	0.0014957	13.7243	1.73e-05	0.000656923	18.9243	15.2907	206.929	262.648	152.257	245.993	expressed protein
LOC_Os03g57200.1	10.4371	0.000360206	0.00800263	11.0517	0.000309171	0.00709725	9.46215	9.40967	81.7024	126.864	115.268	81.6984	glutathione S-transferase, putative, expressed
LOC_Os03g57220.1	6.69285	0.000384071	0.00840712	7.0318	0.000267937	0.00626069	727.403	541.056	5093.8	3825.74	4415.46	4074.15	hydroxyacid oxidase 1, putative, expressed
LOC_Os03g57950.1	18.0738	4.86e-06	0.000228716	17.7774	5.95e-06	0.000274963	8.27938	11.7621	158.06	198.225	154.838	207.388	type I inositol-1,4,5-trisphosphate 5-phosphatase, putative, expressed
LOC_Os03g57970.1	8.44485	0.000137269	0.00362659	4.85108	0.00343343	0.0474234	37.8486	77.6298	335.209	224.985	303.654	671.543	LTPL73 - Protease inhibitor/seed storage/LTP family protein precursor, expressed
LOC_Os03g57980.1	19.7124	3.67e-05	0.00124801	18.197	5.17e-05	0.00161779	2.36554	4.70484	77.121	51.5385	36.1289	103.245	LTPL99 - Protease inhibitor/seed storage/LTP family protein precursor, expressed
LOC_Os03g57990.1	26.7205	2.56e-05	0.000933171	17.8338	0.000191524	0.00478678	3.54831	1.17621	56.5045	27.7515	49.032	77.2095	LTPL74 - Protease inhibitor/seed storage/LTP family protein precursor, expressed
LOC_Os03g58850.1	40.7111	8.96e-08	8.04e-06	14.7028	6.4e-05	0.00192335	1.18277	10.5859	77.8846	95.148	212.472	266.642	uncharacterized PE-PGRS family protein PE_PGRS3 precursor, putative, expressed
LOC_Os03g58900.1	6.95146	0.000435172	0.00927108	6.50648	0.000702752	0.0136238	61.504	90.5681	451.272	538.181	483.439	573.684	galactosyltransferase family protein, putative, expressed
LOC_Os03g59320.1	5.9499	0.000918147	0.0168289	6.76378	0.000416116	0.00898403	250.747	155.26	1467.59	1278.55	1238.7	1177	expressed protein
LOC_Os03g60480.1	22.0747	1e-07	8.85e-06	22.5067	9.74e-08	9.07e-06	79.2455	130.559	2180.77	2541.25	2678.7	1952.68	heavy metal-associated domain containing protein, expressed
LOC_Os03g60720.1	9.77326	4.15e-05	0.00137718	6.7037	0.000496859	0.0102985	120.642	94.0967	680.344	759.202	685.588	1413.11	expansin precursor, putative, expressed
LOC_Os03g62200.1	5.69029	0.00123884	0.0214101	4.99796	0.00251972	0.0372776	249.564	116.445	1035.41	793.892	1031.39	1051.31	ammonium transporter protein, putative, expressed
LOC_Os04g01610.1	17.0706	2.56e-06	0.000134116	8.37701	0.000301682	0.00696941	17.7415	22.348	143.552	192.278	302.794	381.558	expressed protein
LOC_Os04g04330.1	44.8315	1.35e-08	1.56e-06	32.9254	1.38e-07	1.21e-05	10.6449	3.52863	200.056	266.613	313.117	322.305	receptor-like protein kinase 2 precursor, putative, expressed
LOC_Os04g05070.1	16.3974	0.000296477	0.00689129	18.9313	0.000159212	0.00411477	7.09661	0	58.0316	76.3167	49.032	67.3338	expressed protein
LOC_Os04g09590.1	7.88884	0.000419201	0.00898944	5.90241	0.00213813	0.0327753	27.2037	23.5242	162.641	136.775	210.752	189.433	transferase family protein, putative, expressed
LOC_Os04g10750.1	73.89	1.17e-06	6.81e-05	26.7282	0.000229739	0.00552627	0	2.35242	35.1244	27.7515	69.6771	104.143	inorganic phosphate transporter, putative, expressed
LOC_Os04g11970.1	11.3809	1.97e-05	0.000755785	9.85869	5.07e-05	0.00159565	42.5797	22.348	339.79	300.311	265.805	473.132	O-methyltransferase, putative, expressed
LOC_Os04g14810.1	6599	0.000594213	0.0118267	2645	0.0018255	0.0288913	0	0	10.69	15.858	8.60211	26.9335	3-5 exonuclease domain-containing protein, putative, expressed
LOC_Os04g15690.1	7.16473	0.000352181	0.00789311	6.16315	0.000857106	0.0160354	86.3421	44.6959	442.873	364.734	416.342	522.511	DSBA-like thioredoxin domain containing protein, expressed
LOC_Os04g15800.1	18.2601	8.64e-07	5.47e-05	26.1208	6.19e-08	6.14e-06	22.4726	32.9339	737.613	709.646	392.256	619.471	expressed protein
LOC_Os04g16970.1	21.4463	4.6e-05	0.00149681	26.4438	1.23e-05	0.000492292	2.36554	2.35242	70.2488	54.5119	26.6665	74.5161	zinc finger, C3HC4 type domain containing protein, expressed
LOC_Os04g19140.1	52.5042	1.08e-08	1.3e-06	36.5049	1.56e-07	1.33e-05	4.73108	4.70484	151.188	193.269	209.031	286.393	expressed protein
LOC_Os04g19740.1	10.2315	0.0010258	0.0183795	20.6008	1.95e-05	0.000725588	2.36554	4.70484	73.3031	72.3522	29.2472	43.0937	transketolase, chloroplast precursor, putative, expressed
LOC_Os04g22380.1	33.8694	2.6e-05	0.000944268	25.6155	0.000106785	0.00295489	2.36554	1.17621	48.1052	42.6184	49.032	70.925	short chain dehydrogenase/reductase protein, putative, expressed
LOC_Os04g23220.1	15.7954	8.79e-06	0.000381612	7.51173	0.000785784	0.0149536	22.4726	7.05725	123.699	98.1214	194.408	272.029	expressed protein
LOC_Os04g26360.1	17.8279	0.00133652	0.0225613	22.9882	0.000455068	0.00964649	1.18277	2.35242	46.578	34.6894	36.9891	26.0358	transposon protein, putative, CACTA, En/Spm sub-class
LOC_Os04g27190.1	42.1088	1.02e-06	6.11e-05	14.5202	0.000364392	0.00812507	0	5.88104	52.6866	32.7071	167.741	79.9028	terpene synthase, putative, expressed
LOC_Os04g28520.1	363.169	2.02e-13	1.35e-10	298.805	1.06e-12	7.04e-10	2.36554	0	305.43	401.406	269.246	589.844	male sterility protein, putative, expressed
LOC_Os04g28620.1	6599	7.03e-12	2.77e-09	2645	3.04e-09	4.75e-07	0	0	71.0124	90.1924	64.5158	296.269	male sterility protein, putative, expressed
LOC_Os04g29090.1	6599	2.25e-05	0.000841	2645	0.000343228	0.00771636	0	0	16.7986	11.8935	36.9891	12.569	FAD-binding and arabino-lactone oxidase domains containing protein, putative, expressed
LOC_Os04g29550.1	6599	3.18e-08	3.28e-06	2645	1.78e-06	0.000103517	0	0	41.233	46.5829	61.075	116.712	RIPER2 - Ripening-related family protein precursor, expressed
LOC_Os04g29580.1	16.9814	0.000720543	0.01386	23.033	0.00016693	0.00427346	0	4.70484	68.7217	39.645	41.2901	38.6047	OsWAK37 - OsWAK short gene, expressed
LOC_Os04g30010.1	35.1426	8.27e-06	0.000362576	18.678	0.00021475	0.00524292	4.73108	0	52.6866	35.6805	78.2792	87.9829	OsWAK45 - OsWAK receptor-like protein kinase, expressed
LOC_Os04g30160.1	42.391	1.07e-08	1.3e-06	45.4462	6.08e-09	8.42e-07	11.8277	4.70484	442.109	309.231	398.278	302.553	OsWAK46 - OsWAK receptor-like protein kinase, expressed
LOC_Os04g30240.1	135.857	1.08e-08	1.3e-06	42.9675	1.04e-05	0.00043629	2.36554	0	58.0316	43.6095	165.161	156.215	OsWAK60 - OsWAK receptor-like protein kinase, expressed
LOC_Os04g30770.1	11.8705	0.000134318	0.00356592	8.37495	0.000987166	0.0178554	2.36554	14.1145	65.6674	72.3522	84.3007	111.325	glycosyl hydrolase, putative, expressed
LOC_Os04g31290.1	93.3555	1.52e-09	2.52e-07	31.1505	2.08e-06	0.000118013	2.36554	3.52863	112.245	71.361	269.246	281.007	helix-loop-helix DNA-binding domain containing protein, expressed
LOC_Os04g31484.1	43.35	3.39e-06	0.000170458	17.6527	0.000476078	0.00996256	1.18277	2.35242	26.7251	35.6805	47.3116	105.939	RALFL20 - Rapid ALkalinization Factor RALF family protein precursor, expressed
LOC_Os04g32860.1	26.7223	0.00211592	0.0326643	23.7368	0.00364122	0.04956	1.18277	0	12.2172	15.858	16.344	15.2623	expressed protein
LOC_Os04g33560.1	28.2662	2.88e-07	2.17e-05	42.0474	1.93e-08	2.31e-06	1.18277	14.1145	279.468	363.743	192.687	239.708	expressed protein
LOC_Os04g33680.1	15.8606	4.06e-06	0.00019992	15.9654	4.19e-06	0.000207673	21.2898	16.4669	278.705	324.098	266.665	332.18	glutaredoxin, putative, expressed
LOC_Os04g33870.1	20.3149	6.48e-05	0.00199093	13.5439	0.000508616	0.0104757	2.36554	4.70484	51.1595	44.6006	61.9352	81.6984	DUF623 domain containing protein, expressed
LOC_Os04g34600.1	47.1144	4.7e-09	6.52e-07	25.8477	4.66e-07	3.32e-05	4.73108	7.05725	128.28	176.42	151.397	404.003	abscisic stress-ripening, putative, expressed
LOC_Os04g34630.1	6599	0.00209871	0.0325033	2645	0.000333324	0.00752595	0	0	23.6708	24.7781	18.9246	8.97785	peroxidase precursor, putative, expressed
LOC_Os04g35280.1	8.13783	0.000436278	0.0092886	6.73405	0.00125641	0.0216123	16.5588	19.9956	135.153	111.006	157.419	140.054	neutral/alkaline invertase, putative, expressed
LOC_Os04g35430.1	20.4374	2.13e-06	0.000114173	24.5622	7.25e-07	4.88e-05	8.27938	10.5859	187.839	275.533	216.773	168.783	PHD-finger domain containing protein, expressed
LOC_Os04g35750.1	47.4914	1.03e-06	6.16e-05	32.5003	8.7e-06	0.000375378	4.73108	0	89.3382	64.4232	117.849	106.836	expressed protein
LOC_Os04g35890.1	164.698	6.82e-10	1.27e-07	37.5484	1.08e-05	0.000449378	2.36554	0	51.1595	37.6628	206.451	183.148	TKL_IRAK_CR4L.3 - The CR4L subfamily has homology with Crinkly4, expressed
LOC_Os04g36070.1	9.40567	0.000101018	0.00288079	5.50283	0.0025392	0.0374472	29.5692	47.0484	201.584	220.03	294.192	426.448	OsRR1 type-A response regulator, expressed
LOC_Os04g36670.1	9.98639	0.000150544	0.00390276	16.3452	7.05e-06	0.000314849	14.1932	18.8193	277.941	261.657	180.644	149.032	expressed protein
LOC_Os04g37550.1	14.8855	3.94e-06	0.000195186	9.11826	0.000100498	0.00280797	30.752	30.5814	318.41	240.843	350.966	562.013	aspartic proteinase nepenthesin-2 precursor, putative, expressed
LOC_Os04g38220.1	48.7149	2.57e-08	2.75e-06	39.6546	9.61e-08	8.97e-06	2.36554	4.70484	173.331	107.042	89.4619	254.971	transporter family protein, putative, expressed
LOC_Os04g38470.1	9.14214	0.000453498	0.00953718	8.34793	0.000942522	0.0172775	8.27938	17.6431	68.7217	147.678	144.515	92.4718	expressed protein
LOC_Os04g38740.1	22.3673	4.6e-07	3.21e-05	11.0208	5.57e-05	0.00172499	14.1932	21.1718	205.401	184.349	409.46	381.558	MYB family transcription factor, putative, expressed
LOC_Os04g38810.1	14.6184	5.4e-06	0.000249759	10.6011	4.98e-05	0.00157332	27.2037	24.7004	258.852	291.391	305.375	453.381	formin, putative, expressed
LOC_Os04g39160.1	10.7298	0.000120574	0.00327976	19.7499	2.44e-06	0.000133204	13.0105	8.23346	208.456	211.11	104.946	122.996	RNA-dependent RNA polymerase, putative, expressed
LOC_Os04g39320.1	95.5065	8.33e-12	3.24e-09	45.7588	2.39e-09	3.8e-07	14.1932	7.05725	565.045	407.353	1138.06	891.5	expressed protein
LOC_Os04g39320.2	145.944	3.85e-07	2.75e-05	70.8941	1.9e-05	0.000711229	1.18277	0	41.233	42.6184	97.2038	75.4139	expressed protein
LOC_Os04g40530.1	315.242	4.52e-10	9.17e-08	132.811	1.13e-07	1.03e-05	0	1.17621	97.7375	58.4764	164.3	206.49	methyltransferase domain containing protein, expressed
LOC_Os04g41280.1	6.10637	0.00107519	0.0191072	5.48338	0.00216343	0.03307	66.2351	72.925	332.918	430.148	338.923	510.839	ankyrin repeat domain containing protein, expressed
LOC_Os04g41640.1	6599	8.19e-05	0.00242283	2645	0.000413673	0.00894857	0	0	16.0351	15.858	27.5268	17.9557	HEV2 - Hevein family protein precursor, expressed
LOC_Os04g41680.1	6599	0.000295514	0.0068836	2645	0.00245728	0.0365193	0	0	16.0351	11.8935	26.6665	26.9335	CHIT3 - Chitinase family protein precursor, expressed
LOC_Os04g41870.1	28.269	9.82e-07	5.97e-05	13.9664	9.07e-05	0.00257783	9.46215	2.35242	64.9038	100.104	143.655	190.33	expressed protein
LOC_Os04g41900.1	8.08199	0.000117286	0.00322369	12.6047	5.93e-06	0.000274308	460.097	294.052	4263.8	5242.06	2508.38	3586.65	expressed protein
LOC_Os04g42520.1	39.5906	4.35e-09	6.05e-07	16.4183	3.19e-06	0.000165657	14.1932	22.348	255.034	344.912	670.104	776.584	phosphoribosyl transferase, putative, expressed
LOC_Os04g42520.2	6599	1.05e-05	0.00044186	2645	0.000226024	0.00545296	0	0	20.6165	20.8136	49.032	34.1158	phosphoribosyl transferase, putative, expressed
LOC_Os04g42540.1	12.3628	4.58e-05	0.00149492	22.8583	8.03e-07	5.34e-05	11.8277	10.5859	249.689	262.648	110.107	166.988	expressed protein
LOC_Os04g42720.1	6.37819	0.00186833	0.0295827	10.7482	9.78e-05	0.00274974	17.7415	14.1145	148.133	194.261	75.6986	127.485	TMS membrane protein/tumour differentially expressed protein, putative, expressed
LOC_Os04g42860.1	12.0337	6.97e-06	0.000313451	9.75419	3.29e-05	0.00111971	1289.22	916.267	10169.3	11343.4	12910.9	13629.3	GDSL-like lipase/acylhydrolase, putative, expressed
LOC_Os04g43060.1	175.711	6.55e-10	1.25e-07	52.6417	1.84e-06	0.000106393	0	2.35242	63.3766	60.4587	238.278	175.068	enzyme of the cupin superfamily protein, putative, expressed
LOC_Os04g43580.1	6599	9.04e-10	1.61e-07	2645	1.79e-08	2.16e-06	0	0	69.4852	91.1835	80.8598	170.579	DUF640 domain containing protein, putative, expressed
LOC_Os04g44120.1	11.7113	0.000126017	0.00340361	19.9014	4.53e-06	0.000221496	8.27938	8.23346	171.041	157.589	53.3331	140.054	collagen triple helix repeat, putative, expressed
LOC_Os04g44130.1	6599	1.64e-05	0.000648983	2645	1.21e-05	0.000486655	0	0	29.7794	50.5474	38.7095	34.1158	DEF12 - Defensin and Defensin-like DEFL family, expressed
LOC_Os04g44280.1	6599	0.000277978	0.00656877	2645	0.00218021	0.0332954	0	0	16.0351	7.929	25.8063	17.0579	OsRR5 type-A response regulator, expressed
LOC_Os04g44410.1	17.0886	1.24e-06	7.15e-05	5.40203	0.00252647	0.037314	34.3003	54.1056	200.056	277.515	848.168	662.565	OsSCP25 - Putative Serine Carboxypeptidase homologue, expressed
LOC_Os04g44460.1	6599	0.000850285	0.0158337	2645	0.00264772	0.0386355	0	0	10.69	10.9024	11.1827	17.9557	sulfotransferase domain containing protein, expressed
LOC_Os04g44640.1	11.6979	2.95e-05	0.0010412	9.92738	9.35e-05	0.00264659	24.8381	21.1718	200.056	256.702	215.913	322.305	ulp1 protease family, C-terminal catalytic domain containing protein, expressed
LOC_Os04g45000.1	46.7252	1.27e-07	1.07e-05	53.2978	5.38e-08	5.53e-06	4.73108	0	118.354	133.802	98.0641	122.996	short-chain dehydrogenase/reductase, putative, expressed
LOC_Os04g45000.2	6599	5.6e-05	0.00176173	2645	0.000127346	0.00341535	0	0	22.9072	15.858	14.6236	32.3202	short-chain dehydrogenase/reductase, putative, expressed
LOC_Os04g45140.1	11.2641	2.73e-05	0.000977671	7.36547	0.000396344	0.00869507	26.0209	44.6959	290.922	229.941	364.729	431.834	DTA2, putative, expressed
LOC_Os04g45210.1	8.66747	0.000118006	0.00323266	8.46321	0.000132237	0.00352913	104.084	35.2863	648.274	531.243	503.223	704.761	peroxisomal biogenesis factor 11, putative, expressed
LOC_Os04g45330.1	25.8385	4.42e-08	4.34e-06	17.957	7.29e-07	4.9e-05	50.8591	51.7532	864.366	978.241	1331.61	1319.74	YABBY domain containing protein, putative, expressed
LOC_Os04g46060.1	30.139	1.27e-06	7.29e-05	37.6479	3.46e-07	2.59e-05	3.54831	4.70484	121.408	189.305	101.505	147.237	WRKY36, expressed
LOC_Os04g46130.1	6599	6.24e-12	2.49e-09	2645	2.09e-12	1.29e-09	0	0	229.072	184.349	86.0211	276.518	plastocyanin-like domain containing protein, putative, expressed
LOC_Os04g46630.1	1063.94	3.6e-17	8.98e-14	410.852	8.14e-14	9.85e-11	0	2.35242	445.164	521.332	826.663	1676.16	expansin precursor, putative, expressed
LOC_Os04g46740.1	43.2167	2.88e-09	4.24e-07	98.4365	5.12e-12	2.67e-09	16.5588	4.70484	901.781	1191.33	461.073	457.87	pectinesterase, putative, expressed
LOC_Os04g46740.2	21.4201	4.71e-06	0.000223972	40.9212	5.78e-08	5.81e-06	7.09661	2.35242	182.494	204.172	73.1179	129.281	pectinesterase, putative, expressed
LOC_Os04g46940.1	18.5986	6.9e-07	4.49e-05	15.7402	2.15e-06	0.000120183	34.3003	32.9339	589.479	468.802	414.622	835.837	copper-transporting ATPase 3, putative, expressed
LOC_Os04g47420.1	32.6366	4.31e-07	3.03e-05	9.73998	0.000691094	0.0134297	2.36554	8.23346	52.6866	50.5474	158.279	187.637	transmembrane amino acid transporter protein, putative, expressed
LOC_Os04g47580.1	8.26487	0.000144928	0.00378307	16.7671	1.14e-06	7.15e-05	81.6111	39.9911	1007.15	1031.76	422.364	582.662	cyclin, putative, expressed
LOC_Os04g47770.1	36.9013	1.05e-06	6.26e-05	29.1922	4.15e-06	0.000206759	7.09661	0	113.009	94.1569	88.6017	173.272	cis-zeatin O-glucosyltransferase, putative, expressed
LOC_Os04g47840.1	6599	8.55e-05	0.00250881	2645	0.00104861	0.0187514	0	0	10.69	17.8403	24.0859	26.9335	expressed protein
LOC_Os04g47890.1	14.3356	0.000568172	0.0113917	10.7568	0.00248403	0.0368665	4.73108	1.17621	22.9072	40.6361	34.4084	50.2759	MYB family transcription factor, putative, expressed
LOC_Os04g48070.1	9.44643	0.00111174	0.0196287	8.46626	0.00192081	0.0300454	4.73108	4.70484	41.233	38.6539	35.2687	53.8671	homeobox and START domains containing protein, putative, expressed
LOC_Os04g48200.1	12.8195	8.64e-06	0.000375473	55.8829	1.07e-10	3e-08	27.2037	19.9956	1552.35	1085.28	370.751	234.322	cytochrome P450, putative, expressed
LOC_Os04g48210.1	6599	0.000813339	0.0153009	2645	1.05e-07	9.62e-06	0	0	58.0316	42.6184	12.9032	8.97785	cytochrome P450, putative, expressed
LOC_Os04g48490.1	8.17531	0.000112898	0.00313211	5.47105	0.00152986	0.0252014	295.692	382.268	1678.34	2030.82	2578.05	2964.48	fasciclin-like arabinogalactan protein, putative, expressed
LOC_Os04g48760.1	11.9748	8.43e-06	0.0003677	9.5799	4.36e-05	0.00141251	217.629	168.198	1675.28	2020.9	2132.46	2487.76	leucine-rich repeat family protein, putative, expressed
LOC_Os04g49160.1	19.3049	1.06e-06	6.29e-05	22.5968	3.27e-07	2.48e-05	16.5588	16.4669	419.202	327.071	284.73	352.829	zinc finger, C3HC4 type domain containing protein, expressed
LOC_Os04g49210.1	65.0431	4.3e-09	6.01e-07	268.476	8.89e-14	1.04e-10	0	5.88104	834.586	744.335	245.16	137.361	naringenin,2-oxoglutarate 3-dioxygenase, putative, expressed
LOC_Os04g49757.1	21.3658	4.73e-05	0.001532	19.6528	6.96e-05	0.00205927	2.36554	2.35242	58.0316	34.6894	55.9137	44.8892	purine permease, putative, expressed
LOC_Os04g49990.1	9.1809	6.26e-05	0.00193891	9.60905	4.9e-05	0.00155402	99.3526	92.9205	864.366	983.196	735.48	1029.76	AT hook motif domain containing protein, expressed
LOC_Os04g50030.1	6599	0.000207944	0.00513793	2645	7.51e-05	0.00218659	0	0	25.9615	36.6716	29.2472	17.9557	DNA binding protein, putative, expressed
LOC_Os04g50200.1	6599	1.74e-06	9.72e-05	2645	0.000218763	0.00530914	0	0	14.5079	18.8314	39.5697	43.0937	OsFBX151 - F-box domain containing protein, expressed
LOC_Os04g50930.1	6599	3.55e-13	2.03e-10	2645	1.48e-11	5.75e-09	0	0	181.731	168.491	336.343	237.913	peptide transporter PTR2, putative, expressed
LOC_Os04g50960.1	5.85182	0.00116445	0.0203722	6.8161	0.000464502	0.00976411	85.1594	102.33	650.565	627.382	450.751	646.405	expressed protein
LOC_Os04g51030.1	6599	2.06e-11	6.47e-09	2645	7.62e-10	1.49e-07	0	0	101.555	135.784	185.806	207.388	wall-associated kinase 1, putative, expressed
LOC_Os04g51110.1	5.36591	0.00181763	0.0289061	9.51632	5.27e-05	0.00164714	130.105	102.33	1018.61	1193.32	509.245	737.979	WD repeat-containing protein, putative, expressed
LOC_Os04g51110.2	5.68561	0.00353722	0.0491287	12.5528	4.06e-05	0.00133224	15.376	17.6431	175.622	238.861	79.9996	107.734	WD repeat-containing protein, putative, expressed
LOC_Os04g51400.1	6.5199	0.000502664	0.0103448	5.84155	0.00097335	0.0177232	254.295	188.193	1420.25	1164.57	1614.62	1270.37	zinc finger, C3HC4 type domain containing protein, expressed
LOC_Os04g51520.1	6599	1.42e-05	0.000572161	2645	1.76e-10	4.38e-08	0	0	151.188	96.1392	20.6451	26.0358	glycosyl hydrolases family 16, putative, expressed
LOC_Os04g51580.1	12.8814	6.08e-06	0.000277762	5.83609	0.00104783	0.0187514	138.384	74.1012	717.76	522.323	1485.58	1251.51	leucine rich repeat containing protein, expressed
LOC_Os04g51980.1	6599	6.4e-07	4.21e-05	2645	5.65e-06	0.000264051	0	0	35.1244	22.7959	31.8278	52.9693	transferase family domain containing protein, expressed
LOC_Os04g51990.1	43.9052	6.88e-06	0.000310349	26.9497	9.45e-05	0.00266524	1.18277	1.17621	42.7601	20.8136	54.1933	49.3781	transferase family domain containing protein, expressed
LOC_Os04g53680.1	8.26196	0.000639712	0.0125489	8.71201	0.000505386	0.0104223	16.5588	16.4669	142.025	145.695	166.021	106.836	cyclin, putative, expressed
LOC_Os04g53950.1	40.4224	1.69e-09	2.74e-07	47.1208	5.84e-10	1.19e-07	33.1175	22.348	1130.85	1482.72	1062.36	1179.69	glycosyl hydrolases family 16 protein, protein, expressed
LOC_Os04g53950.2	31.7406	5.4e-08	5.19e-06	31.64	6.49e-08	6.38e-06	13.0105	7.05725	257.324	377.619	277.848	359.114	glycosyl hydrolases family 16 protein, protein, expressed
LOC_Os04g54930.1	24.0036	1.98e-07	1.58e-05	30.1878	3.83e-08	4.07e-06	13.0105	18.8193	457.381	503.492	307.956	456.075	ABC transporter, ATP-binding protein, putative, expressed
LOC_Os04g55120.1	30.3004	4.98e-07	3.45e-05	26.9137	1.23e-06	7.58e-05	5.91384	4.70484	125.226	160.562	156.558	165.192	jp18, putative, expressed
LOC_Os04g55170.1	188.165	7.68e-09	9.81e-07	68.8206	5.83e-06	0.000270326	1.18277	0	32.8337	48.5651	104.946	117.61	LTPL126 - Protease inhibitor/seed storage/LTP family protein precursor, expressed
LOC_Os04g55570.1	6.14738	0.000750585	0.0142948	10.0997	3.32e-05	0.00112453	171.501	143.497	1407.27	1774.11	927.307	1009.11	plant protein of unknown function DUF869 domain containing protein, expressed
LOC_Os04g55600.1	10.4955	5.31e-05	0.0016862	14.4274	6.43e-06	0.000293095	29.5692	23.5242	406.221	359.779	294.192	263.051	expressed protein
LOC_Os04g55620.1	8.28914	0.000117383	0.00322369	5.18017	0.0022877	0.0345492	140.75	147.026	694.852	795.874	1171.61	1213.8	receptor kinase, putative, expressed
LOC_Os04g56170.1	96.9444	8.2e-10	1.48e-07	68.6325	1.05e-08	1.37e-06	2.36554	2.35242	157.296	166.509	216.773	240.606	OsSPL8 - SBP-box gene family member, expressed
LOC_Os04g56240.1	486.075	1.22e-11	4.27e-09	121.775	1.69e-07	1.41e-05	1.18277	0	58.7952	85.2368	218.494	356.42	lipase, putative, expressed
LOC_Os04g56850.1	11.2506	4.06e-05	0.00135331	19.9743	9.8e-07	6.28e-05	21.2898	19.9956	319.174	505.474	218.494	245.993	auxin response factor, putative, expressed
LOC_Os04g56995.1	51.6445	7.07e-05	0.00213342	38.0136	0.000321262	0.00734383	0	1.17621	22.9072	21.8048	27.5268	33.218	expressed protein
LOC_Os04g57400.1	9.57336	4.27e-05	0.00140672	8.15663	0.000113618	0.00311886	141.932	215.246	1691.32	1222.06	1177.63	2241.77	methylthioribose kinase, putative, expressed
LOC_Os04g58080.1	5.70366	0.00298967	0.0429098	8.41842	0.000366808	0.00816222	26.0209	16.4669	173.331	184.349	145.376	96.9607	polygalacturonase inhibitor 3 precursor, putative, expressed
LOC_Os04g59260.1	40.9171	1.57e-09	2.57e-07	51.4257	3.29e-10	7.29e-08	11.8277	47.0484	1098.02	1929.72	1062.36	1346.68	peroxidase precursor, putative, expressed
LOC_Os05g01140.1	18.2743	1e-05	0.00042456	17.8403	1.16e-05	0.000472626	8.27938	5.88104	126.753	125.873	77.419	181.352	methyltransferase, putative, expressed
LOC_Os05g01570.1	25.4006	8.89e-07	5.57e-05	10.528	0.000215693	0.00525415	11.8277	4.70484	97.7375	76.3167	210.752	209.184	auxin-induced protein 5NG4, putative, expressed
LOC_Os05g02070.2	112.647	2.8e-13	1.74e-10	143.323	4.49e-14	6.99e-11	39.0314	43.5197	5067.08	6764.43	4134.17	5164.95	expressed protein
LOC_Os05g02070.3	102.967	1.27e-11	4.33e-09	154.732	4.53e-13	3.7e-10	3.54831	7.05725	962.103	678.921	486.019	606.005	expressed protein
LOC_Os05g02390.1	35.1229	1.94e-06	0.000105618	84.7289	5.56e-09	7.94e-07	0	4.70484	232.127	166.509	101.505	63.7427	ZOS5-02 - C2H2 zinc finger protein, expressed
LOC_Os05g02420.1	16.3825	1.01e-06	6.07e-05	11.2062	1.67e-05	0.000641447	124.191	85.8633	1084.28	1269.63	1726.44	1714.77	expressed protein
LOC_Os05g02890.1	6.03741	0.000843089	0.0157176	5.27084	0.00176991	0.0282029	199.888	112.916	972.793	675.948	975.479	913.047	white-brown complex homolog protein 16, putative, expressed
LOC_Os05g03120.1	36.2292	6.46e-09	8.51e-07	26.8237	7.22e-08	6.94e-06	15.376	24.7004	453.563	621.436	611.61	840.326	retrotransposon protein, putative, unclassified, expressed
LOC_Os05g03640.1	6599	1.29e-11	4.35e-09	2645	5.65e-05	0.00174035	0	0	20.6165	19.8225	272.687	202.002	flavonol synthase/flavanone 3-hydroxylase, putative, expressed
LOC_Os05g03810.1	19.7504	4.06e-07	2.88e-05	7.11784	0.000399767	0.00875596	62.6868	42.3435	431.419	316.169	1262.79	811.597	trehalose phosphatase, putative, expressed
LOC_Os05g03884.1	49.2854	1.03e-08	1.26e-06	62.6507	1.89e-09	3.22e-07	7.09661	3.52863	313.829	351.85	199.569	324.1	homeobox protein knotted-1-like 6, putative, expressed
LOC_Os05g04170.1	4.79941	0.00285342	0.0414271	6.71814	0.000373287	0.00827259	1168.58	978.606	7415.83	7009.24	4573.74	5731.46	AMP-binding enzyme, putative, expressed
LOC_Os05g04170.2	5.99671	0.0014444	0.0240594	9.76331	7.17e-05	0.00210527	33.1175	34.1101	355.062	301.302	184.085	219.059	AMP-binding enzyme, putative, expressed
LOC_Os05g04500.1	226.067	1.67e-14	1.65e-11	245.59	7.62e-15	1.56e-11	7.09661	3.52863	1527.15	1082.31	832.684	1569.33	peroxidase precursor, putative, expressed
LOC_Os05g05580.1	6599	0.00014954	0.00388483	2645	0.000100573	0.00280797	0	0	21.3801	35.6805	14.6236	35.9114	expressed protein
LOC_Os05g05820.1	9.49771	0.00105647	0.0188053	9.90411	0.000976363	0.0177583	3.54831	10.5859	55.7409	84.2457	71.3975	62.8449	pro-resilin precursor, putative, expressed
LOC_Os05g06780.1	6599	0.000106603	0.00299572	2645	5.91e-09	8.29e-07	0	0	93.9196	77.3078	12.043	22.4446	LTPL104 - Protease inhibitor/seed storage/LTP family protein precursor, expressed
LOC_Os05g06970.1	10.0508	3.24e-05	0.00112141	8.87275	7.27e-05	0.00213091	146.663	111.74	1272.88	1019.87	1277.41	1319.74	peroxidase precursor, putative, expressed
LOC_Os05g07060.1	813.195	3.03e-16	5.22e-13	316.108	5.29e-13	4.02e-10	2.36554	0	447.454	300.311	829.243	1094.4	fasciclin domain containing protein, expressed
LOC_Os05g07600.1	23.6393	4.76e-05	0.0015373	52.5357	5.41e-07	3.78e-05	4.73108	0	103.846	144.704	49.8922	61.9471	expressed protein
LOC_Os05g08530.1	41.7889	2.75e-07	2.09e-05	24.4047	9.43e-06	0.000402816	4.73108	2.35242	71.776	101.095	170.322	125.69	phototropic-responsive NPH3 family protein, putative, expressed
LOC_Os05g09480.1	6.69851	0.00309625	0.0441871	7.75568	0.00155186	0.0254996	9.46215	15.2907	100.792	91.1835	109.247	56.5604	OsIAA16 - Auxin-responsive Aux/IAA gene family member, expressed
LOC_Os05g09704.1	1045.59	3e-18	1.96e-14	598.742	2.8e-16	8.09e-13	1.18277	2.35242	1145.36	971.303	1126.02	2570.36	HAD superfamily phosphatase, putative, expressed
LOC_Os05g09724.1	6599	0.000141271	0.00369645	2645	8.33e-05	0.00239603	0	0	20.6165	32.7071	7.7419	38.6047	HAD superfamily phosphatase, putative, expressed
LOC_Os05g10210.1	590.631	9.55e-17	1.95e-13	267.779	6.92e-14	9.16e-11	2.36554	2.35242	539.847	723.522	784.512	2002.06	HAD superfamily phosphatase, putative, expressed
LOC_Os05g10370.1	35.3227	0.000126287	0.00340602	19.2862	0.00335748	0.0466109	1.18277	0	9.92646	12.8846	30.1074	11.6712	acid phosphatase, putative, expressed
LOC_Os05g10690.1	15.633	0.000154738	0.0040008	20.1719	3.57e-05	0.00119378	7.09661	0	81.7024	61.4498	49.8922	61.0493	Myb transcription factor, putative, expressed
LOC_Os05g11414.1	35.0402	0.000537945	0.01094	42.6938	0.000253938	0.00598927	1.18277	0	16.7986	33.6983	17.2042	24.2402	OsMADS58 - MADS-box family gene with MIKCc type-box, expressed
LOC_Os05g11570.1	17.4647	4.58e-06	0.000220334	22.8641	7.78e-07	5.2e-05	7.09661	15.2907	241.289	270.577	174.623	216.366	NLI interacting factor-like phosphatase, putative, expressed
LOC_Os05g13630.1	6599	0.00341771	0.0477531	2645	0.00188003	0.0295273	0	0	12.2172	24.7781	18.9246	9.87563	RNA recognition motif containing protein, putative, expressed
LOC_Os05g13900.1	20.631	1.93e-05	0.000745027	13.2009	0.000333117	0.00752595	2.36554	3.52863	28.2522	49.5563	52.4729	69.1294	retrotransposon protein, putative, unclassified, expressed
LOC_Os05g13940.1	38.9041	9.98e-10	1.74e-07	41.8431	6.33e-10	1.26e-07	281.499	241.123	9049.88	12818.2	5837.39	14494.7	retrotransposon protein, putative, unclassified, expressed
LOC_Os05g14220.1	40.9461	1.71e-06	9.63e-05	48.8079	5.94e-07	4.09e-05	3.54831	1.17621	127.517	103.077	113.548	79.9028	tyrosine protein kinase domain containing protein, putative, expressed
LOC_Os05g14240.1	8.95495	6.53e-05	0.00200496	7.32953	0.000242332	0.00576129	149.029	157.612	1221.72	1025.81	1529.46	1216.5	aquaporin protein, putative, expressed
LOC_Os05g15510.1	12.6653	7.09e-06	0.000316568	10.6133	2.65e-05	0.000939109	56.7729	92.9205	728.45	860.297	888.598	1007.31	cellulase, putative, expressed
LOC_Os05g15630.1	6599	5.23e-08	5.06e-06	2645	2.64e-10	6.25e-08	0	0	147.37	113.979	48.1718	72.7205	membrane associated DUF588 domain containing protein, putative, expressed
LOC_Os05g15770.1	68.6684	1.42e-11	4.69e-09	51.2764	1.45e-10	3.82e-08	44.9452	58.8104	2940.52	2379.69	3310.95	3813.79	glycosyl hydrolase, putative, expressed
LOC_Os05g15850.1	6599	6.13e-10	1.19e-07	2645	7.49e-06	0.000330874	0	0	20.6165	33.6983	98.0641	120.303	glycosyl hydrolase, putative, expressed
LOC_Os05g16240.1	30.6079	0.000167084	0.004266	30.4169	0.000200672	0.00497356	0	2.35242	25.9615	45.5918	36.9891	35.0136	expressed protein
LOC_Os05g16640.1	11.6967	1.36e-05	0.000548186	15.4698	2.01e-06	0.000114562	69.7834	62.3391	980.429	1063.48	753.545	791.846	DUF630/DUF632 domains containing protein, putative, expressed
LOC_Os05g17604.1	19.4428	7.91e-07	5.07e-05	8.7593	0.000163034	0.00419014	42.5797	16.4669	293.212	223.994	827.523	320.509	SHR5-receptor-like kinase, putative, expressed
LOC_Os05g18294.1	6599	0.001893	0.0298866	2645	0.0005954	0.0119102	0	0	12.9808	16.8491	3.44084	18.8535	SEC14 cytosolic factor family protein, putative, expressed
LOC_Os05g18604.1	6599	0.00069917	0.0135125	2645	0.00022097	0.00535476	0	0	22.1436	10.9024	18.0644	8.08006	OsSCP28 - Putative Serine Carboxypeptidase homologue, expressed
LOC_Os05g20020.1	38.918	9.88e-07	5.99e-05	31.2837	4.04e-06	0.00020319	5.91384	0	80.9389	104.068	74.8384	155.317	polygalacturonase, putative, expressed
LOC_Os05g25480.1	6599	8.46e-09	1.06e-06	2645	1.95e-09	3.28e-07	0	0	107.664	88.2102	69.6771	88.8807	OsMan06 - Endo-Beta-Mannanase, expressed
LOC_Os05g28040.1	47.0563	2.42e-05	0.000891538	29.8699	0.000209353	0.00513803	2.36554	0	38.9423	31.716	61.9352	49.3781	DUF640 domain containing protein, putative, expressed
LOC_Os05g28780.1	6599	0.00242407	0.0364616	2645	5.73e-06	0.000267181	0	0	50.3959	23.787	9.46232	10.7734	GCRP10 - Glycine and cysteine rich family protein precursor, expressed
LOC_Os05g28830.1	18.1676	2.09e-05	0.000796072	12.5375	0.000168831	0.00430861	7.09661	4.70484	85.5203	62.4409	86.0211	128.383	PMR5, putative, expressed
LOC_Os05g29710.1	17.9712	5.37e-07	3.66e-05	11.3861	1.49e-05	0.000580565	145.481	41.1673	1083.51	1041.67	2072.25	1282.04	RING-H2 finger protein, putative, expressed
LOC_Os05g30250.1	8.43485	0.000358296	0.00798081	11.8346	4.33e-05	0.00140547	35.4831	2.35242	253.507	194.261	134.193	184.944	Os5bglu19 - beta-glucosidase homologue, similar to G. max isohydroxyurate hydrolase, expressed
LOC_Os05g30790.1	5.71957	0.0021158	0.0326643	6.60897	0.00104876	0.0187514	30.752	54.1056	246.634	314.187	275.268	210.082	CW-type Zinc Finger, putative, expressed
LOC_Os05g31140.1	17.2439	5.67e-07	3.84e-05	29.935	7.7e-09	1.04e-06	159.674	130.559	5421.38	3266.75	3194.82	1809.93	glycosyl hydrolases family 17, putative, expressed
LOC_Os05g31910.1	6599	9.65e-07	5.9e-05	2645	8.18e-08	7.81e-06	0	0	86.2839	45.5918	44.731	43.9914	white-brown complex homolog protein 16, putative, expressed
LOC_Os05g33090.1	17.0139	7.38e-05	0.00221578	15.9562	0.000124146	0.00334324	5.91384	1.17621	42.7601	70.3699	54.1933	66.4361	expressed protein
LOC_Os05g33630.1	137.611	1.84e-13	1.25e-10	56.9673	2.17e-10	5.25e-08	9.46215	17.6431	858.257	685.859	2350.1	1379.89	inosine-uridine preferring nucleoside hydrolase family protein, putative, expressed
LOC_Os05g34150.1	26.6306	3.66e-08	3.71e-06	17.1021	1.08e-06	6.85e-05	37.8486	56.458	730.74	882.102	978.92	1532.52	glutathione S-transferase, putative, expressed
LOC_Os05g34700.1	15.3073	1.26e-06	7.24e-05	12.045	7.77e-06	0.000341143	535.794	441.078	5511.48	6254.99	7157.82	7795.46	GDSL-like lipase/acylhydrolase, putative, expressed
LOC_Os05g35070.1	13.0832	2.69e-05	0.000967473	18.4445	3.16e-06	0.000164369	16.5588	11.7621	226.018	296.347	170.322	200.206	DUF630/DUF632 domains containing protein, putative, expressed
LOC_Os05g35140.1	6599	2.56e-11	7.9e-09	2645	1.95e-08	2.33e-06	0	0	83.9931	63.432	216.773	182.25	nodulin MtN3 family protein, putative, expressed
LOC_Os05g35200.2	6.78712	0.000501225	0.0103282	6.6174	0.000596057	0.011916	57.9557	49.4008	356.589	353.832	316.558	412.083	glycosyl transferase, putative, expressed
LOC_Os05g35240.1	48.815	0.000309009	0.00711679	44.4925	0.000495837	0.0102838	0	1.17621	20.6165	31.716	21.5053	35.9114	expressed protein
LOC_Os05g35480.1	5.31636	0.00163052	0.0265904	4.73127	0.00333841	0.0464844	489.666	523.413	2331.19	2461.96	2649.45	2736.45	anthranilate phosphoribosyltransferase, putative, expressed
LOC_Os05g36900.1	58.1947	0.000103067	0.00292899	27.0463	0.0028351	0.0409061	0	1.17621	12.9808	18.8314	36.1289	32.3202	dof zinc finger domain containing protein, putative, expressed
LOC_Os05g37130.1	152.263	1.67e-11	5.31e-09	54.027	3.84e-08	4.07e-06	1.18277	3.52863	133.625	120.917	369.031	348.34	glycosyl hydrolases family 17, putative, expressed
LOC_Os05g37130.2	6599	0.000189959	0.00476076	2645	0.00274616	0.0398517	0	0	13.7443	9.91125	24.0859	26.0358	glycosyl hydrolases family 17, putative, expressed
LOC_Os05g37470.1	6.29447	0.00247847	0.0371725	8.28447	0.000662677	0.0130482	20.1071	11.7621	98.5011	165.518	93.763	106.836	transmembrane amino acid transporter protein, putative, expressed
LOC_Os05g38000.1	22.0932	9.17e-08	8.21e-06	17.9983	4.36e-07	3.15e-05	136.018	176.431	2923.73	2699.83	3145.79	3757.23	ATROPGEF7/ROPGEF7, putative, expressed
LOC_Os05g38410.1	8.55701	0.000100393	0.00286544	6.2404	0.000736053	0.0141435	102.901	127.031	709.36	725.504	420.643	1546.88	laccase precursor protein, putative, expressed
LOC_Os05g38420.1	8.08895	0.000352181	0.00789311	7.84167	0.000450907	0.00958317	18.9243	25.8766	148.133	203.181	68.8169	293.576	laccase precursor protein, putative, expressed
LOC_Os05g38480.1	7.92188	0.000183037	0.0046156	8.71915	0.000103586	0.00287739	75.6972	88.2157	681.872	747.309	568.599	729.899	kinesin motor domain containing protein, putative, expressed
LOC_Os05g38890.1	6599	0.0012074	0.020978	2645	0.000600466	0.0119888	0	0	22.9072	21.8048	20.6451	15.2623	transposon protein, putative, CACTA, En/Spm sub-class, expressed
LOC_Os05g39120.1	18.0986	8.85e-06	0.000383522	16.3259	1.65e-05	0.000632586	8.27938	8.23346	149.661	119.926	146.236	152.623	expressed protein
LOC_Os05g39500.1	51.1824	5e-07	3.46e-05	19.6292	0.000142959	0.00376648	2.36554	2.35242	35.1244	57.4853	144.515	96.9607	DUF640 domain containing protein, putative, expressed
LOC_Os05g39800.1	6599	8.17e-06	0.000359203	2645	6.97e-05	0.00206142	0	0	19.8529	18.8314	18.0644	39.5025	NFD4, putative, expressed
LOC_Os05g39840.1	7.64036	0.000282394	0.00664342	8.33728	0.00018071	0.00455835	44.9452	59.9867	390.186	484.66	411.181	390.536	expressed protein
LOC_Os05g39880.1	23.6257	1.83e-05	0.000709985	17.9922	9.22e-05	0.00261526	3.54831	3.52863	54.9773	72.3522	77.419	89.7785	expressed protein
LOC_Os05g40384.1	12.1799	0.000230214	0.00558961	12.8277	0.000157939	0.00408814	8.27938	7.05725	121.408	75.3255	80.8598	105.939	cytochrome P450, putative, expressed
LOC_Os05g41390.1	14.4812	2.87e-06	0.00014708	23.9351	6.98e-08	6.78e-06	67.4178	51.7532	1483.62	1368.74	735.48	990.256	cyclin, putative, expressed
LOC_Os05g41610.1	139.119	5.89e-12	2.38e-09	84.3126	2.78e-10	6.54e-08	0	7.05725	321.465	273.551	419.783	562.013	glycosyl hydrolases family 17, putative, expressed
LOC_Os05g43140.1	5.94838	0.00116423	0.0203722	10.1819	3.76e-05	0.00125302	87.5249	54.1056	784.954	657.116	320.859	521.613	expressed protein
LOC_Os05g43310.1	30.2621	3.34e-08	3.43e-06	44.7682	1.68e-09	2.9e-07	16.5588	16.4669	775.791	702.708	365.59	633.836	photosystem II reaction center W protein, chloroplast precursor, putative, expressed
LOC_Os05g43760.1	37.3293	1.92e-08	2.12e-06	23.0442	7.54e-07	5.04e-05	4.73108	11.7621	158.06	222.012	271.827	343.851	TCP family transcription factor, putative, expressed
LOC_Os05g43860.1	21.024	3.68e-07	2.65e-05	7.98548	0.000265244	0.00620663	31.9348	21.1718	219.909	204.172	377.633	738.877	expressed protein
LOC_Os05g43910.1	54.973	7.56e-08	6.96e-06	9.4735	0.00229523	0.0346023	1.18277	4.70484	29.0158	26.7604	153.978	169.681	cytochrome P450, putative, expressed
LOC_Os05g44190.1	9.7269	6.35e-05	0.00196029	12.0489	1.69e-05	0.000645297	42.5797	45.8722	487.924	577.826	466.234	394.127	expressed protein
LOC_Os05g45430.1	38.4004	2.04e-08	2.23e-06	37.2109	2.84e-08	3.14e-06	7.09661	11.7621	319.174	382.574	356.988	367.194	TOO MANY MOUTHS precursor, putative, expressed
LOC_Os05g45460.1	6599	4.94e-08	4.81e-06	2645	1.33e-10	3.56e-08	0	0	182.494	158.58	69.6771	66.4361	POEI52 - Pollen Ole e I allergen and extensin family protein precursor, expressed
LOC_Os05g47540.1	76.6014	8.81e-09	1.09e-06	86.5224	4.18e-09	6.18e-07	2.36554	1.17621	119.118	187.323	78.2792	193.024	CPuORF26 - conserved peptide uORF-containing transcript, expressed
LOC_Os05g48640.1	6599	3.86e-08	3.9e-06	2645	1.26e-07	1.12e-05	0	0	71.0124	37.6628	58.4944	75.4139	ATROPGEF7/ROPGEF7, putative, expressed
LOC_Os05g48660.1	28.2702	9.87e-08	8.77e-06	17.3876	2.99e-06	0.000157069	22.4726	7.05725	282.522	230.932	455.052	379.763	MRH1, putative, expressed
LOC_Os05g48850.1	5.29654	0.00274037	0.0402146	5.07614	0.00333499	0.0464567	30.752	48.2246	214.564	186.332	145.376	272.926	no apical meristem protein, putative, expressed
LOC_Os05g49370.1	6599	1.99e-15	2.7e-12	2645	2.53e-11	9e-09	0	0	185.548	113.979	481.718	556.626	DUF1645 domain containing protein, putative, expressed
LOC_Os05g49820.1	10.6903	0.000112046	0.00311907	15.6801	1.01e-05	0.000423794	13.0105	11.7621	193.184	195.252	103.225	161.601	chloroplast unusual positioning protein, putative, expressed
LOC_Os05g49840.1	30.5017	5.19e-05	0.00165626	60.4131	9.33e-07	6.06e-05	2.36554	0	72.5395	70.3699	33.5482	38.6047	phospholipase, putative, expressed
LOC_Os05g51240.1	6599	1.58e-05	0.000627128	2645	0.000824021	0.0154965	0	0	19.0894	7.929	30.9676	37.707	hydrolase, alpha/beta fold family domain containing protein, expressed
LOC_Os05g51620.1	107.078	5.65e-13	2.98e-10	70.2198	1.88e-11	6.91e-09	42.5797	18.8193	2012.02	2299.41	2979.77	3594.73	expressed protein
LOC_Os05g51740.1	13.6044	2.35e-05	0.00087128	6.98719	0.00135626	0.0229434	16.5588	15.2907	94.6832	127.855	192.687	240.606	receptor protein kinase CLAVATA1 precursor, putative, expressed
LOC_Os05g51820.1	17.881	0.000550246	0.0111141	27.235	7.42e-05	0.00217329	1.18277	2.35242	42.7601	53.5208	32.688	30.5247	helix-loop-helix DNA-binding protein, putative, expressed
LOC_Os06g01934.1	169.438	3.12e-11	9.28e-09	78.7999	8.98e-09	1.19e-06	1.18277	2.35242	142.788	135.784	263.225	335.771	homeobox domain containing protein, expressed
LOC_Os06g01972.1	18.3099	0.000131938	0.00351416	9.22786	0.00355666	0.0486127	1.18277	4.70484	30.543	23.787	39.5697	68.2316	auxin-induced protein 5NG4, putative, expressed
LOC_Os06g03059.1	19.2149	0.000125044	0.00338572	20.1521	0.000107158	0.00296145	3.54831	1.17621	39.7059	55.503	38.7095	52.0715	expressed protein
LOC_Os06g03080.1	14.2492	3.64e-05	0.00123903	19.3894	6.43e-06	0.000293095	9.46215	7.05725	109.191	211.11	98.9243	136.463	aspartic protease, putative, expressed
LOC_Os06g03120.1	14.6965	0.00342534	0.0478187	15.2768	0.00337768	0.046792	1.18277	2.35242	18.3258	35.6805	23.2257	28.7291	aspartic proteinase nepenthesin-2 precursor, putative, expressed
LOC_Os06g03150.1	18.5417	4.44e-06	0.000215081	14.3441	2.43e-05	0.000877842	14.1932	5.88104	141.261	146.687	172.902	199.308	expressed protein
LOC_Os06g03710.1	10.9847	2.23e-05	0.00083553	20.882	2.35e-07	1.89e-05	47.3108	52.9294	1017.84	1075.37	504.084	597.027	DELLA protein SLR1, putative, expressed
LOC_Os06g03830.1	59.8308	4.03e-10	8.34e-08	10.2611	0.000110556	0.00304762	17.7415	7.05725	130.571	123.891	1014.19	469.541	retinol dehydrogenase, putative, expressed
LOC_Os06g03980.1	6.87352	0.00216442	0.0332403	17.7246	9.15e-06	0.000391056	9.46215	9.40967	167.986	166.509	72.2577	57.4582	expressed protein
LOC_Os06g04370.1	58.1291	9.81e-10	1.73e-07	57.5766	1.18e-09	2.17e-07	1.18277	12.9383	358.116	454.927	343.224	477.621	expressed protein
LOC_Os06g05630.1	12.1997	1.1e-05	0.000456118	7.12513	0.000410311	0.00890221	61.504	54.1056	368.806	454.927	493.761	916.638	GDSL-like lipase/acylhydrolase, putative, expressed
LOC_Os06g08340.1	53.8342	1.44e-06	8.22e-05	21.4837	0.000196318	0.00488789	3.54831	0	43.5237	32.7071	107.526	83.494	AP2 domain containing protein, expressed
LOC_Os06g09220.1	6599	1.58e-05	0.000627128	2645	0.000325319	0.00741065	0	0	18.3258	13.8758	28.387	33.218	cytochrome P450 72A1, putative, expressed
LOC_Os06g09410.1	17.7048	0.000436705	0.00929163	17.3495	0.000545474	0.0110811	0	4.70484	32.0701	49.5563	45.5912	37.707	transposon protein, putative, CACTA, En/Spm sub-class, expressed
LOC_Os06g10310.1	78.2811	6.28e-09	8.35e-07	22.0472	2.38e-05	0.000860324	5.91384	0	58.0316	72.3522	274.407	188.535	growth regulating factor protein, putative, expressed
LOC_Os06g10750.1	1005.05	3.85e-17	8.98e-14	606.105	2.45e-15	5.33e-12	0	2.35242	723.105	702.708	1017.63	1346.68	integral membrane protein DUF6 containing protein, expressed
LOC_Os06g10910.1	6599	0.00062938	0.012361	2645	0.00149107	0.0246869	0	0	17.5622	16.8491	17.2042	27.8313	xyloglucan fucosyltransferase, putative, expressed
LOC_Os06g10920.1	6599	0.000321731	0.00736309	2645	0.00075344	0.0144351	0	0	16.7986	21.8048	24.0859	24.2402	xyloglucan fucosyltransferase, putative, expressed
LOC_Os06g10930.1	6599	0.000561621	0.0112948	2645	0.000846624	0.0158668	0	0	13.7443	25.7693	19.7849	23.3424	xyloglucan fucosyltransferase, putative, expressed
LOC_Os06g10990.1	6599	1.37e-05	0.000553692	2645	0.000138826	0.00368391	0	0	16.7986	22.7959	22.3655	40.4003	DnaK family protein, putative, expressed
LOC_Os06g11330.1	27.8291	0.00055933	0.0112697	26.3534	0.000694546	0.0134807	2.36554	0	33.5973	28.7426	34.4084	31.4225	OsMADS55 - MADS-box family gene with MIKCc type-box, expressed
LOC_Os06g11490.1	6.86636	0.000423399	0.00906647	5.49914	0.00159951	0.0261117	81.6111	118.797	558.936	543.137	416.342	959.732	plastocyanin-like domain containing protein, putative, expressed
LOC_Os06g12410.1	22.3575	4.8e-06	0.000227108	10.5765	0.000394288	0.00866162	4.73108	7.05725	67.1945	57.4853	91.1824	172.375	GDSL-like lipase/acylhydrolase, putative, expressed
LOC_Os06g12820.1	107.493	5.17e-07	3.55e-05	129.877	1.44e-07	1.25e-05	1.18277	0	93.156	60.4587	49.032	78.1073	proteins of unknown function domain containing protein, expressed
LOC_Os06g12980.1	42.2812	0.000638	0.0125228	35.3445	0.00142823	0.0239062	1.18277	0	16.0351	25.7693	26.6665	23.3424	cyclin, putative, expressed
LOC_Os06g13210.1	12.7502	0.000464031	0.00969389	16.7464	0.00012627	0.00339484	7.09661	1.17621	57.2681	81.2723	51.6127	53.8671	peptide transporter PTR2, putative, expressed
LOC_Os06g14324.1	28.9111	5.99e-08	5.63e-06	52.759	6.25e-10	1.25e-07	15.376	15.2907	876.583	741.362	338.063	548.546	caleosin related protein, putative, expressed
LOC_Os06g14540.1	24.7723	8.16e-08	7.45e-06	15.9877	2.2e-06	0.000121948	31.9348	34.1101	481.052	574.853	670.965	965.118	endoglucanase, putative, expressed
LOC_Os06g14630.1	6599	0.00101402	0.0182284	2645	6.12e-06	0.000281143	0	0	49.6323	25.7693	12.9032	12.569	GDSL-like lipase/acylhydrolase, putative, expressed
LOC_Os06g15170.1	6599	2.23e-05	0.00083553	2645	0.00061236	0.0121675	0	0	9.92646	19.8225	14.6236	44.8892	3-ketoacyl-CoA synthase, putative, expressed
LOC_Os06g15480.1	15.9997	3.85e-06	0.000191684	7.70839	0.000466192	0.00978153	21.2898	30.5814	174.858	224.985	402.579	427.345	transcription factor, putative, expressed
LOC_Os06g16000.1	186.618	3.29e-08	3.38e-06	62.7495	2.3e-05	0.000832888	1.18277	0	23.6708	50.5474	85.1609	135.565	UDP-glucoronosyl and UDP-glucosyl transferase, putative, expressed
LOC_Os06g16350.1	138.908	7.84e-11	1.99e-08	238.047	1.09e-12	7.11e-10	3.54831	0	494.796	349.867	164.3	328.589	peroxidase precursor, putative, expressed
LOC_Os06g16640.1	6599	2.46e-05	0.000903959	2645	0.00187278	0.0294815	0	0	11.4536	9.91125	18.9246	37.707	carboxyl-terminal peptidase, putative, expressed
LOC_Os06g17490.1	6.97761	0.000382229	0.00838363	10.2535	3.08e-05	0.00106356	108.815	99.9778	1114.05	1026.81	621.933	834.94	expressed protein
LOC_Os06g18670.1	26.1956	4.17e-06	0.000204402	55.8747	2.24e-08	2.57e-06	2.36554	2.35242	83.2296	180.385	27.5268	96.0629	anthocyanidin 3-O-glucosyltransferase, putative, expressed
LOC_Os06g18820.1	15.3162	5.12e-05	0.00163792	8.14339	0.00167078	0.0270372	8.27938	7.05725	56.5045	68.3877	110.107	124.792	serine threonine kinase, putative, expressed
LOC_Os06g18960.1	28.168	1.92e-05	0.000743041	42.3784	1.78e-06	0.000103453	0	4.70484	109.191	90.1924	49.032	83.494	embryogenesis transmembrane protein, putative, expressed
LOC_Os06g19095.1	7.58726	0.00026698	0.00634096	5.47939	0.00183249	0.0289318	72.1489	102.33	536.793	419.246	790.534	533.284	expressed protein
LOC_Os06g19550.1	47.5646	1.97e-07	1.58e-05	27.1635	8.1e-06	0.000353529	0	4.70484	63.3766	64.4232	138.494	85.2895	oxidoreductase, short chain dehydrogenase/reductase family, putative, expressed
LOC_Os06g19590.1	29.849	6.15e-08	5.75e-06	17.3142	3.04e-06	0.000159317	10.6449	19.9956	271.832	258.684	540.213	374.376	estradiol 17-beta-dehydrogenase 12, putative, expressed
LOC_Os06g20200.1	17.2551	2.59e-06	0.000134966	11.3405	4.63e-05	0.00147688	10.6449	29.4052	215.328	238.861	395.697	295.371	gibberellin receptor GID1L2, putative, expressed
LOC_Os06g20570.1	6599	4.93e-05	0.00158585	2645	0.000155177	0.00403583	0	0	17.5622	34.6894	23.2257	43.9914	glycosyltransferase, putative, expressed
LOC_Os06g20900.1	6599	2.12e-14	1.98e-11	2645	2.36e-09	3.8e-07	0	0	106.9	70.3699	437.847	447.994	expressed protein
LOC_Os06g20920.1	6599	3.22e-10	6.83e-08	2645	7e-09	9.53e-07	0	0	97.7375	68.3877	134.193	130.179	SAM dependent carboxyl methyltransferase, putative, expressed
LOC_Os06g21110.1	6599	9.54e-12	3.58e-09	2645	1.71e-08	2.08e-06	0	0	54.2138	77.3078	117.849	244.197	expressed protein
LOC_Os06g21140.1	11.9356	1.56e-05	0.000619074	7.9379	0.000239857	0.00571916	43.7625	28.229	274.123	297.338	368.17	491.088	glycine-rich cell wall structural protein precursor, putative, expressed
LOC_Os06g21210.1	1012.29	3.69e-17	8.98e-14	668.63	1.1e-15	2.75e-12	1.18277	1.17621	810.152	767.131	948.813	1439.15	glycine rich protein family protein, putative, expressed
LOC_Os06g21230.1	6599	0.000580371	0.0116066	2645	4.93e-06	0.000236462	0	0	27.4887	29.7338	5.16127	18.8535	glycine rich protein family protein, putative, expressed
LOC_Os06g21240.1	146.612	9.25e-12	3.56e-09	157.878	5.63e-12	2.79e-09	0	4.70484	334.445	408.344	260.644	429.141	glycine rich protein family protein, putative, expressed
LOC_Os06g21250.1	301.639	1.27e-12	5.76e-10	148.609	3.08e-10	7.08e-08	0	2.35242	167.223	182.367	218.494	491.088	glycine rich protein family protein, putative, expressed
LOC_Os06g21270.1	524.806	8.01e-15	9.35e-12	306.236	6.56e-13	4.76e-10	2.36554	0	332.918	391.495	394.837	846.611	glycine rich protein family protein, putative, expressed
LOC_Os06g21270.2	6599	8.55e-09	1.07e-06	2645	3.26e-07	2.48e-05	0	0	31.3065	61.4498	61.075	94.2674	glycine rich protein family protein, putative, expressed
LOC_Os06g22060.1	14.148	5.99e-06	0.000274592	56.1801	1.74e-10	4.38e-08	21.2898	23.5242	1372.91	1144.75	159.999	474.03	pyrophosphate--fructose 6-phosphate 1-phosphotransferase subunit alpha, putative, expressed
LOC_Os06g22440.1	6599	9.12e-10	1.62e-07	2645	1.29e-08	1.64e-06	0	0	105.373	55.503	126.451	120.303	SAM dependent carboxyl methyltransferase, putative, expressed
LOC_Os06g23910.1	6599	6.98e-05	0.00211127	2645	3.32e-05	0.00112478	0	0	19.0894	38.6539	24.9461	22.4446	expressed protein
LOC_Os06g24490.1	40.922	1.86e-05	0.000721005	50.4472	5.91e-06	0.000273869	2.36554	0	61.8495	57.4853	44.731	52.0715	expressed protein
LOC_Os06g24990.1	8.29158	0.000580164	0.0116066	10.0218	0.000193768	0.00483178	3.54831	11.7621	77.121	76.3167	73.9781	52.9693	xylanase inhibitor protein 1 precursor, putative, expressed
LOC_Os06g25010.1	12.097	5.7e-05	0.00179365	10.8139	9.08e-05	0.00257783	10.6449	3.52863	117.59	35.6805	103.225	68.2316	glycosyl hydrolase, putative, expressed
LOC_Os06g28194.1	6599	5.17e-06	0.000241419	2645	5.81e-05	0.00178089	0	0	34.3608	15.858	29.2472	57.4582	expressed protein
LOC_Os06g29844.1	14.0361	0.000673595	0.0131112	14.2526	0.000570066	0.0114666	4.73108	2.35242	60.3224	40.6361	25.8063	73.6183	MATE efflux family protein, putative, expressed
LOC_Os06g30130.1	7.12619	0.000293787	0.00684825	6.06951	0.000812712	0.0153546	177.415	204.66	1198.05	1120.96	1423.65	1299.09	cysteine-rich receptor-like protein kinase 10 precursor, putative, expressed
LOC_Os06g33450.1	65.0495	1.85e-06	0.000102184	38.3116	3.84e-05	0.00127051	2.36554	0	35.1244	55.503	94.6232	59.2538	helix-loop-helix DNA-binding domain containing protein, expressed
LOC_Os06g33710.1	10.5876	3.07e-05	0.00107814	18.5447	5.45e-07	3.79e-05	50.8591	32.9339	881.928	671.983	366.45	520.715	spermidine synthase, putative, expressed
LOC_Os06g33720.1	54.0399	2.62e-08	2.79e-06	28.102	2.31e-06	0.000127144	5.91384	0	90.8653	75.3255	144.515	175.068	flavin-containing monooxygenase family protein, putative, expressed
LOC_Os06g33940.1	6599	7.66e-06	0.000338772	2645	3.65e-06	0.000186028	0	0	49.6323	48.5651	30.1074	53.8671	NAC domain containing protein, putative, expressed
LOC_Os06g35940.1	13.2997	2.8e-05	0.000999418	10.5783	0.000116239	0.00317819	14.1932	7.05725	123.699	101.095	147.956	134.668	osFTL12 FT-Like12 homologous to Flowering Locus T gene; contains Pfam profile PF01161: Phosphatidylethanolamine-binding protein, expressed
LOC_Os06g36680.1	50.5553	7.58e-08	6.96e-06	26.4782	4.85e-06	0.000233996	5.91384	0	93.156	63.432	123.01	175.966	homeobox domain containing protein, expressed
LOC_Os06g36850.1	82.8761	7.29e-11	1.89e-08	107.878	9.73e-12	4.3e-09	13.0105	0	714.705	688.832	492.901	585.356	cysteine synthase, putative, expressed
LOC_Os06g38990.1	27.5954	8.96e-07	5.59e-05	25.7469	1.61e-06	9.5e-05	2.36554	10.5859	138.207	195.252	162.58	194.819	receptor-like protein kinase 2 precursor, putative, expressed
LOC_Os06g39110.1	770.338	1.09e-15	1.55e-12	86.5334	2.1e-08	2.45e-06	2.36554	0	94.6832	110.015	1238.7	583.56	expressed protein
LOC_Os06g39120.1	605.948	7.3e-15	9.18e-12	165.752	1.67e-10	4.23e-08	2.36554	0	190.894	201.198	748.384	685.01	expressed protein
LOC_Os06g40640.1	5.74126	0.000963064	0.0174832	5.54165	0.00115141	0.0201241	2792.52	1959.56	14839.3	11495.1	14198.6	13084.3	fructose-bisphospate aldolase isozyme, putative, expressed
LOC_Os06g40640.2	5.16745	0.00210885	0.0326103	6.0523	0.000766943	0.0146594	253.113	178.784	1585.18	1028.79	1235.26	996.541	fructose-bisphospate aldolase isozyme, putative, expressed
LOC_Os06g40818.1	12.0186	9.45e-06	0.000403771	18.1785	4.34e-07	3.15e-05	55.5901	95.2729	1609.61	1132.86	871.394	941.776	aspartic proteinase, putative, expressed
LOC_Os06g40890.1	6599	0.0017135	0.027572	2645	0.00305846	0.043457	0	0	13.7443	19.8225	15.4838	25.138	polygalacturonase, putative, expressed
LOC_Os06g41020.1	5.59971	0.00152654	0.0251709	4.864	0.00361429	0.049255	105.266	90.5681	442.109	510.43	524.729	571.889	DUF1680 domain containing protein, putative, expressed
LOC_Os06g41700.1	6.90097	0.000952048	0.0173433	5.8361	0.00258005	0.0378328	21.2898	29.4052	131.335	164.527	150.537	199.308	expansin precursor, putative, expressed
LOC_Os06g41910.1	6.78495	0.000855396	0.0159071	5.94928	0.00178343	0.0283888	27.2037	24.7004	161.114	147.678	138.494	213.673	expressed protein
LOC_Os06g41930.1	12.2185	1.38e-05	0.00055778	11.6802	1.96e-05	0.00072839	47.3108	35.2863	500.905	463.847	634.836	374.376	zinc-binding protein, putative, expressed
LOC_Os06g42020.1	21.1428	3.86e-07	2.75e-05	22.1515	2.94e-07	2.28e-05	27.2037	16.4669	468.834	498.536	463.654	459.666	CSLA9 - cellulose synthase-like family A, expressed
LOC_Os06g42754.1	20.5569	0.000348342	0.00785115	15.9615	0.00110143	0.0194588	2.36554	2.35242	36.6516	38.6539	61.075	35.9114	expressed protein
LOC_Os06g43220.1	14.7735	7.41e-06	0.000329156	18.0272	2.13e-06	0.000119839	13.0105	21.1718	270.305	345.903	257.203	247.789	AP2 domain containing protein, expressed
LOC_Os06g43304.1	47.2284	1.18e-09	1.99e-07	30.5517	3.21e-08	3.5e-06	10.6449	14.1145	438.292	318.151	668.384	500.964	cytochrome P450, putative, expressed
LOC_Os06g44100.1	6599	3.8e-11	1.09e-08	2645	1.54e-10	3.96e-08	0	0	100.028	201.198	213.332	140.054	HLS, putative, expressed
LOC_Os06g44180.1	5.90562	0.00167163	0.0270833	6.12364	0.00133074	0.0225701	16.5588	54.1056	237.472	195.252	209.031	208.286	NAD dependent epimerase/dehydratase family protein, putative, expressed
LOC_Os06g44750.1	6599	3.68e-05	0.00125048	2645	5.86e-08	5.85e-06	0	0	95.4468	93.1658	23.2257	30.5247	AP2 domain containing protein, expressed
LOC_Os06g44860.1	126.48	3.18e-09	4.62e-07	129.33	3.06e-09	4.76e-07	2.36554	0	137.443	168.491	159.139	140.054	OsSPL10 - SBP-box gene family member, expressed
LOC_Os06g44930.1	31.0501	7.81e-06	0.000344744	17.6494	0.000209784	0.00514089	1.18277	3.52863	33.5973	49.5563	62.7954	83.494	expressed protein
LOC_Os06g44970.1	53.1392	0.000150589	0.00390276	56.9387	0.000131793	0.00352015	0	1.17621	21.3801	45.5918	28.387	34.1158	auxin efflux carrier component, putative, expressed
LOC_Os06g45640.1	9.82337	0.0001406	0.00368511	11.9001	4.28e-05	0.00139391	18.9243	11.7621	184.785	180.385	128.171	173.272	core histone H2A/H2B/H3/H4, putative, expressed
LOC_Os06g45940.1	18.6689	4.05e-06	0.00019992	12.0115	6.5e-05	0.00194722	14.1932	5.88104	132.098	109.024	114.408	260.358	potassium transporter, putative, expressed
LOC_Os06g46436.1	10.1222	0.000112271	0.00312105	8.27652	0.000361359	0.00806847	30.752	15.2907	214.564	166.509	244.3	221.753	photosystem I iron-sulfur center, putative, expressed
LOC_Os06g46754.1	202.463	1.04e-12	4.87e-10	147.631	1.38e-11	5.69e-09	4.73108	0	306.957	391.495	350.966	606.902	RIC10, putative, expressed
LOC_Os06g46799.1	5.27584	0.00173205	0.0278295	5.35603	0.00145797	0.024262	416.335	424.611	2635.86	1868.27	1771.17	2665.52	peroxidase precursor, putative, expressed
LOC_Os06g46910.1	31.1778	4.79e-07	3.34e-05	28.2113	9.49e-07	6.14e-05	8.27938	2.35242	154.242	145.695	159.999	171.477	ZOS6-07 - C2H2 zinc finger protein, expressed
LOC_Os06g46920.1	11.598	0.000100273	0.00286453	11.2484	0.000135263	0.00359521	10.6449	15.2907	125.226	166.509	163.44	137.361	dihydroflavonol-4-reductase, putative, expressed
LOC_Os06g46990.1	5.17054	0.00224079	0.0342843	9.7759	3.83e-05	0.00127051	158.491	104.683	1460.72	1112.04	541.073	819.677	expressed protein
LOC_Os06g48250.1	384.858	3.92e-13	2.13e-10	89.3488	1.97e-08	2.35e-06	2.36554	0	112.245	99.1125	553.976	356.42	ATPase, putative, expressed
LOC_Os06g49830.1	6599	3.26e-06	0.000165069	2645	4.07e-06	0.00020408	0	0	40.4694	53.5208	55.9137	40.4003	SHI, putative, expressed
LOC_Os06g50040.1	7.77774	0.000207866	0.00513793	5.75244	0.0013628	0.0230302	105.266	92.9205	571.153	568.906	843.867	697.579	OsSAUR29 - Auxin-responsive SAUR gene family member, expressed
LOC_Os06g50400.1	13.4423	5.58e-05	0.00175872	19.239	6.93e-06	0.000310642	4.73108	12.9383	139.734	200.207	111.827	125.69	expansin precursor, putative, expressed
LOC_Os06g50410.1	6599	7.63e-05	0.00227726	2645	0.000424253	0.00912954	0	0	18.3258	21.8048	30.9676	30.5247	DUF677 domain containing protein, putative, expressed
LOC_Os06g51110.1	11.7822	1.31e-05	0.000533139	21.4722	1.73e-07	1.44e-05	55.5901	54.1056	1169.03	1186.38	480.858	811.597	cyclin, putative, expressed
LOC_Os06g51310.1	18.1037	1.66e-06	9.38e-05	19.8968	9.84e-07	6.28e-05	14.1932	18.8193	270.305	386.539	252.902	344.749	PAZ domain containing protein, putative, expressed
LOC_Os07g01214.1	42.2531	9.84e-10	1.73e-07	26.43	3.53e-08	3.79e-06	44.9452	30.5814	1123.98	872.19	1242.14	1949.09	transposon protein, putative, unclassified, expressed
LOC_Os07g01340.1	6599	4.21e-11	1.16e-08	2645	1.26e-10	3.41e-08	0	0	161.878	139.749	73.1179	283.7	gibberellin 2-beta-dioxygenase 7, putative, expressed
LOC_Os07g01400.1	59.0219	0.000242158	0.00582978	49.1056	0.000503291	0.0103959	0	1.17621	29.0158	28.7426	34.4084	35.0136	peroxidase precursor, putative, expressed
LOC_Os07g01710.1	5.82844	0.00137782	0.0231271	6.04837	0.00118813	0.0206115	66.2351	76.4536	393.241	469.793	363.009	468.644	phytosulfokine receptor precursor, putative, expressed
LOC_Os07g02060.1	26.2019	5.17e-05	0.00165208	21.4781	0.000139627	0.00370215	2.36554	2.35242	55.7409	45.5918	67.9567	55.6626	WRKY29, expressed
LOC_Os07g02540.1	11.1917	0.000361242	0.00802022	10.3035	0.000547014	0.0111055	7.09661	8.23346	88.5746	69.3788	100.645	70.925	HLS, putative, expressed
LOC_Os07g03150.1	6.95644	0.000643322	0.0126046	5.76319	0.00218244	0.0333138	47.3108	27.0528	164.932	263.639	221.934	295.371	H-BTB5 - Bric-a-Brac, Tramtrack, Broad Complex BTB domain with H family conserved sequence, expressed
LOC_Os07g03250.1	36.2739	5.23e-08	5.06e-06	22.1142	1.64e-06	9.61e-05	8.27938	7.05725	175.622	163.536	233.117	323.202	AP2-like ethylene-responsive transcription factor PLETHORA 2, putative, expressed
LOC_Os07g03260.1	10.8707	0.00167235	0.0270833	18.779	0.000120326	0.00326187	0	7.05725	64.1402	68.3877	31.8278	44.8892	CSLC10 - cellulose synthase-like family C, expressed
LOC_Os07g03710.1	82.3018	2.38e-09	3.61e-07	55.1804	3.75e-08	4e-06	0	5.88104	174.858	149.66	182.365	301.656	SCP-like extracellular protein, expressed
LOC_Os07g03730.1	549.792	1.09e-17	3.34e-14	154.46	3.49e-13	3.08e-10	4.73108	7.05725	930.797	890.031	2979.77	3501.36	SCP-like extracellular protein, expressed
LOC_Os07g03770.1	6599	3.46e-13	2.02e-10	2645	5.49e-14	8.15e-11	0	0	348.953	388.521	253.762	318.714	Homeobox domain containing protein, expressed
LOC_Os07g04930.1	80.9305	2.75e-11	8.4e-09	58.3088	3.24e-10	7.24e-08	9.46215	11.7621	762.81	474.749	960.856	756.832	retrotransposon protein, putative, unclassified, expressed
LOC_Os07g04940.1	24.0327	2.74e-07	2.09e-05	16.5232	3.48e-06	0.000179214	13.0105	18.8193	313.829	212.101	348.385	416.572	uncharacterized PE-PGRS family protein PE_PGRS54 precursor, putative, expressed
LOC_Os07g04950.1	30.4161	2.97e-07	2.22e-05	38.0109	5.6e-08	5.68e-06	9.46215	2.35242	265.724	183.358	117.849	241.504	retrotransposon protein, putative, unclassified, expressed
LOC_Os07g04960.1	108.713	7.28e-09	9.4e-07	146.897	8.05e-10	1.56e-07	2.36554	0	190.894	156.598	73.1179	184.046	app1, putative, expressed
LOC_Os07g05024.1	81.3152	2.8e-07	2.11e-05	20.7544	0.000616728	0.0122468	0	2.35242	19.0894	29.7338	80.8598	110.427	expressed protein
LOC_Os07g05190.1	7.36054	0.000220869	0.00539883	8.32993	0.000103588	0.00287739	350.1	343.453	2720.61	3056.63	2114.4	2990.52	leucine-rich repeat family protein, putative, expressed
LOC_Os07g05360.1	9.19523	5.26e-05	0.00167308	60.3664	3e-11	1.01e-08	295.692	109.387	13043.4	11409.8	742.362	2982.44	photosystem II 10 kDa polypeptide, chloroplast precursor, putative, expressed
LOC_Os07g05420.1	449.503	7.03e-14	5.6e-11	181.137	7.19e-11	2.17e-08	0	2.35242	249.689	176.42	497.202	560.218	anthocyanidin 3-O-glucosyltransferase, putative, expressed
LOC_Os07g05460.1	14.7771	2.14e-05	0.000810911	7.87451	0.000996445	0.0180017	13.0105	3.52863	61.8495	68.3877	118.709	125.69	flavonol sulfotransferase, putative, expressed
LOC_Os07g06800.1	7.05783	0.000958752	0.0174266	8.92474	0.000240865	0.00573477	29.5692	23.5242	255.797	218.048	135.913	238.811	3-oxo-5-alpha-steroid 4-dehydrogenase, putative, expressed
LOC_Os07g07860.1	6599	0.000505178	0.0103835	2645	0.000309165	0.00709725	0	0	14.5079	26.7604	12.043	23.3424	LTPL76 - Protease inhibitor/seed storage/LTP family protein precursor, expressed
LOC_Os07g07920.1	17.8515	7.3e-06	0.000325038	18.9137	5.08e-06	0.000242134	14.1932	1.17621	142.025	148.669	90.3222	184.046	LTPL100 - Protease inhibitor/seed storage/LTP family protein precursor, expressed
LOC_Os07g08000.1	98.778	9.95e-09	1.23e-06	188.326	8.48e-11	2.52e-08	2.36554	0	261.142	184.349	117.849	115.814	expressed protein
LOC_Os07g09280.1	61.699	3.6e-05	0.00123069	102.515	2.45e-06	0.000133313	1.18277	0	68.7217	52.5297	35.2687	37.707	expressed protein
LOC_Os07g09710.1	7.15444	0.00182205	0.0289481	16.766	1.51e-05	0.000584419	10.6449	9.40967	158.823	177.411	86.0211	57.4582	OsFBX220 - F-box domain containing protein, expressed
LOC_Os07g11739.1	57.7155	0.000175787	0.00446033	28.3447	0.00312569	0.0441434	0	1.17621	14.5079	18.8314	49.032	18.8535	cytochrome P450, putative, expressed
LOC_Os07g15320.1	6599	6.9e-05	0.00209279	2645	0.000172696	0.00439353	0	0	25.9615	27.7515	35.2687	32.3202	leaf senescence related protein, putative, expressed
LOC_Os07g15460.1	15.682	1.2e-06	6.97e-05	6.3841	0.000554177	0.0112144	166.77	237.594	1444.68	1136.82	3941.49	2399.78	metal transporter Nramp6, putative, expressed
LOC_Os07g18154.1	30.4046	9.31e-07	5.74e-05	25.6498	2.67e-06	0.000142252	8.27938	0	122.172	90.1924	115.268	136.463	aldehyde oxidase 4, putative, expressed
LOC_Os07g22580.1	7.3056	0.000352377	0.00789311	6.77413	0.000588639	0.0117966	48.4935	65.8677	360.407	414.29	316.558	518.919	rhoGAP domain containing protein, expressed
LOC_Os07g23120.1	5.84693	0.00339493	0.0475567	6.56473	0.00195412	0.0304114	5.91384	11.7621	49.6323	66.4054	38.7095	64.6405	expressed protein
LOC_Os07g23640.1	48.1321	3.56e-09	5.13e-07	157.329	3.45e-13	3.08e-10	4.73108	7.05725	757.465	1097.18	205.59	361.807	retrotransposon protein, putative, Ty3-gypsy subclass, expressed
LOC_Os07g23660.1	101.734	2.58e-07	1.99e-05	234.479	7.86e-10	1.53e-07	0	1.17621	122.172	153.624	35.2687	84.3917	retrotransposon protein, putative, unclassified, expressed
LOC_Os07g23770.1	6599	0.000439205	0.00932661	2645	0.000327467	0.00744598	0	0	20.6165	24.7781	17.2042	24.2402	expressed protein
LOC_Os07g23850.1	6599	2.08e-05	0.000791373	2645	0.000819807	0.0154529	0	0	22.1436	9.91125	45.5912	38.6047	glycosyl hydrolase, putative, expressed
LOC_Os07g28160.1	6599	5e-09	6.83e-07	2645	5.89e-08	5.86e-06	0	0	58.7952	49.5563	69.6771	85.2895	cytochrome P450 51, putative, expressed
LOC_Os07g29190.1	6.84677	0.000772324	0.0146072	10.2765	6.48e-05	0.00194075	37.8486	19.9956	290.158	304.276	141.075	254.971	expressed protein
LOC_Os07g30110.1	7.11583	0.000493125	0.0102063	7.75337	0.000315227	0.00722105	46.128	47.0484	332.918	389.512	318.278	344.749	expressed protein
LOC_Os07g30610.1	12.638	0.000120629	0.00327976	18.8755	1.04e-05	0.0004353	4.73108	10.5859	157.296	131.82	49.032	144.543	cytokinin-O-glucosyltransferase 2, putative, expressed
LOC_Os07g30620.1	9.74313	6.76e-05	0.00206149	6.25874	0.00112238	0.0197434	53.2246	21.1718	216.855	248.772	362.149	362.705	cytokinin-O-glucosyltransferase 2, putative, expressed
LOC_Os07g31470.1	6599	0.000375738	0.00828018	2645	0.00100449	0.0180885	0	0	17.5622	13.8758	17.2042	24.2402	MYB family transcription factor, putative, expressed
LOC_Os07g32170.1	24.9252	4.33e-05	0.00142124	11.7274	0.0018036	0.028628	0	5.88104	31.3065	37.6628	76.5588	70.0272	OsSPL13 - SBP-box gene family member, expressed
LOC_Os07g32390.1	8.14224	0.000129432	0.00346717	18.6268	3.96e-07	2.88e-05	115.911	116.445	2059.36	2268.69	754.405	1137.49	targeting protein-related, putative, expressed
LOC_Os07g33480.1	6599	3.02e-05	0.00106159	2645	9.06e-05	0.00257783	0	0	14.5079	32.7071	19.7849	37.707	cytochrome P450 domain containing protein, expressed
LOC_Os07g33910.2	9.83907	6.02e-05	0.00187112	6.75874	0.000712416	0.0137784	43.7625	44.6959	242.053	355.814	278.708	591.64	transporter family protein, putative, expressed
LOC_Os07g33954.1	9.12923	0.000167834	0.0042818	6.38416	0.0013928	0.0234643	31.9348	16.4669	150.424	158.58	140.214	301.656	transporter family protein, putative, expressed
LOC_Os07g34260.1	16.8552	0.00035789	0.00797832	53.474	3.74e-07	2.77e-05	2.36554	1.17621	106.137	83.2545	30.9676	28.7291	chalcone and stilbene synthases, putative, expressed
LOC_Os07g34320.1	6599	3.21e-07	2.37e-05	2645	0.00174297	0.0279234	0	0	12.9808	9.91125	52.4729	98.7563	nodulin, putative, expressed
LOC_Os07g34620.1	31.6789	7.02e-08	6.5e-06	13.5086	2.19e-05	0.000798459	20.1071	3.52863	192.421	126.864	390.536	358.216	expressed protein
LOC_Os07g38890.1	6599	2.36e-10	5.22e-08	2645	1.86e-08	2.24e-06	0	0	55.7409	91.1835	123.87	148.134	OsGH3.9 - Probable indole-3-acetic acid-amido synthetase, expressed
LOC_Os07g40020.1	13.0662	4.69e-05	0.00152071	14.2315	3.2e-05	0.0010958	7.09661	11.7621	113.773	154.616	154.838	91.574	GRAS family transcription factor domain containing protein, expressed
LOC_Os07g40690.1	15.8504	3.7e-06	0.000184879	10.1566	7.16e-05	0.00210299	11.8277	16.4669	166.459	120.917	194.408	254.073	NAD dependent epimerase/dehydratase family protein, putative, expressed
LOC_Os07g40850.1	6599	7.46e-10	1.37e-07	2645	2.58e-12	1.48e-09	0	0	266.487	209.127	90.3222	126.588	retrotransposon protein, putative, unclassified, expressed
LOC_Os07g40860.1	178.445	7.07e-11	1.85e-08	433.956	7.01e-14	9.16e-11	2.36554	0	523.048	503.492	140.214	281.904	retrotransposon protein, putative, unclassified, expressed
LOC_Os07g40870.1	52.3097	1.13e-08	1.34e-06	157.745	2.23e-12	1.32e-09	4.73108	2.35242	650.565	466.82	129.032	241.504	igA FC receptor precursor, putative, expressed
LOC_Os07g40890.1	86.7901	1.93e-10	4.39e-08	201.554	2.42e-13	2.39e-10	7.09661	0	800.989	629.365	204.73	411.185	igA FC receptor precursor, putative, expressed
LOC_Os07g40900.1	6599	1.12e-09	1.91e-07	2645	9.45e-06	0.000403146	0	0	20.6165	28.7426	61.9352	121.201	retrotransposon protein, putative, unclassified, expressed
LOC_Os07g40910.1	33.502	4.14e-06	0.00020308	113.148	9.53e-10	1.8e-07	3.54831	0	199.293	202.19	32.688	86.1873	expressed protein
LOC_Os07g41400.1	20.6138	2.02e-05	0.00077254	17.5357	5.93e-05	0.00181	2.36554	7.05725	64.1402	101.095	95.4834	98.7563	EGG APPARATUS-1, putative, expressed
LOC_Os07g41410.1	60.01	1.31e-09	2.2e-07	20.3293	3.37e-06	0.000174076	3.54831	11.7621	122.935	188.314	547.094	371.683	EGG APPARATUS-1, putative, expressed
LOC_Os07g44060.1	9.78479	0.000117692	0.00322768	9.67712	0.000127083	0.00341375	15.376	11.7621	129.808	132.811	86.8813	178.659	haloacid dehalogenase-like hydrolase family protein, putative, expressed
LOC_Os07g44260.1	6599	9.92e-08	8.79e-06	2645	1.87e-06	0.000107779	0	0	29.7794	41.6273	51.6127	60.1516	dirigent, putative, expressed
LOC_Os07g44360.1	10.0103	0.000381127	0.00837071	16.2655	2.51e-05	0.000899101	9.46215	7.05725	116.063	152.633	78.2792	87.0851	serine/threonine-protein kinase Haspin, putative, expressed
LOC_Os07g44370.1	6599	8.98e-07	5.59e-05	2645	1.15e-05	0.000469195	0	0	29.7794	21.8048	24.9461	55.6626	dirigent, putative, expressed
LOC_Os07g44380.1	537.079	8.4e-13	4.1e-10	175.812	3.62e-09	5.48e-07	0	1.17621	117.59	89.2013	315.697	316.02	dirigent, putative, expressed
LOC_Os07g44690.1	21.4588	9.38e-07	5.76e-05	24.1446	4.5e-07	3.22e-05	3.54831	21.1718	278.705	318.151	270.106	260.358	HSF-type DNA-binding domain containing protein, expressed
LOC_Os07g44780.1	6.85915	0.000410387	0.00884104	5.56796	0.00134366	0.0227656	126.556	97.6253	763.574	484.66	888.598	649.098	GDSL-like lipase/acylhydrolase, putative, expressed
LOC_Os07g44850.1	6599	0.000128643	0.00345307	2645	0.000980833	0.0177844	0	0	16.7986	11.8935	28.387	19.7513	gibberellin receptor GID1L2, putative, expressed
LOC_Os07g45080.1	116.287	2.98e-13	1.8e-10	48.5656	3.16e-10	7.17e-08	53.2246	10.5859	1823.41	1275.58	4478.26	2942.04	expressed protein
LOC_Os07g45180.1	6599	0.000813713	0.0153009	2645	0.000921721	0.0169246	0	0	11.4536	26.7604	6.02148	32.3202	transposon protein, putative, unclassified, expressed
LOC_Os07g45570.1	10.539	8.21e-05	0.00242684	7.57286	0.000601031	0.0119888	20.1071	29.4052	198.529	176.42	324.3	197.513	expressed protein
LOC_Os07g45760.1	24.6204	2.38e-05	0.000878359	20.1252	7.48e-05	0.00218152	2.36554	4.70484	67.9581	74.3344	104.946	69.1294	expressed protein
LOC_Os07g46060.1	13.8193	0.000103927	0.00294186	7.87309	0.00204157	0.0315767	9.46215	8.23346	67.9581	71.361	156.558	87.9829	expressed protein
LOC_Os07g46330.1	38.6715	5.73e-09	7.77e-07	43.8062	2.15e-09	3.52e-07	13.0105	17.6431	742.194	600.622	547.094	638.325	uncharacterized UPF0114 domain containing protein, expressed
LOC_Os07g46480.1	99.7871	5.72e-11	1.52e-08	89.8563	1.54e-10	3.96e-08	2.36554	4.70484	252.743	382.574	270.106	435.425	eukaryotic aspartyl protease domain containing protein, expressed
LOC_Os07g47090.1	6.59569	0.000696076	0.0134719	12.6771	1.06e-05	0.000443778	47.3108	48.2246	568.863	642.249	249.461	380.661	KIP1, putative, expressed
LOC_Os07g47140.1	33.3762	4.26e-08	4.24e-06	9.53751	0.000204039	0.00504172	10.6449	12.9383	109.955	114.971	272.687	514.431	CCT/B-box zinc finger protein, putative, expressed
LOC_Os07g47210.1	85.6426	2.65e-08	2.8e-06	185.585	8.23e-11	2.47e-08	2.36554	0	259.615	179.394	48.1718	154.419	GDSL-like lipase/acylhydrolase, putative, expressed
LOC_Os07g47990.2	7.10774	0.0017416	0.0279416	8.3383	0.000806251	0.015259	15.376	14.1145	116.063	129.837	113.548	96.0629	peroxidase precursor, putative, expressed
LOC_Os07g48030.1	227.934	3.79e-11	1.09e-08	196.199	1.18e-10	3.24e-08	2.36554	0	225.254	238.861	234.838	304.349	peroxidase precursor, putative, expressed
LOC_Os07g48060.1	6599	1.22e-12	5.64e-10	2645	1.45e-11	5.69e-09	0	0	203.111	132.811	283.009	187.637	peroxidase precursor, putative, expressed
LOC_Os07g48460.1	6599	9.75e-15	1.1e-11	2645	7.88e-14	9.85e-11	0	0	337.5	282.471	436.987	371.683	stress responsive protein, putative, expressed
LOC_Os07g48560.1	57.2628	3.91e-08	3.95e-06	21.2737	2.02e-05	0.000746855	4.73108	2.35242	76.3574	74.3344	147.956	257.664	homeobox domain containing protein, expressed
LOC_Os07g48680.1	32.1848	2.43e-06	0.000127276	24.4979	1.25e-05	0.000499778	2.36554	4.70484	93.9196	79.29	154.838	72.7205	zinc finger, C3HC4 type domain containing protein, expressed
LOC_Os07g48980.1	52.3054	9.94e-10	1.74e-07	81.6321	2.81e-11	9.57e-09	7.09661	9.40967	776.555	570.888	397.417	465.95	nicotianamine synthase, putative, expressed
LOC_Os07g49140.1	21.6427	3.5e-07	2.54e-05	23.771	1.96e-07	1.6e-05	18.9243	18.8193	401.64	495.563	372.471	444.403	expressed protein
LOC_Os07g49370.1	6.92206	0.00040557	0.0087488	4.86668	0.00325598	0.0456089	106.449	79.9822	474.179	433.122	587.524	702.965	glycosyltransferase family 43 protein, putative, expressed
LOC_Os08g01150.1	39.9179	7.64e-07	4.93e-05	19.178	7.91e-05	0.00228467	2.36554	2.35242	38.9423	51.5385	86.8813	101.45	DTA2, putative, expressed
LOC_Os08g01490.1	6599	4.13e-05	0.00137365	2645	0.00345141	0.0476113	0	0	6.10859	12.8846	18.9246	31.4225	cytochrome P450, putative, expressed
LOC_Os08g01710.1	72.0749	4.16e-05	0.00138008	89.2868	1.46e-05	0.000569474	1.18277	0	58.0316	47.574	21.5053	63.7427	GLTP domain containing protein, putative, expressed
LOC_Os08g01780.1	7.88314	0.00127252	0.021842	8.33788	0.00103633	0.0185652	17.7415	2.35242	76.3574	91.1835	93.763	64.6405	OsIAA25 - Auxin-responsive Aux/IAA gene family member, expressed
LOC_Os08g01950.1	118.448	6.97e-09	9.11e-07	63.9638	4.17e-07	3.03e-05	2.36554	0	80.9389	70.3699	141.935	138.259	transferase family protein, putative, expressed
LOC_Os08g01970.1	6599	0.000506098	0.0103958	2645	0.00121478	0.0209514	0	0	19.0894	11.8935	22.3655	17.9557	retrotransposon protein, putative, unclassified, expressed
LOC_Os08g02094.1	6599	7.35e-07	4.76e-05	2645	3.79e-07	2.79e-05	0	0	56.5045	39.645	37.8493	49.3781	GDSL-like lipase/acylhydrolase, putative, expressed
LOC_Os08g02160.1	21.5504	3.1e-06	0.000158378	16.0457	2.03e-05	0.000746942	5.91384	8.23346	122.935	104.068	152.257	152.623	no apical meristem protein, putative, expressed
LOC_Os08g02220.1	30.2108	8.6e-07	5.47e-05	16.9068	3.56e-05	0.00119206	4.73108	4.70484	73.3031	86.2279	92.0426	193.024	endoglucanase, putative, expressed
LOC_Os08g02440.1	7.83817	0.000257525	0.00614769	5.82754	0.00152986	0.0252014	23.6554	69.3963	275.65	266.613	300.214	429.141	expressed protein
LOC_Os08g03560.1	6.98311	0.000678567	0.0132001	8.39215	0.000232123	0.00556721	21.2898	41.1673	246.634	277.515	147.956	288.189	chloroplast unusual positioning protein, putative, expressed
LOC_Os08g04560.1	53.2417	5.95e-09	8.01e-07	23.2363	1.98e-06	0.000113012	9.46215	2.35242	139.734	134.793	295.052	333.976	decarboxylase, putative, expressed
LOC_Os08g05520.1	41.912	5.77e-08	5.45e-06	19.8114	9.03e-06	0.000386912	4.73108	4.70484	97.7375	89.2013	174.623	220.855	myb-like DNA-binding domain containing protein, putative, expressed
LOC_Os08g08500.1	19.7316	1.86e-06	0.000102232	14.5052	1.46e-05	0.000569474	11.8277	16.4669	209.219	201.198	249.461	308.838	reductase, putative, expressed
LOC_Os08g08970.1	44.5591	3.26e-10	6.87e-08	46.8815	2.01e-10	4.94e-08	209.35	169.374	10638.9	7116.28	9147.48	7728.13	Cupin domain containing protein, expressed
LOC_Os08g08980.1	22.2268	1.61e-07	1.32e-05	90.798	2.19e-12	1.32e-09	27.2037	19.9956	2467.87	1817.72	441.288	607.8	cupin domain containing protein, expressed
LOC_Os08g09060.1	6599	0.000183883	0.00462981	2645	0.00067634	0.0132295	0	0	13.7443	13.8758	15.4838	21.5468	Cupin domain containing protein, expressed
LOC_Os08g09950.1	132.125	1.02e-07	8.94e-06	66.4306	8.73e-06	0.000376141	1.18277	0	29.0158	49.5563	80.8598	75.4139	acyl-desaturase, chloroplast precursor, putative, expressed
LOC_Os08g10150.1	48.2417	1.73e-05	0.000677408	53.0845	1.23e-05	0.000493824	0	2.35242	46.578	78.2989	53.3331	60.1516	SHR5-receptor-like kinase, putative, expressed
LOC_Os08g10260.1	29.9221	4.1e-07	2.9e-05	19.1348	7.03e-06	0.000314497	14.1932	0	159.587	111.997	184.085	240.606	NBS-LRR disease resistance protein, putative, expressed
LOC_Os08g10310.1	6599	6.72e-11	1.77e-08	2645	7.26e-08	6.96e-06	0	0	53.4502	74.3344	153.978	211.877	SHR5-receptor-like kinase, putative, expressed
LOC_Os08g10320.1	7.48915	0.000225118	0.00547641	7.73297	0.000185422	0.00465564	183.329	139.969	1278.99	1221.07	1091.61	1329.62	SHR5-receptor-like kinase, putative, expressed
LOC_Os08g13440.1	6599	4.23e-07	2.98e-05	2645	3.16e-05	0.00108457	0	0	25.9615	34.6894	43.0106	102.347	cupin domain containing protein, expressed
LOC_Os08g15020.1	6599	7.94e-10	1.44e-07	2645	3.9e-08	4.1e-06	0	0	77.121	57.4853	123.87	122.099	MYB family transcription factor, putative, expressed
LOC_Os08g15420.1	6599	1.09e-09	1.87e-07	2645	1.59e-09	2.79e-07	0	0	75.5938	155.607	114.408	121.201	CSLC3 - cellulose synthase-like family C, expressed
LOC_Os08g17820.1	7.51532	0.0013116	0.0223251	9.44147	0.000411834	0.00892106	10.6449	11.7621	91.6289	119.926	70.5373	97.8585	retrotransposon protein, putative, unclassified, expressed
LOC_Os08g17990.1	78.7442	1.96e-05	0.000754019	55.4002	0.000121003	0.00327208	1.18277	0	22.9072	42.6184	46.4514	46.6848	retrotransposon protein, putative, unclassified, expressed
LOC_Os08g24790.1	40.4171	4.88e-07	3.38e-05	90.268	1.51e-09	2.67e-07	4.73108	0	276.414	150.651	61.9352	129.281	AIR12, putative, expressed
LOC_Os08g25030.1	29.8199	2.83e-05	0.00100754	12.2764	0.00212388	0.0326181	0	4.70484	29.0158	28.7426	97.2038	43.0937	plant protein of unknown function domain containing protein, expressed
LOC_Os08g26220.1	6599	0.000391509	0.00854474	2645	0.000214516	0.00524112	0	0	18.3258	36.6716	18.0644	26.9335	expressed protein
LOC_Os08g28570.1	6599	4.37e-05	0.00143413	2645	0.00184301	0.0290699	0	0	15.2715	12.8846	38.7095	40.4003	resistance protein, putative, expressed
LOC_Os08g30770.1	13.3385	4.05e-06	0.00019992	6.04013	0.000815942	0.0154067	196.34	144.674	1130.09	929.676	3279.12	1269.47	ABC transporter, ATP-binding protein, putative, expressed
LOC_Os08g32160.1	7.00907	0.000390508	0.00853088	9.35616	5.58e-05	0.00172522	59.1384	88.2157	804.807	573.862	443.869	588.947	oxidoreductase, 2OG-FeII oxygenase domain containing protein, putative, expressed
LOC_Os08g32600.1	6.37738	0.000841637	0.0156995	10.5117	3.58e-05	0.00119746	36.6658	64.6915	532.211	533.226	246.881	399.514	STE_MEKK_ste11_MAP3K.21 - STE kinases include homologs to sterile 7, sterile 11 and sterile 20 from yeast, expressed
LOC_Os08g32680.1	6599	8.43e-06	0.0003677	2645	0.000105912	0.00293694	0	0	26.7251	24.7781	41.2901	51.1737	retrotransposon protein, putative, Ty3-gypsy subclass, expressed
LOC_Os08g32750.1	6599	3.77e-07	2.71e-05	2645	0.000181586	0.00457691	0	0	18.3258	23.787	49.8922	105.939	bifunctional monodehydroascorbate reductase and carbonic anhydrasenectarin-3 precursor, putative, expressed
LOC_Os08g33660.1	9.43249	5.11e-05	0.00163576	6.39287	0.000690193	0.0134281	136.018	97.6253	665.073	828.581	1135.48	1068.36	MYB family transcription factor, putative, expressed
LOC_Os08g35190.1	24.5049	3.25e-06	0.000164932	14.0836	0.000119254	0.00324089	0	8.23346	46.578	69.3788	87.7415	114.019	auxin-repressed protein, putative, expressed
LOC_Os08g35190.2	6599	0.00023988	0.00578561	2645	0.00354768	0.0485557	0	0	9.92646	10.9024	11.1827	31.4225	auxin-repressed protein, putative, expressed
LOC_Os08g35520.1	6.22672	0.0021887	0.0335344	5.91713	0.00292464	0.0419571	23.6554	24.7004	147.37	138.758	177.203	123.894	retrotransposon protein, putative, unclassified, expressed
LOC_Os08g35750.1	228.582	3.76e-10	7.82e-08	300.088	4.95e-11	1.6e-08	1.18277	0	172.568	182.367	120.43	149.93	Cupin domain containing protein, expressed
LOC_Os08g35760.1	165.663	1.22e-14	1.29e-11	118.581	2.13e-13	2.17e-10	43.7625	31.7576	3962.95	4992.3	4618.47	7892.42	Cupin domain containing protein, expressed
LOC_Os08g36030.1	6599	3.51e-05	0.00120338	2645	0.000184181	0.00462805	0	0	22.9072	29.7338	30.9676	48.4804	plant viral response family protein, putative, expressed
LOC_Os08g36040.1	37.0155	5.96e-05	0.00185514	27.2811	0.000307484	0.0070735	2.36554	0	22.9072	41.6273	50.7525	36.8092	plant viral response family protein, putative, expressed
LOC_Os08g36110.1	18.7846	1.13e-05	0.000467297	9.96956	0.000477596	0.00998794	2.36554	11.7621	69.4852	71.361	131.612	133.77	ZOS8-06 - C2H2 zinc finger protein, expressed
LOC_Os08g36320.1	7.80155	0.000172275	0.00438482	5.76339	0.00111789	0.0196857	193.974	154.083	1064.42	941.569	1160.42	1554.96	decarboxylase, putative, expressed
LOC_Os08g36320.2	7.2975	0.000904461	0.0166622	7.50228	0.000715165	0.0138234	14.1932	27.0528	185.548	123.891	138.494	162.499	decarboxylase, putative, expressed
LOC_Os08g36480.1	7.41043	0.000201552	0.00500526	5.20736	0.00172727	0.0277127	677.727	606.924	3826.27	2863.36	5206.86	4312.96	nitrate reductase, putative, expressed
LOC_Os08g36540.1	25.2621	4.41e-06	0.000214323	15.3492	9.63e-05	0.00271107	4.73108	2.35242	54.2138	54.5119	75.6986	103.245	aspartic proteinase nepenthesin-1 precursor, putative, expressed
LOC_Os08g36970.1	22.8416	2.33e-06	0.000123027	9.78698	0.000410725	0.00890294	9.46215	7.05725	79.4117	82.2634	199.569	177.761	expressed protein
LOC_Os08g37250.1	6599	8.01e-13	3.99e-10	2645	2.27e-12	1.32e-09	0	0	270.305	206.154	309.676	241.504	patatin, putative, expressed
LOC_Os08g37290.1	16.4951	0.000117726	0.00322768	8.7689	0.00278015	0.0402912	3.54831	7.05725	40.4694	52.5297	85.1609	89.7785	basic helix-loop-helix, putative, expressed
LOC_Os08g37300.1	59.5001	1.47e-10	3.45e-08	119.754	5.13e-13	4.02e-10	11.8277	17.6431	1939.48	1589.77	613.33	1140.19	expressed protein
LOC_Os08g37840.1	5.08878	0.00271799	0.039947	5.52486	0.00179981	0.0285817	83.9766	96.4491	486.397	510.43	520.428	397.719	phosphate-induced protein 1 conserved region domain containing protein, expressed
LOC_Os08g37970.1	7.13185	0.000729637	0.0139981	5.42799	0.00305178	0.043381	30.752	32.9339	206.929	138.758	227.956	226.242	MYB family transcription factor, putative, expressed
LOC_Os08g38170.1	79.7778	1.52e-11	4.92e-09	54.3544	3.1e-10	7.08e-08	21.2898	7.05725	826.187	714.601	843.867	1417.6	methyladenine glycosylase, putative, expressed
LOC_Os08g38170.3	26.4996	9.39e-06	0.000401492	21.5709	3.05e-05	0.0010569	4.73108	1.17621	67.9581	59.4675	54.1933	102.347	methyladenine glycosylase, putative, expressed
LOC_Os08g38170.4	25.0904	0.000106792	0.00299833	23.3719	0.00016837	0.00430021	0	3.52863	35.888	46.5829	49.032	39.5025	methyladenine glycosylase, putative, expressed
LOC_Os08g38760.1	21.1883	0.00119937	0.0209049	39.2179	8.58e-05	0.00245353	2.36554	0	41.233	51.5385	24.0859	26.0358	expressed protein
LOC_Os08g38960.1	12.2718	0.000758417	0.0144104	10.643	0.00144645	0.0241317	5.91384	2.35242	47.3416	40.6361	41.2901	60.1516	expressed protein
LOC_Os08g39850.1	22.9364	7.78e-07	5e-05	7.5104	0.000866804	0.0161431	11.8277	10.5859	96.9739	71.361	233.977	280.109	lipoxygenase, chloroplast precursor, putative, expressed
LOC_Os08g40030.1	6599	6.78e-05	0.00206615	2645	1.07e-05	0.000447781	0	0	35.888	46.5829	15.4838	38.6047	CUP-SHAPED COTYLEDON3, putative, expressed
LOC_Os08g40170.1	5.58571	0.00131715	0.0223964	6.95761	0.000337737	0.00760863	223.543	243.475	1671.46	1577.87	953.114	1655.51	cyclin-dependent kinase B2-1, putative, expressed
LOC_Os08g40940.1	6599	0.000409688	0.0088318	2645	0.0016711	0.0270372	0	0	12.2172	11.8935	12.043	22.4446	expressed protein
LOC_Os08g41720.1	40.6862	3.02e-06	0.000154599	26.8436	3.32e-05	0.00112453	2.36554	2.35242	57.2681	69.3788	106.666	85.2895	auxin efflux carrier component, putative, expressed
LOC_Os08g41740.1	6599	7.94e-07	5.08e-05	2645	1.27e-05	0.000507585	0	0	25.9615	36.6716	25.8063	78.1073	cystathionin beta synthase protein, putative, expressed
LOC_Os08g42350.1	44.459	5.88e-10	1.15e-07	38.7778	1.98e-09	3.3e-07	48.4935	42.3435	1543.18	1979.28	1987.09	2051.44	nodulin MtN3 family protein, putative, expressed
LOC_Os08g42400.2	9.06985	0.000286776	0.0067232	6.07546	0.00282675	0.0408217	15.376	18.8193	97.7375	110.015	196.128	114.019	no apical meristem protein, putative, expressed
LOC_Os08g43410.1	27.994	1.08e-05	0.000449471	20.5141	6.2e-05	0.00187408	5.91384	0	61.8495	59.4675	73.9781	91.574	LRP1, putative, expressed
LOC_Os08g44270.1	347.74	2.92e-14	2.65e-11	636.176	2.12e-16	6.91e-13	0	3.52863	1147.65	1097.18	395.697	831.348	vignain precursor, putative, expressed
LOC_Os08g44750.1	17.0374	4.7e-06	0.000223808	23.8463	4.66e-07	3.32e-05	11.8277	14.1145	305.43	313.196	116.989	324.998	auxin-induced protein 5NG4, putative, expressed
LOC_Os09g02360.1	14.5365	8.44e-06	0.0003677	8.36911	0.000325309	0.00741065	26.0209	15.2907	143.552	202.19	269.246	331.282	cyclin, putative, expressed
LOC_Os09g03680.1	11.5135	0.000196467	0.00489014	14.1853	5.61e-05	0.00172933	14.1932	4.70484	158.06	110.015	95.4834	122.099	ankyrin, putative, expressed
LOC_Os09g03750.1	14.4839	0.00137025	0.0230119	19.1868	0.000466229	0.00978153	4.73108	0	31.3065	59.4675	34.4084	34.1158	ankyrin, putative, expressed
LOC_Os09g03939.1	6599	3.31e-12	1.39e-09	2645	3.03e-11	1.01e-08	0	0	163.405	132.811	156.558	242.402	white-brown complex homolog protein 11, putative, expressed
LOC_Os09g04050.1	32.3163	1.63e-08	1.86e-06	21.6248	3.01e-07	2.33e-05	18.9243	18.8193	477.234	338.965	480.858	738.877	dehydrogenase, putative, expressed
LOC_Os09g04710.1	8.89486	9.07e-05	0.00263073	7.70697	0.000230587	0.00553728	56.7729	59.9867	445.927	453.935	332.902	705.659	GDSL-like lipase/acylhydrolase, putative, expressed
LOC_Os09g10730.1	6599	8.28e-08	7.54e-06	2645	4.61e-06	0.000224422	0	0	29.7794	40.6361	52.4729	87.0851	expressed protein
LOC_Os09g10980.1	6599	2.91e-10	6.25e-08	2645	5.5e-09	7.92e-07	0	0	88.5746	93.1658	99.7845	181.352	ZOS9-02 - C2H2 zinc finger protein, expressed
LOC_Os09g11440.1	8.74416	0.000374153	0.00826907	15.5433	1.16e-05	0.000472922	10.6449	15.2907	177.149	225.977	90.3222	136.463	expressed protein
LOC_Os09g12240.1	5.31037	0.00324008	0.0457602	5.84794	0.00183237	0.0289318	55.5901	22.348	256.561	199.216	184.945	228.935	serine/threonine-protein kinase BRI1-like 1 precursor, putative, expressed
LOC_Os09g13650.1	6599	1.8e-08	2.03e-06	2645	0.000301897	0.00696946	0	0	7.63574	21.8048	26.6665	118.508	microtubule-associated protein, putative, expressed
LOC_Os09g13680.1	120.076	1.03e-06	6.15e-05	78.2435	1.11e-05	0.000459843	1.18277	0	41.9966	50.5474	78.2792	63.7427	ZOS9-04 - C2H2 zinc finger protein, expressed
LOC_Os09g15790.1	7.83454	0.000500102	0.0103116	6.10558	0.00209793	0.0322802	21.2898	32.9339	169.513	161.553	304.515	120.303	ras-related protein, putative, expressed
LOC_Os09g17810.1	64.5868	2.31e-06	0.000122569	33.3103	7.91e-05	0.00228467	0	2.35242	39.7059	38.6539	77.419	74.5161	leucine zipper protein-like, putative, expressed
LOC_Os09g19930.1	6.21721	0.000601639	0.0119382	4.93062	0.00256783	0.037752	1626.31	1215.02	6591.93	7417.58	8233.94	9431.23	HOTHEAD precursor, putative, expressed
LOC_Os09g20420.1	6599	4.42e-06	0.000214759	2645	0.000164689	0.00422936	0	0	15.2715	28.7426	43.8708	50.2759	expressed protein
LOC_Os09g23220.1	159.742	4.91e-11	1.34e-08	152.775	6.71e-11	2.05e-08	2.36554	1.17621	306.193	234.897	325.16	240.606	glycosyl hydrolases family 16, putative, expressed
LOC_Os09g25070.1	18.1368	1.07e-05	0.000446526	36.3149	1.19e-07	1.07e-05	4.73108	9.40967	275.65	237.87	191.827	64.6405	WRKY62, expressed
LOC_Os09g25150.1	389.229	1.55e-13	1.13e-10	210.609	1.99e-11	7.22e-09	2.36554	0	230.599	267.604	276.128	644.609	cinnamoyl-CoA reductase, putative, expressed
LOC_Os09g25290.1	14.3431	1.47e-05	0.0005889	7.19677	0.000947273	0.0173388	16.5588	14.1145	120.645	100.104	204.73	235.22	methyladenine glycosylase, putative, expressed
LOC_Os09g25490.1	6.939	0.000307875	0.00710067	5.61526	0.00108438	0.0192043	697.834	630.448	4262.27	3196.38	4124.71	5092.23	CESA9 - cellulose synthase, expressed
LOC_Os09g25890.1	6599	0.000199326	0.00495375	2645	0.00232438	0.0349417	0	0	14.5079	13.8758	30.9676	27.8313	trehalose-6-phosphate synthase, putative, expressed
LOC_Os09g26620.1	11.886	0.000155693	0.00401277	10.6543	0.000297326	0.00687851	7.09661	4.70484	60.3224	65.4143	36.1289	104.143	auxin-repressed protein, putative, expressed
LOC_Os09g27320.1	6599	1.1e-07	9.41e-06	2645	1.39e-05	0.000546839	0	0	28.2522	31.716	45.5912	98.7563	ZOS9-13 - C2H2 zinc finger protein, expressed
LOC_Os09g27510.1	44.523	7.72e-07	4.98e-05	23.9757	2.71e-05	0.000951912	2.36554	3.52863	77.8846	63.432	137.634	124.792	cytochrome P450, putative, expressed
LOC_Os09g28200.1	18.5303	6.02e-07	3.99e-05	13.0967	7.92e-06	0.000346473	50.8591	44.6959	576.498	674.956	919.566	851.1	HSF-type DNA-binding domain containing protein, expressed
LOC_Os09g28630.1	13.3806	0.000116044	0.00319686	10.8357	0.000414952	0.00896484	5.91384	2.35242	41.9966	47.574	36.9891	73.6183	gibberellin receptor, putative, expressed
LOC_Os09g29100.1	5.84821	0.000996008	0.0179738	5.17443	0.00220405	0.0335341	275.585	221.127	1186.59	1383.61	1446.87	1458	cyclin, putative, expressed
LOC_Os09g29239.3	12.9759	1.52e-05	0.000606771	6.64104	0.00094373	0.0172899	27.2037	30.5814	222.2	161.553	510.105	239.708	purine permease, putative, expressed
LOC_Os09g29284.1	12.923	0.00249467	0.0373641	21.357	0.000225462	0.00544342	2.36554	2.35242	80.9389	19.8225	22.3655	38.6047	MATE efflux family protein, putative, expressed
LOC_Os09g29390.1	728.211	8.46e-14	6.43e-11	218.151	8.91e-10	1.69e-07	1.18277	0	115.3	142.722	424.084	437.221	plastocyanin-like domain containing protein, putative, expressed
LOC_Os09g29710.1	63.4682	9.51e-11	2.35e-08	14.7292	5.22e-06	0.00024741	15.376	23.5242	312.302	260.666	1273.97	1194.95	beta-expansin precursor, putative, expressed
LOC_Os09g29820.1	8.68885	0.000600845	0.0119343	9.71425	0.000349508	0.0078306	7.09661	17.6431	111.482	128.846	114.408	100.552	bZIP transcription factor domain containing protein, expressed
LOC_Os09g30130.1	6.47841	0.00189624	0.0299231	10.4201	0.000131717	0.00352015	9.46215	11.7621	89.3382	131.82	58.4944	79.005	CSLE6 - cellulose synthase-like family E, expressed
LOC_Os09g30458.1	33.0266	9.15e-07	5.67e-05	27.4044	3.21e-06	0.000166209	7.09661	0	92.3925	102.086	101.505	132.872	subtilisin-like protease, putative, expressed
LOC_Os09g31498.1	14.508	5.18e-05	0.00165459	11.8953	0.000153213	0.00399111	8.27938	8.23346	119.118	77.3078	147.096	92.4718	dihydroflavonol-4-reductase, putative, expressed
LOC_Os09g32100.1	6599	5.16e-06	0.000241419	2645	4.66e-05	0.00148661	0	0	30.543	22.7959	27.5268	58.356	expressed protein
LOC_Os09g32260.1	6599	5.05e-07	3.48e-05	2645	1.13e-05	0.0004647	0	0	42.7601	26.7604	69.6771	61.0493	no apical meristem protein, putative, expressed
LOC_Os09g33490.1	122.783	3.06e-09	4.49e-07	75.4813	8.71e-08	8.25e-06	0	2.35242	99.2646	78.2989	129.032	159.806	no apical meristem protein, putative, expressed
LOC_Os09g33710.1	59.8421	1.66e-10	3.88e-08	47.0112	1.06e-09	1.98e-07	17.7415	10.5859	706.306	625.4	551.395	1143.78	Os9bglu33 - beta-glucosidase homologue, similar to G. max hydroxyisourate hydrolase, expressed
LOC_Os09g34214.1	27.7871	5.57e-06	0.000257172	15.9443	0.000184022	0.00462761	2.36554	2.35242	33.5973	41.6273	81.72	49.3781	UDP-glucoronosyl and UDP-glucosyl transferase domain containing protein, expressed
LOC_Os09g35800.1	11.1268	2.22e-05	0.000834863	5.54619	0.00175834	0.0280734	59.1384	70.5725	396.295	323.107	912.684	530.591	UDP-glucose 4-epimerase, putative, expressed
LOC_Os09g36280.1	12.3384	5.25e-05	0.00167001	13.4277	3.16e-05	0.00108458	8.27938	15.2907	161.878	154.616	145.376	145.441	glycosyl hydrolases family 17, putative, expressed
LOC_Os09g36740.1	16.2807	1.72e-06	9.66e-05	23.2808	1.28e-07	1.13e-05	34.3003	32.9339	777.318	787.945	426.665	667.952	tetratricopeptide repeat domain containing protein, expressed
LOC_Os09g37050.1	10.8224	0.000103668	0.00294012	8.5662	0.000408261	0.00888492	9.46215	16.4669	116.063	106.05	91.1824	189.433	RING-H2 finger protein ATL2B, putative, expressed
LOC_Os09g37600.1	8.21126	0.000106915	0.00299923	8.36299	0.000102767	0.00286432	316.982	376.387	2648.84	3149.8	2596.98	3096.46	lysM domain-containing GPI-anchored protein precursor, putative, expressed
LOC_Os09g37650.1	63.5227	6.94e-10	1.28e-07	46.099	8.13e-09	1.08e-06	8.27938	4.70484	296.267	302.293	437.847	386.945	flavin-containing monooxygenase family protein, putative, expressed
LOC_Os09g38710.1	5.171	0.00229455	0.0349107	8.01662	0.000162185	0.00417566	131.287	85.8633	856.73	884.084	478.277	644.609	HEAT repeat family protein, putative, expressed
LOC_Os09g39060.1	6599	1.58e-07	1.3e-05	2645	3.47e-06	0.000178947	0	0	48.1052	38.6539	117.849	38.6047	vignain precursor, putative, expressed
LOC_Os09g39070.1	55.0134	8.02e-11	2.02e-08	37.926	1.44e-09	2.56e-07	139.567	24.7004	3639.19	2590.8	4403.42	4633.47	thiol protease SEN102 precursor, putative, expressed
LOC_Os09g39110.1	6599	2.83e-13	1.74e-10	2645	8.68e-10	1.66e-07	0	0	103.846	116.953	435.267	237.913	vignain precursor, putative, expressed
LOC_Os09g39120.1	95.4646	2.67e-05	0.000960981	32.5579	0.0022036	0.0335341	0	1.17621	14.5079	23.787	60.2148	52.0715	thiol protease SEN102 precursor, putative, expressed
LOC_Os09g39160.1	6599	0.00123174	0.0213175	2645	5.34e-05	0.00166321	0	0	3.0543	79.29	8.60211	23.3424	thiol protease SEN102 precursor, putative, expressed
LOC_Os10g01470.1	6.52118	0.00167922	0.0271811	6.71253	0.00143093	0.0239338	14.1932	25.8766	145.079	123.891	142.795	118.508	homeobox associated leucine zipper, putative, expressed
LOC_Os10g02070.1	6599	1.12e-17	3.34e-14	2645	2.65e-13	2.54e-10	0	0	248.925	301.302	1174.19	772.992	peroxidase precursor, putative, expressed
LOC_Os10g02300.1	8.69179	0.000140725	0.00368511	5.36025	0.0024951	0.0369973	68.6006	44.6959	326.81	280.489	619.352	365.398	uncharacterized Cys-rich domain containing protein, putative, expressed
LOC_Os10g05750.1	183.973	3.86e-13	2.13e-10	176.976	5.43e-13	4.03e-10	2.36554	4.70484	616.968	634.32	475.697	825.064	POEI3 - Pollen Ole e I allergen and extensin family protein precursor, expressed
LOC_Os10g05780.1	11.6625	0.000290636	0.00678932	9.6764	0.000821618	0.0154692	2.36554	7.05725	46.578	44.6006	53.3331	56.5604	POT domain containing peptide transporter, putative, expressed
LOC_Os10g05950.1	5.54772	0.0012304	0.0213094	6.39895	0.000558028	0.0112661	1159.11	778.65	5422.14	6977.52	4293.31	6456.87	POEI11 - Pollen Ole e I allergen and extensin family protein precursor, expressed
LOC_Os10g05980.1	5.12429	0.00200094	0.0312435	5.72272	0.00101434	0.0182358	2179.84	1345.58	10134.9	10040.1	4622.77	13442.5	POEI13 - Pollen Ole e I allergen and extensin family protein precursor, expressed
LOC_Os10g07556.1	17.6388	6.82e-07	4.45e-05	16.8554	9.33e-07	6.06e-05	111.18	42.3435	1360.69	1227.01	1001.29	1706.69	wall-associated receptor kinase-like 22 precursor, putative, expressed
LOC_Os10g08026.1	65.1934	3.03e-08	3.15e-06	16.8259	0.000111287	0.00306518	3.54831	2.35242	62.6131	36.6716	257.203	127.485	lecithin:cholesterol acyltransferase, putative, expressed
LOC_Os10g08540.1	19.8536	6.1e-06	0.00027831	21.5805	3.95e-06	0.000199256	5.91384	7.05725	128.28	151.642	147.096	110.427	cytochrome P450, putative, expressed
LOC_Os10g09000.1	63.8252	2.63e-05	0.000950445	23.22	0.00326867	0.0457474	0	1.17621	11.4536	15.858	28.387	46.6848	expressed protein
LOC_Os10g10540.1	6599	0.000331357	0.00753066	2645	0.00168255	0.0271821	0	0	16.7986	16.8491	19.7849	35.9114	cysteine-rich repeat secretory protein precursor, putative, expressed
LOC_Os10g10620.1	35.7198	5.37e-07	3.66e-05	101.557	2.31e-10	5.5e-08	4.73108	0	253.507	226.968	77.419	91.574	invertase/pectin methylesterase inhibitor family protein, putative, expressed
LOC_Os10g13694.1	49.2062	2.28e-07	1.78e-05	11.6748	0.000892071	0.0164915	4.73108	2.35242	35.1244	47.574	262.364	86.1873	expressed protein
LOC_Os10g13700.2	47.2499	1.9e-10	4.37e-08	12.0696	7.16e-06	0.000318332	387.948	406.968	5021.26	4573.05	27459.7	10100.1	phosphoenolpyruvate carboxykinase, putative, expressed
LOC_Os10g13914.1	64.894	1.08e-06	6.41e-05	23.0293	0.000330421	0.00747994	2.36554	0	26.7251	27.7515	61.9352	91.574	POEI27 - Pollen Ole e I allergen and extensin family protein precursor, expressed
LOC_Os10g14870.1	10.2511	0.000618084	0.0121905	12.5241	0.000226521	0.00545688	3.54831	8.23346	70.2488	77.3078	71.3975	49.3781	heavy metal-associated domain containing protein, expressed
LOC_Os10g14920.1	37.4147	2.22e-09	3.41e-07	33.1776	5.55e-09	7.94e-07	47.3108	49.4008	1744.77	1463.89	1615.48	2002.96	integral membrane protein DUF6 containing protein, expressed
LOC_Os10g14920.3	6599	1.06e-08	1.3e-06	2645	3.07e-10	7.08e-08	0	0	144.315	143.713	73.9781	93.3696	integral membrane protein DUF6 containing protein, expressed
LOC_Os10g17650.1	5.7757	0.00289406	0.0418685	6.77402	0.00126055	0.0216604	31.9348	15.2907	150.424	169.482	86.0211	186.739	Os10bglu34 - beta-glucosidase homologue, similar to Os3bglu6, expressed
LOC_Os10g18480.1	13.8542	0.000223927	0.005456	11.5876	0.000522733	0.010699	3.54831	8.23346	83.9931	52.5297	106.666	56.5604	glucosyltransferase, putative, expressed
LOC_Os10g20450.1	6599	0.000545485	0.0110502	2645	2.24e-05	0.00081439	0	0	25.9615	38.6539	12.043	18.8535	MATE efflux family protein, putative, expressed
LOC_Os10g20650.1	37.9291	3.4e-09	4.91e-07	21.4132	2.8e-07	2.2e-05	29.5692	28.229	569.626	668.019	1010.75	1181.48	glucan endo-1,3-beta-glucosidase-related, putative, expressed
LOC_Os10g20890.1	6599	1.51e-06	8.54e-05	2645	8.67e-06	0.000374761	0	0	38.9423	26.7604	26.6665	66.4361	LTPL137 - Protease inhibitor/seed storage/LTP family protein precursor, expressed
LOC_Os10g21090.1	6599	9.64e-06	0.000410688	2645	2e-05	0.000740848	0	0	25.9615	47.574	41.2901	42.1959	ATP binding protein, putative, expressed
LOC_Os10g23050.1	15.2741	1.65e-05	0.00065054	28.0786	3.29e-07	2.49e-05	5.91384	15.2907	270.305	325.089	169.462	154.419	helix-loop-helix DNA-binding protein, putative, expressed
LOC_Os10g25010.1	36.2108	8.77e-08	7.91e-06	47.864	1.11e-08	1.42e-06	2.36554	8.23346	303.139	204.172	215.913	167.886	OsCML8 - Calmodulin-related calcium sensor protein, expressed
LOC_Os10g26340.1	75.7253	1.91e-10	4.37e-08	38.3466	3.32e-08	3.59e-06	7.09661	7.05725	247.398	295.355	578.922	492.884	cytochrome P450, putative, expressed
LOC_Os10g26670.1	6599	1.21e-08	1.42e-06	2645	4.35e-06	0.000214592	0	0	45.0509	25.7693	73.9781	129.281	expressed protein
LOC_Os10g26940.1	8.11941	0.000103729	0.00294012	7.12735	0.000241079	0.00573568	3206.49	1018.6	16452	13661.7	18067.9	16237.3	BURP domain containing protein, expressed
LOC_Os10g27170.1	11.6619	8.96e-05	0.00260136	6.15799	0.00302458	0.0430881	10.6449	16.4669	91.6289	75.3255	160.859	155.317	calmodulin-binding protein, putative, expressed
LOC_Os10g28120.1	40.3227	2.45e-09	3.68e-07	31.7291	1.41e-08	1.77e-06	23.6554	12.9383	710.124	450.962	728.599	746.957	glycosyl hydrolase, putative, expressed
LOC_Os10g28680.1	30.1531	1.07e-07	9.24e-06	22.3922	8.35e-07	5.49e-05	10.6449	9.40967	255.797	193.269	317.418	287.291	DUF581 domain containing protein, expressed
LOC_Os10g28700.1	7.40961	0.000759375	0.0144202	6.87108	0.00115797	0.0201848	20.1071	25.8766	160.351	155.607	133.333	207.388	expressed protein
LOC_Os10g31040.1	673.032	1.52e-16	2.76e-13	252.83	4.28e-13	3.58e-10	2.36554	1.17621	457.381	438.077	1087.31	1296.4	Citrate transporter protein, putative, expressed
LOC_Os10g31040.2	6599	9.7e-07	5.91e-05	2645	0.00107244	0.0190788	0	0	11.4536	14.8669	50.7525	67.3338	Citrate transporter protein, putative, expressed
LOC_Os10g31540.1	6599	2.52e-05	0.000922648	2645	4.04e-09	6.01e-07	0	0	94.6832	138.758	16.344	34.1158	glycine-rich cell wall structural protein 2 precursor, putative, expressed
LOC_Os10g31620.1	6599	1.11e-05	0.000461232	2645	9.93e-06	0.000419823	0	0	23.6708	63.432	42.1503	38.6047	glycine-rich cell wall structural protein 2 precursor, putative, expressed
LOC_Os10g32110.1	7.67267	0.000272338	0.00645884	5.91971	0.00118933	0.0206213	83.9766	52.9294	503.195	307.249	636.556	413.879	exostosin family domain containing protein, expressed
LOC_Os10g32580.1	6599	3.01e-12	1.29e-09	2645	1.16e-10	3.24e-08	0	0	119.881	123.891	116.989	275.62	GDSL-like lipase/acylhydrolase, putative, expressed
LOC_Os10g33170.1	16.8305	1.13e-06	6.62e-05	13.5644	5.62e-06	0.000263047	43.7625	37.6387	525.339	578.817	554.836	815.188	POT domain containing peptide transporter, putative, expressed
LOC_Os10g33520.1	9.94055	3.15e-05	0.0010969	6.42275	0.000572703	0.0115126	156.125	229.361	1227.06	1248.82	1865.8	1966.15	alcohol oxidase, putative, expressed
LOC_Os10g33530.1	97.5901	4.68e-06	0.000223125	31.5394	0.00115515	0.0201572	1.18277	0	14.5079	22.7959	70.5373	44.8892	alcohol oxidase-related, putative, expressed
LOC_Os10g33540.1	19.3453	2.78e-07	2.1e-05	29.7364	1.21e-08	1.56e-06	115.911	89.3919	2651.89	3453.08	2120.42	1851.23	alcohol oxidase, putative, expressed
LOC_Os10g33550.1	21.4178	9.23e-07	5.71e-05	21.1648	1.17e-06	7.35e-05	8.27938	19.9956	263.433	335	420.643	184.944	alcohol oxidase-related, putative, expressed
LOC_Os10g33620.1	14.9202	3.38e-05	0.00116319	17.1445	1.68e-05	0.000642441	9.46215	9.40967	138.207	185.34	172.042	109.53	ubiquitin family protein, putative, expressed
LOC_Os10g33780.1	24.5202	2.97e-07	2.22e-05	16.0884	5.99e-06	0.000276288	13.0105	17.6431	227.545	265.622	386.235	365.398	DUF640 domain containing protein, putative, expressed
LOC_Os10g34040.1	56.3239	1.31e-07	1.1e-05	20.7421	4.57e-05	0.00146485	2.36554	3.52863	78.6481	43.6095	251.182	80.8006	nodulin, putative, expressed
LOC_Os10g34050.1	6599	0.00210262	0.0325358	2645	0.000541313	0.0110114	0	0	17.5622	21.8048	13.7634	12.569	expressed protein
LOC_Os10g34480.1	6.89633	0.000344667	0.00778454	5.57508	0.0012779	0.0218841	223.543	239.947	1379.78	1204.22	1720.42	1475.96	cytochrome P450, putative, expressed
LOC_Os10g34700.1	6599	0.00233894	0.035487	2645	0.00342832	0.0473729	0	0	15.2715	17.8403	24.9461	12.569	expressed protein
LOC_Os10g35070.1	13.7015	9.79e-06	0.000416494	35.5179	9.16e-09	1.21e-06	34.3003	3.52863	809.389	534.217	239.999	278.313	alpha-galactosidase precursor, putative, expressed
LOC_Os10g35580.1	6.65152	0.000502075	0.0103392	10.3708	2.8e-05	0.000978021	95.8043	124.678	1123.98	1162.59	523.869	942.674	ATEB1A-like microtubule associated protein, putative, expressed
LOC_Os10g35950.1	93.0486	5.22e-11	1.41e-08	33.5851	1.05e-07	9.62e-06	3.54831	5.88104	187.839	128.846	240.859	636.529	transferase family protein, putative, expressed
LOC_Os10g36100.1	61.4761	2.3e-08	2.49e-06	30.286	2.6e-06	0.000139472	3.54831	1.17621	88.5746	54.5119	133.333	157.112	LTPL157 - Protease inhibitor/seed storage/LTP family protein precursor, expressed
LOC_Os10g36160.1	6.56192	0.00133193	0.0225187	7.03622	0.00100044	0.0180455	16.5588	21.1718	106.9	158.58	86.8813	160.703	LTPL159 - Protease inhibitor/seed storage/LTP family protein precursor, expressed
LOC_Os10g36180.1	5.67655	0.00341048	0.0477319	6.74562	0.00126863	0.0217538	13.0105	10.5859	87.811	71.361	57.6341	76.3117	expressed protein
LOC_Os10g36848.1	6.12657	0.00134756	0.0227008	6.21058	0.00114558	0.0200437	40.2141	16.4669	212.274	139.749	168.601	178.659	cytochrome P450, putative, expressed
LOC_Os10g37290.1	15.3066	0.000603072	0.0119523	10.6155	0.00319918	0.0449868	0	7.05725	31.3065	43.6095	55.0535	52.9693	DEFL6 - Defensin and Defensin-like DEFL family, expressed
LOC_Os10g37660.1	10.6773	0.000289981	0.00678374	12.4141	0.000145669	0.00382203	7.09661	9.40967	83.9931	120.917	116.989	59.2538	trehalase precursor, putative, expressed
LOC_Os10g38140.1	89.5259	1.23e-10	2.96e-08	45.192	2.17e-08	2.51e-06	5.91384	2.35242	193.184	180.385	343.224	396.821	glutathione S-transferase, putative, expressed
LOC_Os10g38470.1	23.5118	3.05e-07	2.27e-05	15.8057	5.76e-06	0.000267861	22.4726	15.2907	242.053	354.823	514.406	373.478	glutathione S-transferase, putative, expressed
LOC_Os10g38580.1	19.4752	4.56e-07	3.19e-05	11.5243	1.88e-05	0.000704052	24.8381	30.5814	351.244	287.426	468.815	610.493	glutathione S-transferase, putative, expressed
LOC_Os10g38700.1	6599	1.26e-05	0.000513975	2645	5.72e-11	1.82e-08	0	0	167.986	109.024	7.7419	39.5025	glutathione S-transferase, putative, expressed
LOC_Os10g38710.1	6599	3.23e-07	2.37e-05	2645	2.14e-06	0.000120091	0	0	38.9423	34.6894	30.9676	70.925	glutathione S-transferase, putative, expressed
LOC_Os10g38730.1	24.8565	0.000867702	0.0160938	33.194	0.000253351	0.00597975	2.36554	0	45.8144	32.7071	30.9676	27.8313	glutathione S-transferase, putative, expressed
LOC_Os10g38780.1	23.6337	1.82e-05	0.000707696	18.052	8.36e-05	0.00240176	7.09661	0	65.6674	62.4409	86.0211	81.6984	glutathione S-transferase, putative, expressed
LOC_Os10g38860.1	43.0194	1.22e-08	1.43e-06	19.2951	3.55e-06	0.000181268	11.8277	4.70484	153.478	165.518	263.225	447.994	hydrolase, alpha/beta fold family domain containing protein, expressed
LOC_Os10g38870.1	15.3009	1.47e-05	0.000588992	12.0649	6.15e-05	0.00186201	20.1071	7.05725	184.021	143.713	185.806	229.833	heavy metal-associated domain containing protein, expressed
LOC_Os10g38920.1	17.0514	7.02e-05	0.00212031	10.3192	0.00106334	0.0189601	4.73108	2.35242	37.4151	35.6805	30.1074	90.6762	protein kinase domain containing protein, expressed
LOC_Os10g38960.1	60.5804	0.000130427	0.00348243	30.0988	0.00222217	0.0337468	0	1.17621	17.5622	17.8403	33.5482	37.707	lectin-like receptor kinase, putative, expressed
LOC_Os10g39030.1	12.7433	6.94e-06	0.00031263	6.67806	0.000462171	0.00974103	109.998	63.5153	714.705	444.024	1215.48	995.643	homeobox domain containing protein, expressed
LOC_Os10g39150.1	27.8021	6.95e-08	6.46e-06	55.586	3.21e-10	7.23e-08	22.4726	5.88104	960.576	615.489	389.676	398.616	expressed protein
LOC_Os10g39260.1	21.6297	4.39e-07	3.08e-05	8.71641	0.000196676	0.00489309	24.8381	27.0528	228.309	223.994	551.395	570.991	aspartic proteinase nepenthesin, putative, expressed
LOC_Os10g39270.1	6599	5.58e-07	3.78e-05	2645	5.31e-05	0.00165624	0	0	32.0701	21.8048	70.5373	71.8228	nucleoid DNA-binding, putative, expressed
LOC_Os10g39300.1	16.8365	3.81e-06	0.000189851	7.0918	0.000873801	0.0162364	22.4726	22.348	157.296	160.562	399.998	354.625	aspartic proteinase nepenthesin, putative, expressed
LOC_Os10g39430.1	17.9314	1.16e-06	6.77e-05	11.7607	1.9e-05	0.000709727	41.3969	18.8193	440.582	267.604	437.847	641.916	expressed protein
LOC_Os10g39710.1	31.9132	9.06e-07	5.63e-05	7.51705	0.00300769	0.04294	5.91384	4.70484	48.1052	31.716	196.128	142.748	strictosidine synthase, putative, expressed
LOC_Os10g39840.1	114.365	3.47e-12	1.44e-09	164.91	1.86e-13	2.1e-10	4.73108	7.05725	969.739	974.276	561.718	786.459	glycosyl hydrolases family 16, putative, expressed
LOC_Os10g39920.1	10.472	6.91e-05	0.00209536	12.6012	2.2e-05	0.000802049	21.2898	25.8766	287.104	307.249	222.795	271.131	expressed protein
LOC_Os10g40620.1	12.2917	1.74e-05	0.000678364	8.13448	0.00023528	0.00563052	24.8381	22.348	225.254	158.58	246.02	333.976	expressed protein
LOC_Os10g40934.1	6.93462	0.00111574	0.0196781	9.25635	0.000215158	0.00524505	22.4726	8.23346	150.424	133.802	140.214	72.7205	flavonol synthase/flavanone 3-hydroxylase, putative, expressed
LOC_Os10g40960.1	30.0629	2.96e-05	0.00104318	44.4596	3.17e-06	0.000164369	0	3.52863	85.5203	71.361	37.8493	68.2316	oxidoreductase, 2OG-Fe oxygenase family protein, putative, expressed
LOC_Os10g41040.1	7.55961	0.000223083	0.00544072	8.14787	0.000142808	0.00376648	121.825	85.8633	836.877	855.341	744.083	825.962	ternary complex factor MIP1, putative, expressed
LOC_Os10g41060.1	16.1887	1.86e-06	0.000102197	21.9442	1.96e-07	1.6e-05	26.0209	35.2863	743.721	601.613	483.439	509.044	expressed protein
LOC_Os10g42230.1	5.5455	0.00128717	0.0220241	5.88206	0.000978729	0.0177844	374.938	378.739	2005.91	2427.27	1986.23	2193.29	AT hook motif domain containing protein, expressed
LOC_Os10g42230.2	9.85016	0.000307123	0.00708834	9.13057	0.000516664	0.0106014	15.376	5.88104	87.0474	107.042	118.709	90.6762	AT hook motif domain containing protein, expressed
LOC_Os10g42490.1	11.5501	1.1e-05	0.000456941	7.94556	0.00014683	0.0038463	204.619	207.013	1596.63	1674.01	2164.29	2590.11	homeobox and START domains containing protein, putative, expressed
LOC_Os10g42490.2	25.1431	2.28e-05	0.000849647	19.6895	8.67e-05	0.00247774	2.36554	3.52863	59.5588	56.4942	60.2148	87.9829	homeobox and START domains containing protein, putative, expressed
LOC_Os10g42660.1	9.82685	4.92e-05	0.00158585	19.0447	4.95e-07	3.49e-05	41.3969	61.1629	905.599	1047.62	378.493	629.347	expressed protein
LOC_Os10g42670.1	19.8969	3.63e-07	2.62e-05	14.0977	4.06e-06	0.000203856	52.0418	37.6387	742.958	521.332	893.759	890.602	glycosyl hydrolases family 16, putative, expressed
LOC_Os10g42780.1	10.6756	3.46e-05	0.00118928	5.35565	0.00238777	0.0357302	68.6006	27.0528	266.487	245.799	381.934	639.223	lrgB-like family protein, expressed
LOC_Os11g01480.1	13.3594	0.000158526	0.00407459	7.3777	0.00318402	0.0448702	7.09661	4.70484	50.3959	36.6716	69.6771	87.9829	MYB family transcription factor, putative, expressed
LOC_Os11g01570.1	12.6233	6.64e-06	0.000301146	8.66188	8.98e-05	0.00255902	125.374	95.2729	956.758	954.454	1081.29	1704	PMR5, putative, expressed
LOC_Os11g01620.1	12.4026	1e-05	0.00042456	16.775	1.22e-06	7.58e-05	57.9557	39.9911	795.644	847.412	511.826	702.965	inactive receptor kinase At2g26730 precursor, putative, expressed
LOC_Os11g01730.1	41.7571	0.000176841	0.00448011	31.0102	0.000675728	0.0132255	0	1.17621	20.6165	15.858	6.02148	43.0937	laccase-23 precursor, putative, expressed
LOC_Os11g01830.1	12.5376	1.78e-05	0.000693605	9.99226	8.53e-05	0.0024427	36.6658	21.1718	265.724	312.205	396.557	328.589	staphylococcal nuclease homologue, putative, expressed
LOC_Os11g02300.1	11.7822	1.03e-05	0.000434862	6.11506	0.00075057	0.0143886	156.125	122.326	991.119	711.628	2193.54	1087.22	CPuORF36 - conserved peptide uORF-containing transcript, expressed
LOC_Os11g02360.1	8.76287	0.000112309	0.00312105	5.30813	0.00230568	0.0347084	63.8695	62.3391	352.771	317.16	434.407	671.543	expressed protein
LOC_Os11g02369.1	15.5055	1.13e-06	6.62e-05	7.82056	0.000144163	0.00379186	941.484	1396.16	8862.04	9419.66	13604.2	22642.1	LTPL7 - Protease inhibitor/seed storage/LTP family protein precursor, expressed
LOC_Os11g02400.1	7.74073	0.000144484	0.00377751	5.37826	0.00136263	0.0230302	2242.53	1960.74	12931.9	9674.38	15832.2	16704.2	LTPL8 - Protease inhibitor/seed storage/LTP family protein precursor, expressed
LOC_Os11g02400.2	15.6843	0.000614695	0.0121383	13.2401	0.00125839	0.0216351	4.73108	1.17621	43.5237	34.6894	36.9891	55.6626	LTPL8 - Protease inhibitor/seed storage/LTP family protein precursor, expressed
LOC_Os11g03300.1	11.0828	5.52e-05	0.00174223	8.91364	0.000179133	0.00452556	34.3003	12.9383	293.212	127.855	305.375	218.162	NAC domain transcription factor, putative, expressed
LOC_Os11g03390.1	30.6299	1.08e-08	1.3e-06	26.8878	2.87e-08	3.15e-06	79.2455	27.0528	1560.75	1297.38	1446.87	1809.04	FHA domain containing protein, putative, expressed
LOC_Os11g03390.2	43.5998	0.00108846	0.0193116	38.2071	0.00173556	0.0278184	0	1.17621	22.1436	22.7959	18.0644	33.218	FHA domain containing protein, putative, expressed
LOC_Os11g04020.1	6599	8.83e-13	4.24e-10	2645	9.18e-11	2.65e-08	0	0	224.491	65.4143	75.6986	510.839	major facilitator superfamily antiporter, putative, expressed
LOC_Os11g04030.1	89.6212	1.6e-07	1.31e-05	46.6068	7.67e-06	0.000337275	1.18277	1.17621	53.4502	56.4942	72.2577	139.157	major facilitator superfamily antiporter, putative, expressed
LOC_Os11g04190.1	58.8855	2.63e-08	2.79e-06	30.3956	2.15e-06	0.000120306	2.36554	3.52863	93.9196	85.2368	131.612	215.468	auxin efflux carrier component, putative, expressed
LOC_Os11g04660.1	20.709	0.000374223	0.00826907	16.4674	0.000995368	0.0179937	1.18277	1.17621	25.9615	12.8846	12.043	36.8092	strictosidine synthase, putative, expressed
LOC_Os11g05160.1	5.67418	0.00217852	0.0334412	6.28415	0.00126764	0.0217482	46.128	31.7576	236.708	252.737	179.784	262.153	DNA binding protein, putative, expressed
LOC_Os11g05390.1	27.8721	3.58e-05	0.00122496	13.8676	0.000872567	0.0162319	2.36554	3.52863	54.9773	26.7604	61.9352	102.347	transporter, major facilitator family, putative, expressed
LOC_Os11g05480.1	14.1273	5.12e-06	0.000240022	13.2576	7.62e-06	0.000335374	63.8695	15.2907	612.386	437.086	664.943	453.381	transcription factor, putative, expressed
LOC_Os11g05640.1	9.26492	8.23e-05	0.00242708	8.48569	0.000156431	0.00406199	48.4935	75.2774	493.269	557.013	610.75	535.977	bZIP transcription factor domain containing protein, expressed
LOC_Os11g05740.1	57.4771	1.9e-08	2.11e-06	10.3414	0.000982663	0.0177874	7.09661	0	29.7794	43.6095	198.709	209.184	B3 DNA binding domain containing protein, expressed
LOC_Os11g06570.1	6599	9.67e-07	5.91e-05	2645	3.38e-05	0.00114211	0	0	31.3065	29.7338	69.6771	59.2538	transposon protein, putative, CACTA, En/Spm sub-class, expressed
LOC_Os11g06720.1	6.21093	0.000626051	0.0123031	12.4483	5.62e-06	0.000263047	468.376	403.44	5697.79	5154.84	2008.59	3406.19	abscisic stress-ripening, putative, expressed
LOC_Os11g06900.1	18.4578	4.55e-06	0.000219551	37.5602	2.65e-08	2.98e-06	9.46215	2.35242	223.727	220.03	84.3007	133.77	amidase family protein, putative, expressed
LOC_Os11g06910.1	6.74955	0.000536436	0.0109229	8.34421	0.000144287	0.00379186	49.6763	63.5153	465.78	478.714	308.816	455.177	myosin heavy chain-related, putative, expressed
LOC_Os11g07050.1	5.86031	0.00154027	0.0253208	14.635	4.37e-06	0.000215112	35.4831	45.8722	591.006	599.631	163.44	313.327	FHA domain containing protein, putative, expressed
LOC_Os11g07830.1	8.92981	0.00194487	0.0305643	22.5922	7.87e-06	0.00034501	4.73108	2.35242	101.555	58.4764	11.1827	52.0715	dirigent, putative, expressed
LOC_Os11g08020.1	5.41495	0.0014873	0.0246984	5.17202	0.00189234	0.0296619	377.303	350.51	2121.97	1642.29	2203.86	1737.21	ankyrin repeat family protein, putative, expressed
LOC_Os11g08569.1	5.49479	0.00128601	0.0220158	5.52381	0.00120587	0.0208308	911.915	646.915	4779.97	3830.7	4200.41	4365.03	cycloartenol synthase, putative, expressed
LOC_Os11g09680.1	10.7956	3.16e-05	0.00109701	8.57208	0.000140172	0.00371058	74.5144	31.7576	481.815	429.157	495.482	651.792	expressed protein
LOC_Os11g10130.1	6599	2.69e-05	0.000966068	2645	0.0010648	0.0189759	0	0	14.5079	15.858	46.4514	29.6269	MYB family transcription factor, putative, expressed
LOC_Os11g10520.1	48.4067	4.27e-08	4.24e-06	35.8863	3.46e-07	2.59e-05	2.36554	3.52863	118.354	93.1658	147.956	137.361	dehydrogenase, putative, expressed
LOC_Os11g12340.1	49.8488	6.36e-10	1.23e-07	57.2643	2.08e-10	5.08e-08	18.9243	12.9383	997.991	826.599	675.266	913.047	disease resistance protein RPM1, putative, expressed
LOC_Os11g13750.1	7.94542	0.00028256	0.00664342	23.2029	1.68e-07	1.41e-05	18.9243	29.4052	623.84	497.545	149.677	234.322	expressed protein
LOC_Os11g14240.1	14.3683	3.89e-05	0.00130872	19.5189	5.44e-06	0.000255996	9.46215	4.70484	149.661	126.864	87.7415	115.814	expressed protein
LOC_Os11g15040.1	8.73525	7.22e-05	0.00217705	9.2437	5.05e-05	0.0015932	322.896	172.903	2470.93	2112.09	2836.12	1494.81	S-adenosyl-L-methionine:benzoic acid/salicylic acid carboxyl methyltransferase, putative, expressed
LOC_Os11g15040.3	8.01724	0.00171597	0.0275983	12.2147	0.000199728	0.00495393	11.8277	7.05725	130.571	100.104	110.107	41.2981	S-adenosyl-L-methionine:benzoic acid/salicylic acid carboxyl methyltransferase, putative, expressed
LOC_Os11g15624.1	16.4328	1.59e-06	9.01e-05	15.2198	2.4e-06	0.00013186	34.3003	58.8104	928.506	488.625	878.275	651.792	expressed protein
LOC_Os11g16530.1	286.589	2.78e-10	6.02e-08	271.457	4.49e-10	9.58e-08	0	1.17621	145.843	173.447	154.838	182.25	mal, putative, expressed
LOC_Os11g16970.1	6599	1.66e-05	0.000652541	2645	7.53e-06	0.000332537	0	0	41.233	47.574	34.4084	39.5025	carnitine racemase like protein, putative, expressed
LOC_Os11g17504.1	54.8921	3.08e-08	3.19e-06	96.5357	4.27e-10	9.19e-08	4.73108	0	273.36	183.358	117.849	141.85	retrotransposon protein, putative, Ty1-copia subclass, expressed
LOC_Os11g18044.1	9.26532	0.000248136	0.00594962	7.98848	0.000647082	0.0127874	16.5588	1.17621	63.3766	78.2989	61.075	103.245	peptide transporter PTR2, putative, expressed
LOC_Os11g18570.1	79.6294	3.08e-09	4.49e-07	224.585	6.9e-13	4.9e-10	1.18277	2.35242	535.265	258.684	132.472	149.032	cytochrome P450, putative, expressed
LOC_Os11g18690.1	101.651	8.39e-09	1.06e-06	16.3647	0.000466141	0.00978153	3.54831	0	31.3065	26.7604	169.462	191.228	glycosyl hydrolase family 3 protein, putative, expressed
LOC_Os11g18730.1	9.99221	4.2e-05	0.00139067	8.61365	0.000108339	0.00299156	36.6658	54.1056	416.148	365.725	282.149	624.858	glycosyl hydrolase family 3 protein, putative, expressed
LOC_Os11g18940.1	8.42655	0.000128512	0.00345307	6.6344	0.000585953	0.0117572	79.2455	65.8677	481.052	481.687	472.256	750.548	WW domain containing protein, expressed
LOC_Os11g21804.1	6599	6.03e-09	8.05e-07	2645	9.18e-12	4.16e-09	0	0	224.491	213.092	59.3546	111.325	expressed protein
LOC_Os11g22350.1	17.2519	4.11e-06	0.000202007	9.57964	0.000172305	0.00438701	18.9243	17.6431	184.785	165.518	314.837	316.02	white-brown complex homolog protein, putative, expressed
LOC_Os11g22960.1	61.9098	2.12e-07	1.66e-05	41.1809	3.14e-06	0.000163741	2.36554	1.17621	52.6866	93.1658	77.419	141.85	expressed protein
LOC_Os11g23200.1	28.2616	8.63e-05	0.00252824	39.5286	1.5e-05	0.000581022	3.54831	0	84.7567	55.503	47.3116	52.9693	retrotransposon protein, putative, unclassified, expressed
LOC_Os11g26950.1	20.209	8.92e-05	0.00259068	13.0515	0.000858923	0.0160421	2.36554	2.35242	32.8337	28.7426	36.9891	58.356	UDP-glucoronosyl and UDP-glucosyl transferase domain containing protein, expressed
LOC_Os11g28104.1	6599	2.82e-06	0.00014579	2645	2.5e-05	0.00089647	0	0	32.8337	33.6983	38.7095	67.3338	TKL_IRAK_DUF26-lf.4 - DUF26 kinases have homology to DUF26 containing loci, expressed
LOC_Os11g28184.1	8.51379	0.00284771	0.0413627	19.7391	4.37e-05	0.00141326	5.91384	4.70484	111.482	98.1214	47.3116	43.0937	expressed protein
LOC_Os11g28910.1	57.7766	0.000367342	0.00814457	32.7066	0.00279984	0.0405046	1.18277	0	19.8529	18.8314	38.7095	29.6269	transposon protein, putative, CACTA, En/Spm sub-class, expressed
LOC_Os11g29420.1	169.887	1.45e-09	2.42e-07	56.4776	1.62e-06	9.52e-05	2.36554	0	67.1945	66.4054	172.042	229.833	LTPL30 - Protease inhibitor/seed storage/LTP family protein precursor, putative, expressed
LOC_Os11g30560.1	104.691	1.44e-12	6.43e-10	80.8396	1.09e-11	4.7e-09	17.7415	11.7621	1315.64	1069.42	1101.07	1987.69	dehydrogenase/reductase, putative, expressed
LOC_Os11g31090.1	7.79555	0.000352927	0.0079	6.92864	0.000672083	0.0131947	29.5692	23.5242	202.347	165.518	123.01	290.882	transferase family protein, putative, expressed
LOC_Os11g31190.1	14.418	4.2e-06	0.000205706	13.228	8.2e-06	0.000357483	42.5797	39.9911	515.412	576.835	533.331	657.178	nodulin MtN3 family protein, putative, expressed
LOC_Os11g31940.1	53.5885	7.08e-08	6.54e-06	88.9191	1.86e-09	3.18e-07	4.73108	0	241.289	179.394	94.6232	158.908	GDSL-like lipase/acylhydrolase, putative, expressed
LOC_Os11g31980.1	10.5262	2.89e-05	0.00102614	7.39882	0.000330058	0.0074769	72.1489	72.925	439.055	634.32	638.277	888.807	OsSCP63 - Putative Serine Carboxypeptidase homologue, expressed
LOC_Os11g32100.1	7.93268	0.000151944	0.00393165	6.49889	0.000601167	0.0119888	105.266	149.379	719.287	935.622	966.017	1054	inducer of CBF expression 1, putative, expressed
LOC_Os11g32520.1	52.0536	0.000209089	0.00515666	44.2586	0.000395445	0.00868119	1.18277	0	30.543	21.8048	29.2472	32.3202	OsGH3.13 - Probable indole-3-acetic acid-amido synthetase, expressed
LOC_Os11g32650.1	11.5132	1.3e-05	0.0005289	15.023	1.88e-06	0.000108292	86.3421	71.7487	1216.37	1158.63	465.374	1354.76	chalcone synthase, putative, expressed
LOC_Os11g34440.1	6599	0.000416894	0.00895761	2645	5.12e-05	0.00160811	0	0	32.0701	29.7338	11.1827	26.0358	phospholipase A2, putative, expressed
LOC_Os11g34720.1	658.309	3.69e-18	2.01e-14	451.321	8.31e-17	4.52e-13	4.73108	4.70484	2282.32	1976.3	3227.51	2984.24	Ser/Thr protein phosphatase family protein, putative, expressed
LOC_Os11g35274.1	59.2297	1.31e-09	2.2e-07	33.4604	8.47e-08	8.04e-06	5.91384	8.23346	247.398	225.977	342.364	495.577	protein kinase domain containing protein, expressed
LOC_Os11g35390.1	68.9774	1.18e-08	1.4e-06	54.7795	6.21e-08	6.14e-06	0	4.70484	122.935	134.793	113.548	210.979	MYB family transcription factor, putative, expressed
LOC_Os11g35450.1	24.9518	0.000975667	0.0176555	33.9977	0.000277053	0.00645075	2.36554	0	42.7601	37.6628	25.8063	33.218	leucine-rich repeat receptor protein kinase EXS precursor, putative, expressed
LOC_Os11g36030.1	10.9063	2.67e-05	0.000960981	15.4104	2.73e-06	0.000145282	52.0418	39.9911	625.367	792.9	492.901	510.839	protein binding protein, putative, expressed
LOC_Os11g36940.1	165.98	1.59e-11	5.1e-09	65.5969	2.13e-08	2.48e-06	3.54831	0	96.9739	135.784	184.945	404.003	glucan endo-1,3-beta-glucosidase precursor, putative, expressed
LOC_Os11g37560.1	11.3782	2.25e-05	0.000841	5.77573	0.00162915	0.0265162	74.5144	32.9339	295.503	325.089	518.707	703.863	expressed protein
LOC_Os11g38050.1	25.5851	3.12e-07	2.31e-05	25.0231	3.33e-07	2.51e-05	18.9243	4.70484	367.279	223.994	341.504	263.051	phosphoesterase family protein, putative, expressed
LOC_Os11g39990.1	21.6991	2.07e-07	1.64e-05	16.2098	1.73e-06	0.000101005	35.4831	30.5814	560.463	510.43	559.997	873.544	patatin, putative, expressed
LOC_Os11g40009.1	6599	1.42e-07	1.18e-05	2645	1.5e-05	0.00058191	0	0	19.8529	40.6361	60.2148	76.3117	phospholipase, patatin family, putative, expressed
LOC_Os11g40210.1	36.9326	1.66e-07	1.36e-05	38.1234	1.47e-07	1.26e-05	4.73108	4.70484	166.459	193.269	181.505	166.988	remorin C-terminal domain containing protein, putative, expressed
LOC_Os11g41650.1	7.37361	0.00196461	0.0307879	10.7353	0.000221967	0.00537494	4.73108	5.88104	63.3766	50.5474	37.8493	40.4003	adenylyl-sulfate kinase, putative, expressed
LOC_Os11g42220.1	6599	5.63e-11	1.51e-08	2645	1.44e-07	1.25e-05	0	0	39.7059	55.503	91.1824	188.535	laccase precursor protein, putative, expressed
LOC_Os11g42450.1	71.9799	4.94e-08	4.81e-06	49.6439	5.45e-07	3.79e-05	1.18277	2.35242	96.2103	79.29	114.408	140.054	leucine-rich repeat family protein, putative, expressed
LOC_Os11g42970.1	10.2319	9.41e-05	0.0027059	9.12566	0.000187851	0.00471302	29.5692	18.8193	244.344	197.234	298.493	196.615	membrane associated DUF588 domain containing protein, putative, expressed
LOC_Os11g43480.1	6599	0.000448358	0.00947174	2645	0.000607417	0.0120987	0	0	17.5622	7.929	3.44084	25.138	Leucine Rich Repeat family protein, expressed
LOC_Os11g45400.1	17.1346	8.79e-07	5.53e-05	19.0871	3.91e-07	2.87e-05	44.9452	69.3963	1187.36	995.09	960.856	998.336	glycerol-3-phosphate acyltransferase, putative, expressed
LOC_Os11g45540.1	12.6531	0.000109038	0.00304832	7.23784	0.00220663	0.0335576	10.6449	10.5859	76.3574	77.3078	139.354	129.281	TKL_IRAK_DUF26-lh.11 - DUF26 kinases have homology to DUF26 containing loci, expressed
LOC_Os11g47510.1	13.6202	4.65e-06	0.000222635	5.97516	0.00113325	0.0198919	107.632	58.8104	474.179	520.341	1786.66	480.315	glycosyl hydrolase, putative, expressed
LOC_Os11g47950.1	19.8591	0.00196516	0.0307879	23.6064	0.00113213	0.0198829	2.36554	0	22.1436	33.6983	34.4084	12.569	cyclin, putative, expressed
LOC_Os12g01370.1	6.61423	0.000595882	0.0118527	6.03189	0.00100218	0.0180669	56.7729	68.2201	400.113	353.832	270.106	556.626	fatty acid desaturase, putative, expressed
LOC_Os12g01560.1	10.7512	2.25e-05	0.000842118	9.10557	7.13e-05	0.00209723	72.1489	99.9778	770.446	796.865	734.62	1115.95	PMR5, putative, expressed
LOC_Os12g01700.1	13.5259	5.45e-06	0.000251932	18.8047	5.33e-07	3.73e-05	65.0523	27.0528	833.059	898.951	521.288	724.512	inactive receptor kinase At2g26730 precursor, putative, expressed
LOC_Os12g01730.1	6599	0.00184559	0.0292925	2645	3.93e-05	0.00129568	0	0	27.4887	25.7693	4.30106	17.9557	laccase-23 precursor, putative, expressed
LOC_Os12g01830.1	8.26542	0.00013404	0.00356143	6.03759	0.00102369	0.0183803	112.363	104.683	604.751	705.681	899.781	894.193	staphylococcal nuclease homologue, putative, expressed
LOC_Os12g02230.1	6.57116	0.00317153	0.0450843	9.40215	0.000510815	0.0105077	11.8277	9.40967	101.555	98.1214	73.1179	66.4361	expressed protein
LOC_Os12g02250.1	13.9655	3.17e-06	0.000161804	8.42853	9.98e-05	0.00279488	136.018	92.9205	1127.8	801.821	2049.88	1147.37	STE_PAK_Ste20_Slob_Wnk.3 - STE kinases include homologs to sterile 7, sterile 11 and sterile 20 from yeast, expressed
LOC_Os12g02310.1	17.0641	5.73e-07	3.86e-05	12.9432	4.13e-06	0.000206395	363.11	564.58	6725.56	5281.71	6135.89	9694.28	LTPL11 - Protease inhibitor/seed storage/LTP family protein precursor, expressed
LOC_Os12g02330.2	359.723	1.52e-11	4.92e-09	374.762	1.14e-11	4.78e-09	0	1.17621	233.654	207.145	240.859	182.25	LTPL13 - Protease inhibitor/seed storage/LTP family protein precursor, expressed
LOC_Os12g02980.1	6.70414	0.00168647	0.0272714	9.61057	0.000256052	0.00602609	14.1932	11.7621	90.8653	158.58	65.376	108.632	nucleoside-triphosphatase, putative, expressed
LOC_Os12g03070.2	6.57237	0.00149518	0.0247915	8.21663	0.000401925	0.00877626	24.8381	18.8193	203.111	155.607	110.967	175.966	FHA domain containing protein, putative, expressed
LOC_Os12g03650.1	6599	2.08e-07	1.64e-05	2645	6.07e-06	0.000279461	0	0	45.8144	33.6983	92.9028	61.9471	D-mannose binding lectin family protein, expressed
LOC_Os12g03830.1	6599	8.89e-06	0.000383791	2645	0.000165402	0.00424099	0	0	38.9423	7.929	16.344	85.2895	major facilitator superfamily antiporter, putative, expressed
LOC_Os12g03860.1	12.2737	3.99e-05	0.00133628	11.5278	5.97e-05	0.00181902	26.0209	9.40967	209.219	199.216	197.849	237.015	major facilitator superfamily antiporter, putative, expressed
LOC_Os12g04000.1	45.9829	9.92e-06	0.000421447	38.6343	2.89e-05	0.00100597	2.36554	0	35.888	55.503	37.8493	70.925	auxin efflux carrier component, putative, expressed
LOC_Os12g04150.1	16.677	3.7e-05	0.00125594	12.5323	0.000168052	0.00429546	8.27938	2.35242	81.7024	51.5385	30.9676	146.339	alpha/beta hydrolase fold, putative, expressed
LOC_Os12g04320.1	6599	1.08e-09	1.86e-07	2645	1.27e-09	2.29e-07	0	0	148.133	79.29	123.87	114.019	sulfotransferase domain containing protein, expressed
LOC_Os12g04870.1	45.2222	3.53e-05	0.00121222	27.0674	0.000346693	0.00778355	2.36554	0	41.233	22.7959	58.4944	48.4804	expressed protein
LOC_Os12g05200.1	15.4525	0.000372366	0.00823921	14.666	0.000517922	0.0106205	5.91384	1.17621	43.5237	60.4587	40.4299	69.1294	DNA binding protein, putative, expressed
LOC_Os12g05680.1	5.19443	0.00256009	0.0381341	4.99981	0.00311801	0.044054	105.266	75.2774	496.323	406.361	522.148	415.674	transcription factor, putative, expressed
LOC_Os12g05890.1	329.494	2.27e-10	5.05e-08	95.7298	8.08e-07	5.35e-05	1.18277	0	55.7409	57.4853	183.225	206.49	expressed protein
LOC_Os12g06160.1	14.4434	5.76e-06	0.000265571	10.7957	4.32e-05	0.00140136	33.1175	24.7004	300.085	324.098	387.095	447.994	DUF623 domain containing protein, expressed
LOC_Os12g09300.1	15.3814	1.5e-06	8.51e-05	4.86086	0.00300983	0.04294	134.836	138.793	681.872	648.196	1644.72	2564.07	amino acid transporter, putative, expressed
LOC_Os12g12470.1	15.3305	1.09e-05	0.000454427	13.8637	2.16e-05	0.000792128	24.8381	1.17621	173.331	187.323	139.354	259.46	NADP-dependent oxidoreductase, putative, expressed
LOC_Os12g12560.1	6599	2.61e-05	0.000944268	2645	4.61e-05	0.00147492	0	0	32.8337	33.6983	24.0859	52.0715	NADP-dependent oxidoreductase, putative, expressed
LOC_Os12g12580.1	6599	2e-05	0.000766603	2645	2.6e-05	0.000921574	0	0	22.1436	32.7071	12.9032	43.9914	NADP-dependent oxidoreductase, putative, expressed
LOC_Os12g13100.1	5.064	0.00270768	0.0398423	5.05737	0.00291332	0.0418498	150.212	52.9294	460.435	566.924	414.622	614.085	WW domain containing protein, expressed
LOC_Os12g13100.2	51.2327	0.000209226	0.00515666	41.453	0.000499515	0.010347	0	1.17621	25.9615	22.7959	18.0644	42.1959	WW domain containing protein, expressed
LOC_Os12g15920.1	92.0276	1.08e-07	9.25e-06	68.2755	5.27e-07	3.7e-05	2.36554	0	119.881	41.6273	92.9028	124.792	laccase precursor protein, putative, expressed
LOC_Os12g16010.1	8.68133	0.000230803	0.00559975	6.20124	0.00168644	0.0272137	21.2898	36.4625	171.804	186.332	237.418	263.949	sex determination protein tasselseed-2, putative, expressed
LOC_Os12g16080.1	64.6733	1.92e-08	2.12e-06	69.449	1.34e-08	1.69e-06	4.73108	0	131.335	197.234	106.666	199.308	expressed protein
LOC_Os12g16220.2	6599	4.73e-05	0.001532	2645	6.88e-05	0.00204429	0	0	17.5622	33.6983	22.3655	31.4225	nmrA-like family domain containing protein, expressed
LOC_Os12g16240.1	6599	6.16e-05	0.00191105	2645	2.22e-05	0.000807899	0	0	25.1979	22.7959	6.02148	34.1158	nmrA-like family domain containing protein, expressed
LOC_Os12g16250.1	6599	4.5e-06	0.000217589	2645	2.43e-06	0.000132666	0	0	25.9615	44.6006	21.5053	40.4003	nmrA-like family domain containing protein, expressed
LOC_Os12g18360.1	9.74097	0.00086004	0.0159699	8.26635	0.00202589	0.0313787	3.54831	7.05725	45.0509	42.6184	60.2148	43.0937	NB-ARC domain containing protein, expressed
LOC_Os12g18410.1	18.6156	1.12e-06	6.61e-05	18.0254	1.11e-06	7e-05	21.2898	31.7576	692.562	263.639	453.331	534.182	expressed protein
LOC_Os12g18530.1	19.6305	0.000249645	0.00597704	29.6775	3.12e-05	0.00107559	4.73108	0	80.9389	59.4675	52.4729	40.4003	nucleotidyltransferase, putative, expressed
LOC_Os12g19304.1	8.08625	0.000203541	0.00504699	7.14291	0.000430972	0.00924789	57.9557	52.9294	435.237	356.805	478.277	418.368	Fe-S metabolism associated domain containing protein, expressed
LOC_Os12g19470.1	6.42283	0.000481674	0.0100201	6.82412	0.000321076	0.00734383	6895.54	5592.87	45811.4	39411.1	35903.5	44307.5	ribulose bisphosphate carboxylase small chain, chloroplast precursor, putative, expressed
LOC_Os12g19470.2	8.41913	8.89e-05	0.00258416	6.80849	0.000331353	0.00749584	516.87	539.88	4172.93	3021.94	3949.23	4947.69	ribulose bisphosphate carboxylase small chain, chloroplast precursor, putative, expressed
LOC_Os12g22284.1	20.5573	8.9e-07	5.57e-05	19.7024	1.13e-06	7.13e-05	11.8277	15.2907	302.375	231.923	227.096	330.385	white-brown complex homolog protein 11, putative, expressed
LOC_Os12g22800.1	6599	0.000134774	0.00357222	2645	4.22e-05	0.00137276	0	0	35.888	37.6628	31.8278	22.4446	expressed protein
LOC_Os12g25180.1	6599	3.11e-11	9.28e-09	2645	4.09e-10	8.84e-08	0	0	113.773	120.917	151.397	182.25	expressed protein
LOC_Os12g26290.1	32.7521	3.94e-08	3.96e-06	75.1366	6.48e-11	2.01e-08	7.09661	11.7621	829.241	587.737	267.526	350.136	alpha-DOX2, putative, expressed
LOC_Os12g26940.1	43.761	1.73e-07	1.4e-05	18.0424	5.47e-05	0.00169629	4.73108	1.17621	48.1052	58.4764	83.4405	175.068	CHASE domain containing protein, expressed
LOC_Os12g28137.1	38.1693	1.79e-07	1.45e-05	10.2897	0.000509937	0.0104963	4.73108	5.88104	62.6131	46.5829	160.859	244.197	ATPase 3, putative, expressed
LOC_Os12g28550.1	56.6653	4.08e-09	5.77e-07	6.58201	0.00336413	0.0466834	7.09661	7.05725	46.578	46.5829	321.719	480.315	ATPase, AAA family domain containing protein, expressed
LOC_Os12g29160.1	392.375	1.13e-14	1.24e-11	233.787	7.58e-13	5.27e-10	0	3.52863	414.621	410.326	530.75	853.793	LTPL105 - Protease inhibitor/seed storage/LTP family protein precursor, putative, expressed
LOC_Os12g29220.1	131.779	1.68e-13	1.18e-10	70.065	2.62e-11	9.09e-09	16.5588	22.348	1558.45	1167.55	2510.96	2616.14	nodulin MtN3 family protein, putative, expressed
LOC_Os12g29570.2	9.65202	0.000272934	0.00646828	9.56325	0.000308121	0.00708309	18.9243	10.5859	130.571	151.642	138.494	146.339	expressed protein
LOC_Os12g31510.1	12.5555	0.000444574	0.00940397	16.6459	0.000116363	0.00317819	2.36554	7.05725	65.6674	91.1835	66.2362	52.0715	expressed protein
LOC_Os12g32130.1	29.1424	1.15e-06	6.73e-05	11.5247	0.000266561	0.00623299	2.36554	10.5859	87.811	61.4498	238.278	139.157	trehalose phosphatase, putative, expressed
LOC_Os12g33120.1	139.878	8.73e-08	7.9e-06	40.6331	0.000148259	0.00388064	1.18277	0	18.3258	29.7338	55.9137	109.53	expressed protein
LOC_Os12g34840.1	8.91343	0.000206881	0.00512203	9.76672	0.000122429	0.00330792	20.1071	18.8193	180.967	199.216	134.193	212.775	rhoGAP domain containing protein, expressed
LOC_Os12g36890.1	9.14281	5.87e-05	0.00183678	12.7251	6.01e-06	0.000276706	172.684	108.211	1811.2	1763.21	1036.55	1531.62	CSLD4 - cellulose synthase-like family D, expressed
LOC_Os12g37260.1	9.38358	5.9e-05	0.00184129	6.32022	0.000720833	0.0139001	131.287	70.5725	691.035	584.764	1010.75	883.42	lipoxygenase 2.1, chloroplast precursor, putative, expressed
LOC_Os12g38010.1	11.0729	1.99e-05	0.000764945	32.2457	7.53e-09	1.02e-06	63.8695	49.4008	2008.2	1644.28	615.911	638.325	metallothionein, putative, expressed
LOC_Os12g38051.1	16.7693	6.53e-07	4.28e-05	18.2611	3.61e-07	2.69e-05	390.314	318.753	6527.79	6420.51	6179.76	5710.81	metallothionein, putative, expressed
LOC_Os12g38270.1	30.3408	7.02e-09	9.15e-07	63.2335	1.81e-11	6.76e-09	331.175	125.854	17456.1	11443.5	6343.2	7523.43	metallothionein, putative, expressed
LOC_Os12g38270.2	6599	5.25e-05	0.00167001	2645	3.27e-05	0.0011135	0	0	53.4502	18.8314	29.2472	37.707	metallothionein, putative, expressed
LOC_Os12g38290.1	24.466	4.39e-08	4.32e-06	57.0697	5.43e-11	1.74e-08	140.75	61.1629	6388.06	5135.02	2498.91	2441.08	metallothionein, putative, expressed
LOC_Os12g38300.1	8.0774	0.000119022	0.00325036	7.86334	0.00017772	0.0045038	592.567	372.858	2522.85	5068.62	3042.57	4755.56	metallothionein, putative, expressed
LOC_Os12g39710.1	12.5796	0.000103708	0.00294012	11.676	0.000162232	0.00417566	4.73108	8.23346	74.0667	77.3078	48.1718	114.916	expressed protein
LOC_Os12g39980.1	13.7283	4.38e-06	0.00021312	21.2496	1.89e-07	1.56e-05	55.5901	51.7532	1072.82	1208.18	566.879	906.762	kinesin motor domain containing protein, putative, expressed
LOC_Os12g41060.1	18.4652	2.09e-05	0.000796072	18.8457	1.95e-05	0.000725311	7.09661	4.70484	108.428	113.979	108.387	109.53	AP2 domain containing protein, expressed
LOC_Os12g41690.1	6599	0.000908149	0.0166925	2645	1.31e-06	7.95e-05	0	0	52.6866	30.7249	11.1827	12.569	membrane associated DUF588 domain containing protein, putative, expressed
LOC_Os12g41860.1	5.10203	0.00210942	0.0326103	5.50343	0.00144319	0.0241019	395.045	378.739	1976.89	2281.57	1883.86	2064.01	START domain containing protein, expressed
LOC_Os12g41910.1	6.3098	0.000609717	0.0120691	5.50445	0.00148231	0.0245543	277.951	211.718	1262.19	1433.17	1449.46	1640.25	BTBN25 - Bric-a-Brac, Tramtrack, Broad Complex BTB domain with non-phototropic hypocotyl 3 NPH3 and coiled-coil domains, expressed
LOC_Os12g42160.1	8.72924	0.000172414	0.00438495	15.5956	3.83e-06	0.000194299	33.1175	17.6431	373.388	418.255	153.118	289.984	kinesin motor domain containing protein, putative, expressed
LOC_Os12g43000.1	9.85282	0.00104774	0.0186907	16.9404	7.1e-05	0.00209254	10.6449	0	63.3766	116.953	44.731	60.1516	retrotransposon protein, putative, unclassified, expressed
LOC_Os12g43510.1	90.4119	2.15e-10	4.81e-08	111.278	4.26e-11	1.39e-08	2.36554	4.70484	432.946	353.832	266.665	372.581	expressed protein
LOC_Os12g44090.1	14.5331	2.82e-06	0.00014579	12.6083	8.48e-06	0.000367581	82.7938	50.577	762.81	918.773	884.297	1054	leucine-rich repeat family protein, putative, expressed
LOC_Os12g44110.2	232.064	2.83e-12	1.23e-09	118.541	5.33e-10	1.1e-07	0	3.52863	169.513	248.772	511.826	307.042	ligA, putative, expressed
LOC_Os12g44300.1	254.864	4.12e-11	1.15e-08	52.7384	1.64e-06	9.61e-05	0	2.35242	62.6131	61.4498	312.257	287.291	CHX28, putative, expressed
LOC_Os01g01560.1	0.126748	0.0018176	0.0289061	0.101919	0.000804049	0.0152281	105.266	138.793	12.9808	11.8935	11.1827	19.7513	transposon protein, putative, unclassified, expressed
LOC_Os01g02050.1	0.0666428	3.84e-06	0.000191479	0.117188	0.000178401	0.00451459	696.651	685.73	91.6289	70.3699	49.032	43.0937	phosphoenolpyruvate carboxylase, putative, expressed
LOC_Os01g02930.1	0.0590482	5.99e-07	3.98e-05	0.0642591	1.58e-06	9.33e-05	17642.2	20742.4	1464.54	1002.03	1303.22	963.323	glycosyltransferase protein, putative, expressed
LOC_Os01g03330.1	0.149709	0.000426101	0.00910754	0.173926	0.00116001	0.0201989	2804.35	3513.34	566.572	532.234	585.804	360.012	BBTI3 - Bowman-Birk type bran trypsin inhibitor precursor, expressed
LOC_Os01g03340.1	0.0635946	9.93e-07	6.01e-05	0.130833	0.000166717	0.00427135	59201.1	75965.5	8232.86	9451.37	4716.54	3879.33	BBTI4 - Bowman-Birk type bran trypsin inhibitor precursor, expressed
LOC_Os01g03360.1	0.105365	3.82e-05	0.00128807	0.0987484	2.95e-05	0.00102656	40710.9	48528	4848.7	3963.51	6059.33	3343.35	BBTI5 - Bowman-Birk type bran trypsin inhibitor precursor, expressed
LOC_Os01g06150.1	0.042466	1.1e-07	9.41e-06	0.0849139	1.52e-05	0.000587975	1104.71	1272.66	90.8653	111.006	31.8278	69.1294	expressed protein
LOC_Os01g06560.1	0.00763822	6.44e-14	5.26e-11	0.0782032	6.27e-06	0.000286659	9787.41	12430.2	974.321	763.167	81.72	87.9829	transcription factor HBP-1b, putative, expressed
LOC_Os01g07150.1	0.0193667	8.42e-10	1.51e-07	0.0278697	1.42e-08	1.77e-06	830.304	848.047	25.9615	20.8136	16.344	16.1601	expressed protein
LOC_Os01g09490.1	0.106948	0.00014786	0.00384425	0.0462539	8.18e-07	5.4e-05	425.797	374.034	12.2172	24.7781	55.9137	29.6269	transposon protein, putative, unclassified, expressed
LOC_Os01g10370.1	0.00350924	1.19e-08	1.4e-06	0	2.08e-09	3.45e-07	107.632	148.202	0	0	0	0.897785	AP2 domain containing protein, expressed
LOC_Os01g11270.1	0.0990271	0.000213684	0.00524187	0.169358	0.00337405	0.0467708	132.47	127.031	22.1436	21.8048	7.7419	17.9557	cytochrome P450, putative, expressed
LOC_Os01g11300.1	0.0408528	1.13e-07	9.66e-06	0.125273	0.000259231	0.00609212	558.267	703.373	101.555	56.4942	32.688	18.8535	cytochrome P450, putative, expressed
LOC_Os01g11520.1	0.198119	0.0030079	0.0431334	0.197672	0.00348607	0.0480085	769.983	662.206	164.168	118.935	163.44	120.303	RING-H2 finger protein, putative, expressed
LOC_Os01g11730.1	0.112433	5.6e-05	0.00176173	0.18307	0.00163804	0.026621	68987.4	62742.5	14411.7	9704.11	6289.86	8520.87	GDSL-like lipase/acylhydrolase, putative, expressed
LOC_Os01g13210.1	0.146849	0.000330686	0.00752064	0.20614	0.00311627	0.0440485	18298.6	18742.9	4296.63	3339.1	2306.23	3133.27	salt stress root protein RS1, putative, expressed
LOC_Os01g14530.1	0.197423	0.00285663	0.0414369	0.201035	0.00324761	0.0455307	555.901	689.258	114.536	135.784	106.666	139.157	AWPM-19-like membrane family protein, putative, expressed
LOC_Os01g18950.1	0	1.19e-11	4.27e-09	0.00184363	1.04e-10	2.99e-08	237.737	176.431	0.763574	0	0	0	peroxidase precursor, putative, expressed
LOC_Os01g18970.1	0.025853	4.33e-08	4.29e-06	0.0289948	1.37e-07	1.2e-05	363.11	308.167	14.5079	4.95563	13.7634	3.59114	peroxidase precursor, putative, expressed
LOC_Os01g19020.1	0.0447879	6.65e-08	6.19e-06	0.0474347	1.55e-07	1.33e-05	70594.7	72419.2	3846.12	2937.7	2290.74	4114.55	peroxidase precursor, putative, expressed
LOC_Os01g19050.1	0.0569664	5.97e-06	0.000274405	0.0928432	0.00011247	0.00309514	269.671	207.013	24.4344	19.8225	15.4838	11.6712	transposon protein, putative, unclassified, expressed
LOC_Os01g19800.1	0.135381	0.000221609	0.00541285	0.109319	6.62e-05	0.00197322	3658.3	4333.15	484.106	389.512	635.696	446.199	zinc finger, C3HC4 type, putative, expressed
LOC_Os01g20980.1	0.0820837	7.15e-06	0.000318977	0.0291678	4e-09	5.97e-07	7418.33	8264.04	234.417	223.003	805.158	482.11	pectinesterase, putative, expressed
LOC_Os01g24550.1	0.0549003	3.62e-07	2.62e-05	0.0343859	1.63e-08	1.98e-06	16284.4	15734.1	695.616	405.37	1151.82	606.005	fruit bromelain precursor, putative, expressed
LOC_Os01g24560.1	0.0555579	3.82e-07	2.74e-05	0.0282686	3.16e-09	4.89e-07	34219.9	34405.3	1143.07	796.865	2492.03	1320.64	fruit bromelain precursor, putative, expressed
LOC_Os01g24570.1	0.051995	2.78e-07	2.1e-05	0.0210186	4.06e-10	8.84e-08	5659.55	5475.25	135.916	98.1214	413.762	165.192	fruit bromelain precursor, putative, expressed
LOC_Os01g24600.1	0.0485796	1.54e-07	1.27e-05	0.0346846	2e-08	2.36e-06	7148.66	7113.71	322.228	172.456	416.342	276.518	fruit bromelain precursor, putative, expressed
LOC_Os01g24700.1	0.00252093	6.46e-18	3.02e-14	0.010428	1.19e-12	7.6e-10	33691.2	35241.6	421.493	297.338	111.827	61.9471	expressed protein
LOC_Os01g36070.1	0.154206	0.000468195	0.00975834	0.177906	0.0012789	0.0218841	8156.37	8241.7	1521.8	1395.5	1200.85	1327.82	nodulin MtN3 family protein, putative, expressed
LOC_Os01g36550.1	0.0758513	4.93e-05	0.00158585	0.0488418	4.71e-06	0.00022788	173.867	272.88	9.92646	11.8935	25.8063	8.08006	protein kinase family protein, putative, expressed
LOC_Os01g36720.1	0.0627182	0.00125376	0.0216337	0.0789725	0.00320835	0.045077	68.6006	43.5197	6.87217	1.98225	3.44084	3.59114	transporter, major facilitator family, putative, expressed
LOC_Os01g39000.1	0.154515	0.000466574	0.00973698	0.201663	0.00257083	0.0377749	8161.11	8776.87	1714.99	1700.77	1107.09	1510.07	ZmGR2c, putative, expressed
LOC_Os01g39000.3	0.126107	0.000140663	0.00368511	0.188839	0.00188014	0.0295273	3114.23	2747.62	555.882	551.066	341.504	397.719	ZmGR2c, putative, expressed
LOC_Os01g41120.1	0.0650239	1.18e-06	6.87e-05	0.0486228	1.95e-07	1.6e-05	19577.2	20876.5	1125.51	841.466	1234.4	1396.05	retrotransposon protein, putative, Ty3-gypsy subclass, expressed
LOC_Os01g41240.1	0.0692613	2.09e-06	0.000112697	0.0158448	4.24e-11	1.39e-08	6091.26	7200.75	121.408	89.2013	484.299	436.323	hydrolase, alpha/beta fold family domain containing protein, expressed
LOC_Os01g41430.1	0.140144	0.000301454	0.00698765	0.054713	6.22e-07	4.26e-05	2050.92	2550.02	139.734	111.997	406.88	237.913	UDP-glucoronosyl and UDP-glucosyl transferase, putative, expressed
LOC_Os01g42190.1	0.0307145	4.35e-06	0.000212405	0.03453	1.13e-05	0.0004647	128.922	98.8016	6.87217	0.991125	4.30106	2.69335	heat shock protein DnaJ, putative, expressed
LOC_Os01g42520.1	0.164013	0.000660464	0.0128863	0.0832788	8.48e-06	0.000367581	47032.8	57704.8	4471.49	4250.94	7890.72	9287.58	expressed protein
LOC_Os01g42860.1	0.0452062	1.07e-07	9.24e-06	0.0642289	1.9e-06	0.000109122	2796.07	2192.45	178.676	141.731	98.9243	126.588	inhibitor I family protein, putative, expressed
LOC_Os01g43750.1	0.159299	0.00325055	0.0458684	0.121314	0.00106115	0.0189315	68.6006	109.387	10.69	10.9024	8.60211	19.7513	cytochrome P450 72A1, putative, expressed
LOC_Os01g46660.1	0.0386077	0.000158608	0.00407459	0.0725904	0.00142364	0.0238485	66.2351	69.3963	6.87217	2.97338	3.44084	1.79557	transposon protein, putative, unclassified, expressed
LOC_Os01g48530.1	0.197106	0.0028956	0.0418721	0.148707	0.00068046	0.0132942	690.737	824.523	125.226	100.104	171.182	127.485	expressed protein
LOC_Os01g49240.1	0.0320459	2.27e-08	2.46e-06	0.0296354	2.07e-08	2.43e-06	838.583	997.425	33.5973	20.8136	30.1074	28.7291	limonoid UDP-glucosyltransferase, putative, expressed
LOC_Os01g49360.1	0.19387	0.00209225	0.0324214	0.152205	0.000531231	0.0108661	1693.73	1990.15	270.305	290.4	359.568	354.625	FAD-binding and arabino-lactone oxidase domains containing protein, putative, expressed
LOC_Os01g50160.1	0.0968496	2.11e-05	0.000801518	0.17113	0.00112953	0.0198479	10034.6	11299.8	2212.84	1438.12	1058.92	1007.31	MDR-like ABC transporter, putative, expressed
LOC_Os01g50410.1	0.149988	0.000420051	0.00900176	0.0265136	3.02e-09	4.74e-07	3176.92	4462.54	135.153	67.3965	610.75	535.08	STE_MEKK_ste11_MAP3K.6 - STE kinases include homologs to sterile 7, sterile 11 and sterile 20 from yeast, expressed
LOC_Os01g50420.1	0.140169	0.000279516	0.00658607	0.0275249	3.61e-09	5.48e-07	3217.13	4074.39	121.408	79.29	608.169	413.879	STE_MEKK_ste11_MAP3K.7 - STE kinases include homologs to sterile 7, sterile 11 and sterile 20 from yeast, expressed
LOC_Os01g50440.1	0.107786	7.32e-05	0.00219957	0.18244	0.00193823	0.0302504	656.437	1000.95	152.715	149.66	82.5803	96.0629	AWPM-19-like membrane family protein, putative, expressed
LOC_Os01g53790.1	0.160601	0.000655006	0.0127875	0.102126	4.21e-05	0.00137276	3276.27	3936.77	401.64	335	671.825	486.599	stress-induced protein, putative, expressed
LOC_Os01g54230.1	0.0467685	0.000107865	0.00301809	0	5.05e-08	5.23e-06	89.8904	96.4491	0	0	6.02148	2.69335	expressed protein
LOC_Os01g55820.1	0.205566	0.00276586	0.0404616	0.136566	0.000247726	0.00586393	2914.34	3979.12	442.873	498.536	690.749	726.308	X8 domain containing protein, expressed
LOC_Os01g56570.1	0.119863	0.000140705	0.00368511	0.0566939	1.23e-06	7.58e-05	987.612	1033.89	61.0859	53.5208	125.591	116.712	xylosyltransferase, putative, expressed
LOC_Os01g62430.1	0.184363	0.00163761	0.0266428	0.0377638	5.71e-08	5.77e-06	1693.73	1582	77.121	46.5829	314.837	289.087	C2 domain containing protein, putative, expressed
LOC_Os01g65380.1	0.134297	0.00018646	0.00468385	0.151292	0.000456985	0.00966889	57208.2	61469.9	9252.99	8702.08	7858.89	8079.16	patellin protein, putative, expressed
LOC_Os01g67010.1	0.153615	0.000463495	0.00969389	0.164445	0.000865337	0.0161423	6511.14	6987.86	1261.42	958.418	991.823	1081.83	expressed protein
LOC_Os01g70280.1	0.0140087	0.00140952	0.0235383	0.0322813	0.00334396	0.0465023	43.7625	17.6431	0	1.98225	0.860211	0	expressed protein
LOC_Os01g71830.1	0.200954	0.00242094	0.0364441	0.194878	0.00268071	0.0390406	3174.55	3222.81	808.625	438.077	658.922	626.654	glycosyl hydrolases family 17, putative, expressed
LOC_Os01g72810.1	0.124059	0.000130119	0.00347739	0.0677264	2.5e-06	0.000135229	2589.08	3550.97	217.619	198.225	422.364	339.363	secreted glycoprotein, putative, expressed
LOC_Os02g02370.1	0.0327764	2.02e-08	2.22e-06	0.0183366	3.97e-10	8.7e-08	1098.79	1156.21	17.5622	23.787	34.4084	39.5025	myb-like DNA-binding domain containing protein, putative, expressed
LOC_Os02g03870.1	0.0287333	2.34e-09	3.57e-07	0.0406415	5.15e-08	5.31e-06	13003.4	14801.4	641.402	488.625	351.826	447.097	periplasmic beta-glucosidase precursor, putative, expressed
LOC_Os02g04755.1	0.138612	0.00229139	0.0348951	0.0633403	5.6e-05	0.00172863	123.008	157.612	6.87217	10.9024	34.4084	4.48892	transposon protein, putative, unclassified, expressed
LOC_Os02g08220.1	0.212964	0.00341182	0.0477319	0.214928	0.00362281	0.0493506	3124.88	3383.95	643.693	755.238	740.642	645.507	expressed protein
LOC_Os02g10520.1	0.0716003	3.19e-06	0.000162624	0.0496829	2.87e-07	2.25e-05	2392.74	2607.66	127.517	120.917	189.246	168.783	OsSub12 - Putative Subtilisin homologue, expressed
LOC_Os02g10800.1	0	1.05e-05	0.000442598	0.019308	0.000142631	0.00376648	60.3212	42.3435	0	1.98225	0	0	mitochondrial carrier protein, putative, expressed
LOC_Os02g13260.1	0.131127	0.00046408	0.00969389	0.0488282	2.02e-06	0.00011517	341.82	359.92	21.3801	12.8846	30.9676	61.0493	F-box family protein, putative, expressed
LOC_Os02g14180.1	0.0972819	0.00010656	0.00299572	0.0451361	1.2e-06	7.49e-05	247.199	418.73	12.2172	17.8403	37.8493	26.9335	peroxidase precursor, putative, expressed
LOC_Os02g15290.1	0.118749	0.000185875	0.00467275	0.0259454	1.11e-08	1.42e-06	542.891	724.545	16.0351	16.8491	110.107	40.4003	VQ domain containing protein, putative, expressed
LOC_Os02g18410.1	0.17685	0.00104155	0.0186209	0.170655	0.000956544	0.0174854	38041.4	46270.9	7402.85	6985.45	6325.13	8585.51	salt stress root protein RS1, putative, expressed
LOC_Os02g21300.1	0.055732	8.95e-07	5.59e-05	0.108036	8.53e-05	0.0024427	778.262	1033.89	94.6832	101.095	30.9676	70.0272	transposon protein, putative, unclassified, expressed
LOC_Os02g22680.1	0.0128543	1.25e-07	1.06e-05	0.00819955	5.79e-08	5.81e-06	109.998	169.374	2.29072	0	0	3.59114	integral membrane protein DUF6 containing protein, expressed
LOC_Os02g26770.1	0.0602977	6.75e-07	4.42e-05	0.0963772	2.67e-05	0.000944237	9148.72	9421.43	991.883	797.856	324.3	795.437	cytochrome P450, putative, expressed
LOC_Os02g26810.1	0.0596848	7.85e-07	5.04e-05	0.107653	6.22e-05	0.00187996	2978.21	3018.15	348.19	297.338	130.752	227.139	cytochrome P450, putative, expressed
LOC_Os02g27690.1	0.107135	0.00257646	0.0382907	0.0901509	0.00139822	0.0235313	81.6111	74.1012	6.10859	7.929	8.60211	8.08006	Leucine Rich Repeat family protein, expressed
LOC_Os02g30780.1	0.194404	0.00200934	0.0313408	0.197783	0.00235365	0.0352767	3531.75	4629.56	799.462	814.705	879.136	707.454	LGC1, putative, expressed
LOC_Os02g32814.1	0.100159	2.74e-05	0.000981205	0.101296	3.84e-05	0.00127051	6359.75	7354.83	782.663	606.569	636.556	737.081	heavy metal-associated domain containing protein, expressed
LOC_Os02g36830.1	0.123616	0.00060108	0.0119343	0.146164	0.00154092	0.0253453	63.8695	63.5153	10.69	7.929	9.46232	6.28449	cytokinin-O-glucosyltransferase 2, putative, expressed
LOC_Os02g37490.1	0.0149381	1.21e-11	4.27e-09	0.0211786	3.3e-10	7.29e-08	80071.1	109599	2438.09	1578.86	1893.32	939.98	glycine-rich cell wall structural protein precursor, putative, expressed
LOC_Os02g39330.1	0.137926	0.000250716	0.00599389	0.0531985	4.47e-07	3.21e-05	3305.84	3619.2	203.874	164.527	516.127	439.017	CHIT1 - Chitinase family protein precursor, expressed
LOC_Os02g40950.1	0.00587888	5.96e-07	3.96e-05	0.0781727	0.00050445	0.0104096	85.1594	61.1629	1.52715	9.91125	0.860211	0	transposon protein, putative, unclassified, expressed
LOC_Os02g41840.1	0.185511	0.00295754	0.0425419	0.115049	0.000245519	0.00582011	277.951	421.083	42.7601	37.6628	73.1179	56.5604	DUF584 domain containing protein, putative, expressed
LOC_Os02g41860.1	0.0462468	8.78e-08	7.91e-06	0.101197	3.55e-05	0.00119033	12138.8	14253.3	1447.74	1223.05	338.923	881.624	aquaporin protein, putative, expressed
LOC_Os02g41860.2	0.0505062	2.07e-07	1.64e-05	0.10609	5.11e-05	0.00160567	2824.45	4114.38	373.388	362.752	95.4834	254.971	aquaporin protein, putative, expressed
LOC_Os02g41954.2	0.137583	0.000820061	0.0153849	0.0568814	4.9e-06	0.000235665	270.854	286.995	9.92646	21.8048	51.6127	25.138	gibberellin 2-beta-dioxygenase 7, putative, expressed
LOC_Os02g42430.1	0.194175	0.00291271	0.0420638	0.170697	0.00147609	0.024501	580.74	610.452	99.2646	104.068	151.397	79.9028	GEM, putative, expressed
LOC_Os02g42585.1	0.194084	0.00315411	0.0448562	0.0317397	1.05e-07	9.62e-06	248.381	516.356	18.3258	5.94675	55.0535	93.3696	AP2 domain containing protein, expressed
LOC_Os02g43170.1	0.207531	0.00301292	0.0431621	0.0840185	1.12e-05	0.000464537	2655.32	3954.41	301.612	253.728	844.727	527	B-box zinc finger family protein, putative, expressed
LOC_Os02g43170.2	0.11912	0.000190478	0.00476647	0.0831168	2.53e-05	0.00090445	456.549	638.681	50.3959	40.6361	75.6986	54.7649	B-box zinc finger family protein, putative, expressed
LOC_Os02g44108.1	0.159339	0.000552134	0.0111453	0.111085	6.29e-05	0.00189593	21362	22289.2	2512.92	2336.08	2935.04	4020.28	expansin precursor, putative, expressed
LOC_Os02g44300.1	0.128008	0.000215585	0.00528151	0.142438	0.000491787	0.010229	790.09	842.166	124.463	108.033	87.7415	121.201	MSP domain containing protein, expressed
LOC_Os02g46360.1	0.184534	0.00204958	0.0318509	0.138549	0.00040906	0.00889638	642.244	863.337	101.555	107.042	175.483	102.347	invertase/pectin methylesterase inhibitor family protein, putative, expressed
LOC_Os02g47470.2	0.169964	0.00130521	0.0222512	0.159057	0.00110127	0.0194588	733.317	691.611	137.443	89.2013	148.817	93.3696	cytochrome P450, putative, expressed
LOC_Os02g48690.1	0.0816626	0.00140703	0.0235108	0.0446295	0.000190916	0.00477951	34.3003	105.859	2.29072	3.9645	5.16127	6.28449	expressed protein
LOC_Os02g51970.1	0.124516	0.000121582	0.00330017	0.0448695	1.28e-07	1.13e-05	9669.14	10936.4	592.533	332.027	1544.94	1020.78	phosphate-induced protein 1 conserved region domain containing protein, expressed
LOC_Os02g52000.1	0.0990803	2.61e-05	0.000944268	0.0338099	1.43e-08	1.79e-06	6457.92	6878.47	259.615	191.287	661.502	659.872	phosphate-induced protein 1 conserved region domain containing protein, expressed
LOC_Os02g54530.1	0.0495099	4.82e-06	0.000227427	0.0298771	3.26e-07	2.48e-05	197.522	279.938	5.34502	8.92013	13.7634	9.87563	SCP-like extracellular protein, expressed
LOC_Os02g56120.1	0.144937	0.000487316	0.0101053	0.0688329	5.82e-06	0.000270326	667.082	852.752	58.0316	46.5829	74.8384	145.441	OsIAA9 - Auxin-responsive Aux/IAA gene family member, expressed
LOC_Os02g56380.1	0.187014	0.00153538	0.0252658	0.0594507	9.66e-07	6.23e-05	10705.2	9682.55	745.248	466.82	2016.33	1796.47	OsWAK21 - OsWAK receptor-like cytoplasmic kinase OsWAK-RLCK, expressed
LOC_Os03g01260.1	0.114924	0.000115556	0.0031869	0.110558	0.000109142	0.00301117	764.069	799.822	91.6289	81.2723	78.2792	101.45	expansin precursor, putative, expressed
LOC_Os03g01320.1	0.0987486	2.27e-05	0.000845919	0.111083	5.81e-05	0.00178189	200916	226101	22921.7	24512.5	17569	24598.4	LTPL116 - Protease inhibitor/seed storage/LTP family protein precursor, expressed
LOC_Os03g01420.1	0.0131197	3.93e-07	2.8e-05	0.141512	0.00247492	0.0367648	113.546	91.7443	2.29072	26.7604	0	2.69335	expressed protein
LOC_Os03g02040.1	0.143446	0.000285713	0.00670789	0.147102	0.000378725	0.00837605	46786.8	46459.1	6939.36	6777.32	6419.75	6956.03	remorin, putative, expressed
LOC_Os03g02920.1	0.182133	0.00126766	0.0217841	0.169041	0.000897442	0.0165626	41818	45893.3	7557.86	7268.91	7934.59	8040.56	peroxidase precursor, putative, expressed
LOC_Os03g02939.1	0.132611	0.000440753	0.00935341	0.159778	0.00128094	0.0219075	352.465	451.664	61.0859	67.3965	66.2362	40.4003	peroxidase precursor, putative, expressed
LOC_Os03g03724.1	0.0617124	1.79e-06	9.93e-05	0.0228582	1.66e-09	2.89e-07	1169.76	929.205	15.2715	32.7071	55.9137	73.6183	expressed protein
LOC_Os03g03724.2	0.0610057	1.47e-05	0.000588992	0.0279899	2.05e-07	1.67e-05	216.447	274.057	3.81787	9.91125	13.7634	16.1601	expressed protein
LOC_Os03g03810.1	0.102674	0.000106531	0.00299572	0.189202	0.00319851	0.0449868	283.865	410.497	58.0316	73.3433	32.688	38.6047	DEF8 - Defensin and Defensin-like DEFL family, expressed
LOC_Os03g04110.1	0.106886	4.21e-05	0.0013925	0.108615	5.66e-05	0.00174384	6054.59	7034.91	736.849	684.868	588.384	810.699	lysM domain-containing GPI-anchored protein precursor, putative, expressed
LOC_Os03g05140.1	0.0536813	3.26e-07	2.38e-05	0.0367958	2.74e-08	3.06e-06	4791.4	5732.84	213.801	173.447	261.504	303.451	receptor-like protein kinase 2 precursor, putative, expressed
LOC_Os03g05290.1	0.139294	0.000235608	0.00569941	0.125549	0.000144255	0.00379186	292336	324482	42048.5	35392.1	43060.4	42858.4	aquaporin protein, putative, expressed
LOC_Os03g05500.1	0.0798663	0.00184641	0.0292925	0.0447878	0.000263219	0.00617252	54.4074	34.1101	0	3.9645	2.58063	4.48892	DUF260 domain containing protein, putative, expressed
LOC_Os03g06700.1	0.137036	0.000246906	0.00592815	0.101519	4.31e-05	0.00140033	2612.74	3619.2	358.116	274.542	488.6	365.398	3-ketoacyl-CoA synthase, putative, expressed
LOC_Os03g06705.1	0.132491	0.000181767	0.00458712	0.111676	7.47e-05	0.00218152	8077.13	10902.3	1235.46	884.084	1482.14	1032.45	3-ketoacyl-CoA synthase, putative, expressed
LOC_Os03g06960.1	0.0434238	6.53e-05	0.00200496	0.0502649	0.000140125	0.00371058	98.1698	87.0395	5.34502	3.9645	0.860211	7.18228	vesicle-associated membrane protein, putative, expressed
LOC_Os03g16390.1	0.158104	0.000611824	0.0121035	0.101337	4.14e-05	0.00135155	2551.23	2788.79	289.395	251.746	464.514	379.763	avr9/Cf-9 rapidly elicited protein, putative, expressed
LOC_Os03g18120.1	0.060695	2.12e-06	0.000113904	0.166598	0.00105293	0.0188156	212.898	250.533	33.5973	43.6095	13.7634	14.3646	proteins of unknown function domain containing protein, expressed
LOC_Os03g19600.1	0.161569	0.000621892	0.0122434	0.0969679	2.27e-05	0.000823374	9979.02	11403.3	924.688	1148.71	1663.65	1791.08	retrotransposon protein, putative, unclassified, expressed
LOC_Os03g19820.1	0.0301495	5.76e-07	3.87e-05	0.0479476	6.8e-06	0.000306572	136.018	241.123	9.16289	8.92013	6.88169	4.48892	expressed protein
LOC_Os03g22210.1	0.131026	0.00040392	0.00873049	0.0886992	4.44e-05	0.00143041	244.833	218.775	18.3258	22.7959	27.5268	33.218	POEI46 - Pollen Ole e I allergen and extensin family protein precursor, expressed
LOC_Os03g25280.1	0.024596	6.46e-10	1.24e-07	0.0400405	4.07e-08	4.28e-06	50699.4	66424.1	2522.09	2167.59	1526.01	1354.76	peroxidase precursor, putative, expressed
LOC_Os03g25300.1	0.0243367	6.76e-10	1.27e-07	0.0374134	2.67e-08	3e-06	9177.1	11937.3	422.256	367.708	259.784	254.073	peroxidase precursor, putative, expressed
LOC_Os03g25320.1	0.0327371	4.36e-08	4.31e-06	0.0484486	5.76e-07	3.98e-05	568.912	722.192	22.9072	39.645	18.9246	23.3424	peroxidase precursor, putative, expressed
LOC_Os03g25340.1	0.0101202	8.06e-13	3.99e-10	0.021088	4.92e-10	1.04e-07	5770.73	6422.1	174.858	82.2634	73.1179	50.2759	peroxidase precursor, putative, expressed
LOC_Os03g25360.1	0.00877078	3.59e-09	5.14e-07	0	1.78e-11	6.76e-09	234.188	175.255	0	0	0	3.59114	peroxidase precursor, putative, expressed
LOC_Os03g25370.1	0.0210846	1.04e-07	9.14e-06	0.00596412	1.1e-09	2.04e-07	208.167	214.07	1.52715	0.991125	1.72042	7.18228	peroxidase precursor, putative, expressed
LOC_Os03g25460.1	0.0757568	7.04e-06	0.00031558	0.0790738	1.04e-05	0.00043629	809.014	1103.28	67.9581	83.2545	54.1933	90.6762	OsRCI2-4 - Putative low temperature and salt responsive protein, expressed
LOC_Os03g25760.1	0.0903511	1.66e-05	0.000652541	0.0492963	2.82e-07	2.21e-05	2228.34	2501.8	122.172	111.006	246.02	181.352	calmodulin-binding protein, putative, expressed
LOC_Os03g27480.1	0.0951307	2.96e-05	0.00104318	0.166084	0.00111479	0.01965	866.97	818.641	148.133	131.82	69.6771	90.6762	OsSCP14 - Putative Serine Carboxypeptidase homologue, expressed
LOC_Os03g32050.1	0.177893	0.00112986	0.0198736	0.14332	0.00036412	0.00812455	4257.97	4988.3	721.577	603.595	634.836	1010.01	peroxidase precursor, putative, expressed
LOC_Os03g32180.1	0.117376	0.000521163	0.0106609	0.0522171	1.18e-05	0.000477972	191.609	229.361	16.0351	5.94675	19.7849	29.6269	polygalacturonase inhibitor 1 precursor, putative, expressed
LOC_Os03g32190.1	0.143925	0.00263585	0.0389256	0.0447139	1.32e-05	0.000521468	115.911	158.788	5.34502	6.93788	19.7849	19.7513	transposon protein, putative, unclassified, expressed
LOC_Os03g36160.1	0.00446492	5.88e-10	1.15e-07	0.00379746	6.88e-10	1.35e-07	191.609	210.541	1.52715	0	0	1.79557	DNAJ heat shock N-terminal domain-containing protein, putative, expressed
LOC_Os03g36650.1	0.105951	0.000139365	0.0036642	0.0199529	9.6e-09	1.26e-06	385.583	371.682	9.16289	5.94675	33.5482	46.6848	cysteine-rich repeat secretory protein 55 precursor, putative, expressed
LOC_Os03g38540.1	0.0870327	1.05e-05	0.000443513	0.192345	0.0019592	0.0304759	7159.3	6730.27	1328.62	1342.98	689.029	519.817	folic acid binding protein, putative, expressed
LOC_Os03g38540.2	0.0622834	1.77e-06	9.8e-05	0.134885	0.000329788	0.00747596	1062.13	925.676	141.261	126.864	63.6556	60.1516	folic acid binding protein, putative, expressed
LOC_Os03g40800.1	0	0.0035404	0.0491519	0	0.00364782	0.0496273	16.5588	25.8766	0	0	0	0	expressed protein
LOC_Os03g41130.1	0.0167345	1.15e-06	6.74e-05	0.0213493	4.64e-06	0.000225304	94.6215	119.973	4.58144	0	0	3.59114	expressed protein
LOC_Os03g43010.1	0.0988142	2.6e-05	0.000944268	0.108288	6.04e-05	0.00183701	3395.73	3546.27	400.876	350.858	265.805	420.163	expressed protein
LOC_Os03g43400.1	0.167055	0.000834232	0.0156059	0.192021	0.00225876	0.034207	2218.87	2370.06	488.687	392.486	331.181	435.425	OsIAA11 - Auxin-responsive Aux/IAA gene family member, expressed
LOC_Os03g45920.1	0.206559	0.00262336	0.0388113	0.203155	0.00282389	0.0408165	41466.7	41931.9	9430.14	7512.73	7521.69	9705.05	tubulin/FtsZ domain containing protein, putative, expressed
LOC_Os03g49440.1	0.0772622	4.61e-06	0.000221369	0.0996082	3.87e-05	0.00127789	4654.2	4942.43	597.115	358.787	393.116	348.34	phosphatase, putative, expressed
LOC_Os03g51350.1	0.0304466	8.63e-05	0.00252824	0.016806	2.54e-05	0.000906007	29.5692	29.4052	0	0.991125	0	1.79557	expressed protein
LOC_Os03g52860.1	0.0205909	4.74e-10	9.49e-08	0.0484689	2.9e-07	2.26e-05	581.922	1049.18	47.3416	31.716	32.688	0.897785	lipoxygenase, putative, expressed
LOC_Os03g53150.1	0.0748739	3.23e-06	0.000164312	0.136131	0.000237148	0.00567107	26622.9	33571.4	4261.51	3932.79	1970.74	2536.24	OsIAA13 - Auxin-responsive Aux/IAA gene family member, expressed
LOC_Os03g58490.1	0.120065	0.000111013	0.00309822	0.156353	0.000686429	0.0133948	1864.04	2057.19	330.628	282.471	238.278	232.526	DUF593 domain containing protein, expressed
LOC_Os03g59430.2	0.0517247	3.23e-07	2.37e-05	0.0715114	4.92e-06	0.000236186	1582.54	1761.96	151.951	87.219	88.6017	84.3917	uncharacterized glycosyltransferase, putative, expressed
LOC_Os03g59440.1	0.0143216	1.24e-11	4.27e-09	0.100031	3.6e-05	0.00120072	4071.09	4396.67	453.563	393.477	18.9246	102.347	dirigent, putative, expressed
LOC_Os03g61470.1	0.149188	0.00167063	0.0270823	0.0426502	2.5e-06	0.000135229	192.791	266.999	10.69	8.92013	53.3331	15.2623	uncharacterized Cys-rich domain containing protein, putative, expressed
LOC_Os03g63200.1	0	4.46e-05	0.00146139	0	4.7e-05	0.00149528	55.5901	23.5242	0	0	0	0	powdery mildew resistance protein PM3b, putative, expressed
LOC_Os03g64340.1	0.111621	8.75e-05	0.0025504	0.0761886	8.42e-06	0.000365929	753.424	859.809	56.5045	66.4054	49.8922	130.179	heavy metal-associated domain containing protein, expressed
LOC_Os04g01354.1	0.107588	0.00172884	0.0277916	0.0399743	3.93e-05	0.00129568	109.998	84.687	3.81787	3.9645	13.7634	7.18228	chalcone synthase, putative, expressed
LOC_Os04g02640.1	0.154159	0.000811336	0.0152738	0.0246153	2.08e-08	2.44e-06	512.139	167.022	13.7443	2.97338	28.387	76.3117	3-ketoacyl-CoA synthase 6, putative, expressed
LOC_Os04g14690.1	0.0184886	9.9e-11	2.43e-08	0.0245966	1.27e-09	2.29e-07	4405.81	4295.52	109.955	104.068	78.2792	82.5962	flavin-containing monooxygenase family protein, putative, expressed
LOC_Os04g15840.1	0.047732	1.38e-07	1.15e-05	0.0874573	1.3e-05	0.000513774	3399.28	4456.66	335.209	351.85	171.182	203.797	expansin precursor, putative, expressed
LOC_Os04g23140.1	0.118937	0.000390048	0.00852653	0.105681	0.000306713	0.00707063	248.381	275.233	40.4694	14.8669	33.5482	28.7291	expressed protein
LOC_Os04g23550.2	0.160025	0.00239267	0.0361177	0.00865377	1.96e-09	3.28e-07	165.588	239.947	1.52715	1.98225	35.2687	29.6269	basic helix-loop-helix family protein, putative, expressed
LOC_Os04g25900.1	0.0330404	1.4e-08	1.61e-06	0.0279813	6.44e-09	8.87e-07	1372.01	1603.17	46.578	36.6716	30.9676	67.3338	go35 NBS-LRR, putative, expressed
LOC_Os04g28410.1	0.068503	0.00242098	0.0364441	0.0147196	0.000101634	0.00283515	43.7625	59.9867	1.52715	0	1.72042	5.38671	expressed protein
LOC_Os04g28580.1	0.0590653	7.46e-05	0.00223626	0.0735002	0.000207908	0.00511795	94.6215	69.3963	6.10859	5.94675	4.30106	5.38671	transposon protein, putative, unclassified, expressed
LOC_Os04g29000.1	0.0132405	2.26e-07	1.76e-05	0	8.13e-09	1.08e-06	62.6868	72.925	0	0	0	1.79557	sulfotransferase domain containing protein, expressed
LOC_Os04g33590.2	0.0371325	0.000587904	0.0117297	0.0678688	0.00334634	0.0465155	47.3108	49.4008	4.58144	1.98225	0	3.59114	hydrolase, alpha/beta fold family protein, putative, expressed
LOC_Os04g39370.1	0.16784	0.00135177	0.0227601	0.0507213	8.83e-07	5.77e-05	593.75	608.1	28.2522	32.7071	109.247	92.4718	heavy metal associated domain containing protein, expressed
LOC_Os04g41970.1	0.131448	0.000159396	0.00408886	0.084185	9.96e-06	0.000420533	27909.8	28674.8	2636.62	2126.96	2965.15	4472.76	endoglucanase, putative, expressed
LOC_Os04g44500.1	0.121851	0.000113096	0.00313495	0.0280585	3.67e-09	5.52e-07	4094.75	4447.25	133.625	106.05	670.965	369.887	GEM, putative, expressed
LOC_Os04g44510.1	0.177483	0.0011078	0.0195823	0.0504523	2.48e-07	1.97e-05	11700	13604	694.852	581.791	2315.69	2175.33	GEM, putative, expressed
LOC_Os04g45510.1	0	2.17e-13	1.42e-10	0.00247467	9.3e-12	4.16e-09	352.465	264.647	1.52715	0	0	0	expressed protein
LOC_Os04g45520.1	0	6.43e-07	4.23e-05	0	6.98e-07	4.72e-05	82.7938	52.9294	0	0	0	0	integral membrane protein, putative, expressed
LOC_Os04g46650.1	0.115558	0.00165861	0.0269409	0.066977	0.000226382	0.00545688	111.18	88.2157	8.39931	4.95563	6.88169	16.1601	expansin precursor, putative, expressed
LOC_Os04g47360.1	0.0615445	1.04e-06	6.24e-05	0.0770092	6.45e-06	0.000293671	2265	2759.39	201.584	185.34	135.053	174.17	OsPOP9 - Putative Prolyl Oligopeptidase homologue, expressed
LOC_Os04g48170.1	0.0257313	3.64e-09	5.19e-07	0.00997561	7.96e-12	3.78e-09	1046.75	1171.5	12.2172	9.91125	29.2472	27.8313	cytochrome P450, putative, expressed
LOC_Os04g48850.1	0.142372	0.000616367	0.0121639	0.10704	0.000127182	0.00341375	315.799	434.021	36.6516	43.6095	43.0106	63.7427	aminotransferase, classes I and II, domain containing protein, expressed
LOC_Os04g50880.1	0.146111	0.0003507	0.00789311	0.0996393	3.21e-05	0.0010958	4993.65	6218.62	568.099	549.084	929.888	708.352	phosphoribulokinase/Uridine kinase family protein, expressed
LOC_Os04g53560.1	0.182425	0.00218453	0.0335177	0.13356	0.000488241	0.010178	558.267	481.069	86.2839	52.5297	98.9243	90.6762	expressed protein
LOC_Os04g53710.1	0.0736668	8.48e-05	0.00249328	0.031295	2.67e-06	0.000142328	180.964	143.497	9.16289	0.991125	7.7419	16.1601	plastocyanin-like domain containing protein, putative, expressed
LOC_Os04g57200.2	0.130681	0.000274187	0.00648857	0.13063	0.000404688	0.00882478	534.612	616.334	100.792	49.5563	50.7525	99.6541	heavy metal transport/detoxification protein, putative, expressed
LOC_Os04g58390.1	0.17456	0.00107052	0.0190347	0.210465	0.00347205	0.0478355	2532.31	2751.15	558.936	553.048	405.159	517.124	allantoinase, putative, expressed
LOC_Os04g58820.1	0.127138	0.000160687	0.00411654	0.0836681	1.28e-05	0.000508435	2027.27	2160.7	197.766	152.633	265.805	266.642	ATOFP18/OFP18, putative, expressed
LOC_Os04g59190.1	0.0398146	2.82e-08	2.96e-06	0.058997	8.12e-07	5.37e-05	104960	111676	7541.82	5239.09	4597.83	4027.46	peroxidase precursor, putative, expressed
LOC_Os04g59480.1	0.124353	0.000169385	0.00431463	0.146797	0.000561483	0.0113219	845.68	899.8	141.261	114.971	107.526	109.53	POT family protein, expressed
LOC_Os05g02520.1	0.185809	0.00148542	0.0246797	0.19482	0.00234802	0.0352483	20961	17385.5	4408.11	3062.58	4391.38	2733.75	cupin domain containing protein, expressed
LOC_Os05g04410.1	0.0469274	1.05e-07	9.14e-06	0.094348	2.19e-05	0.000798459	12952.5	13008.9	1312.58	1136.82	554.836	663.463	peroxidase precursor, putative, expressed
LOC_Os05g04440.1	0.0127418	9.61e-12	3.58e-09	0.0292586	6.57e-09	9.02e-07	2065.11	2279.49	65.6674	61.4498	27.5268	27.8313	peroxidase precursor, putative, expressed
LOC_Os05g04470.1	0.126221	0.000128982	0.00345795	0.112824	6.89e-05	0.00204567	13015.2	16449.3	1676.05	1648.24	2066.23	1652.82	peroxidase precursor, putative, expressed
LOC_Os05g05060.1	0.169612	0.000907321	0.0166925	0.171929	0.00108465	0.0192043	2780.69	2731.16	481.815	465.829	486.879	447.994	expressed protein
LOC_Os05g06710.1	0.212796	0.00320809	0.0454459	0.178057	0.00129718	0.0221388	6258.03	6432.69	1184.3	1075.37	1192.25	1508.28	GDSL-like lipase/acylhydrolase, putative, expressed
LOC_Os05g11900.1	0.119037	8.71e-05	0.00254431	0.105925	4.8e-05	0.00152605	8539.59	9319.1	995.701	895.977	989.243	1136.6	expressed protein
LOC_Os05g11910.1	0.0690222	1.74e-06	9.72e-05	0.109066	5.4e-05	0.00167939	97552.4	110606	11609.4	11093.7	5932.88	8434.69	GDSL-like lipase/acylhydrolase, putative, expressed
LOC_Os05g12580.1	0.151482	0.000485478	0.01008	0.178736	0.00139468	0.0234839	1116.53	1966.62	252.743	298.329	159.999	307.042	expressed protein
LOC_Os05g13970.1	0.136857	0.000232692	0.00563721	0.0669009	2.18e-06	0.000121314	9326.13	11379.8	819.315	565.933	2067.95	765.81	phosphorylase domain containing protein, putative, expressed
LOC_Os05g13970.2	0.0942533	0.00149047	0.0247384	0.0469541	0.000178422	0.00451459	80.4283	87.0395	6.87217	0.991125	8.60211	7.18228	phosphorylase domain containing protein, putative, expressed
LOC_Os05g15920.1	0.0106294	8.5e-11	2.12e-08	0.00662696	8.11e-12	3.79e-09	521.601	537.528	3.0543	3.9645	9.46232	1.79557	glycosyl hydrolase, putative, expressed
LOC_Os05g19150.1	0.167131	0.000826033	0.0154791	0.0926186	1.96e-05	0.000728287	2518.12	2966.4	234.417	273.551	411.181	505.453	hydrolase, alpha/beta fold family domain containing protein, expressed
LOC_Os05g19570.1	0.00222057	9.21e-17	1.95e-13	0.00744646	3.35e-13	3.08e-10	1867.59	2107.77	13.7443	15.858	3.44084	5.38671	expansin precursor, putative, expressed
LOC_Os05g19600.1	0	2.8e-08	2.95e-06	0.00869433	6.74e-07	4.6e-05	70.9661	104.683	1.52715	0	0	0	expansin precursor, putative, expressed
LOC_Os05g25920.1	0.202626	0.00272706	0.0400554	0.0938299	3.47e-05	0.00116463	1804.91	2186.57	266.487	108.033	455.052	353.727	expressed protein
LOC_Os05g32720.1	0.0710784	0.00125196	0.0216139	0.0789597	0.00171304	0.027552	29.5692	94.0967	3.81787	5.94675	4.30106	4.48892	early-responsive to dehydration protein-related, putative, expressed
LOC_Os05g33820.1	0.189294	0.00165644	0.026919	0.159921	0.000715697	0.0138255	4041.52	4733.06	768.919	634.32	758.706	902.273	lipase, putative, expressed
LOC_Os05g36260.1	0.0683501	2.82e-06	0.00014579	0.063562	2.19e-06	0.000121705	1069.22	1325.59	77.8846	74.3344	55.0535	108.632	soluble inorganic pyrophosphatase, putative, expressed
LOC_Os05g41990.1	0.123858	0.000105522	0.00297547	0.0954697	2.16e-05	0.000792969	36613.8	39558.3	3637.67	3634.46	3275.68	6158.8	peroxidase precursor, putative, expressed
LOC_Os05g42360.1	0.13743	0.000671164	0.0130795	0.126721	0.000537658	0.0109729	195.157	478.717	52.6866	32.7071	58.4944	34.1158	expressed protein
LOC_Os05g43120.1	0.102919	4.92e-05	0.0015858	0.144426	0.000540052	0.0109983	1613.3	1206.79	259.615	147.678	220.214	70.0272	GDSL-like lipase/acylhydrolase, putative, expressed
LOC_Os05g44930.1	0.0448764	5.08e-07	3.49e-05	0.0881514	4.91e-05	0.00155681	463.645	454.017	51.1595	29.7338	23.2257	17.9557	receptor-like protein kinase, putative, expressed
LOC_Os05g44990.1	0	0.000450226	0.00950506	0	0.0004631	0.00974103	26.0209	18.8193	0	0	0	0	light repressible receptor protein kinase, putative, expressed
LOC_Os05g46750.1	0.0739255	1.06e-05	0.000443515	0.00820461	2.74e-11	9.42e-09	296.875	689.258	6.10859	1.98225	36.9891	35.9114	STE_MEKK_ste11_MAP3K.18 - STE kinases include homologs to sterile 7, sterile 11 and sterile 20 from yeast, expressed
LOC_Os05g46760.1	0.201781	0.0029048	0.0419867	0.0528408	8.07e-07	5.35e-05	630.416	1397.34	69.4852	37.6628	210.752	198.41	STE_MEKK_ste11_MAP3K.19 - STE kinases include homologs to sterile 7, sterile 11 and sterile 20 from yeast, expressed
LOC_Os05g48890.1	0.205686	0.00264712	0.0390743	0.0880167	1.36e-05	0.000534832	13160.7	17754.9	1485.15	1235.93	3434.82	2924.08	fasciclin domain containing protein, expressed
LOC_Os05g49010.1	0.0997016	0.000645847	0.0126464	0.0443283	1.93e-05	0.00072043	120.642	134.088	5.34502	5.94675	14.6236	10.7734	AP2 domain containing protein, expressed
LOC_Os05g49260.1	0.0367073	2.04e-08	2.23e-06	0.107386	6.23e-05	0.00187996	2315.86	2740.57	303.139	239.852	46.4514	139.157	transporter family protein, putative, expressed
LOC_Os05g50500.1	0.0619599	1.63e-06	9.21e-05	0.070802	5.05e-06	0.000241355	946.215	1286.77	84.7567	73.3433	79.9996	58.356	secretory protein, putative, expressed
LOC_Os06g05480.1	0.180992	0.00169718	0.027372	0.14097	0.000418847	0.00903106	710.844	1009.19	117.59	124.882	169.462	141.85	expressed protein
LOC_Os06g06430.1	0.161631	0.00166801	0.0270532	0.107243	0.000183034	0.0046063	234.188	397.559	32.0701	35.6805	67.0965	35.0136	expressed protein
LOC_Os06g09340.1	0.150915	0.000423903	0.00906647	0.135353	0.00023248	0.00557168	3120.14	3646.25	432.183	483.669	423.224	597.924	pectinesterase, putative, expressed
LOC_Os06g09870.1	0.031659	1.12e-08	1.34e-06	0.0205219	5.34e-10	1.1e-07	1452.44	2265.38	36.6516	39.645	100.645	17.0579	retrotransposon protein, putative, unclassified, expressed
LOC_Os06g10870.1	0.0203244	7.6e-10	1.39e-07	0.0106187	7.99e-12	3.78e-09	1143.74	1162.09	7.63574	16.8491	36.9891	9.87563	retrotransposon protein, putative, unclassified, expressed
LOC_Os06g13180.1	0.198869	0.00239523	0.0361397	0.05607	8.6e-07	5.64e-05	2534.67	2927.58	206.165	100.104	638.277	447.994	metalloendoproteinase 1 precursor, putative, expressed
LOC_Os06g14370.3	0.148552	0.00165355	0.0268855	0.0573609	1.71e-05	0.000649786	115.911	244.651	13.7443	6.93788	27.5268	26.0358	caleosin related protein, putative, expressed
LOC_Os06g17260.1	0.0387485	0.000649432	0.0126938	0.0714445	0.00266175	0.0388163	30.752	59.9867	1.52715	4.95563	1.72042	1.79557	UDP-glucoronosyl and UDP-glucosyl transferase domain containing protein, expressed
LOC_Os06g21390.4	0.12619	0.00226711	0.0345736	0.0770908	0.000316697	0.00724963	105.266	116.445	9.16289	7.929	17.2042	10.7734	Zinc finger C-x8-C-x5-C-x3-H type domain containing protein, expressed
LOC_Os06g21410.1	0.0693674	2.86e-06	0.00014708	0.0282221	4.71e-09	6.94e-07	1342.44	2512.38	47.3416	61.4498	147.096	120.303	arabinogalactan peptide 23 precursor, putative, expressed
LOC_Os06g22960.1	0.175517	0.00102754	0.0184005	0.166272	0.000827452	0.0155342	191741	192472	33577.4	30306.6	38460.9	28975.1	aquaporin protein, putative, expressed
LOC_Os06g29470.1	0	1.11e-17	3.34e-14	0.00339993	3.79e-14	6.19e-11	688.372	926.853	1.52715	3.9645	0	0	peroxidase precursor, putative, expressed
LOC_Os06g35480.1	0.120543	9.64e-05	0.00276553	0.0745116	4.36e-06	0.000215039	6331.36	7655.94	553.591	488.625	780.211	905.865	peroxidase precursor, putative, expressed
LOC_Os06g35770.1	0.209429	0.0031829	0.045187	0.0733647	5.17e-06	0.000246048	1435.88	1999.56	142.025	110.015	300.214	419.265	expressed protein
LOC_Os06g37010.1	0.0343042	1.78e-08	2.01e-06	0.0852502	1.12e-05	0.000462009	1139.01	2053.66	97.7375	174.438	41.2901	68.2316	metal cation transporter, putative, expressed
LOC_Os06g40180.1	0.0911542	1.63e-05	0.000645667	0.0368462	3.7e-08	3.96e-06	2378.55	2399.47	107.664	68.3877	203.01	232.526	phospholipase D, putative, expressed
LOC_Os06g41740.1	0.128502	0.000438841	0.00932494	0.145289	0.000889068	0.0164453	225.909	312.872	36.6516	41.6273	38.7095	30.5247	transposon protein, putative, CACTA, En/Spm sub-class, expressed
LOC_Os06g44010.1	0.115891	9.21e-05	0.00266507	0.0122393	1.44e-11	5.69e-09	1609.75	1906.63	25.1979	17.8403	207.311	200.206	WRKY28, expressed
LOC_Os06g44410.1	0.0977715	2.97e-05	0.00104679	0.130488	0.00023317	0.00558411	1594.37	1571.42	216.855	196.243	128.171	181.352	histidine kinase, putative, expressed
LOC_Os06g45180.1	0.00506141	1.2e-10	2.9e-08	0.0186095	2.77e-08	3.09e-06	234.188	290.524	3.81787	5.94675	0.860211	1.79557	pollen allergen, putative, expressed
LOC_Os06g45190.1	0	0.00102194	0.0183304	0.0143764	0.0035345	0.048471	33.1175	19.9956	0.763574	0	0	0	pollen allergen, putative, expressed
LOC_Os06g45290.1	0.00801658	3.14e-05	0.00109562	0.0255892	0.000208295	0.00512361	48.4935	58.8104	0.763574	1.98225	0.860211	0	pollen allergen, putative, expressed
LOC_Os06g50940.1	0.0444321	1.06e-07	9.24e-06	0.0284217	5.61e-09	7.96e-07	2539.4	1831.36	68.7217	55.503	96.3436	97.8585	GDSL-like lipase/acylhydrolase, putative, expressed
LOC_Os06g50950.1	0.0709224	2.24e-06	0.000119713	0.0696833	2.89e-06	0.000153099	15302.7	16491.6	1332.44	883.093	1014.19	1240.74	GDSL-like lipase/acylhydrolase, putative, expressed
LOC_Os07g01840.1	0.157751	0.000693275	0.0134462	0.121167	0.000169004	0.00430968	959.226	1086.82	135.916	111.997	133.333	189.433	expressed protein
LOC_Os07g03279.1	0.0709138	2.28e-06	0.000121368	0.142133	0.000342011	0.00769432	15067.3	20389.6	2907.69	2131.91	1425.37	1089.01	SCP-like extracellular protein, expressed
LOC_Os07g05830.1	0.132559	0.00025854	0.00616291	0.0190318	5.26e-10	1.1e-07	1128.36	1249.13	24.4344	20.8136	204.73	110.427	zinc-finger protein, putative, expressed
LOC_Os07g07320.1	0.0899125	3.29e-05	0.0011378	0.12023	0.000198482	0.0049305	221.178	229.361	24.4344	29.7338	18.0644	22.4446	glutathione S-transferase, putative, expressed
LOC_Os07g10590.1	0.0723345	0.00026281	0.00625557	0.011909	6.92e-07	4.71e-05	113.546	78.806	2.29072	0	10.3225	3.59114	transporter family protein, putative, expressed
LOC_Os07g14610.1	0.166655	0.00152087	0.0251285	0.159614	0.00120081	0.0207762	353.648	431.669	54.9773	70.3699	66.2362	64.6405	IAA-amino acid hydrolase ILR1-like 6 precursor, putative, expressed
LOC_Os07g24830.1	0.090033	1.18e-05	0.00048486	0.194722	0.00229237	0.0345878	9599.35	3291.03	1375.2	1134.84	67.9567	1092.6	thionin-like peptide, putative, expressed
LOC_Os07g29650.1	0.0697385	0.0008172	0.01534	0.0472466	0.000218106	0.00529714	63.8695	84.687	3.0543	3.9645	9.46232	0.897785	transposon protein, putative, unclassified, expressed
LOC_Os07g32680.1	0.0595589	7.33e-07	4.76e-05	0.0637163	1.54e-06	9.12e-05	4547.75	6226.85	380.26	306.258	415.482	226.242	retrotransposon protein, putative, unclassified, expressed
LOC_Os07g32700.1	0.0239947	2.48e-09	3.7e-07	0.0180534	5.27e-10	1.1e-07	844.497	1163.27	21.3801	14.8669	27.5268	20.649	retrotransposon protein, putative, unclassified, expressed
LOC_Os07g34710.1	0.0167736	1.28e-10	3.05e-08	0.00953608	2.74e-12	1.54e-09	1342.44	1625.52	11.4536	16.8491	31.8278	17.9557	peroxidase precursor, putative, expressed
LOC_Os07g35480.1	0.0754844	3.47e-06	0.000174342	0.108313	5.48e-05	0.00169764	87869.1	86988.9	10343.4	8596.03	6910.08	6288.98	glucan endo-1,3-beta-glucosidase precursor, putative, expressed
LOC_Os07g35480.2	0.125064	0.000554561	0.0111805	0.138448	0.00115214	0.0201261	256.661	196.427	38.9423	23.787	38.7095	17.9557	glucan endo-1,3-beta-glucosidase precursor, putative, expressed
LOC_Os07g37045.1	0.0514707	2.3e-05	0.000854284	0.0246352	1.12e-06	7.08e-05	153.76	152.907	4.58144	2.97338	8.60211	7.18228	expressed protein
LOC_Os07g38130.1	0.190211	0.00161792	0.0264245	0.170323	0.000868562	0.0161666	47339.1	50485.2	7629.63	9032.13	8122.97	10484.3	polygalacturonase inhibitor 1 precursor, putative, expressed
LOC_Os07g41350.1	0.0276892	1.61e-09	2.62e-07	0.081309	7.29e-06	0.000323399	31518.4	42307.1	3111.56	2891.11	844.727	1199.44	B12D protein, putative, expressed
LOC_Os07g43970.1	0.137086	0.000410757	0.00884319	0.126801	0.000329519	0.00747504	475.473	622.215	81.7024	57.4853	69.6771	80.8006	calmodulin-binding protein, putative, expressed
LOC_Os07g44020.1	0.0793554	0.000301477	0.00698765	0.095271	0.000586518	0.0117613	111.18	90.5681	5.34502	13.8758	3.44084	12.569	SNARE associated Golgi protein, putative, expressed
LOC_Os07g44180.1	0.145899	0.000316306	0.00726438	0.206607	0.00291567	0.0418651	16251.2	16888	3455.17	3391.63	1984.51	2850.47	OsRCI2-10 - Hydrophobic protein LTI6A, expressed
LOC_Os07g44450.1	0.00758863	3.81e-13	2.13e-10	0.0401294	8.86e-08	8.34e-06	1240.72	1780.78	68.7217	52.5297	9.46232	13.4668	dirigent, putative, expressed
LOC_Os07g44590.1	0.071043	9.77e-05	0.00279727	0.0641542	5.24e-05	0.00164072	120.642	159.964	6.10859	11.8935	16.344	3.59114	peroxidase precursor, putative, expressed
LOC_Os07g44930.1	0.00724667	4.62e-10	9.31e-08	0.0457549	4.16e-06	0.000206759	192.791	297.581	14.5079	7.929	0.860211	2.69335	dirigent, putative, expressed
LOC_Os07g45260.1	0.0151871	2.01e-10	4.54e-08	0.0100408	2.42e-11	8.7e-09	717.941	786.884	9.16289	5.94675	11.1827	11.6712	glycosyl transferase 8 domain containing protein, putative, expressed
LOC_Os07g46350.1	0.131561	0.000177796	0.0045008	0.0850643	1.21e-05	0.000486655	2845.74	3081.67	270.305	233.906	295.913	483.906	OsSCP40 - Putative Serine Carboxypeptidase homologue, expressed
LOC_Os07g48710.1	0.206379	0.00286495	0.0415208	0.0649718	2.1e-06	0.000118755	2689.62	3278.09	232.127	155.607	599.567	632.04	VQ domain containing protein, putative, expressed
LOC_Os08g02530.1	0.0264698	9.1e-06	0.000390841	0.0463178	5.92e-05	0.00181	83.9766	115.268	2.29072	6.93788	2.58063	2.69335	OsSAUR32 - Auxin-responsive SAUR gene family member, expressed
LOC_Os08g06060.1	0.154868	0.000580668	0.0116066	0.199577	0.00262709	0.0384483	1463.09	1326.76	253.507	303.284	200.429	231.628	CGMC_MAPKCMGC_2_ERK.13 - CGMC includes CDA, MAPK, GSK3, and CLKC kinases, expressed
LOC_Os08g09010.1	0.0226329	4.21e-10	8.59e-08	0.032011	9.86e-09	1.29e-06	6476.84	4553.11	205.401	147.678	101.505	148.134	Cupin domain containing protein, expressed
LOC_Os08g13980.1	0.0260545	0.0020285	0.0315532	0	0.000230278	0.00553515	29.5692	36.4625	0	0	1.72042	0	glycosyl hydrolases family 16, putative, expressed
LOC_Os08g28410.1	0.0296326	4.08e-05	0.00135855	0.0693997	0.000740652	0.0142235	85.1594	59.9867	6.10859	3.9645	4.30106	0	retinal pigment epithelial membrane protein, expressed
LOC_Os08g30790.2	0.0598083	3.36e-06	0.000169301	0.125544	0.000394242	0.00866162	483.752	449.312	72.5395	44.6006	37.8493	17.9557	hypersensitive-induced response protein, putative, expressed
LOC_Os08g31090.1	0.180968	0.00132099	0.0224266	0.0602709	1.06e-06	6.74e-05	9225.6	10652.9	732.268	465.829	2590.96	1006.42	expressed protein
LOC_Os08g34900.1	0.175345	0.00105283	0.0187506	0.136932	0.000263473	0.00617403	4886.02	5830.47	769.683	697.752	883.437	995.643	pectinesterase, putative, expressed
LOC_Os08g34910.1	0.1796	0.00132479	0.0224456	0.146144	0.00043173	0.00924789	1887.7	2266.55	310.775	296.347	348.385	397.719	pectinesterase, putative, expressed
LOC_Os08g37660.1	0.122182	0.000104378	0.00295085	0.074173	4.46e-06	0.000218443	15533.3	17607.8	1466.06	992.117	2357.84	1691.43	plastocyanin-like domain containing protein, putative, expressed
LOC_Os08g37670.1	0.175447	0.00102006	0.0183067	0.164333	0.000820327	0.0154537	24604	29181.7	4972.39	3866.38	4913.53	4523.04	plastocyanin-like domain containing protein, putative, expressed
LOC_Os08g39330.1	0.0931262	1.55e-05	0.000615777	0.109114	5.35e-05	0.00166403	21573.7	22917.3	2387.7	2466.91	1747.09	2396.19	skin secretory protein xP2 precursor, putative, expressed
LOC_Os08g40490.1	0.0662564	0.00112927	0.0198736	0.0957078	0.00356923	0.048763	65.0523	52.9294	5.34502	5.94675	6.02148	1.79557	BTB/POZ domain containing protein, expressed
LOC_Os08g41560.1	0.0664108	0.000129848	0.00347549	0.0509406	6.1e-05	0.00185208	117.094	121.15	9.16289	2.97338	7.7419	8.08006	ubiquitin carboxyl-terminal hydrolase, putative, expressed
LOC_Os08g43120.1	0.0509585	2.4e-07	1.86e-05	0.142428	0.000382931	0.00846334	1751.68	2279.49	338.263	235.888	106.666	98.7563	Plant PDR ABC transporter associated domain containing protein, expressed
LOC_Os09g10640.1	0.011363	0.000248473	0.00595334	0.0193287	0.000662282	0.0130482	36.6658	42.3435	1.52715	0	0	0.897785	retrotransposon protein, putative, unclassified, expressed
LOC_Os09g13930.1	0.162497	0.00356238	0.0493524	0.0702832	7.81e-05	0.00226188	102.901	171.727	8.39931	10.9024	6.02148	38.6047	LTPL4 - Protease inhibitor/seed storage/LTP family protein precursor, expressed
LOC_Os09g14100.1	0	6.78e-07	4.43e-05	0.105918	0.0027524	0.0399245	80.4283	50.577	0	13.8758	0	0	disease resistance protein RPS2, putative, expressed
LOC_Os09g15250.1	0.0595272	0.000126315	0.00340602	0.0864934	0.000383326	0.00846635	131.287	63.5153	0	16.8491	1.72042	9.87563	retrotransposon protein, putative, unclassified, expressed
LOC_Os09g15560.1	0.0864779	0.0021562	0.0331609	0.0116531	1.28e-05	0.000508435	88.7077	42.3435	1.52715	0	7.7419	3.59114	OsFBX314 - F-box domain containing protein, expressed
LOC_Os09g15950.1	0.0460904	0.000138425	0.00365098	0.0763234	0.000575418	0.01156	102.901	52.9294	0	11.8935	0	7.18228	expressed protein
LOC_Os09g17146.1	0.174077	0.00169618	0.027372	0.021401	5.11e-09	7.45e-07	488.484	656.325	17.5622	6.93788	123.87	75.4139	expressed protein
LOC_Os09g17152.1	0.15521	0.000520995	0.0106609	0.025611	1.95e-09	3.28e-07	3801.42	4937.73	133.625	90.1924	784.512	571.889	OsFBX319 - F-box domain containing protein, expressed
LOC_Os09g19970.1	0.120313	0.000225216	0.00547641	0.0341033	1.23e-07	1.1e-05	403.324	610.452	23.6708	10.9024	85.1609	36.8092	expressed protein
LOC_Os09g20180.1	0.0378971	5.85e-05	0.00183555	0.0670338	0.000394158	0.00866162	63.8695	99.9778	3.0543	7.929	1.72042	4.48892	expressed protein
LOC_Os09g20260.1	0.0837525	3.82e-05	0.00128807	0.0195611	1.3e-08	1.65e-06	370.207	339.924	9.92646	3.9645	15.4838	43.9914	polyamine oxidase precursor, putative, expressed
LOC_Os09g20284.1	0.0755588	6.84e-05	0.00208273	0.0581212	2.09e-05	0.000770054	216.447	168.198	11.4536	10.9024	12.9032	16.1601	amine oxidase, flavin-containing, domain containing protein, expressed
LOC_Os09g23300.1	0.181031	0.00218608	0.0335258	0.128462	0.000433182	0.00926784	343.003	321.105	49.6323	35.6805	22.3655	97.8585	integral membrane protein, putative, expressed
LOC_Os09g24720.1	0	4.25e-05	0.00140504	0	4.4e-05	0.00142181	57.9557	1.17621	0	0	0	0	expressed protein
LOC_Os09g25860.1	0.114314	0.000120543	0.00327976	0.124037	0.000207743	0.00511795	676.544	750.421	77.8846	99.1125	67.9567	95.1652	expressed protein
LOC_Os09g26610.1	0.132197	0.000694169	0.0134502	0.0884132	0.000102866	0.00286465	188.06	324.634	27.4887	17.8403	30.9676	36.8092	OsSAUR38 - Auxin-responsive SAUR gene family member, expressed
LOC_Os09g31019.1	0.131546	0.00266396	0.039252	0.115574	0.00176457	0.0281589	65.0523	148.202	13.7443	10.9024	15.4838	12.569	ubiquitin fusion protein, putative, expressed
LOC_Os09g31080.1	0.202979	0.00241471	0.0364	0.17712	0.00120476	0.0208226	36430.5	45375.8	7538.77	6950.76	8663.19	7941.8	induced stolen tip protein TUB8, putative, expressed
LOC_Os09g31430.1	0.0614887	8.63e-07	5.47e-05	0.126295	0.000165358	0.00424099	3989.48	3796.8	558.173	425.193	261.504	217.264	Os9bglu30 - beta-glucosidase, similar to Os4bglu12 exoglucanase, expressed
LOC_Os09g35980.1	0.124565	0.000135789	0.00359331	0.182117	0.00141909	0.0237967	1691.36	2235.97	313.829	401.406	248.601	240.606	expressed protein
LOC_Os09g35980.2	0.111137	7.74e-05	0.00230402	0.158908	0.000731311	0.0140606	904.818	1106.81	141.261	178.403	102.365	121.201	expressed protein
LOC_Os09g36680.1	0.15175	0.000914981	0.0167897	0.0141467	8.77e-09	1.16e-06	118.277	97.6253	3.0543	0	30.9676	1.79557	ribonuclease T2 family domain containing protein, expressed
LOC_Os09g37820.1	0.0449377	6.94e-06	0.00031263	0.0317147	1.21e-06	7.49e-05	191.609	178.784	3.81787	7.929	9.46232	7.18228	transposon protein, putative, unclassified, expressed
LOC_Os09g38850.1	0.196022	0.00246615	0.0370047	0.098989	4.46e-05	0.00143572	904.818	977.43	93.156	93.1658	144.515	224.446	OsWAK91 - OsWAK receptor-like protein kinase, expressed
LOC_Os10g07229.1	0.117999	8.84e-05	0.00257162	0.163734	0.000874558	0.0162412	2915.53	3062.85	556.645	422.219	333.762	371.683	dehydrogenase, putative, expressed
LOC_Os10g21670.1	0.146469	0.000342728	0.00776208	0.153564	0.000549353	0.0111333	34772.2	35719.1	6196.4	4628.56	6775.88	3548.94	dehydration stress-induced protein, putative, expressed
LOC_Os10g21790.1	0.153757	0.000476227	0.00991943	0.141172	0.000305255	0.00704198	7970.68	9260.29	1246.15	1186.38	1643.86	1005.52	dehydration stress-induced protein, putative, expressed
LOC_Os10g31420.1	0.164634	0.000769396	0.0145766	0.0494849	2.4e-07	1.91e-05	7470.37	7761.8	430.656	323.107	1988.81	518.919	retrotransposon protein, putative, unclassified, expressed
LOC_Os10g31440.1	0.0431454	9.83e-07	5.97e-05	0.00860679	1.17e-10	3.24e-08	302.789	388.149	0	5.94675	16.344	13.4668	retrotransposon protein, putative, unclassified, expressed
LOC_Os10g31460.1	0.064218	1.42e-06	8.12e-05	0.0227501	6.46e-10	1.28e-07	4246.14	5020.06	100.792	110.015	517.847	77.2095	retrotransposon protein, putative, unclassified, expressed
LOC_Os10g31460.2	0.0856353	1.05e-05	0.00044186	0.0271438	2.16e-09	3.52e-07	6311.26	7478.34	174.095	200.207	1021.07	159.806	retrotransposon protein, putative, unclassified, expressed
LOC_Os10g31460.4	0.0698184	4.66e-06	0.000222635	0.0159675	1.87e-10	4.63e-08	1068.04	1005.66	15.2715	17.8403	117.849	26.9335	retrotransposon protein, putative, unclassified, expressed
LOC_Os10g31490.1	0.0276097	2.54e-08	2.73e-06	0.00760122	8.93e-12	4.11e-09	392.679	650.444	0	7.929	18.9246	9.87563	retrotransposon protein, putative, unclassified, expressed
LOC_Os10g33250.1	0.169206	0.00103225	0.0184647	0.137477	0.000327554	0.00744598	1308.14	1142.1	163.405	173.447	168.601	245.993	WAX2, putative, expressed
LOC_Os10g34884.1	0.0254813	9.96e-07	6.02e-05	0.122907	0.000791439	0.0150309	81.6111	198.779	0.763574	33.6983	0.860211	6.28449	RIPER7 - Ripening-related family protein precursor, expressed
LOC_Os10g36260.1	0.0337511	5.87e-05	0.00183665	0.111601	0.00360654	0.0491699	61.504	67.0439	8.39931	5.94675	3.44084	0.897785	expressed protein
LOC_Os10g38630.1	0.00958389	5.73e-07	3.86e-05	0.0828184	0.000399923	0.00875596	131.287	48.2246	0	14.8669	1.72042	0	glutathione S-transferase, putative, expressed
LOC_Os10g39160.1	0.112821	0.000523367	0.0106968	0.0758155	0.000116331	0.00317819	159.674	170.55	19.0894	5.94675	10.3225	26.9335	peroxidase precursor, putative, expressed
LOC_Os10g39170.1	0.197243	0.00204791	0.0318401	0.168352	0.000838011	0.0157144	14829.6	17580.8	2580.12	2876.25	3092.46	3300.26	peroxidase precursor, putative, expressed
LOC_Os10g40430.1	0.0399429	2.8e-08	2.95e-06	0.0648523	1.39e-06	8.36e-05	59203.5	69454	4215.69	4128.04	2136.76	3002.19	LTPL139 - Protease inhibitor/seed storage/LTP family protein precursor, expressed
LOC_Os10g40440.1	0.0436651	5.75e-08	5.45e-06	0.0475886	1.64e-07	1.38e-05	352003	400343	21133.4	14669.6	18202.1	14649.2	LTPL140 - Protease inhibitor/seed storage/LTP family protein precursor, expressed
LOC_Os10g40470.1	0.000840945	8.99e-21	9.79e-17	0.00308754	1.2e-16	4.88e-13	6062.87	7503.04	19.0894	22.7959	6.02148	5.38671	LTPL142 - Protease inhibitor/seed storage/LTP family protein precursor, putative, expressed
LOC_Os10g40480.1	0.0287438	2.17e-09	3.39e-07	0.0252357	1.28e-09	2.3e-07	46712.3	59346.8	1578.31	1098.17	1364.29	1684.24	LTPL143 - Protease inhibitor/seed storage/LTP family protein precursor, expressed
LOC_Os10g40510.1	0.182597	0.00128354	0.0219965	0.159264	0.000643156	0.0127175	62820.4	69596.3	11207.7	9881.52	11946.6	12232.3	LTPL144 - Protease inhibitor/seed storage/LTP family protein precursor, expressed
LOC_Os10g40520.1	0.0292325	0.000544213	0.0110332	0.0361237	0.00102407	0.0183803	50.8591	39.9911	2.29072	0.991125	0.860211	1.79557	LTPL145 - Protease inhibitor/seed storage/LTP family protein precursor, expressed
LOC_Os10g40530.1	0.0785294	4.44e-06	0.000215081	0.06294	1.13e-06	7.13e-05	229117	239543	15200.5	14297	14927.2	21876.3	LTPL146 - Protease inhibitor/seed storage/LTP family protein precursor, expressed
LOC_Os10g40550.1	0.191787	0.0018197	0.0289249	0.115337	9.33e-05	0.00264227	3710.35	3713.29	472.652	383.566	660.642	763.117	CPuORF23 - conserved peptide uORF-containing transcript, expressed
LOC_Os10g40640.1	0.156235	0.000546275	0.0110525	0.119341	0.000113751	0.00311988	2945.09	3289.86	383.314	360.77	472.256	501.862	glycosyl transferase 8 domain containing protein, putative, expressed
LOC_Os10g40720.1	0.104416	3.29e-05	0.00113719	0.146742	0.000410419	0.00890221	111113	117494	19177.9	14368.3	8471.36	15398.8	expansin precursor, putative, expressed
LOC_Os10g42900.1	0.174923	0.00109756	0.0194413	0.210739	0.00360609	0.0491699	3019.61	3749.75	770.446	656.125	700.212	483.906	peptide transporter PTR2, putative, expressed
LOC_Os11g02580.1	0.0218505	1.46e-07	1.21e-05	0.0366809	2.66e-06	0.000142252	198.705	207.013	9.92646	4.95563	2.58063	6.28449	esterase, putative, expressed
LOC_Os11g06100.1	0.0310697	0.00225632	0.0344574	0	0.000240202	0.00572314	28.3865	29.4052	0	0	0	1.79557	carrier, putative, expressed
LOC_Os11g10580.1	0.0823107	0.000603085	0.0119523	0.0915835	0.000921623	0.0169246	52.0418	32.9339	3.81787	3.9645	4.30106	2.69335	transposon protein, putative, CACTA, En/Spm sub-class, expressed
LOC_Os11g10590.1	0.113789	9.23e-05	0.00266661	0.127409	0.00020109	0.00498013	671.813	618.686	80.1753	84.2457	91.1824	55.6626	expressed protein
LOC_Os11g14070.1	0.0658541	1.43e-06	8.18e-05	0.0465032	1.27e-07	1.13e-05	5315.36	7399.53	274.123	317.16	418.063	419.265	expressed protein
LOC_Os11g19340.1	0.149866	0.00297803	0.0427802	0.0114161	8.28e-08	7.88e-06	98.1698	169.374	3.0543	0	27.5268	12.569	lipase, putative, expressed
LOC_Os11g20090.1	0.135832	0.000217264	0.00531467	0.128593	0.000196964	0.00489651	8485.18	7614.78	1267.53	802.812	1400.42	786.459	O-methyltransferase, putative, expressed
LOC_Os11g20239.1	0.00959546	6.64e-05	0.00203155	0.0723139	0.00308142	0.0436757	46.128	43.5197	1.52715	4.95563	0.860211	0	expressed protein
LOC_Os11g24180.1	0.103323	6.86e-05	0.00208577	0.126212	0.00026226	0.00615445	622.136	738.659	85.5203	86.2279	69.6771	70.925	OsSCP50 - Putative Serine Carboxypeptidase homologue, expressed
LOC_Os11g29840.1	0.115882	7.38e-05	0.00221578	0.142935	0.00035593	0.00795812	9002.05	9227.36	1466.83	1138.8	1131.18	981.278	expressed protein
LOC_Os11g33270.1	0.0595545	6.18e-07	4.08e-05	0.0623402	1.24e-06	7.58e-05	11432.6	13339.4	874.292	670.001	570.32	904.967	glycosyl hydrolases family 16, putative, expressed
LOC_Os11g35930.1	0.0369645	1.55e-08	1.77e-06	0.059641	7.3e-07	4.9e-05	168401	214099	11241.3	11571.4	6911.8	7227.17	chalcone synthase, putative, expressed
LOC_Os11g39000.1	0.0125771	3.7e-12	1.51e-09	0.0270261	2.16e-09	3.52e-07	11388.9	11855	329.864	298.329	192.687	99.6541	helix-loop-helix DNA-binding domain containing protein, expressed
LOC_Os11g39000.2	0.0172307	7.51e-11	1.93e-08	0.0346162	2.38e-08	2.72e-06	2441.24	3510.98	126.753	79.29	56.7739	45.787	helix-loop-helix DNA-binding domain containing protein, expressed
LOC_Os11g42989.1	0.0583945	0.00231495	0.0351883	0	1.79e-05	0.000678156	30.752	57.6342	0	0	5.16127	0	exo70 exocyst complex subunit, putative, expressed
LOC_Os11g43520.1	0.0646823	9.01e-06	0.000387937	0.103026	0.000167301	0.0042796	319.348	371.682	40.4694	30.7249	24.9461	19.7513	OsGrx_C17 - glutaredoxin subgroup III, expressed
LOC_Os11g46900.1	0.205502	0.00275095	0.0402975	0.150901	0.000554439	0.0112144	3267.99	3131.07	571.153	394.468	621.933	693.09	wall-associated receptor kinase 3 precursor, putative, expressed
LOC_Os11g47580.1	0.0556412	4.15e-07	2.93e-05	0.0116989	3.01e-12	1.67e-09	13530.9	19505.1	213.037	173.447	1450.32	387.843	glycosyl hydrolase, putative, expressed
LOC_Os12g02510.1	0.0322032	0.000858205	0.0159449	0.030974	0.000881237	0.016356	26.0209	55.2818	1.52715	0.991125	1.72042	0.897785	esterase, putative, expressed
LOC_Os12g04424.1	0.194871	0.00218791	0.0335344	0.12688	0.000176202	0.00447576	1338.89	2017.2	210.746	215.074	360.428	293.576	strictosidine synthase, putative, expressed
LOC_Os12g05440.1	0.182758	0.00150566	0.0249526	0.00486482	1.36e-14	2.47e-11	1836.84	2287.73	9.16289	10.9024	418.923	334.874	cytochrome P450, putative, expressed
LOC_Os12g06660.1	0.0476346	1.07e-07	9.24e-06	0.076325	4.82e-06	0.000232916	37599	43128.1	3316.97	2844.53	1352.25	2493.15	actin, putative, expressed
LOC_Os12g08920.1	0.120531	9.1e-05	0.00263768	0.116282	8.35e-05	0.00240067	22486.8	22695	2651.13	2602.7	2387.95	3057.85	peroxidase precursor, putative, expressed
LOC_Os12g12260.2	0.0821088	0.000128599	0.00345307	0.0520807	1.53e-05	0.000590493	154.943	177.608	8.39931	8.92013	12.043	15.2623	diacylglycerol kinase 1, putative, expressed
LOC_Os12g22600.1	0.191995	0.00302316	0.0432573	0.16626	0.00175416	0.0280203	339.455	458.722	80.1753	52.5297	67.9567	85.2895	tRNA synthetases class II domain containing protein, expressed
LOC_Os12g25090.1	0.138683	0.000306901	0.00708823	0.0653292	2.28e-06	0.00012627	645.792	985.663	48.1052	58.4764	123.01	103.245	expressed protein
LOC_Os12g29750.1	0.123051	0.00344405	0.0480389	0.0124567	2.05e-06	0.000116265	73.3317	110.564	2.29072	0	16.344	6.28449	protein of unknown function DUF502 domain containing protein, expressed
LOC_Os12g35330.1	0.00914361	9.65e-12	3.58e-09	0.0327283	4.21e-08	4.4e-06	683.64	833.932	22.9072	26.7604	11.1827	2.69335	OsGrx_C12 - glutaredoxin subgroup III, expressed
LOC_Os12g36240.1	0.0461504	2.47e-07	1.91e-05	0.165121	0.000779713	0.01486	184.512	462.25	37.4151	69.3788	15.4838	14.3646	inhibitor I family protein, putative, expressed
LOC_Os12g36810.1	0.182607	0.0013198	0.0224183	0.173163	0.00103578	0.0185652	8513.57	9160.32	1500.42	1560.03	1586.23	1641.15	polygalacturonase, putative, expressed
LOC_Os12g36880.1	0.155877	0.000873637	0.0161856	0.0393879	2.22e-07	1.79e-05	476.656	329.339	19.8529	11.8935	83.4405	42.1959	pathogenesis-related Bet v I family protein, putative, expressed
LOC_Os12g40730.1	0.0303987	3.16e-05	0.00109737	0.0248057	1.89e-05	0.000708359	95.8043	76.4536	2.29072	1.98225	3.44084	1.79557	helix-loop-helix DNA-binding domain containing protein, expressed
LOC_Os12g40900.1	0.143746	0.000288577	0.00675571	0.1497	0.000422453	0.0090968	13015.2	13328.8	1945.59	1998.11	1480.42	2306.41	OsIAA31 - Auxin-responsive Aux/IAA gene family member, expressed
LOC_Os12g41110.1	0.132246	0.000290482	0.00678932	0.17687	0.00213412	0.0327445	626.868	724.545	155.769	83.2545	80.8598	97.8585	OsCML5 - Calmodulin-related calcium sensor protein, expressed
LOC_Os12g41410.1	0.151959	0.00178563	0.0285499	0.0272385	1.93e-07	1.59e-05	257.844	221.127	6.10859	6.93788	60.2148	12.569	receptor-like protein kinase homolog RK20-1, putative, expressed
LOC_Os12g44270.1	0.00313754	4.96e-14	4.38e-11	0.00760626	7.99e-12	3.78e-09	600.847	793.941	7.63574	2.97338	2.58063	1.79557	glycine-rich protein, putative, expressed
ChrUn.fgenesh.mRNA.21	0.0769997	6.84e-06	0.00030937	0.0593445	1.24e-06	7.58e-05	1429.97	1440.86	80.1753	90.1924	139.354	81.6984
ChrUn.fgenesh.mRNA.70	0.0604767	2.4e-06	0.000126253	0.0415538	2.02e-07	1.64e-05	719.124	679.849	24.4344	33.6983	56.7739	27.8313
ChrUn.fgenesh.mRNA.95	0.0593044	4.66e-06	0.000222635	0.0451476	1.24e-06	7.58e-05	425.797	366.977	22.9072	12.8846	33.5482	13.4668
