# Supplementary material for: Comparative Transcriptional Profiling of Primed and Non-primed Rice Seedlings under Submergence Stress
Source: Front Plant Sci. 2016 Jul 28;7:1125. doi: 10.3389/fpls.2016.01125 (PMC4964843; doi:10.3389/fpls.2016.01125)
Supplement: Table S5 — List of DETs associated with development pathway in NP+Cn (A), Se+Sub (B), and SA+Sub (C) treatments. Based on pathway enrichment analysis by Mapman, a total of 131, 93, and 95 development-related genes were overrepresented in NP+Cn, Se+Sub, and SA+Sub treatments respectively, compared with NP+Sub. [file DataSheet5.XLS]

## Sheet: NP+Cn vs NP+Sub
Table S5-A: List of DETs associated with development pathway in NP+Cn.
BinCode	BinName	Gene ID	Type	Description	Mapman_NP+Control vs NP+Sub
33.1	development.storage proteins	loc_os07g05110.1	Transcript	moderately similar to ( 247) AT3G54950 | Symbols: PLP7, PLA IIIA | PLA IIIA (PATATIN-LIKE PROTEIN 6) | chr3:20359076-20360774 REVERSE protein|PLA IIIA/PLP7, putative, expressed	3.39495
33.1	development.storage proteins	loc_os03g57080.1	Transcript	moderately similar to ( 284) AT2G39220 | Symbols: PLP6, PLA IIB | PLP6 (PATATIN-LIKE PROTEIN 6); nutrient reservoir | chr2:16375055-16376663 REVERSE protein|PLA IIIA/PLP7, putative, expressed	4.17166
33.1	development.storage proteins	loc_os11g39990.1	Transcript	moderately similar to ( 397) AT2G26560 | Symbols: PLP2, PLA IIA, PLA2A | PLA2A (PHOSPHOLIPASE A 2A); lipase/ nutrient reservoir | chr2:11293912-11295708 REVERSEmoderately similar to ( 246) PAT5_SOLTU Patatin T5 precursor (Potato tuber protein) - Solanum tuberosum (Potato) Patatin COG3621 protein|patatin, putative, expressed	5.37964
33.1	development.storage proteins	loc_os08g37250.1	Transcript	moderately similar to ( 305) AT2G26560 | Symbols: PLP2, PLA IIA, PLA2A | PLA2A (PHOSPHOLIPASE A 2A); lipase/ nutrient reservoir | chr2:11293912-11295708 REVERSEmoderately similar to ( 209) PAT5_SOLTU Patatin T5 precursor (Potato tuber protein) - Solanum tuberosum (Potato) Patatin protein|patatin, putative, expressed	12.0918
33.1	development.storage proteins	loc_os06g46350.1	Transcript	moderately similar to ( 202) AT3G54950 | Symbols: PLP7, PLA IIIA | PLA IIIA (PATATIN-LIKE PROTEIN 6) | chr3:20359076-20360774 REVERSE protein|PLA IIIA/PLP7, putative, expressed	2.36842
33.1	development.storage proteins	loc_os09g37976.1	Transcript	weakly similar to ( 172) AT1G07750 | Symbols: | cupin family protein | chr1:2404300-2405863 REVERSE protein|cupin domain containing protein, expressed	12.0918
33.1	development.storage proteins	loc_os11g40009.1	Transcript	moderately similar to ( 255) AT2G26560 | Symbols: PLP2, PLA IIA, PLA2A | PLA2A (PHOSPHOLIPASE A 2A); lipase/ nutrient reservoir | chr2:11293912-11295708 REVERSEweakly similar to ( 162) PAT5_SOLTU Patatin T5 precursor (Potato tuber protein) - Solanum tuberosum (Potato) Patatin COG3621 protein|phospholipase, patatin family, putative, expressed	12.0918
33.2	development.late embryogenesis abundant	loc_os01g59680.1	Transcript	weakly similar to ( 115) AT2G27080 | Symbols: | harpin-induced protein-related / HIN1-related / harpin-responsive protein-related | chr2:11566383-11567165 FORWARDHin1 protein|NHL25, putative, expressed	-5.22142
33.2	development.late embryogenesis abundant	loc_os01g73700.1	Transcript	moderately similar to ( 270) AT3G19430 | Symbols: | late embryogenesis abundant protein-related / LEA protein-related | chr3:6736382-6738330 REVERSERoot_cap protein|RCLEA2 - Root cap and Late embryogenesis related family protein precursor, putative, expressed	12.0918
33.2	development.late embryogenesis abundant	loc_os03g06360.1	Transcript	weakly similar to ( 129) AT3G22490 | Symbols: | late embryogenesis abundant protein, putative / LEA protein, putative | chr3:7969785-7970738 REVERSEweakly similar to ( 144) LEA34_GOSHI Late embryogenesis abundant protein D-34 (LEA D-34) - Gossypium hirsutum (Upland cotton) protein|late embryogenesis abundant protein D-34, putative, expressed	3.2195
33.2	development.late embryogenesis abundant	loc_os12g06220.1	Transcript	Hin1 protein|harpin-induced protein 1 domain containing protein, expressed	-2.40951
33.2	development.late embryogenesis abundant	loc_os08g23870.1	Transcript	protein|late embryogenesis abundant group 1, putative, expressed	12.0918
33.2	development.late embryogenesis abundant	loc_os03g20680.1	Transcript	protein|late embryogenesis abundant protein 1, putative, expressed	5.47453
33.2	development.late embryogenesis abundant	loc_os07g34720.1	Transcript	weakly similar to ( 159) AT4G05220 | Symbols: | harpin-induced protein-related / HIN1-related / harpin-responsive protein-related | chr4:2685104-2685784 REVERSEHin1 protein|harpin-induced protein 1 domain containing protein, expressed	-2.95988
33.2	development.late embryogenesis abundant	loc_os05g11010.1	Transcript	very weakly similar to (86.7) AT1G17620 | Symbols: | FUNCTIONS IN: molecular_function unknown; INVOLVED IN: biological_process unknown; LOCATED IN: plasma membrane; EXPRESSED IN: 23 plant structures; EXPRESSED DURING: 13 growth stages; CONTAINS InterPro DOMAIN/s: Harpin-induced 1 (InterPro:IPR010847); BEST Arabidopsis thaliana protein match is: unknown protein (TAIR:AT5G11890.1); Has 539 Blast hi…	-2.45893
33.2	development.late embryogenesis abundant	loc_os07g34040.1	Transcript	protein|harpin-induced protein 1 domain containing protein, expressed	12.0918
33.3	development.squamosa promoter binding like (SPL)	loc_os04g56170.1	Transcript	weakly similar to ( 138) AT1G02065 | Symbols: SPL8 | SPL8 (SQUAMOSA PROMOTER BINDING PROTEIN-LIKE 8); DNA binding | chr1:365625-367149 FORWARDmoderately similar to ( 379) LG1_MAIZE LIGULELESS1 protein - Zea mays (Maize)SBP protein|OsSPL8 - SBP-box gene family member, expressed	6.86061
33.3	development.squamosa promoter binding like (SPL)	loc_os01g69830.1	Transcript	weakly similar to ( 112) AT5G50570 | Symbols: | squamosa promoter-binding protein, putative | chr5:20582555-20583791 REVERSEvery weakly similar to (84.7) SBP2_ANTMA Squamosa promoter-binding protein 2 - Antirrhinum majus (Garden snapdragon)SBP protein|OsSPL2 - SBP-box gene family member, expressed	2.3152
33.3	development.squamosa promoter binding like (SPL)	loc_os02g08070.1	Transcript	weakly similar to ( 123) AT1G02065 | Symbols: SPL8 | SPL8 (SQUAMOSA PROMOTER BINDING PROTEIN-LIKE 8); DNA binding | chr1:365625-367149 FORWARDweakly similar to ( 115) LG1_MAIZE LIGULELESS1 protein - Zea mays (Maize)SBP protein|OsSPL5 - SBP-box gene family member, expressed	12.0918
33.3	development.squamosa promoter binding like (SPL)	loc_os09g32944.1	Transcript	weakly similar to ( 138) AT5G50570 | Symbols: | squamosa promoter-binding protein, putative | chr5:20582555-20583791 REVERSEweakly similar to ( 116) LG1_MAIZE LIGULELESS1 protein - Zea mays (Maize)SBP protein|OsSPL18 - SBP-box gene family member, expressed	4.14472
33.3	development.squamosa promoter binding like (SPL)	loc_os07g32170.1	Transcript	weakly similar to ( 120) AT3G60030 | Symbols: SPL12 | SPL12 (squamosa promoter-binding protein-like 12); transcription factor | chr3:22165856-22169410 REVERSEweakly similar to ( 114) LG1_MAIZE LIGULELESS1 protein - Zea mays (Maize)SBP protein|OsSPL13 - SBP-box gene family member, expressed	3.67965
33.3	development.squamosa promoter binding like (SPL)	loc_os06g44860.1	Transcript	weakly similar to ( 151) AT1G02065 | Symbols: SPL8 | SPL8 (SQUAMOSA PROMOTER BINDING PROTEIN-LIKE 8); DNA binding | chr1:365625-367149 FORWARDweakly similar to ( 131) LG1_MAIZE LIGULELESS1 protein - Zea mays (Maize)SBP protein|OsSPL10 - SBP-box gene family member, expressed	7.05838
33.99	development.unspecified	loc_os02g50174.1	Transcript	weakly similar to ( 169) AT1G70680 | Symbols: | caleosin-related family protein | chr1:26647341-26648541 FORWARDCaleosin protein|caleosin related protein, putative, expressed	-2.57736
33.99	development.unspecified	loc_os03g07940.1	Transcript	moderately similar to ( 250) AT1G72570 | Symbols: | DNA binding / transcription factor | chr1:27331381-27333698 FORWARDmoderately similar to ( 229) BBM2_BRANA Protein BABY BOOM 2 (BnBBM2) - Brassica napus (Rape)AP2 protein|AP2 domain containing protein, expressed	12.0918
33.99	development.unspecified	loc_os01g01470.1	Transcript	moderately similar to ( 241) AT5G18270 | Symbols: ANAC087 | ANAC087; transcription factor | chr5:6041241-6042743 REVERSEmoderately similar to ( 206) NAC77_ORYSA NAC domain-containing protein 77 (ONAC077) (ONAC300) - Oryza sativa (Rice)NAM protein|no apical meristem protein, putative, expressed	12.0918
33.99	development.unspecified	loc_os03g56580.1	Transcript	moderately similar to ( 253) AT2G43000 | Symbols: anac042 | anac042 (Arabidopsis NAC domain containing protein 42); transcription factor | chr2:17880617-17882584 REVERSEweakly similar to ( 179) NAC68_ORYSA NAC domain-containing protein 68 (ONAC068) - Oryza sativa (Rice)NAM protein|no apical meristem protein, putative, expressed	5.79527
33.99	development.unspecified	loc_os02g52930.1	Transcript	moderately similar to ( 332) AT1G21890 | Symbols: | nodulin MtN21 family protein | chr1:7682808-7685581 REVERSE protein|integral membrane protein DUF6 containing protein, expressed	12.0918
33.99	development.unspecified	loc_os06g01972.1	Transcript	moderately similar to ( 210) AT4G01440 | Symbols: | nodulin MtN21 family protein | chr4:596531-598512 FORWARD protein|auxin-induced protein 5NG4, putative, expressed	5.26417
33.99	development.unspecified	loc_os10g28680.1	Transcript	very weakly similar to (81.3) AT2G25690 | Symbols: | senescence-associated protein-related | chr2:10940530-10941649 REVERSE protein|DUF581 domain containing protein, expressed	4.66352
33.99	development.unspecified	loc_os08g42350.1	Transcript	weakly similar to ( 184) AT5G50790 | Symbols: | nodulin MtN3 family protein | chr5:20656461-20657827 REVERSE MtN3_slv protein|nodulin MtN3 family protein, putative, expressed	4.8004
33.99	development.unspecified	loc_os06g01660.1	Transcript	moderately similar to ( 206) AT5G47470 | Symbols: | nodulin MtN21 family protein | chr5:19254598-19256378 FORWARD protein|integral membrane protein DUF6 domain containing protein, expressed	3.72352
33.99	development.unspecified	loc_os02g22680.1	Transcript	weakly similar to ( 146) AT1G75500 | Symbols: | nodulin MtN21 family protein | chr1:28338282-28340091 REVERSE protein|integral membrane protein DUF6 containing protein, expressed	-4.18588
33.99	development.unspecified	loc_os05g39800.1	Transcript	moderately similar to ( 296) AT2G30300 | Symbols: | nodulin-related | chr2:12919401-12921222 FORWARDNodulin-like protein|NFD4, putative, expressed	12.0918
33.99	development.unspecified	loc_os11g31190.1	Transcript	moderately similar to ( 249) AT5G23660 | Symbols: MTN3 | MTN3 (Arabidopsis homolog of Medicago truncatula MTN3) | chr5:7971936-7973796 REVERSE MtN3_slv protein|nodulin MtN3 family protein, putative, expressed	3.50423
33.99	development.unspecified	loc_os04g51110.2	Transcript	highly similar to ( 620) AT4G33270 | Symbols: CDC20.1 | CDC20.1; signal transducer | chr4:16044545-16046590 REVERSE WD40 COG2319 protein|WD repeat-containing protein, putative, expressed	3.60939
33.99	development.unspecified	loc_os01g50460.1	Transcript	moderately similar to ( 223) AT3G14770 | Symbols: | nodulin MtN3 family protein | chr3:4957787-4959202 REVERSE protein|nodulin MtN3 family protein, putative, expressed	3.13907
33.99	development.unspecified	loc_os04g45520.1	Transcript	weakly similar to ( 148) AT3G43630 | Symbols: | nodulin, putative | chr3:15538816-15539418 FORWARDweakly similar to ( 117) NO21_SOYBN Nodulin 21 (N-21) - Glycine max (Soybean) Nodulin-21 Nodulin-21_like_1 DUF125 Nodulin-21_like_2 protein|integral membrane protein, putative, expressed	-3.05497
33.99	development.unspecified	loc_os08g43410.1	Transcript	weakly similar to ( 155) AT3G51060 | Symbols: STY1, SRS1 | STY1 (STYLISH 1); protein heterodimerization/ transcription factor | chr3:18964606-18966130 FORWARDDUF702 protein|LRP1, putative, expressed	4.49619
33.99	development.unspecified	loc_os12g44060.1	Transcript	moderately similar to ( 469) AT2G28120 | Symbols: | nodulin family protein | chr2:11985934-11987667 FORWARDNodulin-like protein|nodulin, putative, expressed	-2.08426
33.99	development.unspecified	loc_os01g42090.1	Transcript	moderately similar to ( 239) AT5G62850 | Symbols: AtVEX1 | AtVEX1 (VEGETATIVE CELL EXPRESSED1) | chr5:25230204-25231527 REVERSE MtN3_slv protein|nodulin MtN3 family protein, putative, expressed	3.95442
33.99	development.unspecified	loc_os12g03050.1	Transcript	moderately similar to ( 219) AT5G18270 | Symbols: ANAC087 | ANAC087; transcription factor | chr5:6041241-6042743 REVERSEhighly similar to ( 637) NAC77_ORYSA NAC domain-containing protein 77 (ONAC077) (ONAC300) - Oryza sativa (Rice)NAM protein|no apical meristem protein, putative, expressed	-2.54254
33.99	development.unspecified	loc_os05g10620.1	Transcript	moderately similar to ( 245) AT4G29230 | Symbols: anac075 | anac075 (Arabidopsis NAC domain containing protein 75); transcription factor | chr4:14410338-14414956 FORWARDNAM protein|no apical meristem protein, putative, expressed	-2.24121
33.99	development.unspecified	loc_os03g22200.1	Transcript	weakly similar to ( 186) AT4G15920 | Symbols: | INVOLVED IN: biological_process unknown; LOCATED IN: endomembrane system, integral to membrane, membrane; EXPRESSED IN: 23 plant structures; EXPRESSED DURING: 13 growth stages; CONTAINS InterPro DOMAIN/s: MtN3 and saliva related transmembrane protein, conserved region (InterPro:IPR018169), RAG1-activating protein 1 homologue (InterPro:IPR018179), Mt…	3.99323
33.99	development.unspecified	loc_os09g32260.1	Transcript	moderately similar to ( 259) AT2G24430 | Symbols: ANAC039 | ANAC038 (ARABIDOPSIS NAC DOMAIN CONTAINING PROTEIN 38); transcription factor | chr2:10383517-10386386 REVERSEmoderately similar to ( 215) NAC77_ORYSA NAC domain-containing protein 77 (ONAC077) (ONAC300) - Oryza sativa (Rice)NAM protein|no apical meristem protein, putative, expressed	12.0918
33.99	development.unspecified	loc_os06g51310.1	Transcript	nearly identical (1368) AT1G48410 | Symbols: AGO1 | AGO1 (ARGONAUTE 1); endoribonuclease/ miRNA binding / protein binding / siRNA binding | chr1:17886285-17891892 REVERSE Piwi_ago-like Piwi Piwi_piwi-like_Euk Piwi-like PAZ PAZ_argonaute_like DUF1785 protein|PAZ domain containing protein, putative, expressed	5.30049
33.99	development.unspecified	loc_os02g56600.1	Transcript	moderately similar to ( 236) AT4G28530 | Symbols: anac074 | anac074 (Arabidopsis NAC domain containing protein 74); transcription factor | chr4:14090725-14094603 REVERSEweakly similar to ( 179) NAC77_ORYSA NAC domain-containing protein 77 (ONAC077) (ONAC300) - Oryza sativa (Rice)NAM protein|no apical meristem protein, putative, expressed	7.96898
33.99	development.unspecified	loc_os01g12810.1	Transcript	moderately similar to ( 476) AT5G21222 | Symbols: | protein kinase family protein | chr5:7209422-7213700 FORWARDweakly similar to ( 184) RF1_ORYSA Rf1 protein, mitochondrial precursor (PPR protein) (Fertility restorer) (Restorer for CMS) - Oryza sativa (Rice) protein|retrotransposon protein, putative, unclassified, expressed	-2.55871
33.99	development.unspecified	loc_os01g51870.1	Transcript	moderately similar to ( 254) AT5G10830 | Symbols: | embryo-abundant protein-related | chr5:3423731-3424649 FORWARD protein|methyltransferase, putative, expressed	2.48312
33.99	development.unspecified	loc_os03g58580.1	Transcript	highly similar to ( 657) AT2G39210 | Symbols: | nodulin family protein | chr2:16366287-16368231 REVERSENodulin-like protein|nodulin, putative, expressed	3.20415
33.99	development.unspecified	loc_os04g59020.1	Transcript	weakly similar to ( 124) AT3G43660 | Symbols: | nodulin, putative | chr3:15565332-15565928 FORWARDweakly similar to ( 104) NO21_SOYBN Nodulin 21 (N-21) - Glycine max (Soybean) Nodulin-21_like_1 Nodulin-21 DUF125 Nodulin-21_like_2 protein|integral membrane protein, putative, expressed	4.80276
33.99	development.unspecified	loc_os04g29550.1	Transcript	moderately similar to ( 260) RIP1_ORYSA Putative ripening-related protein 1 precursor - Oryza sativa (Rice) protein|RIPER2 - Ripening-related family protein precursor, expressed	12.0918
33.99	development.unspecified	loc_os03g18120.1	Transcript	moderately similar to ( 444) AT5G01360 | Symbols: | EXPRESSED IN: 13 plant structures; EXPRESSED DURING: 4 anthesis, petal differentiation and expansion stage; CONTAINS InterPro DOMAIN/s: Protein of unknown function DUF231, plant (InterPro:IPR004253); BEST Arabidopsis thaliana protein match is: ESK1 (ESKIMO 1) (TAIR:AT3G55990.1); Has 688 Blast hits to 680 proteins in 18 species: Archae - 0; Bacte…	3.97478
33.99	development.unspecified	loc_os04g51110.1	Transcript	highly similar to ( 612) AT4G33270 | Symbols: CDC20.1 | CDC20.1; signal transducer | chr4:16044545-16046590 REVERSE WD40 COG2319 protein|WD repeat-containing protein, putative, expressed	3.31783
33.99	development.unspecified	loc_os03g21060.1	Transcript	moderately similar to ( 257) AT1G69490 | Symbols: NAP, ANAC029, ATNAP | NAP (NAC-like, activated by AP3/PI); transcription factor | chr1:26122233-26123222 FORWARDmoderately similar to ( 221) NAC68_ORYSA NAC domain-containing protein 68 (ONAC068) - Oryza sativa (Rice)NAM protein|No apical meristem protein, putative, expressed	2.85915
33.99	development.unspecified	loc_os04g42720.1	Transcript	moderately similar to ( 410) AT2G33205 | Symbols: | FUNCTIONS IN: molecular_function unknown; INVOLVED IN: biological_process unknown; LOCATED IN: membrane; CONTAINS InterPro DOMAIN/s: TMS membrane protein/tumour differentially expressed protein (InterPro:IPR005016); BEST Arabidopsis thaliana protein match is: MEE55 (maternal effect embryo arrest 55) (TAIR:AT4G13345.1); Has 602 Blast hits to 593 …	4.23372
33.99	development.unspecified	loc_os03g60340.1	Transcript	moderately similar to ( 411) AT2G40320 | Symbols: | unknown protein | chr2:16840330-16842139 FORWARDDUF231 protein|leaf senescence related protein, putative, expressed	3.21993
33.99	development.unspecified	loc_os09g25810.2	Transcript	moderately similar to ( 306) AT4G30420 | Symbols: | nodulin MtN21 family protein | chr4:14877069-14878914 FORWARD protein|nodulin, putative, expressed	3.72816
33.99	development.unspecified	loc_os02g02310.1	Transcript	moderately similar to ( 399) AT1G75500 | Symbols: | nodulin MtN21 family protein | chr1:28338282-28340091 REVERSE protein|auxin-induced protein 5NG4, putative, expressed	12.0918
33.99	development.unspecified	loc_os01g36070.1	Transcript	moderately similar to ( 206) AT3G14770 | Symbols: | nodulin MtN3 family protein | chr3:4957787-4959202 REVERSE protein|nodulin MtN3 family protein, putative, expressed	-2.74767
33.99	development.unspecified	loc_os03g06970.1	Transcript	moderately similar to ( 278) AT5G48850 | Symbols: ATSDI1 | ATSDI1 (SULPHUR DEFICIENCY-INDUCED 1); binding | chr5:19805576-19807699 REVERSE protein|tetratricopeptide repeat domain containing protein, expressed	-3.97172
33.99	development.unspecified	loc_os07g34320.1	Transcript	weakly similar to ( 171) AT5G64700 | Symbols: | nodulin MtN21 family protein | chr5:25865190-25866845 REVERSE protein|nodulin, putative, expressed	12.0918
33.99	development.unspecified	loc_os06g10750.1	Transcript	moderately similar to ( 337) AT1G21890 | Symbols: | nodulin MtN21 family protein | chr1:7682808-7685581 REVERSE protein|integral membrane protein DUF6 containing protein, expressed	11.113
33.99	development.unspecified	loc_os05g33900.1	Transcript	moderately similar to ( 437) AT5G07050 | Symbols: | LOCATED IN: membrane; CONTAINS InterPro DOMAIN/s: Protein of unknown function DUF6, transmembrane (InterPro:IPR000620); BEST Arabidopsis thaliana protein match is: nodulin MtN21 family protein (TAIR:AT2G40900.1); Has 2288 Blast hits to 2270 proteins in 280 species: Archae - 23; Bacteria - 774; Metazoa - 5; Fungi - 0; Plants - 641; Viruses - 0; O…	12.0918
33.99	development.unspecified	loc_os02g47180.2	Transcript	highly similar to ( 599) AT4G33270 | Symbols: CDC20.1 | CDC20.1; signal transducer | chr4:16044545-16046590 REVERSE WD40 COG2319 protein|WD repeat-containing protein, putative, expressed	3.55136
33.99	development.unspecified	loc_os08g40030.1	Transcript	moderately similar to ( 249) AT1G76420 | Symbols: CUC3, NAC368, ANAC031 | CUC3 (CUP SHAPED COTYLEDON3); transcription factor | chr1:28672029-28673835 REVERSEweakly similar to ( 195) NAC77_ORYSA NAC domain-containing protein 77 (ONAC077) (ONAC300) - Oryza sativa (Rice)NAM protein|CUP-SHAPED COTYLEDON3, putative, expressed	12.0918
33.99	development.unspecified	loc_os01g10990.1	Transcript	moderately similar to ( 247) AT5G64700 | Symbols: | nodulin MtN21 family protein | chr5:25865190-25866845 REVERSE protein|integral membrane protein DUF6 containing protein, expressed	12.0918
33.99	development.unspecified	loc_os07g34070.1	Transcript	moderately similar to ( 229) AT5G64700 | Symbols: | nodulin MtN21 family protein | chr5:25865190-25866845 REVERSE protein|auxin-induced protein 5NG4, putative, expressed	4.10288
33.99	development.unspecified	loc_os05g10620.2	Transcript	moderately similar to ( 240) AT4G29230 | Symbols: anac075 | anac075 (Arabidopsis NAC domain containing protein 75); transcription factor | chr4:14410338-14414956 FORWARDNAM protein|no apical meristem protein, putative, expressed	-2.50239
33.99	development.unspecified	loc_os02g47180.1	Transcript	highly similar to ( 599) AT4G33270 | Symbols: CDC20.1 | CDC20.1; signal transducer | chr4:16044545-16046590 REVERSE WD40 COG2319 protein|WD repeat-containing protein, putative, expressed	4.03076
33.99	development.unspecified	loc_os04g17660.1	Transcript	weakly similar to ( 111) AT5G66040 | Symbols: STR16 | STR16 (SULFURTRANSFERASE PROTEIN 16) | chr5:26410557-26411139 FORWARDweakly similar to ( 102) DIN1_RAPSA Senescence-associated protein DIN1 - Raphanus sativus (Radish) RHOD protein|rhodanese-like domain containing protein, putative, expressed	-5.1439
33.99	development.unspecified	loc_os05g28830.1	Transcript	moderately similar to ( 452) AT2G40320 | Symbols: | unknown protein | chr2:16840330-16842139 FORWARDDUF231 protein|PMR5, putative, expressed	4.35772
33.99	development.unspecified	loc_os04g43200.1	Transcript	moderately similar to ( 315) AT2G33380 | Symbols: RD20 | RD20 (RESPONSIVE TO DESSICATION 20); calcium ion binding | chr2:14144984-14146374 REVERSECaleosin protein|caleosin related protein, putative, expressed	3.18928
33.99	development.unspecified	loc_os07g41340.1	Transcript	weakly similar to ( 117) AT3G29970 | Symbols: | germination protein-related | chr3:11745299-11746481 FORWARDB12D protein|B12D protein, putative, expressed	-8.78571
33.99	development.unspecified	loc_os08g42400.2	Transcript	weakly similar to ( 102) AT5G13180 | Symbols: ANAC083 | ANAC083 (ARABIDOPSIS NAC DOMAIN CONTAINING PROTEIN 83); transcription factor | chr5:4196643-4197577 FORWARDvery weakly similar to (89.0) NAC68_ORYSA NAC domain-containing protein 68 (ONAC068) - Oryza sativa (Rice)NAM protein|no apical meristem protein, putative, expressed	3.17138
33.99	development.unspecified	loc_os05g35140.1	Transcript	moderately similar to ( 259) AT1G21460 | Symbols: | nodulin MtN3 family protein | chr1:7512030-7513281 REVERSE MtN3_slv protein|nodulin MtN3 family protein, putative, expressed	12.0918
33.99	development.unspecified	loc_os05g48850.1	Transcript	moderately similar to ( 332) AT4G28500 | Symbols: ANAC073, SND2 | ANAC073 (ARABIDOPSIS NAC DOMAIN CONTAINING PROTEIN 73); transcription activator/ transcription factor | chr4:14083014-14084266 FORWARDNAM protein|no apical meristem protein, putative, expressed	4.48597
33.99	development.unspecified	loc_os03g47810.1	Transcript	highly similar to ( 523) AT2G28120 | Symbols: | nodulin family protein | chr2:11985934-11987667 FORWARDNodulin-like protein|nodulin family protein, putative, expressed	12.0918
33.99	development.unspecified	loc_os03g05530.1	Transcript	moderately similar to ( 230) AT2G39510 | Symbols: | nodulin MtN21 family protein | chr2:16491358-16493085 REVERSE protein|nodulin, putative, expressed	5.37657
33.99	development.unspecified	loc_os02g30910.1	Transcript	moderately similar to ( 261) AT3G48740 | Symbols: | nodulin MtN3 family protein | chr3:18052814-18054663 REVERSE MtN3_slv protein|nodulin MtN3 family protein, putative, expressed	12.0918
33.99	development.unspecified	loc_os06g30370.1	Transcript	moderately similar to ( 204) AT1G18100 | Symbols: E12A11 | E12A11; phosphatidylethanolamine binding | chr1:6228049-6230110 REVERSEweakly similar to ( 148) CEN_ANTMA Protein CENTRORADIALIS - Antirrhinum majus (Garden snapdragon) RKIP PBP PEBP_RKIP protein|osMFT1 MFT-Like1 homologous to Mother of FT and TFL1 gene; contains Pfam profile PF01161: Phosphatidylethanolamine-binding protein, expressed	12.0918
33.99	development.unspecified	loc_os03g24040.1	Transcript	moderately similar to ( 468) AT3G61790 | Symbols: | seven in absentia (SINA) family protein | chr3:22871974-22873543 REVERSEweakly similar to ( 149) SINAL_DROME Probable E3 ubiquitin-protein ligase sina-like CG13030 (EC 6.3.2.-) - Drosophila melanogaster (Fruit fly) Sina Sina protein|seven in absentia protein family domain containing protein, expressed	2.5106
33.99	development.unspecified	loc_os01g06560.1	Transcript	very weakly similar to (98.6) AT4G18690 | Symbols: | unknown protein | chr4:10282788-10283636 FORWARD protein|transcription factor HBP-1b, putative, expressed	-6.74758
33.99	development.unspecified	loc_os01g48130.1	Transcript	moderately similar to ( 351) AT4G28500 | Symbols: ANAC073, SND2 | ANAC073 (ARABIDOPSIS NAC DOMAIN CONTAINING PROTEIN 73); transcription activator/ transcription factor | chr4:14083014-14084266 FORWARDNAM protein|no apical meristem protein, putative, expressed	3.69071
33.99	development.unspecified	loc_os07g46560.1	Transcript	moderately similar to ( 462) AT3G61790 | Symbols: | seven in absentia (SINA) family protein | chr3:22871974-22873543 REVERSEweakly similar to ( 152) SINAL_DROME Probable E3 ubiquitin-protein ligase sina-like CG13030 (EC 6.3.2.-) - Drosophila melanogaster (Fruit fly) Sina Sina protein|seven in absentia protein family domain containing protein, expressed	2.98411
33.99	development.unspecified	loc_os04g49620.1	Transcript	very weakly similar to (80.9) AT5G47060 | Symbols: | senescence-associated protein-related | chr5:19116843-19117639 FORWARDDUF581 protein|DUF581 domain containing protein, expressed	3.84723
33.99	development.unspecified	loc_os05g35730.1	Transcript	highly similar to ( 582) AT1G34340 | Symbols: | esterase/lipase/thioesterase family protein | chr1:12530936-12534031 FORWARD COG0429 PRK10985 protein|hydrolase, alpha/beta fold family domain containing protein, expressed	3.00604
33.99	development.unspecified	loc_os02g08190.1	Transcript	highly similar to ( 727) AT3G19240 | Symbols: | FUNCTIONS IN: molecular_function unknown; INVOLVED IN: N-terminal protein myristoylation; LOCATED IN: cellular_component unknown; EXPRESSED IN: 25 plant structures; EXPRESSED DURING: 15 growth stages; CONTAINS InterPro DOMAIN/s: WD40 repeat-like (InterPro:IPR011046), Vacuolar import and degradation, Vid27-related (InterPro:IPR013863); BEST Arabidops…	2.34533
33.99	development.unspecified	loc_os04g43560.1	Transcript	moderately similar to ( 246) AT4G28530 | Symbols: anac074 | anac074 (Arabidopsis NAC domain containing protein 74); transcription factor | chr4:14090725-14094603 REVERSEweakly similar to ( 184) NAC77_ORYSA NAC domain-containing protein 77 (ONAC077) (ONAC300) - Oryza sativa (Rice)NAM protein|no apical meristem protein, putative, expressed	3.62868
33.99	development.unspecified	loc_os02g40070.1	Transcript	moderately similar to ( 341) AT3G20840 | Symbols: PLT1 | PLT1 (PLETHORA 1); transcription factor | chr3:7300764-7303370 FORWARDmoderately similar to ( 339) BBM1_BRANA Protein BABY BOOM 1 (BnBBM1) - Brassica napus (Rape)AP2 protein|AP2-like ethylene-responsive transcription factor PLETHORA 2, putative, expressed	3.82078
33.99	development.unspecified	loc_os04g17660.2	Transcript	weakly similar to ( 111) AT5G66040 | Symbols: STR16 | STR16 (SULFURTRANSFERASE PROTEIN 16) | chr5:26410557-26411139 FORWARDweakly similar to ( 102) DIN1_RAPSA Senescence-associated protein DIN1 - Raphanus sativus (Radish) RHOD protein|rhodanese-like domain containing protein, putative, expressed	-5.8775
33.99	development.unspecified	loc_os01g52690.1	Transcript	very weakly similar to (96.7) AT2G42840 | Symbols: PDF1 | PDF1 (PROTODERMAL FACTOR 1) | chr2:17826327-17827426 REVERSE protein|retrotransposon protein, putative, unclassified, expressed	3.21744
33.99	development.unspecified	loc_os06g16200.1	Transcript	moderately similar to ( 328) AT5G15890 | Symbols: | unknown protein | chr5:5187687-5189348 REVERSEDUF231 protein| proteins of unknown function domain containing protein, expressed	4.72961
33.99	development.unspecified	loc_os05g01570.1	Transcript	moderately similar to ( 224) AT5G64700 | Symbols: | nodulin MtN21 family protein | chr5:25865190-25866845 REVERSE protein|auxin-induced protein 5NG4, putative, expressed	4.0979
33.99	development.unspecified	loc_os01g60810.1	Transcript	weakly similar to ( 102) AT1G06920 | Symbols: ATOFP4, OFP4 | OFP4 (ARABIDOPSIS THALIANA OVATE FAMILY PROTEIN 4) | chr1:2124854-2125801 REVERSEDUF623 protein|DUF623 domain containing protein, expressed	3.78471
33.99	development.unspecified	loc_os01g36580.1	Transcript	moderately similar to ( 230) AT5G64700 | Symbols: | nodulin MtN21 family protein | chr5:25865190-25866845 REVERSE protein|auxin-induced protein 5NG4, putative, expressed	-2.65041
33.99	development.unspecified	loc_os01g52100.1	Transcript	very weakly similar to (85.1) AT5G11460 | Symbols: | senescence-associated protein-related | chr5:3657064-3658388 REVERSE protein|DUF581 domain containing protein, expressed	5.75144
33.99	development.unspecified	loc_os01g67410.1	Transcript	moderately similar to ( 346) AT3G20840 | Symbols: PLT1 | PLT1 (PLETHORA 1); transcription factor | chr3:7300764-7303370 FORWARDmoderately similar to ( 344) BBM1_BRANA Protein BABY BOOM 1 (BnBBM1) - Brassica napus (Rape)AP2 protein|AP2/EREBP transcription factor BABY BOOM, putative, expressed	12.0918
33.99	development.unspecified	loc_os09g36740.1	Transcript	moderately similar to ( 441) AT3G51280 | Symbols: | male sterility MS5, putative | chr3:19037229-19038781 FORWARD protein|tetratricopeptide repeat domain containing protein, expressed	5.01763
33.99	development.unspecified	loc_os01g10980.1	Transcript	weakly similar to ( 181) AT5G64700 | Symbols: | nodulin MtN21 family protein | chr5:25865190-25866845 REVERSE protein|auxin-induced protein 5NG4, putative, expressed	12.0918
33.99	development.unspecified	loc_os06g50930.1	Transcript	weakly similar to ( 160) AT4G35770 | Symbols: SEN1, ATSEN1, DIN1 | SEN1 (SENESCENCE 1) | chr4:16945073-16945964 FORWARDweakly similar to ( 157) DIN1_RAPSA Senescence-associated protein DIN1 - Raphanus sativus (Radish) RHOD RHOD protein|rhodanese-like domain containing protein, putative, expressed	-2.26272
33.99	development.unspecified	loc_os12g29950.1	Transcript	highly similar to ( 563) AT2G39210 | Symbols: | nodulin family protein | chr2:16366287-16368231 REVERSENodulin-like protein|nodulin, putative, expressed	2.76873
33.99	development.unspecified	loc_os05g32270.1	Transcript	weakly similar to ( 174) AT2G41710 | Symbols: | ovule development protein, putative | chr2:17400274-17402903 REVERSEvery weakly similar to (85.1) BBM1_BRANA Protein BABY BOOM 1 (BnBBM1) - Brassica napus (Rape) protein|AP2 domain containing protein, expressed	2.8552
33.99	development.unspecified	loc_os10g14920.1	Transcript	moderately similar to ( 358) AT4G08290 | Symbols: | nodulin MtN21 family protein | chr4:5239088-5240861 FORWARD protein|integral membrane protein DUF6 containing protein, expressed	5.37716
33.99	development.unspecified	loc_os12g29220.1	Transcript	moderately similar to ( 229) AT3G48740 | Symbols: | nodulin MtN3 family protein | chr3:18052814-18054663 REVERSE MtN3_slv protein|nodulin MtN3 family protein, putative, expressed	6.0744
33.99	development.unspecified	loc_os07g34110.1	Transcript	moderately similar to ( 236) AT5G64700 | Symbols: | nodulin MtN21 family protein | chr5:25865190-25866845 REVERSE protein|integral membrane protein DUF6 containing protein, expressed	12.0918
33.99	development.unspecified	loc_os09g33490.1	Transcript	weakly similar to ( 116) AT2G33480 | Symbols: ANAC041 | ANAC041 (Arabidopsis NAC domain containing protein 41); transcription factor | chr2:14181275-14182247 FORWARDvery weakly similar to (94.0) NAC71_ORYSA NAC domain-containing protein 71 (ONAC071) - Oryza sativa (Rice)NAM protein|no apical meristem protein, putative, expressed	8.11557
33.99	development.unspecified	loc_os07g41350.1	Transcript	weakly similar to ( 117) AT3G29970 | Symbols: | germination protein-related | chr3:11745299-11746481 FORWARDB12D protein|B12D protein, putative, expressed	-8.04056
33.99	development.unspecified	loc_os03g40440.1	Transcript	very weakly similar to (89.4) AT3G29970 | Symbols: | germination protein-related | chr3:11745299-11746481 FORWARDB12D protein|B12D protein, putative, expressed	-13.2877
33.99	development.unspecified	loc_os01g60850.1	Transcript	moderately similar to ( 246) AT2G45260 | Symbols: | unknown protein | chr2:18664661-18665938 REVERSE protein|expressed protein	3.28262
33.99	development.unspecified	loc_os01g67650.1	Transcript	weakly similar to ( 199) AT1G14920 | Symbols: GAI, RGA2 | GAI (GIBBERELLIC ACID INSENSITIVE); transcription factor | chr1:5149414-5151015 FORWARDmoderately similar to ( 207) GAI1_VITVI DELLA protein GAI1 (Gibberellic acid-insensitive mutant protein 1) (VvGAI1) - Vitis vinifera (Grape)GRAS protein|gibberellin response modulator protein, putative, expressed	2.81433
33.99	development.unspecified	loc_os08g02160.1	Transcript	moderately similar to ( 291) AT2G02450 | Symbols: ANAC035 | ANAC035 (Arabidopsis NAC domain containing protein 35); transcription factor | chr2:648044-650649 FORWARDweakly similar to ( 168) NAC68_ORYSA NAC domain-containing protein 68 (ONAC068) - Oryza sativa (Rice)NAM protein|no apical meristem protein, putative, expressed	4.82112
33.99	development.unspecified	loc_os02g19820.1	Transcript	moderately similar to ( 221) AT4G10850 | Symbols: | nodulin MtN3 family protein | chr4:6675068-6676718 FORWARD MtN3_slv protein|nodulin MtN3 family protein, putative, expressed	4.11542
33.99	development.unspecified	loc_os10g14920.3	Transcript	moderately similar to ( 217) AT4G08290 | Symbols: | nodulin MtN21 family protein | chr4:5239088-5240861 FORWARD protein|integral membrane protein DUF6 containing protein, expressed	12.0918
33.99	development.unspecified	loc_os04g17660.3	Transcript	very weakly similar to (90.9) AT5G66170 | Symbols: | FUNCTIONS IN: molecular_function unknown; INVOLVED IN: aging; LOCATED IN: cellular_component unknown; EXPRESSED IN: 22 plant structures; EXPRESSED DURING: 11 growth stages; CONTAINS InterPro DOMAIN/s: Rhodanese-like (InterPro:IPR001763); BEST Arabidopsis thaliana protein match is: unknown protein (TAIR:AT2G17850.1); Has 730 Blast hits to 728 pr…	-4.66016
33.99	development.unspecified	loc_os08g42400.1	Transcript	weakly similar to ( 112) AT5G13180 | Symbols: ANAC083 | ANAC083 (ARABIDOPSIS NAC DOMAIN CONTAINING PROTEIN 83); transcription factor | chr5:4196643-4197577 FORWARDvery weakly similar to ( 100) NAC68_ORYSA NAC domain-containing protein 68 (ONAC068) - Oryza sativa (Rice)NAM protein|no apical meristem protein, putative, expressed	2.995
33.99	development.unspecified	loc_os08g44750.1	Transcript	moderately similar to ( 498) AT1G75500 | Symbols: | nodulin MtN21 family protein | chr1:28338282-28340091 REVERSE protein|auxin-induced protein 5NG4, putative, expressed	3.91918
33.99	development.unspecified	loc_os01g01430.1	Transcript	moderately similar to ( 211) AT1G61110 | Symbols: anac025 | anac025 (Arabidopsis NAC domain containing protein 25); transcription factor | chr1:22516730-22518055 FORWARDmoderately similar to ( 204) NAC48_ORYSA NAC domain-containing protein 48 (ONAC048) - Oryza sativa (Rice)NAM protein|No apical meristem protein, putative, expressed	12.0918
33.99	development.unspecified	loc_os03g06760.1	Transcript	highly similar to ( 867) AT3G56640 | Symbols: | exocyst complex subunit Sec15-like family protein | chr3:20981967-20984336 FORWARD Sec15 protein|exocyst complex component 6, putative, expressed	4.71036
33.99	development.unspecified	loc_os09g36600.1	Transcript	moderately similar to ( 287) AT4G34950 | Symbols: | nodulin family protein | chr4:16642544-16644759 REVERSENodulin-like protein|nodulin, putative, expressed	-2.67419
33.99	development.unspecified	loc_os06g33940.1	Transcript	moderately similar to ( 268) AT1G79580 | Symbols: SMB | SMB (SOMBRERO); transcription factor | chr1:29941020-29942925 REVERSEmoderately similar to ( 353) NAC76_ORYSA NAC domain-containing protein 76 (ONAC076) - Oryza sativa (Rice)NAM protein|NAC domain containing protein, putative, expressed	12.0918
33.99	development.unspecified	loc_os09g07450.1	Transcript	moderately similar to ( 216) AT3G50210 | Symbols: | 2-oxoacid-dependent oxidase, putative | chr3:18614338-18616229 REVERSE PcbC protein|flavonol synthase, putative, expressed	5.53553
33.99	development.unspecified	loc_os01g58910.1	Transcript	moderately similar to ( 417) AT5G07050 | Symbols: | LOCATED IN: membrane; CONTAINS InterPro DOMAIN/s: Protein of unknown function DUF6, transmembrane (InterPro:IPR000620); BEST Arabidopsis thaliana protein match is: nodulin MtN21 family protein (TAIR:AT2G40900.1); Has 2288 Blast hits to 2270 proteins in 280 species: Archae - 23; Bacteria - 774; Metazoa - 5; Fungi - 0; Plants - 641; Viruses - 0; O…	12.0918
33.99	development.unspecified	loc_os10g35930.1	Transcript	moderately similar to ( 235) AT1G01780 | Symbols: | LIM domain-containing protein | chr1:282919-284082 FORWARDweakly similar to ( 171) SF3_HELAN Pollen-specific protein SF3 - Helianthus annuus (Common sunflower) protein|OsPLIM2c - LIM domain protein, putative actin-binding protein and transcription factor, expressed	2.35779
33.99	development.unspecified	loc_os01g66490.1	Transcript	moderately similar to ( 297) AT2G02450 | Symbols: ANAC035 | ANAC035 (Arabidopsis NAC domain containing protein 35); transcription factor | chr2:648044-650649 FORWARDweakly similar to ( 177) NAC48_ORYSA NAC domain-containing protein 48 (ONAC048) - Oryza sativa (Rice)NAM protein|no apical meristem protein, putative, expressed	2.52987
33.99	development.unspecified	loc_os06g12820.1	Transcript	moderately similar to ( 293) AT3G28150 | Symbols: | unknown protein | chr3:10471960-10473735 REVERSEDUF231 protein| proteins of unknown function domain containing protein, expressed	7.87159
33.99	development.unspecified	loc_os06g39640.1	Transcript	nearly identical (1493) AT5G43810 | Symbols: ZLL, PNH, AGO10 | ZLL (ZWILLE); translation initiation factor | chr5:17611939-17616562 FORWARD Piwi_ago-like Piwi Piwi_piwi-like_Euk Piwi-like PAZ PAZ_argonaute_like DUF1785 protein|PINHEAD, putative, expressed	2.22546
33.99	development.unspecified	loc_os06g35940.1	Transcript	moderately similar to ( 220) AT1G65480 | Symbols: FT | FT (FLOWERING LOCUS T); phosphatidylethanolamine binding / protein binding | chr1:24331510-24333689 FORWARDweakly similar to ( 188) CET1_TOBAC CEN-like protein 1 - Nicotiana tabacum (Common tobacco) RKIP PBP PEBP_RKIP protein|osFTL12 FT-Like12 homologous to Flowering Locus T gene; contains Pfam profile PF01161: Phosphatidylethanolamine-bindin…	5.4833
33.99	development.unspecified	loc_os04g51000.1	Transcript	moderately similar to ( 294) AT5G61850 | Symbols: LFY, LFY3 | LFY (LEAFY); chromatin DNA binding / sequence-specific DNA binding / transcription factor | chr5:24844295-24846933 FORWARDhighly similar to ( 507) FL_ORYSA Probable transcription factor FL (RFL) - Oryza sativa (Rice)FLO_LFY protein|transcription factor FL, putative, expressed	3.92379
33.99	development.unspecified	loc_os12g36750.1	Transcript	moderately similar to ( 476) AT5G20680 | Symbols: | unknown protein | chr5:6998946-7001596 FORWARDDUF231 protein|expressed protein	5.44856
33.99	development.unspecified	loc_os12g02230.1	Transcript	weakly similar to ( 138) AT2G45260 | Symbols: | unknown protein | chr2:18664661-18665938 REVERSE protein|expressed protein	3.28135
33.99	development.unspecified	loc_os02g03620.1	Transcript	moderately similar to ( 452) AT3G58040 | Symbols: SINAT2 | SINAT2 (SEVEN IN ABSENTIA OF ARABIDOPSIS 2); protein binding / ubiquitin-protein ligase/ zinc ion binding | chr3:21489612-21491085 FORWARDweakly similar to ( 154) SINAL_DROME Probable E3 ubiquitin-protein ligase sina-like CG13030 (EC 6.3.2.-) - Drosophila melanogaster (Fruit fly) Sina Sina protein|seven in absentia protein family domain c…	2.41822

## Sheet: Se+Sub vs NP+Sub
Table S5-B: List of DETs associated with development pathway in Se+Sub.
BinCode	BinName	Gene ID	Type	Description	mapman_Se+Sub vs NP+Sub
33.1	development.storage proteins	loc_os05g02520.1	Transcript	highly similar to ( 514) AT2G28680 | Symbols: | cupin family protein | chr2:12303118-12304747 REVERSEweakly similar to ( 124) GLUB1_ORYSA Glutelin type-B 1 precursor [Contains: Glutelin type-B 1 acidic chain; Glutelin type-B 1 basic chain] - Oryza sativa (Rice) protein|cupin domain containing protein, expressed	-2.42811
33.1	development.storage proteins	loc_os03g57080.1	Transcript	moderately similar to ( 284) AT2G39220 | Symbols: PLP6, PLA IIB | PLP6 (PATATIN-LIKE PROTEIN 6); nutrient reservoir | chr2:16375055-16376663 REVERSE protein|PLA IIIA/PLP7, putative, expressed	3.57235
33.1	development.storage proteins	loc_os11g39990.1	Transcript	moderately similar to ( 397) AT2G26560 | Symbols: PLP2, PLA IIA, PLA2A | PLA2A (PHOSPHOLIPASE A 2A); lipase/ nutrient reservoir | chr2:11293912-11295708 REVERSEmoderately similar to ( 246) PAT5_SOLTU Patatin T5 precursor (Potato tuber protein) - Solanum tuberosum (Potato) Patatin COG3621 protein|patatin, putative, expressed	4.43956
33.1	development.storage proteins	loc_os08g37250.1	Transcript	moderately similar to ( 305) AT2G26560 | Symbols: PLP2, PLA IIA, PLA2A | PLA2A (PHOSPHOLIPASE A 2A); lipase/ nutrient reservoir | chr2:11293912-11295708 REVERSEmoderately similar to ( 209) PAT5_SOLTU Patatin T5 precursor (Potato tuber protein) - Solanum tuberosum (Potato) Patatin protein|patatin, putative, expressed	12.688
33.1	development.storage proteins	loc_os11g40009.1	Transcript	moderately similar to ( 255) AT2G26560 | Symbols: PLP2, PLA IIA, PLA2A | PLA2A (PHOSPHOLIPASE A 2A); lipase/ nutrient reservoir | chr2:11293912-11295708 REVERSEweakly similar to ( 162) PAT5_SOLTU Patatin T5 precursor (Potato tuber protein) - Solanum tuberosum (Potato) Patatin COG3621 protein|phospholipase, patatin family, putative, expressed	12.688
33.1	development.storage proteins	loc_os05g02520.2	Transcript	moderately similar to ( 413) AT2G28680 | Symbols: | cupin family protein | chr2:12303118-12304747 REVERSEvery weakly similar to (89.4) LEGJ_PEA Legumin J precursor [Contains: Legumin J alpha chain (Legumin J acidic chain); Legumin J beta chain (Legumin J basic chain)] - Pisum sativum (Garden pea) protein|cupin domain containing protein, expressed	-3.40587
33.3	development.squamosa promoter binding like (SPL)	loc_os04g56170.1	Transcript	weakly similar to ( 138) AT1G02065 | Symbols: SPL8 | SPL8 (SQUAMOSA PROMOTER BINDING PROTEIN-LIKE 8); DNA binding | chr1:365625-367149 FORWARDmoderately similar to ( 379) LG1_MAIZE LIGULELESS1 protein - Zea mays (Maize)SBP protein|OsSPL8 - SBP-box gene family member, expressed	6.59909
33.3	development.squamosa promoter binding like (SPL)	loc_os02g08070.1	Transcript	weakly similar to ( 123) AT1G02065 | Symbols: SPL8 | SPL8 (SQUAMOSA PROMOTER BINDING PROTEIN-LIKE 8); DNA binding | chr1:365625-367149 FORWARDweakly similar to ( 115) LG1_MAIZE LIGULELESS1 protein - Zea mays (Maize)SBP protein|OsSPL5 - SBP-box gene family member, expressed	12.688
33.3	development.squamosa promoter binding like (SPL)	loc_os07g32170.1	Transcript	weakly similar to ( 120) AT3G60030 | Symbols: SPL12 | SPL12 (squamosa promoter-binding protein-like 12); transcription factor | chr3:22165856-22169410 REVERSEweakly similar to ( 114) LG1_MAIZE LIGULELESS1 protein - Zea mays (Maize)SBP protein|OsSPL13 - SBP-box gene family member, expressed	4.63953
33.3	development.squamosa promoter binding like (SPL)	loc_os06g44860.1	Transcript	weakly similar to ( 151) AT1G02065 | Symbols: SPL8 | SPL8 (SQUAMOSA PROMOTER BINDING PROTEIN-LIKE 8); DNA binding | chr1:365625-367149 FORWARDweakly similar to ( 131) LG1_MAIZE LIGULELESS1 protein - Zea mays (Maize)SBP protein|OsSPL10 - SBP-box gene family member, expressed	6.98277
33.99	development.unspecified	loc_os03g07940.1	Transcript	moderately similar to ( 250) AT1G72570 | Symbols: | DNA binding / transcription factor | chr1:27331381-27333698 FORWARDmoderately similar to ( 229) BBM2_BRANA Protein BABY BOOM 2 (BnBBM2) - Brassica napus (Rape)AP2 protein|AP2 domain containing protein, expressed	12.688
33.99	development.unspecified	loc_os03g56580.1	Transcript	moderately similar to ( 253) AT2G43000 | Symbols: anac042 | anac042 (Arabidopsis NAC domain containing protein 42); transcription factor | chr2:17880617-17882584 REVERSEweakly similar to ( 179) NAC68_ORYSA NAC domain-containing protein 68 (ONAC068) - Oryza sativa (Rice)NAM protein|no apical meristem protein, putative, expressed	3.71564
33.99	development.unspecified	loc_os02g52930.1	Transcript	moderately similar to ( 332) AT1G21890 | Symbols: | nodulin MtN21 family protein | chr1:7682808-7685581 REVERSE protein|integral membrane protein DUF6 containing protein, expressed	12.688
33.99	development.unspecified	loc_os06g01972.1	Transcript	moderately similar to ( 210) AT4G01440 | Symbols: | nodulin MtN21 family protein | chr4:596531-598512 FORWARD protein|auxin-induced protein 5NG4, putative, expressed	4.19455
33.99	development.unspecified	loc_os10g28680.1	Transcript	very weakly similar to (81.3) AT2G25690 | Symbols: | senescence-associated protein-related | chr2:10940530-10941649 REVERSE protein|DUF581 domain containing protein, expressed	4.91424
33.99	development.unspecified	loc_os08g42350.1	Transcript	weakly similar to ( 184) AT5G50790 | Symbols: | nodulin MtN3 family protein | chr5:20656461-20657827 REVERSE MtN3_slv protein|nodulin MtN3 family protein, putative, expressed	5.4744
33.99	development.unspecified	loc_os02g22680.1	Transcript	weakly similar to ( 146) AT1G75500 | Symbols: | nodulin MtN21 family protein | chr1:28338282-28340091 REVERSE protein|integral membrane protein DUF6 containing protein, expressed	-6.2816
33.99	development.unspecified	loc_os05g39800.1	Transcript	moderately similar to ( 296) AT2G30300 | Symbols: | nodulin-related | chr2:12919401-12921222 FORWARDNodulin-like protein|NFD4, putative, expressed	12.688
33.99	development.unspecified	loc_os11g31190.1	Transcript	moderately similar to ( 249) AT5G23660 | Symbols: MTN3 | MTN3 (Arabidopsis homolog of Medicago truncatula MTN3) | chr5:7971936-7973796 REVERSE MtN3_slv protein|nodulin MtN3 family protein, putative, expressed	3.8498
33.99	development.unspecified	loc_os04g51110.2	Transcript	highly similar to ( 620) AT4G33270 | Symbols: CDC20.1 | CDC20.1; signal transducer | chr4:16044545-16046590 REVERSE WD40 COG2319 protein|WD repeat-containing protein, putative, expressed	2.50731
33.99	development.unspecified	loc_os01g50460.1	Transcript	moderately similar to ( 223) AT3G14770 | Symbols: | nodulin MtN3 family protein | chr3:4957787-4959202 REVERSE protein|nodulin MtN3 family protein, putative, expressed	5.13801
33.99	development.unspecified	loc_os04g45520.1	Transcript	weakly similar to ( 148) AT3G43630 | Symbols: | nodulin, putative | chr3:15538816-15539418 FORWARDweakly similar to ( 117) NO21_SOYBN Nodulin 21 (N-21) - Glycine max (Soybean) Nodulin-21 Nodulin-21_like_1 DUF125 Nodulin-21_like_2 protein|integral membrane protein, putative, expressed	-13.2877
33.99	development.unspecified	loc_os08g43410.1	Transcript	weakly similar to ( 155) AT3G51060 | Symbols: STY1, SRS1 | STY1 (STYLISH 1); protein heterodimerization/ transcription factor | chr3:18964606-18966130 FORWARDDUF702 protein|LRP1, putative, expressed	4.80705
33.99	development.unspecified	loc_os01g42090.1	Transcript	moderately similar to ( 239) AT5G62850 | Symbols: AtVEX1 | AtVEX1 (VEGETATIVE CELL EXPRESSED1) | chr5:25230204-25231527 REVERSE MtN3_slv protein|nodulin MtN3 family protein, putative, expressed	5.40004
33.99	development.unspecified	loc_os09g32260.1	Transcript	moderately similar to ( 259) AT2G24430 | Symbols: ANAC039 | ANAC038 (ARABIDOPSIS NAC DOMAIN CONTAINING PROTEIN 38); transcription factor | chr2:10383517-10386386 REVERSEmoderately similar to ( 215) NAC77_ORYSA NAC domain-containing protein 77 (ONAC077) (ONAC300) - Oryza sativa (Rice)NAM protein|no apical meristem protein, putative, expressed	12.688
33.99	development.unspecified	loc_os06g51310.1	Transcript	nearly identical (1368) AT1G48410 | Symbols: AGO1 | AGO1 (ARGONAUTE 1); endoribonuclease/ miRNA binding / protein binding / siRNA binding | chr1:17886285-17891892 REVERSE Piwi_ago-like Piwi Piwi_piwi-like_Euk Piwi-like PAZ PAZ_argonaute_like DUF1785 protein|PAZ domain containing protein, putative, expressed	4.17822
33.99	development.unspecified	loc_os02g56600.1	Transcript	moderately similar to ( 236) AT4G28530 | Symbols: anac074 | anac074 (Arabidopsis NAC domain containing protein 74); transcription factor | chr4:14090725-14094603 REVERSEweakly similar to ( 179) NAC77_ORYSA NAC domain-containing protein 77 (ONAC077) (ONAC300) - Oryza sativa (Rice)NAM protein|no apical meristem protein, putative, expressed	5.75102
33.99	development.unspecified	loc_os03g58580.1	Transcript	highly similar to ( 657) AT2G39210 | Symbols: | nodulin family protein | chr2:16366287-16368231 REVERSENodulin-like protein|nodulin, putative, expressed	3.04724
33.99	development.unspecified	loc_os04g29550.1	Transcript	moderately similar to ( 260) RIP1_ORYSA Putative ripening-related protein 1 precursor - Oryza sativa (Rice) protein|RIPER2 - Ripening-related family protein precursor, expressed	12.688
33.99	development.unspecified	loc_os03g18120.1	Transcript	moderately similar to ( 444) AT5G01360 | Symbols: | EXPRESSED IN: 13 plant structures; EXPRESSED DURING: 4 anthesis, petal differentiation and expansion stage; CONTAINS InterPro DOMAIN/s: Protein of unknown function DUF231, plant (InterPro:IPR004253); BEST Arabidopsis thaliana protein match is: ESK1 (ESKIMO 1) (TAIR:AT3G55990.1); Has 688 Blast hits to 680 proteins in 18 species: Archae - 0; Bacte…	-4.04228
33.99	development.unspecified	loc_os06g44750.1	Transcript	weakly similar to ( 173) AT5G57390 | Symbols: AIL5, CHO1 | AIL5 (AINTEGUMENTA-LIKE 5); DNA binding / transcription factor | chr5:23253459-23256437 REVERSEweakly similar to ( 165) BBM1_BRANA Protein BABY BOOM 1 (BnBBM1) - Brassica napus (Rape)AP2 AP2 protein|AP2 domain containing protein, expressed	12.688
33.99	development.unspecified	loc_os01g72490.1	Transcript	weakly similar to ( 187) AT5G12330 | Symbols: LRP1 | LRP1 (LATERAL ROOT PRIMORDIUM 1); protein homodimerization | chr5:3987677-3989074 REVERSEDUF702 protein|LRP1, putative, expressed	3.55283
33.99	development.unspecified	loc_os04g51110.1	Transcript	highly similar to ( 612) AT4G33270 | Symbols: CDC20.1 | CDC20.1; signal transducer | chr4:16044545-16046590 REVERSE WD40 COG2319 protein|WD repeat-containing protein, putative, expressed	2.42382
33.99	development.unspecified	loc_os04g42720.1	Transcript	moderately similar to ( 410) AT2G33205 | Symbols: | FUNCTIONS IN: molecular_function unknown; INVOLVED IN: biological_process unknown; LOCATED IN: membrane; CONTAINS InterPro DOMAIN/s: TMS membrane protein/tumour differentially expressed protein (InterPro:IPR005016); BEST Arabidopsis thaliana protein match is: MEE55 (maternal effect embryo arrest 55) (TAIR:AT4G13345.1); Has 602 Blast hits to 593 …	2.67315
33.99	development.unspecified	loc_os09g25810.2	Transcript	moderately similar to ( 306) AT4G30420 | Symbols: | nodulin MtN21 family protein | chr4:14877069-14878914 FORWARD protein|nodulin, putative, expressed	2.46735
33.99	development.unspecified	loc_os01g36070.1	Transcript	moderately similar to ( 206) AT3G14770 | Symbols: | nodulin MtN3 family protein | chr3:4957787-4959202 REVERSE protein|nodulin MtN3 family protein, putative, expressed	-2.69707
33.99	development.unspecified	loc_os07g34320.1	Transcript	weakly similar to ( 171) AT5G64700 | Symbols: | nodulin MtN21 family protein | chr5:25865190-25866845 REVERSE protein|nodulin, putative, expressed	12.688
33.99	development.unspecified	loc_os06g10750.1	Transcript	moderately similar to ( 337) AT1G21890 | Symbols: | nodulin MtN21 family protein | chr1:7682808-7685581 REVERSE protein|integral membrane protein DUF6 containing protein, expressed	9.97306
33.99	development.unspecified	loc_os02g13660.1	Transcript	very weakly similar to (94.0) AT2G42840 | Symbols: PDF1 | PDF1 (PROTODERMAL FACTOR 1) | chr2:17826327-17827426 REVERSE protein|meiosis 5, putative, expressed	-3.2209
33.99	development.unspecified	loc_os08g40030.1	Transcript	moderately similar to ( 249) AT1G76420 | Symbols: CUC3, NAC368, ANAC031 | CUC3 (CUP SHAPED COTYLEDON3); transcription factor | chr1:28672029-28673835 REVERSEweakly similar to ( 195) NAC77_ORYSA NAC domain-containing protein 77 (ONAC077) (ONAC300) - Oryza sativa (Rice)NAM protein|CUP-SHAPED COTYLEDON3, putative, expressed	12.688
33.99	development.unspecified	loc_os01g10990.1	Transcript	moderately similar to ( 247) AT5G64700 | Symbols: | nodulin MtN21 family protein | chr5:25865190-25866845 REVERSE protein|integral membrane protein DUF6 containing protein, expressed	12.688
33.99	development.unspecified	loc_os11g03110.1	Transcript	highly similar to ( 569) AT3G54220 | Symbols: SCR, SGR1 | SCR (SCARECROW); protein binding / protein homodimerization/ sequence-specific DNA binding / transcription factor | chr3:20070550-20072625 FORWARDmoderately similar to ( 218) GAI1_VITVI DELLA protein GAI1 (Gibberellic acid-insensitive mutant protein 1) (VvGAI1) - Vitis vinifera (Grape)GRAS protein|GRAS family transcription factor domain co…	2.26396
33.99	development.unspecified	loc_os07g34070.1	Transcript	moderately similar to ( 229) AT5G64700 | Symbols: | nodulin MtN21 family protein | chr5:25865190-25866845 REVERSE protein|auxin-induced protein 5NG4, putative, expressed	4.22831
33.99	development.unspecified	loc_os01g08700.5	Transcript	nearly identical (1438) AT1G22770 | Symbols: GI, FB | GI (GIGANTEA) | chr1:8062398-8067447 FORWARDnearly identical (2217) GIGAN_ORYSA Protein GIGANTEA - Oryza sativa (Rice) protein|GIGANTEA, putative, expressed	-4.47191
33.99	development.unspecified	loc_os02g47180.1	Transcript	highly similar to ( 599) AT4G33270 | Symbols: CDC20.1 | CDC20.1; signal transducer | chr4:16044545-16046590 REVERSE WD40 COG2319 protein|WD repeat-containing protein, putative, expressed	3.31296
33.99	development.unspecified	loc_os05g28830.1	Transcript	moderately similar to ( 452) AT2G40320 | Symbols: | unknown protein | chr2:16840330-16842139 FORWARDDUF231 protein|PMR5, putative, expressed	4.1833
33.99	development.unspecified	loc_os12g03040.1	Transcript	moderately similar to ( 242) AT1G69490 | Symbols: NAP, ANAC029, ATNAP | NAP (NAC-like, activated by AP3/PI); transcription factor | chr1:26122233-26123222 FORWARDmoderately similar to ( 221) NAC68_ORYSA NAC domain-containing protein 68 (ONAC068) - Oryza sativa (Rice)NAM protein|no apical meristem protein, putative, expressed	2.49091
33.99	development.unspecified	loc_os08g42400.2	Transcript	weakly similar to ( 102) AT5G13180 | Symbols: ANAC083 | ANAC083 (ARABIDOPSIS NAC DOMAIN CONTAINING PROTEIN 83); transcription factor | chr5:4196643-4197577 FORWARDvery weakly similar to (89.0) NAC68_ORYSA NAC domain-containing protein 68 (ONAC068) - Oryza sativa (Rice)NAM protein|no apical meristem protein, putative, expressed	3.18108
33.99	development.unspecified	loc_os05g35140.1	Transcript	moderately similar to ( 259) AT1G21460 | Symbols: | nodulin MtN3 family protein | chr1:7512030-7513281 REVERSE MtN3_slv protein|nodulin MtN3 family protein, putative, expressed	12.688
33.99	development.unspecified	loc_os05g48850.1	Transcript	moderately similar to ( 332) AT4G28500 | Symbols: ANAC073, SND2 | ANAC073 (ARABIDOPSIS NAC DOMAIN CONTAINING PROTEIN 73); transcription activator/ transcription factor | chr4:14083014-14084266 FORWARDNAM protein|no apical meristem protein, putative, expressed	2.40505
33.99	development.unspecified	loc_os03g47810.1	Transcript	highly similar to ( 523) AT2G28120 | Symbols: | nodulin family protein | chr2:11985934-11987667 FORWARDNodulin-like protein|nodulin family protein, putative, expressed	12.688
33.99	development.unspecified	loc_os03g05530.1	Transcript	moderately similar to ( 230) AT2G39510 | Symbols: | nodulin MtN21 family protein | chr2:16491358-16493085 REVERSE protein|nodulin, putative, expressed	6.39385
33.99	development.unspecified	loc_os06g14324.1	Transcript	weakly similar to ( 177) AT1G70670 | Symbols: | caleosin-related family protein | chr1:26644830-26645970 FORWARDCaleosin protein|caleosin related protein, putative, expressed	4.85355
33.99	development.unspecified	loc_os01g06560.1	Transcript	very weakly similar to (98.6) AT4G18690 | Symbols: | unknown protein | chr4:10282788-10283636 FORWARD protein|transcription factor HBP-1b, putative, expressed	-7.03255
33.99	development.unspecified	loc_os01g08700.8	Transcript	nearly identical (1177) AT1G22770 | Symbols: GI, FB | GI (GIGANTEA) | chr1:8062398-8067447 FORWARDnearly identical (1838) GIGAN_ORYSA Protein GIGANTEA - Oryza sativa (Rice) protein|GIGANTEA, putative, expressed	-5.52545
33.99	development.unspecified	loc_os04g49620.1	Transcript	very weakly similar to (80.9) AT5G47060 | Symbols: | senescence-associated protein-related | chr5:19116843-19117639 FORWARDDUF581 protein|DUF581 domain containing protein, expressed	2.7927
33.99	development.unspecified	loc_os05g32070.1	Transcript	weakly similar to ( 170) AT5G12330 | Symbols: LRP1 | LRP1 (LATERAL ROOT PRIMORDIUM 1); protein homodimerization | chr5:3987677-3989074 REVERSEDUF702 protein|LRP1, putative, expressed	3.19292
33.99	development.unspecified	loc_os04g43560.1	Transcript	moderately similar to ( 246) AT4G28530 | Symbols: anac074 | anac074 (Arabidopsis NAC domain containing protein 74); transcription factor | chr4:14090725-14094603 REVERSEweakly similar to ( 184) NAC77_ORYSA NAC domain-containing protein 77 (ONAC077) (ONAC300) - Oryza sativa (Rice)NAM protein|no apical meristem protein, putative, expressed	3.20746
33.99	development.unspecified	loc_os02g40070.1	Transcript	moderately similar to ( 341) AT3G20840 | Symbols: PLT1 | PLT1 (PLETHORA 1); transcription factor | chr3:7300764-7303370 FORWARDmoderately similar to ( 339) BBM1_BRANA Protein BABY BOOM 1 (BnBBM1) - Brassica napus (Rape)AP2 protein|AP2-like ethylene-responsive transcription factor PLETHORA 2, putative, expressed	5.1329
33.99	development.unspecified	loc_os06g16200.1	Transcript	moderately similar to ( 328) AT5G15890 | Symbols: | unknown protein | chr5:5187687-5189348 REVERSEDUF231 protein| proteins of unknown function domain containing protein, expressed	5.05876
33.99	development.unspecified	loc_os05g01570.1	Transcript	moderately similar to ( 224) AT5G64700 | Symbols: | nodulin MtN21 family protein | chr5:25865190-25866845 REVERSE protein|auxin-induced protein 5NG4, putative, expressed	4.66679
33.99	development.unspecified	loc_os01g08700.1	Transcript	nearly identical (1438) AT1G22770 | Symbols: GI, FB | GI (GIGANTEA) | chr1:8062398-8067447 FORWARDnearly identical (2217) GIGAN_ORYSA Protein GIGANTEA - Oryza sativa (Rice) protein|GIGANTEA, putative, expressed	-3.42944
33.99	development.unspecified	loc_os01g60810.1	Transcript	weakly similar to ( 102) AT1G06920 | Symbols: ATOFP4, OFP4 | OFP4 (ARABIDOPSIS THALIANA OVATE FAMILY PROTEIN 4) | chr1:2124854-2125801 REVERSEDUF623 protein|DUF623 domain containing protein, expressed	3.33331
33.99	development.unspecified	loc_os01g52100.1	Transcript	very weakly similar to (85.1) AT5G11460 | Symbols: | senescence-associated protein-related | chr5:3657064-3658388 REVERSE protein|DUF581 domain containing protein, expressed	5.59108
33.99	development.unspecified	loc_os01g67410.1	Transcript	moderately similar to ( 346) AT3G20840 | Symbols: PLT1 | PLT1 (PLETHORA 1); transcription factor | chr3:7300764-7303370 FORWARDmoderately similar to ( 344) BBM1_BRANA Protein BABY BOOM 1 (BnBBM1) - Brassica napus (Rape)AP2 protein|AP2/EREBP transcription factor BABY BOOM, putative, expressed	12.688
33.99	development.unspecified	loc_os09g36740.1	Transcript	moderately similar to ( 441) AT3G51280 | Symbols: | male sterility MS5, putative | chr3:19037229-19038781 FORWARD protein|tetratricopeptide repeat domain containing protein, expressed	4.02509
33.99	development.unspecified	loc_os06g51070.1	Transcript	moderately similar to ( 224) AT2G17040 | Symbols: anac036 | anac036 (Arabidopsis NAC domain containing protein 36); transcription factor | chr2:7407123-7408120 FORWARDweakly similar to ( 151) NAC68_ORYSA NAC domain-containing protein 68 (ONAC068) - Oryza sativa (Rice)NAM protein|no apical meristem protein, putative, expressed	2.64452
33.99	development.unspecified	loc_os01g10980.1	Transcript	weakly similar to ( 181) AT5G64700 | Symbols: | nodulin MtN21 family protein | chr5:25865190-25866845 REVERSE protein|auxin-induced protein 5NG4, putative, expressed	12.688
33.99	development.unspecified	loc_os11g03300.1	Transcript	moderately similar to ( 243) AT1G69490 | Symbols: NAP, ANAC029, ATNAP | NAP (NAC-like, activated by AP3/PI); transcription factor | chr1:26122233-26123222 FORWARDmoderately similar to ( 222) NAC68_ORYSA NAC domain-containing protein 68 (ONAC068) - Oryza sativa (Rice)NAM protein|NAC domain transcription factor, putative, expressed	3.47025
33.99	development.unspecified	loc_os06g14370.3	Transcript	weakly similar to ( 176) AT1G70670 | Symbols: | caleosin-related family protein | chr1:26644830-26645970 FORWARDCaleosin protein|caleosin related protein, putative, expressed	-2.75096
33.99	development.unspecified	loc_os10g14920.1	Transcript	moderately similar to ( 358) AT4G08290 | Symbols: | nodulin MtN21 family protein | chr4:5239088-5240861 FORWARD protein|integral membrane protein DUF6 containing protein, expressed	5.22553
33.99	development.unspecified	loc_os06g04090.1	Transcript	moderately similar to ( 269) AT2G46770 | Symbols: NST1, EMB2301, ANAC043 | EMB2301 (EMBRYO DEFECTIVE 2301); transcription activator/ transcription factor | chr2:19220917-19222822 REVERSEmoderately similar to ( 224) NAC76_ORYSA NAC domain-containing protein 76 (ONAC076) - Oryza sativa (Rice)NAM protein|no apical meristem protein, putative, expressed	2.32549
33.99	development.unspecified	loc_os12g29220.1	Transcript	moderately similar to ( 229) AT3G48740 | Symbols: | nodulin MtN3 family protein | chr3:18052814-18054663 REVERSE MtN3_slv protein|nodulin MtN3 family protein, putative, expressed	7.04198
33.99	development.unspecified	loc_os09g33490.1	Transcript	weakly similar to ( 116) AT2G33480 | Symbols: ANAC041 | ANAC041 (Arabidopsis NAC domain containing protein 41); transcription factor | chr2:14181275-14182247 FORWARDvery weakly similar to (94.0) NAC71_ORYSA NAC domain-containing protein 71 (ONAC071) - Oryza sativa (Rice)NAM protein|no apical meristem protein, putative, expressed	6.93997
33.99	development.unspecified	loc_os07g41350.1	Transcript	weakly similar to ( 117) AT3G29970 | Symbols: | germination protein-related | chr3:11745299-11746481 FORWARDB12D protein|B12D protein, putative, expressed	-5.17453
33.99	development.unspecified	loc_os01g60850.1	Transcript	moderately similar to ( 246) AT2G45260 | Symbols: | unknown protein | chr2:18664661-18665938 REVERSE protein|expressed protein	6.41658
33.99	development.unspecified	loc_os01g67650.1	Transcript	weakly similar to ( 199) AT1G14920 | Symbols: GAI, RGA2 | GAI (GIBBERELLIC ACID INSENSITIVE); transcription factor | chr1:5149414-5151015 FORWARDmoderately similar to ( 207) GAI1_VITVI DELLA protein GAI1 (Gibberellic acid-insensitive mutant protein 1) (VvGAI1) - Vitis vinifera (Grape)GRAS protein|gibberellin response modulator protein, putative, expressed	3.18886
33.99	development.unspecified	loc_os08g02160.1	Transcript	moderately similar to ( 291) AT2G02450 | Symbols: ANAC035 | ANAC035 (Arabidopsis NAC domain containing protein 35); transcription factor | chr2:648044-650649 FORWARDweakly similar to ( 168) NAC68_ORYSA NAC domain-containing protein 68 (ONAC068) - Oryza sativa (Rice)NAM protein|no apical meristem protein, putative, expressed	4.42965
33.99	development.unspecified	loc_os02g19820.1	Transcript	moderately similar to ( 221) AT4G10850 | Symbols: | nodulin MtN3 family protein | chr4:6675068-6676718 FORWARD MtN3_slv protein|nodulin MtN3 family protein, putative, expressed	3.2469
33.99	development.unspecified	loc_os10g14920.3	Transcript	moderately similar to ( 217) AT4G08290 | Symbols: | nodulin MtN21 family protein | chr4:5239088-5240861 FORWARD protein|integral membrane protein DUF6 containing protein, expressed	12.688
33.99	development.unspecified	loc_os08g42400.1	Transcript	weakly similar to ( 112) AT5G13180 | Symbols: ANAC083 | ANAC083 (ARABIDOPSIS NAC DOMAIN CONTAINING PROTEIN 83); transcription factor | chr5:4196643-4197577 FORWARDvery weakly similar to ( 100) NAC68_ORYSA NAC domain-containing protein 68 (ONAC068) - Oryza sativa (Rice)NAM protein|no apical meristem protein, putative, expressed	2.87737
33.99	development.unspecified	loc_os01g72710.1	Transcript	moderately similar to ( 363) AT5G12470 | Symbols: | unknown protein | chr5:4044950-4047290 REVERSE protein|expressed protein	2.2835
33.99	development.unspecified	loc_os08g44750.1	Transcript	moderately similar to ( 498) AT1G75500 | Symbols: | nodulin MtN21 family protein | chr1:28338282-28340091 REVERSE protein|auxin-induced protein 5NG4, putative, expressed	4.09063
33.99	development.unspecified	loc_os01g01430.1	Transcript	moderately similar to ( 211) AT1G61110 | Symbols: anac025 | anac025 (Arabidopsis NAC domain containing protein 25); transcription factor | chr1:22516730-22518055 FORWARDmoderately similar to ( 204) NAC48_ORYSA NAC domain-containing protein 48 (ONAC048) - Oryza sativa (Rice)NAM protein|No apical meristem protein, putative, expressed	12.688
33.99	development.unspecified	loc_os06g33940.1	Transcript	moderately similar to ( 268) AT1G79580 | Symbols: SMB | SMB (SOMBRERO); transcription factor | chr1:29941020-29942925 REVERSEmoderately similar to ( 353) NAC76_ORYSA NAC domain-containing protein 76 (ONAC076) - Oryza sativa (Rice)NAM protein|NAC domain containing protein, putative, expressed	12.688
33.99	development.unspecified	loc_os01g58910.1	Transcript	moderately similar to ( 417) AT5G07050 | Symbols: | LOCATED IN: membrane; CONTAINS InterPro DOMAIN/s: Protein of unknown function DUF6, transmembrane (InterPro:IPR000620); BEST Arabidopsis thaliana protein match is: nodulin MtN21 family protein (TAIR:AT2G40900.1); Has 2288 Blast hits to 2270 proteins in 280 species: Archae - 23; Bacteria - 774; Metazoa - 5; Fungi - 0; Plants - 641; Viruses - 0; O…	12.688
33.99	development.unspecified	loc_os01g66490.1	Transcript	moderately similar to ( 297) AT2G02450 | Symbols: ANAC035 | ANAC035 (Arabidopsis NAC domain containing protein 35); transcription factor | chr2:648044-650649 FORWARDweakly similar to ( 177) NAC48_ORYSA NAC domain-containing protein 48 (ONAC048) - Oryza sativa (Rice)NAM protein|no apical meristem protein, putative, expressed	3.52909
33.99	development.unspecified	loc_os06g12820.1	Transcript	moderately similar to ( 293) AT3G28150 | Symbols: | unknown protein | chr3:10471960-10473735 REVERSEDUF231 protein| proteins of unknown function domain containing protein, expressed	6.7481
33.99	development.unspecified	loc_os03g56050.1	Transcript	moderately similar to ( 380) AT4G37750 | Symbols: ANT, DRG, CKC, CKC1 | ANT (AINTEGUMENTA); DNA binding / transcription factor | chr4:17739782-17742189 FORWARDmoderately similar to ( 325) BBM2_BRANA Protein BABY BOOM 2 (BnBBM2) - Brassica napus (Rape)AP2 protein|AP2-like ethylene-responsive transcription factor AINTEGUMENTA, putative, expressed	4.31828
33.99	development.unspecified	loc_os06g35940.1	Transcript	moderately similar to ( 220) AT1G65480 | Symbols: FT | FT (FLOWERING LOCUS T); phosphatidylethanolamine binding / protein binding | chr1:24331510-24333689 FORWARDweakly similar to ( 188) CET1_TOBAC CEN-like protein 1 - Nicotiana tabacum (Common tobacco) RKIP PBP PEBP_RKIP protein|osFTL12 FT-Like12 homologous to Flowering Locus T gene; contains Pfam profile PF01161: Phosphatidylethanolamine-bindin…	3.73332
33.99	development.unspecified	loc_os04g51000.1	Transcript	moderately similar to ( 294) AT5G61850 | Symbols: LFY, LFY3 | LFY (LEAFY); chromatin DNA binding / sequence-specific DNA binding / transcription factor | chr5:24844295-24846933 FORWARDhighly similar to ( 507) FL_ORYSA Probable transcription factor FL (RFL) - Oryza sativa (Rice)FLO_LFY protein|transcription factor FL, putative, expressed	6.6337
33.99	development.unspecified	loc_os12g02230.1	Transcript	weakly similar to ( 138) AT2G45260 | Symbols: | unknown protein | chr2:18664661-18665938 REVERSE protein|expressed protein	2.71615
33.99	development.unspecified	loc_os01g64470.1	Transcript	very weakly similar to (94.4) AT2G35980 | Symbols: YLS9, NHL10, ATNHL10 | YLS9 (YELLOW-LEAF-SPECIFIC GENE 9) | chr2:15110635-15111318 FORWARDHin1 protein|harpin-induced protein 1 domain containing protein, expressed	2.47444

## Sheet: SA+Sub vs NP+Sub
Table S5-C: List of DETs associated with development pathway in SA+Sub.
BinCode	BinName	Gene ID	Type	Description	Mapman_SA+Sub vs NP+Sub
33.1	development.storage proteins	loc_os05g02520.1	Transcript	highly similar to ( 514) AT2G28680 | Symbols: | cupin family protein | chr2:12303118-12304747 REVERSEweakly similar to ( 124) GLUB1_ORYSA Glutelin type-B 1 precursor [Contains: Glutelin type-B 1 acidic chain; Glutelin type-B 1 basic chain] - Oryza sativa (Rice) protein|cupin domain containing protein, expressed	-2.35978
33.1	development.storage proteins	loc_os11g39990.1	Transcript	moderately similar to ( 397) AT2G26560 | Symbols: PLP2, PLA IIA, PLA2A | PLA2A (PHOSPHOLIPASE A 2A); lipase/ nutrient reservoir | chr2:11293912-11295708 REVERSEmoderately similar to ( 246) PAT5_SOLTU Patatin T5 precursor (Potato tuber protein) - Solanum tuberosum (Potato) Patatin COG3621 protein|patatin, putative, expressed	4.01879
33.1	development.storage proteins	loc_os03g43880.1	Transcript	weakly similar to ( 144) AT3G54950 | Symbols: PLP7, PLA IIIA | PLA IIIA (PATATIN-LIKE PROTEIN 6) | chr3:20359076-20360774 REVERSE protein|PLA IIIA/PLP7, putative, expressed	-3.60274
33.1	development.storage proteins	loc_os08g37250.1	Transcript	moderately similar to ( 305) AT2G26560 | Symbols: PLP2, PLA IIA, PLA2A | PLA2A (PHOSPHOLIPASE A 2A); lipase/ nutrient reservoir | chr2:11293912-11295708 REVERSEmoderately similar to ( 209) PAT5_SOLTU Patatin T5 precursor (Potato tuber protein) - Solanum tuberosum (Potato) Patatin protein|patatin, putative, expressed	11.3691
33.1	development.storage proteins	loc_os11g40009.1	Transcript	moderately similar to ( 255) AT2G26560 | Symbols: PLP2, PLA IIA, PLA2A | PLA2A (PHOSPHOLIPASE A 2A); lipase/ nutrient reservoir | chr2:11293912-11295708 REVERSEweakly similar to ( 162) PAT5_SOLTU Patatin T5 precursor (Potato tuber protein) - Solanum tuberosum (Potato) Patatin COG3621 protein|phospholipase, patatin family, putative, expressed	11.3691
33.2	development.late embryogenesis abundant	loc_os01g59680.1	Transcript	weakly similar to ( 115) AT2G27080 | Symbols: | harpin-induced protein-related / HIN1-related / harpin-responsive protein-related | chr2:11566383-11567165 FORWARDHin1 protein|NHL25, putative, expressed	-4.25287
33.2	development.late embryogenesis abundant	loc_os12g03370.1	Transcript	weakly similar to ( 117) AT2G27080 | Symbols: | harpin-induced protein-related / HIN1-related / harpin-responsive protein-related | chr2:11566383-11567165 FORWARDHin1 protein|harpin-induced protein 1 domain containing protein, expressed	-2.7586
33.2	development.late embryogenesis abundant	loc_os05g11010.1	Transcript	very weakly similar to (86.7) AT1G17620 | Symbols: | FUNCTIONS IN: molecular_function unknown; INVOLVED IN: biological_process unknown; LOCATED IN: plasma membrane; EXPRESSED IN: 23 plant structures; EXPRESSED DURING: 13 growth stages; CONTAINS InterPro DOMAIN/s: Harpin-induced 1 (InterPro:IPR010847); BEST Arabidopsis thaliana protein match is: unknown protein (TAIR:AT5G11890.1); Has 539 Blast hi…	-2.49892
33.2	development.late embryogenesis abundant	loc_os07g34040.1	Transcript	protein|harpin-induced protein 1 domain containing protein, expressed	11.3691
33.3	development.squamosa promoter binding like (SPL)	loc_os04g56170.1	Transcript	weakly similar to ( 138) AT1G02065 | Symbols: SPL8 | SPL8 (SQUAMOSA PROMOTER BINDING PROTEIN-LIKE 8); DNA binding | chr1:365625-367149 FORWARDmoderately similar to ( 379) LG1_MAIZE LIGULELESS1 protein - Zea mays (Maize)SBP protein|OsSPL8 - SBP-box gene family member, expressed	6.10082
33.3	development.squamosa promoter binding like (SPL)	loc_os02g08070.1	Transcript	weakly similar to ( 123) AT1G02065 | Symbols: SPL8 | SPL8 (SQUAMOSA PROMOTER BINDING PROTEIN-LIKE 8); DNA binding | chr1:365625-367149 FORWARDweakly similar to ( 115) LG1_MAIZE LIGULELESS1 protein - Zea mays (Maize)SBP protein|OsSPL5 - SBP-box gene family member, expressed	11.3691
33.3	development.squamosa promoter binding like (SPL)	loc_os07g32170.1	Transcript	weakly similar to ( 120) AT3G60030 | Symbols: SPL12 | SPL12 (squamosa promoter-binding protein-like 12); transcription factor | chr3:22165856-22169410 REVERSEweakly similar to ( 114) LG1_MAIZE LIGULELESS1 protein - Zea mays (Maize)SBP protein|OsSPL13 - SBP-box gene family member, expressed	3.55181
33.3	development.squamosa promoter binding like (SPL)	loc_os06g44860.1	Transcript	weakly similar to ( 151) AT1G02065 | Symbols: SPL8 | SPL8 (SQUAMOSA PROMOTER BINDING PROTEIN-LIKE 8); DNA binding | chr1:365625-367149 FORWARDweakly similar to ( 131) LG1_MAIZE LIGULELESS1 protein - Zea mays (Maize)SBP protein|OsSPL10 - SBP-box gene family member, expressed	7.01491
33.99	development.unspecified	loc_os03g07940.1	Transcript	moderately similar to ( 250) AT1G72570 | Symbols: | DNA binding / transcription factor | chr1:27331381-27333698 FORWARDmoderately similar to ( 229) BBM2_BRANA Protein BABY BOOM 2 (BnBBM2) - Brassica napus (Rape)AP2 protein|AP2 domain containing protein, expressed	11.3691
33.99	development.unspecified	loc_os03g56580.1	Transcript	moderately similar to ( 253) AT2G43000 | Symbols: anac042 | anac042 (Arabidopsis NAC domain containing protein 42); transcription factor | chr2:17880617-17882584 REVERSEweakly similar to ( 179) NAC68_ORYSA NAC domain-containing protein 68 (ONAC068) - Oryza sativa (Rice)NAM protein|no apical meristem protein, putative, expressed	4.15704
33.99	development.unspecified	loc_os02g52930.1	Transcript	moderately similar to ( 332) AT1G21890 | Symbols: | nodulin MtN21 family protein | chr1:7682808-7685581 REVERSE protein|integral membrane protein DUF6 containing protein, expressed	11.3691
33.99	development.unspecified	loc_os06g01972.1	Transcript	moderately similar to ( 210) AT4G01440 | Symbols: | nodulin MtN21 family protein | chr4:596531-598512 FORWARD protein|auxin-induced protein 5NG4, putative, expressed	3.206
33.99	development.unspecified	loc_os10g28680.1	Transcript	very weakly similar to (81.3) AT2G25690 | Symbols: | senescence-associated protein-related | chr2:10940530-10941649 REVERSE protein|DUF581 domain containing protein, expressed	4.48493
33.99	development.unspecified	loc_os08g42350.1	Transcript	weakly similar to ( 184) AT5G50790 | Symbols: | nodulin MtN3 family protein | chr5:20656461-20657827 REVERSE MtN3_slv protein|nodulin MtN3 family protein, putative, expressed	5.27716
33.99	development.unspecified	loc_os02g22680.1	Transcript	weakly similar to ( 146) AT1G75500 | Symbols: | nodulin MtN21 family protein | chr1:28338282-28340091 REVERSE protein|integral membrane protein DUF6 containing protein, expressed	-6.93024
33.99	development.unspecified	loc_os05g39800.1	Transcript	moderately similar to ( 296) AT2G30300 | Symbols: | nodulin-related | chr2:12919401-12921222 FORWARDNodulin-like protein|NFD4, putative, expressed	11.3691
33.99	development.unspecified	loc_os11g31190.1	Transcript	moderately similar to ( 249) AT5G23660 | Symbols: MTN3 | MTN3 (Arabidopsis homolog of Medicago truncatula MTN3) | chr5:7971936-7973796 REVERSE MtN3_slv protein|nodulin MtN3 family protein, putative, expressed	3.72552
33.99	development.unspecified	loc_os04g51110.2	Transcript	highly similar to ( 620) AT4G33270 | Symbols: CDC20.1 | CDC20.1; signal transducer | chr4:16044545-16046590 REVERSE WD40 COG2319 protein|WD repeat-containing protein, putative, expressed	3.64994
33.99	development.unspecified	loc_os01g50460.1	Transcript	moderately similar to ( 223) AT3G14770 | Symbols: | nodulin MtN3 family protein | chr3:4957787-4959202 REVERSE protein|nodulin MtN3 family protein, putative, expressed	3.73037
33.99	development.unspecified	loc_os04g45520.1	Transcript	weakly similar to ( 148) AT3G43630 | Symbols: | nodulin, putative | chr3:15538816-15539418 FORWARDweakly similar to ( 117) NO21_SOYBN Nodulin 21 (N-21) - Glycine max (Soybean) Nodulin-21 Nodulin-21_like_1 DUF125 Nodulin-21_like_2 protein|integral membrane protein, putative, expressed	-13.2877
33.99	development.unspecified	loc_os08g43410.1	Transcript	weakly similar to ( 155) AT3G51060 | Symbols: STY1, SRS1 | STY1 (STYLISH 1); protein heterodimerization/ transcription factor | chr3:18964606-18966130 FORWARDDUF702 protein|LRP1, putative, expressed	4.35854
33.99	development.unspecified	loc_os01g42090.1	Transcript	moderately similar to ( 239) AT5G62850 | Symbols: AtVEX1 | AtVEX1 (VEGETATIVE CELL EXPRESSED1) | chr5:25230204-25231527 REVERSE MtN3_slv protein|nodulin MtN3 family protein, putative, expressed	5.58716
33.99	development.unspecified	loc_os12g03050.1	Transcript	moderately similar to ( 219) AT5G18270 | Symbols: ANAC087 | ANAC087; transcription factor | chr5:6041241-6042743 REVERSEhighly similar to ( 637) NAC77_ORYSA NAC domain-containing protein 77 (ONAC077) (ONAC300) - Oryza sativa (Rice)NAM protein|no apical meristem protein, putative, expressed	-3.49105
33.99	development.unspecified	loc_os06g01840.1	Transcript	moderately similar to ( 208) AT3G30340 | Symbols: | nodulin MtN21 family protein | chr3:11956626-11958969 FORWARD protein|nodulin, putative, expressed	2.28385
33.99	development.unspecified	loc_os09g32260.1	Transcript	moderately similar to ( 259) AT2G24430 | Symbols: ANAC039 | ANAC038 (ARABIDOPSIS NAC DOMAIN CONTAINING PROTEIN 38); transcription factor | chr2:10383517-10386386 REVERSEmoderately similar to ( 215) NAC77_ORYSA NAC domain-containing protein 77 (ONAC077) (ONAC300) - Oryza sativa (Rice)NAM protein|no apical meristem protein, putative, expressed	11.3691
33.99	development.unspecified	loc_os06g51310.1	Transcript	nearly identical (1368) AT1G48410 | Symbols: AGO1 | AGO1 (ARGONAUTE 1); endoribonuclease/ miRNA binding / protein binding / siRNA binding | chr1:17886285-17891892 REVERSE Piwi_ago-like Piwi Piwi_piwi-like_Euk Piwi-like PAZ PAZ_argonaute_like DUF1785 protein|PAZ domain containing protein, putative, expressed	4.31446
33.99	development.unspecified	loc_os02g56600.1	Transcript	moderately similar to ( 236) AT4G28530 | Symbols: anac074 | anac074 (Arabidopsis NAC domain containing protein 74); transcription factor | chr4:14090725-14094603 REVERSEweakly similar to ( 179) NAC77_ORYSA NAC domain-containing protein 77 (ONAC077) (ONAC300) - Oryza sativa (Rice)NAM protein|no apical meristem protein, putative, expressed	5.00044
33.99	development.unspecified	loc_os03g13840.1	Transcript	moderately similar to ( 350) AT2G17840 | Symbols: ERD7 | ERD7 (EARLY-RESPONSIVE TO DEHYDRATION 7) | chr2:7755923-7757798 REVERSESenescence protein|senescence-associated protein, putative, expressed	-2.27787
33.99	development.unspecified	loc_os04g29550.1	Transcript	moderately similar to ( 260) RIP1_ORYSA Putative ripening-related protein 1 precursor - Oryza sativa (Rice) protein|RIPER2 - Ripening-related family protein precursor, expressed	11.3691
33.99	development.unspecified	loc_os03g18120.1	Transcript	moderately similar to ( 444) AT5G01360 | Symbols: | EXPRESSED IN: 13 plant structures; EXPRESSED DURING: 4 anthesis, petal differentiation and expansion stage; CONTAINS InterPro DOMAIN/s: Protein of unknown function DUF231, plant (InterPro:IPR004253); BEST Arabidopsis thaliana protein match is: ESK1 (ESKIMO 1) (TAIR:AT3G55990.1); Has 688 Blast hits to 680 proteins in 18 species: Archae - 0; Bacte…	-2.58555
33.99	development.unspecified	loc_os06g44750.1	Transcript	weakly similar to ( 173) AT5G57390 | Symbols: AIL5, CHO1 | AIL5 (AINTEGUMENTA-LIKE 5); DNA binding / transcription factor | chr5:23253459-23256437 REVERSEweakly similar to ( 165) BBM1_BRANA Protein BABY BOOM 1 (BnBBM1) - Brassica napus (Rape)AP2 AP2 protein|AP2 domain containing protein, expressed	11.3691
33.99	development.unspecified	loc_os01g72490.1	Transcript	weakly similar to ( 187) AT5G12330 | Symbols: LRP1 | LRP1 (LATERAL ROOT PRIMORDIUM 1); protein homodimerization | chr5:3987677-3989074 REVERSEDUF702 protein|LRP1, putative, expressed	2.80819
33.99	development.unspecified	loc_os04g51110.1	Transcript	highly similar to ( 612) AT4G33270 | Symbols: CDC20.1 | CDC20.1; signal transducer | chr4:16044545-16046590 REVERSE WD40 COG2319 protein|WD repeat-containing protein, putative, expressed	3.2504
33.99	development.unspecified	loc_os04g42720.1	Transcript	moderately similar to ( 410) AT2G33205 | Symbols: | FUNCTIONS IN: molecular_function unknown; INVOLVED IN: biological_process unknown; LOCATED IN: membrane; CONTAINS InterPro DOMAIN/s: TMS membrane protein/tumour differentially expressed protein (InterPro:IPR005016); BEST Arabidopsis thaliana protein match is: MEE55 (maternal effect embryo arrest 55) (TAIR:AT4G13345.1); Has 602 Blast hits to 593 …	3.42602
33.99	development.unspecified	loc_os01g36070.1	Transcript	moderately similar to ( 206) AT3G14770 | Symbols: | nodulin MtN3 family protein | chr3:4957787-4959202 REVERSE protein|nodulin MtN3 family protein, putative, expressed	-2.49082
33.99	development.unspecified	loc_os07g34320.1	Transcript	weakly similar to ( 171) AT5G64700 | Symbols: | nodulin MtN21 family protein | chr5:25865190-25866845 REVERSE protein|nodulin, putative, expressed	11.3691
33.99	development.unspecified	loc_os06g10750.1	Transcript	moderately similar to ( 337) AT1G21890 | Symbols: | nodulin MtN21 family protein | chr1:7682808-7685581 REVERSE protein|integral membrane protein DUF6 containing protein, expressed	9.24342
33.99	development.unspecified	loc_os05g33900.1	Transcript	moderately similar to ( 437) AT5G07050 | Symbols: | LOCATED IN: membrane; CONTAINS InterPro DOMAIN/s: Protein of unknown function DUF6, transmembrane (InterPro:IPR000620); BEST Arabidopsis thaliana protein match is: nodulin MtN21 family protein (TAIR:AT2G40900.1); Has 2288 Blast hits to 2270 proteins in 280 species: Archae - 23; Bacteria - 774; Metazoa - 5; Fungi - 0; Plants - 641; Viruses - 0; O…	11.3691
33.99	development.unspecified	loc_os02g47180.2	Transcript	highly similar to ( 599) AT4G33270 | Symbols: CDC20.1 | CDC20.1; signal transducer | chr4:16044545-16046590 REVERSE WD40 COG2319 protein|WD repeat-containing protein, putative, expressed	4.22044
33.99	development.unspecified	loc_os08g40030.1	Transcript	moderately similar to ( 249) AT1G76420 | Symbols: CUC3, NAC368, ANAC031 | CUC3 (CUP SHAPED COTYLEDON3); transcription factor | chr1:28672029-28673835 REVERSEweakly similar to ( 195) NAC77_ORYSA NAC domain-containing protein 77 (ONAC077) (ONAC300) - Oryza sativa (Rice)NAM protein|CUP-SHAPED COTYLEDON3, putative, expressed	11.3691
33.99	development.unspecified	loc_os01g10990.1	Transcript	moderately similar to ( 247) AT5G64700 | Symbols: | nodulin MtN21 family protein | chr5:25865190-25866845 REVERSE protein|integral membrane protein DUF6 containing protein, expressed	11.3691
33.99	development.unspecified	loc_os08g34460.1	Transcript	moderately similar to ( 276) AT2G23810 | Symbols: TET8 | TET8 (TETRASPANIN8) | chr2:10135859-10137352 REVERSETetraspannin protein|tetraspanin family protein, putative, expressed	-3.74184
33.99	development.unspecified	loc_os02g47180.1	Transcript	highly similar to ( 599) AT4G33270 | Symbols: CDC20.1 | CDC20.1; signal transducer | chr4:16044545-16046590 REVERSE WD40 COG2319 protein|WD repeat-containing protein, putative, expressed	4.26781
33.99	development.unspecified	loc_os05g28830.1	Transcript	moderately similar to ( 452) AT2G40320 | Symbols: | unknown protein | chr2:16840330-16842139 FORWARDDUF231 protein|PMR5, putative, expressed	3.64818
33.99	development.unspecified	loc_os02g54780.1	Transcript	highly similar to ( 673) AT3G19240 | Symbols: | FUNCTIONS IN: molecular_function unknown; INVOLVED IN: N-terminal protein myristoylation; LOCATED IN: cellular_component unknown; EXPRESSED IN: 25 plant structures; EXPRESSED DURING: 15 growth stages; CONTAINS InterPro DOMAIN/s: WD40 repeat-like (InterPro:IPR011046), Vacuolar import and degradation, Vid27-related (InterPro:IPR013863); BEST Arabidops…	-2.26016
33.99	development.unspecified	loc_os08g42400.2	Transcript	weakly similar to ( 102) AT5G13180 | Symbols: ANAC083 | ANAC083 (ARABIDOPSIS NAC DOMAIN CONTAINING PROTEIN 83); transcription factor | chr5:4196643-4197577 FORWARDvery weakly similar to (89.0) NAC68_ORYSA NAC domain-containing protein 68 (ONAC068) - Oryza sativa (Rice)NAM protein|no apical meristem protein, putative, expressed	2.60299
33.99	development.unspecified	loc_os05g35140.1	Transcript	moderately similar to ( 259) AT1G21460 | Symbols: | nodulin MtN3 family protein | chr1:7512030-7513281 REVERSE MtN3_slv protein|nodulin MtN3 family protein, putative, expressed	11.3691
33.99	development.unspecified	loc_os05g48850.1	Transcript	moderately similar to ( 332) AT4G28500 | Symbols: ANAC073, SND2 | ANAC073 (ARABIDOPSIS NAC DOMAIN CONTAINING PROTEIN 73); transcription activator/ transcription factor | chr4:14083014-14084266 FORWARDNAM protein|no apical meristem protein, putative, expressed	2.34373
33.99	development.unspecified	loc_os03g05530.1	Transcript	moderately similar to ( 230) AT2G39510 | Symbols: | nodulin MtN21 family protein | chr2:16491358-16493085 REVERSE protein|nodulin, putative, expressed	6.91347
33.99	development.unspecified	loc_os06g14324.1	Transcript	weakly similar to ( 177) AT1G70670 | Symbols: | caleosin-related family protein | chr1:26644830-26645970 FORWARDCaleosin protein|caleosin related protein, putative, expressed	5.72135
33.99	development.unspecified	loc_os01g06560.1	Transcript	very weakly similar to (98.6) AT4G18690 | Symbols: | unknown protein | chr4:10282788-10283636 FORWARD protein|transcription factor HBP-1b, putative, expressed	-3.67663
33.99	development.unspecified	loc_os01g48130.1	Transcript	moderately similar to ( 351) AT4G28500 | Symbols: ANAC073, SND2 | ANAC073 (ARABIDOPSIS NAC DOMAIN CONTAINING PROTEIN 73); transcription activator/ transcription factor | chr4:14083014-14084266 FORWARDNAM protein|no apical meristem protein, putative, expressed	2.43771
33.99	development.unspecified	loc_os07g46560.1	Transcript	moderately similar to ( 462) AT3G61790 | Symbols: | seven in absentia (SINA) family protein | chr3:22871974-22873543 REVERSEweakly similar to ( 152) SINAL_DROME Probable E3 ubiquitin-protein ligase sina-like CG13030 (EC 6.3.2.-) - Drosophila melanogaster (Fruit fly) Sina Sina protein|seven in absentia protein family domain containing protein, expressed	2.38509
33.99	development.unspecified	loc_os12g07874.1	Transcript	moderately similar to ( 423) AT5G54200 | Symbols: | WD-40 repeat family protein | chr5:21993565-21997076 REVERSE WD40 COG2319 protein|WD-40 repeat family protein, putative, expressed	-3.41084
33.99	development.unspecified	loc_os02g40070.1	Transcript	moderately similar to ( 341) AT3G20840 | Symbols: PLT1 | PLT1 (PLETHORA 1); transcription factor | chr3:7300764-7303370 FORWARDmoderately similar to ( 339) BBM1_BRANA Protein BABY BOOM 1 (BnBBM1) - Brassica napus (Rape)AP2 protein|AP2-like ethylene-responsive transcription factor PLETHORA 2, putative, expressed	5.74008
33.99	development.unspecified	loc_os01g52690.1	Transcript	very weakly similar to (96.7) AT2G42840 | Symbols: PDF1 | PDF1 (PROTODERMAL FACTOR 1) | chr2:17826327-17827426 REVERSE protein|retrotransposon protein, putative, unclassified, expressed	3.2075
33.99	development.unspecified	loc_os05g01570.1	Transcript	moderately similar to ( 224) AT5G64700 | Symbols: | nodulin MtN21 family protein | chr5:25865190-25866845 REVERSE protein|auxin-induced protein 5NG4, putative, expressed	3.39616
33.99	development.unspecified	loc_os01g52100.1	Transcript	very weakly similar to (85.1) AT5G11460 | Symbols: | senescence-associated protein-related | chr5:3657064-3658388 REVERSE protein|DUF581 domain containing protein, expressed	5.17943
33.99	development.unspecified	loc_os01g67410.1	Transcript	moderately similar to ( 346) AT3G20840 | Symbols: PLT1 | PLT1 (PLETHORA 1); transcription factor | chr3:7300764-7303370 FORWARDmoderately similar to ( 344) BBM1_BRANA Protein BABY BOOM 1 (BnBBM1) - Brassica napus (Rape)AP2 protein|AP2/EREBP transcription factor BABY BOOM, putative, expressed	11.3691
33.99	development.unspecified	loc_os09g36740.1	Transcript	moderately similar to ( 441) AT3G51280 | Symbols: | male sterility MS5, putative | chr3:19037229-19038781 FORWARD protein|tetratricopeptide repeat domain containing protein, expressed	4.54107
33.99	development.unspecified	loc_os01g10980.1	Transcript	weakly similar to ( 181) AT5G64700 | Symbols: | nodulin MtN21 family protein | chr5:25865190-25866845 REVERSE protein|auxin-induced protein 5NG4, putative, expressed	11.3691
33.99	development.unspecified	loc_os11g03300.1	Transcript	moderately similar to ( 243) AT1G69490 | Symbols: NAP, ANAC029, ATNAP | NAP (NAC-like, activated by AP3/PI); transcription factor | chr1:26122233-26123222 FORWARDmoderately similar to ( 222) NAC68_ORYSA NAC domain-containing protein 68 (ONAC068) - Oryza sativa (Rice)NAM protein|NAC domain transcription factor, putative, expressed	3.15601
33.99	development.unspecified	loc_os05g32270.1	Transcript	weakly similar to ( 174) AT2G41710 | Symbols: | ovule development protein, putative | chr2:17400274-17402903 REVERSEvery weakly similar to (85.1) BBM1_BRANA Protein BABY BOOM 1 (BnBBM1) - Brassica napus (Rape) protein|AP2 domain containing protein, expressed	2.4397
33.99	development.unspecified	loc_os06g14370.3	Transcript	weakly similar to ( 176) AT1G70670 | Symbols: | caleosin-related family protein | chr1:26644830-26645970 FORWARDCaleosin protein|caleosin related protein, putative, expressed	-4.12379
33.99	development.unspecified	loc_os10g14920.1	Transcript	moderately similar to ( 358) AT4G08290 | Symbols: | nodulin MtN21 family protein | chr4:5239088-5240861 FORWARD protein|integral membrane protein DUF6 containing protein, expressed	5.05214
33.99	development.unspecified	loc_os12g29220.1	Transcript	moderately similar to ( 229) AT3G48740 | Symbols: | nodulin MtN3 family protein | chr3:18052814-18054663 REVERSE MtN3_slv protein|nodulin MtN3 family protein, putative, expressed	6.13062
33.99	development.unspecified	loc_os07g34110.1	Transcript	moderately similar to ( 236) AT5G64700 | Symbols: | nodulin MtN21 family protein | chr5:25865190-25866845 REVERSE protein|integral membrane protein DUF6 containing protein, expressed	11.3691
33.99	development.unspecified	loc_os09g33490.1	Transcript	weakly similar to ( 116) AT2G33480 | Symbols: ANAC041 | ANAC041 (Arabidopsis NAC domain containing protein 41); transcription factor | chr2:14181275-14182247 FORWARDvery weakly similar to (94.0) NAC71_ORYSA NAC domain-containing protein 71 (ONAC071) - Oryza sativa (Rice)NAM protein|no apical meristem protein, putative, expressed	6.23805
33.99	development.unspecified	loc_os07g41350.1	Transcript	weakly similar to ( 117) AT3G29970 | Symbols: | germination protein-related | chr3:11745299-11746481 FORWARDB12D protein|B12D protein, putative, expressed	-3.62044
33.99	development.unspecified	loc_os01g60850.1	Transcript	moderately similar to ( 246) AT2G45260 | Symbols: | unknown protein | chr2:18664661-18665938 REVERSE protein|expressed protein	5.26393
33.99	development.unspecified	loc_os08g02160.1	Transcript	moderately similar to ( 291) AT2G02450 | Symbols: ANAC035 | ANAC035 (Arabidopsis NAC domain containing protein 35); transcription factor | chr2:648044-650649 FORWARDweakly similar to ( 168) NAC68_ORYSA NAC domain-containing protein 68 (ONAC068) - Oryza sativa (Rice)NAM protein|no apical meristem protein, putative, expressed	4.00412
33.99	development.unspecified	loc_os02g19820.1	Transcript	moderately similar to ( 221) AT4G10850 | Symbols: | nodulin MtN3 family protein | chr4:6675068-6676718 FORWARD MtN3_slv protein|nodulin MtN3 family protein, putative, expressed	2.48222
33.99	development.unspecified	loc_os10g14920.3	Transcript	moderately similar to ( 217) AT4G08290 | Symbols: | nodulin MtN21 family protein | chr4:5239088-5240861 FORWARD protein|integral membrane protein DUF6 containing protein, expressed	11.3691
33.99	development.unspecified	loc_os01g72490.2	Transcript	weakly similar to ( 187) AT5G12330 | Symbols: LRP1 | LRP1 (LATERAL ROOT PRIMORDIUM 1); protein homodimerization | chr5:3987677-3989074 REVERSEDUF702 protein|LRP1, putative, expressed	5.1748
33.99	development.unspecified	loc_os02g08150.1	Transcript	very weakly similar to (84.7) AT5G57660 | Symbols: ATCOL5, COL5 | zinc finger (B-box type) family protein | chr5:23355573-23356729 FORWARDCCT protein|CCT/B-box zinc finger protein, putative, expressed	-2.49915
33.99	development.unspecified	loc_os03g60080.1	Transcript	moderately similar to ( 238) AT5G63790 | Symbols: ANAC102 | ANAC102 (ARABIDOPSIS NAC DOMAIN CONTAINING PROTEIN 102); transcription factor | chr5:25526887-25528013 REVERSEmoderately similar to ( 298) NAC67_ORYSA NAC domain-containing protein 67 (ONAC067) - Oryza sativa (Rice)NAM protein|NAC domain-containing protein 67, putative, expressed	-2.58226
33.99	development.unspecified	loc_os01g60020.1	Transcript	moderately similar to ( 254) AT1G77450 | Symbols: anac032 | anac032 (Arabidopsis NAC domain containing protein 32); transcription factor | chr1:29100029-29100981 FORWARDhighly similar to ( 594) NAC68_ORYSA NAC domain-containing protein 68 (ONAC068) - Oryza sativa (Rice)NAM protein|NAC domain transcription factor, putative, expressed	2.51284
33.99	development.unspecified	loc_os08g44750.1	Transcript	moderately similar to ( 498) AT1G75500 | Symbols: | nodulin MtN21 family protein | chr1:28338282-28340091 REVERSE protein|auxin-induced protein 5NG4, putative, expressed	4.57569
33.99	development.unspecified	loc_os01g01430.1	Transcript	moderately similar to ( 211) AT1G61110 | Symbols: anac025 | anac025 (Arabidopsis NAC domain containing protein 25); transcription factor | chr1:22516730-22518055 FORWARDmoderately similar to ( 204) NAC48_ORYSA NAC domain-containing protein 48 (ONAC048) - Oryza sativa (Rice)NAM protein|No apical meristem protein, putative, expressed	11.3691
33.99	development.unspecified	loc_os06g33940.1	Transcript	moderately similar to ( 268) AT1G79580 | Symbols: SMB | SMB (SOMBRERO); transcription factor | chr1:29941020-29942925 REVERSEmoderately similar to ( 353) NAC76_ORYSA NAC domain-containing protein 76 (ONAC076) - Oryza sativa (Rice)NAM protein|NAC domain containing protein, putative, expressed	11.3691
33.99	development.unspecified	loc_os09g07450.1	Transcript	moderately similar to ( 216) AT3G50210 | Symbols: | 2-oxoacid-dependent oxidase, putative | chr3:18614338-18616229 REVERSE PcbC protein|flavonol synthase, putative, expressed	3.58238
33.99	development.unspecified	loc_os01g58910.1	Transcript	moderately similar to ( 417) AT5G07050 | Symbols: | LOCATED IN: membrane; CONTAINS InterPro DOMAIN/s: Protein of unknown function DUF6, transmembrane (InterPro:IPR000620); BEST Arabidopsis thaliana protein match is: nodulin MtN21 family protein (TAIR:AT2G40900.1); Has 2288 Blast hits to 2270 proteins in 280 species: Archae - 23; Bacteria - 774; Metazoa - 5; Fungi - 0; Plants - 641; Viruses - 0; O…	11.3691
33.99	development.unspecified	loc_os07g08210.2	Transcript	moderately similar to ( 212) AT2G18250 | Symbols: ATCOAD | ATCOAD (4-phosphopantetheine adenylyltransferase); nucleotidyltransferase/ pantetheine-phosphate adenylyltransferase | chr2:7940025-7941499 FORWARD PPAT_CoAS COG1019 PRK00777 protein|cytidylyltransferase domain containing protein, expressed	3.32515
33.99	development.unspecified	loc_os01g66490.1	Transcript	moderately similar to ( 297) AT2G02450 | Symbols: ANAC035 | ANAC035 (Arabidopsis NAC domain containing protein 35); transcription factor | chr2:648044-650649 FORWARDweakly similar to ( 177) NAC48_ORYSA NAC domain-containing protein 48 (ONAC048) - Oryza sativa (Rice)NAM protein|no apical meristem protein, putative, expressed	3.47681
33.99	development.unspecified	loc_os06g12820.1	Transcript	moderately similar to ( 293) AT3G28150 | Symbols: | unknown protein | chr3:10471960-10473735 REVERSEDUF231 protein| proteins of unknown function domain containing protein, expressed	7.021
33.99	development.unspecified	loc_os03g56050.1	Transcript	moderately similar to ( 380) AT4G37750 | Symbols: ANT, DRG, CKC, CKC1 | ANT (AINTEGUMENTA); DNA binding / transcription factor | chr4:17739782-17742189 FORWARDmoderately similar to ( 325) BBM2_BRANA Protein BABY BOOM 2 (BnBBM2) - Brassica napus (Rape)AP2 protein|AP2-like ethylene-responsive transcription factor AINTEGUMENTA, putative, expressed	3.32353
33.99	development.unspecified	loc_os11g05614.1	Transcript	weakly similar to ( 196) AT5G22380 | Symbols: anac090 | anac090 (Arabidopsis NAC domain containing protein 90); transcription factor | chr5:7408924-7410038 REVERSEweakly similar to ( 106) NAC71_ORYSA NAC domain-containing protein 71 (ONAC071) - Oryza sativa (Rice)NAM protein|no apical meristem protein, putative, expressed	-2.6097
33.99	development.unspecified	loc_os06g35940.1	Transcript	moderately similar to ( 220) AT1G65480 | Symbols: FT | FT (FLOWERING LOCUS T); phosphatidylethanolamine binding / protein binding | chr1:24331510-24333689 FORWARDweakly similar to ( 188) CET1_TOBAC CEN-like protein 1 - Nicotiana tabacum (Common tobacco) RKIP PBP PEBP_RKIP protein|osFTL12 FT-Like12 homologous to Flowering Locus T gene; contains Pfam profile PF01161: Phosphatidylethanolamine-bindin…	3.40304
33.99	development.unspecified	loc_os12g02230.1	Transcript	weakly similar to ( 138) AT2G45260 | Symbols: | unknown protein | chr2:18664661-18665938 REVERSE protein|expressed protein	3.23299
33.99	development.unspecified	loc_os03g13840.2	Transcript	moderately similar to ( 350) AT2G17840 | Symbols: ERD7 | ERD7 (EARLY-RESPONSIVE TO DEHYDRATION 7) | chr2:7755923-7757798 REVERSESenescence protein|senescence-associated protein, putative, expressed	-2.67848
