# Supplementary material for: Comparative Transcriptional Profiling of Primed and Non-primed Rice Seedlings under Submergence Stress
Source: Front Plant Sci. 2016 Jul 28;7:1125. doi: 10.3389/fpls.2016.01125 (PMC4964843; doi:10.3389/fpls.2016.01125)
Supplement: Table S6 — Overlapped GO enrichments in seed priming treatments (Se+Sub and SA+Sub) compared with NP+Sub. [file DataSheet6.XLS]

## Sheet: GO_BP_overlap_S56vsS34andS78vsS
Table S6: Overlapped GO enrichments in seed priming treatments (Se+Sub and SA+Sub) treatments.
GO_acc	Term_type	Term	Query item	Query total	bgitem	bgtotal	pvalue	FDR	entries
GO:0006979	P	response to oxidative stress	45	979	235	30241	1.9e-19	1.3e-16	// LOC_Os03g36560.1 // LOC_Os01g18950.1 // LOC_Os03g25340.1 // LOC_Os02g14180.1 // LOC_Os12g08920.1 // LOC_Os07g01400.1 // LOC_Os01g73170.1 // LOC_Os05g04410.1 // LOC_Os03g22020.1 // LOC_Os03g22010.1 // LOC_Os03g25300.1 // LOC_Os01g19020.1 // LOC_Os03g02939.1 // LOC_Os10g39170.1 // LOC_Os07g34710.1 // LOC_Os05g06970.1 // LOC_Os04g59190.1 // LOC_Os05g04500.1 // LOC_Os04g59260.1 // LOC_Os01g18970.1…
GO:0006118	P	electron transport	109	979	1432	30241	1.7e-15	4.1e-13	// LOC_Os12g05440.1 // LOC_Os09g20260.1 // LOC_Os02g14180.1 // LOC_Os02g47470.2 // LOC_Os03g12500.1 // LOC_Os01g11270.1 // LOC_Os03g57220.1 // LOC_Os10g34480.1 // LOC_Os02g09220.1 // LOC_Os10g39160.1 // LOC_Os01g45760.1 // LOC_Os03g25370.1 // LOC_Os01g72760.1 // LOC_Os06g35480.1 // LOC_Os08g37660.1 // LOC_Os02g09250.1 // LOC_Os03g52860.1 // LOC_Os07g28160.1 // LOC_Os05g41990.1 // LOC_Os01g72740.1…
GO:0042221	P	response to chemical stimulus	51	979	394	30241	1.8e-15	4.1e-13	// LOC_Os03g36560.1 // LOC_Os01g18950.1 // LOC_Os03g25340.1 // LOC_Os02g14180.1 // LOC_Os12g08920.1 // LOC_Os07g01400.1 // LOC_Os01g73170.1 // LOC_Os05g04410.1 // LOC_Os03g22020.1 // LOC_Os03g22010.1 // LOC_Os03g25300.1 // LOC_Os01g19020.1 // LOC_Os03g02939.1 // LOC_Os10g39170.1 // LOC_Os09g29284.1 // LOC_Os07g34710.1 // LOC_Os10g20450.1 // LOC_Os05g06970.1 // LOC_Os04g59190.1 // LOC_Os05g04500.1…
GO:0010876	P	lipid localization	28	979	125	30241	4.5e-14	6.4e-12	// LOC_Os04g55170.1 // LOC_Os03g57970.1 // LOC_Os03g01320.1 // LOC_Os01g49640.1 // LOC_Os11g02400.2 // LOC_Os02g44320.1 // LOC_Os01g60740.1 // LOC_Os11g02369.1 // LOC_Os10g40480.1 // LOC_Os12g02330.2 // LOC_Os03g14654.1 // LOC_Os10g40530.1 // LOC_Os03g01300.1 // LOC_Os10g20890.1 // LOC_Os03g14642.1 // LOC_Os03g57990.1 // LOC_Os10g36160.1 // LOC_Os10g40440.1 // LOC_Os10g40520.1 // LOC_Os10g40470.1…
GO:0006869	P	lipid transport	28	979	125	30241	4.5e-14	6.4e-12	// LOC_Os04g55170.1 // LOC_Os03g57970.1 // LOC_Os03g01320.1 // LOC_Os01g49640.1 // LOC_Os11g02400.2 // LOC_Os02g44320.1 // LOC_Os01g60740.1 // LOC_Os11g02369.1 // LOC_Os10g40480.1 // LOC_Os12g02330.2 // LOC_Os03g14654.1 // LOC_Os10g40530.1 // LOC_Os03g01300.1 // LOC_Os10g20890.1 // LOC_Os03g14642.1 // LOC_Os03g57990.1 // LOC_Os10g36160.1 // LOC_Os10g40440.1 // LOC_Os10g40520.1 // LOC_Os10g40470.1…
GO:0045449	P	regulation of transcription	129	979	2088	30241	6.6e-12	7.7e-10	// LOC_Os06g44010.1 // LOC_Os08g42400.2 // LOC_Os03g56050.1 // LOC_Os03g21970.1 // LOC_Os06g43220.1 // LOC_Os10g39030.1 // LOC_Os07g03770.1 // LOC_Os05g36900.1 // LOC_Os01g50720.1 // LOC_Os08g15020.1 // LOC_Os11g35390.1 // LOC_Os01g52680.1 // LOC_Os06g44750.1 // LOC_Os12g41060.1 // LOC_Os09g25070.1 // LOC_Os04g38740.1 // LOC_Os06g08340.1 // LOC_Os09g29820.1 // LOC_Os11g03300.1 // LOC_Os03g03260.1…
GO:0019219	P	regulation of nucleobase, nucleoside, nucleotide and nucleic acid metabolic process	129	979	2099	30241	9.2e-12	8.1e-10	// LOC_Os06g44010.1 // LOC_Os08g42400.2 // LOC_Os03g56050.1 // LOC_Os03g21970.1 // LOC_Os06g43220.1 // LOC_Os10g39030.1 // LOC_Os07g03770.1 // LOC_Os05g36900.1 // LOC_Os01g50720.1 // LOC_Os08g15020.1 // LOC_Os11g35390.1 // LOC_Os01g52680.1 // LOC_Os06g44750.1 // LOC_Os12g41060.1 // LOC_Os09g25070.1 // LOC_Os04g38740.1 // LOC_Os06g08340.1 // LOC_Os09g29820.1 // LOC_Os11g03300.1 // LOC_Os03g03260.1…
GO:0051171	P	regulation of nitrogen compound metabolic process	129	979	2099	30241	9.2e-12	8.1e-10	// LOC_Os06g44010.1 // LOC_Os08g42400.2 // LOC_Os03g56050.1 // LOC_Os03g21970.1 // LOC_Os06g43220.1 // LOC_Os10g39030.1 // LOC_Os07g03770.1 // LOC_Os05g36900.1 // LOC_Os01g50720.1 // LOC_Os08g15020.1 // LOC_Os11g35390.1 // LOC_Os01g52680.1 // LOC_Os06g44750.1 // LOC_Os12g41060.1 // LOC_Os09g25070.1 // LOC_Os04g38740.1 // LOC_Os06g08340.1 // LOC_Os09g29820.1 // LOC_Os11g03300.1 // LOC_Os03g03260.1…
GO:0009889	P	regulation of biosynthetic process	130	979	2137	30241	1.5e-11	9.3e-10	// LOC_Os03g48235.1 // LOC_Os08g42400.2 // LOC_Os03g56050.1 // LOC_Os03g21970.1 // LOC_Os06g43220.1 // LOC_Os10g39030.1 // LOC_Os07g03770.1 // LOC_Os05g36900.1 // LOC_Os01g50720.1 // LOC_Os08g15020.1 // LOC_Os11g35390.1 // LOC_Os01g52680.1 // LOC_Os06g44750.1 // LOC_Os12g41060.1 // LOC_Os09g25070.1 // LOC_Os04g38740.1 // LOC_Os06g08340.1 // LOC_Os09g29820.1 // LOC_Os11g03300.1 // LOC_Os03g03260.1…
GO:0010556	P	regulation of macromolecule biosynthetic process	130	979	2137	30241	1.5e-11	9.3e-10	// LOC_Os03g48235.1 // LOC_Os08g42400.2 // LOC_Os03g56050.1 // LOC_Os03g21970.1 // LOC_Os06g43220.1 // LOC_Os10g39030.1 // LOC_Os07g03770.1 // LOC_Os05g36900.1 // LOC_Os01g50720.1 // LOC_Os08g15020.1 // LOC_Os11g35390.1 // LOC_Os01g52680.1 // LOC_Os06g44750.1 // LOC_Os12g41060.1 // LOC_Os09g25070.1 // LOC_Os04g38740.1 // LOC_Os06g08340.1 // LOC_Os09g29820.1 // LOC_Os11g03300.1 // LOC_Os03g03260.1…
GO:0031326	P	regulation of cellular biosynthetic process	130	979	2137	30241	1.5e-11	9.3e-10	// LOC_Os03g48235.1 // LOC_Os08g42400.2 // LOC_Os03g56050.1 // LOC_Os03g21970.1 // LOC_Os06g43220.1 // LOC_Os10g39030.1 // LOC_Os07g03770.1 // LOC_Os05g36900.1 // LOC_Os01g50720.1 // LOC_Os08g15020.1 // LOC_Os11g35390.1 // LOC_Os01g52680.1 // LOC_Os06g44750.1 // LOC_Os12g41060.1 // LOC_Os09g25070.1 // LOC_Os04g38740.1 // LOC_Os06g08340.1 // LOC_Os09g29820.1 // LOC_Os11g03300.1 // LOC_Os03g03260.1…
GO:0010468	P	regulation of gene expression	131	979	2166	30241	1.7e-11	1e-09	// LOC_Os03g48235.1 // LOC_Os08g42400.2 // LOC_Os03g56050.1 // LOC_Os03g21970.1 // LOC_Os06g43220.1 // LOC_Os10g39030.1 // LOC_Os07g03770.1 // LOC_Os05g36900.1 // LOC_Os01g50720.1 // LOC_Os08g15020.1 // LOC_Os11g35390.1 // LOC_Os01g52680.1 // LOC_Os06g44750.1 // LOC_Os12g41060.1 // LOC_Os09g25070.1 // LOC_Os04g38740.1 // LOC_Os10g08026.1 // LOC_Os06g08340.1 // LOC_Os09g29820.1 // LOC_Os11g03300.1…
GO:0031323	P	regulation of cellular metabolic process	131	979	2173	30241	2.1e-11	1.2e-09	// LOC_Os03g48235.1 // LOC_Os08g42400.2 // LOC_Os03g56050.1 // LOC_Os03g21970.1 // LOC_Os06g43220.1 // LOC_Os10g39030.1 // LOC_Os07g03770.1 // LOC_Os05g36900.1 // LOC_Os01g50720.1 // LOC_Os08g15020.1 // LOC_Os11g35390.1 // LOC_Os01g52680.1 // LOC_Os06g44750.1 // LOC_Os12g41060.1 // LOC_Os09g25070.1 // LOC_Os04g38740.1 // LOC_Os06g08340.1 // LOC_Os09g29820.1 // LOC_Os11g03300.1 // LOC_Os03g03260.1…
GO:0080090	P	regulation of primary metabolic process	131	979	2224	30241	9.2e-11	4.6e-09	// LOC_Os03g48235.1 // LOC_Os08g42400.2 // LOC_Os03g56050.1 // LOC_Os03g21970.1 // LOC_Os06g43220.1 // LOC_Os10g39030.1 // LOC_Os07g03770.1 // LOC_Os05g36900.1 // LOC_Os01g50720.1 // LOC_Os08g15020.1 // LOC_Os11g35390.1 // LOC_Os01g52680.1 // LOC_Os06g44750.1 // LOC_Os12g41060.1 // LOC_Os09g25070.1 // LOC_Os04g38740.1 // LOC_Os06g08340.1 // LOC_Os09g29820.1 // LOC_Os11g03300.1 // LOC_Os03g03260.1…
GO:0060255	P	regulation of macromolecule metabolic process	132	979	2255	30241	1.1e-10	5.3e-09	// LOC_Os03g48235.1 // LOC_Os08g42400.2 // LOC_Os03g56050.1 // LOC_Os03g21970.1 // LOC_Os06g43220.1 // LOC_Os10g39030.1 // LOC_Os07g03770.1 // LOC_Os05g36900.1 // LOC_Os01g50720.1 // LOC_Os08g15020.1 // LOC_Os11g35390.1 // LOC_Os01g52680.1 // LOC_Os06g44750.1 // LOC_Os12g41060.1 // LOC_Os09g25070.1 // LOC_Os04g38740.1 // LOC_Os10g08026.1 // LOC_Os06g08340.1 // LOC_Os09g29820.1 // LOC_Os11g03300.1…
GO:0019222	P	regulation of metabolic process	133	979	2282	30241	1.2e-10	5.5e-09	// LOC_Os03g48235.1 // LOC_Os08g42400.2 // LOC_Os03g56050.1 // LOC_Os03g21970.1 // LOC_Os06g43220.1 // LOC_Os10g39030.1 // LOC_Os07g03770.1 // LOC_Os05g36900.1 // LOC_Os01g50720.1 // LOC_Os08g15020.1 // LOC_Os11g35390.1 // LOC_Os01g52680.1 // LOC_Os06g44750.1 // LOC_Os12g41060.1 // LOC_Os09g25070.1 // LOC_Os04g38740.1 // LOC_Os10g08026.1 // LOC_Os06g08340.1 // LOC_Os09g29820.1 // LOC_Os11g03300.1…
GO:0006350	P	transcription	129	979	2229	30241	3.8e-10	1.6e-08	// LOC_Os06g44010.1 // LOC_Os08g42400.2 // LOC_Os03g56050.1 // LOC_Os03g21970.1 // LOC_Os06g43220.1 // LOC_Os10g39030.1 // LOC_Os07g03770.1 // LOC_Os05g36900.1 // LOC_Os01g50720.1 // LOC_Os08g15020.1 // LOC_Os11g35390.1 // LOC_Os01g52680.1 // LOC_Os06g44750.1 // LOC_Os12g41060.1 // LOC_Os09g25070.1 // LOC_Os04g38740.1 // LOC_Os06g08340.1 // LOC_Os09g29820.1 // LOC_Os11g03300.1 // LOC_Os03g03260.1…
GO:0005975	P	carbohydrate metabolic process	88	979	1320	30241	6.8e-10	2.6e-08	// LOC_Os01g44970.1 // LOC_Os06g22060.1 // LOC_Os07g35480.2 // LOC_Os12g36810.1 // LOC_Os06g40890.1 // LOC_Os08g13980.1 // LOC_Os05g20020.1 // LOC_Os04g30770.1 // LOC_Os01g19170.1 // LOC_Os11g18730.1 // LOC_Os05g25480.1 // LOC_Os04g53950.2 // LOC_Os10g39840.1 // LOC_Os04g53950.1 // LOC_Os01g53750.1 // LOC_Os01g71830.1 // LOC_Os09g25490.1 // LOC_Os05g15920.1 // LOC_Os11g33270.1 // LOC_Os07g45260.1…
GO:0050789	P	regulation of biological process	145	979	2845	30241	7.4e-08	2.7e-06	// LOC_Os03g48235.1 // LOC_Os08g42400.2 // LOC_Os07g31470.1 // LOC_Os03g56050.1 // LOC_Os03g21970.1 // LOC_Os06g43220.1 // LOC_Os10g39030.1 // LOC_Os07g03770.1 // LOC_Os05g36900.1 // LOC_Os01g50720.1 // LOC_Os08g37970.1 // LOC_Os08g15020.1 // LOC_Os02g30850.1 // LOC_Os01g52680.1 // LOC_Os06g44750.1 // LOC_Os12g41060.1 // LOC_Os09g25070.1 // LOC_Os04g38740.1 // LOC_Os10g08026.1 // LOC_Os06g08340.1…
GO:0050794	P	regulation of cellular process	139	979	2709	30241	1e-07	3.5e-06	// LOC_Os03g48235.1 // LOC_Os08g42400.2 // LOC_Os07g31470.1 // LOC_Os03g56050.1 // LOC_Os03g21970.1 // LOC_Os06g43220.1 // LOC_Os10g39030.1 // LOC_Os07g03770.1 // LOC_Os05g36900.1 // LOC_Os01g50720.1 // LOC_Os08g37970.1 // LOC_Os08g15020.1 // LOC_Os02g30850.1 // LOC_Os01g52680.1 // LOC_Os06g44750.1 // LOC_Os12g41060.1 // LOC_Os09g25070.1 // LOC_Os04g38740.1 // LOC_Os06g08340.1 // LOC_Os09g29820.1…
GO:0065007	P	biological regulation	149	979	2989	30241	1.7e-07	5.8e-06	// LOC_Os03g48235.1 // LOC_Os01g52750.1 // LOC_Os08g42400.2 // LOC_Os07g31470.1 // LOC_Os03g56050.1 // LOC_Os03g21970.1 // LOC_Os06g43220.1 // LOC_Os10g39030.1 // LOC_Os07g03770.1 // LOC_Os05g36900.1 // LOC_Os01g50720.1 // LOC_Os08g37970.1 // LOC_Os08g15020.1 // LOC_Os02g30850.1 // LOC_Os01g52680.1 // LOC_Os06g44750.1 // LOC_Os12g41060.1 // LOC_Os09g25070.1 // LOC_Os04g38740.1 // LOC_Os10g08026.1…
GO:0071554	P	cell wall organization or biogenesis	20	979	149	30241	3.9e-07	1.2e-05	// LOC_Os04g46740.2 // LOC_Os04g41680.1 // LOC_Os06g10930.1 // LOC_Os08g34910.1 // LOC_Os01g20980.1 // LOC_Os06g50400.1 // LOC_Os06g09340.1 // LOC_Os03g60720.1 // LOC_Os04g46740.1 // LOC_Os09g37600.1 // LOC_Os04g15840.1 // LOC_Os05g19600.1 // LOC_Os02g39330.1 // LOC_Os01g36550.1 // LOC_Os06g10910.1 // LOC_Os06g10920.1 // LOC_Os08g34900.1 // LOC_Os05g19570.1 // LOC_Os04g41640.1 // LOC_Os06g41700.1
GO:0006629	P	lipid metabolic process	44	979	581	30241	6.5e-07	2e-05	// LOC_Os02g37800.1 // LOC_Os06g05630.1 // LOC_Os02g37654.1 // LOC_Os04g56240.1 // LOC_Os06g14630.1 // LOC_Os02g58790.1 // LOC_Os07g47210.1 // LOC_Os08g09950.1 // LOC_Os11g31940.1 // LOC_Os05g49840.1 // LOC_Os07g06800.1 // LOC_Os02g57110.1 // LOC_Os11g19340.1 // LOC_Os02g40440.1 // LOC_Os06g12410.1 // LOC_Os02g37780.1 // LOC_Os08g37250.1 // LOC_Os11g39990.1 // LOC_Os02g37770.1 // LOC_Os05g34700.1…
GO:0006950	P	response to stress	65	979	1053	30241	1.6e-06	4.6e-05	// LOC_Os03g36560.1 // LOC_Os03g63200.1 // LOC_Os03g25340.1 // LOC_Os02g14180.1 // LOC_Os08g38170.3 // LOC_Os12g08920.1 // LOC_Os08g10260.1 // LOC_Os07g01400.1 // LOC_Os01g18970.1 // LOC_Os03g25300.1 // LOC_Os01g73170.1 // LOC_Os05g04410.1 // LOC_Os03g22020.1 // LOC_Os03g25360.1 // LOC_Os11g06720.1 // LOC_Os04g34630.1 // LOC_Os01g19020.1 // LOC_Os03g02939.1 // LOC_Os10g39170.1 // LOC_Os11g18940.1…
GO:0050896	P	response to stimulus	73	979	1258	30241	3e-06	8.3e-05	// LOC_Os03g36560.1 // LOC_Os03g63200.1 // LOC_Os03g25340.1 // LOC_Os02g14180.1 // LOC_Os08g38170.3 // LOC_Os12g08920.1 // LOC_Os08g10260.1 // LOC_Os07g01400.1 // LOC_Os01g18970.1 // LOC_Os07g48030.1 // LOC_Os01g73170.1 // LOC_Os05g04410.1 // LOC_Os03g22020.1 // LOC_Os03g25360.1 // LOC_Os11g06720.1 // LOC_Os04g34630.1 // LOC_Os01g19020.1 // LOC_Os03g02939.1 // LOC_Os10g39170.1 // LOC_Os11g18940.1…
GO:0071555	P	cell wall organization	12	979	84	30241	4.7e-05	0.0013	// LOC_Os08g34910.1 // LOC_Os01g20980.1 // LOC_Os06g50400.1 // LOC_Os06g09340.1 // LOC_Os03g60720.1 // LOC_Os04g46740.1 // LOC_Os04g46740.2 // LOC_Os05g19600.1 // LOC_Os08g34900.1 // LOC_Os04g15840.1 // LOC_Os05g19570.1 // LOC_Os06g41700.1
GO:0019953	P	sexual reproduction	7	979	26	30241	6.1e-05	0.0016	// LOC_Os04g46630.1 // LOC_Os03g44290.1 // LOC_Os02g44108.1 // LOC_Os10g40720.1 // LOC_Os02g42650.1 // LOC_Os03g01260.1 // LOC_Os04g46650.1
GO:0006355	P	regulation of transcription, DNA-dependent	59	979	1101	30241	0.00021	0.0052	// LOC_Os10g42490.1 // LOC_Os02g12790.1 // LOC_Os01g45570.1 // LOC_Os09g28200.1 // LOC_Os11g05640.1 // LOC_Os03g56050.1 // LOC_Os03g10210.1 // LOC_Os06g43220.1 // LOC_Os04g48070.1 // LOC_Os01g57890.1 // LOC_Os03g51690.1 // LOC_Os10g39030.1 // LOC_Os06g36680.1 // LOC_Os07g03770.1 // LOC_Os03g08620.1 // LOC_Os06g44410.1 // LOC_Os03g08754.1 // LOC_Os03g07940.1 // LOC_Os01g52680.1 // LOC_Os02g42585.1…
GO:0051252	P	regulation of RNA metabolic process	59	979	1108	30241	0.00024	0.0058	// LOC_Os10g42490.1 // LOC_Os02g12790.1 // LOC_Os01g45570.1 // LOC_Os09g28200.1 // LOC_Os11g05640.1 // LOC_Os03g56050.1 // LOC_Os03g10210.1 // LOC_Os06g43220.1 // LOC_Os04g48070.1 // LOC_Os01g57890.1 // LOC_Os03g51690.1 // LOC_Os10g39030.1 // LOC_Os06g36680.1 // LOC_Os07g03770.1 // LOC_Os03g08620.1 // LOC_Os06g44410.1 // LOC_Os03g08754.1 // LOC_Os03g07940.1 // LOC_Os01g52680.1 // LOC_Os02g42585.1…
GO:0006351	P	transcription, DNA-dependent	59	979	1153	30241	0.00062	0.014	// LOC_Os10g42490.1 // LOC_Os02g12790.1 // LOC_Os01g45570.1 // LOC_Os09g28200.1 // LOC_Os11g05640.1 // LOC_Os03g56050.1 // LOC_Os03g10210.1 // LOC_Os06g43220.1 // LOC_Os04g48070.1 // LOC_Os01g57890.1 // LOC_Os03g51690.1 // LOC_Os10g39030.1 // LOC_Os06g36680.1 // LOC_Os07g03770.1 // LOC_Os03g08620.1 // LOC_Os06g44410.1 // LOC_Os03g08754.1 // LOC_Os03g07940.1 // LOC_Os01g52680.1 // LOC_Os02g42585.1…
GO:0032774	P	RNA biosynthetic process	59	979	1157	30241	0.00067	0.015	// LOC_Os10g42490.1 // LOC_Os02g12790.1 // LOC_Os01g45570.1 // LOC_Os09g28200.1 // LOC_Os11g05640.1 // LOC_Os03g56050.1 // LOC_Os03g10210.1 // LOC_Os06g43220.1 // LOC_Os04g48070.1 // LOC_Os01g57890.1 // LOC_Os03g51690.1 // LOC_Os10g39030.1 // LOC_Os06g36680.1 // LOC_Os07g03770.1 // LOC_Os03g08620.1 // LOC_Os06g44410.1 // LOC_Os03g08754.1 // LOC_Os03g07940.1 // LOC_Os01g52680.1 // LOC_Os02g42585.1…
GO:0006810	P	transport	100	979	2251	30241	0.0012	0.024	// LOC_Os04g55170.1 // LOC_Os03g25869.1 // LOC_Os12g44110.2 // LOC_Os09g29284.1 // LOC_Os10g40480.1 // LOC_Os03g52650.1 // LOC_Os10g40530.1 // LOC_Os03g48810.1 // LOC_Os03g03500.1 // LOC_Os12g03860.1 // LOC_Os03g14642.1 // LOC_Os03g57990.1 // LOC_Os10g36160.1 // LOC_Os05g05820.1 // LOC_Os03g64340.1 // LOC_Os10g40470.1 // LOC_Os10g40430.1 // LOC_Os10g14870.1 // LOC_Os11g05390.1 // LOC_Os04g38220.1…
GO:0051234	P	establishment of localization	100	979	2251	30241	0.0012	0.024	// LOC_Os04g55170.1 // LOC_Os03g25869.1 // LOC_Os12g44110.2 // LOC_Os09g29284.1 // LOC_Os10g40480.1 // LOC_Os03g52650.1 // LOC_Os10g40530.1 // LOC_Os03g48810.1 // LOC_Os03g03500.1 // LOC_Os12g03860.1 // LOC_Os03g14642.1 // LOC_Os03g57990.1 // LOC_Os10g36160.1 // LOC_Os05g05820.1 // LOC_Os03g64340.1 // LOC_Os10g40470.1 // LOC_Os10g40430.1 // LOC_Os10g14870.1 // LOC_Os11g05390.1 // LOC_Os04g38220.1…
GO:0051179	P	localization	101	979	2275	30241	0.0011	0.024	// LOC_Os04g55170.1 // LOC_Os03g25869.1 // LOC_Os12g44110.2 // LOC_Os09g29284.1 // LOC_Os10g40480.1 // LOC_Os03g52650.1 // LOC_Os10g40530.1 // LOC_Os03g48810.1 // LOC_Os03g03500.1 // LOC_Os12g03860.1 // LOC_Os03g14642.1 // LOC_Os03g57990.1 // LOC_Os10g36160.1 // LOC_Os05g05820.1 // LOC_Os03g64340.1 // LOC_Os10g40470.1 // LOC_Os10g40430.1 // LOC_Os10g14870.1 // LOC_Os11g05390.1 // LOC_Os04g38220.1…
GO:0071669	P	plant-type cell wall organization or biogenesis	6	979	33	30241	0.0013	0.025	// LOC_Os06g50400.1 // LOC_Os03g60720.1 // LOC_Os04g15840.1 // LOC_Os05g19600.1 // LOC_Os05g19570.1 // LOC_Os06g41700.1
GO:0009664	P	plant-type cell wall organization	6	979	33	30241	0.0013	0.025	// LOC_Os06g50400.1 // LOC_Os03g60720.1 // LOC_Os04g15840.1 // LOC_Os05g19600.1 // LOC_Os05g19570.1 // LOC_Os06g41700.1
GO:0005976	P	polysaccharide metabolic process	15	979	188	30241	0.002	0.037	// LOC_Os04g41680.1 // LOC_Os04g53950.2 // LOC_Os10g39840.1 // LOC_Os09g30130.1 // LOC_Os04g30770.1 // LOC_Os12g36890.1 // LOC_Os04g41640.1 // LOC_Os09g25490.1 // LOC_Os04g51520.1 // LOC_Os02g39330.1 // LOC_Os11g33270.1 // LOC_Os08g13980.1 // LOC_Os09g23220.1 // LOC_Os03g01800.1 // LOC_Os10g42670.1
GO:0010467	P	gene expression	138	979	3375	30241	0.0031	0.058	// LOC_Os03g48235.1 // LOC_Os08g42400.2 // LOC_Os03g56050.1 // LOC_Os03g21970.1 // LOC_Os06g43220.1 // LOC_Os10g39030.1 // LOC_Os07g03770.1 // LOC_Os05g36900.1 // LOC_Os01g50720.1 // LOC_Os08g15020.1 // LOC_Os11g35390.1 // LOC_Os01g52680.1 // LOC_Os06g44750.1 // LOC_Os12g41060.1 // LOC_Os09g25070.1 // LOC_Os04g38740.1 // LOC_Os10g08026.1 // LOC_Os06g08340.1 // LOC_Os09g29820.1 // LOC_Os11g03300.1…
GO:0005991	P	trehalose metabolic process	6	979	43	30241	0.0041	0.075	// LOC_Os10g40550.1 // LOC_Os09g25890.1 // LOC_Os10g37660.1 // LOC_Os12g32130.1 // LOC_Os05g03810.1 // LOC_Os02g51680.1
GO:0007018	P	microtubule-based movement	8	979	76	30241	0.0048	0.085	// LOC_Os12g39980.1 // LOC_Os01g33040.1 // LOC_Os01g42070.1 // LOC_Os03g39020.1 // LOC_Os02g56540.1 // LOC_Os12g42160.1 // LOC_Os05g38480.1 // LOC_Os03g02290.1
GO:0015833	P	peptide transport	11	979	133	30241	0.0058	0.097	// LOC_Os10g05780.1 // LOC_Os06g13210.1 // LOC_Os03g01290.1 // LOC_Os01g65110.1 // LOC_Os11g18044.1 // LOC_Os10g33170.1 // LOC_Os12g44110.2 // LOC_Os04g59480.1 // LOC_Os01g04950.3 // LOC_Os10g42900.1 // LOC_Os01g01360.1
GO:0006857	P	oligopeptide transport	11	979	133	30241	0.0058	0.097	// LOC_Os10g05780.1 // LOC_Os06g13210.1 // LOC_Os03g01290.1 // LOC_Os01g65110.1 // LOC_Os11g18044.1 // LOC_Os10g33170.1 // LOC_Os12g44110.2 // LOC_Os04g59480.1 // LOC_Os01g04950.3 // LOC_Os10g42900.1 // LOC_Os01g01360.1
GO:0006073	P	cellular glucan metabolic process	11	979	138	30241	0.0075	0.12	// LOC_Os04g53950.2 // LOC_Os10g39840.1 // LOC_Os09g30130.1 // LOC_Os12g36890.1 // LOC_Os09g25490.1 // LOC_Os04g51520.1 // LOC_Os11g33270.1 // LOC_Os08g13980.1 // LOC_Os09g23220.1 // LOC_Os03g01800.1 // LOC_Os10g42670.1
GO:0044042	P	glucan metabolic process	11	979	138	30241	0.0075	0.12	// LOC_Os04g53950.2 // LOC_Os10g39840.1 // LOC_Os09g30130.1 // LOC_Os12g36890.1 // LOC_Os09g25490.1 // LOC_Os04g51520.1 // LOC_Os11g33270.1 // LOC_Os08g13980.1 // LOC_Os09g23220.1 // LOC_Os03g01800.1 // LOC_Os10g42670.1
GO:0042545	P	cell wall modification	6	979	51	30241	0.0087	0.14	// LOC_Os04g46740.2 // LOC_Os08g34910.1 // LOC_Os01g20980.1 // LOC_Os04g46740.1 // LOC_Os06g09340.1 // LOC_Os08g34900.1
GO:0044264	P	cellular polysaccharide metabolic process	11	979	146	30241	0.011	0.17	// LOC_Os04g53950.2 // LOC_Os10g39840.1 // LOC_Os09g30130.1 // LOC_Os12g36890.1 // LOC_Os09g25490.1 // LOC_Os04g51520.1 // LOC_Os11g33270.1 // LOC_Os08g13980.1 // LOC_Os09g23220.1 // LOC_Os03g01800.1 // LOC_Os10g42670.1
GO:0033036	P	macromolecule localization	29	979	572	30241	0.015	0.21	// LOC_Os04g55170.1 // LOC_Os03g57970.1 // LOC_Os03g01320.1 // LOC_Os01g49640.1 // LOC_Os11g02400.2 // LOC_Os02g44320.1 // LOC_Os01g60740.1 // LOC_Os11g02369.1 // LOC_Os10g40480.1 // LOC_Os12g02330.2 // LOC_Os03g14654.1 // LOC_Os03g52650.1 // LOC_Os10g40530.1 // LOC_Os03g01300.1 // LOC_Os10g20890.1 // LOC_Os03g14642.1 // LOC_Os03g57990.1 // LOC_Os10g36160.1 // LOC_Os10g40440.1 // LOC_Os10g40520.1…
GO:0005984	P	disaccharide metabolic process	7	979	75	30241	0.015	0.21	// LOC_Os10g40550.1 // LOC_Os01g69030.1 // LOC_Os09g25890.1 // LOC_Os10g37660.1 // LOC_Os12g32130.1 // LOC_Os05g03810.1 // LOC_Os02g51680.1
GO:0005992	P	trehalose biosynthetic process	5	979	42	30241	0.016	0.21	// LOC_Os10g40550.1 // LOC_Os05g03810.1 // LOC_Os12g32130.1 // LOC_Os09g25890.1 // LOC_Os02g51680.1
GO:0016137	P	glycoside metabolic process	7	979	75	30241	0.015	0.21	// LOC_Os10g40550.1 // LOC_Os01g69030.1 // LOC_Os09g25890.1 // LOC_Os10g37660.1 // LOC_Os12g32130.1 // LOC_Os05g03810.1 // LOC_Os02g51680.1
GO:0016138	P	glycoside biosynthetic process	5	979	42	30241	0.016	0.21	// LOC_Os10g40550.1 // LOC_Os05g03810.1 // LOC_Os12g32130.1 // LOC_Os09g25890.1 // LOC_Os02g51680.1
GO:0046351	P	disaccharide biosynthetic process	5	979	42	30241	0.016	0.21	// LOC_Os10g40550.1 // LOC_Os05g03810.1 // LOC_Os12g32130.1 // LOC_Os09g25890.1 // LOC_Os02g51680.1
GO:0009312	P	oligosaccharide biosynthetic process	5	979	43	30241	0.017	0.22	// LOC_Os10g40550.1 // LOC_Os05g03810.1 // LOC_Os12g32130.1 // LOC_Os09g25890.1 // LOC_Os02g51680.1
GO:0009311	P	oligosaccharide metabolic process	7	979	78	30241	0.017	0.23	// LOC_Os10g40550.1 // LOC_Os01g69030.1 // LOC_Os09g25890.1 // LOC_Os10g37660.1 // LOC_Os12g32130.1 // LOC_Os05g03810.1 // LOC_Os02g51680.1
GO:0030001	P	metal ion transport	17	979	294	30241	0.02	0.25	// LOC_Os06g45940.1 // LOC_Os04g39370.1 // LOC_Os10g14870.1 // LOC_Os03g37840.1 // LOC_Os02g32814.1 // LOC_Os03g60480.1 // LOC_Os02g30650.1 // LOC_Os01g03490.1 // LOC_Os03g64340.1 // LOC_Os10g38870.1 // LOC_Os03g37830.1 // LOC_Os06g37010.1 // LOC_Os05g05820.1 // LOC_Os07g01214.1 // LOC_Os03g03500.1 // LOC_Os04g46940.1 // LOC_Os01g20830.1
GO:0016998	P	cell wall macromolecule catabolic process	5	979	46	30241	0.021	0.27	// LOC_Os09g37600.1 // LOC_Os04g41680.1 // LOC_Os04g41640.1 // LOC_Os02g39330.1 // LOC_Os01g36550.1
GO:0044036	P	cell wall macromolecule metabolic process	5	979	49	30241	0.027	0.33	// LOC_Os09g37600.1 // LOC_Os04g41680.1 // LOC_Os04g41640.1 // LOC_Os02g39330.1 // LOC_Os01g36550.1
GO:0000003	P	reproduction	9	979	131	30241	0.033	0.39	// LOC_Os12g03650.1 // LOC_Os04g46630.1 // LOC_Os03g44290.1 // LOC_Os01g66610.1 // LOC_Os02g44108.1 // LOC_Os10g40720.1 // LOC_Os02g42650.1 // LOC_Os03g01260.1 // LOC_Os04g46650.1
GO:0007017	P	microtubule-based process	8	979	113	30241	0.037	0.44	// LOC_Os12g39980.1 // LOC_Os01g33040.1 // LOC_Os01g42070.1 // LOC_Os03g39020.1 // LOC_Os02g56540.1 // LOC_Os12g42160.1 // LOC_Os05g38480.1 // LOC_Os03g02290.1
GO:0016051	P	carbohydrate biosynthetic process	13	979	229	30241	0.043	0.5	// LOC_Os10g40550.1 // LOC_Os09g25890.1 // LOC_Os03g20120.1 // LOC_Os10g40640.1 // LOC_Os07g45260.1 // LOC_Os09g30130.1 // LOC_Os12g36890.1 // LOC_Os09g25490.1 // LOC_Os05g03810.1 // LOC_Os03g08600.1 // LOC_Os12g32130.1 // LOC_Os10g13700.2 // LOC_Os02g51680.1
GO:0006811	P	ion transport	25	979	556	30241	0.071	0.81	// LOC_Os06g45940.1 // LOC_Os04g39370.1 // LOC_Os01g52130.1 // LOC_Os04g10750.1 // LOC_Os10g38870.1 // LOC_Os10g31040.2 // LOC_Os10g31040.1 // LOC_Os03g37840.1 // LOC_Os02g30650.1 // LOC_Os01g03490.1 // LOC_Os03g03500.1 // LOC_Os02g41710.1 // LOC_Os04g46940.1 // LOC_Os01g20830.1 // LOC_Os05g05820.1 // LOC_Os12g44300.1 // LOC_Os03g55100.1 // LOC_Os03g37830.1 // LOC_Os07g01214.1 // LOC_Os03g64340.1…
GO:0044281	P	small molecule metabolic process	28	979	1346	30241	1	1	// LOC_Os08g36320.1 // LOC_Os09g19930.1 // LOC_Os03g19420.2 // LOC_Os04g51400.1 // LOC_Os08g32750.1 // LOC_Os06g22060.1 // LOC_Os06g40640.2 // LOC_Os08g09950.1 // LOC_Os05g13970.2 // LOC_Os10g13700.2 // LOC_Os10g38920.1 // LOC_Os07g48980.1 // LOC_Os12g19304.1 // LOC_Os04g57400.1 // LOC_Os08g04560.1 // LOC_Os01g48530.1 // LOC_Os03g19427.1 // LOC_Os10g08026.1 // LOC_Os01g69030.1 // LOC_Os08g36320.2…
GO:0044283	P	small molecule biosynthetic process	7	979	380	30241	0.96	1	// LOC_Os03g19427.1 // LOC_Os03g19420.2 // LOC_Os07g48980.1 // LOC_Os12g19304.1 // LOC_Os04g57400.1 // LOC_Os04g42520.1 // LOC_Os10g13700.2
GO:0019725	P	cellular homeostasis	6	979	180	30241	0.53	1	// LOC_Os03g17860.2 // LOC_Os01g13480.1 // LOC_Os12g35330.1 // LOC_Os02g30850.1 // LOC_Os04g33680.1 // LOC_Os11g43520.1
GO:0032787	P	monocarboxylic acid metabolic process	5	979	111	30241	0.3	1	// LOC_Os08g09950.1 // LOC_Os03g19427.1 // LOC_Os07g48980.1 // LOC_Os10g13700.2 // LOC_Os03g19420.2
GO:0043436	P	oxoacid metabolic process	13	979	657	30241	0.98	1	// LOC_Os03g19427.1 // LOC_Os04g51400.1 // LOC_Os10g38920.1 // LOC_Os08g36320.2 // LOC_Os03g19420.2 // LOC_Os07g48980.1 // LOC_Os12g22600.1 // LOC_Os04g57400.1 // LOC_Os08g04560.1 // LOC_Os08g09950.1 // LOC_Os09g27510.1 // LOC_Os10g13700.2 // LOC_Os08g36320.1
GO:0046483	P	heterocycle metabolic process	5	979	365	30241	0.99	1	// LOC_Os04g42520.1 // LOC_Os03g19427.1 // LOC_Os07g48980.1 // LOC_Os01g48530.1 // LOC_Os03g19420.2
GO:0019538	P	protein metabolic process	121	979	7425	30241	1	1	// LOC_Os08g10310.1 // LOC_Os06g30130.1 // LOC_Os01g52750.1 // LOC_Os06g17490.1 // LOC_Os01g24570.1 // LOC_Os03g27190.1 // LOC_Os06g38990.1 // LOC_Os01g36550.1 // LOC_Os06g13180.1 // LOC_Os05g51740.1 // LOC_Os10g10540.1 // LOC_Os08g02440.1 // LOC_Os03g54130.1 // LOC_Os10g39150.1 // LOC_Os04g30160.1 // LOC_Os12g26940.1 // LOC_Os06g03080.1 // LOC_Os01g42320.1 // LOC_Os05g05820.1 // LOC_Os09g31019.1…
GO:0016052	P	carbohydrate catabolic process	8	979	198	30241	0.32	1	// LOC_Os04g41680.1 // LOC_Os01g69030.1 // LOC_Os06g22060.1 // LOC_Os04g30770.1 // LOC_Os06g40640.1 // LOC_Os06g40640.2 // LOC_Os02g39330.1 // LOC_Os04g41640.1
GO:0034641	P	cellular nitrogen compound metabolic process	13	979	702	30241	0.99	1	// LOC_Os03g19427.1 // LOC_Os04g51400.1 // LOC_Os08g36320.1 // LOC_Os08g36320.2 // LOC_Os03g19420.2 // LOC_Os07g48980.1 // LOC_Os12g19304.1 // LOC_Os06g40180.1 // LOC_Os04g57400.1 // LOC_Os12g22600.1 // LOC_Os04g42520.1 // LOC_Os09g27510.1 // LOC_Os10g38920.1
GO:0006807	P	nitrogen compound metabolic process	160	979	8092	30241	1	1	// LOC_Os06g44010.1 // LOC_Os08g36320.1 // LOC_Os08g36320.2 // LOC_Os04g14810.1 // LOC_Os08g42400.2 // LOC_Os03g56050.1 // LOC_Os03g21970.1 // LOC_Os06g43220.1 // LOC_Os10g39030.1 // LOC_Os07g03770.1 // LOC_Os05g36900.1 // LOC_Os01g50720.1 // LOC_Os03g20080.1 // LOC_Os08g15020.1 // LOC_Os11g35390.1 // LOC_Os01g52680.1 // LOC_Os04g57400.1 // LOC_Os06g44750.1 // LOC_Os12g41060.1 // LOC_Os09g25070.1…
GO:0044267	P	cellular protein metabolic process	78	979	4057	30241	1	1	// LOC_Os03g48235.1 // LOC_Os08g10310.1 // LOC_Os01g66020.1 // LOC_Os06g30130.1 // LOC_Os01g66860.2 // LOC_Os10g38920.1 // LOC_Os06g17490.1 // LOC_Os04g35890.1 // LOC_Os10g33620.1 // LOC_Os01g16650.1 // LOC_Os12g44090.1 // LOC_Os05g44930.1 // LOC_Os05g14220.1 // LOC_Os05g44990.1 // LOC_Os02g56380.1 // LOC_Os10g21090.1 // LOC_Os06g38990.1 // LOC_Os01g36550.1 // LOC_Os10g38960.1 // LOC_Os01g09580.2…
GO:0044265	P	cellular macromolecule catabolic process	5	979	345	30241	0.99	1	// LOC_Os06g40640.1 // LOC_Os06g40640.2 // LOC_Os01g69030.1 // LOC_Os08g41560.1 // LOC_Os06g22060.1
GO:0044262	P	cellular carbohydrate metabolic process	25	979	578	30241	0.097	1	// LOC_Os09g30130.1 // LOC_Os02g30780.1 // LOC_Os06g40640.1 // LOC_Os06g40640.2 // LOC_Os04g53950.2 // LOC_Os10g37660.1 // LOC_Os10g13700.2 // LOC_Os10g40550.1 // LOC_Os08g13980.1 // LOC_Os04g51520.1 // LOC_Os12g32130.1 // LOC_Os02g51680.1 // LOC_Os01g69030.1 // LOC_Os10g39840.1 // LOC_Os12g36890.1 // LOC_Os09g25490.1 // LOC_Os11g33270.1 // LOC_Os03g01800.1 // LOC_Os05g03810.1 // LOC_Os09g25890.1…
GO:0044260	P	cellular macromolecule metabolic process	230	979	11335	30241	1	1	// LOC_Os03g48235.1 // LOC_Os06g30130.1 // LOC_Os08g42400.2 // LOC_Os03g56050.1 // LOC_Os03g21970.1 // LOC_Os06g22060.1 // LOC_Os06g43220.1 // LOC_Os01g36550.1 // LOC_Os10g39030.1 // LOC_Os07g03770.1 // LOC_Os08g13980.1 // LOC_Os10g10540.1 // LOC_Os01g50720.1 // LOC_Os08g02440.1 // LOC_Os03g20080.1 // LOC_Os08g15020.1 // LOC_Os11g35390.1 // LOC_Os01g52680.1 // LOC_Os06g44750.1 // LOC_Os04g30160.1…
GO:0065009	P	regulation of molecular function	5	979	156	30241	0.57	1	// LOC_Os09g30458.1 // LOC_Os02g10520.1 // LOC_Os01g58290.1 // LOC_Os12g12260.2 // LOC_Os01g52750.1
GO:0065008	P	regulation of biological quality	7	979	255	30241	0.72	1	// LOC_Os03g17860.2 // LOC_Os01g13480.1 // LOC_Os12g35330.1 // LOC_Os02g30850.1 // LOC_Os11g43520.1 // LOC_Os12g44300.1 // LOC_Os04g33680.1
GO:0016265	P	death	9	979	569	30241	0.99	1	// LOC_Os11g12340.1 // LOC_Os11g16530.1 // LOC_Os08g10260.1 // LOC_Os03g63200.1 // LOC_Os12g18360.1 // LOC_Os04g25900.1 // LOC_Os01g52330.1 // LOC_Os01g16400.1 // LOC_Os02g10350.1
GO:0050790	P	regulation of catalytic activity	5	979	155	30241	0.57	1	// LOC_Os09g30458.1 // LOC_Os02g10520.1 // LOC_Os01g58290.1 // LOC_Os12g12260.2 // LOC_Os01g52750.1
GO:0009308	P	amine metabolic process	15	979	588	30241	0.85	1	// LOC_Os04g41680.1 // LOC_Os03g19427.1 // LOC_Os04g51400.1 // LOC_Os04g41640.1 // LOC_Os08g36320.1 // LOC_Os08g36320.2 // LOC_Os04g30770.1 // LOC_Os03g19420.2 // LOC_Os07g48980.1 // LOC_Os12g22600.1 // LOC_Os06g40180.1 // LOC_Os04g57400.1 // LOC_Os02g39330.1 // LOC_Os09g27510.1 // LOC_Os10g38920.1
GO:0006812	P	cation transport	19	979	450	30241	0.16	1	// LOC_Os06g45940.1 // LOC_Os04g39370.1 // LOC_Os10g14870.1 // LOC_Os03g37840.1 // LOC_Os02g32814.1 // LOC_Os03g60480.1 // LOC_Os02g30650.1 // LOC_Os01g03490.1 // LOC_Os03g64340.1 // LOC_Os10g38870.1 // LOC_Os03g37830.1 // LOC_Os06g37010.1 // LOC_Os05g05820.1 // LOC_Os07g01214.1 // LOC_Os03g03500.1 // LOC_Os12g44300.1 // LOC_Os01g03914.2 // LOC_Os04g46940.1 // LOC_Os01g20830.1
GO:0006952	P	defense response	9	979	513	30241	0.98	1	// LOC_Os12g36880.1 // LOC_Os11g12340.1 // LOC_Os11g16530.1 // LOC_Os08g10260.1 // LOC_Os03g63200.1 // LOC_Os12g18360.1 // LOC_Os04g25900.1 // LOC_Os03g18850.1 // LOC_Os01g16400.1
GO:0012501	P	programmed cell death	8	979	554	30241	1	1	// LOC_Os11g12340.1 // LOC_Os11g16530.1 // LOC_Os08g10260.1 // LOC_Os03g63200.1 // LOC_Os12g18360.1 // LOC_Os04g25900.1 // LOC_Os01g52330.1 // LOC_Os01g16400.1
GO:0043412	P	macromolecule modification	69	979	2726	30241	0.99	1	// LOC_Os08g10310.1 // LOC_Os01g66020.1 // LOC_Os06g30130.1 // LOC_Os01g66860.2 // LOC_Os10g38920.1 // LOC_Os06g17490.1 // LOC_Os04g35890.1 // LOC_Os10g33620.1 // LOC_Os01g16650.1 // LOC_Os12g44090.1 // LOC_Os05g44930.1 // LOC_Os05g14220.1 // LOC_Os05g44990.1 // LOC_Os02g56380.1 // LOC_Os10g21090.1 // LOC_Os06g38990.1 // LOC_Os01g36550.1 // LOC_Os10g38960.1 // LOC_Os01g09580.2 // LOC_Os01g09580.1…
GO:0008152	P	metabolic process	516	979	17445	30241	1	1	// LOC_Os01g54230.1 // LOC_Os06g30130.1 // LOC_Os03g57220.1 // LOC_Os07g31470.1 // LOC_Os01g41430.1 // LOC_Os03g19250.1 // LOC_Os01g36550.1 // LOC_Os02g47310.1 // LOC_Os06g16000.1 // LOC_Os07g03770.1 // LOC_Os11g08569.1 // LOC_Os08g02440.1 // LOC_Os08g15020.1 // LOC_Os10g39150.1 // LOC_Os05g03884.1 // LOC_Os01g22954.1 // LOC_Os10g39840.1 // LOC_Os09g29820.1 // LOC_Os09g25490.1 // LOC_Os12g05680.1…
GO:0044271	P	cellular nitrogen compound biosynthetic process	5	979	343	30241	0.99	1	// LOC_Os04g42520.1 // LOC_Os03g19427.1 // LOC_Os03g19420.2 // LOC_Os07g48980.1 // LOC_Os04g57400.1
GO:0006519	P	cellular amino acid and derivative metabolic process	13	979	569	30241	0.92	1	// LOC_Os02g20360.1 // LOC_Os03g19427.1 // LOC_Os04g51400.1 // LOC_Os10g38920.1 // LOC_Os08g36320.2 // LOC_Os03g19420.2 // LOC_Os07g48980.1 // LOC_Os12g22600.1 // LOC_Os06g40180.1 // LOC_Os04g57400.1 // LOC_Os08g04560.1 // LOC_Os09g27510.1 // LOC_Os08g36320.1
GO:0016310	P	phosphorylation	65	979	2283	30241	0.87	1	// LOC_Os08g10310.1 // LOC_Os01g66020.1 // LOC_Os06g30130.1 // LOC_Os01g66860.2 // LOC_Os10g38920.1 // LOC_Os06g17490.1 // LOC_Os04g35890.1 // LOC_Os12g44090.1 // LOC_Os05g44930.1 // LOC_Os05g14220.1 // LOC_Os05g44990.1 // LOC_Os02g56380.1 // LOC_Os10g21090.1 // LOC_Os06g38990.1 // LOC_Os01g36550.1 // LOC_Os10g38960.1 // LOC_Os01g09580.2 // LOC_Os01g09580.1 // LOC_Os04g30010.1 // LOC_Os04g30240.1…
GO:0044248	P	cellular catabolic process	7	979	432	30241	0.99	1	// LOC_Os08g41560.1 // LOC_Os01g54230.1 // LOC_Os01g69030.1 // LOC_Os01g02050.1 // LOC_Os06g22060.1 // LOC_Os06g40640.1 // LOC_Os06g40640.2
GO:0044249	P	cellular biosynthetic process	154	979	6858	30241	1	1	// LOC_Os03g48235.1 // LOC_Os08g42400.2 // LOC_Os03g56050.1 // LOC_Os03g21970.1 // LOC_Os06g43220.1 // LOC_Os10g39030.1 // LOC_Os07g03770.1 // LOC_Os05g36900.1 // LOC_Os01g50720.1 // LOC_Os08g15020.1 // LOC_Os11g35390.1 // LOC_Os01g52680.1 // LOC_Os06g44750.1 // LOC_Os12g41060.1 // LOC_Os09g25070.1 // LOC_Os05g03884.1 // LOC_Os06g08340.1 // LOC_Os09g29820.1 // LOC_Os11g03300.1 // LOC_Os03g03260.1…
GO:0023052	P	signaling	9	979	694	30241	1	1	// LOC_Os12g12260.2 // LOC_Os07g22580.1 // LOC_Os06g44410.1 // LOC_Os12g34840.1 // LOC_Os02g42060.1 // LOC_Os01g66610.1 // LOC_Os12g03650.1 // LOC_Os11g31940.1 // LOC_Os04g36070.1
GO:0034645	P	cellular macromolecule biosynthetic process	141	979	6096	30241	1	1	// LOC_Os03g48235.1 // LOC_Os08g42400.2 // LOC_Os03g56050.1 // LOC_Os03g21970.1 // LOC_Os06g43220.1 // LOC_Os10g39030.1 // LOC_Os07g03770.1 // LOC_Os05g36900.1 // LOC_Os01g50720.1 // LOC_Os08g15020.1 // LOC_Os11g35390.1 // LOC_Os01g52680.1 // LOC_Os06g44750.1 // LOC_Os12g41060.1 // LOC_Os09g25070.1 // LOC_Os05g03884.1 // LOC_Os06g08340.1 // LOC_Os09g29820.1 // LOC_Os11g03300.1 // LOC_Os03g03260.1…
GO:0006139	P	nucleobase, nucleoside, nucleotide and nucleic acid metabolic process	147	979	7524	30241	1	1	// LOC_Os06g44010.1 // LOC_Os04g14810.1 // LOC_Os08g42400.2 // LOC_Os03g56050.1 // LOC_Os03g21970.1 // LOC_Os06g43220.1 // LOC_Os10g39030.1 // LOC_Os07g03770.1 // LOC_Os05g36900.1 // LOC_Os01g50720.1 // LOC_Os03g20080.1 // LOC_Os08g15020.1 // LOC_Os11g35390.1 // LOC_Os01g52680.1 // LOC_Os06g44750.1 // LOC_Os12g41060.1 // LOC_Os09g25070.1 // LOC_Os04g38740.1 // LOC_Os10g08026.1 // LOC_Os06g08340.1…
GO:0009057	P	macromolecule catabolic process	9	979	422	30241	0.93	1	// LOC_Os04g41680.1 // LOC_Os08g41560.1 // LOC_Os01g69030.1 // LOC_Os06g22060.1 // LOC_Os04g30770.1 // LOC_Os06g40640.1 // LOC_Os06g40640.2 // LOC_Os02g39330.1 // LOC_Os04g41640.1
GO:0006508	P	proteolysis	43	979	3522	30241	1	1	// LOC_Os01g24600.1 // LOC_Os09g29710.1 // LOC_Os07g14610.1 // LOC_Os09g39160.1 // LOC_Os01g58290.1 // LOC_Os01g22980.1 // LOC_Os01g24570.1 // LOC_Os02g10520.1 // LOC_Os03g27190.1 // LOC_Os03g28980.1 // LOC_Os11g24180.1 // LOC_Os06g13180.1 // LOC_Os08g41560.1 // LOC_Os01g24560.1 // LOC_Os10g39260.1 // LOC_Os08g36540.1 // LOC_Os03g44290.1 // LOC_Os03g52070.1 // LOC_Os03g54130.1 // LOC_Os10g39150.1…
GO:0015672	P	monovalent inorganic cation transport	5	979	235	30241	0.87	1	// LOC_Os03g37840.1 // LOC_Os07g01214.1 // LOC_Os06g45940.1 // LOC_Os03g37830.1 // LOC_Os12g44300.1
GO:0016070	P	RNA metabolic process	63	979	1627	30241	0.089	1	// LOC_Os10g42490.1 // LOC_Os02g12790.1 // LOC_Os10g38920.1 // LOC_Os09g28200.1 // LOC_Os11g05640.1 // LOC_Os03g56050.1 // LOC_Os03g10210.1 // LOC_Os06g43220.1 // LOC_Os04g48070.1 // LOC_Os01g57890.1 // LOC_Os03g51690.1 // LOC_Os10g39030.1 // LOC_Os06g36680.1 // LOC_Os07g03770.1 // LOC_Os03g08620.1 // LOC_Os06g44410.1 // LOC_Os03g08754.1 // LOC_Os03g07940.1 // LOC_Os01g52680.1 // LOC_Os02g42585.1…
GO:0043687	P	post-translational protein modification	64	979	2387	30241	0.95	1	// LOC_Os08g10310.1 // LOC_Os01g66020.1 // LOC_Os06g30130.1 // LOC_Os01g66860.2 // LOC_Os10g38920.1 // LOC_Os06g17490.1 // LOC_Os04g35890.1 // LOC_Os01g16650.1 // LOC_Os12g44090.1 // LOC_Os05g44930.1 // LOC_Os05g14220.1 // LOC_Os05g44990.1 // LOC_Os02g56380.1 // LOC_Os10g21090.1 // LOC_Os06g38990.1 // LOC_Os01g36550.1 // LOC_Os10g38960.1 // LOC_Os01g09580.2 // LOC_Os01g09580.1 // LOC_Os04g30010.1…
GO:0009987	P	cellular process	312	979	15127	30241	1	1	// LOC_Os03g48235.1 // LOC_Os01g54230.1 // LOC_Os09g25150.1 // LOC_Os06g30130.1 // LOC_Os08g36320.1 // LOC_Os08g36320.2 // LOC_Os12g02230.1 // LOC_Os08g42400.2 // LOC_Os01g64670.1 // LOC_Os03g56050.1 // LOC_Os03g21970.1 // LOC_Os06g22060.1 // LOC_Os04g14810.1 // LOC_Os06g43220.1 // LOC_Os01g36550.1 // LOC_Os10g37660.1 // LOC_Os09g29284.1 // LOC_Os07g03770.1 // LOC_Os08g13980.1 // LOC_Os04g38810.1…
GO:0034637	P	cellular carbohydrate biosynthetic process	9	979	174	30241	0.12	1	// LOC_Os10g40550.1 // LOC_Os09g25890.1 // LOC_Os09g30130.1 // LOC_Os12g36890.1 // LOC_Os09g25490.1 // LOC_Os05g03810.1 // LOC_Os12g32130.1 // LOC_Os10g13700.2 // LOC_Os02g51680.1
GO:0023046	P	signaling process	6	979	499	30241	1	1	// LOC_Os12g12260.2 // LOC_Os07g22580.1 // LOC_Os06g44410.1 // LOC_Os12g34840.1 // LOC_Os02g42060.1 // LOC_Os04g36070.1
GO:0045454	P	cell redox homeostasis	6	979	159	30241	0.42	1	// LOC_Os03g17860.2 // LOC_Os01g13480.1 // LOC_Os12g35330.1 // LOC_Os02g30850.1 // LOC_Os04g33680.1 // LOC_Os11g43520.1
GO:0055086	P	nucleobase, nucleoside and nucleotide metabolic process	5	979	243	30241	0.89	1	// LOC_Os05g13970.1 // LOC_Os04g42520.1 // LOC_Os05g13970.2 // LOC_Os01g48530.1 // LOC_Os12g19304.1
GO:0006082	P	organic acid metabolic process	13	979	658	30241	0.98	1	// LOC_Os03g19427.1 // LOC_Os04g51400.1 // LOC_Os10g38920.1 // LOC_Os08g36320.2 // LOC_Os03g19420.2 // LOC_Os07g48980.1 // LOC_Os12g22600.1 // LOC_Os04g57400.1 // LOC_Os08g04560.1 // LOC_Os08g09950.1 // LOC_Os09g27510.1 // LOC_Os10g13700.2 // LOC_Os08g36320.1
GO:0005996	P	monosaccharide metabolic process	6	979	238	30241	0.78	1	// LOC_Os01g69030.1 // LOC_Os06g22060.1 // LOC_Os09g35800.1 // LOC_Os06g40640.1 // LOC_Os06g40640.2 // LOC_Os10g13700.2
GO:0043170	P	macromolecule metabolic process	278	979	12936	30241	1	1	// LOC_Os03g48235.1 // LOC_Os06g30130.1 // LOC_Os01g52750.1 // LOC_Os08g42400.2 // LOC_Os03g52070.1 // LOC_Os03g56050.1 // LOC_Os01g24570.1 // LOC_Os03g21970.1 // LOC_Os06g22060.1 // LOC_Os07g44360.1 // LOC_Os03g27190.1 // LOC_Os06g43220.1 // LOC_Os01g36550.1 // LOC_Os06g13180.1 // LOC_Os10g39030.1 // LOC_Os07g03770.1 // LOC_Os08g13980.1 // LOC_Os10g10540.1 // LOC_Os01g50720.1 // LOC_Os08g02440.1…
GO:0006006	P	glucose metabolic process	5	979	180	30241	0.69	1	// LOC_Os06g40640.1 // LOC_Os06g40640.2 // LOC_Os01g69030.1 // LOC_Os10g13700.2 // LOC_Os06g22060.1
GO:0044106	P	cellular amine metabolic process	11	979	538	30241	0.96	1	// LOC_Os03g19427.1 // LOC_Os04g51400.1 // LOC_Os08g36320.1 // LOC_Os08g36320.2 // LOC_Os03g19420.2 // LOC_Os07g48980.1 // LOC_Os12g22600.1 // LOC_Os06g40180.1 // LOC_Os04g57400.1 // LOC_Os09g27510.1 // LOC_Os10g38920.1
GO:0019752	P	carboxylic acid metabolic process	13	979	657	30241	0.98	1	// LOC_Os03g19427.1 // LOC_Os04g51400.1 // LOC_Os10g38920.1 // LOC_Os08g36320.2 // LOC_Os03g19420.2 // LOC_Os07g48980.1 // LOC_Os12g22600.1 // LOC_Os04g57400.1 // LOC_Os08g04560.1 // LOC_Os08g09950.1 // LOC_Os09g27510.1 // LOC_Os10g13700.2 // LOC_Os08g36320.1
GO:0042592	P	homeostatic process	7	979	217	30241	0.56	1	// LOC_Os03g17860.2 // LOC_Os01g13480.1 // LOC_Os12g35330.1 // LOC_Os02g30850.1 // LOC_Os11g43520.1 // LOC_Os12g44300.1 // LOC_Os04g33680.1
GO:0008219	P	cell death	9	979	569	30241	0.99	1	// LOC_Os11g12340.1 // LOC_Os11g16530.1 // LOC_Os08g10260.1 // LOC_Os03g63200.1 // LOC_Os12g18360.1 // LOC_Os04g25900.1 // LOC_Os01g52330.1 // LOC_Os01g16400.1 // LOC_Os02g10350.1
GO:0006091	P	generation of precursor metabolites and energy	6	979	382	30241	0.98	1	// LOC_Os01g54230.1 // LOC_Os01g69030.1 // LOC_Os01g02050.1 // LOC_Os06g22060.1 // LOC_Os06g40640.1 // LOC_Os06g40640.2
GO:0006520	P	cellular amino acid metabolic process	7	979	490	30241	1	1	// LOC_Os08g36320.1 // LOC_Os08g36320.2 // LOC_Os04g51400.1 // LOC_Os12g22600.1 // LOC_Os04g57400.1 // LOC_Os09g27510.1 // LOC_Os10g38920.1
GO:0006468	P	protein amino acid phosphorylation	63	979	2091	30241	0.74	1	// LOC_Os08g10310.1 // LOC_Os01g66020.1 // LOC_Os06g30130.1 // LOC_Os01g66860.2 // LOC_Os10g38920.1 // LOC_Os06g17490.1 // LOC_Os04g35890.1 // LOC_Os12g44090.1 // LOC_Os05g44930.1 // LOC_Os05g14220.1 // LOC_Os05g44990.1 // LOC_Os02g56380.1 // LOC_Os10g21090.1 // LOC_Os06g38990.1 // LOC_Os01g36550.1 // LOC_Os10g38960.1 // LOC_Os01g09580.2 // LOC_Os01g09580.1 // LOC_Os04g30010.1 // LOC_Os04g30240.1…
GO:0019318	P	hexose metabolic process	6	979	210	30241	0.67	1	// LOC_Os01g69030.1 // LOC_Os06g22060.1 // LOC_Os09g35800.1 // LOC_Os06g40640.1 // LOC_Os06g40640.2 // LOC_Os10g13700.2
GO:0006915	P	apoptosis	8	979	554	30241	1	1	// LOC_Os11g12340.1 // LOC_Os11g16530.1 // LOC_Os08g10260.1 // LOC_Os03g63200.1 // LOC_Os12g18360.1 // LOC_Os04g25900.1 // LOC_Os01g52330.1 // LOC_Os01g16400.1
GO:0006464	P	protein modification process	68	979	2662	30241	0.98	1	// LOC_Os08g10310.1 // LOC_Os01g66020.1 // LOC_Os06g30130.1 // LOC_Os01g66860.2 // LOC_Os10g38920.1 // LOC_Os06g17490.1 // LOC_Os04g35890.1 // LOC_Os10g33620.1 // LOC_Os01g16650.1 // LOC_Os12g44090.1 // LOC_Os05g44930.1 // LOC_Os05g14220.1 // LOC_Os05g44990.1 // LOC_Os02g56380.1 // LOC_Os10g21090.1 // LOC_Os06g38990.1 // LOC_Os01g36550.1 // LOC_Os10g38960.1 // LOC_Os01g09580.2 // LOC_Os01g09580.1…
GO:0023060	P	signal transmission	6	979	499	30241	1	1	// LOC_Os12g12260.2 // LOC_Os07g22580.1 // LOC_Os06g44410.1 // LOC_Os12g34840.1 // LOC_Os02g42060.1 // LOC_Os04g36070.1
GO:0009058	P	biosynthetic process	169	979	7161	30241	1	1	// LOC_Os03g48235.1 // LOC_Os08g42400.2 // LOC_Os03g56050.1 // LOC_Os03g21970.1 // LOC_Os06g43220.1 // LOC_Os07g34260.1 // LOC_Os10g39030.1 // LOC_Os07g03770.1 // LOC_Os11g32650.1 // LOC_Os05g36900.1 // LOC_Os01g50720.1 // LOC_Os08g15020.1 // LOC_Os11g35390.1 // LOC_Os01g52680.1 // LOC_Os06g44750.1 // LOC_Os12g41060.1 // LOC_Os09g25070.1 // LOC_Os05g03884.1 // LOC_Os06g08340.1 // LOC_Os09g29820.1…
GO:0009059	P	macromolecule biosynthetic process	141	979	6103	30241	1	1	// LOC_Os03g48235.1 // LOC_Os08g42400.2 // LOC_Os03g56050.1 // LOC_Os03g21970.1 // LOC_Os06g43220.1 // LOC_Os10g39030.1 // LOC_Os07g03770.1 // LOC_Os05g36900.1 // LOC_Os01g50720.1 // LOC_Os08g15020.1 // LOC_Os11g35390.1 // LOC_Os01g52680.1 // LOC_Os06g44750.1 // LOC_Os12g41060.1 // LOC_Os09g25070.1 // LOC_Os05g03884.1 // LOC_Os06g08340.1 // LOC_Os09g29820.1 // LOC_Os11g03300.1 // LOC_Os03g03260.1…
GO:0009056	P	catabolic process	15	979	553	30241	0.79	1	// LOC_Os04g41680.1 // LOC_Os08g41560.1 // LOC_Os01g54230.1 // LOC_Os01g69030.1 // LOC_Os01g02050.1 // LOC_Os11g34440.1 // LOC_Os06g22060.1 // LOC_Os04g30770.1 // LOC_Os06g40640.1 // LOC_Os06g40640.2 // LOC_Os02g39330.1 // LOC_Os01g36550.1 // LOC_Os09g37600.1 // LOC_Os04g41640.1 // LOC_Os01g04950.3
GO:0044238	P	primary metabolic process	402	979	14927	30241	1	1	// LOC_Os06g30130.1 // LOC_Os07g31470.1 // LOC_Os01g36550.1 // LOC_Os10g37660.1 // LOC_Os07g03770.1 // LOC_Os08g02440.1 // LOC_Os08g15020.1 // LOC_Os10g39150.1 // LOC_Os01g24560.1 // LOC_Os05g03884.1 // LOC_Os10g39840.1 // LOC_Os09g29820.1 // LOC_Os09g25490.1 // LOC_Os12g05680.1 // LOC_Os11g33270.1 // LOC_Os11g01620.1 // LOC_Os10g07556.1 // LOC_Os09g30458.1 // LOC_Os06g25010.1 // LOC_Os04g46060.1…
GO:0042180	P	cellular ketone metabolic process	13	979	662	30241	0.98	1	// LOC_Os03g19427.1 // LOC_Os04g51400.1 // LOC_Os10g38920.1 // LOC_Os08g36320.2 // LOC_Os03g19420.2 // LOC_Os07g48980.1 // LOC_Os12g22600.1 // LOC_Os04g57400.1 // LOC_Os08g04560.1 // LOC_Os08g09950.1 // LOC_Os09g27510.1 // LOC_Os10g13700.2 // LOC_Os08g36320.1
GO:0044237	P	cellular metabolic process	275	979	13193	30241	1	1	// LOC_Os03g48235.1 // LOC_Os01g54230.1 // LOC_Os09g25150.1 // LOC_Os06g30130.1 // LOC_Os08g36320.1 // LOC_Os08g36320.2 // LOC_Os12g02230.1 // LOC_Os08g42400.2 // LOC_Os01g64670.1 // LOC_Os03g56050.1 // LOC_Os03g21970.1 // LOC_Os06g22060.1 // LOC_Os04g14810.1 // LOC_Os06g43220.1 // LOC_Os01g36550.1 // LOC_Os10g37660.1 // LOC_Os10g39030.1 // LOC_Os07g03770.1 // LOC_Os08g13980.1 // LOC_Os10g10540.1…
GO:0006066	P	alcohol metabolic process	8	979	299	30241	0.75	1	// LOC_Os01g69030.1 // LOC_Os09g19930.1 // LOC_Os06g22060.1 // LOC_Os09g35800.1 // LOC_Os06g40180.1 // LOC_Os06g40640.1 // LOC_Os06g40640.2 // LOC_Os10g13700.2
GO:0006796	P	phosphate metabolic process	69	979	2457	30241	0.9	1	// LOC_Os08g10310.1 // LOC_Os12g02230.1 // LOC_Os01g66020.1 // LOC_Os06g30130.1 // LOC_Os01g66860.2 // LOC_Os10g38920.1 // LOC_Os03g39020.1 // LOC_Os01g64670.1 // LOC_Os04g35890.1 // LOC_Os12g44090.1 // LOC_Os05g44930.1 // LOC_Os05g14220.1 // LOC_Os05g44990.1 // LOC_Os02g56380.1 // LOC_Os10g21090.1 // LOC_Os06g38990.1 // LOC_Os01g36550.1 // LOC_Os10g38960.1 // LOC_Os01g09580.2 // LOC_Os01g09580.1…
GO:0006793	P	phosphorus metabolic process	69	979	2457	30241	0.9	1	// LOC_Os08g10310.1 // LOC_Os12g02230.1 // LOC_Os01g66020.1 // LOC_Os06g30130.1 // LOC_Os01g66860.2 // LOC_Os10g38920.1 // LOC_Os03g39020.1 // LOC_Os01g64670.1 // LOC_Os04g35890.1 // LOC_Os12g44090.1 // LOC_Os05g44930.1 // LOC_Os05g14220.1 // LOC_Os05g44990.1 // LOC_Os02g56380.1 // LOC_Os10g21090.1 // LOC_Os06g38990.1 // LOC_Os01g36550.1 // LOC_Os10g38960.1 // LOC_Os01g09580.2 // LOC_Os01g09580.1…
GO:0006259	P	DNA metabolic process	8	979	4586	30241	1	1	// LOC_Os09g25290.1 // LOC_Os10g08026.1 // LOC_Os03g21419.1 // LOC_Os08g38170.3 // LOC_Os03g20080.1 // LOC_Os08g38170.1 // LOC_Os02g10800.1 // LOC_Os08g17990.1
GO:0006412	P	translation	7	979	891	30241	1	1	// LOC_Os03g48235.1 // LOC_Os07g34620.1 // LOC_Os12g22600.1 // LOC_Os10g38920.1 // LOC_Os09g31019.1 // LOC_Os09g27510.1 // LOC_Os01g16400.1
GO:0046906	F	tetrapyrrole binding	86	979	741	30241	1.8e-22	6e-20	// LOC_Os02g14180.1 // LOC_Os02g47470.2 // LOC_Os03g12500.1 // LOC_Os01g11270.1 // LOC_Os10g34480.1 // LOC_Os02g09220.1 // LOC_Os10g39160.1 // LOC_Os03g25370.1 // LOC_Os02g42740.1 // LOC_Os01g72760.1 // LOC_Os06g35480.1 // LOC_Os02g09250.1 // LOC_Os12g05440.1 // LOC_Os07g28160.1 // LOC_Os05g41990.1 // LOC_Os01g72740.1 // LOC_Os07g48030.1 // LOC_Os02g34810.1 // LOC_Os03g13210.1 // LOC_Os12g08920.1…
GO:0020037	F	heme binding	86	979	734	30241	1e-22	6e-20	// LOC_Os02g14180.1 // LOC_Os02g47470.2 // LOC_Os03g12500.1 // LOC_Os01g11270.1 // LOC_Os10g34480.1 // LOC_Os02g09220.1 // LOC_Os10g39160.1 // LOC_Os03g25370.1 // LOC_Os02g42740.1 // LOC_Os01g72760.1 // LOC_Os06g35480.1 // LOC_Os02g09250.1 // LOC_Os12g05440.1 // LOC_Os07g28160.1 // LOC_Os05g41990.1 // LOC_Os01g72740.1 // LOC_Os07g48030.1 // LOC_Os02g34810.1 // LOC_Os03g13210.1 // LOC_Os12g08920.1…
GO:0005506	F	iron ion binding	90	979	867	30241	1.6e-20	3.7e-18	// LOC_Os12g05440.1 // LOC_Os02g14180.1 // LOC_Os02g47470.2 // LOC_Os03g12500.1 // LOC_Os01g11270.1 // LOC_Os10g34480.1 // LOC_Os02g09220.1 // LOC_Os10g39160.1 // LOC_Os03g25370.1 // LOC_Os02g42740.1 // LOC_Os01g72760.1 // LOC_Os06g35480.1 // LOC_Os02g09250.1 // LOC_Os03g52860.1 // LOC_Os07g28160.1 // LOC_Os05g41990.1 // LOC_Os01g72740.1 // LOC_Os07g48030.1 // LOC_Os02g34810.1 // LOC_Os03g13210.1…
GO:0016684	F	oxidoreductase activity, acting on peroxide as acceptor	45	979	232	30241	1.2e-19	1.7e-17	// LOC_Os03g36560.1 // LOC_Os01g18950.1 // LOC_Os03g25340.1 // LOC_Os02g14180.1 // LOC_Os12g08920.1 // LOC_Os07g01400.1 // LOC_Os01g73170.1 // LOC_Os05g04410.1 // LOC_Os03g22020.1 // LOC_Os03g22010.1 // LOC_Os03g25300.1 // LOC_Os01g19020.1 // LOC_Os03g02939.1 // LOC_Os10g39170.1 // LOC_Os07g34710.1 // LOC_Os05g06970.1 // LOC_Os04g59190.1 // LOC_Os05g04500.1 // LOC_Os04g59260.1 // LOC_Os01g18970.1…
GO:0004601	F	peroxidase activity	45	979	232	30241	1.2e-19	1.7e-17	// LOC_Os03g36560.1 // LOC_Os01g18950.1 // LOC_Os03g25340.1 // LOC_Os02g14180.1 // LOC_Os12g08920.1 // LOC_Os07g01400.1 // LOC_Os01g73170.1 // LOC_Os05g04410.1 // LOC_Os03g22020.1 // LOC_Os03g22010.1 // LOC_Os03g25300.1 // LOC_Os01g19020.1 // LOC_Os03g02939.1 // LOC_Os10g39170.1 // LOC_Os07g34710.1 // LOC_Os05g06970.1 // LOC_Os04g59190.1 // LOC_Os05g04500.1 // LOC_Os04g59260.1 // LOC_Os01g18970.1…
GO:0016209	F	antioxidant activity	45	979	258	30241	4.5e-18	5.2e-16	// LOC_Os03g36560.1 // LOC_Os01g18950.1 // LOC_Os03g25340.1 // LOC_Os02g14180.1 // LOC_Os12g08920.1 // LOC_Os07g01400.1 // LOC_Os01g73170.1 // LOC_Os05g04410.1 // LOC_Os03g22020.1 // LOC_Os03g22010.1 // LOC_Os03g25300.1 // LOC_Os01g19020.1 // LOC_Os03g02939.1 // LOC_Os10g39170.1 // LOC_Os07g34710.1 // LOC_Os05g06970.1 // LOC_Os04g59190.1 // LOC_Os05g04500.1 // LOC_Os04g59260.1 // LOC_Os01g18970.1…
GO:0016798	F	hydrolase activity, acting on glycosyl bonds	69	979	658	30241	3.7e-16	3.6e-14	// LOC_Os03g48235.1 // LOC_Os04g41680.1 // LOC_Os06g24990.1 // LOC_Os12g36810.1 // LOC_Os03g14210.1 // LOC_Os05g15510.1 // LOC_Os08g38170.3 // LOC_Os05g37130.1 // LOC_Os11g36940.1 // LOC_Os07g35480.2 // LOC_Os07g35480.1 // LOC_Os11g47580.1 // LOC_Os03g15020.1 // LOC_Os06g40890.1 // LOC_Os08g13980.1 // LOC_Os10g39840.1 // LOC_Os05g37130.2 // LOC_Os09g36280.1 // LOC_Os10g37660.1 // LOC_Os04g53950.1…
GO:0004553	F	hydrolase activity, hydrolyzing O-glycosyl compounds	65	979	607	30241	1.1e-15	9.3e-14	// LOC_Os01g71400.1 // LOC_Os06g24990.1 // LOC_Os12g36810.1 // LOC_Os03g14210.1 // LOC_Os05g15510.1 // LOC_Os05g37130.2 // LOC_Os05g37130.1 // LOC_Os11g36940.1 // LOC_Os07g35480.2 // LOC_Os07g35480.1 // LOC_Os11g47580.1 // LOC_Os03g15020.1 // LOC_Os06g40890.1 // LOC_Os08g13980.1 // LOC_Os10g39840.1 // LOC_Os09g36280.1 // LOC_Os10g37660.1 // LOC_Os04g53950.1 // LOC_Os05g20020.1 // LOC_Os04g30770.1…
GO:0016491	F	oxidoreductase activity	149	979	2405	30241	9.2e-14	6.9e-12	// LOC_Os12g05440.1 // LOC_Os03g57220.1 // LOC_Os02g14180.1 // LOC_Os02g47470.2 // LOC_Os05g38420.1 // LOC_Os12g12580.1 // LOC_Os03g12500.1 // LOC_Os12g15920.1 // LOC_Os04g15690.1 // LOC_Os09g19930.1 // LOC_Os02g30850.1 // LOC_Os10g34480.1 // LOC_Os02g09220.1 // LOC_Os10g39160.1 // LOC_Os01g45760.1 // LOC_Os03g25370.1 // LOC_Os03g25320.1 // LOC_Os01g72760.1 // LOC_Os06g35480.1 // LOC_Os01g55220.1…
GO:0004497	F	monooxygenase activity	43	979	476	30241	9.3e-09	6.4e-07	// LOC_Os04g14690.1 // LOC_Os06g33720.1 // LOC_Os01g52790.1 // LOC_Os02g30110.1 // LOC_Os01g08810.1 // LOC_Os03g55250.1 // LOC_Os01g11300.1 // LOC_Os02g47470.2 // LOC_Os10g36848.1 // LOC_Os03g12500.1 // LOC_Os02g29960.1 // LOC_Os01g11270.1 // LOC_Os02g26810.1 // LOC_Os08g01490.1 // LOC_Os05g43910.1 // LOC_Os03g21400.1 // LOC_Os10g34480.1 // LOC_Os02g09220.1 // LOC_Os01g43760.1 // LOC_Os01g43750.1…
GO:0030528	F	transcription regulator activity	81	979	1405	30241	1.1e-06	6.6e-05	// LOC_Os06g44010.1 // LOC_Os05g49010.1 // LOC_Os10g42490.1 // LOC_Os02g12790.1 // LOC_Os01g45570.1 // LOC_Os09g28200.1 // LOC_Os12g16240.1 // LOC_Os03g56050.1 // LOC_Os03g21970.1 // LOC_Os03g10210.1 // LOC_Os06g18960.1 // LOC_Os02g40070.1 // LOC_Os06g43220.1 // LOC_Os04g48070.1 // LOC_Os06g08340.1 // LOC_Os01g57890.1 // LOC_Os01g53260.1 // LOC_Os03g51690.1 // LOC_Os11g05640.1 // LOC_Os06g36680.1…
GO:0005507	F	copper ion binding	19	979	147	30241	1.3e-06	7.2e-05	// LOC_Os01g62600.1 // LOC_Os03g18640.1 // LOC_Os11g01730.1 // LOC_Os03g50140.1 // LOC_Os06g11490.1 // LOC_Os12g15920.1 // LOC_Os08g37670.1 // LOC_Os04g53710.1 // LOC_Os04g46130.1 // LOC_Os03g16610.1 // LOC_Os12g01730.1 // LOC_Os09g29390.1 // LOC_Os11g42220.1 // LOC_Os01g61160.1 // LOC_Os05g38410.1 // LOC_Os05g38420.1 // LOC_Os02g43660.1 // LOC_Os01g63190.1 // LOC_Os08g37660.1
GO:0043565	F	sequence-specific DNA binding	45	979	636	30241	2.7e-06	0.00014	// LOC_Os06g44010.1 // LOC_Os06g45640.1 // LOC_Os02g12790.1 // LOC_Os09g28200.1 // LOC_Os03g10210.1 // LOC_Os04g48070.1 // LOC_Os01g57890.1 // LOC_Os01g53260.1 // LOC_Os03g51690.1 // LOC_Os10g39030.1 // LOC_Os06g36680.1 // LOC_Os07g03770.1 // LOC_Os03g14669.2 // LOC_Os01g74140.1 // LOC_Os12g41860.1 // LOC_Os01g45570.1 // LOC_Os01g52680.1 // LOC_Os02g43560.1 // LOC_Os01g54210.1 // LOC_Os06g11330.1…
GO:0008415	F	acyltransferase activity	23	979	230	30241	5.7e-06	0.00026	// LOC_Os02g37800.1 // LOC_Os01g19390.1 // LOC_Os02g37654.1 // LOC_Os02g37770.1 // LOC_Os11g32650.1 // LOC_Os07g02540.1 // LOC_Os11g45400.1 // LOC_Os06g44100.1 // LOC_Os03g55530.1 // LOC_Os04g01354.1 // LOC_Os01g44069.1 // LOC_Os03g06705.1 // LOC_Os02g37760.1 // LOC_Os10g08026.1 // LOC_Os04g02640.1 // LOC_Os03g52010.1 // LOC_Os04g35430.1 // LOC_Os07g34260.1 // LOC_Os06g15170.1 // LOC_Os02g02340.1…
GO:0016747	F	transferase activity, transferring acyl groups other than amino-acyl groups	23	979	230	30241	5.7e-06	0.00026	// LOC_Os02g37800.1 // LOC_Os01g19390.1 // LOC_Os02g37654.1 // LOC_Os02g37770.1 // LOC_Os11g32650.1 // LOC_Os07g02540.1 // LOC_Os11g45400.1 // LOC_Os06g44100.1 // LOC_Os03g55530.1 // LOC_Os04g01354.1 // LOC_Os01g44069.1 // LOC_Os03g06705.1 // LOC_Os02g37760.1 // LOC_Os10g08026.1 // LOC_Os04g02640.1 // LOC_Os03g52010.1 // LOC_Os04g35430.1 // LOC_Os07g34260.1 // LOC_Os06g15170.1 // LOC_Os02g02340.1…
GO:0016746	F	transferase activity, transferring acyl groups	23	979	259	30241	3.3e-05	0.0013	// LOC_Os02g37800.1 // LOC_Os01g19390.1 // LOC_Os02g37654.1 // LOC_Os02g37770.1 // LOC_Os11g32650.1 // LOC_Os07g02540.1 // LOC_Os11g45400.1 // LOC_Os06g44100.1 // LOC_Os03g55530.1 // LOC_Os04g01354.1 // LOC_Os01g44069.1 // LOC_Os03g06705.1 // LOC_Os02g37760.1 // LOC_Os10g08026.1 // LOC_Os04g02640.1 // LOC_Os03g52010.1 // LOC_Os04g35430.1 // LOC_Os07g34260.1 // LOC_Os06g15170.1 // LOC_Os02g02340.1…
GO:0003700	F	transcription factor activity	54	979	908	30241	3.1e-05	0.0013	// LOC_Os06g44010.1 // LOC_Os05g49010.1 // LOC_Os02g12790.1 // LOC_Os01g45570.1 // LOC_Os09g28200.1 // LOC_Os03g56050.1 // LOC_Os03g10210.1 // LOC_Os06g43220.1 // LOC_Os04g48070.1 // LOC_Os01g57890.1 // LOC_Os01g53260.1 // LOC_Os03g51690.1 // LOC_Os10g39030.1 // LOC_Os06g36680.1 // LOC_Os07g03770.1 // LOC_Os01g74140.1 // LOC_Os01g52680.1 // LOC_Os02g42585.1 // LOC_Os01g10370.1 // LOC_Os11g05640.1…
GO:0016762	F	xyloglucan:xyloglucosyl transferase activity	8	979	34	30241	4.2e-05	0.0015	// LOC_Os04g53950.2 // LOC_Os10g39840.1 // LOC_Os04g51520.1 // LOC_Os11g33270.1 // LOC_Os08g13980.1 // LOC_Os09g23220.1 // LOC_Os03g01800.1 // LOC_Os10g42670.1
GO:0004607	F	phosphatidylcholine-sterol O-acyltransferase activity	7	979	24	30241	4e-05	0.0015	// LOC_Os02g37800.1 // LOC_Os10g08026.1 // LOC_Os03g52010.1 // LOC_Os02g37780.1 // LOC_Os02g37770.1 // LOC_Os02g37654.1 // LOC_Os02g37760.1
GO:0016758	F	transferase activity, transferring hexosyl groups	38	979	585	30241	8.7e-05	0.003	// LOC_Os09g30130.1 // LOC_Os10g40640.1 // LOC_Os01g41430.1 // LOC_Os02g30780.1 // LOC_Os03g08600.1 // LOC_Os04g47770.1 // LOC_Os04g53950.2 // LOC_Os06g16000.1 // LOC_Os02g36830.1 // LOC_Os06g10930.1 // LOC_Os08g13980.1 // LOC_Os03g20120.1 // LOC_Os06g18670.1 // LOC_Os04g51520.1 // LOC_Os07g30620.1 // LOC_Os01g43270.1 // LOC_Os07g05420.1 // LOC_Os07g30610.1 // LOC_Os01g56570.1 // LOC_Os09g34214.1…
GO:0008374	F	O-acyltransferase activity	7	979	31	30241	0.00016	0.0051	// LOC_Os02g37800.1 // LOC_Os10g08026.1 // LOC_Os03g52010.1 // LOC_Os02g37780.1 // LOC_Os02g37770.1 // LOC_Os02g37654.1 // LOC_Os02g37760.1
GO:0016757	F	transferase activity, transferring glycosyl groups	39	979	643	30241	0.00026	0.0082	// LOC_Os09g30130.1 // LOC_Os10g40640.1 // LOC_Os01g41430.1 // LOC_Os02g30780.1 // LOC_Os03g08600.1 // LOC_Os04g47770.1 // LOC_Os04g53950.2 // LOC_Os06g16000.1 // LOC_Os02g36830.1 // LOC_Os06g10930.1 // LOC_Os08g13980.1 // LOC_Os03g20120.1 // LOC_Os06g18670.1 // LOC_Os04g51520.1 // LOC_Os07g30620.1 // LOC_Os01g43270.1 // LOC_Os07g05420.1 // LOC_Os07g30610.1 // LOC_Os01g56570.1 // LOC_Os09g34214.1…
GO:0004197	F	cysteine-type endopeptidase activity	11	979	93	30241	0.00043	0.013	// LOC_Os01g24600.1 // LOC_Os01g24550.1 // LOC_Os01g24560.1 // LOC_Os09g39060.1 // LOC_Os09g39160.1 // LOC_Os01g24570.1 // LOC_Os09g39120.1 // LOC_Os03g54130.1 // LOC_Os08g44270.1 // LOC_Os09g39110.1 // LOC_Os09g39070.1
GO:0045735	F	nutrient reservoir activity	10	979	90	30241	0.0012	0.034	// LOC_Os01g72290.1 // LOC_Os08g13440.1 // LOC_Os08g35760.1 // LOC_Os08g08970.1 // LOC_Os08g09060.1 // LOC_Os05g02520.1 // LOC_Os08g08980.1 // LOC_Os08g35750.1 // LOC_Os08g09010.1 // LOC_Os10g28120.1
GO:0004650	F	polygalacturonase activity	7	979	46	30241	0.0013	0.035	// LOC_Os01g44970.1 // LOC_Os05g20020.1 // LOC_Os01g22590.1 // LOC_Os01g66710.1 // LOC_Os12g36810.1 // LOC_Os01g19170.1 // LOC_Os06g40890.1
GO:0003777	F	microtubule motor activity	8	979	69	30241	0.0028	0.074	// LOC_Os12g39980.1 // LOC_Os01g33040.1 // LOC_Os01g42070.1 // LOC_Os03g39020.1 // LOC_Os02g56540.1 // LOC_Os12g42160.1 // LOC_Os05g38480.1 // LOC_Os03g02290.1
GO:0030145	F	manganese ion binding	8	979	70	30241	0.0031	0.078	// LOC_Os01g72290.1 // LOC_Os08g13440.1 // LOC_Os08g08970.1 // LOC_Os08g09060.1 // LOC_Os08g35760.1 // LOC_Os08g08980.1 // LOC_Os08g35750.1 // LOC_Os08g09010.1
GO:0008289	F	lipid binding	10	979	120	30241	0.008	0.19	// LOC_Os11g02369.1 // LOC_Os03g57990.1 // LOC_Os07g07860.1 // LOC_Os11g02400.2 // LOC_Os12g02330.2 // LOC_Os11g02400.1 // LOC_Os03g07100.1 // LOC_Os12g02310.1 // LOC_Os01g60740.1 // LOC_Os08g01710.1
GO:0003774	F	motor activity	8	979	85	30241	0.0089	0.21	// LOC_Os12g39980.1 // LOC_Os01g33040.1 // LOC_Os01g42070.1 // LOC_Os03g39020.1 // LOC_Os02g56540.1 // LOC_Os12g42160.1 // LOC_Os05g38480.1 // LOC_Os03g02290.1
GO:0004180	F	carboxypeptidase activity	9	979	110	30241	0.013	0.25	// LOC_Os05g18604.1 // LOC_Os07g46350.1 // LOC_Os03g52070.1 // LOC_Os10g39150.1 // LOC_Os03g27480.1 // LOC_Os01g22954.1 // LOC_Os11g24180.1 // LOC_Os01g22980.1 // LOC_Os11g31980.1
GO:0070008	F	serine-type exopeptidase activity	9	979	110	30241	0.013	0.25	// LOC_Os05g18604.1 // LOC_Os07g46350.1 // LOC_Os03g52070.1 // LOC_Os10g39150.1 // LOC_Os03g27480.1 // LOC_Os01g22954.1 // LOC_Os11g24180.1 // LOC_Os01g22980.1 // LOC_Os11g31980.1
GO:0003993	F	acid phosphatase activity	6	979	56	30241	0.013	0.25	// LOC_Os05g10210.1 // LOC_Os05g09724.1 // LOC_Os05g10370.1 // LOC_Os03g21480.1 // LOC_Os01g09540.1 // LOC_Os05g09704.1
GO:0003824	F	catalytic activity	553	979	15960	30241	0.012	0.25	// LOC_Os01g54230.1 // LOC_Os06g30130.1 // LOC_Os03g57220.1 // LOC_Os02g14180.1 // LOC_Os01g41430.1 // LOC_Os03g19250.1 // LOC_Os01g36550.1 // LOC_Os05g38420.1 // LOC_Os02g47310.1 // LOC_Os11g22350.1 // LOC_Os06g16000.1 // LOC_Os05g51740.1 // LOC_Os04g15690.1 // LOC_Os11g08569.1 // LOC_Os08g02440.1 // LOC_Os10g34480.1 // LOC_Os10g39150.1 // LOC_Os10g39160.1 // LOC_Os01g45760.1 // LOC_Os01g43270.1…
GO:0004185	F	serine-type carboxypeptidase activity	9	979	110	30241	0.013	0.25	// LOC_Os05g18604.1 // LOC_Os07g46350.1 // LOC_Os03g52070.1 // LOC_Os10g39150.1 // LOC_Os03g27480.1 // LOC_Os01g22954.1 // LOC_Os11g24180.1 // LOC_Os01g22980.1 // LOC_Os11g31980.1
GO:0009055	F	electron carrier activity	18	979	298	30241	0.011	0.25	// LOC_Os01g24600.1 // LOC_Os06g46910.1 // LOC_Os01g24550.1 // LOC_Os03g50140.1 // LOC_Os06g11490.1 // LOC_Os04g46130.1 // LOC_Os08g37670.1 // LOC_Os07g18154.1 // LOC_Os09g29390.1 // LOC_Os12g35330.1 // LOC_Os02g30850.1 // LOC_Os01g13480.1 // LOC_Os11g43520.1 // LOC_Os04g33680.1 // LOC_Os04g53710.1 // LOC_Os02g43660.1 // LOC_Os06g46436.1 // LOC_Os08g37660.1
GO:0004194	F	pepsin A activity	10	979	140	30241	0.02	0.38	// LOC_Os06g03120.1 // LOC_Os06g03080.1 // LOC_Os07g46480.1 // LOC_Os10g39260.1 // LOC_Os01g42320.1 // LOC_Os08g36540.1 // LOC_Os06g40818.1 // LOC_Os10g39300.1 // LOC_Os04g37550.1 // LOC_Os10g39270.1
GO:0016831	F	carboxy-lyase activity	8	979	101	30241	0.022	0.4	// LOC_Os01g54230.1 // LOC_Os01g02050.1 // LOC_Os08g36320.2 // LOC_Os08g04560.1 // LOC_Os12g19470.2 // LOC_Os12g19470.1 // LOC_Os10g13700.2 // LOC_Os08g36320.1
GO:0043169	F	cation binding	248	979	6862	30241	0.03	0.51	// LOC_Os12g38010.1 // LOC_Os12g02230.1 // LOC_Os12g05440.1 // LOC_Os01g03230.1 // LOC_Os02g14180.1 // LOC_Os03g22020.1 // LOC_Os01g64670.1 // LOC_Os05g43910.1 // LOC_Os07g35480.2 // LOC_Os07g35480.1 // LOC_Os09g27510.1 // LOC_Os02g47470.2 // LOC_Os05g38420.1 // LOC_Os12g12580.1 // LOC_Os03g17870.1 // LOC_Os03g12500.1 // LOC_Os02g07650.1 // LOC_Os12g15920.1 // LOC_Os05g36900.1 // LOC_Os12g38290.1…
GO:0030599	F	pectinesterase activity	8	979	107	30241	0.029	0.51	// LOC_Os04g46740.2 // LOC_Os10g10620.1 // LOC_Os08g34910.1 // LOC_Os01g20980.1 // LOC_Os02g46360.1 // LOC_Os04g46740.1 // LOC_Os06g09340.1 // LOC_Os08g34900.1
GO:0043167	F	ion binding	248	979	6866	30241	0.03	0.51	// LOC_Os12g38010.1 // LOC_Os12g02230.1 // LOC_Os12g05440.1 // LOC_Os01g03230.1 // LOC_Os02g14180.1 // LOC_Os03g22020.1 // LOC_Os01g64670.1 // LOC_Os05g43910.1 // LOC_Os07g35480.2 // LOC_Os07g35480.1 // LOC_Os09g27510.1 // LOC_Os02g47470.2 // LOC_Os05g38420.1 // LOC_Os12g12580.1 // LOC_Os03g17870.1 // LOC_Os03g12500.1 // LOC_Os02g07650.1 // LOC_Os12g15920.1 // LOC_Os05g36900.1 // LOC_Os12g38290.1…
GO:0015035	F	protein disulfide oxidoreductase activity	6	979	69	30241	0.03	0.51	// LOC_Os04g15690.1 // LOC_Os01g13480.1 // LOC_Os12g35330.1 // LOC_Os02g30850.1 // LOC_Os04g33680.1 // LOC_Os11g43520.1
GO:0004091	F	carboxylesterase activity	12	979	196	30241	0.032	0.52	// LOC_Os04g46740.1 // LOC_Os08g34900.1 // LOC_Os08g34910.1 // LOC_Os11g19340.1 // LOC_Os01g20980.1 // LOC_Os10g10620.1 // LOC_Os06g09340.1 // LOC_Os02g46360.1 // LOC_Os04g56240.1 // LOC_Os04g46740.2 // LOC_Os11g34440.1 // LOC_Os05g49840.1
GO:0050660	F	FAD binding	12	979	197	30241	0.033	0.52	// LOC_Os01g45760.1 // LOC_Os04g29090.1 // LOC_Os04g14690.1 // LOC_Os09g19930.1 // LOC_Os06g33720.1 // LOC_Os07g18154.1 // LOC_Os10g33540.1 // LOC_Os08g36480.1 // LOC_Os01g49360.1 // LOC_Os10g33520.1 // LOC_Os09g37650.1 // LOC_Os02g03200.1
GO:0016830	F	carbon-carbon lyase activity	10	979	156	30241	0.037	0.57	// LOC_Os01g54230.1 // LOC_Os01g02050.1 // LOC_Os08g36320.2 // LOC_Os06g40640.1 // LOC_Os06g40640.2 // LOC_Os08g04560.1 // LOC_Os12g19470.2 // LOC_Os12g19470.1 // LOC_Os10g13700.2 // LOC_Os08g36320.1
GO:0015036	F	disulfide oxidoreductase activity	6	979	73	30241	0.038	0.57	// LOC_Os04g15690.1 // LOC_Os01g13480.1 // LOC_Os12g35330.1 // LOC_Os02g30850.1 // LOC_Os04g33680.1 // LOC_Os11g43520.1
GO:0008238	F	exopeptidase activity	9	979	142	30241	0.049	0.73	// LOC_Os05g18604.1 // LOC_Os07g46350.1 // LOC_Os03g52070.1 // LOC_Os10g39150.1 // LOC_Os03g27480.1 // LOC_Os01g22954.1 // LOC_Os11g24180.1 // LOC_Os01g22980.1 // LOC_Os11g31980.1
GO:0008080	F	N-acetyltransferase activity	5	979	59	30241	0.05	0.73	// LOC_Os03g55530.1 // LOC_Os06g44100.1 // LOC_Os04g35430.1 // LOC_Os07g02540.1 // LOC_Os01g66890.1
GO:0050662	F	coenzyme binding	24	979	510	30241	0.051	0.73	// LOC_Os09g25150.1 // LOC_Os04g14690.1 // LOC_Os03g57220.1 // LOC_Os06g33720.1 // LOC_Os01g45760.1 // LOC_Os09g04050.1 // LOC_Os09g31498.1 // LOC_Os09g19930.1 // LOC_Os08g08500.1 // LOC_Os10g33540.1 // LOC_Os02g56700.1 // LOC_Os09g37650.1 // LOC_Os06g44180.1 // LOC_Os02g01150.2 // LOC_Os02g01150.1 // LOC_Os07g40690.1 // LOC_Os08g36480.1 // LOC_Os06g46920.1 // LOC_Os07g18154.1 // LOC_Os09g35800.1…
GO:0016410	F	N-acyltransferase activity	5	979	60	30241	0.053	0.74	// LOC_Os03g55530.1 // LOC_Os06g44100.1 // LOC_Os04g35430.1 // LOC_Os07g02540.1 // LOC_Os01g66890.1
GO:0004857	F	enzyme inhibitor activity	11	979	193	30241	0.058	0.79	// LOC_Os12g36240.1 // LOC_Os08g34910.1 // LOC_Os01g20980.1 // LOC_Os10g10620.1 // LOC_Os06g09340.1 // LOC_Os02g46360.1 // LOC_Os01g03360.1 // LOC_Os01g03330.1 // LOC_Os01g42860.1 // LOC_Os01g03340.1 // LOC_Os08g34900.1
GO:0016705	F	oxidoreductase activity, acting on paired donors, with incorporation or reduction of molecular oxygen	6	979	86	30241	0.069	0.93	// LOC_Os01g45760.1 // LOC_Os04g14690.1 // LOC_Os06g33720.1 // LOC_Os12g01370.1 // LOC_Os08g09950.1 // LOC_Os09g37650.1
GO:0004867	F	serine-type endopeptidase inhibitor activity	5	979	74	30241	0.1	1	// LOC_Os01g03360.1 // LOC_Os01g42860.1 // LOC_Os01g03340.1 // LOC_Os01g03330.1 // LOC_Os12g36240.1
GO:0008236	F	serine-type peptidase activity	11	979	211	30241	0.092	1	// LOC_Os05g18604.1 // LOC_Os07g46350.1 // LOC_Os03g52070.1 // LOC_Os01g22980.1 // LOC_Os10g39150.1 // LOC_Os03g27480.1 // LOC_Os01g22954.1 // LOC_Os11g24180.1 // LOC_Os03g28980.1 // LOC_Os04g47360.1 // LOC_Os11g31980.1
GO:0060089	F	molecular transducer activity	7	979	305	30241	0.86	1	// LOC_Os05g08530.1 // LOC_Os02g42060.1 // LOC_Os08g06060.1 // LOC_Os04g36070.1 // LOC_Os06g44410.1 // LOC_Os03g10880.1 // LOC_Os12g41910.1
GO:0000166	F	nucleotide binding	121	979	5097	30241	1	1	// LOC_Os06g30130.1 // LOC_Os12g39980.1 // LOC_Os09g19930.1 // LOC_Os06g17490.1 // LOC_Os06g22060.1 // LOC_Os06g38990.1 // LOC_Os01g36550.1 // LOC_Os11g22350.1 // LOC_Os05g51740.1 // LOC_Os03g57220.1 // LOC_Os10g10540.1 // LOC_Os11g12340.1 // LOC_Os08g02440.1 // LOC_Os04g30160.1 // LOC_Os08g43120.1 // LOC_Os12g26940.1 // LOC_Os01g45760.1 // LOC_Os05g05820.1 // LOC_Os05g31910.1 // LOC_Os11g41650.1…
GO:0070001	F	aspartic-type peptidase activity	12	979	2165	30241	1	1	// LOC_Os09g29710.1 // LOC_Os06g03080.1 // LOC_Os03g44290.1 // LOC_Os07g46480.1 // LOC_Os10g39260.1 // LOC_Os06g03120.1 // LOC_Os08g36540.1 // LOC_Os01g42320.1 // LOC_Os06g40818.1 // LOC_Os10g39300.1 // LOC_Os04g37550.1 // LOC_Os10g39270.1
GO:0016740	F	transferase activity	148	979	6832	30241	1	1	// LOC_Os06g30130.1 // LOC_Os06g17490.1 // LOC_Os01g41430.1 // LOC_Os06g22060.1 // LOC_Os04g47770.1 // LOC_Os06g38990.1 // LOC_Os01g36550.1 // LOC_Os02g47310.1 // LOC_Os06g16000.1 // LOC_Os05g51740.1 // LOC_Os11g32650.1 // LOC_Os08g13980.1 // LOC_Os07g02540.1 // LOC_Os10g10540.1 // LOC_Os08g02440.1 // LOC_Os04g57400.1 // LOC_Os04g51520.1 // LOC_Os01g56570.1 // LOC_Os02g37760.1 // LOC_Os12g26940.1…
GO:0016741	F	transferase activity, transferring one-carbon groups	6	979	285	30241	0.9	1	// LOC_Os05g47540.1 // LOC_Os11g20090.1 // LOC_Os04g40530.1 // LOC_Os04g51400.1 // LOC_Os04g11970.1 // LOC_Os02g47310.1
GO:0004713	F	protein tyrosine kinase activity	60	979	1857	30241	0.53	1	// LOC_Os08g10310.1 // LOC_Os01g66020.1 // LOC_Os06g30130.1 // LOC_Os01g66860.2 // LOC_Os10g38920.1 // LOC_Os06g17490.1 // LOC_Os04g35890.1 // LOC_Os12g44090.1 // LOC_Os05g44930.1 // LOC_Os05g14220.1 // LOC_Os05g44990.1 // LOC_Os02g56380.1 // LOC_Os10g21090.1 // LOC_Os06g38990.1 // LOC_Os01g36550.1 // LOC_Os10g38960.1 // LOC_Os01g09580.2 // LOC_Os01g09580.1 // LOC_Os04g30010.1 // LOC_Os04g30240.1…
GO:0046873	F	metal ion transmembrane transporter activity	6	979	138	30241	0.3	1	// LOC_Os06g45940.1 // LOC_Os03g37840.1 // LOC_Os03g37830.1 // LOC_Os06g37010.1 // LOC_Os07g01214.1 // LOC_Os04g46940.1
GO:0004674	F	protein serine/threonine kinase activity	60	979	1851	30241	0.52	1	// LOC_Os08g10310.1 // LOC_Os01g66020.1 // LOC_Os06g30130.1 // LOC_Os01g66860.2 // LOC_Os10g38920.1 // LOC_Os06g17490.1 // LOC_Os04g35890.1 // LOC_Os12g44090.1 // LOC_Os05g44930.1 // LOC_Os05g14220.1 // LOC_Os05g44990.1 // LOC_Os02g56380.1 // LOC_Os10g21090.1 // LOC_Os06g38990.1 // LOC_Os01g36550.1 // LOC_Os10g38960.1 // LOC_Os01g09580.2 // LOC_Os01g09580.1 // LOC_Os04g30010.1 // LOC_Os04g30240.1…
GO:0017171	F	serine hydrolase activity	11	979	211	30241	0.092	1	// LOC_Os05g18604.1 // LOC_Os07g46350.1 // LOC_Os03g52070.1 // LOC_Os01g22980.1 // LOC_Os10g39150.1 // LOC_Os03g27480.1 // LOC_Os01g22954.1 // LOC_Os11g24180.1 // LOC_Os03g28980.1 // LOC_Os04g47360.1 // LOC_Os11g31980.1
GO:0016614	F	oxidoreductase activity, acting on CH-OH group of donors	7	979	161	30241	0.28	1	// LOC_Os02g01150.1 // LOC_Os01g69030.1 // LOC_Os02g01150.2 // LOC_Os09g19930.1 // LOC_Os10g33540.1 // LOC_Os02g58790.1 // LOC_Os10g33520.1
GO:0070279	F	vitamin B6 binding	5	979	199	30241	0.77	1	// LOC_Os02g20360.1 // LOC_Os06g36850.1 // LOC_Os08g36320.2 // LOC_Os08g36320.1 // LOC_Os08g04560.1
GO:0042578	F	phosphoric ester hydrolase activity	12	979	345	30241	0.44	1	// LOC_Os03g57950.1 // LOC_Os05g11570.1 // LOC_Os05g10210.1 // LOC_Os05g09724.1 // LOC_Os03g06460.1 // LOC_Os06g40180.1 // LOC_Os05g10370.1 // LOC_Os01g64660.2 // LOC_Os01g64660.1 // LOC_Os03g21480.1 // LOC_Os01g09540.1 // LOC_Os05g09704.1
GO:0016818	F	hydrolase activity, acting on acid anhydrides, in phosphorus-containing anhydrides	30	979	1010	30241	0.71	1	// LOC_Os12g02230.1 // LOC_Os12g39980.1 // LOC_Os01g42070.1 // LOC_Os03g39020.1 // LOC_Os01g64670.1 // LOC_Os12g22284.1 // LOC_Os11g22350.1 // LOC_Os05g02890.1 // LOC_Os01g33040.1 // LOC_Os04g25900.1 // LOC_Os08g30770.1 // LOC_Os05g38480.1 // LOC_Os05g36260.1 // LOC_Os08g43120.1 // LOC_Os04g46940.1 // LOC_Os02g56540.1 // LOC_Os05g31910.1 // LOC_Os02g33420.1 // LOC_Os04g54930.1 // LOC_Os01g42900.1…
GO:0016298	F	lipase activity	5	979	109	30241	0.29	1	// LOC_Os04g56240.1 // LOC_Os11g34440.1 // LOC_Os05g49840.1 // LOC_Os11g19340.1 // LOC_Os06g40180.1
GO:0016817	F	hydrolase activity, acting on acid anhydrides	31	979	1029	30241	0.68	1	// LOC_Os12g02230.1 // LOC_Os12g39980.1 // LOC_Os01g42070.1 // LOC_Os03g39020.1 // LOC_Os01g64670.1 // LOC_Os12g22284.1 // LOC_Os11g22350.1 // LOC_Os05g02890.1 // LOC_Os01g33040.1 // LOC_Os04g25900.1 // LOC_Os08g30770.1 // LOC_Os05g38480.1 // LOC_Os05g36260.1 // LOC_Os08g43120.1 // LOC_Os04g46940.1 // LOC_Os02g56540.1 // LOC_Os05g31910.1 // LOC_Os12g44300.1 // LOC_Os02g33420.1 // LOC_Os04g54930.1…
GO:0030170	F	pyridoxal phosphate binding	5	979	199	30241	0.77	1	// LOC_Os02g20360.1 // LOC_Os06g36850.1 // LOC_Os08g36320.2 // LOC_Os08g36320.1 // LOC_Os08g04560.1
GO:0016887	F	ATPase activity	13	979	516	30241	0.85	1	// LOC_Os08g43120.1 // LOC_Os01g42900.1 // LOC_Os05g02890.1 // LOC_Os09g03939.1 // LOC_Os05g31910.1 // LOC_Os01g50160.1 // LOC_Os12g22284.1 // LOC_Os03g17350.1 // LOC_Os01g61940.1 // LOC_Os04g54930.1 // LOC_Os08g30770.1 // LOC_Os11g22350.1 // LOC_Os04g46940.1
GO:0003677	F	DNA binding	117	979	5822	30241	1	1	// LOC_Os06g44010.1 // LOC_Os06g45640.1 // LOC_Os08g42400.2 // LOC_Os03g56050.1 // LOC_Os06g43220.1 // LOC_Os07g32170.1 // LOC_Os07g03770.1 // LOC_Os05g36900.1 // LOC_Os01g50720.1 // LOC_Os03g20080.1 // LOC_Os08g15020.1 // LOC_Os11g35390.1 // LOC_Os01g52680.1 // LOC_Os06g44750.1 // LOC_Os12g41060.1 // LOC_Os09g25070.1 // LOC_Os04g38740.1 // LOC_Os10g08026.1 // LOC_Os06g08340.1 // LOC_Os09g29820.1…
GO:0008168	F	methyltransferase activity	5	979	277	30241	0.94	1	// LOC_Os05g47540.1 // LOC_Os04g40530.1 // LOC_Os02g47310.1 // LOC_Os11g20090.1 // LOC_Os04g11970.1
GO:0005529	F	sugar binding	10	979	299	30241	0.5	1	// LOC_Os06g10990.1 // LOC_Os12g03650.1 // LOC_Os06g17490.1 // LOC_Os03g15020.1 // LOC_Os02g19530.1 // LOC_Os01g66610.1 // LOC_Os03g58900.1 // LOC_Os06g28194.1 // LOC_Os10g38960.1 // LOC_Os01g72810.1
GO:0017076	F	purine nucleotide binding	117	979	4450	30241	0.99	1	// LOC_Os06g30130.1 // LOC_Os12g39980.1 // LOC_Os09g19930.1 // LOC_Os06g17490.1 // LOC_Os06g22060.1 // LOC_Os06g38990.1 // LOC_Os01g36550.1 // LOC_Os11g22350.1 // LOC_Os05g51740.1 // LOC_Os05g02890.1 // LOC_Os10g10540.1 // LOC_Os11g12340.1 // LOC_Os08g02440.1 // LOC_Os04g30160.1 // LOC_Os08g43120.1 // LOC_Os12g26940.1 // LOC_Os01g45760.1 // LOC_Os05g05820.1 // LOC_Os05g31910.1 // LOC_Os11g41650.1…
GO:0016787	F	hydrolase activity	205	979	6726	30241	0.84	1	// LOC_Os12g02230.1 // LOC_Os05g10210.1 // LOC_Os12g39980.1 // LOC_Os06g05630.1 // LOC_Os01g44970.1 // LOC_Os01g64670.1 // LOC_Os01g22980.1 // LOC_Os01g24570.1 // LOC_Os04g46740.1 // LOC_Os04g46740.2 // LOC_Os07g35480.2 // LOC_Os07g35480.1 // LOC_Os06g13180.1 // LOC_Os11g22350.1 // LOC_Os10g37660.1 // LOC_Os08g13980.1 // LOC_Os05g02890.1 // LOC_Os01g33040.1 // LOC_Os10g38860.1 // LOC_Os05g20020.1…
GO:0016788	F	hydrolase activity, acting on ester bonds	56	979	2093	30241	0.94	1	// LOC_Os05g10210.1 // LOC_Os05g09724.1 // LOC_Os06g05630.1 // LOC_Os09g36680.1 // LOC_Os04g56240.1 // LOC_Os06g14630.1 // LOC_Os04g46740.2 // LOC_Os07g47210.1 // LOC_Os11g31940.1 // LOC_Os05g49840.1 // LOC_Os03g57950.1 // LOC_Os08g41560.1 // LOC_Os05g11570.1 // LOC_Os08g34900.1 // LOC_Os02g57110.1 // LOC_Os11g19340.1 // LOC_Os02g40440.1 // LOC_Os06g12410.1 // LOC_Os01g37050.1 // LOC_Os03g06460.1…
GO:0022892	F	substrate-specific transporter activity	22	979	915	30241	0.94	1	// LOC_Os06g45940.1 // LOC_Os01g52130.1 // LOC_Os03g25869.1 // LOC_Os10g31040.2 // LOC_Os10g31040.1 // LOC_Os03g37840.1 // LOC_Os07g10590.1 // LOC_Os02g41710.1 // LOC_Os04g46940.1 // LOC_Os05g49260.1 // LOC_Os02g40730.1 // LOC_Os12g44300.1 // LOC_Os03g55100.1 // LOC_Os03g37830.1 // LOC_Os07g01214.1 // LOC_Os03g10090.1 // LOC_Os04g10750.1 // LOC_Os04g38220.1 // LOC_Os06g37010.1 // LOC_Os01g71710.1…
GO:0016773	F	phosphotransferase activity, alcohol group as acceptor	66	979	2302	30241	0.86	1	// LOC_Os08g10310.1 // LOC_Os01g66020.1 // LOC_Os06g30130.1 // LOC_Os01g66860.2 // LOC_Os10g38920.1 // LOC_Os06g17490.1 // LOC_Os04g35890.1 // LOC_Os12g44090.1 // LOC_Os05g44930.1 // LOC_Os06g22060.1 // LOC_Os05g44990.1 // LOC_Os02g56380.1 // LOC_Os10g21090.1 // LOC_Os06g38990.1 // LOC_Os01g36550.1 // LOC_Os10g38960.1 // LOC_Os01g09580.2 // LOC_Os01g09580.1 // LOC_Os04g30010.1 // LOC_Os04g30240.1…
GO:0016772	F	transferase activity, transferring phosphorus-containing groups	70	979	5367	30241	1	1	// LOC_Os08g10310.1 // LOC_Os01g66020.1 // LOC_Os06g30130.1 // LOC_Os01g66860.2 // LOC_Os10g38920.1 // LOC_Os06g17490.1 // LOC_Os04g35890.1 // LOC_Os12g18530.1 // LOC_Os12g44090.1 // LOC_Os05g44930.1 // LOC_Os06g22060.1 // LOC_Os05g44990.1 // LOC_Os02g56380.1 // LOC_Os10g21090.1 // LOC_Os02g02970.1 // LOC_Os06g38990.1 // LOC_Os01g36550.1 // LOC_Os10g38960.1 // LOC_Os01g09580.2 // LOC_Os01g09580.1…
GO:0015075	F	ion transmembrane transporter activity	17	979	691	30241	0.9	1	// LOC_Os06g45940.1 // LOC_Os01g03914.2 // LOC_Os02g40730.1 // LOC_Os01g52130.1 // LOC_Os03g37840.1 // LOC_Os02g41710.1 // LOC_Os07g10590.1 // LOC_Os04g38220.1 // LOC_Os12g44300.1 // LOC_Os03g55100.1 // LOC_Os04g10750.1 // LOC_Os03g37830.1 // LOC_Os06g37010.1 // LOC_Os07g01214.1 // LOC_Os03g10090.1 // LOC_Os04g46940.1 // LOC_Os05g49260.1
GO:0016874	F	ligase activity	5	979	455	30241	1	1	// LOC_Os09g27510.1 // LOC_Os12g22600.1 // LOC_Os11g06900.1 // LOC_Os01g16650.1 // LOC_Os10g38920.1
GO:0032555	F	purine ribonucleotide binding	105	979	4250	30241	1	1	// LOC_Os06g30130.1 // LOC_Os12g39980.1 // LOC_Os06g17490.1 // LOC_Os06g22060.1 // LOC_Os06g38990.1 // LOC_Os01g36550.1 // LOC_Os11g22350.1 // LOC_Os05g51740.1 // LOC_Os05g02890.1 // LOC_Os10g10540.1 // LOC_Os11g12340.1 // LOC_Os08g02440.1 // LOC_Os04g30160.1 // LOC_Os08g43120.1 // LOC_Os12g26940.1 // LOC_Os05g05820.1 // LOC_Os05g31910.1 // LOC_Os11g41650.1 // LOC_Os11g01620.1 // LOC_Os01g42900.1…
GO:0046983	F	protein dimerization activity	17	979	536	30241	0.57	1	// LOC_Os04g56850.1 // LOC_Os06g15480.1 // LOC_Os09g29820.1 // LOC_Os03g43400.1 // LOC_Os11g20090.1 // LOC_Os02g56120.1 // LOC_Os01g09450.1 // LOC_Os12g40900.1 // LOC_Os11g05640.1 // LOC_Os03g53150.1 // LOC_Os12g05680.1 // LOC_Os04g11970.1 // LOC_Os01g01560.1 // LOC_Os11g05480.1 // LOC_Os12g44300.1 // LOC_Os08g01780.1 // LOC_Os05g09480.1
GO:0032553	F	ribonucleotide binding	105	979	4250	30241	1	1	// LOC_Os06g30130.1 // LOC_Os12g39980.1 // LOC_Os06g17490.1 // LOC_Os06g22060.1 // LOC_Os06g38990.1 // LOC_Os01g36550.1 // LOC_Os11g22350.1 // LOC_Os05g51740.1 // LOC_Os05g02890.1 // LOC_Os10g10540.1 // LOC_Os11g12340.1 // LOC_Os08g02440.1 // LOC_Os04g30160.1 // LOC_Os08g43120.1 // LOC_Os12g26940.1 // LOC_Os05g05820.1 // LOC_Os05g31910.1 // LOC_Os11g41650.1 // LOC_Os11g01620.1 // LOC_Os01g42900.1…
GO:0008270	F	zinc ion binding	50	979	4459	30241	1	1	// LOC_Os01g03230.1 // LOC_Os02g37790.1 // LOC_Os04g51400.1 // LOC_Os09g37820.1 // LOC_Os07g47140.1 // LOC_Os08g32750.1 // LOC_Os03g11680.1 // LOC_Os10g07229.1 // LOC_Os05g10690.1 // LOC_Os06g13180.1 // LOC_Os01g54210.1 // LOC_Os12g12580.1 // LOC_Os02g07650.1 // LOC_Os08g41560.1 // LOC_Os08g36110.1 // LOC_Os05g36900.1 // LOC_Os03g20080.1 // LOC_Os02g40950.1 // LOC_Os01g19800.1 // LOC_Os01g19050.1…
GO:0016791	F	phosphatase activity	9	979	285	30241	0.58	1	// LOC_Os03g57950.1 // LOC_Os05g11570.1 // LOC_Os05g10210.1 // LOC_Os05g09724.1 // LOC_Os05g10370.1 // LOC_Os03g06460.1 // LOC_Os03g21480.1 // LOC_Os01g09540.1 // LOC_Os05g09704.1
GO:0008234	F	cysteine-type peptidase activity	12	979	491	30241	0.87	1	// LOC_Os01g24600.1 // LOC_Os11g06570.1 // LOC_Os01g24550.1 // LOC_Os01g24560.1 // LOC_Os09g39060.1 // LOC_Os09g39160.1 // LOC_Os01g24570.1 // LOC_Os09g39120.1 // LOC_Os03g54130.1 // LOC_Os08g44270.1 // LOC_Os09g39110.1 // LOC_Os09g39070.1
GO:0008194	F	UDP-glycosyltransferase activity	6	979	140	30241	0.31	1	// LOC_Os01g69030.1 // LOC_Os09g30130.1 // LOC_Os07g49370.1 // LOC_Os12g36890.1 // LOC_Os09g25490.1 // LOC_Os01g56570.1
GO:0016829	F	lyase activity	19	979	448	30241	0.15	1	// LOC_Os02g20360.1 // LOC_Os02g36140.2 // LOC_Os01g54230.1 // LOC_Os01g02050.1 // LOC_Os08g36320.2 // LOC_Os11g08569.1 // LOC_Os10g39710.1 // LOC_Os11g04660.1 // LOC_Os04g27190.1 // LOC_Os08g32750.1 // LOC_Os06g40640.1 // LOC_Os06g40640.2 // LOC_Os02g17780.1 // LOC_Os10g13700.2 // LOC_Os08g04560.1 // LOC_Os12g19470.2 // LOC_Os12g19470.1 // LOC_Os12g04424.1 // LOC_Os08g36320.1
GO:0000287	F	magnesium ion binding	7	979	177	30241	0.36	1	// LOC_Os04g27190.1 // LOC_Os12g02230.1 // LOC_Os03g39020.1 // LOC_Os01g64670.1 // LOC_Os02g36140.2 // LOC_Os02g17780.1 // LOC_Os05g36260.1
GO:0016301	F	kinase activity	68	979	2354	30241	0.85	1	// LOC_Os08g10310.1 // LOC_Os01g66020.1 // LOC_Os06g30130.1 // LOC_Os01g66860.2 // LOC_Os10g38920.1 // LOC_Os06g17490.1 // LOC_Os04g35890.1 // LOC_Os12g44090.1 // LOC_Os05g44930.1 // LOC_Os06g22060.1 // LOC_Os05g44990.1 // LOC_Os02g56380.1 // LOC_Os10g21090.1 // LOC_Os06g38990.1 // LOC_Os01g36550.1 // LOC_Os10g38960.1 // LOC_Os01g09580.2 // LOC_Os01g09580.1 // LOC_Os04g30010.1 // LOC_Os04g30240.1…
GO:0005509	F	calcium ion binding	14	979	492	30241	0.72	1	// LOC_Os04g30240.1 // LOC_Os11g46900.1 // LOC_Os12g41110.1 // LOC_Os06g44100.1 // LOC_Os06g40180.1 // LOC_Os10g07556.1 // LOC_Os10g25010.1 // LOC_Os01g26280.1 // LOC_Os11g34440.1 // LOC_Os04g30160.1 // LOC_Os06g14324.1 // LOC_Os09g38850.1 // LOC_Os04g29580.1 // LOC_Os04g30010.1
GO:0015297	F	antiporter activity	5	979	127	30241	0.4	1	// LOC_Os12g44300.1 // LOC_Os10g20450.1 // LOC_Os06g29844.1 // LOC_Os03g11734.1 // LOC_Os09g29284.1
GO:0015291	F	secondary active transmembrane transporter activity	11	979	286	30241	0.33	1	// LOC_Os10g20450.1 // LOC_Os01g52130.1 // LOC_Os04g10750.1 // LOC_Os07g10590.1 // LOC_Os04g38220.1 // LOC_Os12g44300.1 // LOC_Os06g29844.1 // LOC_Os05g49260.1 // LOC_Os03g10090.1 // LOC_Os03g11734.1 // LOC_Os09g29284.1
GO:0016667	F	oxidoreductase activity, acting on sulfur group of donors	6	979	96	30241	0.1	1	// LOC_Os04g15690.1 // LOC_Os01g13480.1 // LOC_Os12g35330.1 // LOC_Os02g30850.1 // LOC_Os04g33680.1 // LOC_Os11g43520.1
GO:0008233	F	peptidase activity	37	979	3084	30241	1	1	// LOC_Os01g24600.1 // LOC_Os09g29710.1 // LOC_Os07g14610.1 // LOC_Os09g39160.1 // LOC_Os01g24570.1 // LOC_Os03g28980.1 // LOC_Os11g24180.1 // LOC_Os06g13180.1 // LOC_Os01g24560.1 // LOC_Os10g39260.1 // LOC_Os08g36540.1 // LOC_Os03g44290.1 // LOC_Os03g52070.1 // LOC_Os03g54130.1 // LOC_Os10g39150.1 // LOC_Os01g22954.1 // LOC_Os04g37550.1 // LOC_Os04g47360.1 // LOC_Os11g31980.1 // LOC_Os06g03080.1…
GO:0022890	F	inorganic cation transmembrane transporter activity	7	979	286	30241	0.82	1	// LOC_Os06g45940.1 // LOC_Os02g40730.1 // LOC_Os03g37840.1 // LOC_Os03g37830.1 // LOC_Os06g37010.1 // LOC_Os07g01214.1 // LOC_Os04g46940.1
GO:0005215	F	transporter activity	56	979	1558	30241	0.23	1	// LOC_Os06g45940.1 // LOC_Os10g05780.1 // LOC_Os01g52130.1 // LOC_Os03g01290.1 // LOC_Os06g37010.1 // LOC_Os04g56240.1 // LOC_Os07g01214.1 // LOC_Os02g41860.2 // LOC_Os10g31040.2 // LOC_Os10g31040.1 // LOC_Os11g04030.1 // LOC_Os04g59480.1 // LOC_Os09g29284.1 // LOC_Os10g20450.1 // LOC_Os03g37840.1 // LOC_Os03g10090.1 // LOC_Os01g65110.1 // LOC_Os07g10590.1 // LOC_Os03g25869.1 // LOC_Os07g33954.1…
GO:0030246	F	carbohydrate binding	13	979	383	30241	0.47	1	// LOC_Os04g41680.1 // LOC_Os06g10990.1 // LOC_Os04g41640.1 // LOC_Os06g17490.1 // LOC_Os03g15020.1 // LOC_Os02g19530.1 // LOC_Os02g39330.1 // LOC_Os12g03650.1 // LOC_Os03g58900.1 // LOC_Os06g28194.1 // LOC_Os10g38960.1 // LOC_Os01g72810.1 // LOC_Os01g66610.1
GO:0004866	F	endopeptidase inhibitor activity	5	979	101	30241	0.24	1	// LOC_Os01g03360.1 // LOC_Os01g42860.1 // LOC_Os01g03340.1 // LOC_Os01g03330.1 // LOC_Os12g36240.1
GO:0046872	F	metal ion binding	214	979	6558	30241	0.46	1	// LOC_Os12g38010.1 // LOC_Os12g02230.1 // LOC_Os12g05440.1 // LOC_Os01g03230.1 // LOC_Os02g14180.1 // LOC_Os03g22020.1 // LOC_Os01g64670.1 // LOC_Os05g43910.1 // LOC_Os09g27510.1 // LOC_Os02g47470.2 // LOC_Os05g38420.1 // LOC_Os12g12580.1 // LOC_Os03g17870.1 // LOC_Os03g12500.1 // LOC_Os02g07650.1 // LOC_Os12g15920.1 // LOC_Os05g36900.1 // LOC_Os12g38290.1 // LOC_Os05g04470.1 // LOC_Os03g20080.1…
GO:0030554	F	adenyl nucleotide binding	117	979	4184	30241	0.96	1	// LOC_Os06g30130.1 // LOC_Os12g39980.1 // LOC_Os09g19930.1 // LOC_Os06g17490.1 // LOC_Os06g22060.1 // LOC_Os06g38990.1 // LOC_Os01g36550.1 // LOC_Os11g22350.1 // LOC_Os05g51740.1 // LOC_Os05g02890.1 // LOC_Os10g10540.1 // LOC_Os11g12340.1 // LOC_Os08g02440.1 // LOC_Os04g30160.1 // LOC_Os08g43120.1 // LOC_Os12g26940.1 // LOC_Os01g45760.1 // LOC_Os05g05820.1 // LOC_Os05g31910.1 // LOC_Os11g41650.1…
GO:0016407	F	acetyltransferase activity	5	979	71	30241	0.09	1	// LOC_Os03g55530.1 // LOC_Os06g44100.1 // LOC_Os04g35430.1 // LOC_Os07g02540.1 // LOC_Os01g66890.1
GO:0004190	F	aspartic-type endopeptidase activity	12	979	2165	30241	1	1	// LOC_Os09g29710.1 // LOC_Os06g03080.1 // LOC_Os03g44290.1 // LOC_Os07g46480.1 // LOC_Os10g39260.1 // LOC_Os06g03120.1 // LOC_Os08g36540.1 // LOC_Os01g42320.1 // LOC_Os06g40818.1 // LOC_Os10g39300.1 // LOC_Os04g37550.1 // LOC_Os10g39270.1
GO:0005515	F	protein binding	84	979	3642	30241	1	1	// LOC_Os08g10310.1 // LOC_Os07g48680.1 // LOC_Os08g02440.1 // LOC_Os01g41120.1 // LOC_Os01g43440.1 // LOC_Os05g09480.1 // LOC_Os01g52750.1 // LOC_Os03g36160.1 // LOC_Os01g58290.1 // LOC_Os07g38130.1 // LOC_Os04g51400.1 // LOC_Os02g56120.1 // LOC_Os01g09450.1 // LOC_Os02g10520.1 // LOC_Os05g44990.1 // LOC_Os03g63200.1 // LOC_Os06g38990.1 // LOC_Os05g44930.1 // LOC_Os11g18940.1 // LOC_Os05g51740.1…
GO:0005488	F	binding	570	979	20560	30241	1	1	// LOC_Os06g30130.1 // LOC_Os03g57220.1 // LOC_Os02g14180.1 // LOC_Os01g36550.1 // LOC_Os05g38420.1 // LOC_Os12g12580.1 // LOC_Os11g22350.1 // LOC_Os02g07650.1 // LOC_Os07g03770.1 // LOC_Os08g02440.1 // LOC_Os08g15020.1 // LOC_Os10g34480.1 // LOC_Os10g39160.1 // LOC_Os05g03884.1 // LOC_Os01g45760.1 // LOC_Os03g57990.1 // LOC_Os09g29820.1 // LOC_Os05g31910.1 // LOC_Os03g64340.1 // LOC_Os04g56170.1…
GO:0004175	F	endopeptidase activity	26	979	2406	30241	1	1	// LOC_Os01g24600.1 // LOC_Os09g29710.1 // LOC_Os09g39160.1 // LOC_Os01g24570.1 // LOC_Os06g13180.1 // LOC_Os01g24560.1 // LOC_Os10g39260.1 // LOC_Os08g36540.1 // LOC_Os03g44290.1 // LOC_Os03g54130.1 // LOC_Os04g37550.1 // LOC_Os04g47360.1 // LOC_Os06g03080.1 // LOC_Os01g42320.1 // LOC_Os07g46480.1 // LOC_Os09g39120.1 // LOC_Os08g44270.1 // LOC_Os03g28980.1 // LOC_Os06g03120.1 // LOC_Os01g24550.1…
GO:0003676	F	nucleic acid binding	135	979	9396	30241	1	1	// LOC_Os06g44010.1 // LOC_Os06g45640.1 // LOC_Os01g03230.1 // LOC_Os08g42400.2 // LOC_Os03g56050.1 // LOC_Os06g43220.1 // LOC_Os07g32170.1 // LOC_Os07g03770.1 // LOC_Os05g36900.1 // LOC_Os01g50720.1 // LOC_Os03g20080.1 // LOC_Os08g15020.1 // LOC_Os11g35390.1 // LOC_Os01g52680.1 // LOC_Os06g44750.1 // LOC_Os12g41060.1 // LOC_Os09g25070.1 // LOC_Os04g38740.1 // LOC_Os10g08026.1 // LOC_Os06g08340.1…
GO:0019842	F	vitamin binding	7	979	292	30241	0.83	1	// LOC_Os02g20360.1 // LOC_Os06g36850.1 // LOC_Os08g36320.1 // LOC_Os08g36320.2 // LOC_Os08g04560.1 // LOC_Os03g38540.1 // LOC_Os03g38540.2
GO:0004871	F	signal transducer activity	7	979	305	30241	0.86	1	// LOC_Os05g08530.1 // LOC_Os02g42060.1 // LOC_Os08g06060.1 // LOC_Os04g36070.1 // LOC_Os06g44410.1 // LOC_Os03g10880.1 // LOC_Os12g41910.1
GO:0001883	F	purine nucleoside binding	117	979	4184	30241	0.96	1	// LOC_Os06g30130.1 // LOC_Os12g39980.1 // LOC_Os09g19930.1 // LOC_Os06g17490.1 // LOC_Os06g22060.1 // LOC_Os06g38990.1 // LOC_Os01g36550.1 // LOC_Os11g22350.1 // LOC_Os05g51740.1 // LOC_Os05g02890.1 // LOC_Os10g10540.1 // LOC_Os11g12340.1 // LOC_Os08g02440.1 // LOC_Os04g30160.1 // LOC_Os08g43120.1 // LOC_Os12g26940.1 // LOC_Os01g45760.1 // LOC_Os05g05820.1 // LOC_Os05g31910.1 // LOC_Os11g41650.1…
GO:0001882	F	nucleoside binding	117	979	4184	30241	0.96	1	// LOC_Os06g30130.1 // LOC_Os12g39980.1 // LOC_Os09g19930.1 // LOC_Os06g17490.1 // LOC_Os06g22060.1 // LOC_Os06g38990.1 // LOC_Os01g36550.1 // LOC_Os11g22350.1 // LOC_Os05g51740.1 // LOC_Os05g02890.1 // LOC_Os10g10540.1 // LOC_Os11g12340.1 // LOC_Os08g02440.1 // LOC_Os04g30160.1 // LOC_Os08g43120.1 // LOC_Os12g26940.1 // LOC_Os01g45760.1 // LOC_Os05g05820.1 // LOC_Os05g31910.1 // LOC_Os11g41650.1…
GO:0016462	F	pyrophosphatase activity	30	979	1008	30241	0.7	1	// LOC_Os12g02230.1 // LOC_Os12g39980.1 // LOC_Os01g42070.1 // LOC_Os03g39020.1 // LOC_Os01g64670.1 // LOC_Os12g22284.1 // LOC_Os11g22350.1 // LOC_Os05g02890.1 // LOC_Os01g33040.1 // LOC_Os04g25900.1 // LOC_Os08g30770.1 // LOC_Os05g38480.1 // LOC_Os05g36260.1 // LOC_Os08g43120.1 // LOC_Os04g46940.1 // LOC_Os02g56540.1 // LOC_Os05g31910.1 // LOC_Os02g33420.1 // LOC_Os04g54930.1 // LOC_Os01g42900.1…
GO:0022857	F	transmembrane transporter activity	27	979	949	30241	0.77	1	// LOC_Os06g45940.1 // LOC_Os01g52130.1 // LOC_Os03g25869.1 // LOC_Os04g54930.1 // LOC_Os10g31040.2 // LOC_Os10g31040.1 // LOC_Os09g29284.1 // LOC_Os10g20450.1 // LOC_Os03g37840.1 // LOC_Os07g10590.1 // LOC_Os04g10750.1 // LOC_Os04g46940.1 // LOC_Os05g49260.1 // LOC_Os02g40730.1 // LOC_Os12g44300.1 // LOC_Os06g37010.1 // LOC_Os03g37830.1 // LOC_Os07g01214.1 // LOC_Os03g10090.1 // LOC_Os03g55100.1…
GO:0005524	F	ATP binding	105	979	3986	30241	0.99	1	// LOC_Os06g30130.1 // LOC_Os12g39980.1 // LOC_Os06g17490.1 // LOC_Os06g22060.1 // LOC_Os06g38990.1 // LOC_Os01g36550.1 // LOC_Os11g22350.1 // LOC_Os05g51740.1 // LOC_Os05g02890.1 // LOC_Os10g10540.1 // LOC_Os11g12340.1 // LOC_Os08g02440.1 // LOC_Os04g30160.1 // LOC_Os08g43120.1 // LOC_Os12g26940.1 // LOC_Os05g05820.1 // LOC_Os05g31910.1 // LOC_Os11g41650.1 // LOC_Os11g01620.1 // LOC_Os01g42900.1…
GO:0004672	F	protein kinase activity	63	979	2095	30241	0.74	1	// LOC_Os08g10310.1 // LOC_Os01g66020.1 // LOC_Os06g30130.1 // LOC_Os01g66860.2 // LOC_Os10g38920.1 // LOC_Os06g17490.1 // LOC_Os04g35890.1 // LOC_Os12g44090.1 // LOC_Os05g44930.1 // LOC_Os05g14220.1 // LOC_Os05g44990.1 // LOC_Os02g56380.1 // LOC_Os10g21090.1 // LOC_Os06g38990.1 // LOC_Os01g36550.1 // LOC_Os10g38960.1 // LOC_Os01g09580.2 // LOC_Os01g09580.1 // LOC_Os04g30010.1 // LOC_Os04g30240.1…
GO:0032559	F	adenyl ribonucleotide binding	105	979	3990	30241	0.99	1	// LOC_Os06g30130.1 // LOC_Os12g39980.1 // LOC_Os06g17490.1 // LOC_Os06g22060.1 // LOC_Os06g38990.1 // LOC_Os01g36550.1 // LOC_Os11g22350.1 // LOC_Os05g51740.1 // LOC_Os05g02890.1 // LOC_Os10g10540.1 // LOC_Os11g12340.1 // LOC_Os08g02440.1 // LOC_Os04g30160.1 // LOC_Os08g43120.1 // LOC_Os12g26940.1 // LOC_Os05g05820.1 // LOC_Os05g31910.1 // LOC_Os11g41650.1 // LOC_Os11g01620.1 // LOC_Os01g42900.1…
GO:0022804	F	active transmembrane transporter activity	16	979	572	30241	0.75	1	// LOC_Os10g20450.1 // LOC_Os01g52130.1 // LOC_Os03g25869.1 // LOC_Os04g10750.1 // LOC_Os07g10590.1 // LOC_Os04g38220.1 // LOC_Os12g44300.1 // LOC_Os01g71710.1 // LOC_Os01g50160.1 // LOC_Os04g46940.1 // LOC_Os06g29844.1 // LOC_Os04g54930.1 // LOC_Os05g49260.1 // LOC_Os03g10090.1 // LOC_Os03g11734.1 // LOC_Os09g29284.1
GO:0008324	F	cation transmembrane transporter activity	13	979	522	30241	0.86	1	// LOC_Os06g45940.1 // LOC_Os02g40730.1 // LOC_Os03g37840.1 // LOC_Os01g03914.2 // LOC_Os07g10590.1 // LOC_Os04g38220.1 // LOC_Os12g44300.1 // LOC_Os03g37830.1 // LOC_Os06g37010.1 // LOC_Os07g01214.1 // LOC_Os03g10090.1 // LOC_Os04g46940.1 // LOC_Os05g49260.1
GO:0030234	F	enzyme regulator activity	11	979	311	30241	0.43	1	// LOC_Os12g36240.1 // LOC_Os08g34910.1 // LOC_Os01g20980.1 // LOC_Os10g10620.1 // LOC_Os06g09340.1 // LOC_Os02g46360.1 // LOC_Os01g03360.1 // LOC_Os01g03330.1 // LOC_Os01g42860.1 // LOC_Os01g03340.1 // LOC_Os08g34900.1
GO:0017111	F	nucleoside-triphosphatase activity	27	979	962	30241	0.8	1	// LOC_Os12g39980.1 // LOC_Os01g42070.1 // LOC_Os03g39020.1 // LOC_Os12g22284.1 // LOC_Os11g22350.1 // LOC_Os05g02890.1 // LOC_Os01g33040.1 // LOC_Os04g25900.1 // LOC_Os08g30770.1 // LOC_Os05g38480.1 // LOC_Os08g43120.1 // LOC_Os04g46940.1 // LOC_Os02g56540.1 // LOC_Os05g31910.1 // LOC_Os02g33420.1 // LOC_Os04g54930.1 // LOC_Os01g42900.1 // LOC_Os01g50160.1 // LOC_Os03g51230.1 // LOC_Os09g03939.1…
GO:0030414	F	peptidase inhibitor activity	5	979	103	30241	0.25	1	// LOC_Os01g03360.1 // LOC_Os01g42860.1 // LOC_Os01g03340.1 // LOC_Os01g03330.1 // LOC_Os12g36240.1
GO:0022891	F	substrate-specific transmembrane transporter activity	21	979	779	30241	0.83	1	// LOC_Os07g01214.1 // LOC_Os01g03914.2 // LOC_Os03g55100.1 // LOC_Os02g40730.1 // LOC_Os01g52130.1 // LOC_Os03g37840.1 // LOC_Os02g41710.1 // LOC_Os03g37830.1 // LOC_Os07g10590.1 // LOC_Os04g38220.1 // LOC_Os12g44300.1 // LOC_Os03g25869.1 // LOC_Os06g45940.1 // LOC_Os04g10750.1 // LOC_Os06g37010.1 // LOC_Os10g31040.2 // LOC_Os10g31040.1 // LOC_Os01g71710.1 // LOC_Os03g10090.1 // LOC_Os04g46940.1…
GO:0070011	F	peptidase activity, acting on L-amino acid peptides	37	979	3071	30241	1	1	// LOC_Os01g24600.1 // LOC_Os09g29710.1 // LOC_Os07g14610.1 // LOC_Os09g39160.1 // LOC_Os01g24570.1 // LOC_Os03g28980.1 // LOC_Os11g24180.1 // LOC_Os06g13180.1 // LOC_Os01g24560.1 // LOC_Os10g39260.1 // LOC_Os08g36540.1 // LOC_Os03g44290.1 // LOC_Os03g52070.1 // LOC_Os03g54130.1 // LOC_Os10g39150.1 // LOC_Os01g22954.1 // LOC_Os04g37550.1 // LOC_Os04g47360.1 // LOC_Os11g31980.1 // LOC_Os06g03080.1…
GO:0048037	F	cofactor binding	29	979	745	30241	0.19	1	// LOC_Os06g36850.1 // LOC_Os09g25150.1 // LOC_Os04g14690.1 // LOC_Os03g57220.1 // LOC_Os06g33720.1 // LOC_Os01g45760.1 // LOC_Os09g04050.1 // LOC_Os08g36320.1 // LOC_Os09g31498.1 // LOC_Os09g19930.1 // LOC_Os08g08500.1 // LOC_Os10g33540.1 // LOC_Os08g04560.1 // LOC_Os02g56700.1 // LOC_Os09g37650.1 // LOC_Os06g44180.1 // LOC_Os02g01150.2 // LOC_Os02g01150.1 // LOC_Os08g36320.2 // LOC_Os07g40690.1…
GO:0046914	F	transition metal ion binding	169	979	5688	30241	0.9	1	// LOC_Os12g05440.1 // LOC_Os01g03230.1 // LOC_Os02g14180.1 // LOC_Os10g34884.1 // LOC_Os02g47470.2 // LOC_Os05g38420.1 // LOC_Os12g12580.1 // LOC_Os03g12500.1 // LOC_Os02g07650.1 // LOC_Os12g15920.1 // LOC_Os05g36900.1 // LOC_Os05g04470.1 // LOC_Os03g20080.1 // LOC_Os01g19800.1 // LOC_Os10g34480.1 // LOC_Os02g09220.1 // LOC_Os10g39160.1 // LOC_Os04g28580.1 // LOC_Os03g25370.1 // LOC_Os02g42740.1…
GO:0005576	C	extracellular region	41	979	250	30241	9.2e-16	1.1e-13	// LOC_Os01g72290.1 // LOC_Os08g13440.1 // LOC_Os04g46630.1 // LOC_Os08g08970.1 // LOC_Os08g09060.1 // LOC_Os07g03279.1 // LOC_Os10g40720.1 // LOC_Os06g13180.1 // LOC_Os03g60720.1 // LOC_Os04g46650.1 // LOC_Os08g13980.1 // LOC_Os10g39840.1 // LOC_Os06g41700.1 // LOC_Os05g19570.1 // LOC_Os03g44290.1 // LOC_Os03g01800.1 // LOC_Os01g03360.1 // LOC_Os04g15840.1 // LOC_Os04g51520.1 // LOC_Os02g44108.1…
GO:0048046	C	apoplast	16	979	80	30241	4.9e-08	2.8e-06	// LOC_Os01g72290.1 // LOC_Os08g13440.1 // LOC_Os04g53950.2 // LOC_Os10g39840.1 // LOC_Os08g08970.1 // LOC_Os08g09010.1 // LOC_Os08g09060.1 // LOC_Os08g35760.1 // LOC_Os04g51520.1 // LOC_Os11g33270.1 // LOC_Os08g35750.1 // LOC_Os08g08980.1 // LOC_Os08g13980.1 // LOC_Os09g23220.1 // LOC_Os03g01800.1 // LOC_Os10g42670.1
GO:0005618	C	cell wall	14	979	96	30241	9.1e-06	0.00035	// LOC_Os09g23220.1 // LOC_Os04g53950.2 // LOC_Os10g39840.1 // LOC_Os01g20980.1 // LOC_Os06g09340.1 // LOC_Os04g46740.1 // LOC_Os04g46740.2 // LOC_Os04g51520.1 // LOC_Os11g33270.1 // LOC_Os08g34910.1 // LOC_Os08g13980.1 // LOC_Os08g34900.1 // LOC_Os03g01800.1 // LOC_Os10g42670.1
GO:0030312	C	external encapsulating structure	15	979	117	30241	1.8e-05	0.00051	// LOC_Os04g15690.1 // LOC_Os09g23220.1 // LOC_Os04g53950.2 // LOC_Os10g39840.1 // LOC_Os01g20980.1 // LOC_Os06g09340.1 // LOC_Os04g46740.1 // LOC_Os04g46740.2 // LOC_Os04g51520.1 // LOC_Os11g33270.1 // LOC_Os08g34910.1 // LOC_Os08g13980.1 // LOC_Os08g34900.1 // LOC_Os03g01800.1 // LOC_Os10g42670.1
GO:0005875	C	microtubule associated complex	8	979	69	30241	0.0028	0.065	// LOC_Os12g39980.1 // LOC_Os01g33040.1 // LOC_Os01g42070.1 // LOC_Os03g39020.1 // LOC_Os02g56540.1 // LOC_Os12g42160.1 // LOC_Os05g38480.1 // LOC_Os03g02290.1
GO:0015630	C	microtubule cytoskeleton	8	979	116	30241	0.042	0.8	// LOC_Os12g39980.1 // LOC_Os01g33040.1 // LOC_Os01g42070.1 // LOC_Os03g39020.1 // LOC_Os02g56540.1 // LOC_Os12g42160.1 // LOC_Os05g38480.1 // LOC_Os03g02290.1
GO:0044446	C	intracellular organelle part	14	979	1710	30241	1	1	// LOC_Os12g19470.1 // LOC_Os04g14690.1 // LOC_Os01g33040.1 // LOC_Os01g42070.1 // LOC_Os03g39020.1 // LOC_Os02g56540.1 // LOC_Os12g42160.1 // LOC_Os07g05360.1 // LOC_Os02g10800.1 // LOC_Os05g38480.1 // LOC_Os12g19470.2 // LOC_Os09g37650.1 // LOC_Os03g02290.1 // LOC_Os12g39980.1
GO:0044444	C	cytoplasmic part	12	979	1307	30241	1	1	// LOC_Os07g34620.1 // LOC_Os09g37650.1 // LOC_Os04g14690.1 // LOC_Os01g16400.1 // LOC_Os06g22060.1 // LOC_Os09g31019.1 // LOC_Os05g43310.1 // LOC_Os02g10800.1 // LOC_Os11g42989.1 // LOC_Os12g19470.2 // LOC_Os12g19470.1 // LOC_Os09g17810.1
GO:0043228	C	non-membrane-bounded organelle	12	979	1794	30241	1	1	// LOC_Os07g34620.1 // LOC_Os12g39980.1 // LOC_Os01g33040.1 // LOC_Os01g42070.1 // LOC_Os03g39020.1 // LOC_Os02g56540.1 // LOC_Os10g25010.1 // LOC_Os12g42160.1 // LOC_Os09g31019.1 // LOC_Os05g38480.1 // LOC_Os01g16400.1 // LOC_Os03g02290.1
GO:0016021	C	integral to membrane	37	979	1015	30241	0.26	1	// LOC_Os01g52130.1 // LOC_Os01g65380.1 // LOC_Os10g31040.2 // LOC_Os10g31040.1 // LOC_Os11g31940.1 // LOC_Os06g44970.1 // LOC_Os07g06800.1 // LOC_Os11g04030.1 // LOC_Os07g44180.1 // LOC_Os01g43460.1 // LOC_Os07g10590.1 // LOC_Os02g56510.1 // LOC_Os07g33954.1 // LOC_Os02g51110.1 // LOC_Os08g41720.1 // LOC_Os06g22960.1 // LOC_Os12g03860.1 // LOC_Os04g10750.1 // LOC_Os04g46940.1 // LOC_Os05g49260.1…
GO:0016020	C	membrane	101	979	2907	30241	0.25	1	// LOC_Os03g25869.1 // LOC_Os10g32110.1 // LOC_Os12g44110.2 // LOC_Os11g31940.1 // LOC_Os06g44970.1 // LOC_Os09g29284.1 // LOC_Os03g52650.1 // LOC_Os03g48810.1 // LOC_Os01g56570.1 // LOC_Os02g26650.3 // LOC_Os09g25490.1 // LOC_Os12g04000.1 // LOC_Os11g04190.1 // LOC_Os11g05390.1 // LOC_Os04g38220.1 // LOC_Os10g33170.1 // LOC_Os08g44750.1 // LOC_Os06g29844.1 // LOC_Os01g03914.2 // LOC_Os01g01360.1…
GO:0044422	C	organelle part	14	979	1710	30241	1	1	// LOC_Os12g19470.1 // LOC_Os04g14690.1 // LOC_Os01g33040.1 // LOC_Os01g42070.1 // LOC_Os03g39020.1 // LOC_Os02g56540.1 // LOC_Os12g42160.1 // LOC_Os07g05360.1 // LOC_Os02g10800.1 // LOC_Os05g38480.1 // LOC_Os12g19470.2 // LOC_Os09g37650.1 // LOC_Os03g02290.1 // LOC_Os12g39980.1
GO:0043234	C	protein complex	17	979	1124	30241	1	1	// LOC_Os12g39980.1 // LOC_Os01g33040.1 // LOC_Os12g42160.1 // LOC_Os03g39020.1 // LOC_Os02g56540.1 // LOC_Os01g42070.1 // LOC_Os12g44300.1 // LOC_Os06g22060.1 // LOC_Os07g05360.1 // LOC_Os05g43310.1 // LOC_Os05g38480.1 // LOC_Os12g19470.2 // LOC_Os11g42989.1 // LOC_Os03g15020.1 // LOC_Os12g19470.1 // LOC_Os03g02290.1 // LOC_Os09g17810.1
GO:0043231	C	intracellular membrane-bounded organelle	101	979	3438	30241	0.86	1	// LOC_Os03g56050.1 // LOC_Os03g21970.1 // LOC_Os06g43220.1 // LOC_Os07g32170.1 // LOC_Os07g03770.1 // LOC_Os06g51110.1 // LOC_Os01g52680.1 // LOC_Os06g44750.1 // LOC_Os12g41060.1 // LOC_Os09g25070.1 // LOC_Os01g59120.1 // LOC_Os06g08340.1 // LOC_Os09g29820.1 // LOC_Os02g43560.1 // LOC_Os03g03260.1 // LOC_Os04g56170.1 // LOC_Os12g05680.1 // LOC_Os06g01934.1 // LOC_Os01g70890.1 // LOC_Os02g40070.1…
GO:0043232	C	intracellular non-membrane-bounded organelle	12	979	1794	30241	1	1	// LOC_Os07g34620.1 // LOC_Os12g39980.1 // LOC_Os01g33040.1 // LOC_Os01g42070.1 // LOC_Os03g39020.1 // LOC_Os02g56540.1 // LOC_Os10g25010.1 // LOC_Os12g42160.1 // LOC_Os09g31019.1 // LOC_Os05g38480.1 // LOC_Os01g16400.1 // LOC_Os03g02290.1
GO:0044424	C	intracellular part	126	979	5186	30241	1	1	// LOC_Os12g02230.1 // LOC_Os12g39980.1 // LOC_Os01g64670.1 // LOC_Os03g56050.1 // LOC_Os03g21970.1 // LOC_Os06g22060.1 // LOC_Os06g43220.1 // LOC_Os07g32170.1 // LOC_Os07g03770.1 // LOC_Os01g33040.1 // LOC_Os06g51110.1 // LOC_Os01g52680.1 // LOC_Os06g44750.1 // LOC_Os05g36260.1 // LOC_Os09g25070.1 // LOC_Os01g59120.1 // LOC_Os06g08340.1 // LOC_Os09g29820.1 // LOC_Os02g43560.1 // LOC_Os03g03260.1…
GO:0043229	C	intracellular organelle	114	979	4284	30241	0.99	1	// LOC_Os12g39980.1 // LOC_Os03g56050.1 // LOC_Os03g21970.1 // LOC_Os06g43220.1 // LOC_Os07g32170.1 // LOC_Os07g03770.1 // LOC_Os01g33040.1 // LOC_Os06g51110.1 // LOC_Os01g52680.1 // LOC_Os06g44750.1 // LOC_Os12g41060.1 // LOC_Os09g25070.1 // LOC_Os01g59120.1 // LOC_Os06g08340.1 // LOC_Os09g29820.1 // LOC_Os02g43560.1 // LOC_Os03g03260.1 // LOC_Os09g31019.1 // LOC_Os12g05680.1 // LOC_Os06g01934.1…
GO:0005622	C	intracellular	144	979	6088	30241	1	1	// LOC_Os12g02230.1 // LOC_Os06g45640.1 // LOC_Os12g39980.1 // LOC_Os01g64670.1 // LOC_Os03g56050.1 // LOC_Os03g21970.1 // LOC_Os06g22060.1 // LOC_Os06g43220.1 // LOC_Os02g07650.1 // LOC_Os07g03770.1 // LOC_Os01g33040.1 // LOC_Os06g51110.1 // LOC_Os01g52680.1 // LOC_Os06g44750.1 // LOC_Os05g36260.1 // LOC_Os09g25070.1 // LOC_Os01g59120.1 // LOC_Os06g08340.1 // LOC_Os09g29820.1 // LOC_Os02g43560.1…
GO:0043227	C	membrane-bounded organelle	102	979	3457	30241	0.85	1	// LOC_Os03g56050.1 // LOC_Os03g21970.1 // LOC_Os06g43220.1 // LOC_Os07g32170.1 // LOC_Os07g03770.1 // LOC_Os06g51110.1 // LOC_Os01g52680.1 // LOC_Os06g44750.1 // LOC_Os12g41060.1 // LOC_Os09g25070.1 // LOC_Os01g59120.1 // LOC_Os06g08340.1 // LOC_Os09g29820.1 // LOC_Os02g43560.1 // LOC_Os03g03260.1 // LOC_Os04g56170.1 // LOC_Os12g05680.1 // LOC_Os06g01934.1 // LOC_Os01g70890.1 // LOC_Os02g40070.1…
GO:0005856	C	cytoskeleton	8	979	168	30241	0.19	1	// LOC_Os12g39980.1 // LOC_Os01g33040.1 // LOC_Os01g42070.1 // LOC_Os03g39020.1 // LOC_Os02g56540.1 // LOC_Os12g42160.1 // LOC_Os05g38480.1 // LOC_Os03g02290.1
GO:0044425	C	membrane part	41	979	1373	30241	0.72	1	// LOC_Os04g14690.1 // LOC_Os01g52130.1 // LOC_Os01g65380.1 // LOC_Os10g31040.2 // LOC_Os10g31040.1 // LOC_Os11g31940.1 // LOC_Os06g44970.1 // LOC_Os07g06800.1 // LOC_Os11g04030.1 // LOC_Os07g44180.1 // LOC_Os01g43460.1 // LOC_Os07g10590.1 // LOC_Os02g56510.1 // LOC_Os07g33954.1 // LOC_Os02g51110.1 // LOC_Os05g43310.1 // LOC_Os08g41720.1 // LOC_Os06g22960.1 // LOC_Os09g37650.1 // LOC_Os04g10750.1…
GO:0031224	C	intrinsic to membrane	39	979	1031	30241	0.19	1	// LOC_Os04g14690.1 // LOC_Os01g52130.1 // LOC_Os01g65380.1 // LOC_Os10g31040.2 // LOC_Os10g31040.1 // LOC_Os11g31940.1 // LOC_Os06g44970.1 // LOC_Os07g06800.1 // LOC_Os11g04030.1 // LOC_Os07g44180.1 // LOC_Os01g43460.1 // LOC_Os07g10590.1 // LOC_Os02g56510.1 // LOC_Os07g33954.1 // LOC_Os02g51110.1 // LOC_Os08g41720.1 // LOC_Os06g22960.1 // LOC_Os09g37650.1 // LOC_Os04g10750.1 // LOC_Os04g46940.1…
GO:0005737	C	cytoplasm	22	979	1735	30241	1	1	// LOC_Os12g02230.1 // LOC_Os04g14690.1 // LOC_Os10g38920.1 // LOC_Os03g39020.1 // LOC_Os01g64670.1 // LOC_Os06g22060.1 // LOC_Os07g06800.1 // LOC_Os11g42989.1 // LOC_Os05g43310.1 // LOC_Os05g36260.1 // LOC_Os09g37650.1 // LOC_Os01g69030.1 // LOC_Os09g31019.1 // LOC_Os09g27510.1 // LOC_Os09g17810.1 // LOC_Os07g34620.1 // LOC_Os01g16400.1 // LOC_Os12g22600.1 // LOC_Os02g10800.1 // LOC_Os12g19470.2…
GO:0032991	C	macromolecular complex	20	979	1871	30241	1	1	// LOC_Os07g34620.1 // LOC_Os01g16400.1 // LOC_Os12g39980.1 // LOC_Os01g33040.1 // LOC_Os12g42160.1 // LOC_Os03g39020.1 // LOC_Os02g56540.1 // LOC_Os01g42070.1 // LOC_Os12g44300.1 // LOC_Os06g22060.1 // LOC_Os09g31019.1 // LOC_Os07g05360.1 // LOC_Os05g43310.1 // LOC_Os05g38480.1 // LOC_Os12g19470.2 // LOC_Os11g42989.1 // LOC_Os03g15020.1 // LOC_Os12g19470.1 // LOC_Os03g02290.1 // LOC_Os09g17810.1
GO:0044464	C	cell part	253	979	8636	30241	0.97	1	// LOC_Os12g02230.1 // LOC_Os06g45640.1 // LOC_Os01g65110.1 // LOC_Os12g39980.1 // LOC_Os03g25869.1 // LOC_Os01g64670.1 // LOC_Os03g56050.1 // LOC_Os03g21970.1 // LOC_Os04g46740.1 // LOC_Os06g22060.1 // LOC_Os04g46740.2 // LOC_Os12g44110.2 // LOC_Os06g43220.1 // LOC_Os11g31940.1 // LOC_Os06g44970.1 // LOC_Os07g44180.1 // LOC_Os02g07650.1 // LOC_Os07g03770.1 // LOC_Os04g15690.1 // LOC_Os08g13980.1…
GO:0005634	C	nucleus	95	979	2990	30241	0.59	1	// LOC_Os03g56050.1 // LOC_Os03g21970.1 // LOC_Os06g43220.1 // LOC_Os07g32170.1 // LOC_Os07g03770.1 // LOC_Os06g51110.1 // LOC_Os01g52680.1 // LOC_Os06g44750.1 // LOC_Os12g41060.1 // LOC_Os09g25070.1 // LOC_Os01g59120.1 // LOC_Os06g08340.1 // LOC_Os09g29820.1 // LOC_Os02g43560.1 // LOC_Os03g03260.1 // LOC_Os04g56170.1 // LOC_Os12g05680.1 // LOC_Os06g01934.1 // LOC_Os01g70890.1 // LOC_Os02g40070.1…
GO:0005623	C	cell	253	979	8636	30241	0.97	1	// LOC_Os12g02230.1 // LOC_Os06g45640.1 // LOC_Os01g65110.1 // LOC_Os12g39980.1 // LOC_Os03g25869.1 // LOC_Os01g64670.1 // LOC_Os03g56050.1 // LOC_Os03g21970.1 // LOC_Os04g46740.1 // LOC_Os06g22060.1 // LOC_Os04g46740.2 // LOC_Os12g44110.2 // LOC_Os06g43220.1 // LOC_Os11g31940.1 // LOC_Os06g44970.1 // LOC_Os07g44180.1 // LOC_Os02g07650.1 // LOC_Os07g03770.1 // LOC_Os04g15690.1 // LOC_Os08g13980.1…
GO:0044430	C	cytoskeletal part	8	979	134	30241	0.079	1	// LOC_Os12g39980.1 // LOC_Os01g33040.1 // LOC_Os01g42070.1 // LOC_Os03g39020.1 // LOC_Os02g56540.1 // LOC_Os12g42160.1 // LOC_Os05g38480.1 // LOC_Os03g02290.1
GO:0043226	C	organelle	114	979	4284	30241	0.99	1	// LOC_Os12g39980.1 // LOC_Os03g56050.1 // LOC_Os03g21970.1 // LOC_Os06g43220.1 // LOC_Os07g32170.1 // LOC_Os07g03770.1 // LOC_Os01g33040.1 // LOC_Os06g51110.1 // LOC_Os01g52680.1 // LOC_Os06g44750.1 // LOC_Os12g41060.1 // LOC_Os09g25070.1 // LOC_Os01g59120.1 // LOC_Os06g08340.1 // LOC_Os09g29820.1 // LOC_Os02g43560.1 // LOC_Os03g03260.1 // LOC_Os09g31019.1 // LOC_Os12g05680.1 // LOC_Os06g01934.1…
